# Supplementary material
Source: Research Square preprint supplement (doi:10.21203/rs.3.rs-8651907/v1)
Supplement: Supplementary file 1 [file 059ca21db19f36c0ee484b9a.xlsx]

## Sheet: Legend
Sheet	Legend
Huh7 sgPLXNB2 vs. Vector	Differentially expressed genes of Huh7 sgPLXNB2 versus Vector xenograft tumors from RNA-seq.
Huh7-LR vs. Huh7-WT	Differentially expressed genes of Huh7-LR versus Huh7-WT cells from RNA-seq.
Huh7-RR vs. Huh7-WT	Differentially expressed genes of Huh7-RR versus Huh7-WT cells from RNA-seq.
Huh7 sgCOP1 vs. sgAAVS1	Differentially expressed genes of Huh7 sgCOP1 versus sgAAVS1 cells from RNA-seq.
Huh7 sgDET1 vs. sgAAVS1	Differentially expressed genes of Huh7 sgDET1 versus sgAAVS1 cells from RNA-seq.
Huh7 sgPLXNB2 - LVT vs. DMSO	Differentially expressed genes of Huh7 sgPLXNB2 xenograft tumors LVT-treated versus DMSO-treated from RNA-seq.
HLE-LR vs. HLE-WT	Differentially expressed genes of HLE-LR versus HLE-WT cells from RNA-seq.
HLE-RR vs. HLE-WT	Differentially expressed genes of HLE-RR versus HLE-WT cells from RNA-seq.
JHH7-LR vs. JHH7-WT	Differentially expressed genes of JHH7-LR versus JHH7-WT cells from RNA-seq.
JHH7-RR vs. JHH7-WT	Differentially expressed genes of JHH7-RR versus JHH7-WT cells from RNA-seq.
Huh7 DEPs in proteomics	Differentially expressed proteins from proteomics, Huh7-WT BTZ versus DMSO, Huh7-LR BTZ versus DMSO, Huh7-LR versus Huh7-WT cells.

## Sheet: Huh7 sgPLXNB2 vs. Vector
Symbol	log2FC	AveExpr	P.Value	adj.P.Val
SEMA3G	-1.27227	2.64172	7.17488e-06	0.0106104
TNC	-1.6455	2.75616	0.000335914	0.0483594
COL11A1	-1.02622	4.31364	3.04243e-05	0.0184468
FGFR2	-1.80382	2.70678	1.88911e-05	0.016007
FGFR1	-1.37598	3.87116	1.81578e-05	0.016007
SALL1	-1.4356	2.50504	0.000120957	0.0321662
SPP1	-1.2384	4.90939	2.33088e-05	0.0176657
SDCBP2	-1.09274	3.76115	9.18487e-07	0.00576898
KRT17	-1.34446	5.47614	0.000162824	0.036975
RNASE1	1.17699	3.10522	0.000311315	0.0465357
RAB25	-1.31813	2.13227	6.93777e-06	0.0106083
FHOD3	-1.29261	2.45905	0.000128159	0.0333499
FXYD2	-2.04798	1.87453	5.3569e-05	0.0225185
SQOR	-1.10892	2.84084	5.49667e-05	0.0225185
GALNT6	-1.25815	1.85114	0.000308837	0.0465357
KSR1	-1.25944	3.9508	4.08045e-06	0.00832483
LEFTY2	-1.42347	3.30269	0.000359371	0.0496341
GC	-1.41938	6.56225	0.000152115	0.0353373
SLC39A4	-1.03085	1.68518	0.000180478	0.0380259
NCAM1	-2.29691	3.10845	4.94305e-07	0.00576898
FEZ1	-1.17562	2.14941	6.70528e-05	0.024942
KCTD15	-1.03921	2.97743	0.000217289	0.0407291
RETREG1	1.03771	2.54543	0.000200332	0.0400876
HKDC1	-1.9513	3.2573	5.90496e-08	0.00358029
CACNA1D	-1.26824	1.98497	0.000226313	0.0411495
C1R	-1.1632	3.0432	7.52165e-06	0.0108584
CYP3A7	-1.24614	2.10449	1.90082e-05	0.016007
CADPS	-1.20908	1.50844	0.000143592	0.0344096
NMNAT3	-1.2257	1.27008	3.18537e-05	0.018751
FBP1	-1.51477	2.39741	1.35809e-06	0.00588171
PRAP1	-1.37491	1.63471	2.45291e-05	0.0181371
KRT80	-1.42219	4.86968	7.33525e-05	0.0260088
STK32A	-1.65834	1.55945	8.66656e-05	0.0278121
MT1E	1.01764	3.66764	5.11938e-05	0.0222103
MAB21L4	-1.37484	2.19183	8.76212e-05	0.0278121
ADCY5	-1.03271	2.68481	0.000140201	0.0344096
DAB1	-1.46425	1.16477	7.53093e-05	0.0265474
CNTNAP2	-2.02016	1.10094	5.10135e-06	0.00950081
TMEM51-AS1	-1.05907	2.36737	1.64695e-05	0.0157953
GIMAP7	-1.25612	1.67225	0.000104375	0.0299926
B3GNT3	-1.1652	2.21265	9.06197e-05	0.0283219
C6orf223	-1.057	1.37613	0.000218316	0.0407291
EPHB3	-1.13385	1.00909	0.00010271	0.0299926
AHNAK2	-1.21428	3.69132	2.62959e-05	0.0182638
MT1X	1.02957	3.68332	3.63542e-05	0.0193529
AKR1C3	-1.08545	3.31654	2.5079e-05	0.0182638
PPP1R26	-1.06741	2.21088	7.0274e-05	0.0256678
PLXNB2	-1.2012	9.59744	0.000142227	0.0344096
SVIL	-1.55676	3.5663	4.9032e-06	0.00950081
DMBX1	-1.40499	1.07514	0.000278818	0.0449679
HSPA1B	-1.10418	5.66087	0.000149599	0.035157
HSPA1A	-1.13502	5.74161	0.000175702	0.0380259
HLA-A	-1.11273	2.28666	0.000333518	0.0483594
HOTAIR	-1.02061	2.51222	5.35207e-05	0.0225185
PRKG1-AS1	-1.15163	1.29174	0.00024332	0.0426387
RP11-326C3.2	-1.82772	1.19516	0.000133588	0.0343209
LINC01979	-1.14651	2.39	1.19666e-06	0.00588171
RP11-622C24.2	-1.13698	2.2585	6.99847e-06	0.0106083

## Sheet: Huh7-LR vs. Huh7-WT
Symbol	log2FC	AveExpr	P.Value	adj.P.Val
LAS1L	-1.18629	5.76248	1.04069e-06	0.000105419
PRKAR2B	1.43462	5.01438	1.54041e-06	0.000129507
PHTF2	1.08509	6.70168	1.32987e-06	0.000119148
SCIN	-3.98807	4.6935	1.50624e-07	4.24668e-05
PROM1	2.24332	6.43192	1.89618e-07	4.69145e-05
CYB561	1.15424	4.18079	2.37825e-05	0.000642859
MAPK8IP2	-1.81772	4.23843	3.32616e-06	0.000194054
MLXIPL	-1.32953	4.07983	2.77124e-05	0.000714524
HFE	1.16171	4.24472	4.79278e-06	0.000240284
POLR3B	1.15584	4.12589	1.4779e-05	0.000476015
MDH1	-1.11111	7.02792	2.21169e-09	8.93772e-06
SLC30A9	1.16751	6.34774	6.78776e-09	1.09345e-05
WWTR1	1.12117	6.13127	4.36309e-06	0.000227921
FHL1	2.5623	4.03916	6.53995e-09	1.09345e-05
ANK1	2.60015	4.21309	6.82566e-08	2.99114e-05
TIMP2	1.05779	6.07439	1.17406e-06	0.000111299
MAT2B	-1.07223	4.93509	1.03432e-06	0.000105197
VCAN	1.02017	5.76157	9.71401e-07	0.000101174
CDH1	-1.07616	7.17455	3.37017e-08	2.22054e-05
LIMA1	1.06619	6.46716	2.43539e-07	5.2536e-05
FNIP2	1.2319	4.38788	5.45576e-05	0.00113842
OPN3	-1.46214	5.60716	5.46429e-06	0.000258168
GALC	1.2737	6.36757	1.95919e-07	4.7127e-05
CYFIP2	-1.87286	5.54729	1.89558e-08	1.77307e-05
MXD1	-1.12535	5.33527	7.52569e-06	0.000311182
YBX3	-1.48878	5.84057	4.08367e-07	6.49711e-05
SNCAIP	1.43911	4.1952	8.87855e-07	9.64259e-05
FAM107B	1.33295	8.03117	2.2036e-06	0.000156779
ERLEC1	-1.00518	6.27802	3.2672e-06	0.000192019
ELP1	-1.12501	6.4685	7.94367e-07	9.06788e-05
TCOF1	-1.22413	6.50801	8.35692e-08	3.28943e-05
ATP2B1	1.12912	6.09803	3.77907e-06	0.000208748
P4HA2	-1.69254	5.32267	8.70628e-08	3.36102e-05
ST6GAL1	1.09974	7.96522	1.17658e-07	3.75372e-05
ATP2A3	1.18675	4.57728	3.65834e-06	0.000205179
CA12	1.82236	4.52968	8.96806e-08	3.36102e-05
FSCN1	-1.17051	6.03353	3.95072e-06	0.000214974
SLC46A1	-1.51378	6.31407	1.12487e-08	1.35254e-05
MBNL3	-1.12258	8.08659	6.54339e-06	0.000286383
RAP1GAP	1.29335	6.01159	3.38369e-06	0.000195715
MAP2	2.00286	4.69322	7.60557e-07	8.8829e-05
TULP3	-1.02128	4.99098	3.22346e-08	2.21693e-05
EDN1	1.05948	5.29148	6.24504e-08	2.92441e-05
CDH17	1.37962	4.73609	1.62604e-05	0.000507287
SLC1A3	1.25362	5.66651	1.11466e-07	3.61323e-05
CEACAM1	1.19013	5.36318	6.99736e-06	0.000297447
PGM1	-1.68854	4.65044	6.81877e-07	8.55763e-05
ARG2	1.60826	4.53818	6.50261e-06	0.000285365
DELE1	-1.12842	4.64109	1.88228e-06	0.000144587
MECOM	1.20111	5.00829	2.39961e-06	0.000163251
AKR1B1	2.157	6.59482	1.1116e-07	3.61323e-05
CHMP5	1.08128	5.75949	7.15244e-07	8.68248e-05
NFX1	1.38208	5.17671	7.33489e-07	8.76486e-05
ASAP3	-1.04988	5.08061	1.22888e-05	0.000425906
DNMT3B	-1.49392	4.05258	8.97472e-09	1.20894e-05
EPB41L1	-1.11609	4.39155	2.92367e-07	5.67926e-05
SLC4A11	2.58179	5.81219	5.17266e-07	7.38058e-05
TESC	1.76203	4.62625	7.03815e-07	8.67394e-05
ICAM1	1.727	5.85061	1.37876e-06	0.000121051
P3H2	1.51244	6.15829	1.18491e-06	0.000111878
MAP3K20	-1.34157	7.11537	1.61873e-07	4.36581e-05
SEL1L3	1.37627	8.81838	7.00626e-08	2.99114e-05
APOH	-1.54503	5.5914	1.62656e-06	0.000132346
PITPNM3	1.9134	5.7162	5.19124e-09	1.09345e-05
EPB41L4B	-1.50423	4.87771	1.81383e-07	4.65e-05
NANS	-1.08565	6.32678	2.6461e-07	5.412e-05
MACROH2A2	-1.74647	4.83874	3.47248e-09	1.09345e-05
HSD3B7	1.32534	5.69869	9.80753e-06	0.000369027
MISP	-1.31141	6.76843	7.61449e-07	8.8829e-05
SUSD2	1.99079	4.37537	1.67715e-07	4.46866e-05
UPB1	1.35464	4.02976	8.61626e-06	0.000338711
POLR2F	1.04462	5.93557	5.23229e-06	0.000252204
TIMP3	1.1283	5.88848	2.19976e-07	4.97716e-05
PDGFB	1.29388	5.75839	1.11528e-06	0.00010904
PYGL	-1.10819	6.60832	7.80937e-07	9.01677e-05
LGMN	-1.20927	4.6041	1.28624e-05	0.000436306
PYGB	1.10493	8.75222	6.63594e-06	0.000288173
GABRE	1.34118	4.08744	4.28588e-06	0.000225805
MAGED2	-2.70486	5.61185	5.04485e-10	6.5501e-06
SLC7A5	1.07236	8.89499	1.02764e-06	0.00010519
RIPK2	-1.21638	4.95536	2.16532e-06	0.0001557
FGL1	-1.68772	5.94625	6.74774e-07	8.52141e-05
BNIP3L	-1.02384	6.14417	5.07804e-06	0.000247043
PPP1R13L	-1.5114	5.11325	6.66403e-06	0.000288332
OLFM2	1.1602	5.25292	2.04692e-05	0.000587102
SULT2A1	-1.14433	6.58265	7.28464e-06	0.000304743
MEGF8	-1.04004	5.91564	2.04249e-06	0.000151172
HIBADH	-1.04593	4.98575	2.38844e-07	5.20694e-05
TAX1BP1	-1.27841	7.32595	7.55078e-09	1.14598e-05
TFR2	-3.30268	4.0492	1.81368e-09	8.83303e-06
SERPINE1	1.61351	8.97526	2.05417e-06	0.000151663
AMBP	-1.2024	10.3225	3.46258e-07	5.90659e-05
NPDC1	-1.0596	4.65768	2.45831e-06	0.000165206
SHB	1.15673	5.76756	5.92262e-07	7.8216e-05
UNC5B	1.06016	5.72627	2.02428e-06	0.000150744
SPOCK2	1.01628	4.7701	2.407e-06	0.00016357
MAP3K8	1.36672	4.31013	6.31317e-09	1.09345e-05
TSPAN14	1.32254	6.57253	3.03135e-09	1.0732e-05
ENO3	-1.8404	5.4078	1.09834e-08	1.35254e-05
RASD1	2.61336	6.05987	1.19719e-07	3.75532e-05
UTP6	-1.02111	5.48703	2.17532e-06	0.000155864
C17orf75	-1.15648	4.24361	6.27962e-05	0.00125711
PSMD11	-1.04071	7.48923	2.67705e-07	5.412e-05
LGALS3BP	1.20628	5.21593	7.70579e-06	0.000316036
TMEM33	1.51826	5.87687	9.51936e-06	0.000362005
SOD3	2.39375	5.66718	7.3099e-08	2.99968e-05
STIM2	1.25032	4.89356	1.32971e-06	0.000119148
UGDH	1.01552	6.51357	4.37404e-06	0.000227921
DTX4	-1.18454	4.89205	7.57126e-07	8.8829e-05
SH2B3	1.20419	5.51901	7.09814e-07	8.67476e-05
SCNN1A	-1.46659	4.91837	1.88954e-07	4.69145e-05
OAS3	2.03144	5.06697	1.15331e-06	0.000110141
MDGA1	1.08524	4.69608	9.80335e-06	0.000369027
ALDH5A1	-1.16007	4.09509	4.46015e-08	2.39257e-05
CCR6	1.70351	4.65137	1.33101e-06	0.000119148
CCNG1	-1.33003	6.318	2.48498e-07	5.31785e-05
CDH6	-1.50536	4.14205	2.32816e-06	0.000160919
PDE4D	1.51005	4.86776	4.84207e-05	0.00104714
PRLR	-1.00173	4.59927	3.85398e-06	0.000211418
RNF7	1.00959	6.01141	3.01633e-06	0.000184023
HES1	-1.10336	7.9876	1.33263e-07	3.9718e-05
UPK1B	2.58169	4.91948	5.30251e-07	7.49406e-05
PLSCR4	1.46632	4.18075	3.32195e-06	0.000194054
ABHD14B	1.13504	4.3357	7.3577e-05	0.00139856
ARHGEF26	1.21219	4.0906	6.43862e-05	0.00127671
ADAM23	1.40698	4.41467	2.62494e-07	5.39376e-05
RTKN	-1.01949	5.52671	1.72729e-05	0.000525618
CCL20	1.29644	6.67725	1.69509e-06	0.000136094
REEP6	-1.05274	6.61681	3.1529e-06	0.000189415
AUP1	-1.08402	6.38558	9.47354e-06	0.000360715
PECR	1.06038	5.15453	2.55211e-07	5.31884e-05
CCT4	-1.16557	7.8942	6.37071e-08	2.92556e-05
FHL2	1.08164	5.8756	6.25787e-07	8.10541e-05
SLC1A4	-1.02145	5.11018	1.71237e-05	0.000522916
PCYOX1	-1.06181	6.57628	6.51821e-07	8.30072e-05
MSH6	-1.2796	6.44885	4.80411e-09	1.09345e-05
IVNS1ABP	1.17131	5.58871	3.67168e-07	6.1313e-05
SIPA1L2	1.66456	4.34635	3.10439e-07	5.77895e-05
APOA1	-1.19916	5.69905	1.29158e-05	0.000437138
NRP2	-1.5918	4.29762	4.27007e-06	0.000225273
TTR	2.61056	7.45733	8.96101e-08	3.36102e-05
SGK1	-1.97581	7.10766	6.96464e-08	2.99114e-05
FOXO3	-1.09652	5.59302	2.80832e-06	0.000176041
SPP1	2.73318	5.76031	1.03231e-07	3.47641e-05
MFSD1	1.13954	4.85835	1.01596e-05	0.000377818
PTBP3	-1.47683	7.97423	5.86611e-07	7.79793e-05
FKBP15	-1.18554	4.2763	7.04783e-06	0.000297925
HDHD3	-1.74799	4.0334	5.80185e-06	0.000267039
PGF	1.43646	4.56943	8.22083e-06	0.000328275
LGALSL	-1.6148	5.31101	1.60892e-07	4.36581e-05
EPCAM	-1.83461	6.54084	2.66098e-08	1.96708e-05
OGFRL1	1.46666	5.60117	1.62886e-05	0.000507903
GPAM	-1.23123	5.40494	4.17627e-06	0.000222455
RCL1	1.32377	4.22677	1.23397e-05	0.000427104
CAAP1	1.17832	4.51066	1.04757e-05	0.00038462
NPPB	-2.186	6.95832	2.34367e-11	1.42066e-06
TRIM6	-1.15682	4.44805	2.79224e-06	0.000175215
KCNJ8	-1.39283	4.6176	1.38142e-06	0.000121051
MAPK8IP1	-1.1189	4.01633	1.10946e-05	0.000398734
SMU1	1.11213	5.72115	1.15344e-06	0.000110141
ACSL3	1.31151	8.09746	1.61301e-06	0.000131599
CDKN1A	1.42292	6.07028	1.25121e-08	1.41769e-05
MYRF	1.19758	8.21725	2.20086e-06	0.000156779
SH3TC1	1.27105	5.66064	1.60554e-06	0.000131599
CHCHD5	1.03207	4.18117	7.38185e-05	0.00140158
RTN2	-1.21377	4.24244	7.25643e-07	8.72787e-05
MMP24OS	1.03224	4.72513	5.01947e-06	0.000245749
L3HYPDH	1.11015	4.41688	1.14552e-05	0.000406547
RHOT1	-1.47175	4.07869	7.2228e-06	0.000303202
KLF2	1.79698	5.82936	9.50078e-08	3.39042e-05
TXNDC17	1.04171	6.14404	0.000105573	0.00180726
MPDU1	1.03584	6.47927	3.87012e-06	0.00021192
SEC14L1	1.04477	6.26686	1.26864e-07	3.85038e-05
GDF15	1.77589	8.57522	5.77521e-07	7.74505e-05
ASS1	-2.39387	5.17692	1.72434e-06	0.000137465
MAP3K10	-1.11251	4.4574	7.02532e-06	0.000297925
SLC6A8	-1.14989	5.7105	2.39533e-08	1.90129e-05
RAB11FIP4	-2.08879	6.48723	2.37432e-10	4.79747e-06
DIAPH1	-1.10475	7.52824	1.61702e-07	4.36581e-05
NDFIP1	-1.29433	6.22487	1.26808e-06	0.000117046
PRKAB2	-1.51243	4.60193	5.90895e-07	7.82059e-05
NUP210	-1.4039	6.61618	5.16285e-07	7.38058e-05
SERPINF1	-1.55308	5.52691	4.54917e-08	2.41892e-05
DDC	-1.33225	4.31122	1.2927e-06	0.000118011
PATJ	-1.48501	5.22686	2.05914e-07	4.86647e-05
ANGPTL3	-4.31566	4.62274	3.30193e-07	5.86972e-05
RNF128	1.31764	6.19654	3.20053e-06	0.000190543
C1QTNF6	1.24465	4.68091	3.09263e-07	5.77895e-05
NTS	1.69072	9.24365	1.65375e-08	1.69908e-05
ATP13A3	1.02802	7.79285	1.31588e-05	0.000442647
GSTM1	1.2408	6.12136	1.1217e-06	0.00010915
GSTM3	1.33674	6.93159	1.10966e-08	1.35254e-05
MYCN	-1.04602	4.18212	5.57315e-05	0.00115655
EMP1	3.26643	4.35198	3.9224e-09	1.09345e-05
TPGS2	-1.57938	5.01547	8.5411e-08	3.31882e-05
DAGLA	1.00951	4.62417	1.30935e-05	0.000440692
PDGFRA	2.50438	5.16666	1.50402e-07	4.24668e-05
COL4A2	2.63003	5.61251	3.44217e-08	2.22301e-05
AGTPBP1	-1.2055	4.64315	1.33667e-07	3.9718e-05
CCNJL	1.37789	4.78901	8.39892e-05	0.00153998
CCT7	-1.33295	8.37054	5.75803e-07	7.74056e-05
CPM	-1.47411	6.06777	1.39977e-09	8.485e-06
DRAM1	1.45708	5.28838	3.48997e-07	5.90926e-05
IGF2BP3	-1.18925	5.74726	4.50084e-07	6.90702e-05
BIN1	1.33677	6.67725	8.68217e-09	1.19611e-05
SLC31A1	-1.08735	6.86853	2.52183e-08	1.93501e-05
KIF12	-1.14126	5.57481	4.34551e-07	6.80651e-05
ENPP2	-1.94155	5.43861	8.7681e-10	6.6437e-06
MYC	1.44145	5.79202	2.17317e-05	0.000612988
PLAA	1.50117	5.75251	7.52024e-10	6.6437e-06
APTX	1.08648	4.79902	2.61878e-08	1.95979e-05
DCTN3	1.08083	5.37606	1.67622e-06	0.000135117
MYO7A	-1.00589	4.10783	6.60689e-05	0.00129734
THBS1	1.32877	8.93616	3.44726e-08	2.22301e-05
GCOM1	2.13462	4.58932	6.45582e-07	8.25596e-05
MYOF	1.24302	5.01103	1.15508e-06	0.000110141
LOXL4	-1.14368	6.65847	3.74911e-08	2.26856e-05
DUSP5	2.07537	6.84853	2.2596e-08	1.85095e-05
ITGAV	1.15737	7.81596	2.11391e-05	0.00059941
MTTP	-1.29268	6.38431	3.70253e-06	0.000206094
FGD4	1.15242	6.10262	1.63058e-05	0.000507917
CLSTN3	-1.55177	6.82509	3.77936e-07	6.25939e-05
INHBE	-1.02106	7.85539	8.66376e-07	9.56596e-05
PHLDA1	2.39523	6.86586	7.05837e-08	2.99201e-05
DUSP6	2.22375	4.8587	4.76843e-08	2.51346e-05
LUM	1.92419	8.33469	6.27259e-09	1.09345e-05
SLC39A5	-2.12283	4.80172	6.11581e-08	2.91907e-05
FRMD6	1.1058	4.06818	8.30277e-05	0.00152836
FBLN5	-1.54179	4.82664	4.11189e-08	2.30711e-05
PCSK6	1.31185	6.78311	3.18814e-06	0.000190543
OSGIN1	2.03332	5.07407	3.52989e-06	0.000200723
SSH2	-1.56097	5.49411	5.09357e-07	7.33389e-05
COL6A1	1.06864	5.85	1.15502e-07	3.70443e-05
COL6A2	1.6226	4.44868	7.23091e-07	8.72787e-05
SLC47A1	1.02061	4.53961	4.97215e-05	0.0010684
EPHA2	1.04909	7.87616	1.26998e-06	0.000117046
CREG1	-1.24706	4.47346	7.4216e-06	0.000308669
EXOC6B	-1.03995	5.53589	7.90496e-07	9.06788e-05
SLC20A1	1.05496	6.96477	1.13796e-08	1.35254e-05
HES6	1.05696	5.36532	2.57682e-05	0.000677653
EPHA5	2.19317	4.50968	3.46891e-07	5.90659e-05
GC	-1.67905	7.25895	2.33143e-07	5.13907e-05
USP53	1.04883	5.76748	1.41357e-05	0.000464172
OSMR	1.05901	5.31175	5.68571e-06	0.000264405
TNIP1	-1.13909	5.53396	8.42703e-06	0.000334526
PNRC1	-1.12119	5.16773	5.41498e-07	7.49406e-05
EPHA1	-1.63656	4.28316	4.43018e-07	6.83319e-05
ZMYM3	-1.53529	5.06972	9.17184e-07	9.80546e-05
GPC3	-1.35646	9.78217	9.49378e-08	3.39042e-05
PLPBP	-1.0994	5.36679	2.52959e-07	5.31785e-05
NSD3	-1.19046	5.71732	1.30925e-05	0.000440692
SIGMAR1	1.11497	6.6638	6.03062e-06	0.000272215
AOPEP	-1.00999	5.52175	2.41759e-06	0.000164106
GSN	-1.27474	6.57469	4.57603e-07	6.95201e-05
ALAD	-1.22862	6.14764	6.80081e-08	2.99114e-05
GLUD1	-1.2117	10.3706	5.93559e-09	1.09345e-05
HABP2	-3.22911	4.31397	1.90128e-08	1.77307e-05
PTS	1.25739	5.17877	1.45074e-05	0.000471272
SLC7A11	1.18953	4.82152	0.000116596	0.00193794
ITIH2	-2.8619	6.9303	2.41515e-08	1.90129e-05
GUCY1A2	-1.77164	4.34252	5.04198e-08	2.59205e-05
MBNL1	1.05599	6.64729	1.62138e-05	0.000506355
ZIC1	1.11228	5.19113	5.01646e-06	0.000245749
TRAPPC8	1.06193	4.09279	5.77027e-06	0.000266615
CMIP	1.0823	7.41604	2.94247e-06	0.000180896
UBASH3B	2.12468	4.00828	2.52349e-06	0.000167071
UCHL1	1.03471	8.18347	1.87149e-06	0.000144288
SLC7A7	-1.29413	6.55886	1.92792e-07	4.71229e-05
XAGE2	1.86497	6.43172	1.71496e-07	4.50026e-05
TTN	1.73276	6.95254	2.95507e-06	0.000181303
LRP8	1.20621	4.36347	1.02296e-06	0.000105171
TSC22D3	2.08858	7.07175	3.11674e-08	2.17158e-05
TMEM164	1.12132	5.23221	4.89195e-06	0.00024207
SLC34A2	-1.45056	4.9184	3.24603e-06	0.000191779
DMTN	-1.12228	7.03688	8.86791e-07	9.64259e-05
APOA2	-1.7489	8.25136	3.15516e-09	1.0732e-05
SLC37A1	1.0174	4.01873	7.9983e-05	0.00148767
DEDD2	-1.20939	5.08935	8.53177e-08	3.31882e-05
TONSL	-1.15925	4.36455	7.95835e-07	9.06788e-05
RECQL4	-1.00557	5.37352	1.30592e-05	0.000440272
PCYT1A	1.06126	6.23512	1.20392e-07	3.75532e-05
EMC10	-3.59788	5.02125	3.63654e-08	2.25157e-05
ASGR2	-1.04944	6.8954	1.32093e-06	0.000119148
SDC3	1.43812	5.57234	2.94852e-08	2.12774e-05
GBP2	2.40563	4.44804	4.17463e-08	2.30711e-05
FSTL1	1.23875	6.06802	1.19664e-07	3.75532e-05
CCDC141	1.40553	5.78377	7.34538e-07	8.76486e-05
FABP1	-2.90456	4.6835	1.55064e-08	1.66714e-05
TIPARP	1.28244	7.7494	6.32017e-07	8.15127e-05
CCNL1	1.07628	7.05079	4.77318e-06	0.000239961
PCOLCE2	1.14484	5.01144	6.02909e-06	0.000272215
CXCL5	1.5571	4.66325	1.36413e-06	0.000120891
CXCL1	1.34512	7.12606	9.5663e-08	3.39042e-05
RCHY1	1.19973	4.0223	2.50726e-06	0.00016675
LIPH	1.20506	6.25598	3.48556e-07	5.90926e-05
RPL39L	1.16543	4.86217	5.07165e-06	0.00024693
PIGX	1.10262	5.44593	2.96063e-07	5.67926e-05
MELTF	1.30101	5.25458	1.72216e-06	0.000137465
S100P	1.06068	8.71775	1.48734e-06	0.000127162
SPRY1	1.55178	4.7227	2.77294e-07	5.51105e-05
HPGD	1.55673	6.24812	7.28294e-08	2.99968e-05
RHOBTB3	1.17628	6.64546	3.13217e-06	0.000188543
FOXQ1	1.83824	5.31465	1.52996e-07	4.2936e-05
SAP30L	-1.06842	5.24535	5.90847e-06	0.000270121
CAMLG	-1.14888	4.73581	9.62028e-08	3.39042e-05
SLC29A4	-1.07771	5.89296	1.57544e-05	0.000496612
SP8	-1.01173	4.01362	3.3794e-06	0.000195653
OXR1	-1.34828	4.227	7.07167e-07	8.67476e-05
FZD6	-1.35995	4.64362	2.04102e-06	0.000151172
PDP1	1.14173	5.06266	2.20168e-05	0.000615942
FAM219A	1.29155	6.0391	1.89434e-09	8.83303e-06
RASEF	-1.21566	4.51377	2.2417e-05	0.000621003
CASP7	-1.26496	4.79894	5.91764e-06	0.000270121
NAV2	-1.32027	4.83451	3.54008e-07	5.96081e-05
IGF2	-4.70906	7.31781	5.40286e-10	6.5501e-06
TRAPPC2L	1.03961	6.51129	4.75504e-09	1.09345e-05
FNTA	-1.01555	6.32433	1.59245e-07	4.36581e-05
NPNT	-2.90579	4.43706	7.7913e-09	1.14598e-05
GFM1	1.10985	5.97997	8.69511e-07	9.57095e-05
COMMD8	1.02279	4.05525	1.82312e-05	0.000543591
CXCL8	1.91463	5.85592	2.52562e-06	0.000167071
UGP2	-1.07541	7.20429	1.38861e-07	4.06591e-05
PCDH7	2.97019	4.19159	7.57791e-09	1.14598e-05
ONECUT1	-1.46951	4.83627	5.6321e-09	1.09345e-05
TM4SF1	1.18201	8.91563	4.2543e-09	1.09345e-05
CRTAP	-1.19375	6.03131	3.18684e-09	1.0732e-05
SEMA3E	-1.06343	5.90568	5.40683e-07	7.49406e-05
CD14	-2.00463	6.09059	1.55936e-07	4.33635e-05
HS6ST2	1.1265	4.60283	2.13565e-06	0.000154858
TRIM8	1.10601	5.51787	1.80869e-06	0.000141115
FGG	-1.25332	8.8054	5.72759e-07	7.74056e-05
FGA	-1.02091	9.98978	6.43445e-07	8.25596e-05
FGB	-2.00695	9.49163	4.00599e-08	2.30661e-05
HDAC3	-1.22131	6.29897	2.05982e-07	4.86647e-05
PAH	-1.17326	4.37824	2.17676e-07	4.96047e-05
LAMB2	-1.48291	6.34883	1.56147e-06	0.000129865
KLF11	-1.05385	4.8367	1.78721e-07	4.63319e-05
KRCC1	-1.01107	4.06147	0.000106115	0.00181193
FRMD3	2.26416	4.22093	1.2704e-07	3.85038e-05
SPTLC3	-1.06369	4.52317	6.63216e-05	0.00130062
MIR4435-2HG	1.78187	6.47353	5.28938e-11	1.60313e-06
LRRN3	-1.01695	4.78254	1.44915e-05	0.000471212
SYT12	-1.04959	4.87302	7.72992e-06	0.000316153
NABP1	1.55842	5.87034	2.7147e-06	0.000172492
KLHL15	-1.1714	5.46621	1.42624e-06	0.000123154
CTSF	-1.832	4.92427	1.07608e-06	0.00010758
PODN	2.30187	4.21581	5.47899e-09	1.09345e-05
FZD4	1.26527	6.81272	2.06325e-07	4.86647e-05
YPEL2	-1.1228	6.05981	3.39883e-07	5.86972e-05
LONRF3	1.20749	4.56847	1.32663e-06	0.000119148
ETV4	1.38665	6.33632	3.27525e-06	0.000192019
NUPR1	-2.6862	6.03383	1.11569e-08	1.35254e-05
CSTF3	-1.11352	4.90615	8.55217e-06	0.000337724
BNIP3	-1.08472	5.79967	2.15487e-06	0.000155317
DCAF4L2	1.1655	4.53154	2.02811e-05	0.000583472
MYO1D	-1.79033	7.06926	7.94023e-09	1.14598e-05
TCIM	-1.97023	6.2714	8.89223e-07	9.64259e-05
GRINA	-1.18009	6.36818	1.53879e-06	0.000129507
ADORA2A-AS1	1.18806	5.25545	1.22683e-05	0.000425438
DPM3	1.32391	4.81247	5.20585e-06	0.000251584
TMTC2	1.9586	4.08759	4.16308e-07	6.58886e-05
TMEM151A	-1.66607	4.83316	1.20858e-07	3.75532e-05
GEMIN4	1.00043	4.56684	1.43253e-05	0.000467864
MAF1	-1.37134	5.83358	4.4857e-06	0.000231139
TMEM86B	2.14907	5.00328	3.06279e-07	5.77895e-05
PAK2	1.2865	8.59023	8.29126e-07	9.32452e-05
H2AC6	1.5721	4.20367	2.59269e-06	0.000168492
SSTR2	2.16405	4.16052	4.70432e-07	7.04629e-05
SCRIB	-1.07024	5.47888	2.86275e-05	0.000730658
RAP2B	1.47135	6.05558	6.913e-08	2.99114e-05
DIPK2A	1.05009	7.78104	1.86258e-05	0.000551828
CCDC149	1.04316	5.76341	9.40546e-07	9.92138e-05
P2RY8	1.1743	4.34296	2.8203e-05	0.000722785
SYNM	1.51135	5.33677	3.05449e-07	5.77895e-05
PAPPA	-1.28395	4.09404	9.19523e-06	0.000354572
ABAT	1.25784	5.24433	5.12679e-09	1.09345e-05
KIRREL1	1.01022	4.94342	3.91538e-06	0.000213598
PRKD1	1.24218	6.18734	5.70817e-07	7.74056e-05
TOP1MT	-1.03312	4.02825	4.56979e-05	0.00100731
CLDN6	-1.85723	5.85851	2.34514e-07	5.15056e-05
SEPTIN5	1.08981	4.99345	0.000300445	0.00387274
OSBP2	-1.44031	4.73485	4.67135e-06	0.000236957
DGAT1	-1.69902	4.54731	5.85637e-06	0.000268326
MAFF	1.04089	7.14671	1.28875e-06	0.000117828
METTL7A	-1.26074	4.47865	1.67084e-05	0.000514379
RXRA	-1.18267	6.86104	1.43801e-06	0.000123818
RTN4RL2	-1.12852	5.28487	1.59605e-05	0.000501025
ZNF395	-1.14924	4.9426	9.66547e-07	0.000100926
ESPN	-1.17734	5.38987	0.000177668	0.00262612
TMPRSS6	-2.7204	4.49429	2.23269e-08	1.85095e-05
COL4A1	1.78226	5.6855	7.45528e-08	3.033e-05
H1-2	1.94686	5.13468	4.18664e-08	2.30711e-05
SLC38A3	-2.46194	4.3232	1.4851e-07	4.2297e-05
IER5L	1.48194	5.89424	1.60944e-06	0.000131599
ZBED6CL	1.17942	4.33915	1.13504e-06	0.000109695
PAX8-AS1	1.18134	4.74064	1.37415e-06	0.000121051
TSC22D2	1.00183	6.36783	2.65185e-07	5.412e-05
SLC30A10	-1.47209	5.12285	2.74386e-06	0.000173293
DAPK1	-1.35825	7.61357	2.14854e-08	1.85095e-05
ANXA4	-1.22117	7.63071	6.85468e-09	1.09345e-05
ADARB1	1.31873	4.62634	3.31989e-06	0.000194054
TOPORS	1.03401	4.69488	9.61962e-06	0.000364671
ENTPD6	1.07292	7.18144	2.75443e-06	0.000173741
NMB	1.26765	4.23815	1.65214e-05	0.000510959
H2BC12	1.07765	4.79364	1.62052e-07	4.36581e-05
PLCG2	1.14222	4.33791	5.64255e-06	0.000264119
S100A6	1.41327	8.63448	3.07066e-05	0.000772342
PIM3	1.35498	8.50916	5.17785e-08	2.61555e-05
GFPT1	-1.02368	7.13207	1.71054e-06	0.00013709
TXNRD1	1.68181	8.56991	8.44534e-10	6.6437e-06
TPM2	1.11361	7.91285	2.46765e-08	1.91771e-05
SMOC1	1.09485	4.18748	2.20116e-06	0.000156779
LTN1	-1.04283	5.70106	8.37743e-06	0.000333649
TCEA3	-1.36322	5.71096	2.53536e-07	5.31785e-05
ZBTB10	-1.44003	4.19082	3.9472e-05	0.000913584
SNX2	-1.09374	5.63646	1.48507e-06	0.000127162
TMSB4X	-1.17635	4.13259	2.95127e-05	0.000749779
DENND6B	1.13877	4.17988	8.36429e-06	0.000333451
VGLL3	1.06169	11.6751	0.000233536	0.00321222
STK38L	1.06133	6.31475	1.05678e-05	0.000386597
CCDC183	-1.36683	4.76643	4.72292e-05	0.00102945
APOC4-APOC2	-1.50825	4.6795	0.000182644	0.0026807
ERVMER34-1	1.17156	5.61626	2.25958e-06	0.000158403
LINC00511	1.3361	5.20936	1.08524e-06	0.0001081
ORM1	-1.05524	7.89875	4.77459e-06	0.000239961
APOC2	-2.2058	6.36834	1.28153e-06	0.000117522
OLMALINC	-1.73554	5.0646	1.8416e-07	4.6708e-05
PNMA2	1.03508	4.62186	3.96565e-05	0.000916803
SNHG3	1.31843	5.55236	3.54464e-06	0.000201185
SCARF2	1.06077	4.16585	3.11619e-06	0.000188142
APOBEC3C	1.01814	4.20781	2.03048e-06	0.000150835
NEAT1	1.15753	5.91386	5.44938e-05	0.00113842
RFPL4B	-1.34376	5.09544	5.47125e-08	2.71845e-05
MALAT1	1.38848	5.51913	1.73082e-05	0.000526428
HCAR3	2.00898	4.30992	3.9188e-06	0.000213598
ANXA8L1	1.32685	6.02311	1.40755e-06	0.000122237
SNHG8	1.0411	6.01707	0.000186476	0.00272508
SRXN1	1.27974	7.01478	1.01156e-07	3.4448e-05
PCDHGB5	-1.15265	4.93995	3.07056e-05	0.000772342
IQCJ-SCHIP1	1.40471	5.97752	5.98123e-08	2.87749e-05

## Sheet: Huh7-RR vs. Huh7-WT
Symbol	log2FC	AveExpr	P.Value	adj.P.Val
LAS1L	-1.01689	5.85955	5.31642e-07	4.83947e-05
CYP26B1	1.74042	6.16561	7.86744e-10	4.75799e-06
SCIN	-4.58707	4.41276	1.91329e-07	2.98911e-05
PROM1	1.69545	6.17227	1.10256e-06	7.29066e-05
MAPK8IP2	-1.58611	4.36441	4.4394e-06	0.0001754
SYT7	1.80427	4.80997	3.99573e-07	4.35181e-05
NR1H4	2.12241	4.88052	8.79923e-08	2.01277e-05
MAMLD1	-1.60376	5.21668	7.98235e-07	6.06349e-05
PLEKHO1	1.17063	5.26919	1.42925e-06	8.45239e-05
HMGB3	-1.66562	4.88136	1.93042e-08	1.00014e-05
MAT2B	-1.33789	4.8095	2.65842e-06	0.000124822
VCAN	1.44451	5.98724	4.83274e-06	0.000186234
CDH1	-1.27258	7.08816	3.09537e-09	6.47007e-06
LETMD1	1.09699	5.03539	1.20787e-06	7.65871e-05
FNIP2	1.00601	4.28716	0.000175441	0.00232656
GALC	1.34377	6.41767	2.85727e-07	3.67726e-05
CYFIP2	-2.65322	5.17121	9.56236e-09	8.31662e-06
MTA3	-1.00438	4.49771	4.64017e-07	4.58763e-05
ZNF275	-1.25453	4.11649	1.04962e-06	7.07731e-05
MTMR1	-1.52292	4.53587	1.10214e-07	2.2571e-05
HAGH	-1.11232	4.95538	6.60575e-07	5.46276e-05
SLC12A2	-1.00495	5.63823	2.14451e-06	0.000109221
SNCAIP	1.63051	4.30215	3.51727e-07	4.10013e-05
IDH3G	-1.41822	4.74527	4.9966e-07	4.70971e-05
PDK3	-1.05417	4.2152	2.12538e-06	0.000108629
TCOF1	-1.07738	6.59433	6.28266e-08	1.74695e-05
ATP6AP1	-1.20469	6.47474	8.37779e-08	1.93831e-05
FAM50A	-1.40786	6.0737	2.92801e-07	3.7209e-05
FAM3A	-1.17876	4.6946	3.31166e-07	3.95942e-05
HMMR	-1.2818	5.12096	8.37047e-07	6.16671e-05
TMEM38A	1.56488	4.82733	2.06811e-06	0.000106782
IGF2BP2	1.40701	6.46824	2.94298e-10	2.97324e-06
ST6GAL1	1.18087	8.01826	5.19941e-09	7.20928e-06
ATP2A3	1.45129	4.72114	1.69481e-06	9.43645e-05
CA12	1.92105	4.59092	7.85059e-08	1.88216e-05
SEMA3A	1.10501	4.03758	0.000121847	0.00177536
CELSR1	1.30345	6.30716	1.96085e-07	2.99694e-05
SLC46A1	-1.42804	6.37164	3.34858e-08	1.25296e-05
MBNL3	-1.16314	8.0787	2.52003e-07	3.4672e-05
DGKD	1.05479	5.04743	4.97547e-06	0.000189446
PIAS2	1.26322	4.66208	4.45794e-06	0.000175814
SLC1A3	1.90632	6.00634	3.88249e-10	3.36207e-06
CEACAM1	1.00762	5.28598	4.65856e-07	4.58763e-05
PGM1	-1.16942	4.92312	4.19893e-06	0.000168004
MOXD1	-1.27999	4.10979	9.72986e-06	0.000296822
PUM3	1.02959	5.04696	1.98623e-06	0.000103972
CXCL2	1.22934	4.24818	4.95851e-05	0.00093229
AFP	-1.93912	9.80908	1.24715e-08	8.96205e-06
ARG2	1.09368	4.29652	1.57641e-08	9.52433e-06
MEF2C	1.28349	5.03632	3.5566e-07	4.12219e-05
MECOM	1.34851	5.09547	9.96192e-08	2.14897e-05
PREP	1.11998	6.59504	9.25578e-09	8.28009e-06
AKR1B1	1.05248	6.05521	2.70532e-08	1.15898e-05
SLC4A11	1.70102	5.38582	6.51016e-08	1.75845e-05
TESC	1.48011	4.49574	4.70633e-06	0.000182874
LTBP4	1.1716	5.43281	1.12711e-06	7.37872e-05
ICAM1	2.13077	6.06413	4.58215e-08	1.42989e-05
P3H2	1.77294	6.30174	2.71021e-07	3.56366e-05
EXOC1	1.1597	4.09516	2.7463e-07	3.58373e-05
SEL1L3	1.05453	8.67091	6.00214e-10	4.04257e-06
APOH	-1.51774	5.61814	3.84425e-07	4.27572e-05
COL9A3	1.63763	5.30873	7.66122e-09	8.26854e-06
PGC	1.01948	4.44562	1.88534e-07	2.96071e-05
MACROH2A2	-1.38705	5.0306	4.36617e-08	1.39297e-05
HSD3B7	1.05971	5.5765	4.81696e-05	0.000913895
MISP	-2.0941	6.3929	9.92626e-08	2.14893e-05
CECR2	1.0653	5.31559	2.79826e-05	0.00062019
SUSD2	2.11506	4.45129	2.51938e-07	3.4672e-05
GRK3	1.38093	4.6315	1.09893e-06	7.28814e-05
TIMP3	1.2795	5.97744	5.24836e-09	7.20928e-06
PNPLA3	1.29205	4.68232	4.24592e-07	4.47747e-05
PLTP	1.21183	4.84204	1.44295e-05	0.000389435
EEF1A2	1.13631	7.33862	2.78344e-07	3.59741e-05
TRIB3	1.34132	9.28881	1.12066e-06	7.37582e-05
LIPG	1.18823	4.64256	2.95514e-06	0.00013388
POLA1	-1.02281	5.26765	8.45614e-07	6.19563e-05
ABCD1	-1.78281	4.47193	2.61379e-07	3.49847e-05
NAA10	-1.75942	5.03188	1.95128e-08	1.00238e-05
ELF4	-1.02322	5.43149	8.72593e-07	6.31947e-05
FMR1	-1.06323	5.26106	1.36882e-05	0.00037443
EMD	-1.33426	5.33058	1.98464e-08	1.01095e-05
USP11	-1.07035	5.93157	7.42776e-07	5.84738e-05
ARL2BP	-1.09371	4.76783	2.03697e-08	1.02896e-05
NDRG1	-1.62942	5.9603	1.01403e-07	2.16434e-05
ANXA13	-1.63195	5.47368	1.45817e-08	9.22792e-06
MCM4	-1.01647	8.00802	3.43079e-09	6.93215e-06
FGL1	-1.22603	6.18988	7.75225e-08	1.88216e-05
TNNT1	1.51465	4.35798	3.1696e-06	0.000140102
SYDE1	1.39134	4.09138	3.56762e-06	0.000150883
TGFB1	1.18612	5.71895	1.27598e-06	7.90759e-05
MYH14	-3.3186	4.30101	1.79024e-08	9.70915e-06
MEIS3	2.59161	4.05512	1.56753e-07	2.71932e-05
HBP1	-1.04271	4.94368	4.52898e-06	0.000178066
CAV2	-1.63782	4.96318	2.19093e-08	1.07536e-05
TAX1BP1	-1.17275	7.39032	1.80373e-08	9.70915e-06
TFR2	-2.69597	4.36781	1.67252e-09	5.63239e-06
AGFG2	-1.17773	6.60452	5.87797e-07	5.12669e-05
SERPINE1	1.35384	8.85957	9.54206e-10	4.82009e-06
RARRES2	1.30632	5.91394	2.14986e-05	0.000513219
AMBP	-1.45695	10.2055	1.22194e-07	2.4206e-05
NPDC1	-1.23746	4.5755	2.46088e-06	0.000119187
RASSF4	1.16332	5.88181	1.17648e-07	2.34489e-05
UNC5B	2.11812	6.26707	2.93418e-10	2.97324e-06
SPOCK2	1.42276	4.98534	4.57671e-07	4.58763e-05
KAZALD1	1.19895	5.2627	1.46144e-08	9.22792e-06
LHPP	-1.13513	4.91269	3.25889e-06	0.000142528
STN1	1.03577	4.20042	4.52971e-06	0.000178066
MAP3K8	1.20364	4.24361	8.66198e-07	6.30605e-05
TSPAN14	1.13237	6.48908	3.09597e-08	1.22922e-05
RASD1	1.95323	5.74488	7.82025e-08	1.88216e-05
CPD	-1.06812	7.69202	9.12785e-07	6.5248e-05
C17orf75	-1.05793	4.30761	7.31058e-06	0.000244157
PSMD11	-1.31618	7.3625	2.05697e-06	0.000106329
NAT9	1.05382	4.64147	2.05577e-05	0.000496869
PMP22	1.05771	5.24585	2.56693e-07	3.4711e-05
TMEM33	1.19886	5.73088	2.21075e-06	0.000111682
USP46	1.03039	6.41708	2.55394e-06	0.000121831
TBC1D9	-1.63801	5.39999	1.06221e-07	2.20506e-05
GALNT7	1.14111	5.44606	1.23308e-05	0.000350248
SOD3	1.7826	5.37295	1.77159e-07	2.87166e-05
FOXM1	-1.03934	6.92332	1.26563e-08	8.96205e-06
SH2B3	1.47071	5.66446	3.26483e-08	1.2369e-05
COL12A1	1.11188	5.04121	0.000190844	0.00248535
NCOA7	1.59055	6.66793	4.26619e-07	4.48965e-05
CRYBG1	1.21347	5.58197	2.68944e-08	1.15898e-05
EYA4	1.25898	5.00276	1.13491e-05	0.000331381
CCR6	1.35596	4.49142	2.91357e-06	0.000132722
BRD8	-1.15371	4.86229	1.57319e-06	9.07387e-05
LOX	1.44592	5.17928	4.80486e-07	4.64612e-05
CLINT1	-1.12245	6.52256	3.9216e-07	4.32211e-05
THBS4	1.23307	6.50123	4.19329e-08	1.37397e-05
CDH6	-1.41285	4.19822	1.19604e-06	7.62316e-05
PDE4D	1.97864	5.11658	5.39466e-07	4.85432e-05
SKP1	-1.09561	7.70431	3.45668e-07	4.05287e-05
LIFR	1.04698	6.04904	5.46663e-05	0.000995406
BCL6	1.23007	5.21363	4.62343e-08	1.42989e-05
SLC25A36	1.22454	4.83197	8.78249e-06	0.000276987
FGF12	1.56821	4.4912	1.46132e-06	8.59697e-05
CBLB	1.2437	4.44818	1.37871e-06	8.2848e-05
NCBP2	1.03421	6.24737	4.00599e-07	4.35181e-05
UPK1B	1.16016	4.21713	0.000150462	0.00207235
PLSCR4	1.0848	4.00565	3.25394e-05	0.000691748
ADAM23	2.55679	5.00464	1.68122e-08	9.52433e-06
CCL20	1.08474	6.5831	8.32406e-09	8.26854e-06
PECR	1.02424	5.14841	3.78041e-08	1.30203e-05
MSH6	-1.07547	6.56326	1.91137e-07	2.98911e-05
IVNS1ABP	1.34203	5.68991	1.59336e-06	9.09918e-05
SIPA1L2	2.05359	4.55619	4.96107e-07	4.70346e-05
TTR	2.54694	7.43853	2.30245e-09	6.32869e-06
PCDH17	1.09015	4.96168	5.43183e-05	0.000991451
GDA	-1.17273	4.26094	6.72018e-08	1.77112e-05
HDHD3	-1.76274	4.03598	6.77951e-07	5.55343e-05
PGF	1.6794	4.69895	5.16017e-06	0.000194041
IRF2BPL	1.20097	5.04839	1.90281e-06	0.000101623
LGALSL	-1.25625	5.50109	1.19021e-06	7.5944e-05
EPCAM	-2.98365	5.98006	1.88072e-10	2.97324e-06
OGFRL1	1.20958	5.48596	1.67149e-06	9.35555e-05
RCL1	1.33717	4.24499	1.02776e-06	6.9843e-05
EGR1	1.25573	6.24457	4.47713e-07	4.58328e-05
PDLIM2	1.0785	5.23503	6.35095e-07	5.33946e-05
NPPB	-2.03765	7.04734	5.5868e-09	7.20928e-06
CAT	-1.28739	5.85159	1.57479e-07	2.71963e-05
NR4A1	1.42442	4.62827	1.93861e-06	0.000102541
ACSL3	1.74471	8.32696	3.99077e-09	7.20928e-06
CDKN1A	1.64819	6.19658	1.66122e-08	9.52433e-06
SH3TC1	1.28013	5.67795	6.87007e-07	5.60488e-05
GPCPD1	1.04471	5.24987	5.06395e-06	0.000192091
L3HYPDH	1.0006	4.37393	1.08307e-05	0.000320196
RHOT1	-1.23198	4.2149	8.75115e-07	6.33017e-05
ADM2	1.00707	5.52252	1.37905e-06	8.2848e-05
CGNL1	1.06003	5.37381	6.78716e-05	0.00116847
GDF15	1.30637	8.35103	1.56504e-06	9.05231e-05
ASS1	-1.18403	5.78904	1.77101e-06	9.68021e-05
DKC1	-1.10586	6.05868	8.06063e-07	6.10212e-05
DUSP9	-6.15187	7.09304	1.1198e-07	2.27021e-05
RGN	-1.24513	4.97529	3.98427e-07	4.35161e-05
RAB11FIP4	-1.89539	6.59604	8.39359e-11	2.97324e-06
DIAPH1	-1.36695	7.41161	4.34505e-08	1.39297e-05
NDFIP1	-1.3051	6.23086	1.08605e-06	7.24235e-05
NUP210	-1.53748	6.56186	9.60396e-09	8.31662e-06
SERPINF1	-1.46855	5.58306	3.11544e-06	0.000138351
PCED1A	1.03081	5.65798	4.4936e-07	4.58328e-05
PATJ	-1.30319	5.33368	1.88092e-07	2.96071e-05
ANGPTL3	-2.71526	5.43302	1.87942e-08	9.90651e-06
TRPC4	1.15964	6.64891	7.17968e-08	1.82862e-05
BEX1	1.70495	4.30681	1.06718e-06	7.15407e-05
C1QTNF6	1.075	4.60971	4.01451e-07	4.35327e-05
TEX15	-1.35317	4.73859	1.13641e-05	0.0003315
BHLHE40	1.17945	8.82118	1.57013e-07	2.71932e-05
EMP1	2.87807	4.17108	9.87336e-09	8.42948e-06
RTL8C	-1.00607	6.14331	1.77463e-06	9.69124e-05
HOOK1	-1.23158	4.90181	7.09881e-06	0.00023906
TPGS2	-1.97384	4.82691	5.11186e-07	4.75984e-05
PDGFRA	3.07795	5.47005	4.60229e-08	1.42989e-05
COL4A2	3.33752	5.97912	5.13682e-08	1.54915e-05
C9orf40	-1.00752	4.06241	8.80087e-06	0.00027741
GOLM1	1.18496	8.18583	1.51799e-10	2.97324e-06
CCNJL	1.02227	4.62176	7.41473e-05	0.00123825
PRRG4	-1.21304	4.36069	5.66105e-07	4.99499e-05
CPM	-1.22676	6.20484	3.23634e-07	3.92609e-05
NTPCR	1.11603	5.48123	2.70819e-06	0.000126766
SERPINE2	1.76099	5.65894	2.81288e-09	6.32869e-06
DRAM1	1.65501	5.40119	1.13098e-07	2.28521e-05
SPRY2	1.5877	4.08175	4.96167e-06	0.000189277
IGF2BP3	-1.05828	5.82479	2.41502e-07	3.39151e-05
SLC2A8	-1.24629	5.51594	2.74771e-09	6.32869e-06
KIF12	-1.16849	5.57098	1.18385e-06	7.5698e-05
ENPP2	-1.32078	5.76189	4.63169e-09	7.20928e-06
MYC	1.20118	5.68125	1.28253e-06	7.92487e-05
IER3	1.28519	4.54372	8.31455e-07	6.16671e-05
GCOM1	1.13873	4.10675	2.39257e-05	0.000553551
GTF2B	-1.03643	4.26755	2.86973e-06	0.000131385
LOXL4	-1.40976	6.53667	6.48959e-08	1.75845e-05
DUSP5	1.90798	6.77678	1.0816e-08	8.79882e-06
LARP1B	-1.15334	4.05762	1.47042e-05	0.00039509
CLSTN3	-1.01043	7.10789	3.66921e-08	1.29885e-05
PHLDA1	1.90867	6.63272	3.60931e-07	4.16734e-05
DUSP6	2.08953	4.80096	6.05247e-07	5.1915e-05
LUM	1.39531	8.08229	1.75179e-08	9.70915e-06
SLC39A5	-1.46542	5.14087	8.58385e-07	6.269e-05
ANKRD52	-1.11345	6.82308	3.19792e-06	0.000141024
FRMD6	1.28443	4.17048	4.67309e-07	4.58763e-05
NIPA2	1.02485	4.69842	1.27986e-05	0.000358177
PCSK6	1.26728	6.77312	1.02787e-08	8.65367e-06
OSGIN1	1.46026	4.79781	1.87491e-07	2.96071e-05
SSH2	-1.60691	5.48393	5.72242e-08	1.66767e-05
GALNT1	-6.37362	4.03365	4.72372e-09	7.20928e-06
COL6A1	1.37515	6.01516	2.58054e-09	6.32869e-06
SOD1	-1.22165	7.21521	7.44864e-08	1.86975e-05
COL6A2	2.37097	4.83504	7.50808e-08	1.86975e-05
PRDM16	1.00001	5.47722	6.69713e-08	1.77112e-05
SLC44A3	-2.37807	4.24621	2.78928e-07	3.59741e-05
IGSF3	-1.25069	5.94767	1.06651e-08	8.79882e-06
CREG1	-1.88188	4.16579	1.24319e-08	8.96205e-06
ADAMTSL4	1.47771	5.38618	4.07774e-08	1.34337e-05
UBXN4	-1.00159	7.35651	1.68303e-07	2.82605e-05
HES6	1.00858	5.35102	0.000297837	0.00350019
AGTR1	1.1576	4.15581	3.96765e-07	4.34128e-05
EPHA5	2.74403	4.7988	8.30911e-09	8.26854e-06
GC	-1.73388	7.24524	8.17106e-08	1.91835e-05
USP53	1.04676	5.77974	4.57169e-06	0.000178788
SETD7	-1.08035	7.1242	1.99478e-07	3.03052e-05
OSMR	1.26938	5.43038	6.49125e-06	0.000226179
TNIP1	-1.10161	5.5646	7.0552e-06	0.000238121
IGFBP3	-1.0294	9.14103	5.4864e-07	4.89256e-05
EPHA1	-1.73037	4.24967	1.75251e-07	2.87166e-05
SYTL5	1.4636	6.55395	8.12703e-09	8.26854e-06
RADX	1.46388	4.14661	3.37974e-06	0.000145902
GPC3	-1.617	9.6653	6.99523e-09	7.97372e-06
FBXO25	-1.07678	5.62539	1.66127e-08	9.52433e-06
RPL10	-1.3013	9.72237	1.72387e-07	2.8696e-05
PLPBP	-1.01605	5.4215	8.23562e-08	1.91835e-05
GINS4	-1.02695	5.47187	5.07625e-06	0.000192265
GSN	-1.17695	6.63707	4.31048e-07	4.51058e-05
ALAD	-1.32321	6.1132	8.86641e-09	8.26854e-06
GLUD1	-1.19152	10.3927	8.73126e-09	8.26854e-06
PDCD4	-1.26744	4.32261	1.50738e-06	8.81127e-05
VEGFC	1.17049	4.728	3.15095e-07	3.85861e-05
PTS	1.27315	5.19841	4.80577e-07	4.64612e-05
SLC7A11	1.07337	4.77682	4.76358e-05	0.000908602
AKR1C2	1.25873	7.5583	2.33968e-08	1.08492e-05
ITIH2	-2.21068	7.26851	1.12249e-08	8.79882e-06
GABRA2	1.45299	5.53238	1.7957e-06	9.79747e-05
TLCD4	-1.11354	4.62862	2.68764e-05	0.000601168
PSTPIP2	1.36932	4.36386	5.75506e-07	5.04125e-05
PFKM	1.17143	4.07152	5.0634e-07	4.72197e-05
MBNL1	1.04781	6.65405	9.14109e-07	6.52656e-05
KCNJ16	-1.76144	4.79952	6.52706e-08	1.75845e-05
ANKH	1.20411	6.43394	3.22428e-08	1.22922e-05
SLC7A7	-1.66043	6.38968	5.01523e-08	1.52768e-05
XAGE2	1.92442	6.47544	1.62245e-08	9.52433e-06
VBP1	-1.36817	5.54323	1.83519e-07	2.91979e-05
RAB11FIP1	-1.01875	7.19466	3.14126e-08	1.22922e-05
LRP8	1.03703	4.29314	3.34048e-06	0.000144994
TSC22D3	1.43646	6.75709	5.27558e-08	1.57608e-05
TMEM164	1.12213	5.24802	2.0129e-05	0.000489434
DPYSL5	-1.69743	4.1175	1.94746e-07	2.99694e-05
CDC25C	-1.08119	4.72937	1.94815e-06	0.000102777
TSPAN33	-1.43517	4.11338	3.25806e-05	0.000692233
DMTN	-1.17758	7.0213	4.58414e-07	4.58763e-05
APOA2	-1.49644	8.38841	5.00961e-07	4.70971e-05
HK2	1.78584	6.61526	2.50097e-08	1.10658e-05
ABCG1	1.08391	4.24416	8.35425e-05	0.00134648
IER2	1.11307	7.88351	0.000224601	0.00282578
TONSL	-1.1011	4.40759	6.8556e-07	5.60062e-05
EMC10	-3.65994	5.00476	1.2108e-08	8.96205e-06
ASGR2	-1.16001	6.85202	1.03078e-07	2.17217e-05
GBP2	2.09744	4.30491	4.07768e-08	1.34337e-05
FSTL1	1.5999	6.26268	2.79147e-08	1.15898e-05
CCDC141	1.87121	6.03074	7.82844e-08	1.88216e-05
FABP1	-2.89923	4.69482	1.80994e-08	9.70915e-06
TIPARP	1.09386	7.66952	1.71009e-07	2.85831e-05
CCNL1	1.25889	7.15779	7.89854e-07	6.06058e-05
PCOLCE2	1.37287	5.13666	6.86698e-08	1.79421e-05
CXCL5	1.29237	4.54346	8.0471e-07	6.10212e-05
RCHY1	1.29208	4.08049	3.94802e-07	4.33851e-05
RPL39L	1.32224	4.95068	2.47943e-07	3.43925e-05
RNF168	1.08475	5.38669	3.48106e-06	0.000148833
MELTF	1.30903	5.26991	8.46837e-07	6.19563e-05
PGRMC2	-1.07023	5.26752	8.97625e-06	0.000280905
SPRY1	1.97135	4.94317	5.70825e-07	5.01474e-05
ITGA2	1.02308	5.33953	5.683e-06	0.000207522
SPINK1	-1.78593	6.86629	2.40691e-08	1.0888e-05
GRPEL2	-1.03623	4.66058	2.7176e-06	0.000126894
FOXQ1	1.89593	5.35461	5.14663e-09	7.20928e-06
SAP30L	-1.13146	5.22582	2.24488e-06	0.000112461
ZNF704	1.02508	5.07066	6.22535e-05	0.00110082
COL1A2	-1.20528	4.69334	2.28944e-06	0.000113567
PDP1	1.31383	5.16198	7.78924e-07	6.01478e-05
HGSNAT	-1.01606	4.8332	4.76205e-07	4.63341e-05
DEPP1	1.65211	5.71102	5.4149e-07	4.85554e-05
JCAD	1.05215	4.7575	2.56988e-07	3.4711e-05
FUNDC2	-1.73208	5.69322	3.81206e-07	4.25214e-05
CASP7	-1.05976	4.91443	8.25988e-08	1.91835e-05
LIPC	-1.0491	6.54314	4.13833e-06	0.000166621
SPINT1	-1.58135	5.57066	1.1322e-08	8.79882e-06
SEC11C	-1.44338	4.10713	1.56615e-07	2.71932e-05
TUBA1A	-1.12318	4.45777	0.000363063	0.0040846
SEMA6B	-1.41933	5.26478	2.46291e-07	3.42418e-05
SPRYD3	-1.1154	4.63564	9.26511e-06	0.000287717
SLC20A2	-1.01344	7.19073	7.14387e-08	1.82717e-05
NPNT	-1.037	5.3829	1.88335e-07	2.96071e-05
GFM1	1.01667	5.94695	2.0403e-07	3.05783e-05
ATOH8	1.37298	4.74542	5.43177e-06	0.000201504
COMMD8	1.10574	4.10512	2.06335e-05	0.00049842
MECP2	-1.13575	5.28511	3.77925e-08	1.30203e-05
PARM1	1.08836	4.53508	2.92966e-05	0.000642732
MN1	1.18368	5.13165	8.05284e-06	0.000260619
SLC50A1	1.30516	7.52952	1.55787e-07	2.71932e-05
GPRIN1	-1.07536	4.6853	4.50925e-06	0.000177607
SCN9A	-1.01837	6.51878	3.1722e-05	0.000679948
HINT1	-1.00219	7.23168	1.32428e-06	8.09329e-05
PCDH7	3.32618	4.38463	2.41703e-07	3.39151e-05
ROBO1	1.01238	5.22885	7.13276e-05	0.00120638
SLC16A5	1.85488	4.80695	1.75312e-06	9.63751e-05
CD14	-2.44351	5.88012	5.59199e-09	7.20928e-06
CDCA4	-1.2686	4.57417	1.18954e-06	7.5944e-05
MTM1	-1.13117	4.18825	2.40299e-06	0.000117564
JUNB	1.58845	8.30653	4.65864e-07	4.58763e-05
FGG	-1.18341	8.85514	1.36987e-07	2.53162e-05
FGB	-3.40486	8.80592	1.40627e-08	9.22792e-06
CXXC5	-1.12163	6.68144	9.63951e-06	0.000295857
HDAC3	-1.18905	6.32805	1.78808e-07	2.87166e-05
RRM2	-1.13359	6.14455	2.30332e-07	3.30854e-05
ZNF217	1.13534	5.63159	5.65258e-07	4.99479e-05
FRMD3	2.52121	4.36353	1.44074e-08	9.22792e-06
CEBPB	1.06045	5.8975	0.000176399	0.00233773
SPTLC3	-1.26345	4.43582	1.90983e-06	0.000101908
MIR4435-2HG	1.54206	6.36455	5.00137e-08	1.52768e-05
LRRN3	-1.41934	4.59282	2.6203e-06	0.000123858
OLR1	1.17632	5.01518	8.10775e-06	0.000261976
C11orf80	-1.15711	5.37255	2.91278e-07	3.70933e-05
CTSF	-1.15797	5.26999	2.97269e-07	3.73252e-05
FZD4	1.13469	6.76126	2.62363e-07	3.49847e-05
PDZK1	-1.41345	5.57637	1.11151e-05	0.000326595
CLTB	-1.1789	7.0419	4.25653e-06	0.000169526
LONRF3	1.36199	4.65527	1.03151e-06	6.9966e-05
ETV4	1.12765	6.21993	5.52151e-09	7.20928e-06
A2M	2.12831	7.48574	2.99848e-09	6.47007e-06
CSTF3	-1.17205	4.89102	4.31585e-07	4.51058e-05
LPCAT4	1.25061	4.36715	2.30084e-06	0.000113896
DCAF4L2	1.3103	4.61323	6.95307e-06	0.000236209
MYO1D	-2.41754	6.76588	7.10331e-09	7.97372e-06
TCIM	-1.31855	6.6104	1.27543e-06	7.90759e-05
ZBTB38	1.01648	6.8373	7.2997e-06	0.000243928
IRX3	2.0925	4.42883	2.76265e-08	1.15898e-05
RPL10P16	-1.36982	5.4873	1.85237e-08	9.8496e-06
GPR35	1.23231	5.74252	3.10447e-08	1.22922e-05
ADORA2A-AS1	1.1605	5.25378	7.96841e-07	6.06099e-05
TAF7	-1.05447	6.4099	1.67256e-07	2.81941e-05
TMTC2	1.99283	4.12031	1.37728e-06	8.2848e-05
GATA2	1.33536	5.70579	2.43096e-08	1.09154e-05
SEPHS2	-1.12181	8.81669	5.45772e-10	4.04257e-06
TMEM86B	1.23499	4.55916	9.80386e-06	0.000298184
SSTR2	2.93259	4.55715	5.33014e-08	1.57608e-05
SSR4	-1.42508	6.74048	3.41058e-08	1.25296e-05
RAP2B	1.25244	5.95853	2.77085e-08	1.15898e-05
DIPK2A	1.08907	7.81253	5.96298e-07	5.18591e-05
P2RY8	1.30416	4.41651	1.19285e-05	0.000340138
LIMK2	1.0093	5.14366	3.54805e-07	4.12016e-05
PAPPA	-1.30503	4.10195	2.29842e-05	0.000538876
ABAT	1.39804	5.32759	5.88193e-09	7.27643e-06
MX2	1.01082	4.66761	5.20282e-06	0.000195281
MEX3B	1.6915	4.09493	2.96221e-07	3.73252e-05
NPW	1.23373	4.84657	2.23394e-06	0.000112168
IRAK1	-1.11076	6.50151	3.59507e-06	0.000151335
OAF	1.3435	4.57824	6.48352e-06	0.000226129
PRKD1	1.52961	6.34547	7.06844e-08	1.82717e-05
CLDN6	-1.99292	5.7997	8.38274e-07	6.16671e-05
OSBP2	-1.34155	4.79364	2.91663e-06	0.000132722
MAFF	1.14262	7.20898	6.18082e-07	5.27451e-05
BCAP31	-1.5853	6.37451	3.20444e-08	1.22922e-05
ZNF395	-1.00454	5.02587	5.43162e-09	7.20928e-06
TMPRSS6	-2.03135	4.85028	3.4552e-08	1.25799e-05
COL4A1	2.51281	6.06556	7.11823e-08	1.82717e-05
SPRY4	1.69161	5.92308	2.57512e-09	6.32869e-06
H1-2	1.19163	4.77189	5.70027e-06	0.000208027
ARL4C	1.97486	4.37878	1.42292e-06	8.43137e-05
COL4A5	1.06747	6.76692	7.03692e-06	0.000237636
TUBB4B	-1.1485	9.50498	4.49345e-08	1.41943e-05
SLC38A3	-1.27293	4.93343	2.02767e-07	3.05714e-05
IER5L	1.67757	6.00177	9.27624e-06	0.000287768
TSC22D2	1.3162	6.53727	2.61919e-09	6.32869e-06
SLC30A10	-1.80144	4.97392	2.11138e-07	3.12923e-05
DAPK1	-1.46767	7.57234	1.30441e-08	8.98513e-06
FLNA	-1.283	9.33082	4.17129e-07	4.44378e-05
SLC39A10	1.01154	6.37593	5.28173e-08	1.57608e-05
ANXA4	-1.44093	7.53405	8.6342e-10	4.75799e-06
EOLA2	-1.18831	4.13624	1.44526e-07	2.60735e-05
ADARB1	1.00172	4.48172	1.91253e-05	0.000473578
COL4A6	1.26228	5.53249	4.16984e-06	0.000167356
NMB	1.11136	4.17083	6.13275e-05	0.00108997
GRK6	-1.09759	6.20917	1.01163e-06	6.93687e-05
C6orf89	1.07524	6.97264	1.37942e-07	2.54152e-05
SMOC1	1.22009	4.26289	3.64757e-07	4.18326e-05
ALPK2	-3.83183	4.31021	1.74309e-08	9.70915e-06
LTN1	-1.01291	5.7289	4.42662e-07	4.54911e-05
GDI1	-1.05107	5.96231	7.96906e-07	6.06099e-05
MAFB	1.55544	5.3802	1.6422e-06	9.23423e-05
STK38L	1.15939	6.37893	2.55449e-06	0.000121831
ERVMER34-1	2.31133	6.20009	3.75003e-09	7.20928e-06
DHFR	-1.05998	7.0236	2.76791e-08	1.15898e-05
PNMA2	1.42664	4.83154	5.6496e-06	0.000206676
CHCHD10	1.11845	4.72722	2.70739e-06	0.000126766
HCAR3	1.8765	4.2578	9.76704e-08	2.12332e-05
CTXND1	1.22026	4.75908	2.40724e-07	3.39151e-05
ANXA8L1	1.76166	6.25116	6.59615e-07	5.46228e-05
ANXA8	1.22484	4.37635	2.18258e-06	0.00011062
RP11-577H5.5	-1.29092	5.18517	9.73166e-06	0.000296822
SNHG8	1.27352	6.14503	1.18099e-06	7.56745e-05
UHRF1	-1.16196	6.4717	4.24724e-07	4.47747e-05
PCDHGB5	-1.16522	4.94957	2.93339e-06	0.000133293

## Sheet: Huh7 sgCOP1 vs. sgAAVS1
Symbol	log2FC	AveExpr	P.Value	adj.P.Val
CFTR	2.51207	0.616805	0.000304678	0.0138158
ICA1	1.63444	3.18416	1.36345e-05	0.00275202
CD38	1.96009	3.8804	5.69531e-06	0.00179838
PON1	-1.20899	3.26546	2.41073e-05	0.00366244
ITGA3	1.51501	2.79469	0.000197599	0.0109734
CACNA1G	-1.49895	2.01994	0.000230439	0.0117622
SCIN	1.28069	2.49799	0.000114576	0.00823059
GIPR	-1.24157	2.29732	0.000227848	0.0116967
TMEM159	-1.15511	0.717602	0.00158356	0.0370109
MAMLD1	1.1023	5.8628	0.000145228	0.00916919
MTMR11	-2.15805	1.76617	1.89193e-05	0.0033247
ABCC2	-1.2094	5.24568	3.28673e-07	0.00063953
DAPK2	-1.04354	2.65686	4.58751e-05	0.0050843
EPHA3	1.08185	4.26377	3.88191e-05	0.00466037
ADAMTS6	-1.31147	2.15376	0.000137135	0.00894948
LAMA3	2.03444	0.182414	0.00020038	0.0110374
MCOLN3	1.02309	2.96737	4.48771e-06	0.00156366
SPAG4	-1.22037	2.24055	9.95378e-05	0.00764914
SLC6A16	-1.22565	2.61161	0.000431797	0.0170464
LIMCH1	-1.01928	5.30989	1.71441e-06	0.00112993
GLP2R	-1.776	1.37385	2.79447e-05	0.00390787
STAG3	-1.22381	2.11715	0.000833035	0.0251516
NAV3	1.33238	2.75535	5.61572e-05	0.00555742
IFI35	-1.15392	2.47803	5.56806e-05	0.00554629
RASGRP2	2.29814	1.02313	0.000478397	0.018207
RAB27A	1.28542	4.97569	7.12303e-06	0.00198703
LIMS2	1.0339	1.44815	0.000320845	0.0141739
NOTCH3	-1.74271	0.331487	9.09644e-05	0.00732491
PPP2R2C	-1.32907	1.03163	0.000691829	0.0224215
CACNG4	-1.78558	1.97703	0.000146092	0.00916919
FSCN1	-1.06539	5.31245	0.00017314	0.0101224
CTTNBP2	1.1328	3.32147	9.0178e-05	0.00729936
IL4R	1.20896	6.61896	5.11669e-05	0.00533482
FGFR1	1.14089	4.1426	1.82646e-06	0.00112993
MAP2	-1.51292	4.89157	2.48441e-08	0.000325409
AMPH	-1.13607	2.36744	0.000556287	0.0197923
NEBL	-1.47422	1.18295	0.000773871	0.0239509
AFM	-1.53631	0.905213	6.66192e-05	0.00610109
EPYC	1.46049	1.81833	0.000239465	0.0120282
HAL	2.96749	3.8298	3.06305e-07	0.000631392
APOB	1.8148	10.227	1.62969e-05	0.00303078
SNX10	1.48734	3.2978	8.96254e-05	0.00728036
ACHE	-1.08532	0.036802	0.00264743	0.0499637
FER1L4	-1.53332	1.13662	8.93324e-06	0.00224729
SLC15A1	1.35271	1.69378	0.000110512	0.00814935
TESC	-1.05188	4.46983	9.089e-05	0.00732491
SLC23A2	1.41301	5.63473	1.29768e-05	0.00265793
CHGB	2.11685	0.59821	3.72522e-05	0.00456261
LTBP4	-1.08246	3.86886	1.13095e-05	0.0024694
RAPGEF4	1.5885	1.11751	1.44485e-05	0.00283562
PITPNM3	-1.28729	5.50325	5.47058e-06	0.00174663
SLC7A8	2.16426	2.7293	2.30463e-05	0.00357348
COL9A3	-1.54982	5.78388	1.07301e-05	0.0024694
PCSK5	-1.14923	3.05423	4.2546e-06	0.00150844
KCNK6	-1.0859	1.09184	0.00183955	0.0399954
MMP11	-1.05792	4.89169	0.00125892	0.0323545
LGALS1	-1.45119	4.40839	8.75305e-05	0.00720042
TSPO	-1.2665	3.14463	1.41625e-05	0.00282443
NFATC4	-1.39986	2.24519	4.39503e-05	0.00498441
ISM1	1.00987	3.4698	1.95191e-05	0.00341033
PAK5	-1.43836	4.23936	1.24934e-06	0.00102026
GPR143	1.42533	1.42363	0.000175954	0.0102138
SMPD3	1.34402	2.13257	2.23775e-05	0.00353945
COTL1	1.30705	2.04592	3.34552e-06	0.0014063
RHBDL1	-1.20091	1.37427	0.00146306	0.0354095
CRYM	-1.4108	2.52509	3.09413e-05	0.0040972
FZD3	1.95818	0.0668335	0.000124698	0.00859096
EYA1	-1.27889	0.117848	0.000577021	0.0201168
ESRP1	2.29493	3.01632	8.0728e-06	0.00213419
TNNT1	-1.5287	1.61468	0.000640198	0.0214083
APLP1	-1.18356	3.10212	0.000254347	0.0124861
MYH14	1.71377	3.99542	2.84446e-06	0.00135788
ICAM5	-1.58591	0.288908	0.000350806	0.0148938
UPK1A	1.04575	1.67523	0.00121182	0.0316814
CPVL	2.36127	2.46475	8.23163e-06	0.00215094
EPHB6	-1.04382	0.948395	0.000445709	0.0173663
CYP3A5	-1.18553	2.27341	1.13486e-05	0.0024694
TFR2	1.45461	3.65557	2.62043e-05	0.00381032
RARRES2	-1.17161	6.17471	0.000240828	0.0120667
SLC1A1	1.53597	5.31387	4.69133e-08	0.000370242
PRUNE2	2.39697	1.31638	1.27006e-05	0.00262798
MEGF9	1.02298	5.88274	6.28087e-06	0.00190357
C5	1.31673	8.77728	2.04577e-06	0.00118942
CA9	-2.85365	1.195	1.6548e-05	0.00304016
CXCL12	-1.77863	0.279508	6.42609e-06	0.00191918
SPOCK2	-2.31249	3.41888	1.46105e-05	0.00283908
LGI1	-1.87809	0.105911	0.00103804	0.0287235
RGS9	-1.08609	1.8947	8.80367e-05	0.00722246
RASD1	-2.10108	4.79018	1.5822e-05	0.00296062
COL1A1	-1.18884	3.14352	6.95748e-05	0.00615783
SLC16A6	1.7426	1.0223	0.00082994	0.0251195
SLC6A12	2.05914	0.212451	0.000297907	0.0136415
CUX2	1.78523	0.317606	0.000562143	0.019876
COL12A1	2.1309	4.89341	2.08219e-07	0.00061566
MDGA1	-1.99799	5.40428	2.58257e-06	0.001294
RBM24	-1.6796	1.09529	2.9409e-05	0.00400669
TRIM38	-1.01099	1.7365	1.52797e-05	0.00290918
LAMA4	1.25676	2.71279	0.000171282	0.0100656
GHR	1.16788	2.81376	0.00063874	0.0213959
CDH6	-1.37991	4.48796	2.53211e-07	0.00061566
PRLR	1.06968	5.10389	1.82282e-05	0.00326958
PDGFRB	1.46937	1.19462	5.36309e-05	0.00545171
GALNT3	1.87104	1.5242	9.90111e-05	0.00764914
IGFBP2	-1.14849	1.21874	0.00199019	0.0419398
CHST10	1.97946	0.415615	6.64729e-05	0.00609973
IL1R2	1.29678	0.590355	0.000291777	0.0134727
EPAS1	1.14995	8.33715	8.39934e-06	0.00217618
PRG4	2.12687	0.643118	0.000698348	0.0225686
NCF2	-1.20609	2.29496	0.000216119	0.0114089
GBP3	-1.10329	0.90962	0.000938882	0.0271443
SPP1	-1.63035	5.36358	8.92202e-07	0.000932613
GDA	-1.31504	3.38125	4.7234e-05	0.00509147
BSPRY	1.71788	0.911757	5.41331e-05	0.00545171
CSF3R	1.06044	3.21719	0.00022332	0.0115522
ELOVL3	1.96924	2.28596	4.03116e-06	0.00149862
PPP1R3C	-1.42027	1.95391	2.00529e-06	0.00118942
MOB3B	-1.0954	3.14175	4.44834e-05	0.00499425
CCDC170	1.00301	1.20032	0.00101737	0.0283717
PLS1	-1.15957	5.29682	3.93497e-07	0.000662682
ADGRB2	-1.19392	1.73802	0.00131862	0.0333154
TNFSF10	-1.6381	3.89664	1.18028e-05	0.00248747
INHBA	1.5225	2.58278	4.09055e-06	0.00150302
CNTFR	-1.6332	1.00978	0.00160733	0.0372889
NR4A1	-1.07773	2.87663	6.90551e-05	0.00615783
SERPINA7	2.71122	1.67062	3.22292e-05	0.00420206
NRK	2.30558	0.574916	1.13563e-05	0.0024694
C4BPA	1.37313	2.15163	3.59376e-05	0.00445561
SLPI	2.02576	2.44618	2.21547e-05	0.00353945
MT2A	2.24945	1.46172	0.000498842	0.0186154
INSIG2	-1.15646	4.18278	4.73648e-05	0.00509147
AIF1L	1.13964	5.14291	7.60908e-06	0.00205029
TSPAN8	-1.18681	3.27657	2.25987e-05	0.00353945
PTPRB	1.50897	2.23191	0.000548108	0.0196418
LRFN1	1.09015	3.27483	0.000329669	0.0144205
BAIAP2L2	-1.14549	3.90442	8.90793e-07	0.000932613
CD68	1.06455	2.44392	0.00107319	0.0293927
PLPPR3	-1.7711	1.12168	4.58295e-06	0.00156978
FCHO1	-1.01673	0.269894	0.00166813	0.0379773
SMPDL3B	1.56986	3.51025	9.37981e-06	0.00228381
F12	1.26384	3.84264	0.00154553	0.0364191
FMO5	-1.24036	1.66269	7.81806e-05	0.00668526
SLC6A11	1.58263	0.501833	4.99619e-07	0.00073879
DDC	1.72283	4.40683	8.89728e-07	0.000932613
MATN2	1.08887	1.93455	0.000280771	0.0132058
RHBG	1.84163	1.29794	0.000132919	0.008825
MMACHC	-1.8357	4.91771	0.000311475	0.0139828
KANK4	2.0874	0.990462	0.000206234	0.0112004
ANGPTL3	1.36263	2.44012	0.000539618	0.0194967
SLC41A1	-1.09207	1.73003	5.36013e-05	0.00545171
DUSP26	1.97986	0.822346	0.00124254	0.0321502
TSPAN2	-1.23522	1.18325	0.000950618	0.0272497
GSTM3	-1.14466	6.569	6.9879e-06	0.00197049
GRHL1	1.44405	2.57039	0.000178007	0.0102781
EMP1	-1.18346	4.11304	9.30157e-06	0.0022739
MYBPC3	-1.58977	2.18841	9.24176e-06	0.00226842
PDGFRA	-1.26137	5.35458	4.28075e-07	0.000701429
ANXA1	1.14961	2.80685	0.000108848	0.00808718
NT5E	-1.28782	3.73224	8.09646e-06	0.00213419
PPP1R1A	2.34574	2.58734	3.41931e-06	0.0014063
KCNH3	-1.01425	0.490224	0.00102022	0.0284211
MAP7	1.04787	3.31463	0.000241632	0.012081
DYSF	1.44404	3.1949	4.22461e-05	0.00489724
BAAT	-1.68334	2.27064	0.000164854	0.00988828
ENPP2	1.1802	7.46239	9.44038e-06	0.00228937
SLC22A7	-1.39865	0.435655	0.00192843	0.0412455
RNF144B	1.14905	1.47233	3.72058e-05	0.00456261
PAK6	1.25719	0.158787	0.000406265	0.0163985
FAM13A	-1.02723	5.45555	9.2323e-06	0.00226842
ERP27	-1.37348	1.85855	2.67288e-05	0.00384913
LGR5	-1.39559	1.335	0.000882672	0.0261444
FBLN5	1.23494	4.52817	0.000151953	0.00936227
SLC27A2	2.76036	1.19751	4.51886e-06	0.00156551
KSR1	1.46176	1.80843	0.000725433	0.0230387
OSBPL1A	1.37984	1.25126	0.00049572	0.0185176
IGFBP4	1.15391	4.00946	3.13979e-05	0.00412026
MISP3	-1.63638	2.18033	0.000287126	0.0133289
IFITM3	-1.20355	2.7219	2.80925e-05	0.00390787
COL6A2	-1.76451	2.7492	0.000483992	0.0183077
SEMA6C	-1.01513	2.49269	0.000841074	0.0253081
SUSD4	1.80373	2.61526	6.34032e-06	0.00190357
EFNA3	-1.40757	1.0571	0.00124284	0.0321502
PPFIA4	-1.70407	0.829359	0.000819994	0.0249142
GDF7	-1.28429	0.846368	0.000658917	0.0218057
SLIT2	1.14473	5.22269	2.35109e-05	0.00362637
VWA5B2	-1.5477	5.1969	1.22269e-05	0.00255614
GC	-1.91757	7.28364	9.47597e-08	0.00047875
SNCA	-1.21601	3.07969	1.30887e-05	0.00267181
TRIM7	-1.80937	0.595493	6.16285e-05	0.00581081
SLC22A3	-2.28532	0.804685	9.04517e-05	0.00731175
SHROOM2	1.11604	4.89433	0.000102675	0.00782116
CLTRN	-2.18955	1.6035	9.41284e-05	0.00745977
SAA4	2.81493	4.09679	2.41638e-05	0.00366244
LYPD6B	-1.01799	5.32413	2.41264e-07	0.00061566
ITIH2	1.65202	6.87332	3.13826e-06	0.0014063
ACSL1	1.06406	5.74236	2.28125e-06	0.0012132
CCDC74B	-1.10734	2.5612	3.30775e-05	0.00423972
MGAT5	1.57306	7.94056	1.13614e-08	0.000320796
TMEM178A	1.19862	3.53065	5.34035e-05	0.00545171
GJA1	1.23175	9.11184	3.53968e-06	0.00142994
ACMSD	-1.31484	0.134351	2.99438e-05	0.00404901
CD96	-1.07705	0.365818	6.88088e-06	0.00196213
KCTD15	-1.47179	1.85031	0.000745703	0.023423
SEPTIN14	-1.59849	0.0713673	0.00162594	0.0375011
MARVELD1	1.48859	4.18873	3.88107e-05	0.00466037
PPM1J	-1.6388	0.335101	0.00145247	0.0352942
HKDC1	-2.15375	0.525781	0.000296528	0.0136297
CD109	-1.05926	2.22244	0.000123943	0.00856819
ATP2B2	1.35798	5.36484	6.34239e-06	0.00190357
C8A	1.04721	0.638843	0.000874631	0.026006
PWWP3B	2.18698	2.45084	4.19149e-06	0.00150844
TMSB15A	-1.64274	3.36217	2.13165e-05	0.00353945
H2BC5	-1.02449	2.54103	0.000740956	0.0233603
H4C8	-1.33782	1.00508	0.000140698	0.00906491
NBL1	-1.2079	2.21127	0.000106216	0.00797842
CDA	1.65908	2.64145	1.31329e-06	0.00102078
WNT9B	-1.20625	0.539717	0.000732863	0.0231775
RGL4	1.609	2.61192	0.000143458	0.00911358
TFF3	-1.12095	2.88629	0.000934393	0.0270403
IL6R	1.07373	3.34732	6.81333e-05	0.00613981
CYP3A7	-1.29188	1.56322	0.000154565	0.00948352
CCDC116	1.00982	0.0421175	0.000990659	0.0279482
EMC10	1.20533	5.91688	5.67469e-05	0.00557571
IP6K3	2.04227	0.426707	0.0001008	0.00771616
SLC1A7	-1.08031	1.71563	0.000111918	0.00818785
RAVER2	1.21375	0.262752	0.00180979	0.0397131
GFI1	-1.53613	0.265631	0.00101708	0.0283717
CCDC74A	-1.00286	2.02423	0.000905156	0.0265491
S100A9	1.98699	0.913698	0.000378478	0.0157137
TAFA4	1.0813	2.61289	5.39818e-05	0.00545171
SLC22A15	1.29613	2.6165	7.90708e-07	0.000904496
TRIM46	-1.08658	0.550371	0.000358652	0.0151632
DPPA2	-1.23398	1.12055	0.00168485	0.0382288
FABP1	-2.76874	2.68938	1.39297e-06	0.00105565
LRRC2	1.04651	1.22961	0.000391753	0.015983
KLF15	1.49891	2.10769	0.000415504	0.0166276
FAM160A1	1.51473	0.0567865	0.00240803	0.0471245
F2RL1	-1.18234	2.6424	8.82033e-06	0.00222813
GRIK2	2.26538	0.390875	6.83062e-06	0.00196213
BMPER	1.50506	2.52386	1.48289e-05	0.00286316
SHH	-1.00007	2.19239	0.000184166	0.0105533
COL1A2	2.23044	2.23145	3.35831e-06	0.0014063
PHKG1	-1.0528	1.83025	0.00224863	0.045082
MICALL2	-1.10261	3.86846	0.000430284	0.0170357
CTHRC1	-1.63748	1.3739	3.18523e-05	0.00417036
SVEP1	1.16094	2.74561	5.25949e-05	0.0054137
PHYHIPL	-1.26746	2.36325	2.78787e-05	0.00390787
HACD1	1.34444	1.96174	0.000197746	0.0109734
ABTB2	1.16238	0.948652	0.000204037	0.0111443
NNMT	1.61324	1.19029	0.00198237	0.0418764
NAV2	1.44874	5.60694	1.4546e-05	0.00283562
CA4	-1.69009	0.318714	0.00164501	0.0376632
CACNB3	-1.03983	1.99258	0.000375828	0.0156385
ANGPTL4	-1.75241	2.46019	5.94287e-05	0.00570996
RAB26	-1.03537	2.07277	0.000380326	0.0157137
BATF2	1.039	0.164059	0.00238656	0.0468886
BDKRB2	1.44831	1.31314	0.000140036	0.00905114
NPNT	-1.38377	3.72202	1.7357e-05	0.00314121
ATOH8	-1.22036	4.74194	0.000166333	0.00989624
STXBP6	-1.00394	2.99249	0.000818697	0.0248923
NPR1	-2.32257	1.69286	0.000194764	0.0109131
RASSF6	-1.25679	0.768406	0.0023558	0.0465076
GJB1	1.00376	3.79888	1.12206e-05	0.0024694
TM4SF4	-2.15839	1.65637	4.47752e-05	0.00500693
TM4SF1	-1.28089	8.90488	3.28353e-06	0.0014063
ZPLD1	-1.29511	1.30766	0.000119152	0.00836875
FAXDC2	-1.25081	4.03863	3.02718e-05	0.00405141
FOS	-1.41597	3.54184	5.03753e-05	0.00529893
SEMA3E	-1.01027	4.79007	2.08101e-06	0.00118942
KCNS3	-1.23636	0.441286	0.000802847	0.024521
HTRA3	1.89823	2.31127	0.00027341	0.013052
CAVIN3	-1.35428	0.9937	0.000138271	0.0089946
HS6ST2	-1.00311	4.07886	2.25976e-05	0.00353945
FUT3	1.10659	0.083663	0.00196921	0.0417333
SOSTDC1	-1.57327	3.69796	8.55465e-07	0.000932613
CHST11	1.06083	1.27309	0.00175976	0.039152
TPPP	-1.06624	1.27787	0.00248922	0.0481717
MCC	1.36675	4.63033	1.03977e-06	0.00102026
LPAR3	1.20422	1.62172	0.000315645	0.0140504
PTGER4	-1.0785	3.2082	1.14923e-05	0.00247072
FGB	1.35887	9.24758	1.63386e-06	0.00112993
P2RY6	-1.41985	0.0134286	0.000171337	0.0100656
GATM	-1.12049	4.90284	2.39806e-07	0.00061566
SPTLC3	-1.65195	4.27354	1.28374e-06	0.00102026
MAB21L4	1.40952	1.76059	0.00028848	0.0133589
RND1	-1.03512	3.51141	1.68037e-06	0.00112993
FADS6	-1.18997	1.78734	0.00100767	0.0282309
ADH6	-1.25129	1.95696	9.64328e-05	0.00752732
LRRN3	-1.20434	4.33929	1.23552e-06	0.00102026
TRIB1	1.35929	5.53789	2.80729e-07	0.00061566
OLR1	1.48127	3.46928	1.62424e-05	0.00302993
MUC13	-2.61788	1.15254	5.08929e-05	0.00532898
GPR160	1.16219	3.47872	4.67664e-05	0.00509032
CADM2	1.06462	2.22425	0.000637981	0.0213959
GPX2	-1.81522	4.70416	4.8975e-07	0.00073879
RNF152	-1.04703	0.410659	0.000722992	0.0229852
GRIN1	-1.23819	0.74023	2.7153e-05	0.00386112
B3GNT8	1.265	3.05959	0.000277962	0.0131451
PGBD5	1.76563	0.416988	0.000237431	0.0119806
SRRM3	-1.17922	1.84041	0.00126815	0.0325228
MAF	-1.46863	5.10968	8.5767e-05	0.00710355
RFLNA	1.82292	2.97936	0.000132485	0.008825
FOXE1	1.12881	4.1454	0.00021748	0.0114089
PIPOX	1.71748	0.511079	0.000695375	0.0224965
LINC01559	-1.21453	0.813844	0.00129816	0.0330047
PHLDA2	-1.30095	1.58213	0.000948969	0.027234
CLDN7	1.23381	1.67275	2.03808e-05	0.00346778
TMEM30B	1.60457	2.00121	7.35181e-05	0.00641321
CAPN12	-1.50465	3.47817	1.9999e-06	0.00118942
SATB1	-1.04562	3.01736	4.77006e-06	0.00161561
NXPH3	1.18629	1.13105	0.000466089	0.0178506
PAPPA	1.10199	3.72969	0.000293496	0.0135211
HCAR2	1.69599	2.44885	3.44642e-06	0.0014063
C1orf116	-1.29648	1.67366	0.0015018	0.0358767
CRIP2	-1.84603	1.97359	2.15623e-05	0.00353945
ADGRG3	1.96122	0.564983	3.98065e-06	0.00149534
SLC25A18	1.27625	3.85862	6.22777e-05	0.00586062
TMEM121B	1.05388	0.392324	0.00146084	0.035384
GRIN2A	-1.0269	1.71064	0.000492624	0.0184654
TENT5C	1.76691	0.192894	0.000876173	0.0260224
TBX1	-1.44414	1.47616	0.00214675	0.0439552
APOBR	1.17623	2.15887	0.000563534	0.0198867
FMNL1	1.61075	4.24489	5.76203e-05	0.00562535
MANEAL	1.14632	3.04255	0.000510261	0.0188358
LSAMP	1.05102	2.29117	0.00133178	0.0334612
SLC51B	1.58802	2.28249	0.000102533	0.00782116
GNG2	-1.30889	0.612895	0.000162212	0.00978552
CLCNKA	-1.19062	0.353428	6.5657e-05	0.00605873
C1QL4	-1.94172	0.991841	3.4323e-06	0.0014063
C3orf70	1.22608	3.36274	5.98299e-06	0.00186016
LYPD6	-1.05752	4.2794	9.21222e-06	0.00226842
COL4A1	1.19127	5.87121	2.55817e-06	0.00129245
AGMO	-1.24965	1.90045	0.000394661	0.016073
SAMD11	-1.2517	4.77707	9.26835e-05	0.007423
PALM3	-2.34214	1.04717	0.000113892	0.00822015
NUTM2B	1.23685	1.8661	0.00215015	0.043995
SLC38A3	1.35036	4.49869	2.98565e-05	0.00404901
CLDN4	-1.31956	1.25411	0.000131035	0.00881875
S100A14	1.22253	3.76195	2.40208e-06	0.00124471
ZNF681	-1.00447	0.791242	0.000288375	0.0133589
CTSE	-2.56482	1.22711	3.73728e-06	0.00146181
SPTSSB	-2.97762	0.0678534	1.0044e-05	0.00240686
GM2A	1.05102	4.95309	2.56773e-05	0.00377783
ANXA6	1.38863	0.226989	0.000237024	0.0119751
SLC2A10	3.02517	0.355311	1.77239e-05	0.00318857
NRAP	1.05449	0.144574	0.0018449	0.0400325
AKR1B10	-2.38518	3.42903	1.43325e-07	0.00061566
MT1F	1.20916	1.37277	0.00157225	0.0368603
NRARP	-1.08093	2.80733	7.75292e-05	0.00663893
CCDC69	1.76421	4.90257	6.77614e-06	0.00196213
TGM2	1.33625	6.74988	8.22506e-05	0.00689711
GPRIN2	-1.06218	4.98337	0.000119235	0.00836875
SYCE1L	-1.34495	1.87562	0.00167202	0.0380088
ADGRG1	1.06954	4.44622	0.000112069	0.00818785
CCDC183	-1.90243	2.83339	9.55177e-05	0.00750671
UCA1	1.37675	2.32831	7.44446e-05	0.00646612
RP11-465B22.3	-1.21493	1.1191	4.05386e-06	0.00149862
MIR503HG	-1.01204	1.57079	0.00205991	0.0428721
LINC02593	-1.70634	1.61171	0.000455838	0.0176251
C4B	1.16762	1.99716	0.000493485	0.0184796
GTF2H2B	-1.44305	0.754905	0.000830314	0.0251195
CCDC183-AS1	-1.17184	2.65078	1.08937e-05	0.0024694
NUTM2E	1.01469	2.28624	0.00199193	0.0419398
RP11-38L15.2	-1.24648	1.84231	0.00153023	0.0362821
AC002480.3	2.35967	0.582734	0.00102263	0.0284319
AC093388.3	1.03495	0.00688371	0.000941993	0.0271683
SHISA8	-1.18524	0.443478	0.000375743	0.0156385
AC009133.12	-4.04136	5.12308	8.52491e-05	0.00707031
PNMA2	-1.01366	4.75189	0.000157053	0.00958419
PEG10	1.19285	9.80754	2.78427e-06	0.0013397
MBL1P	2.3946	0.270105	0.000133044	0.008825
RP11-24C3.2	-4.76535	2.20741	0.00201458	0.0421892
CFHR1	1.36132	1.16094	0.000543571	0.019565
CASC8	-1.05874	0.949195	0.000713676	0.0227967
LINC01948	-1.0857	1.78018	0.000754379	0.0235995
SMIM31	-1.75195	1.30157	5.29193e-05	0.00543786
LINC01091	-1.01238	1.63821	0.000205101	0.0111722
SHANK3	1.44553	0.357795	3.54468e-05	0.00444935
MALAT1	-1.15891	9.06005	3.87289e-06	0.00148595
C1orf210	1.68135	1.32209	7.10031e-05	0.00626595
SCARNA9	-1.41818	0.548356	0.000777431	0.0239742
HCAR3	1.95446	3.61385	3.69692e-06	0.00145541
HP	3.68323	2.71812	6.90296e-07	0.000820599
MGAM	1.26186	1.25607	0.000273836	0.0130613
RP11-793H13.8	3.1824	1.93486	0.000964846	0.0274757
RP11-483I13.5	-1.11743	0.578541	0.0019432	0.0414678
TMEM178B	1.70729	1.48753	1.82957e-05	0.00327201
HPR	2.62115	1.12412	6.93225e-05	0.00615783
TXNIP	1.18126	2.8765	0.000362625	0.0152567
GATA6-AS1	-1.3064	2.6283	0.000305053	0.0138225
AC138430.4	-1.08777	1.19775	0.000492801	0.0184654
SMIM32	1.47459	2.57012	0.000336474	0.0145516
RP1-178F15.5	-4.32527	0.869013	0.00122737	0.0319035
RP11-182L21.6	1.06361	3.39865	0.00110106	0.0298722
AP000347.2	-1.00868	2.47024	0.0020047	0.0421132
RP11-216L13.19	-1.22633	4.36508	1.1159e-05	0.0024694
USP27X	-1.28932	0.0741403	6.71362e-05	0.00612821
RP11-574K11.24	-1.15829	1.79978	0.00095498	0.0273111
RP11-807C20.3	-1.13007	1.54117	0.000537527	0.0194327
RP11-158H18.2	-1.54898	0.183884	0.000132963	0.008825
CTA-385F2.1	1.10864	4.29539	0.000184885	0.0105845

## Sheet: Huh7 sgDET1 vs. sgAAVS1
Symbol	log2FC	AveExpr	P.Value	adj.P.Val
CFH	-1.91337	2.2801	2.63813e-05	0.00336719
ICA1	1.11241	2.91729	4.24557e-05	0.00417851
CD38	1.41492	3.59997	7.79397e-08	0.000297073
PON1	-1.11857	3.3066	2.72882e-06	0.00125333
ITGAL	1.02681	4.73591	0.000149253	0.00778052
ITGA3	1.85153	2.95429	0.000141474	0.00756691
ABCC2	-1.13502	5.27642	4.09039e-06	0.0015308
AGPAT4	1.22539	2.85381	2.07096e-08	0.000144548
DAPK2	-1.21075	2.57374	0.000270502	0.0112327
EPHA3	1.39845	4.41509	9.21065e-07	0.000833454
KITLG	-1.12201	2.67396	0.000103962	0.00643154
PTPRU	1.00552	5.39111	2.5399e-05	0.00330648
GLP2R	-1.15493	1.68166	3.97541e-05	0.00406656
FGFR2	-1.07607	1.26469	0.00206809	0.0382963
RASGRP2	2.08553	0.914081	0.000779934	0.0207209
GAL	-1.18292	4.39763	0.000339469	0.0125878
LIMS2	1.3438	1.59822	0.000406383	0.0140466
CELSR1	1.06113	6.83089	0.000250048	0.0107424
CACNG4	-1.65898	2.03819	6.44805e-05	0.00503122
PLXNA2	1.00383	3.68933	0.000626234	0.0180022
CTTNBP2	1.03854	3.26727	4.11485e-05	0.00412099
GPR137B	-1.06167	0.310083	0.00141564	0.0301249
MAP2	-1.44899	4.9146	2.58147e-06	0.00124212
AMPH	-1.00691	2.42526	0.000634674	0.0181245
NEBL	-1.56286	1.12421	0.000629626	0.0180569
AFM	-2.14204	0.591515	1.39631e-05	0.00252699
LRP2	1.12251	3.37616	0.00057913	0.0172339
EPYC	1.86304	2.01502	1.95089e-05	0.00297528
HAL	2.10977	3.39416	8.99603e-06	0.00208401
SNX10	1.28136	3.18865	3.62243e-05	0.00392019
SLC23A2	1.33872	5.58978	1.74951e-05	0.00284363
CHGB	1.90873	0.494272	2.55041e-05	0.00330648
LYZ	-1.324	4.16318	1.52733e-06	0.00106939
RAPGEF4	1.30453	0.972905	4.16618e-06	0.0015308
SLC7A8	1.74474	2.51105	8.4556e-05	0.00563958
SORBS1	-1.00344	4.1812	2.09594e-05	0.00304459
PCSK5	-1.38913	2.93269	1.43061e-05	0.00256144
PAK5	-1.50073	4.19778	2.34779e-05	0.00321309
GPR143	1.29539	1.34849	6.43874e-05	0.00503043
CRYM	-1.17081	2.63845	1.84735e-06	0.00111992
CKM	1.35545	0.107529	0.000650278	0.0184299
CCNP	1.13317	1.08492	0.000522812	0.0163108
MYH14	1.66362	3.96253	1.38296e-05	0.00251894
UPK1A	1.66416	1.97751	2.09893e-05	0.00304459
CAV1	-1.14445	2.66116	1.28611e-05	0.0024443
CPVL	1.19264	1.87386	0.000286472	0.0115821
EPHB6	-1.09289	0.926672	0.00282362	0.0464351
CYP3A5	-1.38642	2.17709	0.000585382	0.0173375
TFR2	1.36583	3.60462	2.09913e-05	0.00304459
SLC1A1	1.4561	5.26757	1.33406e-08	0.000144548
PRUNE2	1.66674	0.940418	1.56884e-05	0.00270211
CXCL12	-1.57277	0.381497	4.67742e-06	0.00161124
UNC5B	1.80182	4.34225	2.29457e-06	0.00120347
SPOCK2	-2.08238	3.52635	3.30198e-05	0.00374185
P2RX1	1.07452	1.78894	0.00137103	0.0294548
RASD1	-1.43539	5.1187	1.70566e-06	0.00109112
HPX	1.12315	6.26697	4.60034e-06	0.00159374
ENO2	1.01681	2.42603	0.000115936	0.0067329
COL12A1	1.76661	4.70484	2.13572e-07	0.000522458
RBM24	-2.0481	0.903741	8.88395e-05	0.00581966
VNN2	-1.0185	2.66551	0.000855601	0.0220049
B3GAT2	-2.27538	2.29241	0.00304752	0.0488013
CDH6	-1.50636	4.41803	5.31726e-09	0.000144548
PDGFRB	1.16247	1.03734	0.000175142	0.00855628
KNG1	1.16552	6.9369	3.47269e-08	0.000178815
AMOTL2	1.13642	7.94861	5.06219e-05	0.00450677
UPK1B	-1.14414	3.32879	7.68496e-06	0.00190579
EVA1A	1.21099	1.15311	0.00053879	0.0165515
IGFBP2	-1.41759	1.07891	0.00118057	0.0269039
EFHD1	1.53747	2.4732	9.27854e-06	0.00212276
CHST10	1.23314	0.031223	0.00201162	0.0375547
IL1R2	1.02658	0.450778	0.00230409	0.0409415
QSOX1	-1.02095	5.59644	1.77363e-07	0.000522458
GBP3	-1.2633	0.827237	0.000708049	0.0194604
PLPPR4	-1.34641	0.879681	0.00113963	0.0262809
ARG1	1.25522	1.77903	0.000138491	0.00749668
ABCG2	-1.7289	0.284099	0.00157767	0.0321776
SPP1	-2.10267	5.12077	2.11626e-07	0.000522458
GDA	-1.94652	3.05485	8.10523e-07	0.000779993
CSF3R	1.71045	3.53479	2.76e-05	0.00343595
ELOVL3	1.78115	2.18522	3.15125e-07	0.000527922
PPP1R3C	-1.3957	1.95676	3.57791e-06	0.00145583
CCDC170	1.09259	1.23525	0.000846977	0.0218683
KCNJ5	1.0068	1.91011	0.00238296	0.0419034
EGR1	-1.03507	4.29314	7.0512e-05	0.00521333
PLS1	-1.06045	5.33954	6.92687e-07	0.000737597
TNFSF10	-1.48762	3.96271	1.04386e-05	0.00219891
CXCR4	1.07128	3.06517	7.04572e-06	0.00187167
INHBA	1.71365	2.67089	2.49313e-06	0.00122887
CNTFR	-1.35618	1.14264	0.000794854	0.0209794
SERPINA7	2.4875	1.5533	1.4407e-05	0.00256144
NDP	-1.44099	1.33434	0.000116414	0.00673458
H2BC11	-1.01963	1.12404	0.000244841	0.0105953
EREG	-1.09427	2.0075	4.50996e-05	0.0042879
SOX21	1.02423	5.241	8.9003e-05	0.00582091
GRIA3	1.14324	3.96439	2.97716e-06	0.00133379
AIF1L	1.38837	5.26121	2.69391e-06	0.00125333
TSPAN8	-1.22022	3.24999	7.16439e-06	0.00187167
WFIKKN1	1.13029	1.43831	0.000230863	0.0101901
LRFN1	1.36086	3.40441	4.48428e-05	0.0042879
FOXJ1	1.06617	2.97982	0.000524552	0.0163198
SMPDL3B	1.49631	3.46698	1.01074e-05	0.00218485
FMO5	-1.05909	1.74579	0.000394	0.0137811
DDC	1.13739	4.11031	2.44341e-05	0.00327736
RHBG	1.9065	1.32037	0.000113139	0.00665305
KANK4	1.914	0.898025	0.00146709	0.0308089
NTS	-1.25656	7.71684	1.94302e-05	0.00297528
DUSP26	1.90217	0.779938	0.00176887	0.0346388
HMGCS2	-1.25553	2.39588	3.08622e-05	0.00361212
EMP1	-1.37863	4.01145	5.87214e-06	0.00171159
COL4A2	1.36205	6.66551	2.38601e-06	0.00121952
NT5E	-1.70076	3.51654	1.26833e-06	0.000985834
PPP1R1A	1.82931	2.323	1.27403e-05	0.0024443
BAAT	-1.01903	2.59615	0.000169714	0.0084156
ENPP2	1.12001	7.42538	3.47866e-07	0.000527922
SLC22A7	-1.05058	0.605469	0.00136198	0.0293652
HCN4	1.10956	4.12299	8.97393e-05	0.00585643
BMPR1B	-1.11352	0.193318	0.000467248	0.0151648
ERP27	-1.24471	1.91018	8.16736e-05	0.0055578
COL2A1	1.37836	0.426925	0.000315512	0.0120457
LGR5	-1.2451	1.39859	0.00280942	0.0462844
FBLN5	1.19098	4.49911	4.37128e-05	0.0042338
MYLK3	1.26864	3.7064	1.11073e-05	0.00225218
KSR1	1.38353	1.7625	0.000312626	0.0120008
ERBB2	1.02151	6.836	6.26785e-06	0.00176745
IGFBP4	1.43731	4.14464	7.67533e-06	0.00190579
LMTK3	1.07225	1.10335	0.000152678	0.00787111
ADAMTS10	1.63166	2.72495	4.01947e-05	0.00406873
ADAMTSL4	1.29835	5.6532	3.48854e-05	0.00382459
SUSD4	1.59736	2.50487	4.22447e-06	0.00153363
AHSG	1.50922	7.64564	2.41292e-07	0.000522458
GC	-1.93679	7.26863	1.87996e-08	0.000144548
SNCA	-1.10863	3.123	2.01884e-06	0.00117619
TRIM7	-1.1205	0.941201	0.00113267	0.0261745
PRSS35	1.00049	2.07534	0.000530619	0.0163839
SLC22A3	-2.45225	0.72622	0.000267788	0.0111691
SSC4D	1.39655	3.70742	7.98064e-07	0.000779993
SHROOM2	1.15269	4.90412	0.000228908	0.0101299
CLTRN	-2.18672	1.59922	5.08048e-05	0.00450677
SAA4	2.14375	3.75543	2.38021e-05	0.00325
DUSP15	1.47987	1.05197	3.4042e-05	0.00379387
MGAT5	1.2802	7.78752	1.20965e-08	0.000144548
TMEM178A	1.4996	3.67478	5.40784e-06	0.00167241
SLC5A10	1.09772	1.20331	0.000159393	0.00806997
PLCL2	-1.2444	2.55763	2.67091e-05	0.00337221
MARVELD1	1.00587	3.94202	4.28556e-05	0.00419742
CLIC2	-1.10563	0.648493	0.00031711	0.0120839
MMP16	1.0265	3.37127	1.02327e-05	0.00218744
HKDC1	-2.65143	0.287476	0.00135701	0.0293178
CD109	-1.1613	2.15876	0.000187205	0.00897206
ATP2B2	1.35144	5.35343	5.6076e-06	0.00167923
PWWP3B	1.75052	2.22604	9.86837e-06	0.00216974
AFAP1L1	1.12403	3.49272	5.96206e-08	0.000258187
CYP3A7	-1.03777	1.67276	0.000819649	0.0213549
CYGB	1.31089	1.72158	0.000156802	0.00800835
IP6K3	1.7014	0.250566	7.87216e-05	0.0055056
BICDL2	1.17421	0.299255	0.00158813	0.0322968
GFI1	-1.46031	0.307861	0.00158112	0.0322106
REL	-1.10934	2.66182	2.97226e-05	0.00354026
KCNJ3	-1.83263	0.366624	0.000236827	0.0103669
NIPAL1	-1.045	2.24051	1.25039e-05	0.00244047
TAFA4	1.50941	2.82116	4.90205e-06	0.00162266
DPPA2	-1.1036	1.18628	2.5662e-05	0.00331211
FABP1	-2.09553	3.02489	4.35939e-05	0.0042338
KLF15	1.57556	2.13648	0.000541316	0.0165762
CMBL	-1.42565	0.329853	0.000195698	0.00920607
F2RL1	-2.05311	2.19651	3.77417e-06	0.00149849
SPINK1	-1.24751	6.03161	0.000258171	0.0109226
GRIK2	2.05467	0.277034	0.000111662	0.00660709
HEY1	1.04728	0.145801	0.000350024	0.0128223
COL1A2	1.84296	2.0319	4.41758e-06	0.00155479
SVEP1	1.16742	2.74026	0.000173894	0.00853465
PHYHIPL	-1.20622	2.38882	0.000277721	0.0113805
HACD1	1.37798	1.97491	0.000207739	0.00952692
DCHS1	1.53347	4.54651	5.98984e-05	0.00484791
NAV2	1.25989	5.50435	6.28661e-05	0.00497676
GPRC5B	-1.12332	7.2611	3.33477e-07	0.000527922
CA4	-2.04271	0.137847	0.00199042	0.0372908
VASN	1.29655	4.35436	0.000243613	0.0105911
BDKRB2	1.41078	1.29292	0.000815263	0.0212864
CAVIN2	-1.03711	1.8019	0.000740021	0.020047
NPNT	-1.21182	3.79895	3.03092e-05	0.00356115
STXBP6	-1.05847	2.95913	7.03286e-05	0.00520835
B3GALNT1	-1.33334	0.757649	0.000269978	0.0112186
NPR1	-1.566	2.06332	0.000242783	0.0105742
RASSF6	-1.64713	0.566533	0.00168944	0.0336034
MUC3A	-1.20707	4.68635	9.94033e-06	0.00217564
TM4SF4	-2.39594	1.52507	8.64053e-06	0.00205431
TM4SF1	-1.14227	8.96926	7.76276e-06	0.00190579
ZPLD1	-2.77031	0.565043	4.4228e-05	0.00426297
FOS	-1.22412	3.63266	1.44691e-06	0.00105689
HTRA3	2.71382	2.71487	4.75615e-06	0.00162266
HS6ST2	-1.53054	3.81178	5.65034e-06	0.00167923
NRTN	1.06166	2.44996	0.000568016	0.0170734
FUT3	1.18662	0.112158	0.00109636	0.0256533
PTGER4	-1.08245	3.19417	0.00251669	0.0432614
TMEM51	-1.04826	2.2385	0.0004478	0.0148192
SPTLC3	-1.74732	4.21619	6.70381e-06	0.00184742
LRRN3	-1.75727	4.05601	1.75002e-07	0.000522458
SYT12	1.04061	5.39777	2.58787e-07	0.000522982
OLR1	1.49879	3.47435	4.37569e-05	0.0042338
MST1	1.26321	3.82905	2.28943e-06	0.00120347
MUC13	-3.27611	0.816518	3.86358e-06	0.00149849
ZG16	-1.43251	1.75514	2.05104e-05	0.00303288
CADM2	1.06795	2.21742	0.000430729	0.0144996
GPX2	-2.4837	4.36215	8.81174e-08	0.000314252
RNF152	-1.54018	0.168284	0.000670546	0.0188209
RFLNA	1.94975	3.03631	1.22762e-05	0.00243225
FOXE1	1.09193	4.12071	8.09387e-05	0.00555098
ALOX12B	1.2287	1.07151	0.000119021	0.00679461
PIPOX	1.07233	0.18423	0.000604992	0.0176851
B3GNT3	-1.50807	1.31276	0.000495636	0.0157242
FGD6	-1.02881	3.7343	3.01554e-06	0.00133379
CLRN3	-1.07613	1.47106	0.00300523	0.0483412
CHST13	1.00328	7.00515	4.75781e-05	0.00441508
LINC01559	-2.17807	0.332301	5.80424e-05	0.00477658
TEX19	1.01955	0.42491	0.0002168	0.00977243
NXPH3	1.62107	1.34072	9.53487e-05	0.00609137
TSPAN10	1.02914	1.38982	0.00293285	0.0476446
PAPPA	1.31881	3.83057	2.39807e-05	0.00325741
HCAR2	1.47154	2.3271	5.75334e-05	0.00474832
ADGRG3	1.90795	0.525846	0.000530981	0.0163839
SLC25A18	1.41306	3.92047	5.73564e-06	0.00168803
PRR36	1.13791	3.53029	0.00305348	0.0488367
SYNDIG1L	1.23718	0.991364	1.94775e-05	0.00297528
PNMA3	1.0546	0.904511	7.76435e-06	0.00190579
TBX1	-1.09747	1.64629	0.00241329	0.0421787
PCDH9	-1.45324	3.4734	5.15329e-06	0.00162266
CCSER1	-1.30821	0.57522	6.58429e-06	0.00182679
APOBR	1.12485	2.13112	0.00150441	0.0312569
FMNL1	1.57173	4.21733	5.98579e-05	0.00484791
USP18	-1.04529	1.49878	0.0010581	0.0250486
IRS2	1.31649	6.04507	1.32942e-05	0.00246764
GNG2	-1.71877	0.406943	0.000201565	0.00937859
C3orf70	1.05973	3.2713	1.49992e-05	0.00262062
COL4A1	1.52102	6.02799	6.58749e-06	0.00182679
AGMO	-1.11526	1.9601	6.56619e-05	0.00504192
PALM3	-1.07857	1.67912	0.00244465	0.0425162
SLC38A3	1.297	4.46449	1.61761e-05	0.00273347
CTSE	-2.8721	1.08279	0.000100229	0.00627749
ZNF569	-1.16064	0.895291	0.00242282	0.0422558
SPTSSB	-2.88586	0.103584	3.80937e-06	0.00149849
DAPK1	1.31618	7.2533	1.43744e-05	0.00256144
CD47	-1.04222	3.14114	9.61987e-05	0.00611346
OGDHL	1.6516	0.977286	0.00054341	0.0165888
AKR1B10	-3.52809	2.85087	2.40195e-08	0.000145623
CCDC69	1.2951	4.66215	7.27771e-06	0.00187167
SOWAHA	-1.27775	2.39438	0.00127646	0.0282747
TGM2	1.15672	6.65321	2.82636e-05	0.00348484
SP5	1.16049	4.40131	4.86922e-06	0.00162266
MIR1915HG	1.05822	1.68845	0.00117237	0.0267812
TMSB4X	-1.04946	3.31339	0.000237224	0.0103768
MEF2B	1.09621	3.59685	0.00308947	0.0492261
UCA1	1.04345	2.15866	0.000241842	0.0105407
AC129492.6	1.37342	1.59515	1.17655e-05	0.0023698
APOL6	-1.59949	0.55082	0.00012286	0.00694833
LINC01124	1.36358	0.406397	0.00077116	0.0206052
UPK1A-AS1	1.88186	1.93722	0.000384668	0.0136461
SOX21-AS1	1.13983	4.26286	0.000194393	0.00918586
NUTM2E	1.00938	2.27648	0.000724833	0.019777
NKX1-2	1.89401	0.347918	0.000235262	0.0103199
IMPDH1P10	1.07843	1.40417	0.000277264	0.0113805
RP11-332K15.1	-1.05178	2.16403	0.000625863	0.0180001
AC002480.3	2.03847	0.416311	0.00100971	0.0243693
SSR4P1	1.02841	1.63951	0.000301171	0.0118408
APOBEC3G	1.0032	1.46039	0.000100648	0.00629072
TM4SF1-AS1	-1.11201	0.271972	0.000350999	0.0128425
MBL1P	1.93731	0.0363137	0.000172038	0.00847982
ZNF585B	-1.2103	1.00209	0.000433928	0.0145669
SMIM31	-1.71218	1.32037	3.5144e-05	0.00384069
SHANK3	1.93296	0.591035	0.000934562	0.0232402
MALAT1	-1.10685	9.07923	2.61719e-06	0.00124692
C1orf210	1.21425	1.08246	0.000567611	0.0170719
HCAR3	1.47602	3.36882	3.036e-06	0.00133379
RP11-324E6.6	1.12855	1.19954	0.000571864	0.0171296
HP	2.81486	2.27592	3.13751e-06	0.00133984
RP11-793H13.8	3.72889	2.19203	0.00262929	0.0443905
GALNT4	-1.14198	3.76824	3.64123e-05	0.00392019
RP11-1143G9.4	-1.16645	0.573553	0.000992174	0.0240961
SLC22A31	1.7072	2.22412	0.000403368	0.0139903
RP1-140K8.5	-1.28893	0.513601	0.00107042	0.0252613
RP11-297L17.2	-1.07456	0.27134	0.000463401	0.0150815
RP11-195F19.30	-1.1894	0.518575	0.000335851	0.0124918
TMEM202-AS1	-3.75859	1.37086	1.06672e-05	0.00219979
RP11-21L23.2	1.23675	0.233631	0.00221162	0.0398466
HPR	2.34973	0.978813	0.000174102	0.00853465
SMIM32	1.37656	2.51441	7.29854e-06	0.00187167
RP11-182L21.6	1.08855	3.40555	4.74139e-05	0.00441508
RP11-102N12.3	1.4877	0.816501	3.5159e-05	0.00384069
RP11-158H18.2	-1.1153	0.391353	0.000451879	0.0148691
CTA-385F2.1	1.01984	4.2454	0.000159013	0.00806058

## Sheet: Huh7 sgPLXNB2 - LVT vs. DMSO
Symbol	log2FC	AveExpr	P.Value	adj.P.Val
CFH	1.21602	3.08649	0.000152352	0.0198227
CALCR	1.35684	2.06789	0.000764004	0.0448327
PRSS22	2.16567	3.11791	7.18255e-05	0.0141682
CRLF1	-1.15759	3.23296	1.58958e-05	0.00733806
CACNA1G	-1.29525	3.18528	0.000316543	0.0291388
DLX6	-1.24035	2.15327	1.04343e-05	0.00643188
E2F2	-1.0872	4.14267	0.000618364	0.0400991
NME1-NME2	-1.46146	5.34455	0.000129342	0.0181851
CLDN11	1.26395	0.171031	0.000192477	0.0217323
CD74	1.65359	0.155288	0.000251314	0.0255238
BIRC3	2.56414	0.693958	0.00014708	0.0193443
RTEL1-TNFRSF6B	-1.43321	4.33491	0.000384664	0.0315601
DNAH5	1.34679	2.42039	8.99482e-05	0.0154497
TNC	1.61816	2.7535	0.000110696	0.0171241
GUCA2B	1.51757	0.194837	0.000378626	0.0314048
PRSS8	2.85734	1.76981	0.000222805	0.0238256
LAMA3	3.45589	1.59299	0.000131524	0.0182903
SLC2A3	1.71629	8.76926	2.39344e-05	0.00795088
CDH3	2.10918	1.05618	1.56648e-05	0.00733806
CCN5	2.97142	1.14243	0.000774958	0.0452671
CDON	1.32862	2.15537	0.00016317	0.0201493
COL17A1	2.0244	0.728474	0.000331013	0.0296017
MYO9A	1.01484	2.04823	0.000719753	0.0434662
TESK2	1.02999	2.42542	0.000444972	0.0342815
CYBRD1	3.57911	0.72734	0.000316007	0.0291388
PTGS2	1.68944	1.39347	1.74711e-05	0.00733806
CDHR2	2.27876	2.75559	2.04984e-06	0.00335909
FOSL2	1.29511	5.76787	7.69393e-05	0.0144038
CAPN6	3.28768	0.080748	0.000271068	0.0267678
COBLL1	1.15401	4.86668	0.000280385	0.0273317
SEMA5B	1.49231	4.36288	1.31643e-05	0.00682205
ULK2	1.0192	3.60096	0.000437281	0.0340031
HAL	1.81104	0.951252	0.00012093	0.0177107
PTHLH	1.72939	2.80166	2.49141e-05	0.0079768
SLC15A1	1.46378	1.96419	4.14914e-05	0.0104821
TESC	-1.5953	2.75422	1.82044e-05	0.00733806
FXYD3	1.78666	4.82017	4.09436e-05	0.0104312
LAMB1	-1.02127	8.40706	7.44629e-05	0.0143121
CDC45	-1.4689	4.86257	1.16943e-05	0.00650005
SMIM24	1.49663	2.86511	0.000934497	0.0497061
MCM5	-1.18546	6.94187	6.80423e-05	0.0138907
APOL1	2.74842	0.233894	0.000916725	0.0492319
CCDC198	1.42643	3.64776	2.22638e-05	0.00782095
SIX4	1.22353	0.131697	0.000522826	0.0366981
MYBL2	-1.26376	7.56225	5.35944e-05	0.0118736
SALL4	-1.09325	1.92975	0.000532806	0.0370047
BIRC7	2.62431	2.67758	1.45257e-05	0.00718401
TLDC2	2.18519	1.048	4.40156e-05	0.0107669
E2F1	-1.00169	6.72131	0.000310918	0.0289425
FGF14	1.34934	0.00288865	0.000421293	0.0333036
MSLN	3.25331	0.261819	3.06039e-05	0.00887837
FA2H	2.40072	0.158806	1.29906e-06	0.00294913
FZD3	2.78899	1.37989	3.20133e-05	0.00919919
ESRP1	1.75665	5.57704	8.92678e-07	0.00294913
ASF1B	-1.16209	5.57373	9.77257e-06	0.00610856
MYH14	1.38691	5.81959	3.5622e-06	0.00405575
CAV1	1.04172	7.1311	0.000441106	0.0340703
TSPAN12	1.26914	4.9769	0.000111164	0.0171241
SERPINE1	1.25266	7.53912	0.000162197	0.0201112
AGR2	1.8767	2.0414	0.000178422	0.0211704
ATRNL1	3.22058	0.935953	0.000277782	0.0272532
KRT23	1.46858	3.27218	0.000312063	0.0289425
ALDH3A1	-1.07395	0.426391	0.000711327	0.0431541
CPE	1.15245	4.65726	0.000291876	0.0279408
ALDH2	-1.02382	6.1849	0.000153249	0.0198543
ACRBP	1.43716	0.532386	7.9004e-05	0.0145819
MDGA1	-2.19009	7.12909	0.000143948	0.0190362
ENPP5	3.35099	0.638971	7.89368e-06	0.00566376
THBS4	-1.21969	1.33184	0.000230991	0.0244851
TFCP2L1	2.16485	1.60643	8.66395e-06	0.00583681
GALNT3	2.43007	4.19641	2.57642e-05	0.00805028
QPCT	1.27859	1.62073	8.28632e-05	0.0148769
AGMAT	-1.0297	4.01825	0.000851432	0.0477117
GBP3	1.55127	2.52039	4.0663e-05	0.0104312
CDK18	2.52896	1.04448	0.000112344	0.01715
ID3	-1.12167	8.01709	0.000280104	0.0273317
IRF6	2.0961	2.8262	1.69911e-08	0.0010302
CNR1	1.1138	2.28553	0.000145213	0.0191404
AKAP7	1.55108	3.69041	0.000531965	0.0369886
GDA	2.40253	3.92533	8.50939e-05	0.0151078
BSPRY	1.3597	3.68016	7.10372e-06	0.00566376
SMAD9	-1.10285	3.69304	0.000765303	0.0448327
TBX2	-2.17858	5.29128	0.000683552	0.0422478
INHBA	2.92126	3.36762	0.000179846	0.0212439
ZWINT	-1.05141	7.00563	1.13025e-06	0.00294913
ITIH5	1.41541	2.14699	5.22263e-05	0.0118599
KCNS1	1.79354	0.423778	0.000483285	0.0360425
IQSEC2	1.40509	2.81921	1.39576e-06	0.00294913
SRMS	1.7962	0.955956	4.5759e-06	0.0046241
SDCBP2	1.86491	4.16556	4.48661e-05	0.0108813
BFSP1	-1.05929	2.84198	2.71646e-05	0.00819883
ASPHD2	1.76239	1.16749	1.9425e-05	0.00759855
KRT17	3.15472	6.39032	4.23366e-05	0.0105636
IRF5	2.53258	0.0451602	0.000745152	0.0441211
FEZF1	2.26226	0.862446	9.61776e-06	0.00609027
TMOD2	2.59934	0.18701	2.82405e-05	0.00839352
PIMREG	-1.17838	5.36009	0.000124421	0.0178343
FOXA1	-1.24483	5.14248	0.000377099	0.0313638
EGLN3	1.67943	6.88401	6.83684e-05	0.0139104
ACE2	1.22059	1.67186	0.000324107	0.0292865
RSPH3	1.10274	3.9891	4.90427e-05	0.0114465
FCHO1	2.08356	1.45715	8.60175e-05	0.0151171
H19	1.80828	9.33044	0.000109944	0.0170926
AKAP12	1.23596	4.67288	8.52986e-06	0.00581104
LIN28A	2.74397	1.93744	1.22138e-05	0.00650005
NES	-1.11764	8.55493	1.66756e-05	0.00733806
TRPC4	-1.23016	4.48558	0.000362568	0.0307889
SLC2A11	-1.03824	3.28596	0.000612095	0.0400012
HMGCS2	1.18235	2.41187	0.000338213	0.0300242
GRHL1	1.19183	3.10966	3.61213e-06	0.00405575
NAV1	2.22595	0.930321	6.87822e-06	0.00566376
MYBPC3	-3.04005	2.43865	3.41783e-05	0.00959399
ETS1	1.63937	3.49602	0.000246365	0.0254563
ANKRD6	1.37969	2.33945	0.000176426	0.0211704
MAP7	1.00181	4.83675	7.24716e-05	0.0141899
TEC	1.10981	0.184422	7.19721e-05	0.0141682
RPL13AP25	1.15994	1.14607	0.000878593	0.0482963
FXYD2	2.77037	2.23808	0.000154724	0.0199185
SQOR	1.65199	3.12142	7.93012e-07	0.00294913
SMAD6	-1.54152	7.65546	0.000289512	0.0278188
STRA6	1.56901	4.08213	0.00011675	0.0173499
GIPC2	1.12062	2.88347	7.70319e-05	0.0144038
BMPR1B	2.35397	0.312901	0.000139399	0.0188662
B4GALNT3	1.69834	3.20514	0.000356591	0.0306081
MBNL2	1.00735	6.09755	3.69784e-05	0.0100994
KSR1	1.49563	4.09447	0.000114731	0.0172614
OSBPL1A	2.41833	2.4115	2.63222e-05	0.00810137
SLC13A5	-1.39359	4.39567	0.000141153	0.0188902
TNFRSF11A	1.66855	0.471678	0.000242546	0.0253116
SLC47A1	-1.88157	2.58028	3.54543e-05	0.00986085
FAM71E1	2.3045	0.903826	0.000132861	0.0183621
MYOM3	2.38715	0.59539	0.000836464	0.0472525
CNKSR1	1.70501	3.8167	3.99593e-06	0.00425055
IL22RA1	1.4045	2.27913	2.03091e-05	0.00768377
LHX9	1.5009	4.94298	7.19673e-05	0.0141682
RORC	3.00925	0.555173	0.000259947	0.0261378
VWA5B2	-1.74477	5.22232	0.000848402	0.0476262
OSMR	1.21196	5.69296	0.000489727	0.0361902
IGFBP1	3.62188	2.11181	4.80908e-06	0.00474315
CLTRN	1.1936	5.40582	4.59294e-05	0.0109637
SYTL5	-1.92668	4.59063	3.83381e-05	0.0103312
SLC39A4	2.46032	2.41708	8.92836e-07	0.00294913
UGCG	1.05308	7.98479	0.000199121	0.0222751
ANKRD1	1.06752	7.81674	0.000129568	0.0181851
MPZL2	1.1163	4.80227	1.45737e-05	0.00718401
PDCD4	1.21257	5.50021	0.000123113	0.0178343
FAM160B1	1.16517	4.89142	0.000239305	0.025103
SAV1	1.0689	4.33582	8.22027e-06	0.00566376
SPEF2	1.52683	2.50361	8.189e-06	0.00566376
GPD1L	-1.14923	6.25639	0.000191861	0.0217032
RASGRP3	1.24531	2.30837	2.66855e-05	0.00813064
DNAI4	1.06554	2.88238	4.91499e-06	0.00474315
PTPRR	2.14953	1.18847	0.000123257	0.0178343
PLA2R1	1.02801	1.74969	0.000358131	0.0306081
ABI3BP	2.03492	1.11742	0.000112921	0.0171595
RAB6B	1.36987	5.02457	1.33521e-06	0.00294913
HKDC1	2.12494	3.35286	3.75716e-06	0.00414189
CD109	2.17684	1.72285	0.000149926	0.0196335
UBE2L6	1.05371	3.14356	0.000885106	0.0483911
FBXO32	1.21364	2.00981	0.000320655	0.0292101
XDH	1.38712	0.361698	0.000248589	0.0254563
CDA	1.95103	4.19868	0.00013594	0.018522
C1R	1.33152	3.13953	0.000544614	0.0374388
TNFRSF13C	-1.54747	2.53163	1.71059e-05	0.00733806
ABCG1	1.0126	1.0985	4.55737e-05	0.0109218
ITGA5	1.10335	7.34432	0.000514809	0.0364223
JOSD2	1.38329	4.16526	1.6295e-05	0.00733806
SYCE2	-1.38091	1.44681	0.000342015	0.0301411
GBP2	1.17434	2.93009	0.00025919	0.026105
CADM3	1.58545	1.89912	1.82828e-05	0.00733806
ATF3	1.57288	6.43044	0.000114026	0.0171981
CAPN2	2.52274	5.42749	6.3168e-05	0.0132069
FBXO41	1.24632	3.29419	0.000858408	0.0478813
CDC42EP3	1.41492	2.33305	5.84615e-05	0.0126144
SLC22A15	1.0545	1.40736	0.000674392	0.0419382
H2AZ1	-1.00294	8.26769	3.73193e-05	0.0101468
PITX2	1.51642	2.50204	0.00081893	0.0465791
IL15	1.28689	1.55176	0.000175436	0.0211052
FAM160A1	1.4105	2.51506	3.47505e-05	0.00970964
GPX8	1.57343	2.9568	0.000479775	0.0359483
BMPER	1.27441	0.381391	0.000439115	0.0340031
TMEM74	2.15962	0.732339	2.30513e-05	0.0078963
CA3	3.22269	2.98049	1.62044e-05	0.00733806
LETM2	1.96778	2.12851	3.08226e-05	0.00889922
RP11-213G2.3	1.21404	1.45727	9.64285e-06	0.00609027
FBP1	1.39658	2.35551	1.28065e-05	0.00675205
RNF183	1.88236	2.16294	0.000156698	0.0199185
PKD1L2	2.30097	1.52236	0.000104293	0.0166609
KIF7	-1.07401	4.45564	0.000934571	0.0497061
RBPMS2	-1.15092	2.34498	9.36482e-05	0.0158226
NAV2	1.02917	6.35914	1.45337e-05	0.00718401
TBC1D16	-1.08076	5.8296	0.000493474	0.0362144
KRT80	2.28054	5.31875	1.81178e-05	0.00733806
PHYHIP	1.43291	0.794032	0.000204304	0.0225635
ATOH8	-1.90796	3.60184	0.000322393	0.0292673
ADRB2	2.47264	0.924651	7.51122e-06	0.00566376
B3GALNT1	1.34173	0.994604	0.000525547	0.0367532
STK32A	1.93073	1.7093	1.76451e-05	0.00733806
COL22A1	2.1729	0.528616	2.31366e-06	0.00348084
FAM153A	1.53461	3.5424	8.01373e-05	0.0146352
RNF150	1.76775	0.869309	0.000878125	0.0482963
FOS	2.00937	4.61553	0.000895863	0.0486761
LRG1	1.2125	3.09302	1.39173e-06	0.00294913
ID4	-1.15606	6.07629	5.15587e-05	0.0117637
MAB21L4	2.40021	2.71748	4.28537e-05	0.0106488
RASGRP1	1.45666	4.51886	0.000166462	0.0204015
ABLIM3	1.50226	3.70163	9.36686e-05	0.0158226
DAB1	1.36105	1.13159	0.000247816	0.0254563
AGR3	2.21684	1.70896	0.000167065	0.0204224
MUC13	1.43063	2.33215	0.000191801	0.0217032
GPR160	1.63581	2.8059	1.64821e-05	0.00733806
CTSF	1.21924	4.77236	6.10068e-05	0.0130434
CNTNAP2	2.54226	1.3818	7.95555e-06	0.00566376
FZD4	-1.18691	6.25901	5.48271e-06	0.00519418
CREG2	1.281	0.410262	0.000256604	0.0259307
HSD11B2	-1.7935	3.63463	8.97908e-05	0.0154497
TCIM	1.63778	6.38433	5.3497e-05	0.0118736
SCN4B	1.47377	0.300561	0.000286	0.0276127
RIMKLA	2.15555	2.81305	1.74504e-05	0.00733806
ERICH5	1.32624	3.08655	0.000368967	0.031028
DPY19L2	2.75081	1.67994	0.000118463	0.0173913
GRAMD1C	1.1996	0.822241	0.000565511	0.0380714
PARP10	1.09279	2.95481	0.000498023	0.0362144
TMEM139	1.97811	0.718297	2.48176e-05	0.0079768
RNF186	1.44757	0.988198	0.000849121	0.0476262
GATA2	-1.92601	4.24934	0.000522403	0.0366981
APOBEC3B	-1.08744	4.41283	0.000355151	0.0306081
B3GNT3	2.47656	2.89579	0.000111276	0.0171241
SSTR2	-1.63327	2.56108	0.000773877	0.0452476
SYNE4	1.20166	2.615	0.000270539	0.0267678
C6orf223	2.81467	2.28596	0.000301274	0.0284658
CLDN7	1.94439	4.86362	9.47063e-07	0.00294913
TMEM30B	1.30174	3.92532	9.49794e-05	0.0158954
CSF1R	1.22018	0.269021	0.000498939	0.0362144
IGIP	1.41934	1.9987	0.000202787	0.0225635
PLCXD3	1.35592	2.94467	0.000204158	0.0225635
EPHA10	2.27601	1.42676	4.19486e-06	0.00438522
ALYREF	-1.23815	6.5424	1.79041e-05	0.00733806
RFLNB	-1.2764	2.76485	0.000824462	0.0467986
ADAP2	2.30322	0.162934	2.49186e-05	0.0079768
GPR173	3.0256	0.214177	6.37339e-05	0.0132339
MAML2	2.75239	0.73271	0.00024775	0.0254563
H2BC21	1.26959	4.56187	1.16192e-05	0.00650005
JAG2	1.42826	2.63361	0.000266169	0.0264998
F8	1.15497	1.55617	0.000738328	0.0439747
TARS3	1.00785	3.38621	0.000183658	0.02137
AHNAK2	2.64504	4.41627	9.64193e-06	0.00609027
NDUFA4L2	2.47879	6.09247	1.07128e-05	0.00643188
MYBL1	1.00319	3.15034	0.000169252	0.0205898
CCDC30	1.05821	1.99037	0.000210948	0.0230039
BTN3A2	1.32472	1.9112	2.38463e-05	0.00795088
SLIT1	-1.59048	0.217	0.000306688	0.028785
CIDEC	2.2383	0.152886	0.00074785	0.0441946
PEAR1	1.19096	1.71849	0.000695309	0.0426269
BTBD8	1.07915	1.6871	7.49777e-06	0.00566376
WDSUB1	1.01511	3.04483	0.000102963	0.0165221
S100A4	1.63551	7.89017	0.000343096	0.0301925
GREB1	-1.10745	2.09339	0.000449175	0.0344303
ATP2A1	-1.3971	1.67143	0.000671197	0.0418398
PPP1R26	2.05478	2.73211	8.85924e-06	0.00590278
ESRRG	-2.17143	1.21069	0.000280156	0.0273317
SPTSSB	2.15523	0.848042	5.36425e-05	0.0118736
HSH2D	2.3486	0.469521	2.0589e-05	0.00770589
CD47	1.64323	3.64858	0.000106412	0.0167793
LAMB3	3.53232	3.96566	2.7974e-06	0.00368721
ANXA6	1.66086	3.15756	3.86694e-05	0.0103744
NPSR1-AS1	1.91512	1.13524	7.72076e-05	0.0144038
MAGEA6	3.00415	1.38718	9.39798e-05	0.0158226
SLC22A4	1.44905	0.481226	0.000443471	0.0342093
SVIL	2.00127	3.81004	1.08264e-06	0.00294913
ADARB1	-1.05432	5.55077	0.000144109	0.0190362
OGDHL	-1.67731	1.12872	0.000739536	0.0440035
SLC2A10	1.71895	2.7301	3.73898e-07	0.00294913
SLC28A3	2.65332	0.0458872	0.000142552	0.0189794
DMBX1	1.52205	1.13137	0.000141446	0.0188902
FAR1	1.04134	1.41387	0.000558251	0.037946
ODAD3	1.82975	0.255069	0.000433609	0.0338796
ATL1	1.84054	1.97401	0.000157715	0.0199185
F5	1.00387	4.89661	0.000509169	0.0363763
PLXNB3	2.84251	0.233805	1.79342e-05	0.00733806
CT83	-1.10219	0.770681	6.26696e-05	0.013148
SAMD9	1.37419	1.3224	0.00010556	0.0167548
HLA-A	1.75812	2.62063	3.62668e-05	0.00999514
LBH	2.27833	2.1985	0.000101766	0.0164981
FNIP1	1.03029	4.77284	0.000669214	0.0418307
LINC02593	-1.44454	3.61481	8.96716e-05	0.0154497
MIR548XHG	-1.57783	0.492229	0.000124211	0.0178343
ST7-AS1	-1.2268	2.15715	0.000429287	0.0336721
TARID	2.90833	0.387228	2.59024e-05	0.00805028
SDAD1P1	1.18425	1.3712	0.000186667	0.0215581
DLX6-AS1	-1.06895	3.33442	6.49354e-05	0.0133917
DARS1-AS1	1.09168	1.00862	5.47834e-05	0.0120578
UBE2E4P	-1.25702	0.00877496	0.000174038	0.0210205
LINC02609	1.25333	0.0963832	0.000617222	0.0400679
SDCBP2-AS1	-1.02275	3.82337	0.000611207	0.0400012
CASP4LP	2.18883	0.364793	0.000889982	0.0485701
AF127936.9	1.20872	1.09107	0.000251138	0.0255238
ARHGEF38	1.97616	0.888873	1.07195e-05	0.00643188
P4HA2-AS1	1.73755	1.29355	0.000388721	0.0317984
OR2I1P	1.75217	0.0525623	0.000447483	0.034344
AGAP13P	-1.1238	0.923321	0.000303234	0.0285332
MRPS31P5	-3.56037	0.662364	5.73436e-05	0.0124973
GATA2-AS1	-1.22707	3.7083	0.000874484	0.0482454
KLRK1-AS1	-1.5417	2.61552	0.000511893	0.0363763
APELA	-1.61427	3.98235	0.000383064	0.0315601
CTD-2353F22.1	1.28302	0.717864	0.000733408	0.0438799
EIF5AL1	-1.10354	2.51223	4.51561e-05	0.010908
LINC02055	1.1634	0.0874811	0.000511909	0.0363763
NAV2-AS1	1.62972	2.44923	0.000536131	0.0370658
LINC02313	-1.30072	2.69789	6.22862e-05	0.013113
RP11-404P21.3	1.17555	1.56655	0.00039548	0.0322295
RNASE4	1.08914	6.24004	0.000249073	0.0254563
RP11-254F7.2	1.14386	1.27214	0.000228141	0.0243105
RP11-650L12.2	-1.24462	0.643812	0.000737896	0.0439747
LOXL1-AS1	2.14474	0.467247	0.000162767	0.0201406
ROCK1P1	1.17159	4.20704	0.000489513	0.0361902
TBX2-AS1	-1.82573	2.06487	0.000190408	0.0217032
RP11-552F3.12	-1.19009	1.90407	0.000626521	0.040455
CTB-176F20.3	-1.90677	0.682185	0.000613556	0.0400012
CYP4F23P	1.67592	0.219615	5.09875e-05	0.0117101
RP11-357H14.17	2.04789	0.205505	6.1916e-05	0.0130804
LHX1	2.33932	0.0984297	0.000177398	0.0211704
NOL12	-1.08242	4.75622	0.000102792	0.0165221
CASTOR2	-1.3154	6.05797	6.92263e-06	0.00566376
LINC01488	-2.16587	1.25831	4.0143e-05	0.0104164
RP11-826N14.7	1.30363	0.320254	0.00010864	0.0170209
CTD-2062A1.3	1.7259	3.6447	3.9187e-05	0.0104083
RP11-102L12.3	1.39637	0.0362372	0.000705662	0.0430007

## Sheet: HLE-LR vs. HLE-WT
Symbol	log2FC	AveExpr	P.Value	adj.P.Val
SLC7A2	2.15438	3.41231	4.57377e-07	0.000498336
THSD7A	-1.28201	3.25388	0.00018015	0.00957928
CX3CL1	-1.58105	4.55664	0.000171092	0.00926192
ST3GAL1	1.30392	4.20982	9.69344e-06	0.00187543
ABHD5	1.01807	5.44025	8.64296e-06	0.00178239
CNTN1	2.89901	2.75304	1.56372e-06	0.000777117
PLEKHO1	1.60451	2.87693	7.08633e-05	0.00541614
RRAGD	1.54765	3.91773	7.22347e-07	0.00065367
ANK1	-1.08329	3.23437	8.92985e-05	0.00619441
RAB27B	1.55435	3.1018	1.22312e-07	0.00033708
HDAC9	1.08345	5.55862	4.92761e-06	0.00145985
CELF2	1.6879	2.85934	3.6122e-06	0.00121671
ADAMTS6	1.471	1.74331	5.04195e-05	0.00438055
LIMA1	1.25543	5.7251	7.73976e-07	0.000669465
TMCC3	1.66442	4.3545	1.60887e-07	0.000350372
ATP2B4	1.50287	8.01864	1.00683e-06	0.000713508
COL11A1	-1.2171	2.87827	1.72685e-05	0.00252287
DGAT2	1.40776	3.61386	2.35189e-06	0.000957012
LIMCH1	-1.12455	2.56777	9.01066e-05	0.00622099
FAR2	1.30446	3.28942	1.36844e-06	0.000755238
COL17A1	1.66534	1.63458	1.38075e-05	0.00221474
PDE4A	-2.02193	3.29325	9.18639e-05	0.00627926
ABCC9	3.05012	1.07037	2.41368e-07	0.000363381
LMCD1	1.50256	5.31265	3.76018e-07	0.000465264
SLC6A15	1.07689	6.02069	3.76541e-06	0.00124752
TRHDE	2.58701	3.80262	3.30283e-06	0.00115256
DHRS9	1.94386	2.71801	4.66108e-06	0.00143271
PPP2R2C	1.89821	1.54287	9.4009e-06	0.00185057
MGLL	1.14938	5.7403	2.37449e-05	0.00297448
SEMA3A	-1.48443	3.75818	7.9259e-05	0.00576196
MOCOS	1.37898	3.69313	7.15653e-06	0.00169231
MCAM	1.67038	4.28858	7.63552e-05	0.00564563
GPC4	1.54897	3.45173	3.6846e-05	0.00371092
AMPH	2.54838	4.74308	2.19328e-07	0.000363381
SP140	2.37387	4.51654	6.68676e-08	0.000253386
MOXD1	1.16973	5.34805	5.76558e-06	0.00152899
TCF7	3.07566	4.2388	1.64468e-06	0.000800834
MECOM	1.98427	1.88756	1.23959e-06	0.000755238
TRIP6	1.5014	3.69242	1.83246e-07	0.000351071
ADAMTS2	2.50783	3.63855	3.61354e-05	0.00368837
TFAP2C	-1.17858	2.27986	0.00016623	0.00909614
SULT2B1	-1.01086	1.21818	3.37712e-05	0.00357454
OAS1	1.107	3.9062	1.74782e-05	0.00253907
CHGB	-1.06837	2.39203	5.56958e-05	0.00460687
PITPNM2	1.03434	3.30919	0.000122794	0.00748995
PITPNM3	1.70539	1.86103	6.40899e-06	0.00164272
CCDC80	1.15495	6.49021	1.07324e-05	0.00197902
DSP	1.48488	4.61896	2.37705e-07	0.000363381
NRP1	1.2171	5.60076	1.00748e-06	0.000713508
TIMP3	2.96934	2.56873	7.90106e-07	0.000669465
HMOX1	1.05215	7.12987	2.14212e-05	0.00281318
TRIM9	-1.46644	3.93395	1.48075e-07	0.000345299
GALNT16	3.20214	3.54833	3.21018e-09	9.56804e-05
EEF1A2	-2.22678	2.4213	7.61208e-05	0.00564563
RASSF2	-1.00099	5.40053	3.99082e-06	0.00129392
CHRDL1	2.61843	3.55487	1.50364e-06	0.000777117
SRPX	2.41344	6.10687	1.10467e-08	9.56804e-05
ABCD1	-1.02693	3.02495	4.6454e-05	0.00421173
FA2H	-1.30745	1.13165	1.97914e-05	0.00272432
EYA1	1.45513	1.36084	4.6788e-06	0.00143271
NDRG1	1.11686	4.62187	4.3096e-06	0.00136671
NCALD	1.75967	2.02688	5.14369e-05	0.00443616
APLP1	-1.33854	4.67302	3.33813e-06	0.00115256
ATP1A3	-2.04723	2.0945	1.38703e-06	0.000755238
ITGB8	-2.62547	1.8483	3.01689e-06	0.00110189
GSDME	1.29831	5.88029	2.25598e-07	0.000363381
CPVL	2.59719	4.6281	2.15659e-07	0.000363381
GRB10	-2.38653	1.23258	1.07025e-06	0.000729094
COBL	1.30703	1.55535	0.000140352	0.00814247
IMPDH1	-1.08958	3.0747	0.000116129	0.00722885
SLC1A1	1.8329	1.08197	3.01794e-05	0.00338221
PRUNE2	1.02408	2.95148	4.1962e-05	0.00398771
RGS9	1.08469	3.48835	3.11284e-05	0.0034503
ASIC1	-1.24888	2.47015	9.83651e-06	0.00187543
ALDH2	1.62042	2.6422	2.06931e-05	0.00278084
OAS2	1.47964	2.07489	4.64238e-06	0.00143271
SLCO1B3	2.05735	1.07308	3.81715e-05	0.00377543
MDGA1	-3.26941	2.23165	6.03031e-05	0.00484551
BMP5	-1.29989	4.33221	5.04371e-06	0.00145985
PERP	1.26139	5.72286	3.41116e-05	0.00357454
ARFGEF3	1.37068	4.24524	1.06364e-05	0.00197782
LAMA4	1.20479	3.00135	7.41807e-05	0.00557321
SEMA5A	2.3985	1.45483	1.2617e-06	0.000755238
LOX	1.43479	5.06196	2.9639e-07	0.000399336
SLC12A7	-1.136	2.29227	6.79211e-05	0.00530609
FGF1	1.53388	5.66791	1.22691e-06	0.000755238
STC2	1.03359	5.41954	5.33216e-06	0.00148328
HES1	-1.35672	3.13741	5.9304e-05	0.00479413
FOXP1	1.4439	4.18885	1.47181e-07	0.000345299
FN1	1.08157	6.39674	8.40848e-05	0.00597662
ST3GAL5	-2.12133	4.38932	8.06053e-07	0.000669465
ID2	-1.27189	4.41351	4.26424e-06	0.00136074
QPCT	1.28979	4.62089	1.68785e-05	0.00249595
RND3	1.17683	4.09241	2.75885e-05	0.00324165
MARK1	1.03001	3.04636	1.25686e-05	0.00212599
GBP1	1.27986	3.52614	1.11052e-05	0.00200482
NRP2	1.26384	3.73931	2.847e-05	0.00327701
SGK1	-1.17904	7.74224	3.90003e-08	0.000185288
TCF21	-1.15107	3.70839	3.42966e-05	0.00357454
VAMP8	-1.71897	2.28347	9.43849e-05	0.00639392
OLFM3	1.43026	2.4346	4.03273e-05	0.00389338
KLF12	2.64009	2.175	1.98715e-06	0.000879424
LTBP2	1.71656	3.64814	3.80582e-05	0.00377543
FKBP1B	-1.15846	1.72067	1.59449e-05	0.00242291
PPP1R3C	-1.38686	5.1752	8.39209e-06	0.00176174
TGFBI	1.04694	9.7528	8.18137e-06	0.00174504
SOCS2	-1.074	2.62372	6.22691e-05	0.00498729
KCNJ8	1.82883	1.12252	1.67988e-05	0.00249595
INHBA	1.02897	5.40877	0.000145785	0.0083702
MMP19	1.17571	1.69865	0.000106362	0.00688968
DAW1	1.2773	2.24541	3.44306e-05	0.00357454
COL21A1	-1.65988	3.14777	1.4332e-06	0.000762234
NRN1	2.46557	1.40655	4.8586e-05	0.00432543
ATXN1	1.20942	4.81877	1.29381e-06	0.000755238
RUNX2	1.04834	3.0086	7.22285e-06	0.00169231
EREG	-1.54952	2.54493	0.000168288	0.00919216
IRF1	1.0278	5.66598	0.000101914	0.00673099
FOSB	-1.82867	5.07485	9.10164e-07	0.000702951
ID1	-1.25121	5.78309	6.13056e-06	0.00159526
ZFP36	-1.01176	4.94885	8.48549e-05	0.00601022
KDR	2.22444	1.1134	6.62903e-06	0.00166549
GAL3ST1	-2.07654	1.95565	8.84568e-05	0.00617873
PODXL	1.53304	6.99523	8.11991e-06	0.00174504
ARHGAP22	1.70741	2.99645	3.72564e-05	0.00372459
MTUS1	1.38142	2.71938	5.30777e-05	0.0045198
FGF13	2.16431	2.23775	1.43125e-05	0.00227756
ZSWIM6	1.16564	5.47537	1.68324e-05	0.00249595
COL5A1	-2.18106	3.53405	0.000103896	0.00680834
LRP3	-2.55626	1.65974	1.99859e-05	0.00272432
KREMEN2	-1.26599	2.13103	0.000187043	0.0098362
PPARG	1.10542	7.66677	4.20105e-07	0.000486711
PTPRE	1.14568	2.52294	1.99954e-05	0.00272432
MATN2	-1.00766	3.67461	6.67578e-05	0.00523612
VSTM2L	-2.08246	3.22482	2.28247e-05	0.00289511
EPSTI1	2.15676	1.08819	1.50297e-05	0.00234858
EPHB2	1.1897	7.83176	1.07389e-05	0.00197902
TMTC1	2.30143	4.50437	4.72468e-08	0.000196656
AMPD3	1.10614	4.34665	0.000143708	0.00827448
RRAS2	1.19496	6.97621	9.02355e-06	0.0018175
IRAK2	1.01267	6.28675	7.6383e-06	0.00171522
VAV3	-1.27088	5.51875	2.78098e-06	0.00104727
EMP1	1.76299	4.84715	6.40423e-09	9.56804e-05
SPOCD1	1.39478	4.55245	3.92522e-07	0.000475972
DTNA	1.70942	4.66242	1.87971e-08	0.00012663
FHOD3	1.71915	6.43392	6.77911e-06	0.0016735
TBX3	-1.58582	2.51878	3.16393e-05	0.0034878
EPHA7	-2.05497	1.96425	6.87321e-05	0.00531534
PKIB	2.51465	2.69161	5.1406e-06	0.00145985
DYSF	1.92376	4.09708	9.08392e-06	0.00181768
BCO1	-1.71228	1.56935	2.91073e-06	0.00107608
NIBAN1	1.04595	7.25816	5.33325e-06	0.00148328
CYP27A1	1.25986	2.5879	2.82445e-07	0.000389196
GATA4	-1.87686	2.24281	1.11689e-05	0.00200482
TLR4	1.47077	3.20737	7.50837e-06	0.00169231
CASP1	2.96397	1.34271	1.25907e-05	0.00212599
SMAD6	-1.78347	1.64689	2.06333e-05	0.00278
CYP1B1	-1.57453	4.86456	7.59243e-08	0.00026223
MYPN	1.32752	4.02508	3.42421e-05	0.00357454
AOX1	1.11171	4.92093	9.50193e-07	0.000711237
SEMA7A	1.24961	5.47798	6.44841e-06	0.00164272
FBN2	1.54119	6.34294	1.25018e-06	0.000755238
GLIPR1	1.26573	8.0891	1.08079e-08	9.56804e-05
CYP1A1	1.36344	3.29999	1.03219e-06	0.000713508
CELSR2	-1.93878	1.61718	2.77402e-05	0.00324794
DUSP10	1.34497	1.53033	5.22818e-05	0.0044747
CNIH3	3.38675	1.14382	1.70617e-08	0.00012663
EML4	-1.22874	8.06978	1.54892e-06	0.000777117
TM4SF19	1.34473	6.66544	2.40924e-07	0.000363381
ANK2	1.05418	5.15301	1.06671e-05	0.00197782
PCYOX1L	-1.13318	3.07934	7.80536e-05	0.00572002
IGFBP3	1.90855	7.07967	1.30962e-06	0.000755238
FRMPD3	1.82602	2.07601	0.000105994	0.00688051
DOCK11	1.28057	3.44624	2.19078e-05	0.00283819
PTGES	2.13359	4.69542	2.61322e-06	0.000996474
PROSER2	1.58225	2.68546	8.03314e-05	0.00580634
FAM171A1	1.06992	3.90797	5.60037e-05	0.0046141
ANKRD1	2.19661	2.30326	1.24772e-05	0.00212599
P4HA3	1.25122	2.43418	2.60513e-06	0.000996474
MMP3	2.51817	1.59098	2.9945e-05	0.00337466
PCDH15	-2.67338	2.43631	1.29947e-05	0.00215854
LYPD1	-1.03274	3.6872	0.000182008	0.00965608
THRB	1.37704	2.79396	4.94323e-06	0.00145985
NR3C2	2.19103	2.04839	1.38481e-06	0.000755238
KCNE4	2.46449	2.63115	1.12541e-06	0.000742553
HSPB8	1.67929	5.1277	3.28843e-07	0.00041537
PDK1	1.09419	3.91794	9.93073e-07	0.000713508
SPOCK1	2.38349	3.97272	1.32731e-06	0.000755238
PTPRD	1.98344	1.73768	1.70871e-07	0.000350372
RETREG1	1.10922	1.70824	2.29345e-05	0.00290296
C4orf19	1.66637	1.13819	4.52495e-05	0.00417576
JAM2	1.11784	3.32083	4.38305e-05	0.00409272
PLCL2	1.56487	3.41177	1.03188e-05	0.00193914
ADCY8	1.73407	3.27234	6.90464e-07	0.000639926
GRIP1	1.36822	2.77638	0.000104945	0.00683441
FBXO32	3.61994	1.23115	9.15934e-07	0.000702951
CREB3L1	1.49281	1.68914	0.000147917	0.00842165
CFAP251	2.59018	1.43699	1.3104e-05	0.00216484
STC1	1.31008	8.27382	1.73366e-07	0.000350372
FGFR4	-1.56217	3.00807	1.52727e-05	0.00236825
AK4	1.61884	5.14422	1.1325e-06	0.000742553
MEGF6	-1.50844	3.875	8.5115e-07	0.000690091
GBP2	1.87725	3.08399	1.67128e-05	0.00249581
GBP4	1.25689	1.98998	8.11799e-05	0.00583907
VCAM1	-1.84275	3.64411	6.43669e-06	0.00164272
NLRP3	1.16195	1.70754	9.30467e-05	0.00633156
IER5	1.04875	5.223	1.04583e-07	0.000311288
FSTL1	1.04692	6.19147	1.0356e-06	0.000713508
IGFBP7	-1.18494	6.00742	5.06658e-05	0.00439466
IFI16	1.21967	5.45923	2.06953e-06	0.000902703
EFHB	-1.39289	2.53451	7.38334e-06	0.00169231
PTPN13	-1.11243	6.12958	1.78121e-05	0.00255912
ADAMTS9	-1.8114	3.56215	8.09783e-06	0.00174504
PRKCD	1.14821	3.38225	1.05775e-05	0.00197328
PLXNB1	-1.19166	1.95087	4.04201e-05	0.00389379
F2RL1	-1.21165	6.36999	1.96523e-06	0.000876117
EBF1	2.40889	1.81784	2.6878e-05	0.00318221
STEAP1	1.04724	4.40922	0.000164036	0.0090168
SUN3	1.17655	6.28114	1.86662e-06	0.000855522
RASEF	2.17058	3.23209	3.14251e-06	0.0011274
SALL2	-1.51052	1.97904	0.000100333	0.00667017
ARHGAP42	1.42733	2.86854	4.33803e-05	0.00406515
CLMN	1.1845	4.44795	9.54229e-05	0.00644264
HTRA1	3.22596	2.85299	1.91082e-07	0.000351071
FBN1	-1.18324	1.85178	9.35035e-05	0.00635551
CLMP	1.85304	2.96602	1.08661e-06	0.000732015
CYB5R2	1.52098	2.5283	5.09432e-06	0.00145985
SERPINB7	1.39997	6.9152	8.99805e-09	9.56804e-05
PLEKHA7	2.32844	4.26007	2.5482e-05	0.00305935
GPRC5B	-1.95038	2.81037	2.43089e-05	0.00299408
KRT80	1.1809	6.79413	3.2779e-05	0.00354726
CAVIN2	-1.33185	4.14743	6.70861e-05	0.00525508
SERINC2	2.51372	3.99431	3.2859e-07	0.00041537
COL3A1	-2.43613	1.06858	2.31497e-06	0.000948354
ENHO	-1.68575	1.64631	0.000187732	0.00986326
SLC35G2	1.25396	3.22258	7.61391e-05	0.00564563
PARM1	-2.27476	1.42729	5.40482e-05	0.00455764
SH3TC2	1.43455	2.42169	5.61637e-05	0.0046141
ADRB2	1.0418	3.99828	5.92338e-05	0.00479413
PCDH7	-1.65024	2.36884	2.25759e-06	0.000931142
LONRF2	-1.60913	2.52271	5.23266e-05	0.0044747
CDH2	1.75128	6.75951	2.09825e-08	0.000127217
SYT9	2.78261	3.50581	1.34875e-07	0.000340727
MTSS1	1.99505	2.30027	1.139e-06	0.000742553
CHST11	2.66177	3.65	1.09191e-08	9.56804e-05
MCC	2.41048	2.4533	7.4771e-06	0.00169231
LPAR3	1.70941	2.08125	7.50325e-06	0.00169231
BCL2	1.27008	2.82241	4.60281e-07	0.000498336
SNTB1	3.43071	3.96057	1.07819e-07	0.000311288
ARNT2	-1.81166	3.43977	1.78065e-06	0.000830466
JUP	-1.72414	4.37288	5.33153e-05	0.00452605
SLCO4C1	-1.28698	4.5363	0.000148251	0.00843194
TP53I11	-1.74872	2.03816	0.000136199	0.00804067
NRIP3	1.28761	4.97777	1.34327e-06	0.000755238
RIMS2	1.91024	1.60011	6.95207e-05	0.00536948
CTD-2368P22.1	-1.09821	2.28646	4.96076e-05	0.00434912
BDNF	-1.20289	4.47822	2.48303e-06	0.000977571
SAMD9L	1.25142	2.28046	4.96595e-05	0.00434912
CD163L1	2.13367	1.74505	0.000140269	0.00814247
CCDC184	-1.33461	1.93703	6.31431e-06	0.00162909
ADAMTSL1	1.95706	5.23561	5.95574e-06	0.00155645
CA8	-1.12676	3.43895	0.000110134	0.00705209
KCTD12	1.69226	1.39281	1.14527e-05	0.00202722
ZHX2	2.16301	1.56019	1.45383e-05	0.00229634
TRIML2	1.59265	2.54043	3.00196e-05	0.00337678
MTURN	1.29914	3.36269	1.94495e-06	0.000873499
SHISA2	-1.48996	5.62079	8.24334e-08	0.000263049
MAB21L2	-1.39818	1.88302	0.000103521	0.00679287
UBA7	1.61969	1.2888	4.78568e-05	0.00428337
PLCXD1	-1.00712	4.99045	2.38394e-05	0.00241051
NDN	-2.28992	3.12188	1.65447e-05	0.00248547
PLCXD3	2.28243	1.63548	7.78516e-08	0.00026223
CADM1	-1.02461	6.78214	4.9381e-06	0.00145985
GAS6	1.80555	5.89042	2.39449e-06	0.000962089
GPC6	1.43078	3.74978	2.46192e-07	0.000363381
TNFAIP8L3	1.83	2.44169	2.09975e-05	0.00279798
SLC35F3	2.64717	2.41065	2.51723e-07	0.000363381
OLFML1	2.03189	3.68453	4.0397e-06	0.00129591
ST6GALNAC3	1.80419	2.2539	1.16196e-06	0.000749463
KCNQ3	2.35856	2.00787	1.72685e-07	0.000350372
FOXO4	1.05177	2.29684	0.000112569	0.00706711
POU3F2	1.93545	1.31184	2.24076e-05	0.00286016
TMEM255B	2.3059	2.38917	4.13452e-05	0.00395388
NELL2	1.95235	1.35364	8.86608e-05	0.00618585
FLRT2	2.53416	2.75991	4.04776e-05	0.00389379
PRKG1	2.85793	1.33901	0.000159363	0.00884444
MTARC1	1.81365	3.1118	3.27654e-05	0.00354726
THBS2	-1.30518	5.02359	3.07128e-05	0.00341047
PRR5	-1.51858	1.51036	8.82051e-06	0.00179265
AKR1C1	2.27908	1.37612	5.6718e-06	0.0015216
PLEKHG7	1.09017	2.33729	0.000184739	0.00976523
PEAR1	1.216	4.60697	4.78891e-06	0.00145176
S100A3	1.04932	1.96129	8.60533e-05	0.00606676
IER5L	-1.29487	3.47298	8.37884e-05	0.00596255
SBSN	3.43579	1.32409	8.84055e-06	0.00179265
MAOA	-1.85745	2.7606	1.88118e-05	0.00265247
AKR1C3	2.65757	3.23487	9.32672e-07	0.000706849
LAMB3	2.17637	2.28524	3.46449e-06	0.00118673
HCAR1	1.52025	4.4044	1.30977e-05	0.00216484
SULT1C4	-1.38968	2.41172	9.49349e-05	0.006424
CHSY3	2.00004	2.03256	3.23355e-07	0.00041537
GLMP	1.1169	5.22498	9.72937e-06	0.00187543
L1CAM	-3.42622	2.68898	2.42812e-06	0.000968531
POU3F3	-1.71101	3.10659	7.18911e-06	0.00169231
TGM2	1.07013	7.24982	5.02559e-05	0.0043779
LINC00862	1.78649	2.1385	7.31067e-06	0.00169231
PLPP4	2.58742	2.55806	1.02343e-05	0.00193304
RP11-497E19.1	2.39414	2.00048	5.19148e-05	0.00446467
CRLF2	1.6856	1.4174	7.08555e-05	0.00509881
VGLL3	1.64463	4.3392	9.32082e-06	0.0018468
CGB8	2.45226	1.97973	1.26408e-05	0.00212599
NPEPL1	-1.27897	2.66882	5.09879e-06	0.00145985
NPTXR	1.19853	6.01185	3.31552e-05	0.00357052
LINC02577	1.40157	2.37135	4.25258e-05	0.00402237
LINC00702	1.28768	1.92898	4.97103e-05	0.00434912
LINC02154	2.23754	4.64119	5.31512e-06	0.00148328
TRHDE-AS1	2.89066	2.40625	1.32086e-06	0.000755238
RP11-320G24.1	1.17698	2.64939	1.18458e-05	0.00206316
AC003092.1	2.89455	1.8119	4.8584e-09	9.56804e-05
RP13-143G15.4	1.89917	1.3186	0.000130747	0.00780346
AC073130.1	1.23118	2.2643	3.26616e-06	0.00115132
ARHGEF25	-1.46011	1.96846	1.26585e-05	0.00212599
HOGA1	-1.04941	3.39492	0.000165569	0.00907932
RTL5	-2.64306	1.61375	1.72454e-06	0.000820692
MIR4300HG	1.9953	1.24626	3.54491e-06	0.00120746
LINC02057	1.5428	1.46534	9.12541e-05	0.00625168
SELENOP	1.09899	5.93709	4.57965e-05	0.0041958
HOXA-AS2	-1.41839	3.46702	2.53298e-06	0.000984454
MIR100HG	1.85171	4.71266	8.63002e-06	0.00178239
ODC1-DT	-1.10854	1.21408	4.58266e-05	0.0041958
ITGB3	1.76326	6.06994	2.13824e-07	0.000363381
RP11-114G11.5	-1.40261	1.08091	0.000136621	0.0080499
RP4-555D20.2	1.94857	1.71053	8.15308e-05	0.00584995
LOXL1-AS1	1.64865	2.74633	1.1155e-05	0.00200482
LINC01029	-1.18138	3.43541	4.27483e-05	0.00403084
AFAP1-AS1	-1.13181	7.13609	8.6342e-07	0.000690091
GAS6-DT	1.97299	1.53396	2.69252e-05	0.00318221
RP11-54H7.4	2.01635	2.16703	3.97285e-08	0.000185288
HNF1B	-1.44713	3.68686	9.15729e-05	0.00626644
PCDHGB5	-1.21979	4.80639	0.000114171	0.00715099
RP4-681L3.3	1.03223	1.42771	8.65129e-05	0.00608501

## Sheet: HLE-RR vs. HLE-WT
Symbol	log2FC	AveExpr	P.Value	adj.P.Val
THSD7A	-1.63212	3.05529	3.99462e-06	0.000314161
TMEM132A	-1.15023	5.31764	1.17689e-06	0.000155119
ALDH3B1	1.36154	4.24741	2.17477e-07	6.64763e-05
AASS	1.11926	3.08137	1.29132e-05	0.000624344
MAMLD1	2.0663	5.3548	1.8205e-07	6.20094e-05
SAMD4A	1.07952	5.34827	3.24655e-07	8.13382e-05
BIRC3	-3.06104	3.1427	5.37176e-07	0.000104054
EHD2	1.42519	8.27219	9.94219e-07	0.000146309
RRAGD	1.61153	3.94037	7.04549e-08	4.14727e-05
RAB27B	1.37831	3.00319	1.18375e-07	4.84418e-05
DSG2	1.06348	7.71181	5.28495e-07	0.000102996
WWC3	2.70033	3.35612	4.19895e-08	3.56565e-05
KITLG	-1.4536	4.14329	2.70826e-07	7.38125e-05
SYNE2	1.03653	7.05102	4.12476e-06	0.000319297
CYFIP2	1.03082	5.85654	3.14966e-06	0.000275151
ATP2B4	1.39291	7.9479	3.83407e-09	1.25265e-05
GPC1	1.34292	5.2698	2.81594e-06	0.00026511
MYLK	1.79961	7.36542	2.31867e-08	2.60335e-05
FAM107B	1.37819	3.32963	2.07233e-05	0.000843256
LMCD1	1.35036	5.22119	4.80004e-08	3.69781e-05
SPEG	2.0055	3.46634	2.89945e-06	0.000267985
MGLL	1.39483	5.84882	2.56901e-07	7.1839e-05
NUAK1	1.21589	4.62578	1.52483e-06	0.000178476
ARHGEF10L	1.1351	3.91991	2.02476e-05	0.000834543
RASAL2	1.02419	6.48236	9.19881e-08	4.5674e-05
PAG1	1.09691	4.42614	7.52073e-07	0.000125962
MCAM	1.54298	4.20778	7.97412e-06	0.000465163
GPC4	2.13817	3.73136	4.16343e-07	9.12652e-05
MAP2	1.5304	4.03632	1.50864e-07	5.71679e-05
AMPH	2.1845	4.54678	6.14923e-08	4.04895e-05
OSTM1	-1.04294	6.48101	0.000139034	0.00294434
DOCK9	1.01167	5.25257	1.51538e-06	0.000178476
ZFHX4	-2.03021	3.70814	5.4072e-08	3.86946e-05
TGFB2	1.00219	5.22508	2.76898e-05	0.00100529
TBC1D2	1.22668	3.74419	2.94325e-06	0.000268749
ITPR3	1.37501	7.89202	1.15321e-06	0.000154006
DSP	2.39921	5.06313	5.30994e-10	5.36569e-06
ABLIM1	1.39096	7.83829	1.70108e-09	1.03136e-05
NRP1	1.50582	5.72905	5.81629e-08	4.00729e-05
ARVCF	1.61361	3.13785	8.65282e-06	0.000488474
PDGFB	1.63161	4.57158	1.81796e-06	0.000199318
PLEK2	1.23465	4.0588	1.03476e-06	0.000148924
NFATC2	1.34784	3.69867	1.9658e-06	0.00021095
RASSF2	1.30269	6.53864	5.43285e-08	3.86946e-05
PLCB4	1.62509	7.05104	3.85094e-09	1.25265e-05
JAG1	1.38225	4.0834	7.88847e-07	0.000130372
SMAD7	1.07354	5.45585	2.48152e-07	7.1645e-05
SRPX	1.55181	5.66646	6.3074e-08	4.0518e-05
KLHL4	-1.17751	6.26415	7.60754e-08	4.27079e-05
GABRE	1.02799	3.02232	6.57216e-06	0.000413351
CCDC113	-1.055	3.88391	3.79745e-07	8.71404e-05
SLC7A5	1.20798	8.08208	5.59098e-06	0.000380133
CPPED1	1.08275	3.87307	2.15106e-07	6.64763e-05
BMF	1.67538	4.27953	1.10713e-07	4.81111e-05
NDRG1	1.76735	4.93287	5.09447e-08	3.72142e-05
PPP1R13L	1.27815	4.79391	1.99498e-06	0.000212006
APLP1	-1.05276	4.79541	2.21757e-05	0.000879245
TFPI2	-2.92493	4.69257	4.88491e-07	9.89146e-05
LFNG	1.27227	5.13033	6.39036e-07	0.000116701
CPED1	-1.74531	5.35397	2.21818e-08	2.58611e-05
GRB10	3.54943	4.18783	7.07699e-10	6.12969e-06
AHR	1.00401	5.46139	1.80102e-05	0.000772968
CLIP2	1.15555	5.06426	1.08057e-05	0.000560918
PRUNE2	1.14292	3.00015	5.98196e-06	0.000394653
DNM1	1.85364	3.86225	6.33041e-07	0.000115956
GLIS3	1.09671	5.76366	3.94492e-06	0.000312331
VSIR	-1.47578	4.10101	1.50565e-05	0.00068534
ZMIZ1	1.50084	6.68476	3.32512e-07	8.24661e-05
TBC1D12	1.12039	4.66464	8.9925e-07	0.000140578
CCL2	-2.61697	6.18304	5.4886e-08	3.86946e-05
NDUFC1	-1.08018	5.42602	9.64072e-06	0.00052423
CPE	1.11908	4.3737	3.70836e-05	0.00122461
NECTIN1	-1.21051	3.33172	7.8469e-05	0.0020015
ELMOD1	-1.3532	3.01803	9.38575e-07	0.00014334
SH2B3	-1.24911	7.2497	1.04768e-07	4.70527e-05
LTBR	-2.97867	5.47885	1.94103e-07	6.35643e-05
ARHGDIB	-1.82914	3.73865	6.59479e-07	0.000119356
CILK1	1.04207	4.40492	2.83597e-06	0.000265612
CRYBG1	-1.08684	5.23843	3.5904e-08	3.2996e-05
PERP	1.63722	5.89399	1.16552e-06	0.000154881
ARFGEF3	1.59086	4.33911	1.646e-07	5.93642e-05
DNPH1	-1.04375	4.02291	0.00032458	0.00534473
COX7A2	-1.26536	6.1617	8.88194e-05	0.00217268
VEGFA	1.39285	6.53298	9.00591e-09	1.9501e-05
PCDHB3	-1.03006	4.88395	1.48975e-06	0.000176758
STC2	1.68983	5.73061	9.66082e-08	4.60988e-05
SMC4	1.00779	7.39701	1.90279e-05	0.000797277
BCHE	-1.56759	3.47084	1.95002e-07	6.35643e-05
WNT5A	1.48119	4.85924	4.23432e-08	3.56565e-05
FOXP1	1.05109	3.97922	1.14978e-07	4.84418e-05
SLC4A3	1.12971	3.10437	2.84668e-05	0.00102551
APC2	1.11661	3.96696	9.09276e-05	0.00220166
RND3	1.5821	4.28096	5.00133e-07	0.000100741
MARK1	1.08729	3.06061	3.94009e-06	0.000312331
MFAP2	-2.01486	3.34603	3.37463e-07	8.31722e-05
FILIP1	-1.39331	6.8056	2.06621e-05	0.000842464
PLAGL1	1.57988	3.18068	1.52241e-06	0.000178476
CCN2	1.0461	8.3513	5.47544e-07	0.000105389
SATB2	1.95859	3.74056	1.21764e-08	2.27865e-05
C1orf198	1.16968	6.04351	3.68615e-07	8.59582e-05
DCAF4	1.094	4.27665	3.80084e-08	3.33978e-05
FLVCR2	1.12962	3.31198	4.60178e-07	9.6877e-05
EGR1	1.73362	8.44971	1.30187e-08	2.29678e-05
TMEM156	-2.09932	3.89816	2.39523e-09	1.16975e-05
BHLHE41	1.3145	6.55469	4.64966e-07	9.721e-05
ITPR2	-1.06391	4.30701	3.95408e-06	0.000312331
ATP7B	-1.00814	3.69963	3.45205e-07	8.37191e-05
IL13RA2	-1.81446	5.44095	2.22214e-08	2.58611e-05
CDKN1A	-1.26608	5.03006	4.44327e-06	0.000333824
RUNX2	1.66929	3.30418	1.44567e-07	5.51265e-05
IRF1	1.33245	5.80342	3.62813e-06	0.0003001
FOSB	1.06498	6.50613	2.00768e-06	0.000212436
RBCK1	1.07525	7.22327	2.40054e-07	7.01796e-05
MMP24	1.29664	4.54813	1.24023e-08	2.27865e-05
EMC1	-1.00038	7.13538	3.08631e-08	3.05547e-05
FBXL16	1.58682	3.52955	6.25846e-06	0.000405843
PNKD	-1.13731	4.33378	3.05567e-06	0.00027165
HIP1	-1.11319	6.08135	5.61055e-06	0.000380314
CGNL1	1.67387	4.45364	2.0604e-08	2.58611e-05
LOXL1	1.37132	4.95361	1.89252e-05	0.000795804
SPCS3	-1.19292	7.73016	1.2517e-05	0.000613866
MTUS1	2.69876	3.36296	6.70684e-09	1.69432e-05
EPB41L4A	1.01691	3.57471	0.000310407	0.00518146
SAT1	1.03833	6.63257	4.90994e-06	0.000351207
SH3BP4	2.07787	6.62913	2.50813e-09	1.16975e-05
GDF15	-1.45073	3.61751	1.3749e-05	0.000649223
COL5A1	1.24372	5.22524	1.19407e-06	0.000156642
GFPT2	-2.00826	4.00156	9.53514e-07	0.000144512
ITGB4	2.15796	3.83409	1.10084e-06	0.000150995
MATN2	1.07366	4.6959	3.19414e-06	0.000277451
MTSS2	1.38727	5.39585	0.000120914	0.00267653
FBXO44	-1.13595	4.83608	2.5211e-07	7.1839e-05
WASF3	-1.32196	5.13774	4.88659e-08	3.69781e-05
BEX2	-1.01733	3.22012	0.000277912	0.0047828
RNF128	-1.52194	3.38425	7.40584e-07	0.000125962
GSTM3	-1.04482	5.57577	8.19472e-07	0.000132847
WNT2B	1.03197	5.22118	3.12452e-08	3.05547e-05
PTGFRN	1.88496	4.62765	9.91204e-09	2.00322e-05
DOCK2	1.29209	4.56629	3.61594e-07	8.53482e-05
LRP4	-1.02642	3.77765	7.53214e-06	0.000450094
ADAM19	-1.32779	5.94904	7.86461e-08	4.30587e-05
TES	1.08342	4.40479	4.70303e-07	9.73672e-05
DYSF	4.30045	5.26871	2.78133e-09	1.20451e-05
GLUL	1.08788	8.82919	2.24711e-07	6.74702e-05
ANKRD36	1.02489	3.14039	4.09922e-05	0.00130518
CCN3	1.20963	3.90082	2.91488e-06	0.000268181
SYTL2	1.3248	3.06451	1.78056e-07	6.20094e-05
THBS1	2.23714	8.7385	5.70267e-09	1.64644e-05
PAQR5	-1.00774	6.23077	2.16931e-07	6.64763e-05
UACA	1.03985	5.69863	6.82581e-08	4.09751e-05
ARHGAP29	1.03164	9.05411	1.81204e-07	6.20094e-05
IFI44	-1.69754	3.94395	4.88689e-07	9.89146e-05
SEMA7A	1.34489	5.51081	2.20351e-08	2.58611e-05
PRICKLE1	4.56164	3.03618	3.71903e-07	8.63927e-05
SLAIN1	1.0342	3.26666	3.99853e-06	0.000314161
SYT16	1.55063	3.98188	8.33238e-05	0.00208241
RNF157	1.69315	4.81114	2.74157e-08	2.82842e-05
COL6A1	-1.99603	7.1727	3.55462e-06	0.000297075
COL6A2	-1.2473	6.6235	9.56293e-05	0.00227909
SIK1	1.16513	3.22948	2.07209e-05	0.000843256
DOP1B	1.13355	4.34151	2.14763e-05	0.000861496
RNPEPL1	1.02301	5.3745	0.000566014	0.0079571
ADAMTSL4	1.21074	4.61702	2.96566e-06	0.000269505
MAP3K21	1.0298	3.69813	3.33387e-06	0.000285095
STAC	1.79904	5.02252	7.01829e-08	4.14727e-05
IQSEC1	1.49645	5.53312	2.06854e-05	0.000842846
PTPRG	2.5129	6.56203	9.26859e-10	6.24394e-06
IL17RD	1.15594	3.76801	9.96928e-06	0.000534773
LRIG1	1.46879	3.11397	1.24135e-07	4.95152e-05
TM4SF19	-1.06507	5.44932	2.29241e-07	6.74702e-05
FAM50B	-2.09225	3.18426	2.59558e-08	2.81018e-05
CREB5	1.16571	3.90786	1.08843e-07	4.78198e-05
EGFR	1.21181	8.41412	1.56326e-08	2.49422e-05
TMEM47	-1.05808	3.95178	0.00016683	0.00332836
SLC16A2	1.24795	7.57058	1.40122e-07	5.37698e-05
DOCK11	1.58533	3.57952	1.51949e-06	0.000178476
MAL2	1.81074	4.37865	9.70088e-07	0.000144512
GSN	1.4317	6.2552	1.06981e-06	0.000150145
TUT1	-1.36893	3.66466	5.13815e-05	0.00150569
SERPINH1	-1.11484	6.17219	4.42249e-08	3.57514e-05
B3GAT3	-1.18528	4.28764	1.20739e-06	0.00015709
FAU	-1.1914	7.1583	2.34848e-05	0.000910352
CNKSR2	1.21339	4.25083	2.06538e-06	0.000217402
LYPD1	-1.075	3.65281	3.02485e-05	0.00106564
VEGFC	-1.40855	4.74448	4.80204e-07	9.84789e-05
MFSD6	1.42774	3.99557	1.96075e-07	6.35724e-05
ASAP2	1.27594	5.8247	3.78557e-07	8.71404e-05
SETBP1	1.69467	3.58049	3.64032e-07	8.55476e-05
PDE3B	1.11962	4.57512	3.01257e-06	0.00027165
SPOCK1	1.90047	3.71933	2.83387e-08	2.86363e-05
PLOD2	-1.43046	6.52924	7.48236e-07	0.000125962
DAB2	1.0215	5.91224	1.85523e-08	2.58611e-05
LURAP1L	-1.16907	4.47417	1.26246e-06	0.000161825
HS3ST3A1	1.09859	3.67802	2.95445e-05	0.00105059
THY1	-2.11946	5.9517	7.69628e-09	1.80937e-05
JPH3	1.26384	3.57924	6.56382e-06	0.000413255
PRKCA	1.17899	7.27181	2.26066e-08	2.58611e-05
TNIK	1.42527	5.07224	3.2627e-08	3.13996e-05
RAB11FIP1	1.67775	5.0799	9.18678e-10	6.24394e-06
ETS2	1.79853	5.53953	7.85736e-08	4.30587e-05
DPYSL5	3.39737	3.92215	8.39842e-09	1.88591e-05
H2BC5	1.01216	3.091	2.75127e-07	7.42133e-05
F11R	-1.04996	5.26119	5.03506e-08	3.72142e-05
RUNX1	1.04008	5.12916	2.65953e-07	7.29626e-05
PKN3	1.0991	3.19416	2.91046e-07	7.57344e-05
IL6R	1.62562	4.7066	2.81674e-07	7.42518e-05
FGFR4	1.02597	4.28131	3.49157e-05	0.00117783
LY6E	-1.19227	4.70425	0.000136529	0.00290932
ITGA5	-1.80569	7.61748	2.57797e-07	7.1839e-05
SHANK2	1.18591	4.80217	1.27063e-06	0.000162194
AK4	1.85153	5.24848	2.18414e-08	2.58611e-05
DHRS3	-1.8515	4.74927	4.54631e-08	3.57978e-05
KIAA1522	1.43982	7.14212	1.41156e-06	0.000172819
ATF3	1.8971	5.50589	8.31335e-08	4.38294e-05
MAPKAPK2	1.36366	6.7829	6.16607e-08	4.04895e-05
CLDN1	-1.56237	6.02047	4.48767e-08	3.57978e-05
EIF4E3	1.47779	3.39664	1.13226e-05	0.000579309
FSTL1	1.72119	6.51384	6.32847e-09	1.66824e-05
ADORA1	1.08491	5.0221	2.45627e-07	7.12553e-05
NUAK2	1.27974	5.9318	3.59954e-07	8.53482e-05
EFHB	1.1332	3.78168	2.35768e-06	0.000238642
ADAMTS9	1.4183	5.15784	8.99626e-07	0.000140578
TIPARP	1.23219	6.27278	6.54884e-08	4.06042e-05
PTX3	-1.6059	3.55734	1.22669e-06	0.000158581
PCOLCE2	-1.49397	3.75078	1.85453e-05	0.000785197
CXCL5	-2.31845	3.33958	1.00358e-07	4.64483e-05
PRKCD	1.03252	3.31408	9.28765e-07	0.000142747
PLXNB1	1.16757	3.11821	2.76058e-06	0.000263166
ASB5	-1.69839	3.6305	2.62941e-07	7.2795e-05
ERAP2	1.12667	6.53317	7.88309e-08	4.30587e-05
CITED2	1.09888	7.58939	6.05231e-07	0.000112908
DCBLD1	-1.01192	3.89928	1.26205e-05	0.000616217
COL1A2	-1.79374	7.5807	8.97676e-11	1.8142e-06
TMEM184A	1.00733	3.88037	9.37928e-05	0.00224591
PDP1	1.27048	7.01382	4.83822e-07	9.87682e-05
ALDH1A1	-1.08944	9.2691	2.0222e-08	2.58611e-05
RASEF	1.8402	3.0532	1.04392e-06	0.000148924
DACT1	2.2257	3.48298	5.77744e-07	0.000109464
BEND7	1.20255	3.99125	9.70015e-07	0.000144512
CLMN	2.76437	5.22122	7.75913e-09	1.80937e-05
SMPD1	-1.03437	3.72041	7.66603e-07	0.000128042
PLEKHA7	1.2328	3.69475	1.40692e-05	0.000658192
NNMT	1.31999	5.61815	3.23464e-06	0.000279383
SLFN5	-1.40575	3.50717	1.78689e-05	0.000769389
GPRC5B	-1.15891	3.1962	3.71616e-06	0.000303653
AXL	1.07856	9.69586	4.29749e-08	3.56927e-05
KRT80	1.31788	6.85261	9.29989e-07	0.000142747
ANGPTL4	-1.75649	6.04009	7.33135e-06	0.000442294
CAVIN2	1.65988	5.62363	5.50273e-07	0.000105579
MTCL1	1.67337	7.16922	9.88183e-08	4.64446e-05
SERINC2	1.11885	3.28554	5.287e-05	0.00153007
LRATD2	1.70758	3.91891	8.266e-07	0.000133645
ZNF608	1.15596	6.09489	2.79246e-06	0.00026396
EFNA1	1.07796	3.35687	6.15532e-05	0.00169481
ADRB2	1.17017	4.04876	7.04519e-06	0.000431029
SDC2	1.34838	5.5497	1.02246e-07	4.6886e-05
KLF13	1.11352	3.94047	2.49137e-06	0.00024587
ADRA1B	1.62281	6.05659	8.62006e-08	4.44685e-05
CDH2	2.09717	6.91895	7.7563e-11	1.8142e-06
AC093323.3	-1.03242	4.34698	1.48427e-05	0.000679802
MRPL36	-1.09825	3.78539	7.6862e-06	0.000455537
TLN2	1.79873	4.54288	1.03666e-06	0.000148924
SNTB1	2.30263	3.38106	1.3827e-08	2.29678e-05
TRMT112	-1.00194	6.42823	6.50703e-06	0.000411818
ESRRA	-1.12574	4.14409	6.75876e-06	0.000420723
ABLIM3	1.21317	3.84615	2.02009e-06	0.000213376
MICOS10	-1.16977	5.85829	3.87695e-05	0.00126037
NABP1	1.42233	6.02976	8.89292e-06	0.000496023
B4GAT1	-1.19845	5.4029	6.56311e-08	4.06042e-05
ADGRE1	-1.29261	3.42598	2.4584e-06	0.000243949
CCDC14	1.17997	5.36596	1.21417e-06	0.000157634
NR2F1	-1.44305	4.81334	1.08339e-06	0.000150995
BAIAP2	1.4444	5.70794	1.92127e-07	6.35643e-05
JAKMIP2	1.13133	5.07769	4.92395e-06	0.000351569
COX8A	-1.11679	6.80323	9.69345e-05	0.00230386
MYO1D	-1.51986	5.95718	4.01784e-07	8.92314e-05
IRX3	-1.0144	4.27203	2.09547e-05	0.000849193
FAM20C	1.59375	3.26303	2.67785e-06	0.00025649
TENM3-AS1	-1.04578	3.39082	5.74598e-06	0.000385089
EXOSC4	-1.06142	4.34447	2.23636e-07	6.74702e-05
ARID3B	1.1872	4.37073	6.21065e-08	4.04895e-05
TSHZ1	1.20104	3.09439	2.38483e-06	0.000239539
ALX1	-1.29671	3.87529	6.77779e-07	0.000121378
H2AC6	1.47277	4.72647	3.60901e-06	0.000298927
SHISA2	1.04815	6.87437	9.68892e-08	4.60988e-05
FAM89A	1.43275	4.10027	8.86658e-08	4.4768e-05
KCNIP1	2.32203	3.035	1.27069e-06	0.000162194
AP1S2	1.28088	4.87438	8.98531e-05	0.00218524
PLCB1	1.22325	3.90272	5.7504e-05	0.00162011
NDN	-1.33902	3.58383	1.42055e-05	0.000660357
PAPPA	1.20899	6.57642	1.18277e-07	4.84418e-05
GAS6	1.24876	5.59374	5.14541e-06	0.000361072
GPC6	1.7913	3.91551	2.04951e-08	2.58611e-05
PRR36	1.44621	3.01872	0.000159787	0.0032336
CCBE1	-1.11255	3.22972	4.49892e-07	9.53739e-05
IQGAP3	1.20057	6.44849	1.35933e-06	0.000169797
H2BC21	1.34542	3.95589	1.08368e-07	4.78198e-05
IFITM2	-2.48466	3.85483	1.19047e-07	4.84418e-05
TNFAIP2	1.69609	3.69605	5.53481e-06	0.000378702
OLFML2A	1.95441	5.01863	1.38734e-07	5.37698e-05
PBX1	1.01002	3.67686	8.07293e-07	0.000131578
ADAMTSL5	1.12909	3.53126	8.4512e-05	0.00209826
IRS2	1.09021	4.81127	8.67133e-05	0.00213708
SAPCD2	1.20239	5.35581	4.16236e-05	0.00131775
THBS2	-2.65466	4.32788	1.24086e-07	4.95152e-05
SMIM29	-1.02261	4.55798	3.74588e-05	0.00123498
TRABD2A	-1.24881	4.05218	2.48132e-05	0.000943128
PCDHB13	-1.82499	3.11901	1.17529e-07	4.84418e-05
H1-2	1.01816	5.85397	1.13873e-06	0.000153084
DNER	-1.51369	4.03502	5.58359e-07	0.000106457
LINC00265	1.44694	3.24181	2.39937e-05	0.000926404
NANOS1	1.62045	3.01593	1.44253e-06	0.000173189
DPY19L2P1	1.1282	3.50539	4.88112e-05	0.0014538
AJAP1	1.19039	3.1755	9.2301e-06	0.000508284
MMP1	-3.84866	9.98613	7.81987e-12	4.74119e-07
ADA	-1.00697	6.38454	1.48099e-06	0.000176063
ARRDC1	1.01038	3.2628	9.48594e-05	0.00226519
SLC22A5	1.10749	4.30454	8.08048e-07	0.000131578
H2BC12	1.5804	5.85422	2.16407e-07	6.64763e-05
MBP	1.02161	3.25351	8.86237e-05	0.00217101
TOR4A	-1.02717	4.86215	3.89763e-05	0.00126249
PHETA1	-1.43654	3.02972	1.09782e-06	0.000150995
TCAF1	1.046	4.81687	9.91837e-06	0.000533651
TXNRD1	-1.0918	8.65371	8.88509e-08	4.4768e-05
ITGBL1	-1.31346	5.46511	7.3079e-06	0.000442294
TAFA2	-2.48286	3.14123	1.00328e-06	0.000146492
ALPK2	1.01569	6.82478	1.90922e-06	0.000205972
DMD	-1.05927	3.86737	1.26798e-05	0.000617244
LINC00632	1.25756	3.71416	1.14849e-05	0.000581727
OXLD1	-1.05904	4.55566	9.14072e-06	0.000504278
COL5A2	-1.57028	5.55571	2.87473e-07	7.51271e-05
CKLF	-1.02808	5.46064	2.75218e-05	0.00100219
TENM3	-1.06581	5.98133	1.23701e-07	4.95152e-05
CEBPD	1.13771	3.26444	6.02958e-05	0.00166852
LINC00511	1.16408	4.24248	1.06877e-07	4.76468e-05
IMPDH1P10	1.16851	3.31986	2.12965e-05	0.000858516
LINC00665	-1.11004	4.8855	4.94018e-08	3.69781e-05
LINC00342	1.70364	3.42898	4.06977e-05	0.00130319
RPL6P27	-1.13538	4.92157	0.000205516	0.0038709
C4orf48	-1.17335	3.29103	1.07961e-05	0.000560918
H2AJ	-1.34368	5.48187	5.17203e-06	0.000362227
LINC02511	-2.98857	3.5683	2.75238e-08	2.82842e-05
RP11-20D14.6	-1.81567	3.34847	8.31962e-07	0.000134154
TMEM158	-1.81171	5.47693	8.64021e-07	0.000137906
SELENOP	-2.29863	4.21545	1.04289e-06	0.000148924
MIR100HG	-1.35781	3.10482	4.1903e-05	0.00132322
RP11-553L6.5	1.0459	4.48756	0.000379094	0.00595607
RP11-159D12.2	1.5437	3.13458	6.25056e-06	0.000405843
BAHCC1	-2.0022	4.5113	1.14466e-05	0.000581069
RP11-1151B14.4	1.19627	4.35687	4.27683e-06	0.000326169
MIR222HG	1.58362	3.344	9.60272e-07	0.000144512
TAF15	-1.78504	5.65599	1.07134e-05	0.000558998
CD24	3.3677	7.84181	1.55313e-10	2.35415e-06
PRAG1	1.18628	4.38634	1.71228e-05	0.000748997
H4C9	1.2741	3.7028	7.31422e-06	0.000442294
RP11-394B2.1	1.07156	4.49264	4.97494e-05	0.00147137
CDC42-AS1	-1.00576	3.33947	0.000328253	0.00539056
RP11-496O3.3	-1.24572	3.40334	4.0519e-06	0.000316581

## Sheet: JHH7-LR vs. JHH7-WT
Symbol	log2FC	AveExpr	P.Value	adj.P.Val
TSPAN6	1.14556	7.11455	4.24518e-11	6.02775e-09
M6PR	1.12858	6.68846	8.52911e-11	1.03012e-08
PLXND1	-1.02901	7.09008	2.22239e-09	1.32622e-07
FKBP4	2.02816	6.63934	6.01872e-14	3.64915e-11
SLC25A5	1.54457	9.63239	1.61034e-15	2.21897e-12
TMEM98	1.00567	6.18153	1.58993e-09	1.02008e-07
USH1C	1.73619	6.04261	2.81108e-12	7.04281e-10
IFRD1	-1.23094	7.28731	1.58715e-11	2.87933e-09
ADIPOR2	1.45333	7.16977	1.43377e-13	6.58556e-11
MGST1	1.27355	7.13281	2.43915e-11	3.902e-09
PKD1	-1.16926	6.75362	4.06946e-10	3.49974e-08
HIVEP2	-1.06337	6.16268	6.86693e-09	3.26031e-07
CLCN6	-1.35494	6.74331	3.46689e-12	8.37441e-10
NME1-NME2	1.47417	6.25831	5.92975e-08	1.93707e-06
PSMC4	1.23356	7.25643	5.07886e-11	6.96678e-09
NUDCD3	1.01178	6.38332	3.98177e-09	2.11767e-07
STRAP	1.09336	7.43309	6.59166e-11	8.52138e-09
NCAPH2	1.06181	6.01401	3.61238e-07	8.76075e-06
IFNGR1	-1.14566	7.20871	1.92607e-10	1.98629e-08
HMGB3	1.13938	6.20929	1.4521e-10	1.58632e-08
ABCF2	1.11672	6.88785	1.92289e-10	1.98629e-08
TMSB10	1.14543	7.85609	6.11508e-06	9.68794e-05
AGA	-1.14597	6.03339	3.48288e-10	3.14236e-08
MAT2B	1.22518	6.10982	9.79554e-11	1.14794e-08
H6PD	-1.00538	7.35173	1.45765e-10	1.58774e-08
TAB2	-1.04994	7.65577	7.43602e-08	2.34084e-06
PKP2	1.42743	6.06103	9.12431e-12	1.85019e-09
ZC3H11A	-1.49651	6.55521	6.13338e-05	0.000699392
OGFR	1.11134	6.04216	4.37704e-07	1.02542e-05
MRPS35	1.03658	6.49885	2.01088e-09	1.22779e-07
U2AF2	1.22495	7.45635	3.93043e-09	2.09773e-07
HIPK2	1.34154	7.01665	2.78281e-12	7.02929e-10
OAT	1.07482	6.66504	1.77491e-10	1.86827e-08
NDUFB4	1.30833	6.11332	1.43223e-08	5.99282e-07
ME1	-1.15409	6.93877	1.0034e-09	7.01183e-08
NEO1	1.33575	6.17367	1.10455e-10	1.26452e-08
DHX8	1.08807	6.98521	4.93706e-10	4.05053e-08
FGFR3	1.08892	7.05771	1.91482e-10	1.98454e-08
LRP6	1.03706	6.88362	8.96583e-10	6.40281e-08
PTPN3	-1.08507	6.86333	2.07678e-10	2.08469e-08
ASNS	-1.43404	8.72214	6.6224e-12	1.4039e-09
SEL1L	-1.15142	7.55426	1.26823e-09	8.46834e-08
MBD3	1.35067	6.0295	1.16085e-08	5.05255e-07
AP1M1	1.05371	6.22471	3.97941e-09	2.11767e-07
MCM2	1.3289	8.04449	1.44574e-12	4.09603e-10
KDM5A	1.22049	6.00811	1.75209e-10	1.84748e-08
MRPS34	1.64841	6.34121	1.71427e-09	1.08186e-07
MGLL	1.56693	6.60146	3.67515e-12	8.84223e-10
HACD3	1.29253	7.88112	6.08177e-12	1.32164e-09
TTC38	1.52579	6.48925	8.82226e-13	2.80049e-10
SLC46A1	1.31411	6.39999	6.32169e-10	4.93923e-08
CAPN6	1.02525	6.28989	7.40362e-09	3.46894e-07
KIF22	1.10781	6.94938	4.77264e-10	3.96391e-08
AFP	4.69224	9.3769	1.4371e-22	8.71313e-18
OXCT1	-1.10938	6.0007	8.111e-10	5.96808e-08
WBP11	1.06987	7.35941	7.68077e-11	9.48443e-09
CD59	1.48029	6.37739	8.5974e-13	2.77266e-10
DNAJA1	1.17153	6.39725	5.80269e-11	7.74928e-09
SEPHS1	1.18371	7.18502	1.23366e-11	2.36699e-09
SRRT	1.38272	6.79586	8.27846e-11	1.00991e-08
PSMC5	1.04658	7.61013	4.30348e-09	2.24351e-07
SH3BP2	-1.84637	6.2423	1.05569e-13	5.33386e-11
KHSRP	1.2774	8.32002	9.51598e-13	2.97399e-10
GNA11	1.14273	6.8195	3.58193e-10	3.18902e-08
DYNLL1	1.24944	6.4358	2.25161e-10	2.23358e-08
PEBP1	1.01285	8.72758	1.27304e-11	2.41958e-09
FUS	1.18806	8.23636	1.47768e-10	1.60271e-08
MLF2	1.32091	7.02944	4.02206e-11	5.76495e-09
NUDC	1.75672	7.10719	3.20554e-11	4.87098e-09
NRCAM	-1.94714	7.142	6.804e-13	2.28415e-10
PSME1	1.09812	6.51206	8.32533e-08	2.55966e-06
MYL6	1.5205	7.43318	1.97996e-08	7.77739e-07
SH3GLB1	-1.71217	6.87615	4.05758e-13	1.50927e-10
CIRBP	1.08072	6.53749	2.31421e-06	4.21986e-05
HNRNPM	1.24588	8.17288	4.24382e-10	3.60874e-08
POLR2E	1.21857	6.69646	1.63699e-09	1.04582e-07
RANBP1	1.57803	8.09281	1.85772e-13	8.16186e-11
SNRPD3	1.17473	7.16118	1.13875e-10	1.2948e-08
PES1	1.03368	7.16152	8.76588e-09	3.97216e-07
HIRA	1.24199	6.92938	1.343e-11	2.50708e-09
MICALL1	-1.02547	6.0738	9.74823e-09	4.35867e-07
TIMP3	1.01057	7.06176	3.37138e-10	3.07379e-08
MCM5	1.13454	7.47446	3.9897e-10	3.45565e-08
POLR3H	1.54083	6.38612	4.66817e-11	6.50646e-09
ERH	1.03952	6.99437	1.57492e-07	4.35023e-06
APEX1	1.00024	8.02812	4.43028e-08	1.51842e-06
MYBL2	1.12163	7.78717	4.22912e-11	6.02775e-09
HNF4A	1.78162	6.87724	7.36454e-14	4.21238e-11
RAB5IF	1.16492	6.85092	7.93889e-10	5.88391e-08
PSMA7	1.01324	8.03911	2.30342e-06	4.20651e-05
TRIB3	-1.65127	8.74397	3.61592e-15	4.38466e-12
CST3	1.10042	7.22235	6.04567e-09	2.96561e-07
RBBP7	1.04099	7.50567	3.42083e-11	5.1085e-09
PGK1	1.09057	9.57235	6.0051e-11	7.96694e-09
RBM3	1.1034	8.24981	1.75892e-11	3.07329e-09
NUTF2	1.33478	6.63351	7.94811e-11	9.75494e-09
MMP15	1.15478	6.08802	9.2105e-10	6.54669e-08
CYB5B	1.26412	7.60911	9.9325e-13	3.05689e-10
STUB1	1.01333	6.14731	1.67849e-07	4.59236e-06
CAPN15	1.18003	6.11319	7.88773e-09	3.63675e-07
TOX3	-1.25446	6.25609	2.53539e-09	1.4668e-07
MCM4	1.21599	6.85991	1.8125e-11	3.11561e-09
SF3A2	1.08507	6.52403	4.71876e-08	1.60279e-06
OAZ1	1.702	8.61587	3.11886e-11	4.76314e-09
PTOV1	1.49235	6.75754	3.91013e-12	9.15332e-10
ASF1B	1.21956	6.19537	2.26895e-10	2.24415e-08
FAM32A	1.30381	6.0111	1.80485e-10	1.88751e-08
FBL	1.24427	7.87518	1.32317e-07	3.72965e-06
PLD3	-1.07856	6.78883	1.16446e-09	7.88837e-08
RPS19	1.1889	8.92235	0.000141141	0.00143749
ETFB	1.26854	7.13391	1.19677e-05	0.000171887
CDC37	1.31316	6.31879	5.85732e-09	2.88488e-07
H2AZ2	1.35941	7.51171	4.88592e-12	1.10535e-09
CHCHD2	1.21399	8.33215	2.9117e-09	1.64833e-07
EIF3B	1.76054	8.24144	5.9566e-15	6.2267e-12
ZNHIT1	1.12004	6.23132	2.39589e-07	6.1908e-06
PSMA2	1.08697	6.92091	2.03385e-09	1.23807e-07
AKNA	-1.34742	6.10196	2.86762e-11	4.48072e-09
DKK1	-1.68522	6.10793	4.19861e-13	1.5428e-10
UBTF	1.04697	6.64386	7.35068e-10	5.56394e-08
CBX1	1.61502	7.04658	1.7758e-12	4.93884e-10
AKAP10	-1.04409	6.91012	4.12256e-09	2.16783e-07
EFTUD2	1.11547	7.98993	6.35838e-12	1.37682e-09
VTN	2.8818	6.55246	8.84256e-17	2.54253e-13
HSPA8	1.63215	9.05004	1.15526e-13	5.56638e-11
CCND1	2.79145	7.72557	6.36546e-19	6.43229e-15
CCDC86	1.55078	6.40946	6.7613e-11	8.68512e-09
PRPF19	1.08622	7.72984	9.82651e-11	1.14794e-08
CORO1C	1.01849	7.38017	5.66636e-11	7.63448e-09
FOXM1	1.40513	7.91405	6.08984e-14	3.65571e-11
MRPL51	1.51193	6.35917	4.84813e-10	4.00466e-08
GAPDH	1.48794	11.8203	7.84776e-16	1.30241e-12
NOP2	1.66074	6.16677	9.31692e-11	1.10114e-08
CHPT1	1.03813	6.23471	1.51586e-09	9.81911e-08
USP5	2.01083	6.8023	1.578e-13	7.13988e-11
TPI1	2.29427	8.91048	3.92439e-16	7.43549e-13
LPCAT3	1.21298	6.0709	6.39764e-10	4.98572e-08
C2CD5	1.23155	6.40998	3.74225e-10	3.29381e-08
COX6A1	1.34888	7.621	3.56055e-06	6.09647e-05
PPARD	-1.10193	6.21627	6.61956e-10	5.09967e-08
SRSF3	1.13106	8.31152	1.94719e-10	1.99422e-08
MCM3	1.22473	7.69784	4.97896e-12	1.11805e-09
ARFGEF3	-2.03393	7.0656	8.03323e-15	7.49315e-12
COX7A2	1.12243	6.50202	3.58003e-06	6.12292e-05
KIF20A	1.1284	6.52891	3.25121e-10	3.00489e-08
LMNB1	1.1225	7.45708	8.87515e-12	1.80571e-09
RTKN	1.06194	6.02378	4.55028e-09	2.33602e-07
RPS15	1.73146	7.52105	1.60393e-08	6.56182e-07
HSPE1	1.79394	6.95111	7.77495e-10	5.8197e-08
SRSF7	1.14209	6.93137	3.03278e-10	2.84397e-08
SLC1A4	-1.0882	6.90914	5.95339e-10	4.70605e-08
CACYBP	1.40523	6.30668	9.18937e-12	1.85717e-09
ERRFI1	-1.00594	7.9909	7.33192e-11	9.22271e-09
HDAC1	1.33644	7.69496	1.60044e-11	2.88795e-09
ARHGEF2	-1.77341	7.40103	1.14596e-13	5.56638e-11
CTH	-1.58723	6.27977	1.49056e-12	4.20337e-10
KIF21B	-1.05876	6.19944	1.12319e-09	7.68614e-08
CDC20	1.67063	6.53713	2.75919e-13	1.13033e-10
STMN1	1.19436	8.27079	1.41266e-12	4.03419e-10
APOA1	4.52084	6.57311	5.49255e-16	9.79451e-13
ATF6	-1.26575	6.57479	9.06316e-10	6.4571e-08
ELL2	-1.13368	8.26469	1.04167e-10	1.2007e-08
RHOQ	-1.02074	6.59338	1.28947e-07	3.65725e-06
GPAM	-1.95748	9.46837	7.23474e-15	6.85378e-12
UTP20	1.33286	6.15669	3.74346e-10	3.29381e-08
TMPO	1.26347	8.02529	4.92369e-08	1.66123e-06
TARDBP	1.11759	7.21743	2.70463e-10	2.59465e-08
AKAP1	1.10685	6.71293	6.18393e-11	8.07269e-09
COPA	-1.09117	8.53898	6.87285e-13	2.28957e-10
ATP7B	1.00688	6.27233	1.76838e-09	1.10761e-07
TUBA1B	1.44616	11.0872	2.07811e-15	2.73905e-12
ACSL3	-1.17047	7.93722	4.96217e-12	1.11805e-09
PEPD	1.26347	6.0076	2.00185e-09	1.22431e-07
SNRPD2	1.41834	6.76615	5.0914e-07	1.16575e-05
SNRPB	1.3889	8.33513	1.36474e-08	5.7541e-07
NCLN	1.56692	6.30472	3.49725e-11	5.20978e-09
HNRNPR	1.03094	8.03856	5.81697e-11	7.75128e-09
CAPNS1	1.23446	7.01289	3.21406e-11	4.8717e-09
COX6B1	1.58304	6.57915	2.96701e-08	1.08695e-06
PRMT1	1.61128	8.00257	2.20626e-11	3.63493e-09
ZNF384	1.18718	6.12197	8.54164e-08	2.6116e-06
EMG1	1.36898	6.69421	2.25725e-11	3.70887e-09
HNRNPH2	1.45625	6.12447	5.71626e-12	1.25571e-09
LRRC61	1.18225	6.20275	2.02389e-09	1.23449e-07
TUBBP1	1.28011	7.09244	9.81519e-11	1.14794e-08
AAMP	1.17623	6.42775	2.33441e-07	6.06407e-06
SEM1	1.00886	6.46556	5.47003e-05	0.00063449
PAICS	1.07253	7.6942	5.332e-10	4.31039e-08
NEDD8	1.02072	6.1622	4.50294e-06	7.45326e-05
LDLR	-1.6133	8.28472	5.82907e-15	6.2267e-12
RPL36	1.29174	6.81091	6.19356e-06	9.76125e-05
ACTN4	1.19313	9.24863	4.43823e-13	1.60173e-10
GDF15	-2.62644	7.40398	1.53512e-15	2.21605e-12
LSM4	1.08907	7.38021	1.1747e-07	3.3883e-06
EIF3G	1.24821	6.79951	5.97107e-09	2.93376e-07
DUSP9	1.41264	7.3475	1.13291e-11	2.21053e-09
ACSS2	-1.06624	7.04738	1.5143e-10	1.63366e-08
PYY	3.58551	6.28462	1.36581e-16	3.42787e-13
COX7B	1.45036	6.80611	1.84979e-12	5.12113e-10
PRKAB2	-1.11582	6.57455	2.30476e-09	1.36561e-07
RHPN2	1.14733	6.033	1.99891e-10	2.02327e-08
ENOSF1	1.01765	6.62282	2.91972e-07	7.27589e-06
RAN	1.4527	8.68438	1.15679e-13	5.56638e-11
CLUH	1.08202	6.98903	2.47931e-09	1.4371e-07
PCNA	1.68942	7.23987	1.76533e-14	1.32138e-11
CNDP2	1.07767	6.35119	6.11049e-09	2.98533e-07
NTS	-1.18789	6.68611	1.36753e-10	1.51856e-08
BHLHE40	-1.3489	6.34096	1.13753e-11	2.21053e-09
LAMTOR5	1.09836	6.06873	1.07243e-05	0.000156817
MYCN	1.8967	6.99457	1.01815e-13	5.27611e-11
LDHA	1.64069	9.53757	1.05791e-15	1.60353e-12
TES	-1.10944	7.84393	3.86959e-12	9.15332e-10
CDK4	1.14014	8.06154	1.74305e-09	1.09514e-07
ESPL1	1.16987	6.75897	8.27537e-11	1.00991e-08
ACVR1B	1.49836	6.20044	1.37091e-12	3.93924e-10
SMYD5	1.03776	6.12408	3.60687e-09	1.95254e-07
SLC19A3	1.53479	7.46661	6.40665e-14	3.7438e-11
EIF4E2	1.00465	6.17334	5.41927e-09	2.70206e-07
TBC1D4	1.13503	6.41238	4.03439e-09	2.13405e-07
LMO7	1.08387	6.60828	1.10306e-09	7.57404e-08
SPRY2	1.73906	6.15462	1.0674e-13	5.34849e-11
LCP1	-3.585	7.91906	7.8425e-19	6.79272e-15
TBRG4	1.27823	6.6425	1.20641e-10	1.35704e-08
DDX56	1.07697	6.33043	5.81924e-10	4.63019e-08
BIN1	1.09937	6.82627	1.09238e-08	4.81331e-07
TXN	1.02478	7.28727	1.639e-09	1.04582e-07
MYC	-1.09607	6.63268	4.39965e-09	2.2797e-07
CENPO	1.04911	6.58536	3.74871e-10	3.29381e-08
ITGAV	-1.05809	6.60886	7.28865e-10	5.52389e-08
USO1	-1.0478	6.55324	3.51107e-08	1.25888e-06
MTTP	2.84556	6.0175	1.35968e-14	1.0847e-11
SINHCAF	1.13138	7.25097	5.9834e-11	7.95556e-09
ETNK1	1.82143	6.4527	2.135e-13	9.24606e-11
NDUFA9	1.84641	6.02259	3.40727e-13	1.29114e-10
CLSTN3	1.10031	6.10504	9.65939e-10	6.80987e-08
COL2A1	6.33594	7.74813	9.78311e-22	2.96575e-17
INHBE	-2.68614	6.83059	6.60584e-17	2.10796e-13
GLIPR1	1.34692	6.59001	7.59402e-11	9.45803e-09
SLC7A1	-1.23	8.17111	6.76013e-13	2.28415e-10
NABP2	1.13741	6.19717	1.28708e-08	5.48005e-07
WARS1	-1.35773	7.01212	3.22839e-12	7.92459e-10
SORD	1.55618	6.96775	2.87489e-13	1.15398e-10
CYP1A1	-1.0137	6.57473	4.4554e-09	2.29508e-07
MAP1LC3B	-1.13388	6.82427	3.28914e-09	1.81953e-07
ARHGDIA	1.64222	7.34447	2.38744e-11	3.86001e-09
CBX4	-1.49943	6.70722	1.33106e-11	2.50129e-09
PFKL	1.45211	6.30629	7.61401e-11	9.45803e-09
SH3GL1	1.04936	6.72329	6.09163e-08	1.98165e-06
HAX1	-1.08601	6.94419	1.96892e-10	2.00197e-08
PARP1	1.04281	8.57098	6.60122e-12	1.4039e-09
SNRPG	1.22026	6.13028	1.20888e-06	2.43019e-05
CDCA7	1.16977	6.28554	1.81533e-10	1.89425e-08
AHSG	1.81311	6.58339	2.47558e-14	1.76582e-11
SKP2	1.24334	7.00763	3.26026e-11	4.91716e-09
OSMR	-1.71563	6.33036	2.2674e-11	3.71547e-09
NHP2	1.03041	6.61762	4.52667e-06	7.48017e-05
CDCA5	1.03892	6.72801	8.66059e-10	6.22917e-08
NDUFB9	1.17783	7.34409	6.05139e-09	2.96601e-07
GTF3C5	1.15456	6.2433	6.1751e-10	4.84969e-08
PTGES2	1.32819	6.01512	9.78197e-09	4.36471e-07
FAM171A1	1.36454	6.172	8.35607e-12	1.71158e-09
GSTO1	1.11166	6.10082	3.30701e-07	8.1143e-06
SERPING1	-2.34604	6.87066	1.53905e-14	1.19631e-11
INCENP	1.52191	6.94117	4.84803e-13	1.71892e-10
FAU	1.31775	7.68939	2.62881e-05	0.000338181
ALDOA	1.14047	9.11899	1.00195e-07	2.97349e-06
MIA2	-1.07536	7.70958	1.68496e-09	1.06749e-07
CDC123	1.11253	6.95217	3.07584e-11	4.73221e-09
AKR1C2	-1.08604	6.07951	4.34341e-09	2.26044e-07
ACSL1	-1.24703	8.14875	3.36915e-13	1.29114e-10
MZT2B	1.03119	6.19612	0.000181132	0.00178164
ZFP36L2	1.41196	7.31895	3.27404e-12	8.00424e-10
UBP1	1.08488	6.07819	8.57967e-10	6.19427e-08
DDAH1	1.31135	6.09581	7.84767e-10	5.85965e-08
MIA3	-1.06868	6.80167	7.51239e-10	5.65107e-08
ATP5MC3	1.10547	7.12073	2.68467e-07	6.78779e-06
DBI	1.00027	7.19294	1.1027e-06	2.25486e-05
UGT2B4	-1.16386	6.15322	7.21734e-10	5.49043e-08
SEC13	1.34182	6.55292	2.05503e-10	2.06971e-08
ST3GAL2	1.41234	6.58393	2.66803e-11	4.21257e-09
TMEM164	1.03475	6.49352	6.76531e-10	5.20213e-08
CCAR2	1.07987	7.1009	6.12528e-10	4.82306e-08
ATP5MC1	1.38893	6.05321	5.11734e-09	2.57267e-07
PTMS	1.94239	6.75198	2.26077e-08	8.67536e-07
SAFB	1.25392	6.68282	5.96188e-10	4.70663e-08
SHC1	-1.35089	7.0819	2.08464e-12	5.66473e-10
PPP1R16A	1.34266	6.05784	3.65754e-10	3.2279e-08
SRSF2	1.89176	7.35751	9.63971e-14	5.04906e-11
ITGA5	-3.48215	6.115	2.54047e-18	1.71143e-14
RAVER1	1.07755	6.49606	6.72875e-09	3.21232e-07
JMJD8	1.1494	6.19962	2.68308e-09	1.54048e-07
RPL29	1.10035	7.84366	1.8723e-06	3.52649e-05
TPCN2	1.38138	6.38241	4.83157e-11	6.68809e-09
FGF19	-3.60961	7.76548	4.27153e-21	8.63275e-17
FBLIM1	-1.49574	6.83746	5.30963e-12	1.17063e-09
RBBP4	1.07816	7.88667	1.81833e-10	1.89425e-08
PEA15	-1.06388	6.93327	1.51755e-10	1.63426e-08
PKDCC	2.45314	6.03376	4.45405e-15	4.90999e-12
FABP1	1.50482	7.11348	2.00474e-08	7.84178e-07
H2AZ1	1.25091	8.49444	7.60475e-08	2.37791e-06
MAD2L1	1.47212	6.00341	1.39728e-10	1.54594e-08
RHOBTB3	-1.0511	7.16901	1.39896e-09	9.17952e-08
CFAP97	-1.00259	7.13465	3.61554e-09	1.95319e-07
SLC4A2	1.0334	7.65211	4.16515e-09	2.18643e-07
ALDH1A1	1.13153	8.57378	7.79354e-13	2.56806e-10
VCP	1.15671	8.27924	1.23317e-11	2.36699e-09
NUDT5	1.26164	6.63386	3.14958e-10	2.92434e-08
PSMC3	1.18634	7.25596	5.0456e-07	1.15733e-05
NDUFB8	1.60666	6.88945	2.08448e-07	5.51368e-06
CKB	1.66473	7.94321	5.78185e-12	1.26098e-09
API5	1.05503	7.10836	4.15463e-10	3.55765e-08
RPL27A	1.11492	9.40851	1.29447e-06	2.57747e-05
MCM7	1.36157	9.05458	1.86275e-11	3.17244e-09
ANPEP	1.05072	6.71475	2.84515e-10	2.70802e-08
PHB	1.13306	8.17317	2.64218e-08	9.89471e-07
SNRPD1	1.22009	6.37436	4.53198e-10	3.8163e-08
ACAA2	1.07252	6.36559	9.5762e-10	6.75908e-08
TUBA1A	1.15978	6.22878	4.14307e-08	1.44116e-06
CHAF1A	1.26659	6.19921	3.14419e-10	2.92381e-08
TK1	1.01605	6.45911	3.92869e-07	9.38891e-06
FEN1	1.48979	6.31247	2.48848e-11	3.97044e-09
NDUFS5	1.20759	6.80393	2.55019e-07	6.51022e-06
ATF5	-3.4621	6.67368	7.85619e-17	2.3816e-13
PRELID1	1.36192	7.64317	3.28343e-09	1.81953e-07
SDC2	1.03545	6.20723	8.08595e-10	5.96413e-08
FASN	-1.23658	11.0518	3.98137e-12	9.28425e-10
TM4SF1	1.59073	6.38512	2.43956e-12	6.34809e-10
HOXB9	-2.03658	6.2696	2.81893e-14	1.89902e-11
PGAM1	1.31267	8.09077	2.74618e-12	6.97823e-10
FGA	-1.3516	7.53294	3.98543e-13	1.50085e-10
RRM2	1.55852	7.58611	6.42183e-14	3.7438e-11
RPS21	1.16501	8.19218	0.00045732	0.00398095
RPS7	1.17759	9.28273	8.69115e-10	6.23603e-08
RNASEH1	1.18922	6.3435	9.61321e-11	1.13175e-08
CYCS	1.17338	7.28598	5.63529e-07	1.26963e-05
BSG	1.36715	8.95678	2.80279e-09	1.59862e-07
GTPBP2	-1.43801	6.91753	3.82644e-12	9.13373e-10
TRMT112	1.03144	6.37405	3.33312e-06	5.76567e-05
UQCRH	1.13313	6.94727	1.25246e-07	3.57854e-06
MUC13	1.1347	6.35788	5.27238e-10	4.27359e-08
CNP	1.05823	6.89142	1.50004e-10	1.62117e-08
DDX23	1.10657	6.55132	8.63407e-10	6.22454e-08
MRPL11	1.11061	6.13035	1.29947e-08	5.52501e-07
UBE2C	1.3248	6.37821	5.18224e-11	7.03555e-09
ETV4	1.33088	8.1424	3.3723e-13	1.29114e-10
COX8A	1.04154	6.91898	5.22972e-05	0.000610705
LMNB2	1.84954	7.08055	3.90604e-12	9.15332e-10
TYMS	1.42183	7.60195	2.18073e-13	9.37677e-11
POLE	1.55188	6.28237	6.81893e-13	2.28415e-10
RPLP2	1.03202	8.43514	1.04444e-05	0.000153242
JUN	1.32787	6.39188	3.75396e-10	3.29381e-08
HNRNPA0	1.47452	7.64084	4.50477e-09	2.31657e-07
UBE2N	1.20401	6.757	1.9093e-11	3.23355e-09
ERN1	-2.11317	6.07462	3.21476e-14	2.1186e-11
EIF3K	1.05216	6.7012	1.61358e-07	4.44891e-06
AURKB	1.19694	6.37089	4.11746e-09	2.16703e-07
RCC1	1.34661	6.78823	4.72779e-11	6.56901e-09
NQO1	-2.11803	7.94945	1.72822e-16	4.03008e-13
COL18A1	2.48612	6.96524	5.25141e-14	3.2824e-11
SF3A3	1.32141	6.92065	2.58336e-12	6.67769e-10
ALYREF	1.42826	6.54773	9.77301e-09	4.36471e-07
UQCR10	1.24957	6.60039	4.78149e-10	3.96582e-08
BRI3BP	1.33341	6.19106	3.0876e-11	4.73221e-09
BCAP31	1.02904	7.30258	6.89917e-07	1.51119e-05
NDUFA13	1.46962	6.28326	1.22107e-06	2.4482e-05
SAPCD2	1.90778	6.28532	1.06676e-12	3.25013e-10
PTMA	1.37855	8.98635	5.00136e-13	1.76298e-10
MCRS1	1.11946	6.04956	2.49182e-08	9.41888e-07
TUBB4B	2.2087	7.71512	2.76917e-15	3.57223e-12
SERPINA5	1.01602	7.19668	3.64925e-10	3.22528e-08
NDUFA4	1.38597	7.13554	1.82049e-09	1.13439e-07
H1-0	-1.31497	9.63035	1.66166e-09	1.05604e-07
HMGB1	1.21509	8.15706	4.0683e-12	9.41455e-10
TUBB	1.56306	7.41922	5.06996e-11	6.96678e-09
PPIA	1.00763	10.2505	8.15e-10	5.98092e-08
MRPL21	1.34294	6.82945	8.66104e-10	6.22917e-08
GSTK1	1.21251	6.19308	2.71453e-10	2.60003e-08
HNRNPAB	1.35309	7.90545	2.79994e-11	4.39794e-09
ENPP1	-1.21843	7.36689	4.16916e-09	2.18665e-07
RPS26	1.11001	7.39413	1.44475e-08	6.04103e-07
MCMBP	1.10554	6.56651	1.25074e-10	1.4043e-08
TFDP1	1.0855	7.8294	4.38448e-12	1.00314e-09
PEG3	-1.39748	8.62644	6.06883e-09	2.96762e-07
GFPT1	-1.58248	8.36968	7.0805e-15	6.81414e-12
CALM1	1.24414	7.01504	5.22614e-12	1.15975e-09
PNP	1.07454	6.04851	1.02988e-09	7.18547e-08
HMGN2	1.09731	7.79705	4.35193e-10	3.68476e-08
TSEN15	-1.24364	6.10509	5.30825e-10	4.29692e-08
RPL39	1.25336	8.61759	7.18491e-08	2.27478e-06
COL5A2	1.03992	6.50237	6.01941e-10	4.74586e-08
TMSB4X	-1.04275	6.98326	1.26794e-07	3.61181e-06
NUP62	1.07502	6.79599	8.33999e-10	6.06299e-08
DDX47	1.27972	6.17573	6.14573e-11	8.06527e-09
ITGA1	-1.42008	6.14059	2.36264e-09	1.38537e-07
PHB2	1.85719	7.44434	2.89305e-13	1.15398e-10
RPSAP58	1.24458	7.41522	3.37349e-07	8.25403e-06
DHFR	1.07525	6.59301	1.86644e-08	7.41075e-07
RPL41	1.71882	9.20351	6.34065e-07	1.40715e-05
RPS28	1.17379	6.70345	2.02922e-05	0.000269393
RPL23AP42	1.10499	6.9231	2.57549e-06	4.62399e-05
MTCO1P12	-1.0757	9.36331	4.4226e-05	0.000530239
RBM14	1.15444	6.00023	8.15804e-10	5.98092e-08
NME1	1.51599	6.81234	3.88961e-07	9.32497e-06
MIF	1.38279	8.03758	1.59131e-08	6.52339e-07
ARPC4	1.05814	6.07175	8.26136e-08	2.54257e-06
PEG10	1.37172	9.13266	1.70107e-14	1.30552e-11
EIF6	1.10064	6.91887	2.77897e-08	1.02612e-06
RBM12	1.18497	6.52688	4.00584e-11	5.76495e-09
GATC	1.05829	7.02051	4.08911e-07	9.70343e-06
RP11-386G11.10	1.01415	6.62725	9.00206e-09	4.06098e-07
CCPG1	-1.11721	6.64041	1.09693e-09	7.54046e-08
RPS7P1	1.11666	6.12597	2.30571e-07	6.00237e-06
TXNIP	-1.27334	7.43153	6.40237e-12	1.37886e-09
RP11-255H23.4	1.18196	6.23807	1.49063e-06	2.89948e-05
SLC6A14	2.47782	6.72196	1.29968e-16	3.42606e-13
RP5-940J5.9	1.00532	6.82066	2.87606e-08	1.05746e-06
DGKK	-1.94468	6.06688	1.14345e-12	3.3984e-10
CH507-513H4.4	1.43231	6.17414	2.03958e-07	5.41893e-06
CH507-513H4.6	1.36148	6.11595	4.56899e-07	1.06259e-05
CH507-513H4.3	1.49909	6.24102	1.80558e-07	4.89591e-06
AC006115.7	-1.40726	8.18408	1.01018e-08	4.48041e-07
RP11-274N19.4	-2.18949	6.14347	1.15874e-14	9.6239e-12

[truncated: 2 more sheets: JHH7-RR vs. JHH7-WT, Huh7 DEPs in proteomics]
