# Supplementary material
Source: Research Square preprint supplement (doi:10.21203/rs.3.rs-8651907/v1)
Supplement: Supplementary file 2 [file 2c84c29c05030da17ab48439.xlsx]

## Sheet: Legend
Sheet	Legend
ABE gRNA library information	sgRNA information for cancer-associated SNVs in ABE gRNA library.
CBE gRNA library information	sgRNA information for cancer-associated SNVs in CBE gRNA library.
Z-score in ABE screens	Z-scores for each SNVs in ABE screens.
Z-score in CBE screens	Z-scores for each SNVs in CBE screens.
Driver SNVs	Driver SNVs in base editing screens.
TKI resistance SNVs	TKI resistance SNVs in base editing screens.
TKI sensitizer SNVs	TKI sensitizer SNVs in base editing screens.

## Sheet: ABE gRNA library information
SNVs	sgRNA_ID	sgRNA_sequence	Histology
SLC35A3_c.970A>G_p.T324A	SLC35A3_c.970A>G_p.T324A_2	CAACATTGATCTCCTATTT	Hepatocellular carcinoma
SLC35A3_c.970A>G_p.T324A	SLC35A3_c.970A>G_p.T324A_3	TCAACATTGATCTCCTATT	Hepatocellular carcinoma
SLC35A3_c.970A>G_p.T324A	SLC35A3_c.970A>G_p.T324A_4	ATCAACATTGATCTCCTAT	Hepatocellular carcinoma
SLC35A3_c.970A>G_p.T324A	SLC35A3_c.970A>G_p.T324A_5	TATCAACATTGATCTCCTA	Hepatocellular carcinoma
SLC35A3_c.970A>G_p.T324A	SLC35A3_c.970A>G_p.T324A_6	TTATCAACATTGATCTCCT	Hepatocellular carcinoma
COL11A1_c.5369A>G_p.D1790G	COL11A1_c.5369A>G_p.D1790G_2	TGATCAGAATCAGAAGTTC	BRCA_HER-positive carcinoma
COL11A1_c.5369A>G_p.D1790G	COL11A1_c.5369A>G_p.D1790G_6	TTGGTGATCAGAATCAGAA	BRCA_HER-positive carcinoma
COL11A1_c.5369A>G_p.D1790G	COL11A1_c.5369A>G_p.D1790G_3	GTGATCAGAATCAGAAGTT	BRCA_HER-positive carcinoma
COL11A1_c.5369A>G_p.D1790G	COL11A1_c.5369A>G_p.D1790G_4	GGTGATCAGAATCAGAAGT	BRCA_HER-positive carcinoma
COL11A1_c.5369A>G_p.D1790G	COL11A1_c.5369A>G_p.D1790G_5	TGGTGATCAGAATCAGAAG	BRCA_HER-positive carcinoma
HENMT1_c.187A>G_p.R63G	HENMT1_c.187A>G_p.R63G_3	TTAAGGCTGCTAAAAGTCA	BRCA_HER-positive carcinoma
HENMT1_c.187A>G_p.R63G	HENMT1_c.187A>G_p.R63G_2	TAAGGCTGCTAAAAGTCAA	BRCA_HER-positive carcinoma
HENMT1_c.187A>G_p.R63G	HENMT1_c.187A>G_p.R63G_4	CTTAAGGCTGCTAAAAGTC	BRCA_HER-positive carcinoma
HENMT1_c.187A>G_p.R63G	HENMT1_c.187A>G_p.R63G_5	TCTTAAGGCTGCTAAAAGT	BRCA_HER-positive carcinoma
HENMT1_c.187A>G_p.R63G	HENMT1_c.187A>G_p.R63G_6	CTCTTAAGGCTGCTAAAAG	BRCA_HER-positive carcinoma
STRIP1_c.1387A>G_p.I463V	STRIP1_c.1387A>G_p.I463V_2	CAATCCACGAAAGCATCAA	BRCA_HER-positive carcinoma
STRIP1_c.1387A>G_p.I463V	STRIP1_c.1387A>G_p.I463V_3	CCAATCCACGAAAGCATCA	BRCA_HER-positive carcinoma
STRIP1_c.1387A>G_p.I463V	STRIP1_c.1387A>G_p.I463V_4	GCCAATCCACGAAAGCATC	BRCA_HER-positive carcinoma
STRIP1_c.1387A>G_p.I463V	STRIP1_c.1387A>G_p.I463V_5	GGCCAATCCACGAAAGCAT	BRCA_HER-positive carcinoma
STRIP1_c.1387A>G_p.I463V	STRIP1_c.1387A>G_p.I463V_6	AGGCCAATCCACGAAAGCA	BRCA_HER-positive carcinoma
CEPT1_c.1228A>G_p.T410A	CEPT1_c.1228A>G_p.T410A_6	GTCTCTACAGCTCATTCTA	BRCA_HER-positive carcinoma
CEPT1_c.1228A>G_p.T410A	CEPT1_c.1228A>G_p.T410A_2	CTACAGCTCATTCTAATCA	BRCA_HER-positive carcinoma
CEPT1_c.1228A>G_p.T410A	CEPT1_c.1228A>G_p.T410A_3	TCTACAGCTCATTCTAATC	BRCA_HER-positive carcinoma
CEPT1_c.1228A>G_p.T410A	CEPT1_c.1228A>G_p.T410A_4	CTCTACAGCTCATTCTAAT	BRCA_HER-positive carcinoma
CEPT1_c.1228A>G_p.T410A	CEPT1_c.1228A>G_p.T410A_5	TCTCTACAGCTCATTCTAA	BRCA_HER-positive carcinoma
MOV10_c.68T>C_p.V23A	MOV10_c.68T>C_p.V23A_2	GAACGACCAGGAAACTCTC	BRCA_HER-positive carcinoma
MOV10_c.68T>C_p.V23A	MOV10_c.68T>C_p.V23A_3	CGAACGACCAGGAAACTCT	BRCA_HER-positive carcinoma
MOV10_c.68T>C_p.V23A	MOV10_c.68T>C_p.V23A_4	CCGAACGACCAGGAAACTC	BRCA_HER-positive carcinoma
MOV10_c.68T>C_p.V23A	MOV10_c.68T>C_p.V23A_5	CCCGAACGACCAGGAAACT	BRCA_HER-positive carcinoma
MOV10_c.68T>C_p.V23A	MOV10_c.68T>C_p.V23A_6	CCCCGAACGACCAGGAAAC	BRCA_HER-positive carcinoma
NRAS_c.182A>G_p.Q61R	NRAS_c.182A>G_p.Q61R_2	ACAAGAAGAGTACAGTGCC	CRC_Adenocarcinoma, Non small cell carcinoma, BRCA_Basal (triple-negative) carcinoma
NRAS_c.182A>G_p.Q61R	NRAS_c.182A>G_p.Q61R_3	GACAAGAAGAGTACAGTGC	CRC_Adenocarcinoma, Non small cell carcinoma, BRCA_Basal (triple-negative) carcinoma
NRAS_c.182A>G_p.Q61R	NRAS_c.182A>G_p.Q61R_4	GGACAAGAAGAGTACAGTG	CRC_Adenocarcinoma, Non small cell carcinoma, BRCA_Basal (triple-negative) carcinoma
NRAS_c.182A>G_p.Q61R	NRAS_c.182A>G_p.Q61R_5	TGGACAAGAAGAGTACAGT	CRC_Adenocarcinoma, Non small cell carcinoma, BRCA_Basal (triple-negative) carcinoma
NRAS_c.182A>G_p.Q61R	NRAS_c.182A>G_p.Q61R_6	CTGGACAAGAAGAGTACAG	CRC_Adenocarcinoma, Non small cell carcinoma, BRCA_Basal (triple-negative) carcinoma
CSDE1_c.347A>G_p.E116G	CSDE1_c.347A>G_p.E116G_4	GTTGAATTTGAAGTATCAT	BRCA_HER-positive carcinoma
CSDE1_c.347A>G_p.E116G	CSDE1_c.347A>G_p.E116G_2	TGAATTTGAAGTATCATCG	BRCA_HER-positive carcinoma
CSDE1_c.347A>G_p.E116G	CSDE1_c.347A>G_p.E116G_3	TTGAATTTGAAGTATCATC	BRCA_HER-positive carcinoma
CSDE1_c.347A>G_p.E116G	CSDE1_c.347A>G_p.E116G_5	TGTTGAATTTGAAGTATCA	BRCA_HER-positive carcinoma
CSDE1_c.347A>G_p.E116G	CSDE1_c.347A>G_p.E116G_6	ATGTTGAATTTGAAGTATC	BRCA_HER-positive carcinoma
PLOD1_c.1795A>G_p.I599V	PLOD1_c.1795A>G_p.I599V_2	CTATTGACATCCACATGAA	BRCA_HER-positive carcinoma
PLOD1_c.1795A>G_p.I599V	PLOD1_c.1795A>G_p.I599V_3	ACTATTGACATCCACATGA	BRCA_HER-positive carcinoma
PLOD1_c.1795A>G_p.I599V	PLOD1_c.1795A>G_p.I599V_4	GACTATTGACATCCACATG	BRCA_HER-positive carcinoma
PLOD1_c.1795A>G_p.I599V	PLOD1_c.1795A>G_p.I599V_5	CGACTATTGACATCCACAT	BRCA_HER-positive carcinoma
PLOD1_c.1795A>G_p.I599V	PLOD1_c.1795A>G_p.I599V_6	CCGACTATTGACATCCACA	BRCA_HER-positive carcinoma
HMGCS2_c.538A>G_p.M180V	HMGCS2_c.538A>G_p.M180V_2	GGATGGAGTCCAGTTCCTG	Hepatocellular carcinoma
HMGCS2_c.538A>G_p.M180V	HMGCS2_c.538A>G_p.M180V_6	AACTGGATGGAGTCCAGTT	Hepatocellular carcinoma
HMGCS2_c.538A>G_p.M180V	HMGCS2_c.538A>G_p.M180V_3	TGGATGGAGTCCAGTTCCT	Hepatocellular carcinoma
HMGCS2_c.538A>G_p.M180V	HMGCS2_c.538A>G_p.M180V_4	CTGGATGGAGTCCAGTTCC	Hepatocellular carcinoma
HMGCS2_c.538A>G_p.M180V	HMGCS2_c.538A>G_p.M180V_5	ACTGGATGGAGTCCAGTTC	Hepatocellular carcinoma
SCNN1D_c.1465A>G_p.I489V	SCNN1D_c.1465A>G_p.I489V_4	CGGCATCAGGGTCATGGTT	Hepatocellular carcinoma
SCNN1D_c.1465A>G_p.I489V	SCNN1D_c.1465A>G_p.I489V_3	GGCATCAGGGTCATGGTTC	Hepatocellular carcinoma
SCNN1D_c.1465A>G_p.I489V	SCNN1D_c.1465A>G_p.I489V_5	CCGGCATCAGGGTCATGGT	Hepatocellular carcinoma
SCNN1D_c.1465A>G_p.I489V	SCNN1D_c.1465A>G_p.I489V_6	GCCGGCATCAGGGTCATGG	Hepatocellular carcinoma
SCNN1D_c.1465A>G_p.I489V	SCNN1D_c.1465A>G_p.I489V_2	GCATCAGGGTCATGGTTCA	Hepatocellular carcinoma
ARNT_c.106A>G_p.I36V	ARNT_c.106A>G_p.I36V_2	CCATTGTCCAGAGGGCTAT	Hepatocellular carcinoma
ARNT_c.106A>G_p.I36V	ARNT_c.106A>G_p.I36V_3	GCCATTGTCCAGAGGGCTA	Hepatocellular carcinoma
ARNT_c.106A>G_p.I36V	ARNT_c.106A>G_p.I36V_5	GAGCCATTGTCCAGAGGGC	Hepatocellular carcinoma
ARNT_c.106A>G_p.I36V	ARNT_c.106A>G_p.I36V_6	GGAGCCATTGTCCAGAGGG	Hepatocellular carcinoma
ARNT_c.106A>G_p.I36V	ARNT_c.106A>G_p.I36V_4	AGCCATTGTCCAGAGGGCT	Hepatocellular carcinoma
NUP210L_c.2837A>G_p.E946G	NUP210L_c.2837A>G_p.E946G_2	AGAAAGCTCTGTTGAGGTG	BRCA_HER-positive carcinoma
NUP210L_c.2837A>G_p.E946G	NUP210L_c.2837A>G_p.E946G_3	CAGAAAGCTCTGTTGAGGT	BRCA_HER-positive carcinoma
NUP210L_c.2837A>G_p.E946G	NUP210L_c.2837A>G_p.E946G_4	GCAGAAAGCTCTGTTGAGG	BRCA_HER-positive carcinoma
NUP210L_c.2837A>G_p.E946G	NUP210L_c.2837A>G_p.E946G_5	AGCAGAAAGCTCTGTTGAG	BRCA_HER-positive carcinoma
NUP210L_c.2837A>G_p.E946G	NUP210L_c.2837A>G_p.E946G_6	AAGCAGAAAGCTCTGTTGA	BRCA_HER-positive carcinoma
C1orf189_c.83A>G_p.N28S	C1orf189_c.83A>G_p.N28S_3	GAAATTCACATACTCACTG	BRCA_HER-positive carcinoma
C1orf189_c.83A>G_p.N28S	C1orf189_c.83A>G_p.N28S_4	CGAAATTCACATACTCACT	BRCA_HER-positive carcinoma
C1orf189_c.83A>G_p.N28S	C1orf189_c.83A>G_p.N28S_5	GCGAAATTCACATACTCAC	BRCA_HER-positive carcinoma
C1orf189_c.83A>G_p.N28S	C1orf189_c.83A>G_p.N28S_6	GGCGAAATTCACATACTCA	BRCA_HER-positive carcinoma
C1orf189_c.83A>G_p.N28S	C1orf189_c.83A>G_p.N28S_2	AAATTCACATACTCACTGT	BRCA_HER-positive carcinoma
AQP10_c.161A>G_p.N54S	AQP10_c.161A>G_p.N54S_3	GCAACTTCTTCACCATGTT	Non small cell carcinoma
AQP10_c.161A>G_p.N54S	AQP10_c.161A>G_p.N54S_4	GGCAACTTCTTCACCATGT	Non small cell carcinoma
AQP10_c.161A>G_p.N54S	AQP10_c.161A>G_p.N54S_5	AGGCAACTTCTTCACCATG	Non small cell carcinoma
AQP10_c.161A>G_p.N54S	AQP10_c.161A>G_p.N54S_2	CAACTTCTTCACCATGTTT	Non small cell carcinoma
AQP10_c.161A>G_p.N54S	AQP10_c.161A>G_p.N54S_6	AAGGCAACTTCTTCACCAT	Non small cell carcinoma
ARHGEF11_c.1637A>G_p.D546G	ARHGEF11_c.1637A>G_p.D546G_2	GGACAAGTGGCTACCGTTC	Hepatocellular carcinoma
ARHGEF11_c.1637A>G_p.D546G	ARHGEF11_c.1637A>G_p.D546G_3	AGGACAAGTGGCTACCGTT	Hepatocellular carcinoma
ARHGEF11_c.1637A>G_p.D546G	ARHGEF11_c.1637A>G_p.D546G_4	AAGGACAAGTGGCTACCGT	Hepatocellular carcinoma
ARHGEF11_c.1637A>G_p.D546G	ARHGEF11_c.1637A>G_p.D546G_6	ACAAGGACAAGTGGCTACC	Hepatocellular carcinoma
ARHGEF11_c.1637A>G_p.D546G	ARHGEF11_c.1637A>G_p.D546G_5	CAAGGACAAGTGGCTACCG	Hepatocellular carcinoma
FCRLA_c.391A>G_p.T131A	FCRLA_c.391A>G_p.T131A_2	TGACTCAGGTGACCTTCTA	Non small cell carcinoma
FCRLA_c.391A>G_p.T131A	FCRLA_c.391A>G_p.T131A_3	CTGACTCAGGTGACCTTCT	Non small cell carcinoma
FCRLA_c.391A>G_p.T131A	FCRLA_c.391A>G_p.T131A_4	ACTGACTCAGGTGACCTTC	Non small cell carcinoma
FCRLA_c.391A>G_p.T131A	FCRLA_c.391A>G_p.T131A_6	CCACTGACTCAGGTGACCT	Non small cell carcinoma
FCRLA_c.391A>G_p.T131A	FCRLA_c.391A>G_p.T131A_5	CACTGACTCAGGTGACCTT	Non small cell carcinoma
NECAP2_c.10A>G_p.S4G	NECAP2_c.10A>G_p.S4G_2	AGAGCGGGTACGAGTCGGT	BRCA_HER-positive carcinoma
NECAP2_c.10A>G_p.S4G	NECAP2_c.10A>G_p.S4G_3	GAGAGCGGGTACGAGTCGG	BRCA_HER-positive carcinoma
NECAP2_c.10A>G_p.S4G	NECAP2_c.10A>G_p.S4G_6	GAGGAGAGCGGGTACGAGT	BRCA_HER-positive carcinoma
NECAP2_c.10A>G_p.S4G	NECAP2_c.10A>G_p.S4G_4	GGAGAGCGGGTACGAGTCG	BRCA_HER-positive carcinoma
NECAP2_c.10A>G_p.S4G	NECAP2_c.10A>G_p.S4G_5	AGGAGAGCGGGTACGAGTC	BRCA_HER-positive carcinoma
KIAA0040_c.217A>G_p.K73E	KIAA0040_c.217A>G_p.K73E_4	GAAGAAGAAGAAGGATGAA	Non small cell carcinoma
KIAA0040_c.217A>G_p.K73E	KIAA0040_c.217A>G_p.K73E_3	AAGAAGAAGAAGGATGAAG	Non small cell carcinoma
KIAA0040_c.217A>G_p.K73E	KIAA0040_c.217A>G_p.K73E_2	AGAAGAAGAAGGATGAAGA	Non small cell carcinoma
KIAA0040_c.217A>G_p.K73E	KIAA0040_c.217A>G_p.K73E_5	AGAAGAAGAAGAAGGATGA	Non small cell carcinoma
KIAA0040_c.217A>G_p.K73E	KIAA0040_c.217A>G_p.K73E_6	AAGAAGAAGAAGAAGGATG	Non small cell carcinoma
RGS8_c.416T>C_p.V139A	RGS8_c.416T>C_p.V139A_2	TTACCTAGAGATACAAACA	BRCA_HER-positive carcinoma
RGS8_c.416T>C_p.V139A	RGS8_c.416T>C_p.V139A_3	TTTACCTAGAGATACAAAC	BRCA_HER-positive carcinoma
RGS8_c.416T>C_p.V139A	RGS8_c.416T>C_p.V139A_4	GTTTACCTAGAGATACAAA	BRCA_HER-positive carcinoma
RGS8_c.416T>C_p.V139A	RGS8_c.416T>C_p.V139A_5	TGTTTACCTAGAGATACAA	BRCA_HER-positive carcinoma
RGS8_c.416T>C_p.V139A	RGS8_c.416T>C_p.V139A_6	ATGTTTACCTAGAGATACA	BRCA_HER-positive carcinoma
CAMSAP2_c.227T>C_p.L76P	CAMSAP2_c.227T>C_p.L76P_2	ATAGAAGCAAATTAACAAC	Hepatocellular carcinoma
CAMSAP2_c.227T>C_p.L76P	CAMSAP2_c.227T>C_p.L76P_6	GCCGATAGAAGCAAATTAA	Hepatocellular carcinoma
CAMSAP2_c.227T>C_p.L76P	CAMSAP2_c.227T>C_p.L76P_3	GATAGAAGCAAATTAACAA	Hepatocellular carcinoma
CAMSAP2_c.227T>C_p.L76P	CAMSAP2_c.227T>C_p.L76P_4	CGATAGAAGCAAATTAACA	Hepatocellular carcinoma
CAMSAP2_c.227T>C_p.L76P	CAMSAP2_c.227T>C_p.L76P_5	CCGATAGAAGCAAATTAAC	Hepatocellular carcinoma
MYBPH_c.752A>G_p.E251G	MYBPH_c.752A>G_p.E251G_2	GGAAGACCTGGAGGCCAAG	Hepatocellular carcinoma
MYBPH_c.752A>G_p.E251G	MYBPH_c.752A>G_p.E251G_3	TGGAAGACCTGGAGGCCAA	Hepatocellular carcinoma
MYBPH_c.752A>G_p.E251G	MYBPH_c.752A>G_p.E251G_4	GTGGAAGACCTGGAGGCCA	Hepatocellular carcinoma
MYBPH_c.752A>G_p.E251G	MYBPH_c.752A>G_p.E251G_5	CGTGGAAGACCTGGAGGCC	Hepatocellular carcinoma
MYBPH_c.752A>G_p.E251G	MYBPH_c.752A>G_p.E251G_6	GCGTGGAAGACCTGGAGGC	Hepatocellular carcinoma
CR1L_c.128T>C_p.F43S	CR1L_c.128T>C_p.F43S_2	CAAATGGAAGCCATTCCGG	Non small cell carcinoma
CR1L_c.128T>C_p.F43S	CR1L_c.128T>C_p.F43S_3	GCAAATGGAAGCCATTCCG	Non small cell carcinoma
CR1L_c.128T>C_p.F43S	CR1L_c.128T>C_p.F43S_4	GGCAAATGGAAGCCATTCC	Non small cell carcinoma
CR1L_c.128T>C_p.F43S	CR1L_c.128T>C_p.F43S_5	TGGCAAATGGAAGCCATTC	Non small cell carcinoma
CR1L_c.128T>C_p.F43S	CR1L_c.128T>C_p.F43S_6	CTGGCAAATGGAAGCCATT	Non small cell carcinoma
PROX1_c.1886A>G_p.E629G	PROX1_c.1886A>G_p.E629G_5	CCGTGAGTTTTACTACATT	Hepatocellular carcinoma
PROX1_c.1886A>G_p.E629G	PROX1_c.1886A>G_p.E629G_2	TGAGTTTTACTACATTCAG	Hepatocellular carcinoma
PROX1_c.1886A>G_p.E629G	PROX1_c.1886A>G_p.E629G_3	GTGAGTTTTACTACATTCA	Hepatocellular carcinoma
PROX1_c.1886A>G_p.E629G	PROX1_c.1886A>G_p.E629G_4	CGTGAGTTTTACTACATTC	Hepatocellular carcinoma
PROX1_c.1886A>G_p.E629G	PROX1_c.1886A>G_p.E629G_6	TCCGTGAGTTTTACTACAT	Hepatocellular carcinoma
NBPF3_c.1873T>C_p.F625L	NBPF3_c.1873T>C_p.F625L_2	GAAGGCCAGGTGGTGCCTT	BRCA_HER-positive carcinoma
NBPF3_c.1873T>C_p.F625L	NBPF3_c.1873T>C_p.F625L_3	GGAAGGCCAGGTGGTGCCT	BRCA_HER-positive carcinoma
NBPF3_c.1873T>C_p.F625L	NBPF3_c.1873T>C_p.F625L_4	TGGAAGGCCAGGTGGTGCC	BRCA_HER-positive carcinoma
NBPF3_c.1873T>C_p.F625L	NBPF3_c.1873T>C_p.F625L_5	CTGGAAGGCCAGGTGGTGC	BRCA_HER-positive carcinoma
NBPF3_c.1873T>C_p.F625L	NBPF3_c.1873T>C_p.F625L_6	TCTGGAAGGCCAGGTGGTG	BRCA_HER-positive carcinoma
HSPG2_c.11236A>G_p.I3746V	HSPG2_c.11236A>G_p.I3746V_2	CCATCCGCCATCCCACACC	Hepatocellular carcinoma
HSPG2_c.11236A>G_p.I3746V	HSPG2_c.11236A>G_p.I3746V_3	ACCATCCGCCATCCCACAC	Hepatocellular carcinoma
HSPG2_c.11236A>G_p.I3746V	HSPG2_c.11236A>G_p.I3746V_6	GCCACCATCCGCCATCCCA	Hepatocellular carcinoma
HSPG2_c.11236A>G_p.I3746V	HSPG2_c.11236A>G_p.I3746V_4	CACCATCCGCCATCCCACA	Hepatocellular carcinoma
HSPG2_c.11236A>G_p.I3746V	HSPG2_c.11236A>G_p.I3746V_5	CCACCATCCGCCATCCCAC	Hepatocellular carcinoma
CELA3A_c.460A>G_p.K154E	CELA3A_c.460A>G_p.K154E_4	CAACAAGACACCCTGCTAC	BRCA_HER-positive carcinoma
CELA3A_c.460A>G_p.K154E	CELA3A_c.460A>G_p.K154E_3	AACAAGACACCCTGCTACA	BRCA_HER-positive carcinoma
CELA3A_c.460A>G_p.K154E	CELA3A_c.460A>G_p.K154E_2	ACAAGACACCCTGCTACAT	BRCA_HER-positive carcinoma
CELA3A_c.460A>G_p.K154E	CELA3A_c.460A>G_p.K154E_5	CCAACAAGACACCCTGCTA	BRCA_HER-positive carcinoma
CELA3A_c.460A>G_p.K154E	CELA3A_c.460A>G_p.K154E_6	CCCAACAAGACACCCTGCT	BRCA_HER-positive carcinoma
DISP1_c.4367A>G_p.N1456S	DISP1_c.4367A>G_p.N1456S_2	CAATCAGAATGAACCAAAA	Hepatocellular carcinoma
DISP1_c.4367A>G_p.N1456S	DISP1_c.4367A>G_p.N1456S_3	TCAATCAGAATGAACCAAA	Hepatocellular carcinoma
DISP1_c.4367A>G_p.N1456S	DISP1_c.4367A>G_p.N1456S_4	TTCAATCAGAATGAACCAA	Hepatocellular carcinoma
DISP1_c.4367A>G_p.N1456S	DISP1_c.4367A>G_p.N1456S_5	TTTCAATCAGAATGAACCA	Hepatocellular carcinoma
DISP1_c.4367A>G_p.N1456S	DISP1_c.4367A>G_p.N1456S_6	ATTTCAATCAGAATGAACC	Hepatocellular carcinoma
C1QA_c.359T>C_p.I120T	C1QA_c.359T>C_p.I120T_2	GAATGGCGGAGAAGGCTGG	Hepatocellular carcinoma
C1QA_c.359T>C_p.I120T	C1QA_c.359T>C_p.I120T_6	CGCCGAATGGCGGAGAAGG	Hepatocellular carcinoma
C1QA_c.359T>C_p.I120T	C1QA_c.359T>C_p.I120T_3	CGAATGGCGGAGAAGGCTG	Hepatocellular carcinoma
C1QA_c.359T>C_p.I120T	C1QA_c.359T>C_p.I120T_4	CCGAATGGCGGAGAAGGCT	Hepatocellular carcinoma
C1QA_c.359T>C_p.I120T	C1QA_c.359T>C_p.I120T_5	GCCGAATGGCGGAGAAGGC	Hepatocellular carcinoma
TRIM11_c.67T>C_p.F23L	TRIM11_c.67T>C_p.F23L_2	GAAGTAGTCGAGGCAGATG	Hepatocellular carcinoma
TRIM11_c.67T>C_p.F23L	TRIM11_c.67T>C_p.F23L_3	TGAAGTAGTCGAGGCAGAT	Hepatocellular carcinoma
TRIM11_c.67T>C_p.F23L	TRIM11_c.67T>C_p.F23L_4	GTGAAGTAGTCGAGGCAGA	Hepatocellular carcinoma
TRIM11_c.67T>C_p.F23L	TRIM11_c.67T>C_p.F23L_5	CGTGAAGTAGTCGAGGCAG	Hepatocellular carcinoma
TRIM11_c.67T>C_p.F23L	TRIM11_c.67T>C_p.F23L_6	CCGTGAAGTAGTCGAGGCA	Hepatocellular carcinoma
GNG4_c.20A>G_p.N7S	GNG4_c.20A>G_p.N7S_2	TAATAACAGCACCACTAGC	Hepatocellular carcinoma
GNG4_c.20A>G_p.N7S	GNG4_c.20A>G_p.N7S_3	CTAATAACAGCACCACTAG	Hepatocellular carcinoma
GNG4_c.20A>G_p.N7S	GNG4_c.20A>G_p.N7S_4	TCTAATAACAGCACCACTA	Hepatocellular carcinoma
GNG4_c.20A>G_p.N7S	GNG4_c.20A>G_p.N7S_5	GTCTAATAACAGCACCACT	Hepatocellular carcinoma
GNG4_c.20A>G_p.N7S	GNG4_c.20A>G_p.N7S_6	TGTCTAATAACAGCACCAC	Hepatocellular carcinoma
LYST_c.10034T>C_p.L3345P	LYST_c.10034T>C_p.L3345P_5	ACTCTAGAGCCTGCCGATG	BRCA_HER-positive carcinoma
LYST_c.10034T>C_p.L3345P	LYST_c.10034T>C_p.L3345P_2	CTAGAGCCTGCCGATGGAT	BRCA_HER-positive carcinoma
LYST_c.10034T>C_p.L3345P	LYST_c.10034T>C_p.L3345P_3	TCTAGAGCCTGCCGATGGA	BRCA_HER-positive carcinoma
LYST_c.10034T>C_p.L3345P	LYST_c.10034T>C_p.L3345P_4	CTCTAGAGCCTGCCGATGG	BRCA_HER-positive carcinoma
LYST_c.10034T>C_p.L3345P	LYST_c.10034T>C_p.L3345P_6	GACTCTAGAGCCTGCCGAT	BRCA_HER-positive carcinoma
ACTN2_c.505A>G_p.R169G	ACTN2_c.505A>G_p.R169G_2	ATAGAAATGTGAACATTCA	Hepatocellular carcinoma
ACTN2_c.505A>G_p.R169G	ACTN2_c.505A>G_p.R169G_3	TATAGAAATGTGAACATTC	Hepatocellular carcinoma
ACTN2_c.505A>G_p.R169G	ACTN2_c.505A>G_p.R169G_4	TTATAGAAATGTGAACATT	Hepatocellular carcinoma
ACTN2_c.505A>G_p.R169G	ACTN2_c.505A>G_p.R169G_5	CTTATAGAAATGTGAACAT	Hepatocellular carcinoma
ACTN2_c.505A>G_p.R169G	ACTN2_c.505A>G_p.R169G_6	CCTTATAGAAATGTGAACA	Hepatocellular carcinoma
CNST_c.863A>G_p.Q288R	CNST_c.863A>G_p.Q288R_2	CCAGGAAAGGAAATGCTCC	Non small cell carcinoma
CNST_c.863A>G_p.Q288R	CNST_c.863A>G_p.Q288R_3	CCCAGGAAAGGAAATGCTC	Non small cell carcinoma
CNST_c.863A>G_p.Q288R	CNST_c.863A>G_p.Q288R_6	AGTCCCAGGAAAGGAAATG	Non small cell carcinoma
CNST_c.863A>G_p.Q288R	CNST_c.863A>G_p.Q288R_4	TCCCAGGAAAGGAAATGCT	Non small cell carcinoma
CNST_c.863A>G_p.Q288R	CNST_c.863A>G_p.Q288R_5	GTCCCAGGAAAGGAAATGC	Non small cell carcinoma
OR2T3_c.547T>C_p.F183L	OR2T3_c.547T>C_p.F183L_5	ACAGAAAAAACTCAGGATT	BRCA_HER-positive carcinoma
OR2T3_c.547T>C_p.F183L	OR2T3_c.547T>C_p.F183L_6	CACAGAAAAAACTCAGGAT	BRCA_HER-positive carcinoma
OR2T3_c.547T>C_p.F183L	OR2T3_c.547T>C_p.F183L_2	GAAAAAACTCAGGATTTTC	BRCA_HER-positive carcinoma
OR2T3_c.547T>C_p.F183L	OR2T3_c.547T>C_p.F183L_4	CAGAAAAAACTCAGGATTT	BRCA_HER-positive carcinoma
OR2T3_c.547T>C_p.F183L	OR2T3_c.547T>C_p.F183L_3	AGAAAAAACTCAGGATTTT	BRCA_HER-positive carcinoma
OR2T27_c.491T>C_p.M164T	OR2T27_c.491T>C_p.M164T_4	CTGCATGGTGACGGGGGTG	BRCA_HER-positive carcinoma
OR2T27_c.491T>C_p.M164T	OR2T27_c.491T>C_p.M164T_5	ACTGCATGGTGACGGGGGT	BRCA_HER-positive carcinoma
OR2T27_c.491T>C_p.M164T	OR2T27_c.491T>C_p.M164T_6	AACTGCATGGTGACGGGGG	BRCA_HER-positive carcinoma
OR2T27_c.491T>C_p.M164T	OR2T27_c.491T>C_p.M164T_3	TGCATGGTGACGGGGGTGA	BRCA_HER-positive carcinoma
OR2T27_c.491T>C_p.M164T	OR2T27_c.491T>C_p.M164T_2	GCATGGTGACGGGGGTGAG	BRCA_HER-positive carcinoma
TRIM63_c.766T>C_p.S256P	TRIM63_c.766T>C_p.S256P_5	TGTGGACTTGTCCAGCTGC	Hepatocellular carcinoma
TRIM63_c.766T>C_p.S256P	TRIM63_c.766T>C_p.S256P_2	GGACTTGTCCAGCTGCTCC	Hepatocellular carcinoma
TRIM63_c.766T>C_p.S256P	TRIM63_c.766T>C_p.S256P_3	TGGACTTGTCCAGCTGCTC	Hepatocellular carcinoma
TRIM63_c.766T>C_p.S256P	TRIM63_c.766T>C_p.S256P_4	GTGGACTTGTCCAGCTGCT	Hepatocellular carcinoma
TRIM63_c.766T>C_p.S256P	TRIM63_c.766T>C_p.S256P_6	TTGTGGACTTGTCCAGCTG	Hepatocellular carcinoma
ARID1A_c.583T>C_p.Y195H	ARID1A_c.583T>C_p.Y195H_3	CGTAGGGCTCCAGGCCCCC	BRCA_HER-positive carcinoma
ARID1A_c.583T>C_p.Y195H	ARID1A_c.583T>C_p.Y195H_4	GCGTAGGGCTCCAGGCCCC	BRCA_HER-positive carcinoma
ARID1A_c.583T>C_p.Y195H	ARID1A_c.583T>C_p.Y195H_2	GTAGGGCTCCAGGCCCCCG	BRCA_HER-positive carcinoma
ARID1A_c.583T>C_p.Y195H	ARID1A_c.583T>C_p.Y195H_5	CGCGTAGGGCTCCAGGCCC	BRCA_HER-positive carcinoma
ARID1A_c.583T>C_p.Y195H	ARID1A_c.583T>C_p.Y195H_6	CCGCGTAGGGCTCCAGGCC	BRCA_HER-positive carcinoma
ARID1A_c.2759A>G_p.Q920R	ARID1A_c.2759A>G_p.Q920R_3	ATCAAGGGGGCATGATGGG	Non small cell carcinoma
ARID1A_c.2759A>G_p.Q920R	ARID1A_c.2759A>G_p.Q920R_4	AATCAAGGGGGCATGATGG	Non small cell carcinoma
ARID1A_c.2759A>G_p.Q920R	ARID1A_c.2759A>G_p.Q920R_2	TCAAGGGGGCATGATGGGA	Non small cell carcinoma
ARID1A_c.2759A>G_p.Q920R	ARID1A_c.2759A>G_p.Q920R_5	GAATCAAGGGGGCATGATG	Non small cell carcinoma
ARID1A_c.2759A>G_p.Q920R	ARID1A_c.2759A>G_p.Q920R_6	TGAATCAAGGGGGCATGAT	Non small cell carcinoma
NKAIN1_c.146T>C_p.L49P	NKAIN1_c.146T>C_p.L49P_3	CCCAGGATGACTGCCATGA	BRCA_HER-positive carcinoma
NKAIN1_c.146T>C_p.L49P	NKAIN1_c.146T>C_p.L49P_2	CCAGGATGACTGCCATGAT	BRCA_HER-positive carcinoma
NKAIN1_c.146T>C_p.L49P	NKAIN1_c.146T>C_p.L49P_6	ATGCCCAGGATGACTGCCA	BRCA_HER-positive carcinoma
NKAIN1_c.146T>C_p.L49P	NKAIN1_c.146T>C_p.L49P_4	GCCCAGGATGACTGCCATG	BRCA_HER-positive carcinoma
NKAIN1_c.146T>C_p.L49P	NKAIN1_c.146T>C_p.L49P_5	TGCCCAGGATGACTGCCAT	BRCA_HER-positive carcinoma
CSMD2_c.4988T>C_p.F1663S	CSMD2_c.4988T>C_p.F1663S_2	AGAAGGCGAACTGGCCAAA	BRCA_HER-positive carcinoma
CSMD2_c.4988T>C_p.F1663S	CSMD2_c.4988T>C_p.F1663S_6	TGAAAGAAGGCGAACTGGC	BRCA_HER-positive carcinoma
CSMD2_c.4988T>C_p.F1663S	CSMD2_c.4988T>C_p.F1663S_3	AAGAAGGCGAACTGGCCAA	BRCA_HER-positive carcinoma
CSMD2_c.4988T>C_p.F1663S	CSMD2_c.4988T>C_p.F1663S_4	AAAGAAGGCGAACTGGCCA	BRCA_HER-positive carcinoma
CSMD2_c.4988T>C_p.F1663S	CSMD2_c.4988T>C_p.F1663S_5	GAAAGAAGGCGAACTGGCC	BRCA_HER-positive carcinoma
MACF1_c.2006T>C_p.M669T	MACF1_c.2006T>C_p.M669T_2	ACATTTCCTTTTTGTCCAG	Non small cell carcinoma
MACF1_c.2006T>C_p.M669T	MACF1_c.2006T>C_p.M669T_6	TTTAACATTTCCTTTTTGT	Non small cell carcinoma
MACF1_c.2006T>C_p.M669T	MACF1_c.2006T>C_p.M669T_3	AACATTTCCTTTTTGTCCA	Non small cell carcinoma
MACF1_c.2006T>C_p.M669T	MACF1_c.2006T>C_p.M669T_4	TAACATTTCCTTTTTGTCC	Non small cell carcinoma
MACF1_c.2006T>C_p.M669T	MACF1_c.2006T>C_p.M669T_5	TTAACATTTCCTTTTTGTC	Non small cell carcinoma
OXCT2_c.1439A>G_p.E480G	OXCT2_c.1439A>G_p.E480G_6	AGAAAGAGCTGACGCTGAG	Non small cell carcinoma
OXCT2_c.1439A>G_p.E480G	OXCT2_c.1439A>G_p.E480G_2	AGAGCTGACGCTGAGGGAG	Non small cell carcinoma
OXCT2_c.1439A>G_p.E480G	OXCT2_c.1439A>G_p.E480G_3	AAGAGCTGACGCTGAGGGA	Non small cell carcinoma
OXCT2_c.1439A>G_p.E480G	OXCT2_c.1439A>G_p.E480G_4	AAAGAGCTGACGCTGAGGG	Non small cell carcinoma
OXCT2_c.1439A>G_p.E480G	OXCT2_c.1439A>G_p.E480G_5	GAAAGAGCTGACGCTGAGG	Non small cell carcinoma
ZMPSTE24_c.946A>G_p.K316E	ZMPSTE24_c.946A>G_p.K316E_3	GCTAAAGTTAAAGTGAGTT	BRCA_HER-positive carcinoma
ZMPSTE24_c.946A>G_p.K316E	ZMPSTE24_c.946A>G_p.K316E_4	AGCTAAAGTTAAAGTGAGT	BRCA_HER-positive carcinoma
ZMPSTE24_c.946A>G_p.K316E	ZMPSTE24_c.946A>G_p.K316E_5	AAGCTAAAGTTAAAGTGAG	BRCA_HER-positive carcinoma
ZMPSTE24_c.946A>G_p.K316E	ZMPSTE24_c.946A>G_p.K316E_6	AAAGCTAAAGTTAAAGTGA	BRCA_HER-positive carcinoma
ZMPSTE24_c.946A>G_p.K316E	ZMPSTE24_c.946A>G_p.K316E_2	CTAAAGTTAAAGTGAGTTA	BRCA_HER-positive carcinoma
ST3GAL3_c.622A>G_p.I208V	ST3GAL3_c.622A>G_p.I208V_3	GCCATCTTGTCAGTCACCA	Hepatocellular carcinoma
ST3GAL3_c.622A>G_p.I208V	ST3GAL3_c.622A>G_p.I208V_4	AGCCATCTTGTCAGTCACC	Hepatocellular carcinoma
ST3GAL3_c.622A>G_p.I208V	ST3GAL3_c.622A>G_p.I208V_5	AAGCCATCTTGTCAGTCAC	Hepatocellular carcinoma
ST3GAL3_c.622A>G_p.I208V	ST3GAL3_c.622A>G_p.I208V_2	CCATCTTGTCAGTCACCAA	Hepatocellular carcinoma
ST3GAL3_c.622A>G_p.I208V	ST3GAL3_c.622A>G_p.I208V_6	AAAGCCATCTTGTCAGTCA	Hepatocellular carcinoma
CCDC24_c.640A>G_p.K214E	CCDC24_c.640A>G_p.K214E_2	AGAAGGCCATGGAGCAGGA	Small cell carcinoma
CCDC24_c.640A>G_p.K214E	CCDC24_c.640A>G_p.K214E_3	AAGAAGGCCATGGAGCAGG	Small cell carcinoma
CCDC24_c.640A>G_p.K214E	CCDC24_c.640A>G_p.K214E_4	GAAGAAGGCCATGGAGCAG	Small cell carcinoma
CCDC24_c.640A>G_p.K214E	CCDC24_c.640A>G_p.K214E_6	CAGAAGAAGGCCATGGAGC	Small cell carcinoma
CCDC24_c.640A>G_p.K214E	CCDC24_c.640A>G_p.K214E_5	AGAAGAAGGCCATGGAGCA	Small cell carcinoma
HECTD3_c.1574A>G_p.D525G	HECTD3_c.1574A>G_p.D525G_2	TGACCAGTGGTGGGAGTGT	Hepatocellular carcinoma
HECTD3_c.1574A>G_p.D525G	HECTD3_c.1574A>G_p.D525G_3	ATGACCAGTGGTGGGAGTG	Hepatocellular carcinoma
HECTD3_c.1574A>G_p.D525G	HECTD3_c.1574A>G_p.D525G_4	TATGACCAGTGGTGGGAGT	Hepatocellular carcinoma
HECTD3_c.1574A>G_p.D525G	HECTD3_c.1574A>G_p.D525G_6	GCTATGACCAGTGGTGGGA	Hepatocellular carcinoma
HECTD3_c.1574A>G_p.D525G	HECTD3_c.1574A>G_p.D525G_5	CTATGACCAGTGGTGGGAG	Hepatocellular carcinoma
ORC1_c.2308T>C_p.S770P	ORC1_c.2308T>C_p.S770P_2	GGAATTTCTTAAAGGAAAC	BRCA_HER-positive carcinoma
ORC1_c.2308T>C_p.S770P	ORC1_c.2308T>C_p.S770P_3	AGGAATTTCTTAAAGGAAA	BRCA_HER-positive carcinoma
ORC1_c.2308T>C_p.S770P	ORC1_c.2308T>C_p.S770P_4	GAGGAATTTCTTAAAGGAA	BRCA_HER-positive carcinoma
ORC1_c.2308T>C_p.S770P	ORC1_c.2308T>C_p.S770P_5	AGAGGAATTTCTTAAAGGA	BRCA_HER-positive carcinoma
ORC1_c.2308T>C_p.S770P	ORC1_c.2308T>C_p.S770P_6	CAGAGGAATTTCTTAAAGG	BRCA_HER-positive carcinoma
ORC1_c.485A>G_p.E162G	ORC1_c.485A>G_p.E162G_2	TGAGAAGAAATTCAGGCCA	Hepatocellular carcinoma
ORC1_c.485A>G_p.E162G	ORC1_c.485A>G_p.E162G_4	AATGAGAAGAAATTCAGGC	Hepatocellular carcinoma
ORC1_c.485A>G_p.E162G	ORC1_c.485A>G_p.E162G_5	GAATGAGAAGAAATTCAGG	Hepatocellular carcinoma
ORC1_c.485A>G_p.E162G	ORC1_c.485A>G_p.E162G_6	GGAATGAGAAGAAATTCAG	Hepatocellular carcinoma
ORC1_c.485A>G_p.E162G	ORC1_c.485A>G_p.E162G_3	ATGAGAAGAAATTCAGGCC	Hepatocellular carcinoma
CPT2_c.1417A>G_p.M473V	CPT2_c.1417A>G_p.M473V_2	AGATGGCCTTCCTGCGGCA	Hepatocellular carcinoma
CPT2_c.1417A>G_p.M473V	CPT2_c.1417A>G_p.M473V_4	CCAGATGGCCTTCCTGCGG	Hepatocellular carcinoma
CPT2_c.1417A>G_p.M473V	CPT2_c.1417A>G_p.M473V_5	TCCAGATGGCCTTCCTGCG	Hepatocellular carcinoma
CPT2_c.1417A>G_p.M473V	CPT2_c.1417A>G_p.M473V_6	TTCCAGATGGCCTTCCTGC	Hepatocellular carcinoma
CPT2_c.1417A>G_p.M473V	CPT2_c.1417A>G_p.M473V_3	CAGATGGCCTTCCTGCGGC	Hepatocellular carcinoma
RAVER2_c.460A>G_p.T154A	RAVER2_c.460A>G_p.T154A_6	TCTTTTACATCAGAAGAGT	BRCA_HER-positive carcinoma
RAVER2_c.460A>G_p.T154A	RAVER2_c.460A>G_p.T154A_2	TTACATCAGAAGAGTTTGA	BRCA_HER-positive carcinoma
RAVER2_c.460A>G_p.T154A	RAVER2_c.460A>G_p.T154A_3	TTTACATCAGAAGAGTTTG	BRCA_HER-positive carcinoma
RAVER2_c.460A>G_p.T154A	RAVER2_c.460A>G_p.T154A_4	TTTTACATCAGAAGAGTTT	BRCA_HER-positive carcinoma
RAVER2_c.460A>G_p.T154A	RAVER2_c.460A>G_p.T154A_5	CTTTTACATCAGAAGAGTT	BRCA_HER-positive carcinoma
JAK1_c.2729T>C_p.L910P	JAK1_c.2729T>C_p.L910P_3	TTCAGAGATTTAACAGCCA	Hepatocellular carcinoma
JAK1_c.2729T>C_p.L910P	JAK1_c.2729T>C_p.L910P_4	CTTCAGAGATTTAACAGCC	Hepatocellular carcinoma
JAK1_c.2729T>C_p.L910P	JAK1_c.2729T>C_p.L910P_5	GCTTCAGAGATTTAACAGC	Hepatocellular carcinoma
JAK1_c.2729T>C_p.L910P	JAK1_c.2729T>C_p.L910P_6	GGCTTCAGAGATTTAACAG	Hepatocellular carcinoma
JAK1_c.2729T>C_p.L910P	JAK1_c.2729T>C_p.L910P_2	TCAGAGATTTAACAGCCAC	Hepatocellular carcinoma
JAK1_c.599A>G_p.Y200C	JAK1_c.599A>G_p.Y200C_3	ACTATGCCATGATGAAGAA	Small cell carcinoma
JAK1_c.599A>G_p.Y200C	JAK1_c.599A>G_p.Y200C_4	CACTATGCCATGATGAAGA	Small cell carcinoma
JAK1_c.599A>G_p.Y200C	JAK1_c.599A>G_p.Y200C_5	ACACTATGCCATGATGAAG	Small cell carcinoma
JAK1_c.599A>G_p.Y200C	JAK1_c.599A>G_p.Y200C_2	CTATGCCATGATGAAGAAG	Small cell carcinoma
JAK1_c.599A>G_p.Y200C	JAK1_c.599A>G_p.Y200C_6	CACACTATGCCATGATGAA	Small cell carcinoma
SGIP1_c.998A>G_p.D333G	SGIP1_c.998A>G_p.D333G_2	TGACAAACTGCCCTCGTTT	BRCA_HER-positive carcinoma
SGIP1_c.998A>G_p.D333G	SGIP1_c.998A>G_p.D333G_3	ATGACAAACTGCCCTCGTT	BRCA_HER-positive carcinoma
SGIP1_c.998A>G_p.D333G	SGIP1_c.998A>G_p.D333G_4	TATGACAAACTGCCCTCGT	BRCA_HER-positive carcinoma
SGIP1_c.998A>G_p.D333G	SGIP1_c.998A>G_p.D333G_6	TTTATGACAAACTGCCCTC	BRCA_HER-positive carcinoma
SGIP1_c.998A>G_p.D333G	SGIP1_c.998A>G_p.D333G_5	TTATGACAAACTGCCCTCG	BRCA_HER-positive carcinoma
C1orf141_c.671A>G_p.K224R	C1orf141_c.671A>G_p.K224R_2	AAAAAATAGATTTTCTTCT	Hepatocellular carcinoma
C1orf141_c.671A>G_p.K224R	C1orf141_c.671A>G_p.K224R_3	CAAAAAATAGATTTTCTTC	Hepatocellular carcinoma
C1orf141_c.671A>G_p.K224R	C1orf141_c.671A>G_p.K224R_4	ACAAAAAATAGATTTTCTT	Hepatocellular carcinoma
C1orf141_c.671A>G_p.K224R	C1orf141_c.671A>G_p.K224R_6	TGACAAAAAATAGATTTTC	Hepatocellular carcinoma
C1orf141_c.671A>G_p.K224R	C1orf141_c.671A>G_p.K224R_5	GACAAAAAATAGATTTTCT	Hepatocellular carcinoma
CCDC18_c.2924A>G_p.Q975R	CCDC18_c.2924A>G_p.Q975R_2	TCAATTATCATTAGAGGAA	Hepatocellular carcinoma
CCDC18_c.2924A>G_p.Q975R	CCDC18_c.2924A>G_p.Q975R_3	CTCAATTATCATTAGAGGA	Hepatocellular carcinoma
CCDC18_c.2924A>G_p.Q975R	CCDC18_c.2924A>G_p.Q975R_4	GCTCAATTATCATTAGAGG	Hepatocellular carcinoma
CCDC18_c.2924A>G_p.Q975R	CCDC18_c.2924A>G_p.Q975R_5	GGCTCAATTATCATTAGAG	Hepatocellular carcinoma
CCDC18_c.2924A>G_p.Q975R	CCDC18_c.2924A>G_p.Q975R_6	AGGCTCAATTATCATTAGA	Hepatocellular carcinoma
DNTTIP2_c.937A>G_p.I313V	DNTTIP2_c.937A>G_p.I313V_2	AAATTAATGAGAAAAGTTC	Hepatocellular carcinoma
DNTTIP2_c.937A>G_p.I313V	DNTTIP2_c.937A>G_p.I313V_4	AGAAATTAATGAGAAAAGT	Hepatocellular carcinoma
DNTTIP2_c.937A>G_p.I313V	DNTTIP2_c.937A>G_p.I313V_5	AAGAAATTAATGAGAAAAG	Hepatocellular carcinoma
DNTTIP2_c.937A>G_p.I313V	DNTTIP2_c.937A>G_p.I313V_6	AAAGAAATTAATGAGAAAA	Hepatocellular carcinoma
DNTTIP2_c.937A>G_p.I313V	DNTTIP2_c.937A>G_p.I313V_3	GAAATTAATGAGAAAAGTT	Hepatocellular carcinoma
DPYD_c.496A>G_p.M166V	DPYD_c.496A>G_p.M166V_2	CAATGAGTATCCCACAGAT	Non small cell carcinoma
DPYD_c.496A>G_p.M166V	DPYD_c.496A>G_p.M166V_4	AGCAATGAGTATCCCACAG	Non small cell carcinoma
DPYD_c.496A>G_p.M166V	DPYD_c.496A>G_p.M166V_5	AAGCAATGAGTATCCCACA	Non small cell carcinoma
DPYD_c.496A>G_p.M166V	DPYD_c.496A>G_p.M166V_6	AAAGCAATGAGTATCCCAC	Non small cell carcinoma
DPYD_c.496A>G_p.M166V	DPYD_c.496A>G_p.M166V_3	GCAATGAGTATCCCACAGA	Non small cell carcinoma
NDUFB8_c.355A>G_p.T119A	NDUFB8_c.355A>G_p.T119A_6	GTGGATACATCCCCCACAC	Hepatocellular carcinoma
NDUFB8_c.355A>G_p.T119A	NDUFB8_c.355A>G_p.T119A_2	ATACATCCCCCACACCTGT	Hepatocellular carcinoma
NDUFB8_c.355A>G_p.T119A	NDUFB8_c.355A>G_p.T119A_3	GATACATCCCCCACACCTG	Hepatocellular carcinoma
NDUFB8_c.355A>G_p.T119A	NDUFB8_c.355A>G_p.T119A_4	GGATACATCCCCCACACCT	Hepatocellular carcinoma
NDUFB8_c.355A>G_p.T119A	NDUFB8_c.355A>G_p.T119A_5	TGGATACATCCCCCACACC	Hepatocellular carcinoma
NRAP_c.2501T>C_p.I834T	NRAP_c.2501T>C_p.I834T_4	CCCAATGAGCTTCCCTCTG	Non small cell carcinoma
NRAP_c.2501T>C_p.I834T	NRAP_c.2501T>C_p.I834T_5	CCCCAATGAGCTTCCCTCT	Non small cell carcinoma
NRAP_c.2501T>C_p.I834T	NRAP_c.2501T>C_p.I834T_6	GCCCCAATGAGCTTCCCTC	Non small cell carcinoma
NRAP_c.2501T>C_p.I834T	NRAP_c.2501T>C_p.I834T_3	CCAATGAGCTTCCCTCTGG	Non small cell carcinoma
NRAP_c.2501T>C_p.I834T	NRAP_c.2501T>C_p.I834T_2	CAATGAGCTTCCCTCTGGA	Non small cell carcinoma
FAM160B1_c.2276A>G_p.Y759C	FAM160B1_c.2276A>G_p.Y759C_2	ATATCATGCTTCCTCCACA	Hepatocellular carcinoma
FAM160B1_c.2276A>G_p.Y759C	FAM160B1_c.2276A>G_p.Y759C_5	AAAATATCATGCTTCCTCC	Hepatocellular carcinoma
FAM160B1_c.2276A>G_p.Y759C	FAM160B1_c.2276A>G_p.Y759C_6	TAAAATATCATGCTTCCTC	Hepatocellular carcinoma
FAM160B1_c.2276A>G_p.Y759C	FAM160B1_c.2276A>G_p.Y759C_3	AATATCATGCTTCCTCCAC	Hepatocellular carcinoma
FAM160B1_c.2276A>G_p.Y759C	FAM160B1_c.2276A>G_p.Y759C_4	AAATATCATGCTTCCTCCA	Hepatocellular carcinoma
USP6NL_c.44A>G_p.Y15C	USP6NL_c.44A>G_p.Y15C_3	ATTATCTCACAAAGGGTAA	Hepatocellular carcinoma
USP6NL_c.44A>G_p.Y15C	USP6NL_c.44A>G_p.Y15C_4	GATTATCTCACAAAGGGTA	Hepatocellular carcinoma
USP6NL_c.44A>G_p.Y15C	USP6NL_c.44A>G_p.Y15C_5	TGATTATCTCACAAAGGGT	Hepatocellular carcinoma
USP6NL_c.44A>G_p.Y15C	USP6NL_c.44A>G_p.Y15C_2	TTATCTCACAAAGGGTAAA	Hepatocellular carcinoma
USP6NL_c.44A>G_p.Y15C	USP6NL_c.44A>G_p.Y15C_6	CTGATTATCTCACAAAGGG	Hepatocellular carcinoma
DHTKD1_c.1048A>G_p.N350D	DHTKD1_c.1048A>G_p.N350D_3	TCCAATCTCCCACATTTCA	Non small cell carcinoma
DHTKD1_c.1048A>G_p.N350D	DHTKD1_c.1048A>G_p.N350D_4	GTCCAATCTCCCACATTTC	Non small cell carcinoma
DHTKD1_c.1048A>G_p.N350D	DHTKD1_c.1048A>G_p.N350D_5	TGTCCAATCTCCCACATTT	Non small cell carcinoma
DHTKD1_c.1048A>G_p.N350D	DHTKD1_c.1048A>G_p.N350D_2	CCAATCTCCCACATTTCAG	Non small cell carcinoma
DHTKD1_c.1048A>G_p.N350D	DHTKD1_c.1048A>G_p.N350D_6	CTGTCCAATCTCCCACATT	Non small cell carcinoma
ZRANB1_c.1118A>G_p.Y373C	ZRANB1_c.1118A>G_p.Y373C_3	GCTATTTTCTGACTGACCT	BRCA_HER-positive carcinoma
ZRANB1_c.1118A>G_p.Y373C	ZRANB1_c.1118A>G_p.Y373C_4	TGCTATTTTCTGACTGACC	BRCA_HER-positive carcinoma
ZRANB1_c.1118A>G_p.Y373C	ZRANB1_c.1118A>G_p.Y373C_2	CTATTTTCTGACTGACCTT	BRCA_HER-positive carcinoma
ZRANB1_c.1118A>G_p.Y373C	ZRANB1_c.1118A>G_p.Y373C_6	CTTGCTATTTTCTGACTGA	BRCA_HER-positive carcinoma
ZRANB1_c.1118A>G_p.Y373C	ZRANB1_c.1118A>G_p.Y373C_5	TTGCTATTTTCTGACTGAC	BRCA_HER-positive carcinoma
C10orf90_c.1796A>G_p.Q599R	C10orf90_c.1796A>G_p.Q599R_2	CCAGCAGAGGAAAGCCCAG	BRCA_HER-positive carcinoma
C10orf90_c.1796A>G_p.Q599R	C10orf90_c.1796A>G_p.Q599R_3	TCCAGCAGAGGAAAGCCCA	BRCA_HER-positive carcinoma
C10orf90_c.1796A>G_p.Q599R	C10orf90_c.1796A>G_p.Q599R_6	TGGTCCAGCAGAGGAAAGC	BRCA_HER-positive carcinoma
C10orf90_c.1796A>G_p.Q599R	C10orf90_c.1796A>G_p.Q599R_4	GTCCAGCAGAGGAAAGCCC	BRCA_HER-positive carcinoma
C10orf90_c.1796A>G_p.Q599R	C10orf90_c.1796A>G_p.Q599R_5	GGTCCAGCAGAGGAAAGCC	BRCA_HER-positive carcinoma
CFAP46_c.5099A>G_p.H1700R	CFAP46_c.5099A>G_p.H1700R_2	TCACATATTTCAGAAGCTC	Hepatocellular carcinoma
CFAP46_c.5099A>G_p.H1700R	CFAP46_c.5099A>G_p.H1700R_3	GTCACATATTTCAGAAGCT	Hepatocellular carcinoma
CFAP46_c.5099A>G_p.H1700R	CFAP46_c.5099A>G_p.H1700R_6	TGTGTCACATATTTCAGAA	Hepatocellular carcinoma
CFAP46_c.5099A>G_p.H1700R	CFAP46_c.5099A>G_p.H1700R_4	TGTCACATATTTCAGAAGC	Hepatocellular carcinoma
CFAP46_c.5099A>G_p.H1700R	CFAP46_c.5099A>G_p.H1700R_5	GTGTCACATATTTCAGAAG	Hepatocellular carcinoma
CUBN_c.3763A>G_p.M1255V	CUBN_c.3763A>G_p.M1255V_2	GCATGTTTATAAAACTGAG	Hepatocellular carcinoma
CUBN_c.3763A>G_p.M1255V	CUBN_c.3763A>G_p.M1255V_6	GACAGCATGTTTATAAAAC	Hepatocellular carcinoma
CUBN_c.3763A>G_p.M1255V	CUBN_c.3763A>G_p.M1255V_3	AGCATGTTTATAAAACTGA	Hepatocellular carcinoma
CUBN_c.3763A>G_p.M1255V	CUBN_c.3763A>G_p.M1255V_4	CAGCATGTTTATAAAACTG	Hepatocellular carcinoma
CUBN_c.3763A>G_p.M1255V	CUBN_c.3763A>G_p.M1255V_5	ACAGCATGTTTATAAAACT	Hepatocellular carcinoma
NSUN6_c.893T>C_p.V298A	NSUN6_c.893T>C_p.V298A_3	TTAACCGCCTTTGTTCCAT	Small cell carcinoma
NSUN6_c.893T>C_p.V298A	NSUN6_c.893T>C_p.V298A_4	TTTAACCGCCTTTGTTCCA	Small cell carcinoma
NSUN6_c.893T>C_p.V298A	NSUN6_c.893T>C_p.V298A_5	GTTTAACCGCCTTTGTTCC	Small cell carcinoma
NSUN6_c.893T>C_p.V298A	NSUN6_c.893T>C_p.V298A_6	AGTTTAACCGCCTTTGTTC	Small cell carcinoma
NSUN6_c.893T>C_p.V298A	NSUN6_c.893T>C_p.V298A_2	TAACCGCCTTTGTTCCATC	Small cell carcinoma
C10orf113_c.22A>G_p.I8V	C10orf113_c.22A>G_p.I8V_2	GAATCTACTCTATGGAAAG	Hepatocellular carcinoma
C10orf113_c.22A>G_p.I8V	C10orf113_c.22A>G_p.I8V_4	AAGAATCTACTCTATGGAA	Hepatocellular carcinoma
C10orf113_c.22A>G_p.I8V	C10orf113_c.22A>G_p.I8V_5	GAAGAATCTACTCTATGGA	Hepatocellular carcinoma
C10orf113_c.22A>G_p.I8V	C10orf113_c.22A>G_p.I8V_6	AGAAGAATCTACTCTATGG	Hepatocellular carcinoma
C10orf113_c.22A>G_p.I8V	C10orf113_c.22A>G_p.I8V_3	AGAATCTACTCTATGGAAA	Hepatocellular carcinoma
EBLN1_c.436A>G_p.I146V	EBLN1_c.436A>G_p.I146V_2	GCATTGCTGCCGGATCGAG	Hepatocellular carcinoma
EBLN1_c.436A>G_p.I146V	EBLN1_c.436A>G_p.I146V_3	GGCATTGCTGCCGGATCGA	Hepatocellular carcinoma
EBLN1_c.436A>G_p.I146V	EBLN1_c.436A>G_p.I146V_4	AGGCATTGCTGCCGGATCG	Hepatocellular carcinoma
EBLN1_c.436A>G_p.I146V	EBLN1_c.436A>G_p.I146V_5	TAGGCATTGCTGCCGGATC	Hepatocellular carcinoma
EBLN1_c.436A>G_p.I146V	EBLN1_c.436A>G_p.I146V_6	ATAGGCATTGCTGCCGGAT	Hepatocellular carcinoma
KIAA1217_c.3709A>G_p.T1237A	KIAA1217_c.3709A>G_p.T1237A_3	AAAACTGAGATCATAATGA	Hepatocellular carcinoma
KIAA1217_c.3709A>G_p.T1237A	KIAA1217_c.3709A>G_p.T1237A_4	TAAAACTGAGATCATAATG	Hepatocellular carcinoma
KIAA1217_c.3709A>G_p.T1237A	KIAA1217_c.3709A>G_p.T1237A_5	ATAAAACTGAGATCATAAT	Hepatocellular carcinoma
KIAA1217_c.3709A>G_p.T1237A	KIAA1217_c.3709A>G_p.T1237A_2	AAACTGAGATCATAATGAA	Hepatocellular carcinoma
KIAA1217_c.3709A>G_p.T1237A	KIAA1217_c.3709A>G_p.T1237A_6	TATAAAACTGAGATCATAA	Hepatocellular carcinoma
ARMC4_c.2971T>C_p.S991P	ARMC4_c.2971T>C_p.S991P_2	TGAGAGTTGGTACAAGGCC	BRCA_HER-positive carcinoma
ARMC4_c.2971T>C_p.S991P	ARMC4_c.2971T>C_p.S991P_3	CTGAGAGTTGGTACAAGGC	BRCA_HER-positive carcinoma
ARMC4_c.2971T>C_p.S991P	ARMC4_c.2971T>C_p.S991P_4	TCTGAGAGTTGGTACAAGG	BRCA_HER-positive carcinoma
ARMC4_c.2971T>C_p.S991P	ARMC4_c.2971T>C_p.S991P_5	TTCTGAGAGTTGGTACAAG	BRCA_HER-positive carcinoma
ARMC4_c.2971T>C_p.S991P	ARMC4_c.2971T>C_p.S991P_6	CTTCTGAGAGTTGGTACAA	BRCA_HER-positive carcinoma
TUBB8_c.314A>G_p.H105R	TUBB8_c.314A>G_p.H105R_2	ACACTACACCGAAGGCGCG	Non small cell carcinoma
TUBB8_c.314A>G_p.H105R	TUBB8_c.314A>G_p.H105R_3	GACACTACACCGAAGGCGC	Non small cell carcinoma
TUBB8_c.314A>G_p.H105R	TUBB8_c.314A>G_p.H105R_5	GGGACACTACACCGAAGGC	Non small cell carcinoma
TUBB8_c.314A>G_p.H105R	TUBB8_c.314A>G_p.H105R_6	AGGGACACTACACCGAAGG	Non small cell carcinoma
TUBB8_c.314A>G_p.H105R	TUBB8_c.314A>G_p.H105R_4	GGACACTACACCGAAGGCG	Non small cell carcinoma
TET1_c.3316A>G_p.S1106G	TET1_c.3316A>G_p.S1106G_2	CAAGCCTTGTCACATGTAA	BRCA_Basal (triple-negative) carcinoma
TET1_c.3316A>G_p.S1106G	TET1_c.3316A>G_p.S1106G_3	ACAAGCCTTGTCACATGTA	BRCA_Basal (triple-negative) carcinoma
TET1_c.3316A>G_p.S1106G	TET1_c.3316A>G_p.S1106G_5	CAACAAGCCTTGTCACATG	BRCA_Basal (triple-negative) carcinoma
TET1_c.3316A>G_p.S1106G	TET1_c.3316A>G_p.S1106G_6	CCAACAAGCCTTGTCACAT	BRCA_Basal (triple-negative) carcinoma
TET1_c.3316A>G_p.S1106G	TET1_c.3316A>G_p.S1106G_4	AACAAGCCTTGTCACATGT	BRCA_Basal (triple-negative) carcinoma
GATA3_c.1315A>G_p.M439V	GATA3_c.1315A>G_p.M439V_2	GCATGGTCACCGCCATGGG	Small cell carcinoma
GATA3_c.1315A>G_p.M439V	GATA3_c.1315A>G_p.M439V_6	TCCAGCATGGTCACCGCCA	Small cell carcinoma
GATA3_c.1315A>G_p.M439V	GATA3_c.1315A>G_p.M439V_3	AGCATGGTCACCGCCATGG	Small cell carcinoma
GATA3_c.1315A>G_p.M439V	GATA3_c.1315A>G_p.M439V_4	CAGCATGGTCACCGCCATG	Small cell carcinoma
GATA3_c.1315A>G_p.M439V	GATA3_c.1315A>G_p.M439V_5	CCAGCATGGTCACCGCCAT	Small cell carcinoma
MMRN2_c.2836A>G_p.M946V	MMRN2_c.2836A>G_p.M946V_3	CTGATGTTTAAGACCTGAA	BRCA_HER-positive carcinoma
MMRN2_c.2836A>G_p.M946V	MMRN2_c.2836A>G_p.M946V_4	CCTGATGTTTAAGACCTGA	BRCA_HER-positive carcinoma
MMRN2_c.2836A>G_p.M946V	MMRN2_c.2836A>G_p.M946V_5	TCCTGATGTTTAAGACCTG	BRCA_HER-positive carcinoma
MMRN2_c.2836A>G_p.M946V	MMRN2_c.2836A>G_p.M946V_6	TTCCTGATGTTTAAGACCT	BRCA_HER-positive carcinoma
MMRN2_c.2836A>G_p.M946V	MMRN2_c.2836A>G_p.M946V_2	TGATGTTTAAGACCTGAAC	BRCA_HER-positive carcinoma
MUC6_c.6047T>C_p.L2016S	MUC6_c.6047T>C_p.L2016S_2	CCAAGGAGGTGGAGAAAGG	Small cell carcinoma
MUC6_c.6047T>C_p.L2016S	MUC6_c.6047T>C_p.L2016S_4	CACCAAGGAGGTGGAGAAA	Small cell carcinoma
MUC6_c.6047T>C_p.L2016S	MUC6_c.6047T>C_p.L2016S_5	TCACCAAGGAGGTGGAGAA	Small cell carcinoma
MUC6_c.6047T>C_p.L2016S	MUC6_c.6047T>C_p.L2016S_6	GTCACCAAGGAGGTGGAGA	Small cell carcinoma
MUC6_c.6047T>C_p.L2016S	MUC6_c.6047T>C_p.L2016S_3	ACCAAGGAGGTGGAGAAAG	Small cell carcinoma
ATM_c.2572T>C_p.F858L	ATM_c.2572T>C_p.F858L_2	AAATAGATTCATGGATGAC	BRCA_Basal (triple-negative) carcinoma
ATM_c.2572T>C_p.F858L	ATM_c.2572T>C_p.F858L_3	TAAATAGATTCATGGATGA	BRCA_Basal (triple-negative) carcinoma
ATM_c.2572T>C_p.F858L	ATM_c.2572T>C_p.F858L_4	TTAAATAGATTCATGGATG	BRCA_Basal (triple-negative) carcinoma
ATM_c.2572T>C_p.F858L	ATM_c.2572T>C_p.F858L_5	GTTAAATAGATTCATGGAT	BRCA_Basal (triple-negative) carcinoma
ATM_c.2572T>C_p.F858L	ATM_c.2572T>C_p.F858L_6	CGTTAAATAGATTCATGGA	BRCA_Basal (triple-negative) carcinoma
SDHD_c.359T>C_p.L120S	SDHD_c.359T>C_p.L120S_3	TGCAAGGCATCCCCATGAA	Non small cell carcinoma
SDHD_c.359T>C_p.L120S	SDHD_c.359T>C_p.L120S_4	CTGCAAGGCATCCCCATGA	Non small cell carcinoma
SDHD_c.359T>C_p.L120S	SDHD_c.359T>C_p.L120S_5	TCTGCAAGGCATCCCCATG	Non small cell carcinoma
SDHD_c.359T>C_p.L120S	SDHD_c.359T>C_p.L120S_2	GCAAGGCATCCCCATGAAC	Non small cell carcinoma
SDHD_c.359T>C_p.L120S	SDHD_c.359T>C_p.L120S_6	TTCTGCAAGGCATCCCCAT	Non small cell carcinoma
KMT2A_c.2880A>G_p.I960M	KMT2A_c.2880A>G_p.I960M_2	ATACTTATAAAGAAAGGGA	Small cell carcinoma
KMT2A_c.2880A>G_p.I960M	KMT2A_c.2880A>G_p.I960M_3	AATACTTATAAAGAAAGGG	Small cell carcinoma
KMT2A_c.2880A>G_p.I960M	KMT2A_c.2880A>G_p.I960M_4	AAATACTTATAAAGAAAGG	Small cell carcinoma
KMT2A_c.2880A>G_p.I960M	KMT2A_c.2880A>G_p.I960M_5	AAAATACTTATAAAGAAAG	Small cell carcinoma
KMT2A_c.2880A>G_p.I960M	KMT2A_c.2880A>G_p.I960M_6	CAAAATACTTATAAAGAAA	Small cell carcinoma
KMT2A_c.3532A>G_p.K1178E	KMT2A_c.3532A>G_p.K1178E_2	CCAAGTTTGGTGGTCGCAA	Hepatocellular carcinoma
KMT2A_c.3532A>G_p.K1178E	KMT2A_c.3532A>G_p.K1178E_3	CCCAAGTTTGGTGGTCGCA	Hepatocellular carcinoma
KMT2A_c.3532A>G_p.K1178E	KMT2A_c.3532A>G_p.K1178E_5	AGCCCAAGTTTGGTGGTCG	Hepatocellular carcinoma
KMT2A_c.3532A>G_p.K1178E	KMT2A_c.3532A>G_p.K1178E_6	AAGCCCAAGTTTGGTGGTC	Hepatocellular carcinoma
KMT2A_c.3532A>G_p.K1178E	KMT2A_c.3532A>G_p.K1178E_4	GCCCAAGTTTGGTGGTCGC	Hepatocellular carcinoma
MUC5B_c.2351T>C_p.L784P	MUC5B_c.2351T>C_p.L784P_2	CCAGGCAGCTTAGCTTCCC	BRCA_HER-positive carcinoma
MUC5B_c.2351T>C_p.L784P	MUC5B_c.2351T>C_p.L784P_3	CCCAGGCAGCTTAGCTTCC	BRCA_HER-positive carcinoma
MUC5B_c.2351T>C_p.L784P	MUC5B_c.2351T>C_p.L784P_5	CTCCCAGGCAGCTTAGCTT	BRCA_HER-positive carcinoma
MUC5B_c.2351T>C_p.L784P	MUC5B_c.2351T>C_p.L784P_6	GCTCCCAGGCAGCTTAGCT	BRCA_HER-positive carcinoma
MUC5B_c.2351T>C_p.L784P	MUC5B_c.2351T>C_p.L784P_4	TCCCAGGCAGCTTAGCTTC	BRCA_HER-positive carcinoma
OR10S1_c.890T>C_p.L297P	OR10S1_c.890T>C_p.L297P_2	TGAGCATTGGAGTTACGAT	Hepatocellular carcinoma
OR10S1_c.890T>C_p.L297P	OR10S1_c.890T>C_p.L297P_6	GGGTTGAGCATTGGAGTTA	Hepatocellular carcinoma
OR10S1_c.890T>C_p.L297P	OR10S1_c.890T>C_p.L297P_3	TTGAGCATTGGAGTTACGA	Hepatocellular carcinoma
OR10S1_c.890T>C_p.L297P	OR10S1_c.890T>C_p.L297P_4	GTTGAGCATTGGAGTTACG	Hepatocellular carcinoma
OR10S1_c.890T>C_p.L297P	OR10S1_c.890T>C_p.L297P_5	GGTTGAGCATTGGAGTTAC	Hepatocellular carcinoma
OR8B4_c.152T>C_p.I51T	OR8B4_c.152T>C_p.I51T_4	ATTTATCCCAATTAAGGTG	Small cell carcinoma
OR8B4_c.152T>C_p.I51T	OR8B4_c.152T>C_p.I51T_5	GATTTATCCCAATTAAGGT	Small cell carcinoma
OR8B4_c.152T>C_p.I51T	OR8B4_c.152T>C_p.I51T_6	GGATTTATCCCAATTAAGG	Small cell carcinoma
OR8B4_c.152T>C_p.I51T	OR8B4_c.152T>C_p.I51T_2	TTATCCCAATTAAGGTGAT	Small cell carcinoma
OR8B4_c.152T>C_p.I51T	OR8B4_c.152T>C_p.I51T_3	TTTATCCCAATTAAGGTGA	Small cell carcinoma
ABCC8_c.733A>G_p.I245V	ABCC8_c.733A>G_p.I245V_2	CCATCGACTTGCGAGCCAT	Hepatocellular carcinoma
ABCC8_c.733A>G_p.I245V	ABCC8_c.733A>G_p.I245V_3	CCCATCGACTTGCGAGCCA	Hepatocellular carcinoma
ABCC8_c.733A>G_p.I245V	ABCC8_c.733A>G_p.I245V_6	AAGCCCATCGACTTGCGAG	Hepatocellular carcinoma
ABCC8_c.733A>G_p.I245V	ABCC8_c.733A>G_p.I245V_4	GCCCATCGACTTGCGAGCC	Hepatocellular carcinoma
ABCC8_c.733A>G_p.I245V	ABCC8_c.733A>G_p.I245V_5	AGCCCATCGACTTGCGAGC	Hepatocellular carcinoma
KCNC1_c.1061T>C_p.L354S	KCNC1_c.1061T>C_p.L354S_2	CCAAGGCCAGGAAGATGAT	Hepatocellular carcinoma
KCNC1_c.1061T>C_p.L354S	KCNC1_c.1061T>C_p.L354S_4	GCCCAAGGCCAGGAAGATG	Hepatocellular carcinoma
KCNC1_c.1061T>C_p.L354S	KCNC1_c.1061T>C_p.L354S_5	CGCCCAAGGCCAGGAAGAT	Hepatocellular carcinoma
KCNC1_c.1061T>C_p.L354S	KCNC1_c.1061T>C_p.L354S_6	ACGCCCAAGGCCAGGAAGA	Hepatocellular carcinoma
KCNC1_c.1061T>C_p.L354S	KCNC1_c.1061T>C_p.L354S_3	CCCAAGGCCAGGAAGATGA	Hepatocellular carcinoma
SERGEF_c.650T>C_p.V217A	SERGEF_c.650T>C_p.V217A_4	AAGAACACACATTGCTTTA	Hepatocellular carcinoma
SERGEF_c.650T>C_p.V217A	SERGEF_c.650T>C_p.V217A_5	CAAGAACACACATTGCTTT	Hepatocellular carcinoma
SERGEF_c.650T>C_p.V217A	SERGEF_c.650T>C_p.V217A_6	GCAAGAACACACATTGCTT	Hepatocellular carcinoma
SERGEF_c.650T>C_p.V217A	SERGEF_c.650T>C_p.V217A_2	GAACACACATTGCTTTAGA	Hepatocellular carcinoma
SERGEF_c.650T>C_p.V217A	SERGEF_c.650T>C_p.V217A_3	AGAACACACATTGCTTTAG	Hepatocellular carcinoma
NLRP6_c.1256A>G_p.Y419C	NLRP6_c.1256A>G_p.Y419C_4	GTGTACCTGCTTTTCATCA	Small cell carcinoma
NLRP6_c.1256A>G_p.Y419C	NLRP6_c.1256A>G_p.Y419C_5	AGTGTACCTGCTTTTCATC	Small cell carcinoma
NLRP6_c.1256A>G_p.Y419C	NLRP6_c.1256A>G_p.Y419C_2	GTACCTGCTTTTCATCACC	Small cell carcinoma
NLRP6_c.1256A>G_p.Y419C	NLRP6_c.1256A>G_p.Y419C_3	TGTACCTGCTTTTCATCAC	Small cell carcinoma
NLRP6_c.1256A>G_p.Y419C	NLRP6_c.1256A>G_p.Y419C_6	CAGTGTACCTGCTTTTCAT	Small cell carcinoma
SLC1A2_c.1625A>G_p.H542R	SLC1A2_c.1625A>G_p.H542R_2	ACACAACTCTGTCATAGTA	Small cell carcinoma
SLC1A2_c.1625A>G_p.H542R	SLC1A2_c.1625A>G_p.H542R_3	CACACAACTCTGTCATAGT	Small cell carcinoma
SLC1A2_c.1625A>G_p.H542R	SLC1A2_c.1625A>G_p.H542R_4	GCACACAACTCTGTCATAG	Small cell carcinoma
SLC1A2_c.1625A>G_p.H542R	SLC1A2_c.1625A>G_p.H542R_6	CTGCACACAACTCTGTCAT	Small cell carcinoma
SLC1A2_c.1625A>G_p.H542R	SLC1A2_c.1625A>G_p.H542R_5	TGCACACAACTCTGTCATA	Small cell carcinoma
OR52M1_c.353T>C_p.L118P	OR52M1_c.353T>C_p.L118P_3	GCAAGGAAGATGCCTGACT	BRCA_HER-positive carcinoma
OR52M1_c.353T>C_p.L118P	OR52M1_c.353T>C_p.L118P_4	GGCAAGGAAGATGCCTGAC	BRCA_HER-positive carcinoma
OR52M1_c.353T>C_p.L118P	OR52M1_c.353T>C_p.L118P_2	CAAGGAAGATGCCTGACTC	BRCA_HER-positive carcinoma
OR52M1_c.353T>C_p.L118P	OR52M1_c.353T>C_p.L118P_5	TGGCAAGGAAGATGCCTGA	BRCA_HER-positive carcinoma
OR52M1_c.353T>C_p.L118P	OR52M1_c.353T>C_p.L118P_6	ATGGCAAGGAAGATGCCTG	BRCA_HER-positive carcinoma
CHST1_c.1172A>G_p.E391G	CHST1_c.1172A>G_p.E391G_2	GGAGGAGGAGCTGAAGAAC	Hepatocellular carcinoma
CHST1_c.1172A>G_p.E391G	CHST1_c.1172A>G_p.E391G_3	CGGAGGAGGAGCTGAAGAA	Hepatocellular carcinoma
CHST1_c.1172A>G_p.E391G	CHST1_c.1172A>G_p.E391G_4	TCGGAGGAGGAGCTGAAGA	Hepatocellular carcinoma
CHST1_c.1172A>G_p.E391G	CHST1_c.1172A>G_p.E391G_5	CTCGGAGGAGGAGCTGAAG	Hepatocellular carcinoma
CHST1_c.1172A>G_p.E391G	CHST1_c.1172A>G_p.E391G_6	CCTCGGAGGAGGAGCTGAA	Hepatocellular carcinoma
FOLH1_c.889A>G_p.I297V	FOLH1_c.889A>G_p.I297V_4	TCCAATTGGATACTATGAT	BRCA_HER-positive carcinoma
FOLH1_c.889A>G_p.I297V	FOLH1_c.889A>G_p.I297V_2	CAATTGGATACTATGATGC	BRCA_HER-positive carcinoma
FOLH1_c.889A>G_p.I297V	FOLH1_c.889A>G_p.I297V_5	ATCCAATTGGATACTATGA	BRCA_HER-positive carcinoma
FOLH1_c.889A>G_p.I297V	FOLH1_c.889A>G_p.I297V_6	CATCCAATTGGATACTATG	BRCA_HER-positive carcinoma
FOLH1_c.889A>G_p.I297V	FOLH1_c.889A>G_p.I297V_3	CCAATTGGATACTATGATG	BRCA_HER-positive carcinoma
TRIM48_c.131T>C_p.I44T	TRIM48_c.131T>C_p.I44T_2	CTATGGTGACCGGGTCTAT	Small cell carcinoma, Non small cell carcinoma
TRIM48_c.131T>C_p.I44T	TRIM48_c.131T>C_p.I44T_3	TCTATGGTGACCGGGTCTA	Small cell carcinoma, Non small cell carcinoma
TRIM48_c.131T>C_p.I44T	TRIM48_c.131T>C_p.I44T_5	AGTCTATGGTGACCGGGTC	Small cell carcinoma, Non small cell carcinoma
TRIM48_c.131T>C_p.I44T	TRIM48_c.131T>C_p.I44T_6	CAGTCTATGGTGACCGGGT	Small cell carcinoma, Non small cell carcinoma
TRIM48_c.131T>C_p.I44T	TRIM48_c.131T>C_p.I44T_4	GTCTATGGTGACCGGGTCT	Small cell carcinoma, Non small cell carcinoma
TRIM48_c.574T>C_p.Y192H	TRIM48_c.574T>C_p.Y192H_2	GTATAATATGTCTCCAAAA	CRC_Adenocarcinoma
TRIM48_c.574T>C_p.Y192H	TRIM48_c.574T>C_p.Y192H_3	TGTATAATATGTCTCCAAA	CRC_Adenocarcinoma
TRIM48_c.574T>C_p.Y192H	TRIM48_c.574T>C_p.Y192H_4	CTGTATAATATGTCTCCAA	CRC_Adenocarcinoma
TRIM48_c.574T>C_p.Y192H	TRIM48_c.574T>C_p.Y192H_5	CCTGTATAATATGTCTCCA	CRC_Adenocarcinoma
TRIM48_c.574T>C_p.Y192H	TRIM48_c.574T>C_p.Y192H_6	ACCTGTATAATATGTCTCC	CRC_Adenocarcinoma
OR5AS1_c.869A>G_p.Y290C	OR5AS1_c.869A>G_p.Y290C_3	TTTATAGTTTCAGAAACAA	BRCA_HER-positive carcinoma
OR5AS1_c.869A>G_p.Y290C	OR5AS1_c.869A>G_p.Y290C_4	ATTTATAGTTTCAGAAACA	BRCA_HER-positive carcinoma
OR5AS1_c.869A>G_p.Y290C	OR5AS1_c.869A>G_p.Y290C_5	AATTTATAGTTTCAGAAAC	BRCA_HER-positive carcinoma
OR5AS1_c.869A>G_p.Y290C	OR5AS1_c.869A>G_p.Y290C_6	TAATTTATAGTTTCAGAAA	BRCA_HER-positive carcinoma
OR5AS1_c.869A>G_p.Y290C	OR5AS1_c.869A>G_p.Y290C_2	TTATAGTTTCAGAAACAAG	BRCA_HER-positive carcinoma
OR5B3_c.131T>C_p.I44T	OR5B3_c.131T>C_p.I44T_3	ACAATAATTCCCAGGTTTC	Hepatocellular carcinoma
OR5B3_c.131T>C_p.I44T	OR5B3_c.131T>C_p.I44T_4	TACAATAATTCCCAGGTTT	Hepatocellular carcinoma
OR5B3_c.131T>C_p.I44T	OR5B3_c.131T>C_p.I44T_5	ATACAATAATTCCCAGGTT	Hepatocellular carcinoma
OR5B3_c.131T>C_p.I44T	OR5B3_c.131T>C_p.I44T_2	CAATAATTCCCAGGTTTCC	Hepatocellular carcinoma
OR5B3_c.131T>C_p.I44T	OR5B3_c.131T>C_p.I44T_6	AATACAATAATTCCCAGGT	Hepatocellular carcinoma
OR56A4_c.178T>C_p.S60P	OR56A4_c.178T>C_p.S60P_2	GGAGTCATTGCTGGGAGAT	Small cell carcinoma
OR56A4_c.178T>C_p.S60P	OR56A4_c.178T>C_p.S60P_3	TGGAGTCATTGCTGGGAGA	Small cell carcinoma
OR56A4_c.178T>C_p.S60P	OR56A4_c.178T>C_p.S60P_4	GTGGAGTCATTGCTGGGAG	Small cell carcinoma
OR56A4_c.178T>C_p.S60P	OR56A4_c.178T>C_p.S60P_6	CAGTGGAGTCATTGCTGGG	Small cell carcinoma
OR56A4_c.178T>C_p.S60P	OR56A4_c.178T>C_p.S60P_5	AGTGGAGTCATTGCTGGGA	Small cell carcinoma
ESRRA_c.272A>G_p.Y91C	ESRRA_c.272A>G_p.Y91C_2	CTATGGTGTGGCATCCTGT	Hepatocellular carcinoma
ESRRA_c.272A>G_p.Y91C	ESRRA_c.272A>G_p.Y91C_3	ACTATGGTGTGGCATCCTG	Hepatocellular carcinoma
ESRRA_c.272A>G_p.Y91C	ESRRA_c.272A>G_p.Y91C_4	CACTATGGTGTGGCATCCT	Hepatocellular carcinoma
ESRRA_c.272A>G_p.Y91C	ESRRA_c.272A>G_p.Y91C_6	ACCACTATGGTGTGGCATC	Hepatocellular carcinoma
ESRRA_c.272A>G_p.Y91C	ESRRA_c.272A>G_p.Y91C_5	CCACTATGGTGTGGCATCC	Hepatocellular carcinoma
PPP6R3_c.1866A>G_p.I622M	PPP6R3_c.1866A>G_p.I622M_2	ATATGGGAGGAAAAGCACA	Hepatocellular carcinoma
PPP6R3_c.1866A>G_p.I622M	PPP6R3_c.1866A>G_p.I622M_3	TATATGGGAGGAAAAGCAC	Hepatocellular carcinoma
PPP6R3_c.1866A>G_p.I622M	PPP6R3_c.1866A>G_p.I622M_4	ATATATGGGAGGAAAAGCA	Hepatocellular carcinoma
PPP6R3_c.1866A>G_p.I622M	PPP6R3_c.1866A>G_p.I622M_5	GATATATGGGAGGAAAAGC	Hepatocellular carcinoma
PPP6R3_c.1866A>G_p.I622M	PPP6R3_c.1866A>G_p.I622M_6	AGATATATGGGAGGAAAAG	Hepatocellular carcinoma
CPT1A_c.1472T>C_p.I491T	CPT1A_c.1472T>C_p.I491T_4	GTCAATGGACATGACGTAC	BRCA_HER-positive carcinoma
CPT1A_c.1472T>C_p.I491T	CPT1A_c.1472T>C_p.I491T_2	CAATGGACATGACGTACTG	BRCA_HER-positive carcinoma
CPT1A_c.1472T>C_p.I491T	CPT1A_c.1472T>C_p.I491T_5	TGTCAATGGACATGACGTA	BRCA_HER-positive carcinoma
CPT1A_c.1472T>C_p.I491T	CPT1A_c.1472T>C_p.I491T_6	CTGTCAATGGACATGACGT	BRCA_HER-positive carcinoma
CPT1A_c.1472T>C_p.I491T	CPT1A_c.1472T>C_p.I491T_3	TCAATGGACATGACGTACT	BRCA_HER-positive carcinoma
SHANK2_c.2734A>G_p.S912G	SHANK2_c.2734A>G_p.S912G_2	GCAGCGACCACCACCTCGA	Hepatocellular carcinoma
SHANK2_c.2734A>G_p.S912G	SHANK2_c.2734A>G_p.S912G_3	AGCAGCGACCACCACCTCG	Hepatocellular carcinoma
SHANK2_c.2734A>G_p.S912G	SHANK2_c.2734A>G_p.S912G_5	GTAGCAGCGACCACCACCT	Hepatocellular carcinoma
SHANK2_c.2734A>G_p.S912G	SHANK2_c.2734A>G_p.S912G_6	AGTAGCAGCGACCACCACC	Hepatocellular carcinoma
SHANK2_c.2734A>G_p.S912G	SHANK2_c.2734A>G_p.S912G_4	TAGCAGCGACCACCACCTC	Hepatocellular carcinoma
AP000812.5_c.302T>C_p.F101S	AP000812.5_c.302T>C_p.F101S_2	AGAAAGTTGTTAGGACCTG	Hepatocellular carcinoma
AP000812.5_c.302T>C_p.F101S	AP000812.5_c.302T>C_p.F101S_3	AAGAAAGTTGTTAGGACCT	Hepatocellular carcinoma
AP000812.5_c.302T>C_p.F101S	AP000812.5_c.302T>C_p.F101S_4	GAAGAAAGTTGTTAGGACC	Hepatocellular carcinoma
AP000812.5_c.302T>C_p.F101S	AP000812.5_c.302T>C_p.F101S_5	TGAAGAAAGTTGTTAGGAC	Hepatocellular carcinoma
AP000812.5_c.302T>C_p.F101S	AP000812.5_c.302T>C_p.F101S_6	TTGAAGAAAGTTGTTAGGA	Hepatocellular carcinoma
PCF11_c.2216A>G_p.N739S	PCF11_c.2216A>G_p.N739S_3	CAAATCAGCGACTTACAGC	BRCA_HER-positive carcinoma
PCF11_c.2216A>G_p.N739S	PCF11_c.2216A>G_p.N739S_4	ACAAATCAGCGACTTACAG	BRCA_HER-positive carcinoma
PCF11_c.2216A>G_p.N739S	PCF11_c.2216A>G_p.N739S_5	TACAAATCAGCGACTTACA	BRCA_HER-positive carcinoma
PCF11_c.2216A>G_p.N739S	PCF11_c.2216A>G_p.N739S_6	ATACAAATCAGCGACTTAC	BRCA_HER-positive carcinoma
PCF11_c.2216A>G_p.N739S	PCF11_c.2216A>G_p.N739S_2	AAATCAGCGACTTACAGCT	BRCA_HER-positive carcinoma
ST5_c.1472T>C_p.I491T	ST5_c.1472T>C_p.I491T_3	ACAATATCTTCATAGGCAT	Hepatocellular carcinoma
ST5_c.1472T>C_p.I491T	ST5_c.1472T>C_p.I491T_4	CACAATATCTTCATAGGCA	Hepatocellular carcinoma
ST5_c.1472T>C_p.I491T	ST5_c.1472T>C_p.I491T_5	CCACAATATCTTCATAGGC	Hepatocellular carcinoma
ST5_c.1472T>C_p.I491T	ST5_c.1472T>C_p.I491T_2	CAATATCTTCATAGGCATT	Hepatocellular carcinoma
ST5_c.1472T>C_p.I491T	ST5_c.1472T>C_p.I491T_6	CCCACAATATCTTCATAGG	Hepatocellular carcinoma
SCUBE2_c.1258A>G_p.N420D	SCUBE2_c.1258A>G_p.N420D_2	TGAACACAGTGGGCAGCTA	Hepatocellular carcinoma
SCUBE2_c.1258A>G_p.N420D	SCUBE2_c.1258A>G_p.N420D_3	GTGAACACAGTGGGCAGCT	Hepatocellular carcinoma
SCUBE2_c.1258A>G_p.N420D	SCUBE2_c.1258A>G_p.N420D_4	TGTGAACACAGTGGGCAGC	Hepatocellular carcinoma
SCUBE2_c.1258A>G_p.N420D	SCUBE2_c.1258A>G_p.N420D_6	TGTGTGAACACAGTGGGCA	Hepatocellular carcinoma
SCUBE2_c.1258A>G_p.N420D	SCUBE2_c.1258A>G_p.N420D_5	GTGTGAACACAGTGGGCAG	Hepatocellular carcinoma
FAT3_c.3029T>C_p.V1010A	FAT3_c.3029T>C_p.V1010A_2	GCACAGTAAGGTTATAGAA	BRCA_HER-positive carcinoma
FAT3_c.3029T>C_p.V1010A	FAT3_c.3029T>C_p.V1010A_3	CGCACAGTAAGGTTATAGA	BRCA_HER-positive carcinoma
FAT3_c.3029T>C_p.V1010A	FAT3_c.3029T>C_p.V1010A_4	CCGCACAGTAAGGTTATAG	BRCA_HER-positive carcinoma
FAT3_c.3029T>C_p.V1010A	FAT3_c.3029T>C_p.V1010A_6	GCCCGCACAGTAAGGTTAT	BRCA_HER-positive carcinoma
FAT3_c.3029T>C_p.V1010A	FAT3_c.3029T>C_p.V1010A_5	CCCGCACAGTAAGGTTATA	BRCA_HER-positive carcinoma
PRB2_c.154T>C_p.S52P	PRB2_c.154T>C_p.S52P_2	AGATGGGGGACCTTGAGGT	Hepatocellular carcinoma
PRB2_c.154T>C_p.S52P	PRB2_c.154T>C_p.S52P_3	GAGATGGGGGACCTTGAGG	Hepatocellular carcinoma
PRB2_c.154T>C_p.S52P	PRB2_c.154T>C_p.S52P_4	GGAGATGGGGGACCTTGAG	Hepatocellular carcinoma
PRB2_c.154T>C_p.S52P	PRB2_c.154T>C_p.S52P_5	AGGAGATGGGGGACCTTGA	Hepatocellular carcinoma
PRB2_c.154T>C_p.S52P	PRB2_c.154T>C_p.S52P_6	GAGGAGATGGGGGACCTTG	Hepatocellular carcinoma
MED13L_c.6445A>G_p.N2149D	MED13L_c.6445A>G_p.N2149D_6	GCCAGGAATTCTCAGCGGG	Small cell carcinoma
MED13L_c.6445A>G_p.N2149D	MED13L_c.6445A>G_p.N2149D_2	GGAATTCTCAGCGGGTTCC	Small cell carcinoma
MED13L_c.6445A>G_p.N2149D	MED13L_c.6445A>G_p.N2149D_5	CCAGGAATTCTCAGCGGGT	Small cell carcinoma
MED13L_c.6445A>G_p.N2149D	MED13L_c.6445A>G_p.N2149D_4	CAGGAATTCTCAGCGGGTT	Small cell carcinoma
MED13L_c.6445A>G_p.N2149D	MED13L_c.6445A>G_p.N2149D_3	AGGAATTCTCAGCGGGTTC	Small cell carcinoma
TESC_c.422A>G_p.E141G	TESC_c.422A>G_p.E141G_4	GAGGAGCTGCTGTCGGGAA	Hepatocellular carcinoma
TESC_c.422A>G_p.E141G	TESC_c.422A>G_p.E141G_5	CGAGGAGCTGCTGTCGGGA	Hepatocellular carcinoma
TESC_c.422A>G_p.E141G	TESC_c.422A>G_p.E141G_3	AGGAGCTGCTGTCGGGAAA	Hepatocellular carcinoma
TESC_c.422A>G_p.E141G	TESC_c.422A>G_p.E141G_2	GGAGCTGCTGTCGGGAAAC	Hepatocellular carcinoma
TESC_c.422A>G_p.E141G	TESC_c.422A>G_p.E141G_6	TCGAGGAGCTGCTGTCGGG	Hepatocellular carcinoma
LRP6_c.2993A>G_p.Q998R	LRP6_c.2993A>G_p.Q998R_4	AGCCAGGTAATTGAGAGCT	Non small cell carcinoma
LRP6_c.2993A>G_p.Q998R	LRP6_c.2993A>G_p.Q998R_2	CCAGGTAATTGAGAGCTTG	Non small cell carcinoma
LRP6_c.2993A>G_p.Q998R	LRP6_c.2993A>G_p.Q998R_3	GCCAGGTAATTGAGAGCTT	Non small cell carcinoma
LRP6_c.2993A>G_p.Q998R	LRP6_c.2993A>G_p.Q998R_5	CAGCCAGGTAATTGAGAGC	Non small cell carcinoma
LRP6_c.2993A>G_p.Q998R	LRP6_c.2993A>G_p.Q998R_6	GCAGCCAGGTAATTGAGAG	Non small cell carcinoma
HPD_c.722A>G_p.N241S	HPD_c.722A>G_p.N241S_2	CAATGAGCCAGCGCCTGGC	Hepatocellular carcinoma
HPD_c.722A>G_p.N241S	HPD_c.722A>G_p.N241S_3	TCAATGAGCCAGCGCCTGG	Hepatocellular carcinoma
HPD_c.722A>G_p.N241S	HPD_c.722A>G_p.N241S_6	CCATCAATGAGCCAGCGCC	Hepatocellular carcinoma
HPD_c.722A>G_p.N241S	HPD_c.722A>G_p.N241S_4	ATCAATGAGCCAGCGCCTG	Hepatocellular carcinoma
HPD_c.722A>G_p.N241S	HPD_c.722A>G_p.N241S_5	CATCAATGAGCCAGCGCCT	Hepatocellular carcinoma
TMEM132C_c.739A>G_p.R247G	TMEM132C_c.739A>G_p.R247G_3	TTCAGGAAGGGCAACGCCA	Hepatocellular carcinoma
TMEM132C_c.739A>G_p.R247G	TMEM132C_c.739A>G_p.R247G_2	TCAGGAAGGGCAACGCCAT	Hepatocellular carcinoma
TMEM132C_c.739A>G_p.R247G	TMEM132C_c.739A>G_p.R247G_4	CTTCAGGAAGGGCAACGCC	Hepatocellular carcinoma
TMEM132C_c.739A>G_p.R247G	TMEM132C_c.739A>G_p.R247G_5	ACTTCAGGAAGGGCAACGC	Hepatocellular carcinoma
TMEM132C_c.739A>G_p.R247G	TMEM132C_c.739A>G_p.R247G_6	GACTTCAGGAAGGGCAACG	Hepatocellular carcinoma
PLBD1_c.1109A>G_p.D370G	PLBD1_c.1109A>G_p.D370G_2	TGACAAAGGCACTCTGTAC	BRCA_HER-positive carcinoma
PLBD1_c.1109A>G_p.D370G	PLBD1_c.1109A>G_p.D370G_5	TCTTGACAAAGGCACTCTG	BRCA_HER-positive carcinoma
PLBD1_c.1109A>G_p.D370G	PLBD1_c.1109A>G_p.D370G_6	GTCTTGACAAAGGCACTCT	BRCA_HER-positive carcinoma
PLBD1_c.1109A>G_p.D370G	PLBD1_c.1109A>G_p.D370G_3	TTGACAAAGGCACTCTGTA	BRCA_HER-positive carcinoma
PLBD1_c.1109A>G_p.D370G	PLBD1_c.1109A>G_p.D370G_4	CTTGACAAAGGCACTCTGT	BRCA_HER-positive carcinoma
PIK3C2G_c.2474A>G_p.Q825R	PIK3C2G_c.2474A>G_p.Q825R_5	CTTGCAGAGCATCCAGGTT	BRCA_HER-positive carcinoma
PIK3C2G_c.2474A>G_p.Q825R	PIK3C2G_c.2474A>G_p.Q825R_6	CCTTGCAGAGCATCCAGGT	BRCA_HER-positive carcinoma
PIK3C2G_c.2474A>G_p.Q825R	PIK3C2G_c.2474A>G_p.Q825R_2	GCAGAGCATCCAGGTTGCC	BRCA_HER-positive carcinoma
PIK3C2G_c.2474A>G_p.Q825R	PIK3C2G_c.2474A>G_p.Q825R_3	TGCAGAGCATCCAGGTTGC	BRCA_HER-positive carcinoma
PIK3C2G_c.2474A>G_p.Q825R	PIK3C2G_c.2474A>G_p.Q825R_4	TTGCAGAGCATCCAGGTTG	BRCA_HER-positive carcinoma
C2CD5_c.1793A>G_p.Y598C	C2CD5_c.1793A>G_p.Y598C_5	TGTGTATTTAGCAGCTTTA	Hepatocellular carcinoma
C2CD5_c.1793A>G_p.Y598C	C2CD5_c.1793A>G_p.Y598C_2	GTATTTAGCAGCTTTACCA	Hepatocellular carcinoma
C2CD5_c.1793A>G_p.Y598C	C2CD5_c.1793A>G_p.Y598C_3	TGTATTTAGCAGCTTTACC	Hepatocellular carcinoma
C2CD5_c.1793A>G_p.Y598C	C2CD5_c.1793A>G_p.Y598C_4	GTGTATTTAGCAGCTTTAC	Hepatocellular carcinoma
C2CD5_c.1793A>G_p.Y598C	C2CD5_c.1793A>G_p.Y598C_6	GTGTGTATTTAGCAGCTTT	Hepatocellular carcinoma
CASC1_c.971A>G_p.E324G	CASC1_c.971A>G_p.E324G_5	AGTTGAGGAGGAACAAGGT	Hepatocellular carcinoma
CASC1_c.971A>G_p.E324G	CASC1_c.971A>G_p.E324G_6	AAGTTGAGGAGGAACAAGG	Hepatocellular carcinoma
CASC1_c.971A>G_p.E324G	CASC1_c.971A>G_p.E324G_2	TGAGGAGGAACAAGGTGAT	Hepatocellular carcinoma
CASC1_c.971A>G_p.E324G	CASC1_c.971A>G_p.E324G_3	TTGAGGAGGAACAAGGTGA	Hepatocellular carcinoma
CASC1_c.971A>G_p.E324G	CASC1_c.971A>G_p.E324G_4	GTTGAGGAGGAACAAGGTG	Hepatocellular carcinoma
KRAS_c.182A>G_p.Q61R	KRAS_c.182A>G_p.Q61R_2	TCAAGAGGAGTACAGTGCA	Non small cell carcinoma
KRAS_c.182A>G_p.Q61R	KRAS_c.182A>G_p.Q61R_3	GTCAAGAGGAGTACAGTGC	Non small cell carcinoma
KRAS_c.182A>G_p.Q61R	KRAS_c.182A>G_p.Q61R_4	GGTCAAGAGGAGTACAGTG	Non small cell carcinoma
KRAS_c.182A>G_p.Q61R	KRAS_c.182A>G_p.Q61R_5	AGGTCAAGAGGAGTACAGT	Non small cell carcinoma
KRAS_c.182A>G_p.Q61R	KRAS_c.182A>G_p.Q61R_6	CAGGTCAAGAGGAGTACAG	Non small cell carcinoma
DENND5B_c.1935A>G_p.I645M	DENND5B_c.1935A>G_p.I645M_2	ATATATCAGAAATGCAGCA	Non small cell carcinoma
DENND5B_c.1935A>G_p.I645M	DENND5B_c.1935A>G_p.I645M_3	TATATATCAGAAATGCAGC	Non small cell carcinoma
DENND5B_c.1935A>G_p.I645M	DENND5B_c.1935A>G_p.I645M_4	CTATATATCAGAAATGCAG	Non small cell carcinoma
DENND5B_c.1935A>G_p.I645M	DENND5B_c.1935A>G_p.I645M_5	TCTATATATCAGAAATGCA	Non small cell carcinoma
DENND5B_c.1935A>G_p.I645M	DENND5B_c.1935A>G_p.I645M_6	ATCTATATATCAGAAATGC	Non small cell carcinoma
CNTN1_c.1415A>G_p.N472S	CNTN1_c.1415A>G_p.N472S_4	ATCAACAACATTACAAGGA	Hepatocellular carcinoma
CNTN1_c.1415A>G_p.N472S	CNTN1_c.1415A>G_p.N472S_2	CAACAACATTACAAGGAAT	Hepatocellular carcinoma
CNTN1_c.1415A>G_p.N472S	CNTN1_c.1415A>G_p.N472S_3	TCAACAACATTACAAGGAA	Hepatocellular carcinoma
CNTN1_c.1415A>G_p.N472S	CNTN1_c.1415A>G_p.N472S_5	AATCAACAACATTACAAGG	Hepatocellular carcinoma
CNTN1_c.1415A>G_p.N472S	CNTN1_c.1415A>G_p.N472S_6	AAATCAACAACATTACAAG	Hepatocellular carcinoma
NELL2_c.2258A>G_p.Q753R	NELL2_c.2258A>G_p.Q753R_2	TCAAAATGGGGAAACTTTG	Hepatocellular carcinoma
NELL2_c.2258A>G_p.Q753R	NELL2_c.2258A>G_p.Q753R_3	ATCAAAATGGGGAAACTTT	Hepatocellular carcinoma
NELL2_c.2258A>G_p.Q753R	NELL2_c.2258A>G_p.Q753R_4	CATCAAAATGGGGAAACTT	Hepatocellular carcinoma
NELL2_c.2258A>G_p.Q753R	NELL2_c.2258A>G_p.Q753R_5	CCATCAAAATGGGGAAACT	Hepatocellular carcinoma
NELL2_c.2258A>G_p.Q753R	NELL2_c.2258A>G_p.Q753R_6	TCCATCAAAATGGGGAAAC	Hepatocellular carcinoma
FAM186A_c.218T>C_p.I73T	FAM186A_c.218T>C_p.I73T_2	TTATTTCACTCAGCTGCAT	Hepatocellular carcinoma
FAM186A_c.218T>C_p.I73T	FAM186A_c.218T>C_p.I73T_6	TTCATTATTTCACTCAGCT	Hepatocellular carcinoma
FAM186A_c.218T>C_p.I73T	FAM186A_c.218T>C_p.I73T_3	ATTATTTCACTCAGCTGCA	Hepatocellular carcinoma
FAM186A_c.218T>C_p.I73T	FAM186A_c.218T>C_p.I73T_4	CATTATTTCACTCAGCTGC	Hepatocellular carcinoma
FAM186A_c.218T>C_p.I73T	FAM186A_c.218T>C_p.I73T_5	TCATTATTTCACTCAGCTG	Hepatocellular carcinoma
GALNT6_c.893T>C_p.I298T	GALNT6_c.893T>C_p.I298T_2	CGATGTCTGGGCTCACCAC	Small cell carcinoma
GALNT6_c.893T>C_p.I298T	GALNT6_c.893T>C_p.I298T_3	ACGATGTCTGGGCTCACCA	Small cell carcinoma
GALNT6_c.893T>C_p.I298T	GALNT6_c.893T>C_p.I298T_4	GACGATGTCTGGGCTCACC	Small cell carcinoma
GALNT6_c.893T>C_p.I298T	GALNT6_c.893T>C_p.I298T_5	TGACGATGTCTGGGCTCAC	Small cell carcinoma
GALNT6_c.893T>C_p.I298T	GALNT6_c.893T>C_p.I298T_6	GTGACGATGTCTGGGCTCA	Small cell carcinoma
KRT6A_c.1456A>G_p.I486V	KRT6A_c.1456A>G_p.I486V_2	ACATCTGTAAGTACCTTTG	Non small cell carcinoma
KRT6A_c.1456A>G_p.I486V	KRT6A_c.1456A>G_p.I486V_3	AACATCTGTAAGTACCTTT	Non small cell carcinoma
KRT6A_c.1456A>G_p.I486V	KRT6A_c.1456A>G_p.I486V_4	CAACATCTGTAAGTACCTT	Non small cell carcinoma
KRT6A_c.1456A>G_p.I486V	KRT6A_c.1456A>G_p.I486V_5	TCAACATCTGTAAGTACCT	Non small cell carcinoma
KRT6A_c.1456A>G_p.I486V	KRT6A_c.1456A>G_p.I486V_6	GTCAACATCTGTAAGTACC	Non small cell carcinoma
KRT71_c.739A>G_p.N247D	KRT71_c.739A>G_p.N247D_5	ACGCCAATAAGGTGGAACT	Hepatocellular carcinoma
KRT71_c.739A>G_p.N247D	KRT71_c.739A>G_p.N247D_6	TACGCCAATAAGGTGGAAC	Hepatocellular carcinoma
KRT71_c.739A>G_p.N247D	KRT71_c.739A>G_p.N247D_2	CCAATAAGGTGGAACTGCA	Hepatocellular carcinoma
KRT71_c.739A>G_p.N247D	KRT71_c.739A>G_p.N247D_3	GCCAATAAGGTGGAACTGC	Hepatocellular carcinoma
KRT71_c.739A>G_p.N247D	KRT71_c.739A>G_p.N247D_4	CGCCAATAAGGTGGAACTG	Hepatocellular carcinoma
OR6C74_c.629T>C_p.V210A	OR6C74_c.629T>C_p.V210A_2	ATACCAGTGTAACCAGGAG	Small cell carcinoma
OR6C74_c.629T>C_p.V210A	OR6C74_c.629T>C_p.V210A_3	AATACCAGTGTAACCAGGA	Small cell carcinoma
OR6C74_c.629T>C_p.V210A	OR6C74_c.629T>C_p.V210A_4	TAATACCAGTGTAACCAGG	Small cell carcinoma
OR6C74_c.629T>C_p.V210A	OR6C74_c.629T>C_p.V210A_5	CTAATACCAGTGTAACCAG	Small cell carcinoma
OR6C74_c.629T>C_p.V210A	OR6C74_c.629T>C_p.V210A_6	ACTAATACCAGTGTAACCA	Small cell carcinoma
MMP19_c.764A>G_p.Y255C	MMP19_c.764A>G_p.Y255C_2	CTATGGTCAGTCCCTCCCC	BRCA_HER-positive carcinoma
MMP19_c.764A>G_p.Y255C	MMP19_c.764A>G_p.Y255C_3	TCTATGGTCAGTCCCTCCC	BRCA_HER-positive carcinoma
MMP19_c.764A>G_p.Y255C	MMP19_c.764A>G_p.Y255C_4	CTCTATGGTCAGTCCCTCC	BRCA_HER-positive carcinoma
MMP19_c.764A>G_p.Y255C	MMP19_c.764A>G_p.Y255C_5	TCTCTATGGTCAGTCCCTC	BRCA_HER-positive carcinoma
MMP19_c.764A>G_p.Y255C	MMP19_c.764A>G_p.Y255C_6	CTCTCTATGGTCAGTCCCT	BRCA_HER-positive carcinoma
ERBB3_c.506A>G_p.E169G	ERBB3_c.506A>G_p.E169G_4	GGGGAGCGGTTGGCACAGC	BRCA_Ductal carcinoma
ERBB3_c.506A>G_p.E169G	ERBB3_c.506A>G_p.E169G_2	GGAGCGGTTGGCACAGCCC	BRCA_Ductal carcinoma
ERBB3_c.506A>G_p.E169G	ERBB3_c.506A>G_p.E169G_3	GGGAGCGGTTGGCACAGCC	BRCA_Ductal carcinoma
ERBB3_c.506A>G_p.E169G	ERBB3_c.506A>G_p.E169G_5	GGGGGAGCGGTTGGCACAG	BRCA_Ductal carcinoma
ERBB3_c.506A>G_p.E169G	ERBB3_c.506A>G_p.E169G_6	AGGGGGAGCGGTTGGCACA	BRCA_Ductal carcinoma
NINJ2_c.322T>C_p.Y108H	NINJ2_c.322T>C_p.Y108H_2	GTAGTGAGAGGATGGTCCC	Small cell carcinoma
NINJ2_c.322T>C_p.Y108H	NINJ2_c.322T>C_p.Y108H_3	AGTAGTGAGAGGATGGTCC	Small cell carcinoma
NINJ2_c.322T>C_p.Y108H	NINJ2_c.322T>C_p.Y108H_4	TAGTAGTGAGAGGATGGTC	Small cell carcinoma
NINJ2_c.322T>C_p.Y108H	NINJ2_c.322T>C_p.Y108H_5	GTAGTAGTGAGAGGATGGT	Small cell carcinoma
NINJ2_c.322T>C_p.Y108H	NINJ2_c.322T>C_p.Y108H_6	TGTAGTAGTGAGAGGATGG	Small cell carcinoma
C1R_c.791T>C_p.I264T	C1R_c.791T>C_p.I264T_2	CAATGTTCTTCCCGTTGGC	BRCA_HER-positive carcinoma
C1R_c.791T>C_p.I264T	C1R_c.791T>C_p.I264T_6	TCGCCAATGTTCTTCCCGT	BRCA_HER-positive carcinoma
C1R_c.791T>C_p.I264T	C1R_c.791T>C_p.I264T_3	CCAATGTTCTTCCCGTTGG	BRCA_HER-positive carcinoma
C1R_c.791T>C_p.I264T	C1R_c.791T>C_p.I264T_4	GCCAATGTTCTTCCCGTTG	BRCA_HER-positive carcinoma
C1R_c.791T>C_p.I264T	C1R_c.791T>C_p.I264T_5	CGCCAATGTTCTTCCCGTT	BRCA_HER-positive carcinoma
GDF3_c.593T>C_p.F198S	GDF3_c.593T>C_p.F198S_2	CGAAATTTTTCCGGGGGTT	Hepatocellular carcinoma
GDF3_c.593T>C_p.F198S	GDF3_c.593T>C_p.F198S_3	CCGAAATTTTTCCGGGGGT	Hepatocellular carcinoma
GDF3_c.593T>C_p.F198S	GDF3_c.593T>C_p.F198S_4	CCCGAAATTTTTCCGGGGG	Hepatocellular carcinoma
GDF3_c.593T>C_p.F198S	GDF3_c.593T>C_p.F198S_5	ACCCGAAATTTTTCCGGGG	Hepatocellular carcinoma
GDF3_c.593T>C_p.F198S	GDF3_c.593T>C_p.F198S_6	AACCCGAAATTTTTCCGGG	Hepatocellular carcinoma
CCDC168_c.14127A>G_p.I4709M	CCDC168_c.14127A>G_p.I4709M_2	ATAAAAGAAGAGGAAGGTG	Hepatocellular carcinoma
CCDC168_c.14127A>G_p.I4709M	CCDC168_c.14127A>G_p.I4709M_3	AATAAAAGAAGAGGAAGGT	Hepatocellular carcinoma
CCDC168_c.14127A>G_p.I4709M	CCDC168_c.14127A>G_p.I4709M_4	CAATAAAAGAAGAGGAAGG	Hepatocellular carcinoma
CCDC168_c.14127A>G_p.I4709M	CCDC168_c.14127A>G_p.I4709M_5	TCAATAAAAGAAGAGGAAG	Hepatocellular carcinoma
CCDC168_c.14127A>G_p.I4709M	CCDC168_c.14127A>G_p.I4709M_6	CTCAATAAAAGAAGAGGAA	Hepatocellular carcinoma
COL4A2_c.106A>G_p.K36E	COL4A2_c.106A>G_p.K36E_6	GGTGTGAAGAAGTTTGATG	BRCA_HER-positive carcinoma
COL4A2_c.106A>G_p.K36E	COL4A2_c.106A>G_p.K36E_5	GTGTGAAGAAGTTTGATGT	BRCA_HER-positive carcinoma
COL4A2_c.106A>G_p.K36E	COL4A2_c.106A>G_p.K36E_2	TGAAGAAGTTTGATGTGCC	BRCA_HER-positive carcinoma
COL4A2_c.106A>G_p.K36E	COL4A2_c.106A>G_p.K36E_3	GTGAAGAAGTTTGATGTGC	BRCA_HER-positive carcinoma
COL4A2_c.106A>G_p.K36E	COL4A2_c.106A>G_p.K36E_4	TGTGAAGAAGTTTGATGTG	BRCA_HER-positive carcinoma
PSPC1_c.1474A>G_p.M492V	PSPC1_c.1474A>G_p.M492V_3	CCAATGAGTGGTGTAGGTC	Hepatocellular carcinoma
PSPC1_c.1474A>G_p.M492V	PSPC1_c.1474A>G_p.M492V_4	ACCAATGAGTGGTGTAGGT	Hepatocellular carcinoma
PSPC1_c.1474A>G_p.M492V	PSPC1_c.1474A>G_p.M492V_5	CACCAATGAGTGGTGTAGG	Hepatocellular carcinoma
PSPC1_c.1474A>G_p.M492V	PSPC1_c.1474A>G_p.M492V_6	GCACCAATGAGTGGTGTAG	Hepatocellular carcinoma
PSPC1_c.1474A>G_p.M492V	PSPC1_c.1474A>G_p.M492V_2	CAATGAGTGGTGTAGGTCC	Hepatocellular carcinoma
PARP4_c.3176A>G_p.Q1059R	PARP4_c.3176A>G_p.Q1059R_3	GGCAGCAACTCAATCCAGA	Small cell carcinoma
PARP4_c.3176A>G_p.Q1059R	PARP4_c.3176A>G_p.Q1059R_4	TGGCAGCAACTCAATCCAG	Small cell carcinoma
PARP4_c.3176A>G_p.Q1059R	PARP4_c.3176A>G_p.Q1059R_5	ATGGCAGCAACTCAATCCA	Small cell carcinoma
PARP4_c.3176A>G_p.Q1059R	PARP4_c.3176A>G_p.Q1059R_2	GCAGCAACTCAATCCAGAT	Small cell carcinoma
PARP4_c.3176A>G_p.Q1059R	PARP4_c.3176A>G_p.Q1059R_6	AATGGCAGCAACTCAATCC	Small cell carcinoma
RNF17_c.1209A>G_p.I403M	RNF17_c.1209A>G_p.I403M_2	ATAATTGAAGAAATTATTG	Hepatocellular carcinoma
RNF17_c.1209A>G_p.I403M	RNF17_c.1209A>G_p.I403M_3	GATAATTGAAGAAATTATT	Hepatocellular carcinoma
RNF17_c.1209A>G_p.I403M	RNF17_c.1209A>G_p.I403M_4	TGATAATTGAAGAAATTAT	Hepatocellular carcinoma
RNF17_c.1209A>G_p.I403M	RNF17_c.1209A>G_p.I403M_6	TGTGATAATTGAAGAAATT	Hepatocellular carcinoma
RNF17_c.1209A>G_p.I403M	RNF17_c.1209A>G_p.I403M_5	GTGATAATTGAAGAAATTA	Hepatocellular carcinoma
PABPC3_c.331A>G_p.N111D	PABPC3_c.331A>G_p.N111D_2	TTAATAATAAAGCACTGTA	Small cell carcinoma
PABPC3_c.331A>G_p.N111D	PABPC3_c.331A>G_p.N111D_3	ATTAATAATAAAGCACTGT	Small cell carcinoma
PABPC3_c.331A>G_p.N111D	PABPC3_c.331A>G_p.N111D_4	CATTAATAATAAAGCACTG	Small cell carcinoma
PABPC3_c.331A>G_p.N111D	PABPC3_c.331A>G_p.N111D_6	TCCATTAATAATAAAGCAC	Small cell carcinoma
PABPC3_c.331A>G_p.N111D	PABPC3_c.331A>G_p.N111D_5	CCATTAATAATAAAGCACT	Small cell carcinoma
PABPC3_c.1115A>G_p.E372G	PABPC3_c.1115A>G_p.E372G_2	AGAAGAGCGCCAGGCTTAC	Small cell carcinoma
PABPC3_c.1115A>G_p.E372G	PABPC3_c.1115A>G_p.E372G_3	AAGAAGAGCGCCAGGCTTA	Small cell carcinoma
PABPC3_c.1115A>G_p.E372G	PABPC3_c.1115A>G_p.E372G_4	AAAGAAGAGCGCCAGGCTT	Small cell carcinoma
PABPC3_c.1115A>G_p.E372G	PABPC3_c.1115A>G_p.E372G_5	CAAAGAAGAGCGCCAGGCT	Small cell carcinoma
PABPC3_c.1115A>G_p.E372G	PABPC3_c.1115A>G_p.E372G_6	GCAAAGAAGAGCGCCAGGC	Small cell carcinoma
PABPC3_c.1129T>C_p.Y377H	PABPC3_c.1129T>C_p.Y377H_2	GTAAGCCTGGCGCTCTTCT	Small cell carcinoma
PABPC3_c.1129T>C_p.Y377H	PABPC3_c.1129T>C_p.Y377H_4	AGGTAAGCCTGGCGCTCTT	Small cell carcinoma
PABPC3_c.1129T>C_p.Y377H	PABPC3_c.1129T>C_p.Y377H_5	GAGGTAAGCCTGGCGCTCT	Small cell carcinoma
PABPC3_c.1129T>C_p.Y377H	PABPC3_c.1129T>C_p.Y377H_6	TGAGGTAAGCCTGGCGCTC	Small cell carcinoma
PABPC3_c.1129T>C_p.Y377H	PABPC3_c.1129T>C_p.Y377H_3	GGTAAGCCTGGCGCTCTTC	Small cell carcinoma
PABPC3_c.1249T>C_p.Y417H	PABPC3_c.1249T>C_p.Y417H_2	ATAGTATGCAGCATGGTTC	Small cell carcinoma
PABPC3_c.1249T>C_p.Y417H	PABPC3_c.1249T>C_p.Y417H_4	GGATAGTATGCAGCATGGT	Small cell carcinoma
PABPC3_c.1249T>C_p.Y417H	PABPC3_c.1249T>C_p.Y417H_5	AGGATAGTATGCAGCATGG	Small cell carcinoma
PABPC3_c.1249T>C_p.Y417H	PABPC3_c.1249T>C_p.Y417H_6	GAGGATAGTATGCAGCATG	Small cell carcinoma
PABPC3_c.1249T>C_p.Y417H	PABPC3_c.1249T>C_p.Y417H_3	GATAGTATGCAGCATGGTT	Small cell carcinoma
PABPC3_c.1343T>C_p.I448T	PABPC3_c.1343T>C_p.I448T_6	GGGCGGATAGCACTGGGCT	Small cell carcinoma
PABPC3_c.1343T>C_p.I448T	PABPC3_c.1343T>C_p.I448T_5	GGCGGATAGCACTGGGCTT	Small cell carcinoma
PABPC3_c.1343T>C_p.I448T	PABPC3_c.1343T>C_p.I448T_2	GGATAGCACTGGGCTTATT	Small cell carcinoma
PABPC3_c.1343T>C_p.I448T	PABPC3_c.1343T>C_p.I448T_3	CGGATAGCACTGGGCTTAT	Small cell carcinoma
PABPC3_c.1343T>C_p.I448T	PABPC3_c.1343T>C_p.I448T_4	GCGGATAGCACTGGGCTTA	Small cell carcinoma
ATP8A2_c.2104T>C_p.W702R	ATP8A2_c.2104T>C_p.W702R_2	CCATATTTTAATTTCTGCC	BRCA_HER-positive carcinoma
ATP8A2_c.2104T>C_p.W702R	ATP8A2_c.2104T>C_p.W702R_3	CCCATATTTTAATTTCTGC	BRCA_HER-positive carcinoma
ATP8A2_c.2104T>C_p.W702R	ATP8A2_c.2104T>C_p.W702R_4	ACCCATATTTTAATTTCTG	BRCA_HER-positive carcinoma
ATP8A2_c.2104T>C_p.W702R	ATP8A2_c.2104T>C_p.W702R_5	CACCCATATTTTAATTTCT	BRCA_HER-positive carcinoma
ATP8A2_c.2104T>C_p.W702R	ATP8A2_c.2104T>C_p.W702R_6	ACACCCATATTTTAATTTC	BRCA_HER-positive carcinoma
FLT1_c.925T>C_p.Y309H	FLT1_c.925T>C_p.Y309H_2	ATAAAGTCCTTTGTCTTTG	BRCA_HER-positive carcinoma
FLT1_c.925T>C_p.Y309H	FLT1_c.925T>C_p.Y309H_3	TATAAAGTCCTTTGTCTTT	BRCA_HER-positive carcinoma
FLT1_c.925T>C_p.Y309H	FLT1_c.925T>C_p.Y309H_4	GTATAAAGTCCTTTGTCTT	BRCA_HER-positive carcinoma
FLT1_c.925T>C_p.Y309H	FLT1_c.925T>C_p.Y309H_5	AGTATAAAGTCCTTTGTCT	BRCA_HER-positive carcinoma
FLT1_c.925T>C_p.Y309H	FLT1_c.925T>C_p.Y309H_6	AAGTATAAAGTCCTTTGTC	BRCA_HER-positive carcinoma
ENOX1_c.1832T>C_p.M611T	ENOX1_c.1832T>C_p.M611T_5	GCCTCATCAAAAGCATTTC	Hepatocellular carcinoma
ENOX1_c.1832T>C_p.M611T	ENOX1_c.1832T>C_p.M611T_2	TCATCAAAAGCATTTCTAT	Hepatocellular carcinoma
ENOX1_c.1832T>C_p.M611T	ENOX1_c.1832T>C_p.M611T_3	CTCATCAAAAGCATTTCTA	Hepatocellular carcinoma
ENOX1_c.1832T>C_p.M611T	ENOX1_c.1832T>C_p.M611T_4	CCTCATCAAAAGCATTTCT	Hepatocellular carcinoma
ENOX1_c.1832T>C_p.M611T	ENOX1_c.1832T>C_p.M611T_6	AGCCTCATCAAAAGCATTT	Hepatocellular carcinoma
ERICH6B_c.415T>C_p.Y139H	ERICH6B_c.415T>C_p.Y139H_2	ATACTCTTCCTCCTCCAGA	CRC_Adenocarcinoma
ERICH6B_c.415T>C_p.Y139H	ERICH6B_c.415T>C_p.Y139H_3	GATACTCTTCCTCCTCCAG	CRC_Adenocarcinoma
ERICH6B_c.415T>C_p.Y139H	ERICH6B_c.415T>C_p.Y139H_4	AGATACTCTTCCTCCTCCA	CRC_Adenocarcinoma
ERICH6B_c.415T>C_p.Y139H	ERICH6B_c.415T>C_p.Y139H_5	CAGATACTCTTCCTCCTCC	CRC_Adenocarcinoma
ERICH6B_c.415T>C_p.Y139H	ERICH6B_c.415T>C_p.Y139H_6	CCAGATACTCTTCCTCCTC	CRC_Adenocarcinoma
ERICH6B_c.413A>G_p.E138G	ERICH6B_c.413A>G_p.E138G_2	AGAGTATCTGGGGAAGGAA	CRC_Adenocarcinoma
ERICH6B_c.413A>G_p.E138G	ERICH6B_c.413A>G_p.E138G_3	AAGAGTATCTGGGGAAGGA	CRC_Adenocarcinoma
ERICH6B_c.413A>G_p.E138G	ERICH6B_c.413A>G_p.E138G_4	GAAGAGTATCTGGGGAAGG	CRC_Adenocarcinoma
ERICH6B_c.413A>G_p.E138G	ERICH6B_c.413A>G_p.E138G_5	GGAAGAGTATCTGGGGAAG	CRC_Adenocarcinoma
ERICH6B_c.413A>G_p.E138G	ERICH6B_c.413A>G_p.E138G_6	AGGAAGAGTATCTGGGGAA	CRC_Adenocarcinoma
ERICH6B_c.404A>G_p.E135G	ERICH6B_c.404A>G_p.E135G_3	TGGAGGAGGAAGAGTATCT	CRC_Adenocarcinoma
ERICH6B_c.404A>G_p.E135G	ERICH6B_c.404A>G_p.E135G_2	GGAGGAGGAAGAGTATCTG	CRC_Adenocarcinoma
ERICH6B_c.404A>G_p.E135G	ERICH6B_c.404A>G_p.E135G_4	CTGGAGGAGGAAGAGTATC	CRC_Adenocarcinoma
ERICH6B_c.404A>G_p.E135G	ERICH6B_c.404A>G_p.E135G_5	TCTGGAGGAGGAAGAGTAT	CRC_Adenocarcinoma
ERICH6B_c.404A>G_p.E135G	ERICH6B_c.404A>G_p.E135G_6	ATCTGGAGGAGGAAGAGTA	CRC_Adenocarcinoma
PCDH17_c.1751T>C_p.V584A	PCDH17_c.1751T>C_p.V584A_2	GCACGATCACTGGCGCGTT	Hepatocellular carcinoma
PCDH17_c.1751T>C_p.V584A	PCDH17_c.1751T>C_p.V584A_3	AGCACGATCACTGGCGCGT	Hepatocellular carcinoma
PCDH17_c.1751T>C_p.V584A	PCDH17_c.1751T>C_p.V584A_4	GAGCACGATCACTGGCGCG	Hepatocellular carcinoma
PCDH17_c.1751T>C_p.V584A	PCDH17_c.1751T>C_p.V584A_5	GGAGCACGATCACTGGCGC	Hepatocellular carcinoma
PCDH17_c.1751T>C_p.V584A	PCDH17_c.1751T>C_p.V584A_6	GGGAGCACGATCACTGGCG	Hepatocellular carcinoma
LMO7_c.112T>C_p.C38R	LMO7_c.112T>C_p.C38R_6	GAGCACATATCAGTTGCCT	Hepatocellular carcinoma
LMO7_c.112T>C_p.C38R	LMO7_c.112T>C_p.C38R_5	AGCACATATCAGTTGCCTC	Hepatocellular carcinoma
LMO7_c.112T>C_p.C38R	LMO7_c.112T>C_p.C38R_2	ACATATCAGTTGCCTCCAA	Hepatocellular carcinoma
LMO7_c.112T>C_p.C38R	LMO7_c.112T>C_p.C38R_3	CACATATCAGTTGCCTCCA	Hepatocellular carcinoma
LMO7_c.112T>C_p.C38R	LMO7_c.112T>C_p.C38R_4	GCACATATCAGTTGCCTCC	Hepatocellular carcinoma
MARK3_c.400T>C_p.Y134H	MARK3_c.400T>C_p.Y134H_2	ATATTCCATGATTAGGTAG	Hepatocellular carcinoma
MARK3_c.400T>C_p.Y134H	MARK3_c.400T>C_p.Y134H_3	CATATTCCATGATTAGGTA	Hepatocellular carcinoma
MARK3_c.400T>C_p.Y134H	MARK3_c.400T>C_p.Y134H_4	GCATATTCCATGATTAGGT	Hepatocellular carcinoma
MARK3_c.400T>C_p.Y134H	MARK3_c.400T>C_p.Y134H_5	TGCATATTCCATGATTAGG	Hepatocellular carcinoma
MARK3_c.400T>C_p.Y134H	MARK3_c.400T>C_p.Y134H_6	TTGCATATTCCATGATTAG	Hepatocellular carcinoma
AHNAK2_c.844T>C_p.S282P	AHNAK2_c.844T>C_p.S282P_2	TGACGAGCTGTGTGACCTC	Hepatocellular carcinoma
AHNAK2_c.844T>C_p.S282P	AHNAK2_c.844T>C_p.S282P_3	CTGACGAGCTGTGTGACCT	Hepatocellular carcinoma
AHNAK2_c.844T>C_p.S282P	AHNAK2_c.844T>C_p.S282P_4	TCTGACGAGCTGTGTGACC	Hepatocellular carcinoma
AHNAK2_c.844T>C_p.S282P	AHNAK2_c.844T>C_p.S282P_5	CTCTGACGAGCTGTGTGAC	Hepatocellular carcinoma
AHNAK2_c.844T>C_p.S282P	AHNAK2_c.844T>C_p.S282P_6	CCTCTGACGAGCTGTGTGA	Hepatocellular carcinoma
ACIN1_c.3281A>G_p.Y1094C	ACIN1_c.3281A>G_p.Y1094C_5	GGATTATCACCGAGGCCTC	BRCA_HER-positive carcinoma
ACIN1_c.3281A>G_p.Y1094C	ACIN1_c.3281A>G_p.Y1094C_2	TTATCACCGAGGCCTCTTG	BRCA_HER-positive carcinoma
ACIN1_c.3281A>G_p.Y1094C	ACIN1_c.3281A>G_p.Y1094C_3	ATTATCACCGAGGCCTCTT	BRCA_HER-positive carcinoma
ACIN1_c.3281A>G_p.Y1094C	ACIN1_c.3281A>G_p.Y1094C_4	GATTATCACCGAGGCCTCT	BRCA_HER-positive carcinoma
ACIN1_c.3281A>G_p.Y1094C	ACIN1_c.3281A>G_p.Y1094C_6	TGGATTATCACCGAGGCCT	BRCA_HER-positive carcinoma
BAZ1A_c.4132A>G_p.R1378G	BAZ1A_c.4132A>G_p.R1378G_2	TCAGAGTCATTGCCACAAA	Hepatocellular carcinoma
BAZ1A_c.4132A>G_p.R1378G	BAZ1A_c.4132A>G_p.R1378G_3	TTCAGAGTCATTGCCACAA	Hepatocellular carcinoma
BAZ1A_c.4132A>G_p.R1378G	BAZ1A_c.4132A>G_p.R1378G_4	CTTCAGAGTCATTGCCACA	Hepatocellular carcinoma
BAZ1A_c.4132A>G_p.R1378G	BAZ1A_c.4132A>G_p.R1378G_5	ACTTCAGAGTCATTGCCAC	Hepatocellular carcinoma
BAZ1A_c.4132A>G_p.R1378G	BAZ1A_c.4132A>G_p.R1378G_6	AACTTCAGAGTCATTGCCA	Hepatocellular carcinoma
SMOC1_c.523A>G_p.K175E	SMOC1_c.523A>G_p.K175E_2	GGAAAGGTGAGTGGAGTTT	BRCA_HER-positive carcinoma
SMOC1_c.523A>G_p.K175E	SMOC1_c.523A>G_p.K175E_3	AGGAAAGGTGAGTGGAGTT	BRCA_HER-positive carcinoma
SMOC1_c.523A>G_p.K175E	SMOC1_c.523A>G_p.K175E_4	AAGGAAAGGTGAGTGGAGT	BRCA_HER-positive carcinoma
SMOC1_c.523A>G_p.K175E	SMOC1_c.523A>G_p.K175E_5	GAAGGAAAGGTGAGTGGAG	BRCA_HER-positive carcinoma
SMOC1_c.523A>G_p.K175E	SMOC1_c.523A>G_p.K175E_6	GGAAGGAAAGGTGAGTGGA	BRCA_HER-positive carcinoma
ENTPD5_c.154A>G_p.M52V	ENTPD5_c.154A>G_p.M52V_3	ATTATGTTTGATGCAGGGA	Hepatocellular carcinoma
ENTPD5_c.154A>G_p.M52V	ENTPD5_c.154A>G_p.M52V_2	TTATGTTTGATGCAGGGAG	Hepatocellular carcinoma
ENTPD5_c.154A>G_p.M52V	ENTPD5_c.154A>G_p.M52V_4	AATTATGTTTGATGCAGGG	Hepatocellular carcinoma
ENTPD5_c.154A>G_p.M52V	ENTPD5_c.154A>G_p.M52V_5	GAATTATGTTTGATGCAGG	Hepatocellular carcinoma
ENTPD5_c.154A>G_p.M52V	ENTPD5_c.154A>G_p.M52V_6	GGAATTATGTTTGATGCAG	Hepatocellular carcinoma
MLH3_c.1357A>G_p.M453V	MLH3_c.1357A>G_p.M453V_2	AAATGACAGAGCCATCTTT	BRCA_HER-positive carcinoma
MLH3_c.1357A>G_p.M453V	MLH3_c.1357A>G_p.M453V_3	AAAATGACAGAGCCATCTT	BRCA_HER-positive carcinoma
MLH3_c.1357A>G_p.M453V	MLH3_c.1357A>G_p.M453V_4	CAAAATGACAGAGCCATCT	BRCA_HER-positive carcinoma
MLH3_c.1357A>G_p.M453V	MLH3_c.1357A>G_p.M453V_5	GCAAAATGACAGAGCCATC	BRCA_HER-positive carcinoma
MLH3_c.1357A>G_p.M453V	MLH3_c.1357A>G_p.M453V_6	AGCAAAATGACAGAGCCAT	BRCA_HER-positive carcinoma
CEP128_c.2666A>G_p.K889R	CEP128_c.2666A>G_p.K889R_6	GAGAGAAAAATCTGCGACA	BRCA_HER-positive carcinoma
CEP128_c.2666A>G_p.K889R	CEP128_c.2666A>G_p.K889R_5	AGAGAAAAATCTGCGACAC	BRCA_HER-positive carcinoma
CEP128_c.2666A>G_p.K889R	CEP128_c.2666A>G_p.K889R_2	GAAAAATCTGCGACACCAG	BRCA_HER-positive carcinoma
CEP128_c.2666A>G_p.K889R	CEP128_c.2666A>G_p.K889R_3	AGAAAAATCTGCGACACCA	BRCA_HER-positive carcinoma
CEP128_c.2666A>G_p.K889R	CEP128_c.2666A>G_p.K889R_4	GAGAAAAATCTGCGACACC	BRCA_HER-positive carcinoma
SERPINA9_c.554A>G_p.N185S	SERPINA9_c.554A>G_p.N185S_3	CCAACCCCTCCATTGCCCA	Non small cell carcinoma
SERPINA9_c.554A>G_p.N185S	SERPINA9_c.554A>G_p.N185S_4	TCCAACCCCTCCATTGCCC	Non small cell carcinoma
SERPINA9_c.554A>G_p.N185S	SERPINA9_c.554A>G_p.N185S_5	CTCCAACCCCTCCATTGCC	Non small cell carcinoma
SERPINA9_c.554A>G_p.N185S	SERPINA9_c.554A>G_p.N185S_6	TCTCCAACCCCTCCATTGC	Non small cell carcinoma
SERPINA9_c.554A>G_p.N185S	SERPINA9_c.554A>G_p.N185S_2	CAACCCCTCCATTGCCCAG	Non small cell carcinoma
DICER1_c.2612A>G_p.D871G	DICER1_c.2612A>G_p.D871G_2	AGACGCTGATTCAGCATAC	Non small cell carcinoma
DICER1_c.2612A>G_p.D871G	DICER1_c.2612A>G_p.D871G_4	ACAGACGCTGATTCAGCAT	Non small cell carcinoma
DICER1_c.2612A>G_p.D871G	DICER1_c.2612A>G_p.D871G_5	TACAGACGCTGATTCAGCA	Non small cell carcinoma
DICER1_c.2612A>G_p.D871G	DICER1_c.2612A>G_p.D871G_6	CTACAGACGCTGATTCAGC	Non small cell carcinoma
DICER1_c.2612A>G_p.D871G	DICER1_c.2612A>G_p.D871G_3	CAGACGCTGATTCAGCATA	Non small cell carcinoma
OR4N4_c.842T>C_p.L281S	OR4N4_c.842T>C_p.L281S_2	TCAATGGAAAGATCACTGT	Small cell carcinoma
OR4N4_c.842T>C_p.L281S	OR4N4_c.842T>C_p.L281S_3	ATCAATGGAAAGATCACTG	Small cell carcinoma
OR4N4_c.842T>C_p.L281S	OR4N4_c.842T>C_p.L281S_4	CATCAATGGAAAGATCACT	Small cell carcinoma
OR4N4_c.842T>C_p.L281S	OR4N4_c.842T>C_p.L281S_5	TCATCAATGGAAAGATCAC	Small cell carcinoma
OR4N4_c.842T>C_p.L281S	OR4N4_c.842T>C_p.L281S_6	TTCATCAATGGAAAGATCA	Small cell carcinoma
HERC2_c.12760A>G_p.I4254V	HERC2_c.12760A>G_p.I4254V_3	GCCATCGCCACTGGCTCCC	Hepatocellular carcinoma
HERC2_c.12760A>G_p.I4254V	HERC2_c.12760A>G_p.I4254V_4	CGCCATCGCCACTGGCTCC	Hepatocellular carcinoma
HERC2_c.12760A>G_p.I4254V	HERC2_c.12760A>G_p.I4254V_5	TCGCCATCGCCACTGGCTC	Hepatocellular carcinoma
HERC2_c.12760A>G_p.I4254V	HERC2_c.12760A>G_p.I4254V_2	CCATCGCCACTGGCTCCCT	Hepatocellular carcinoma
HERC2_c.12760A>G_p.I4254V	HERC2_c.12760A>G_p.I4254V_6	ATCGCCATCGCCACTGGCT	Hepatocellular carcinoma
RYR3_c.10721A>G_p.D3574G	RYR3_c.10721A>G_p.D3574G_2	CGACCCTTTGTACACCTCC	Small cell carcinoma
RYR3_c.10721A>G_p.D3574G	RYR3_c.10721A>G_p.D3574G_3	ACGACCCTTTGTACACCTC	Small cell carcinoma
RYR3_c.10721A>G_p.D3574G	RYR3_c.10721A>G_p.D3574G_4	GACGACCCTTTGTACACCT	Small cell carcinoma
RYR3_c.10721A>G_p.D3574G	RYR3_c.10721A>G_p.D3574G_5	AGACGACCCTTTGTACACC	Small cell carcinoma
RYR3_c.10721A>G_p.D3574G	RYR3_c.10721A>G_p.D3574G_6	AAGACGACCCTTTGTACAC	Small cell carcinoma
MAPKBP1_c.1646A>G_p.H549R	MAPKBP1_c.1646A>G_p.H549R_2	CCATGTGCTGGATGCCGGG	Hepatocellular carcinoma
MAPKBP1_c.1646A>G_p.H549R	MAPKBP1_c.1646A>G_p.H549R_3	TCCATGTGCTGGATGCCGG	Hepatocellular carcinoma
MAPKBP1_c.1646A>G_p.H549R	MAPKBP1_c.1646A>G_p.H549R_5	GATCCATGTGCTGGATGCC	Hepatocellular carcinoma
MAPKBP1_c.1646A>G_p.H549R	MAPKBP1_c.1646A>G_p.H549R_6	TGATCCATGTGCTGGATGC	Hepatocellular carcinoma
MAPKBP1_c.1646A>G_p.H549R	MAPKBP1_c.1646A>G_p.H549R_4	ATCCATGTGCTGGATGCCG	Hepatocellular carcinoma
GANC_c.1060A>G_p.I354V	GANC_c.1060A>G_p.I354V_2	ACATTGGAGAAAAATAGCT	Hepatocellular carcinoma
GANC_c.1060A>G_p.I354V	GANC_c.1060A>G_p.I354V_3	GACATTGGAGAAAAATAGC	Hepatocellular carcinoma
GANC_c.1060A>G_p.I354V	GANC_c.1060A>G_p.I354V_5	CAGACATTGGAGAAAAATA	Hepatocellular carcinoma
GANC_c.1060A>G_p.I354V	GANC_c.1060A>G_p.I354V_6	ACAGACATTGGAGAAAAAT	Hepatocellular carcinoma
GANC_c.1060A>G_p.I354V	GANC_c.1060A>G_p.I354V_4	AGACATTGGAGAAAAATAG	Hepatocellular carcinoma
UBR1_c.3740A>G_p.N1247S	UBR1_c.3740A>G_p.N1247S_2	TAATATAAGACATGCTAAA	BRCA_HER-positive carcinoma
UBR1_c.3740A>G_p.N1247S	UBR1_c.3740A>G_p.N1247S_6	GTTATAATATAAGACATGC	BRCA_HER-positive carcinoma
UBR1_c.3740A>G_p.N1247S	UBR1_c.3740A>G_p.N1247S_3	ATAATATAAGACATGCTAA	BRCA_HER-positive carcinoma
UBR1_c.3740A>G_p.N1247S	UBR1_c.3740A>G_p.N1247S_4	TATAATATAAGACATGCTA	BRCA_HER-positive carcinoma
UBR1_c.3740A>G_p.N1247S	UBR1_c.3740A>G_p.N1247S_5	TTATAATATAAGACATGCT	BRCA_HER-positive carcinoma
DUOX2_c.4633T>C_p.Y1545H	DUOX2_c.4633T>C_p.Y1545H_3	CATAGTGGTGCATGAAGTG	BRCA_HER-positive carcinoma
DUOX2_c.4633T>C_p.Y1545H	DUOX2_c.4633T>C_p.Y1545H_2	ATAGTGGTGCATGAAGTGG	BRCA_HER-positive carcinoma
DUOX2_c.4633T>C_p.Y1545H	DUOX2_c.4633T>C_p.Y1545H_4	TCATAGTGGTGCATGAAGT	BRCA_HER-positive carcinoma
DUOX2_c.4633T>C_p.Y1545H	DUOX2_c.4633T>C_p.Y1545H_5	CTCATAGTGGTGCATGAAG	BRCA_HER-positive carcinoma
DUOX2_c.4633T>C_p.Y1545H	DUOX2_c.4633T>C_p.Y1545H_6	TCTCATAGTGGTGCATGAA	BRCA_HER-positive carcinoma
LEO1_c.1406A>G_p.N469S	LEO1_c.1406A>G_p.N469S_2	CAATCATCTTTTTATAAGA	Hepatocellular carcinoma
LEO1_c.1406A>G_p.N469S	LEO1_c.1406A>G_p.N469S_3	ACAATCATCTTTTTATAAG	Hepatocellular carcinoma
LEO1_c.1406A>G_p.N469S	LEO1_c.1406A>G_p.N469S_4	CACAATCATCTTTTTATAA	Hepatocellular carcinoma
LEO1_c.1406A>G_p.N469S	LEO1_c.1406A>G_p.N469S_5	CCACAATCATCTTTTTATA	Hepatocellular carcinoma
LEO1_c.1406A>G_p.N469S	LEO1_c.1406A>G_p.N469S_6	ACCACAATCATCTTTTTAT	Hepatocellular carcinoma
MYO5C_c.2197T>C_p.F733L	MYO5C_c.2197T>C_p.F733L_6	TACCAAACTGGTACTGATT	BRCA_HER-positive carcinoma
MYO5C_c.2197T>C_p.F733L	MYO5C_c.2197T>C_p.F733L_2	AAACTGGTACTGATTAGAA	BRCA_HER-positive carcinoma
MYO5C_c.2197T>C_p.F733L	MYO5C_c.2197T>C_p.F733L_3	CAAACTGGTACTGATTAGA	BRCA_HER-positive carcinoma
MYO5C_c.2197T>C_p.F733L	MYO5C_c.2197T>C_p.F733L_4	CCAAACTGGTACTGATTAG	BRCA_HER-positive carcinoma
MYO5C_c.2197T>C_p.F733L	MYO5C_c.2197T>C_p.F733L_5	ACCAAACTGGTACTGATTA	BRCA_HER-positive carcinoma
ARPP19_c.106A>G_p.M36V	ARPP19_c.106A>G_p.M36V_2	AAATGGAAGATAAAGTGAC	Hepatocellular carcinoma
ARPP19_c.106A>G_p.M36V	ARPP19_c.106A>G_p.M36V_3	GAAATGGAAGATAAAGTGA	Hepatocellular carcinoma
ARPP19_c.106A>G_p.M36V	ARPP19_c.106A>G_p.M36V_4	GGAAATGGAAGATAAAGTG	Hepatocellular carcinoma
ARPP19_c.106A>G_p.M36V	ARPP19_c.106A>G_p.M36V_5	AGGAAATGGAAGATAAAGT	Hepatocellular carcinoma
ARPP19_c.106A>G_p.M36V	ARPP19_c.106A>G_p.M36V_6	TAGGAAATGGAAGATAAAG	Hepatocellular carcinoma
FAM214A_c.2707A>G_p.I903V	FAM214A_c.2707A>G_p.I903V_2	GCATTGTTGATGGTTTTAC	Hepatocellular carcinoma
FAM214A_c.2707A>G_p.I903V	FAM214A_c.2707A>G_p.I903V_3	GGCATTGTTGATGGTTTTA	Hepatocellular carcinoma
FAM214A_c.2707A>G_p.I903V	FAM214A_c.2707A>G_p.I903V_4	CGGCATTGTTGATGGTTTT	Hepatocellular carcinoma
FAM214A_c.2707A>G_p.I903V	FAM214A_c.2707A>G_p.I903V_5	TCGGCATTGTTGATGGTTT	Hepatocellular carcinoma
FAM214A_c.2707A>G_p.I903V	FAM214A_c.2707A>G_p.I903V_6	CTCGGCATTGTTGATGGTT	Hepatocellular carcinoma
PYGO1_c.952A>G_p.T318A	PYGO1_c.952A>G_p.T318A_4	CTGCACCACAGAAAAAAGC	Small cell carcinoma
PYGO1_c.952A>G_p.T318A	PYGO1_c.952A>G_p.T318A_2	GCACCACAGAAAAAAGCAA	Small cell carcinoma
PYGO1_c.952A>G_p.T318A	PYGO1_c.952A>G_p.T318A_3	TGCACCACAGAAAAAAGCA	Small cell carcinoma
PYGO1_c.952A>G_p.T318A	PYGO1_c.952A>G_p.T318A_5	CCTGCACCACAGAAAAAAG	Small cell carcinoma
PYGO1_c.952A>G_p.T318A	PYGO1_c.952A>G_p.T318A_6	GCCTGCACCACAGAAAAAA	Small cell carcinoma
GLCE_c.248A>G_p.K83R	GLCE_c.248A>G_p.K83R_2	GAAAGCACCCCCTGTTGTT	Non small cell carcinoma
GLCE_c.248A>G_p.K83R	GLCE_c.248A>G_p.K83R_3	AGAAAGCACCCCCTGTTGT	Non small cell carcinoma
GLCE_c.248A>G_p.K83R	GLCE_c.248A>G_p.K83R_4	CAGAAAGCACCCCCTGTTG	Non small cell carcinoma
GLCE_c.248A>G_p.K83R	GLCE_c.248A>G_p.K83R_5	GCAGAAAGCACCCCCTGTT	Non small cell carcinoma
GLCE_c.248A>G_p.K83R	GLCE_c.248A>G_p.K83R_6	AGCAGAAAGCACCCCCTGT	Non small cell carcinoma
HEXA_c.203A>G_p.Y68C	HEXA_c.203A>G_p.Y68C_2	CTATCGTGACCTGCTTTTC	Hepatocellular carcinoma
HEXA_c.203A>G_p.Y68C	HEXA_c.203A>G_p.Y68C_6	AGCGCTATCGTGACCTGCT	Hepatocellular carcinoma
HEXA_c.203A>G_p.Y68C	HEXA_c.203A>G_p.Y68C_3	GCTATCGTGACCTGCTTTT	Hepatocellular carcinoma
HEXA_c.203A>G_p.Y68C	HEXA_c.203A>G_p.Y68C_4	CGCTATCGTGACCTGCTTT	Hepatocellular carcinoma
HEXA_c.203A>G_p.Y68C	HEXA_c.203A>G_p.Y68C_5	GCGCTATCGTGACCTGCTT	Hepatocellular carcinoma
CYP1A1_c.50T>C_p.V17A	CYP1A1_c.50T>C_p.V17A_3	ATGACAGAGGCCAGAAGAA	BRCA_HER-positive carcinoma
CYP1A1_c.50T>C_p.V17A	CYP1A1_c.50T>C_p.V17A_2	TGACAGAGGCCAGAAGAAA	BRCA_HER-positive carcinoma
CYP1A1_c.50T>C_p.V17A	CYP1A1_c.50T>C_p.V17A_4	GATGACAGAGGCCAGAAGA	BRCA_HER-positive carcinoma
CYP1A1_c.50T>C_p.V17A	CYP1A1_c.50T>C_p.V17A_5	AGATGACAGAGGCCAGAAG	BRCA_HER-positive carcinoma
CYP1A1_c.50T>C_p.V17A	CYP1A1_c.50T>C_p.V17A_6	AAGATGACAGAGGCCAGAA	BRCA_HER-positive carcinoma
PTPN9_c.458A>G_p.Y153C	PTPN9_c.458A>G_p.Y153C_2	CTATGACATGTGTGGTTCT	Hepatocellular carcinoma
PTPN9_c.458A>G_p.Y153C	PTPN9_c.458A>G_p.Y153C_3	TCTATGACATGTGTGGTTC	Hepatocellular carcinoma
PTPN9_c.458A>G_p.Y153C	PTPN9_c.458A>G_p.Y153C_4	ATCTATGACATGTGTGGTT	Hepatocellular carcinoma
PTPN9_c.458A>G_p.Y153C	PTPN9_c.458A>G_p.Y153C_5	TATCTATGACATGTGTGGT	Hepatocellular carcinoma
PTPN9_c.458A>G_p.Y153C	PTPN9_c.458A>G_p.Y153C_6	TTATCTATGACATGTGTGG	Hepatocellular carcinoma
VPS33B_c.125A>G_p.E42G	VPS33B_c.125A>G_p.E42G_6	TCATTGAGGCAGATCTCAT	Hepatocellular carcinoma
VPS33B_c.125A>G_p.E42G	VPS33B_c.125A>G_p.E42G_2	TGAGGCAGATCTCATGAGC	Hepatocellular carcinoma
VPS33B_c.125A>G_p.E42G	VPS33B_c.125A>G_p.E42G_3	TTGAGGCAGATCTCATGAG	Hepatocellular carcinoma
VPS33B_c.125A>G_p.E42G	VPS33B_c.125A>G_p.E42G_4	ATTGAGGCAGATCTCATGA	Hepatocellular carcinoma
VPS33B_c.125A>G_p.E42G	VPS33B_c.125A>G_p.E42G_5	CATTGAGGCAGATCTCATG	Hepatocellular carcinoma
BAIAP3_c.1424A>G_p.Y475C	BAIAP3_c.1424A>G_p.Y475C_2	CTACCTGCTGGGGCTGCTG	Hepatocellular carcinoma
BAIAP3_c.1424A>G_p.Y475C	BAIAP3_c.1424A>G_p.Y475C_3	GCTACCTGCTGGGGCTGCT	Hepatocellular carcinoma
BAIAP3_c.1424A>G_p.Y475C	BAIAP3_c.1424A>G_p.Y475C_4	AGCTACCTGCTGGGGCTGC	Hepatocellular carcinoma
BAIAP3_c.1424A>G_p.Y475C	BAIAP3_c.1424A>G_p.Y475C_5	CAGCTACCTGCTGGGGCTG	Hepatocellular carcinoma
BAIAP3_c.1424A>G_p.Y475C	BAIAP3_c.1424A>G_p.Y475C_6	ACAGCTACCTGCTGGGGCT	Hepatocellular carcinoma
PALB2_c.1676A>G_p.Q559R	PALB2_c.1676A>G_p.Q559R_2	TCAAGTGAAAGGTAAATCA	BRCA_Ductal carcinoma
PALB2_c.1676A>G_p.Q559R	PALB2_c.1676A>G_p.Q559R_3	TTCAAGTGAAAGGTAAATC	BRCA_Ductal carcinoma
PALB2_c.1676A>G_p.Q559R	PALB2_c.1676A>G_p.Q559R_4	ATTCAAGTGAAAGGTAAAT	BRCA_Ductal carcinoma
PALB2_c.1676A>G_p.Q559R	PALB2_c.1676A>G_p.Q559R_5	TATTCAAGTGAAAGGTAAA	BRCA_Ductal carcinoma
PALB2_c.1676A>G_p.Q559R	PALB2_c.1676A>G_p.Q559R_6	TTATTCAAGTGAAAGGTAA	BRCA_Ductal carcinoma
SULT1A2_c.464A>G_p.Q155R	SULT1A2_c.464A>G_p.Q155R_4	ATCCAAGCCTCCACTGAGG	Non small cell carcinoma
SULT1A2_c.464A>G_p.Q155R	SULT1A2_c.464A>G_p.Q155R_2	CCAAGCCTCCACTGAGGAG	Non small cell carcinoma
SULT1A2_c.464A>G_p.Q155R	SULT1A2_c.464A>G_p.Q155R_3	TCCAAGCCTCCACTGAGGA	Non small cell carcinoma
SULT1A2_c.464A>G_p.Q155R	SULT1A2_c.464A>G_p.Q155R_5	AATCCAAGCCTCCACTGAG	Non small cell carcinoma
SULT1A2_c.464A>G_p.Q155R	SULT1A2_c.464A>G_p.Q155R_6	CAATCCAAGCCTCCACTGA	Non small cell carcinoma
ATP2A1_c.893T>C_p.I298T	ATP2A1_c.893T>C_p.I298T_2	CAATCTTAAAGTAGTAGAT	BRCA_HER-positive carcinoma
ATP2A1_c.893T>C_p.I298T	ATP2A1_c.893T>C_p.I298T_3	GCAATCTTAAAGTAGTAGA	BRCA_HER-positive carcinoma
ATP2A1_c.893T>C_p.I298T	ATP2A1_c.893T>C_p.I298T_4	GGCAATCTTAAAGTAGTAG	BRCA_HER-positive carcinoma
ATP2A1_c.893T>C_p.I298T	ATP2A1_c.893T>C_p.I298T_5	CGGCAATCTTAAAGTAGTA	BRCA_HER-positive carcinoma
ATP2A1_c.893T>C_p.I298T	ATP2A1_c.893T>C_p.I298T_6	ACGGCAATCTTAAAGTAGT	BRCA_HER-positive carcinoma
ITGAX_c.2255T>C_p.M752T	ITGAX_c.2255T>C_p.M752T_2	GCATAGGCCGCAGGTTTCT	Hepatocellular carcinoma
ITGAX_c.2255T>C_p.M752T	ITGAX_c.2255T>C_p.M752T_6	GCCAGCATAGGCCGCAGGT	Hepatocellular carcinoma
ITGAX_c.2255T>C_p.M752T	ITGAX_c.2255T>C_p.M752T_3	AGCATAGGCCGCAGGTTTC	Hepatocellular carcinoma
ITGAX_c.2255T>C_p.M752T	ITGAX_c.2255T>C_p.M752T_4	CAGCATAGGCCGCAGGTTT	Hepatocellular carcinoma
ITGAX_c.2255T>C_p.M752T	ITGAX_c.2255T>C_p.M752T_5	CCAGCATAGGCCGCAGGTT	Hepatocellular carcinoma
RAB11FIP3_c.701A>G_p.Y234C	RAB11FIP3_c.701A>G_p.Y234C_5	GGTCTACGGGGCAGAGCAG	Hepatocellular carcinoma
RAB11FIP3_c.701A>G_p.Y234C	RAB11FIP3_c.701A>G_p.Y234C_4	GTCTACGGGGCAGAGCAGG	Hepatocellular carcinoma
RAB11FIP3_c.701A>G_p.Y234C	RAB11FIP3_c.701A>G_p.Y234C_6	CGGTCTACGGGGCAGAGCA	Hepatocellular carcinoma
RAB11FIP3_c.701A>G_p.Y234C	RAB11FIP3_c.701A>G_p.Y234C_3	TCTACGGGGCAGAGCAGGT	Hepatocellular carcinoma
RAB11FIP3_c.701A>G_p.Y234C	RAB11FIP3_c.701A>G_p.Y234C_2	CTACGGGGCAGAGCAGGTA	Hepatocellular carcinoma
CDH8_c.1946A>G_p.N649S	CDH8_c.1946A>G_p.N649S_3	AAAATGAACCATTAATTAT	Hepatocellular carcinoma
CDH8_c.1946A>G_p.N649S	CDH8_c.1946A>G_p.N649S_4	AAAAATGAACCATTAATTA	Hepatocellular carcinoma
CDH8_c.1946A>G_p.N649S	CDH8_c.1946A>G_p.N649S_2	AAATGAACCATTAATTATC	Hepatocellular carcinoma
CDH8_c.1946A>G_p.N649S	CDH8_c.1946A>G_p.N649S_5	TAAAAATGAACCATTAATT	Hepatocellular carcinoma
CDH8_c.1946A>G_p.N649S	CDH8_c.1946A>G_p.N649S_6	ATAAAAATGAACCATTAAT	Hepatocellular carcinoma
CDH8_c.1451T>C_p.I484T	CDH8_c.1451T>C_p.I484T_2	TAATAGCAACAGGTACTCG	Hepatocellular carcinoma
CDH8_c.1451T>C_p.I484T	CDH8_c.1451T>C_p.I484T_3	TTAATAGCAACAGGTACTC	Hepatocellular carcinoma
CDH8_c.1451T>C_p.I484T	CDH8_c.1451T>C_p.I484T_5	CTTTAATAGCAACAGGTAC	Hepatocellular carcinoma
CDH8_c.1451T>C_p.I484T	CDH8_c.1451T>C_p.I484T_6	ACTTTAATAGCAACAGGTA	Hepatocellular carcinoma
CDH8_c.1451T>C_p.I484T	CDH8_c.1451T>C_p.I484T_4	TTTAATAGCAACAGGTACT	Hepatocellular carcinoma
PLA2G15_c.86A>G_p.D29G	PLA2G15_c.86A>G_p.D29G_2	GGACCCAGCGCTCCCGGCC	Hepatocellular carcinoma
PLA2G15_c.86A>G_p.D29G	PLA2G15_c.86A>G_p.D29G_5	CGCGGACCCAGCGCTCCCG	Hepatocellular carcinoma
PLA2G15_c.86A>G_p.D29G	PLA2G15_c.86A>G_p.D29G_6	TCGCGGACCCAGCGCTCCC	Hepatocellular carcinoma
PLA2G15_c.86A>G_p.D29G	PLA2G15_c.86A>G_p.D29G_3	CGGACCCAGCGCTCCCGGC	Hepatocellular carcinoma
PLA2G15_c.86A>G_p.D29G	PLA2G15_c.86A>G_p.D29G_4	GCGGACCCAGCGCTCCCGG	Hepatocellular carcinoma
PDPR_c.1774A>G_p.T592A	PDPR_c.1774A>G_p.T592A_2	CAACCGACCAGCAGGTCCA	Non small cell carcinoma
PDPR_c.1774A>G_p.T592A	PDPR_c.1774A>G_p.T592A_5	CTCCAACCGACCAGCAGGT	Non small cell carcinoma
PDPR_c.1774A>G_p.T592A	PDPR_c.1774A>G_p.T592A_6	TCTCCAACCGACCAGCAGG	Non small cell carcinoma
PDPR_c.1774A>G_p.T592A	PDPR_c.1774A>G_p.T592A_3	CCAACCGACCAGCAGGTCC	Non small cell carcinoma
PDPR_c.1774A>G_p.T592A	PDPR_c.1774A>G_p.T592A_4	TCCAACCGACCAGCAGGTC	Non small cell carcinoma
GSE1_c.643A>G_p.T215A	GSE1_c.643A>G_p.T215A_3	GTGACCGAGGACTACCTGA	BRCA_HER-positive carcinoma
GSE1_c.643A>G_p.T215A	GSE1_c.643A>G_p.T215A_4	CGTGACCGAGGACTACCTG	BRCA_HER-positive carcinoma
GSE1_c.643A>G_p.T215A	GSE1_c.643A>G_p.T215A_5	CCGTGACCGAGGACTACCT	BRCA_HER-positive carcinoma
GSE1_c.643A>G_p.T215A	GSE1_c.643A>G_p.T215A_2	TGACCGAGGACTACCTGAG	BRCA_HER-positive carcinoma
GSE1_c.643A>G_p.T215A	GSE1_c.643A>G_p.T215A_6	ACCGTGACCGAGGACTACC	BRCA_HER-positive carcinoma
MYH4_c.1454A>G_p.N485S	MYH4_c.1454A>G_p.N485S_3	CCAACGAGAAACTGCAACA	BRCA_HER-positive carcinoma
MYH4_c.1454A>G_p.N485S	MYH4_c.1454A>G_p.N485S_4	ACCAACGAGAAACTGCAAC	BRCA_HER-positive carcinoma
MYH4_c.1454A>G_p.N485S	MYH4_c.1454A>G_p.N485S_5	CACCAACGAGAAACTGCAA	BRCA_HER-positive carcinoma
MYH4_c.1454A>G_p.N485S	MYH4_c.1454A>G_p.N485S_2	CAACGAGAAACTGCAACAG	BRCA_HER-positive carcinoma
MYH4_c.1454A>G_p.N485S	MYH4_c.1454A>G_p.N485S_6	TCACCAACGAGAAACTGCA	BRCA_HER-positive carcinoma
MYH1_c.1871T>C_p.F624S	MYH1_c.1871T>C_p.F624S_3	ACAAAGAGGAGAGCCAGAG	Hepatocellular carcinoma
MYH1_c.1871T>C_p.F624S	MYH1_c.1871T>C_p.F624S_4	AACAAAGAGGAGAGCCAGA	Hepatocellular carcinoma
MYH1_c.1871T>C_p.F624S	MYH1_c.1871T>C_p.F624S_2	CAAAGAGGAGAGCCAGAGT	Hepatocellular carcinoma
MYH1_c.1871T>C_p.F624S	MYH1_c.1871T>C_p.F624S_5	CAACAAAGAGGAGAGCCAG	Hepatocellular carcinoma
MYH1_c.1871T>C_p.F624S	MYH1_c.1871T>C_p.F624S_6	CCAACAAAGAGGAGAGCCA	Hepatocellular carcinoma
LRRC75A_c.598T>C_p.W200R	LRRC75A_c.598T>C_p.W200R_4	TGCCATTGAGTGCCAGTGT	Hepatocellular carcinoma
LRRC75A_c.598T>C_p.W200R	LRRC75A_c.598T>C_p.W200R_5	TTGCCATTGAGTGCCAGTG	Hepatocellular carcinoma
LRRC75A_c.598T>C_p.W200R	LRRC75A_c.598T>C_p.W200R_2	CCATTGAGTGCCAGTGTGG	Hepatocellular carcinoma
LRRC75A_c.598T>C_p.W200R	LRRC75A_c.598T>C_p.W200R_3	GCCATTGAGTGCCAGTGTG	Hepatocellular carcinoma
LRRC75A_c.598T>C_p.W200R	LRRC75A_c.598T>C_p.W200R_6	GTTGCCATTGAGTGCCAGT	Hepatocellular carcinoma
FLII_c.2230A>G_p.N744D	FLII_c.2230A>G_p.N744D_2	TCAACTACAAGCTCTCCGT	Small cell carcinoma
FLII_c.2230A>G_p.N744D	FLII_c.2230A>G_p.N744D_3	ATCAACTACAAGCTCTCCG	Small cell carcinoma
FLII_c.2230A>G_p.N744D	FLII_c.2230A>G_p.N744D_4	GATCAACTACAAGCTCTCC	Small cell carcinoma
FLII_c.2230A>G_p.N744D	FLII_c.2230A>G_p.N744D_5	AGATCAACTACAAGCTCTC	Small cell carcinoma
FLII_c.2230A>G_p.N744D	FLII_c.2230A>G_p.N744D_6	CAGATCAACTACAAGCTCT	Small cell carcinoma
MYO18A_c.5147T>C_p.L1716P	MYO18A_c.5147T>C_p.L1716P_2	GCAGGTCTTCGATCTCCAC	BRCA_HER-positive carcinoma
MYO18A_c.5147T>C_p.L1716P	MYO18A_c.5147T>C_p.L1716P_3	TGCAGGTCTTCGATCTCCA	BRCA_HER-positive carcinoma
MYO18A_c.5147T>C_p.L1716P	MYO18A_c.5147T>C_p.L1716P_4	GTGCAGGTCTTCGATCTCC	BRCA_HER-positive carcinoma
MYO18A_c.5147T>C_p.L1716P	MYO18A_c.5147T>C_p.L1716P_5	GGTGCAGGTCTTCGATCTC	BRCA_HER-positive carcinoma
MYO18A_c.5147T>C_p.L1716P	MYO18A_c.5147T>C_p.L1716P_6	AGGTGCAGGTCTTCGATCT	BRCA_HER-positive carcinoma
CCT6B_c.130A>G_p.M44V	CCT6B_c.130A>G_p.M44V_3	ACCATGAAAATGTGAGACA	Hepatocellular carcinoma
CCT6B_c.130A>G_p.M44V	CCT6B_c.130A>G_p.M44V_2	CCATGAAAATGTGAGACAG	Hepatocellular carcinoma
CCT6B_c.130A>G_p.M44V	CCT6B_c.130A>G_p.M44V_4	CACCATGAAAATGTGAGAC	Hepatocellular carcinoma
CCT6B_c.130A>G_p.M44V	CCT6B_c.130A>G_p.M44V_5	GCACCATGAAAATGTGAGA	Hepatocellular carcinoma
CCT6B_c.130A>G_p.M44V	CCT6B_c.130A>G_p.M44V_6	GGCACCATGAAAATGTGAG	Hepatocellular carcinoma
ERBB2_c.2264T>C, c.2174T>C_p.L755S, p.L725S	ERBB2_c.2264T>C, c.2174T>C_p.L755S, p.L725S_2	TCAACACTTTGATGGCCAC	BRCA_Lobular carcinoma, BRCA_Basal (triple-negative) carcinoma, BRCA_HER-positive carcinoma
ERBB2_c.2264T>C, c.2174T>C_p.L755S, p.L725S	ERBB2_c.2264T>C, c.2174T>C_p.L755S, p.L725S_3	CTCAACACTTTGATGGCCA	BRCA_Lobular carcinoma, BRCA_Basal (triple-negative) carcinoma, BRCA_HER-positive carcinoma
ERBB2_c.2264T>C, c.2174T>C_p.L755S, p.L725S	ERBB2_c.2264T>C, c.2174T>C_p.L755S, p.L725S_4	CCTCAACACTTTGATGGCC	BRCA_Lobular carcinoma, BRCA_Basal (triple-negative) carcinoma, BRCA_HER-positive carcinoma
ERBB2_c.2264T>C, c.2174T>C_p.L755S, p.L725S	ERBB2_c.2264T>C, c.2174T>C_p.L755S, p.L725S_5	CCCTCAACACTTTGATGGC	BRCA_Lobular carcinoma, BRCA_Basal (triple-negative) carcinoma, BRCA_HER-positive carcinoma
ERBB2_c.2264T>C, c.2174T>C_p.L755S, p.L725S	ERBB2_c.2264T>C, c.2174T>C_p.L755S, p.L725S_6	TCCCTCAACACTTTGATGG	BRCA_Lobular carcinoma, BRCA_Basal (triple-negative) carcinoma, BRCA_HER-positive carcinoma
KRT26_c.703A>G_p.T235A	KRT26_c.703A>G_p.T235A_6	CAATATACAGCTGGGGGGA	Hepatocellular carcinoma
KRT26_c.703A>G_p.T235A	KRT26_c.703A>G_p.T235A_2	ATACAGCTGGGGGGAACGT	Hepatocellular carcinoma
KRT26_c.703A>G_p.T235A	KRT26_c.703A>G_p.T235A_3	TATACAGCTGGGGGGAACG	Hepatocellular carcinoma
KRT26_c.703A>G_p.T235A	KRT26_c.703A>G_p.T235A_4	ATATACAGCTGGGGGGAAC	Hepatocellular carcinoma
KRT26_c.703A>G_p.T235A	KRT26_c.703A>G_p.T235A_5	AATATACAGCTGGGGGGAA	Hepatocellular carcinoma
KLHL10_c.1294T>C_p.Y432H	KLHL10_c.1294T>C_p.Y432H_2	ATAAAGTGTTGTGGCGCTT	Hepatocellular carcinoma
KLHL10_c.1294T>C_p.Y432H	KLHL10_c.1294T>C_p.Y432H_3	CATAAAGTGTTGTGGCGCT	Hepatocellular carcinoma
KLHL10_c.1294T>C_p.Y432H	KLHL10_c.1294T>C_p.Y432H_4	CCATAAAGTGTTGTGGCGC	Hepatocellular carcinoma
KLHL10_c.1294T>C_p.Y432H	KLHL10_c.1294T>C_p.Y432H_5	CCCATAAAGTGTTGTGGCG	Hepatocellular carcinoma
KLHL10_c.1294T>C_p.Y432H	KLHL10_c.1294T>C_p.Y432H_6	TCCCATAAAGTGTTGTGGC	Hepatocellular carcinoma
KAT2A_c.2069A>G_p.Y690C	KAT2A_c.2069A>G_p.Y690C_2	CTACCCGGGGCTCAGCTGC	Hepatocellular carcinoma
KAT2A_c.2069A>G_p.Y690C	KAT2A_c.2069A>G_p.Y690C_3	TCTACCCGGGGCTCAGCTG	Hepatocellular carcinoma
KAT2A_c.2069A>G_p.Y690C	KAT2A_c.2069A>G_p.Y690C_4	GTCTACCCGGGGCTCAGCT	Hepatocellular carcinoma
KAT2A_c.2069A>G_p.Y690C	KAT2A_c.2069A>G_p.Y690C_5	GGTCTACCCGGGGCTCAGC	Hepatocellular carcinoma
KAT2A_c.2069A>G_p.Y690C	KAT2A_c.2069A>G_p.Y690C_6	AGGTCTACCCGGGGCTCAG	Hepatocellular carcinoma
BRCA1_c.926A>G_p.Q309R	BRCA1_c.926A>G_p.Q309R_4	AAGCAGAAACTGCCATGCT	BRCA_Ductal carcinoma
BRCA1_c.926A>G_p.Q309R	BRCA1_c.926A>G_p.Q309R_5	TAAGCAGAAACTGCCATGC	BRCA_Ductal carcinoma
BRCA1_c.926A>G_p.Q309R	BRCA1_c.926A>G_p.Q309R_2	GCAGAAACTGCCATGCTCA	BRCA_Ductal carcinoma
BRCA1_c.926A>G_p.Q309R	BRCA1_c.926A>G_p.Q309R_3	AGCAGAAACTGCCATGCTC	BRCA_Ductal carcinoma
BRCA1_c.926A>G_p.Q309R	BRCA1_c.926A>G_p.Q309R_6	ATAAGCAGAAACTGCCATG	BRCA_Ductal carcinoma
CDC27_c.1477A>G_p.I493V	CDC27_c.1477A>G_p.I493V_2	ATATTTTGAGCCATCTACC	Non small cell carcinoma
CDC27_c.1477A>G_p.I493V	CDC27_c.1477A>G_p.I493V_3	AATATTTTGAGCCATCTAC	Non small cell carcinoma
CDC27_c.1477A>G_p.I493V	CDC27_c.1477A>G_p.I493V_4	AAATATTTTGAGCCATCTA	Non small cell carcinoma
CDC27_c.1477A>G_p.I493V	CDC27_c.1477A>G_p.I493V_5	TAAATATTTTGAGCCATCT	Non small cell carcinoma
CDC27_c.1477A>G_p.I493V	CDC27_c.1477A>G_p.I493V_6	ATAAATATTTTGAGCCATC	Non small cell carcinoma
PSMB6_c.623T>C_p.I208T	PSMB6_c.623T>C_p.I208T_2	GGATCACTCCTCCACTGGA	BRCA_HER-positive carcinoma
PSMB6_c.623T>C_p.I208T	PSMB6_c.623T>C_p.I208T_3	CGGATCACTCCTCCACTGG	BRCA_HER-positive carcinoma
PSMB6_c.623T>C_p.I208T	PSMB6_c.623T>C_p.I208T_4	GCGGATCACTCCTCCACTG	BRCA_HER-positive carcinoma
PSMB6_c.623T>C_p.I208T	PSMB6_c.623T>C_p.I208T_5	GGCGGATCACTCCTCCACT	BRCA_HER-positive carcinoma
PSMB6_c.623T>C_p.I208T	PSMB6_c.623T>C_p.I208T_6	AGGCGGATCACTCCTCCAC	BRCA_HER-positive carcinoma
CACNA1G_c.1481T>C_p.L494P	CACNA1G_c.1481T>C_p.L494P_3	ACCAGGTGGTGGACGGATA	Hepatocellular carcinoma
CACNA1G_c.1481T>C_p.L494P	CACNA1G_c.1481T>C_p.L494P_2	CCAGGTGGTGGACGGATAG	Hepatocellular carcinoma
CACNA1G_c.1481T>C_p.L494P	CACNA1G_c.1481T>C_p.L494P_4	CACCAGGTGGTGGACGGAT	Hepatocellular carcinoma
CACNA1G_c.1481T>C_p.L494P	CACNA1G_c.1481T>C_p.L494P_5	GCACCAGGTGGTGGACGGA	Hepatocellular carcinoma
CACNA1G_c.1481T>C_p.L494P	CACNA1G_c.1481T>C_p.L494P_6	TGCACCAGGTGGTGGACGG	Hepatocellular carcinoma
TOB1_c.209A>G_p.Q70R	TOB1_c.209A>G_p.Q70R_2	ACAAGCATCCAAAGAGAGT	Hepatocellular carcinoma
TOB1_c.209A>G_p.Q70R	TOB1_c.209A>G_p.Q70R_3	AACAAGCATCCAAAGAGAG	Hepatocellular carcinoma
TOB1_c.209A>G_p.Q70R	TOB1_c.209A>G_p.Q70R_4	GAACAAGCATCCAAAGAGA	Hepatocellular carcinoma
TOB1_c.209A>G_p.Q70R	TOB1_c.209A>G_p.Q70R_5	TGAACAAGCATCCAAAGAG	Hepatocellular carcinoma
TOB1_c.209A>G_p.Q70R	TOB1_c.209A>G_p.Q70R_6	TTGAACAAGCATCCAAAGA	Hepatocellular carcinoma
VEZF1_c.659A>G_p.H220R	VEZF1_c.659A>G_p.H220R_6	CTTACCATGTGAGGTCTCA	Small cell carcinoma
VEZF1_c.659A>G_p.H220R	VEZF1_c.659A>G_p.H220R_2	CCATGTGAGGTCTCATGAA	Small cell carcinoma
VEZF1_c.659A>G_p.H220R	VEZF1_c.659A>G_p.H220R_3	ACCATGTGAGGTCTCATGA	Small cell carcinoma
VEZF1_c.659A>G_p.H220R	VEZF1_c.659A>G_p.H220R_4	TACCATGTGAGGTCTCATG	Small cell carcinoma
VEZF1_c.659A>G_p.H220R	VEZF1_c.659A>G_p.H220R_5	TTACCATGTGAGGTCTCAT	Small cell carcinoma
PPM1E_c.133T>C_p.S45P	PPM1E_c.133T>C_p.S45P_2	GGACTCGGGTTCGGGTTCG	Non small cell carcinoma
PPM1E_c.133T>C_p.S45P	PPM1E_c.133T>C_p.S45P_3	CGGACTCGGGTTCGGGTTC	Non small cell carcinoma
PPM1E_c.133T>C_p.S45P	PPM1E_c.133T>C_p.S45P_4	TCGGACTCGGGTTCGGGTT	Non small cell carcinoma
PPM1E_c.133T>C_p.S45P	PPM1E_c.133T>C_p.S45P_5	CTCGGACTCGGGTTCGGGT	Non small cell carcinoma
PPM1E_c.133T>C_p.S45P	PPM1E_c.133T>C_p.S45P_6	GCTCGGACTCGGGTTCGGG	Non small cell carcinoma
KIAA0753_c.2837T>C_p.L946P	KIAA0753_c.2837T>C_p.L946P_2	GAAGTTCAGCAGCCACAGC	Hepatocellular carcinoma
KIAA0753_c.2837T>C_p.L946P	KIAA0753_c.2837T>C_p.L946P_3	TGAAGTTCAGCAGCCACAG	Hepatocellular carcinoma
KIAA0753_c.2837T>C_p.L946P	KIAA0753_c.2837T>C_p.L946P_4	CTGAAGTTCAGCAGCCACA	Hepatocellular carcinoma
KIAA0753_c.2837T>C_p.L946P	KIAA0753_c.2837T>C_p.L946P_5	CCTGAAGTTCAGCAGCCAC	Hepatocellular carcinoma
KIAA0753_c.2837T>C_p.L946P	KIAA0753_c.2837T>C_p.L946P_6	TCCTGAAGTTCAGCAGCCA	Hepatocellular carcinoma
MAP2K6_c.334A>G_p.T112A	MAP2K6_c.334A>G_p.T112A_5	CATTCACTGTCACCTTTTA	Hepatocellular carcinoma
MAP2K6_c.334A>G_p.T112A	MAP2K6_c.334A>G_p.T112A_6	CCATTCACTGTCACCTTTT	Hepatocellular carcinoma
MAP2K6_c.334A>G_p.T112A	MAP2K6_c.334A>G_p.T112A_2	TCACTGTCACCTTTTATGG	Hepatocellular carcinoma
MAP2K6_c.334A>G_p.T112A	MAP2K6_c.334A>G_p.T112A_3	TTCACTGTCACCTTTTATG	Hepatocellular carcinoma
MAP2K6_c.334A>G_p.T112A	MAP2K6_c.334A>G_p.T112A_4	ATTCACTGTCACCTTTTAT	Hepatocellular carcinoma
SDK2_c.2158A>G_p.N720D	SDK2_c.2158A>G_p.N720D_3	CAGAATGGAATTCTCAAGG	BRCA_HER-positive carcinoma
SDK2_c.2158A>G_p.N720D	SDK2_c.2158A>G_p.N720D_4	CCAGAATGGAATTCTCAAG	BRCA_HER-positive carcinoma
SDK2_c.2158A>G_p.N720D	SDK2_c.2158A>G_p.N720D_5	ACCAGAATGGAATTCTCAA	BRCA_HER-positive carcinoma
SDK2_c.2158A>G_p.N720D	SDK2_c.2158A>G_p.N720D_2	AGAATGGAATTCTCAAGGG	BRCA_HER-positive carcinoma
SDK2_c.2158A>G_p.N720D	SDK2_c.2158A>G_p.N720D_6	CACCAGAATGGAATTCTCA	BRCA_HER-positive carcinoma
KIF19_c.367A>G_p.I123V	KIF19_c.367A>G_p.I123V_2	GCATCTATGTTCAGACCCT	Small cell carcinoma
KIF19_c.367A>G_p.I123V	KIF19_c.367A>G_p.I123V_3	GGCATCTATGTTCAGACCC	Small cell carcinoma
KIF19_c.367A>G_p.I123V	KIF19_c.367A>G_p.I123V_4	TGGCATCTATGTTCAGACC	Small cell carcinoma
KIF19_c.367A>G_p.I123V	KIF19_c.367A>G_p.I123V_5	CTGGCATCTATGTTCAGAC	Small cell carcinoma
KIF19_c.367A>G_p.I123V	KIF19_c.367A>G_p.I123V_6	CCTGGCATCTATGTTCAGA	Small cell carcinoma
KIF19_c.2084A>G_p.N695S	KIF19_c.2084A>G_p.N695S_2	GAACAGCGCCCTCCCTCCC	Small cell carcinoma
KIF19_c.2084A>G_p.N695S	KIF19_c.2084A>G_p.N695S_3	AGAACAGCGCCCTCCCTCC	Small cell carcinoma
KIF19_c.2084A>G_p.N695S	KIF19_c.2084A>G_p.N695S_5	GCAGAACAGCGCCCTCCCT	Small cell carcinoma
KIF19_c.2084A>G_p.N695S	KIF19_c.2084A>G_p.N695S_6	TGCAGAACAGCGCCCTCCC	Small cell carcinoma
KIF19_c.2084A>G_p.N695S	KIF19_c.2084A>G_p.N695S_4	CAGAACAGCGCCCTCCCTC	Small cell carcinoma
ZACN_c.880A>G_p.I294V	ZACN_c.880A>G_p.I294V_2	TCAGTAAGCCCTGCTCCCT	BRCA_HER-positive carcinoma
ZACN_c.880A>G_p.I294V	ZACN_c.880A>G_p.I294V_3	CTCAGTAAGCCCTGCTCCC	BRCA_HER-positive carcinoma
ZACN_c.880A>G_p.I294V	ZACN_c.880A>G_p.I294V_5	TGCTCAGTAAGCCCTGCTC	BRCA_HER-positive carcinoma
ZACN_c.880A>G_p.I294V	ZACN_c.880A>G_p.I294V_6	CTGCTCAGTAAGCCCTGCT	BRCA_HER-positive carcinoma
ZACN_c.880A>G_p.I294V	ZACN_c.880A>G_p.I294V_4	GCTCAGTAAGCCCTGCTCC	BRCA_HER-positive carcinoma
TP53_c.854A>G_p.E285G	TP53_c.854A>G_p.E285G_2	AGAGGAAGAGAATCTCCGC	Non small cell carcinoma
TP53_c.854A>G_p.E285G	TP53_c.854A>G_p.E285G_3	CAGAGGAAGAGAATCTCCG	Non small cell carcinoma
TP53_c.854A>G_p.E285G	TP53_c.854A>G_p.E285G_4	ACAGAGGAAGAGAATCTCC	Non small cell carcinoma
TP53_c.854A>G_p.E285G	TP53_c.854A>G_p.E285G_5	CACAGAGGAAGAGAATCTC	Non small cell carcinoma
TP53_c.854A>G_p.E285G	TP53_c.854A>G_p.E285G_6	GCACAGAGGAAGAGAATCT	Non small cell carcinoma
TP53_c.725A>G_p.D242G	TP53_c.725A>G_p.D242G_3	GAGACCGGCGCACAGAGGA	BRCA_HER-positive carcinoma
TP53_c.725A>G_p.D242G	TP53_c.725A>G_p.D242G_4	AGAGACCGGCGCACAGAGG	BRCA_HER-positive carcinoma
TP53_c.725A>G_p.D242G	TP53_c.725A>G_p.D242G_5	GAGAGACCGGCGCACAGAG	BRCA_HER-positive carcinoma
TP53_c.725A>G_p.D242G	TP53_c.725A>G_p.D242G_6	GGAGAGACCGGCGCACAGA	BRCA_HER-positive carcinoma
TP53_c.725A>G_p.D242G	TP53_c.725A>G_p.D242G_2	AGACCGGCGCACAGAGGAA	BRCA_HER-positive carcinoma
TP53_c.721A>G, c.838A>G_p.R241G, p.R280G	TP53_c.721A>G, c.838A>G_p.R241G, p.R280G_3	GGGAGAGACCGGCGCACAG	Hepatocellular carcinoma, BRCA_Basal (triple-negative) carcinoma
TP53_c.721A>G, c.838A>G_p.R241G, p.R280G	TP53_c.721A>G, c.838A>G_p.R241G, p.R280G_4	TGGGAGAGACCGGCGCACA	Hepatocellular carcinoma, BRCA_Basal (triple-negative) carcinoma
TP53_c.721A>G, c.838A>G_p.R241G, p.R280G	TP53_c.721A>G, c.838A>G_p.R241G, p.R280G_5	CTGGGAGAGACCGGCGCAC	Hepatocellular carcinoma, BRCA_Basal (triple-negative) carcinoma
TP53_c.721A>G, c.838A>G_p.R241G, p.R280G	TP53_c.721A>G, c.838A>G_p.R241G, p.R280G_2	GGAGAGACCGGCGCACAGA	Hepatocellular carcinoma, BRCA_Basal (triple-negative) carcinoma
TP53_c.721A>G, c.838A>G_p.R241G, p.R280G	TP53_c.721A>G, c.838A>G_p.R241G, p.R280G_6	CCTGGGAGAGACCGGCGCA	Hepatocellular carcinoma, BRCA_Basal (triple-negative) carcinoma
TP53_c.823T>C, c.706T>C_p.C275R, p.C236R	TP53_c.823T>C, c.706T>C_p.C275R, p.C236R_5	GGCACAAACACGCACCTCA	Hepatocellular carcinoma, BRCA_Basal (triple-negative) carcinoma
TP53_c.823T>C, c.706T>C_p.C275R, p.C236R	TP53_c.823T>C, c.706T>C_p.C275R, p.C236R_6	AGGCACAAACACGCACCTC	Hepatocellular carcinoma, BRCA_Basal (triple-negative) carcinoma
TP53_c.823T>C, c.706T>C_p.C275R, p.C236R	TP53_c.823T>C, c.706T>C_p.C275R, p.C236R_2	ACAAACACGCACCTCAAAG	Hepatocellular carcinoma, BRCA_Basal (triple-negative) carcinoma
TP53_c.823T>C, c.706T>C_p.C275R, p.C236R	TP53_c.823T>C, c.706T>C_p.C275R, p.C236R_3	CACAAACACGCACCTCAAA	Hepatocellular carcinoma, BRCA_Basal (triple-negative) carcinoma
TP53_c.823T>C, c.706T>C_p.C275R, p.C236R	TP53_c.823T>C, c.706T>C_p.C275R, p.C236R_4	GCACAAACACGCACCTCAA	Hepatocellular carcinoma, BRCA_Basal (triple-negative) carcinoma
TP53_c.821T>C_p.V274A	TP53_c.821T>C_p.V274A_2	AAACACGCACCTCAAAGCT	Hepatocellular carcinoma
TP53_c.821T>C_p.V274A	TP53_c.821T>C_p.V274A_3	CAAACACGCACCTCAAAGC	Hepatocellular carcinoma
TP53_c.821T>C_p.V274A	TP53_c.821T>C_p.V274A_4	ACAAACACGCACCTCAAAG	Hepatocellular carcinoma
TP53_c.821T>C_p.V274A	TP53_c.821T>C_p.V274A_5	CACAAACACGCACCTCAAA	Hepatocellular carcinoma
TP53_c.821T>C_p.V274A	TP53_c.821T>C_p.V274A_6	GCACAAACACGCACCTCAA	Hepatocellular carcinoma
TP53_c.773A>G_p.E258G	TP53_c.773A>G_p.E258G_2	GGAAGACTCCAGGTCAGGA	Hepatocellular carcinoma
TP53_c.773A>G_p.E258G	TP53_c.773A>G_p.E258G_3	TGGAAGACTCCAGGTCAGG	Hepatocellular carcinoma
TP53_c.773A>G_p.E258G	TP53_c.773A>G_p.E258G_4	CTGGAAGACTCCAGGTCAG	Hepatocellular carcinoma
TP53_c.773A>G_p.E258G	TP53_c.773A>G_p.E258G_5	ACTGGAAGACTCCAGGTCA	Hepatocellular carcinoma
TP53_c.773A>G_p.E258G	TP53_c.773A>G_p.E258G_6	CACTGGAAGACTCCAGGTC	Hepatocellular carcinoma
TP53_c.755T>C_p.L252P	TP53_c.755T>C_p.L252P_4	GGTGAGGATGGGCCTCCGG	Non small cell carcinoma
TP53_c.755T>C_p.L252P	TP53_c.755T>C_p.L252P_2	TGAGGATGGGCCTCCGGTT	Non small cell carcinoma
TP53_c.755T>C_p.L252P	TP53_c.755T>C_p.L252P_3	GTGAGGATGGGCCTCCGGT	Non small cell carcinoma
TP53_c.755T>C_p.L252P	TP53_c.755T>C_p.L252P_5	TGGTGAGGATGGGCCTCCG	Non small cell carcinoma
TP53_c.755T>C_p.L252P	TP53_c.755T>C_p.L252P_6	ATGGTGAGGATGGGCCTCC	Non small cell carcinoma
TP53_c.745A>G_p.R249G	TP53_c.745A>G_p.R249G_2	GGAGGCCCATCCTCACCAT	Hepatocellular carcinoma
TP53_c.745A>G_p.R249G	TP53_c.745A>G_p.R249G_3	CGGAGGCCCATCCTCACCA	Hepatocellular carcinoma
TP53_c.745A>G_p.R249G	TP53_c.745A>G_p.R249G_4	CCGGAGGCCCATCCTCACC	Hepatocellular carcinoma
TP53_c.745A>G_p.R249G	TP53_c.745A>G_p.R249G_5	ACCGGAGGCCCATCCTCAC	Hepatocellular carcinoma
TP53_c.745A>G_p.R249G	TP53_c.745A>G_p.R249G_6	AACCGGAGGCCCATCCTCA	Hepatocellular carcinoma
TP53_c.740A>G_p.N247S	TP53_c.740A>G_p.N247S_2	GAACCGGAGGCCCATCCTC	Non small cell carcinoma
TP53_c.740A>G_p.N247S	TP53_c.740A>G_p.N247S_6	GCATGAACCGGAGGCCCAT	Non small cell carcinoma
TP53_c.740A>G_p.N247S	TP53_c.740A>G_p.N247S_3	TGAACCGGAGGCCCATCCT	Non small cell carcinoma
TP53_c.740A>G_p.N247S	TP53_c.740A>G_p.N247S_4	ATGAACCGGAGGCCCATCC	Non small cell carcinoma
TP53_c.740A>G_p.N247S	TP53_c.740A>G_p.N247S_5	CATGAACCGGAGGCCCATC	Non small cell carcinoma
TP53_c.737T>C_p.M246T	TP53_c.737T>C_p.M246T_2	TCATGCCGCCCATGCAGGA	Hepatocellular carcinoma
TP53_c.737T>C_p.M246T	TP53_c.737T>C_p.M246T_3	TTCATGCCGCCCATGCAGG	Hepatocellular carcinoma
TP53_c.737T>C_p.M246T	TP53_c.737T>C_p.M246T_4	GTTCATGCCGCCCATGCAG	Hepatocellular carcinoma
TP53_c.737T>C_p.M246T	TP53_c.737T>C_p.M246T_5	GGTTCATGCCGCCCATGCA	Hepatocellular carcinoma
TP53_c.737T>C_p.M246T	TP53_c.737T>C_p.M246T_6	CGGTTCATGCCGCCCATGC	Hepatocellular carcinoma
TP53_c.736A>G_p.M246V	TP53_c.736A>G_p.M246V_2	GCATGAACCGGAGGCCCAT	Hepatocellular carcinoma
TP53_c.736A>G_p.M246V	TP53_c.736A>G_p.M246V_3	GGCATGAACCGGAGGCCCA	Hepatocellular carcinoma
TP53_c.736A>G_p.M246V	TP53_c.736A>G_p.M246V_4	CGGCATGAACCGGAGGCCC	Hepatocellular carcinoma
TP53_c.736A>G_p.M246V	TP53_c.736A>G_p.M246V_5	GCGGCATGAACCGGAGGCC	Hepatocellular carcinoma
TP53_c.736A>G_p.M246V	TP53_c.736A>G_p.M246V_6	GGCGGCATGAACCGGAGGC	Hepatocellular carcinoma
TP53_c.712T>C_p.C238R	TP53_c.712T>C_p.C238R_5	GTTACACATGTAGTTGTAG	Hepatocellular carcinoma
TP53_c.712T>C_p.C238R	TP53_c.712T>C_p.C238R_6	TGTTACACATGTAGTTGTA	Hepatocellular carcinoma
TP53_c.712T>C_p.C238R	TP53_c.712T>C_p.C238R_2	ACACATGTAGTTGTAGTGG	Hepatocellular carcinoma
TP53_c.712T>C_p.C238R	TP53_c.712T>C_p.C238R_3	TACACATGTAGTTGTAGTG	Hepatocellular carcinoma
TP53_c.712T>C_p.C238R	TP53_c.712T>C_p.C238R_4	TTACACATGTAGTTGTAGT	Hepatocellular carcinoma
TP53_c.707A>G, c.590A>G_p.Y236C, p.Y197C	TP53_c.707A>G, c.590A>G_p.Y236C, p.Y197C_2	CTACATGTGTAACAGTTCC	Small cell carcinoma, Non small cell carcinoma, Hepatocellular carcinoma, BRCA_Ductal carcinoma, BRCA_Basal (triple-negative) carcinoma
TP53_c.707A>G, c.590A>G_p.Y236C, p.Y197C	TP53_c.707A>G, c.590A>G_p.Y236C, p.Y197C_3	ACTACATGTGTAACAGTTC	Small cell carcinoma, Non small cell carcinoma, Hepatocellular carcinoma, BRCA_Ductal carcinoma, BRCA_Basal (triple-negative) carcinoma
TP53_c.707A>G, c.590A>G_p.Y236C, p.Y197C	TP53_c.707A>G, c.590A>G_p.Y236C, p.Y197C_4	AACTACATGTGTAACAGTT	Small cell carcinoma, Non small cell carcinoma, Hepatocellular carcinoma, BRCA_Ductal carcinoma, BRCA_Basal (triple-negative) carcinoma
TP53_c.707A>G, c.590A>G_p.Y236C, p.Y197C	TP53_c.707A>G, c.590A>G_p.Y236C, p.Y197C_5	CAACTACATGTGTAACAGT	Small cell carcinoma, Non small cell carcinoma, Hepatocellular carcinoma, BRCA_Ductal carcinoma, BRCA_Basal (triple-negative) carcinoma
TP53_c.707A>G, c.590A>G_p.Y236C, p.Y197C	TP53_c.707A>G, c.590A>G_p.Y236C, p.Y197C_6	ACAACTACATGTGTAACAG	Small cell carcinoma, Non small cell carcinoma, Hepatocellular carcinoma, BRCA_Ductal carcinoma, BRCA_Basal (triple-negative) carcinoma
TP53_c.701A>G, c.584A>G_p.Y234C, p.Y195C	TP53_c.701A>G, c.584A>G_p.Y234C, p.Y195C_2	CTACAACTACATGTGTAAC	Small cell carcinoma, Non small cell carcinoma, Hepatocellular carcinoma, BRCA_Basal (triple-negative) carcinoma
TP53_c.701A>G, c.584A>G_p.Y234C, p.Y195C	TP53_c.701A>G, c.584A>G_p.Y234C, p.Y195C_3	ACTACAACTACATGTGTAA	Small cell carcinoma, Non small cell carcinoma, Hepatocellular carcinoma, BRCA_Basal (triple-negative) carcinoma
TP53_c.701A>G, c.584A>G_p.Y234C, p.Y195C	TP53_c.701A>G, c.584A>G_p.Y234C, p.Y195C_4	CACTACAACTACATGTGTA	Small cell carcinoma, Non small cell carcinoma, Hepatocellular carcinoma, BRCA_Basal (triple-negative) carcinoma
TP53_c.701A>G, c.584A>G_p.Y234C, p.Y195C	TP53_c.701A>G, c.584A>G_p.Y234C, p.Y195C_5	CCACTACAACTACATGTGT	Small cell carcinoma, Non small cell carcinoma, Hepatocellular carcinoma, BRCA_Basal (triple-negative) carcinoma
TP53_c.701A>G, c.584A>G_p.Y234C, p.Y195C	TP53_c.701A>G, c.584A>G_p.Y234C, p.Y195C_6	TCCACTACAACTACATGTG	Small cell carcinoma, Non small cell carcinoma, Hepatocellular carcinoma, BRCA_Basal (triple-negative) carcinoma
TP53_c.583T>C_p.Y195H	TP53_c.583T>C_p.Y195H_4	TTGTAGTGGATGGTGGTAC	BRCA_Basal (triple-negative) carcinoma
TP53_c.583T>C_p.Y195H	TP53_c.583T>C_p.Y195H_2	GTAGTGGATGGTGGTACAG	BRCA_Basal (triple-negative) carcinoma
TP53_c.583T>C_p.Y195H	TP53_c.583T>C_p.Y195H_3	TGTAGTGGATGGTGGTACA	BRCA_Basal (triple-negative) carcinoma
TP53_c.583T>C_p.Y195H	TP53_c.583T>C_p.Y195H_5	GTTGTAGTGGATGGTGGTA	BRCA_Basal (triple-negative) carcinoma
TP53_c.583T>C_p.Y195H	TP53_c.583T>C_p.Y195H_6	AGTTGTAGTGGATGGTGGT	BRCA_Basal (triple-negative) carcinoma
TP53_c.659A>G, c.542A>G_p.Y220C, p.Y181C	TP53_c.659A>G, c.542A>G_p.Y220C, p.Y181C_2	CTATGAGCCGCCTGAGGTC	CRC_Adenocarcinoma, Small cell carcinoma, Non small cell carcinoma, Hepatocellular carcinoma, BRCA_Ductal carcinoma, BRCA_Basal (triple-negative) carcinoma, BRCA_HER-positive carcinoma
TP53_c.659A>G, c.542A>G_p.Y220C, p.Y181C	TP53_c.659A>G, c.542A>G_p.Y220C, p.Y181C_3	CCTATGAGCCGCCTGAGGT	CRC_Adenocarcinoma, Small cell carcinoma, Non small cell carcinoma, Hepatocellular carcinoma, BRCA_Ductal carcinoma, BRCA_Basal (triple-negative) carcinoma, BRCA_HER-positive carcinoma
TP53_c.659A>G, c.542A>G_p.Y220C, p.Y181C	TP53_c.659A>G, c.542A>G_p.Y220C, p.Y181C_4	CCCTATGAGCCGCCTGAGG	CRC_Adenocarcinoma, Small cell carcinoma, Non small cell carcinoma, Hepatocellular carcinoma, BRCA_Ductal carcinoma, BRCA_Basal (triple-negative) carcinoma, BRCA_HER-positive carcinoma
TP53_c.659A>G, c.542A>G_p.Y220C, p.Y181C	TP53_c.659A>G, c.542A>G_p.Y220C, p.Y181C_5	GCCCTATGAGCCGCCTGAG	CRC_Adenocarcinoma, Small cell carcinoma, Non small cell carcinoma, Hepatocellular carcinoma, BRCA_Ductal carcinoma, BRCA_Basal (triple-negative) carcinoma, BRCA_HER-positive carcinoma
TP53_c.659A>G, c.542A>G_p.Y220C, p.Y181C	TP53_c.659A>G, c.542A>G_p.Y220C, p.Y181C_6	TGCCCTATGAGCCGCCTGA	CRC_Adenocarcinoma, Small cell carcinoma, Non small cell carcinoma, Hepatocellular carcinoma, BRCA_Ductal carcinoma, BRCA_Basal (triple-negative) carcinoma, BRCA_HER-positive carcinoma
TP53_c.643A>G_p.S215G	TP53_c.643A>G_p.S215G_2	ATAGTGTGGTGGTGCCCTA	Non small cell carcinoma
TP53_c.643A>G_p.S215G	TP53_c.643A>G_p.S215G_6	CGACATAGTGTGGTGGTGC	Non small cell carcinoma
TP53_c.643A>G_p.S215G	TP53_c.643A>G_p.S215G_3	CATAGTGTGGTGGTGCCCT	Non small cell carcinoma
TP53_c.643A>G_p.S215G	TP53_c.643A>G_p.S215G_4	ACATAGTGTGGTGGTGCCC	Non small cell carcinoma
TP53_c.643A>G_p.S215G	TP53_c.643A>G_p.S215G_5	GACATAGTGTGGTGGTGCC	Non small cell carcinoma
TP53_c.641A>G, c.524A>G_p.H214R, p.H175R	TP53_c.641A>G, c.524A>G_p.H214R, p.H175R_2	ACATAGTGTGGTGGTGCCC	Small cell carcinoma, Non small cell carcinoma, Hepatocellular carcinoma, BRCA_Basal (triple-negative) carcinoma
TP53_c.641A>G, c.524A>G_p.H214R, p.H175R	TP53_c.641A>G, c.524A>G_p.H214R, p.H175R_3	GACATAGTGTGGTGGTGCC	Small cell carcinoma, Non small cell carcinoma, Hepatocellular carcinoma, BRCA_Basal (triple-negative) carcinoma
TP53_c.641A>G, c.524A>G_p.H214R, p.H175R	TP53_c.641A>G, c.524A>G_p.H214R, p.H175R_4	CGACATAGTGTGGTGGTGC	Small cell carcinoma, Non small cell carcinoma, Hepatocellular carcinoma, BRCA_Basal (triple-negative) carcinoma
TP53_c.641A>G, c.524A>G_p.H214R, p.H175R	TP53_c.641A>G, c.524A>G_p.H214R, p.H175R_5	TCGACATAGTGTGGTGGTG	Small cell carcinoma, Non small cell carcinoma, Hepatocellular carcinoma, BRCA_Basal (triple-negative) carcinoma
TP53_c.641A>G, c.524A>G_p.H214R, p.H175R	TP53_c.641A>G, c.524A>G_p.H214R, p.H175R_6	TTCGACATAGTGTGGTGGT	Small cell carcinoma, Non small cell carcinoma, Hepatocellular carcinoma, BRCA_Basal (triple-negative) carcinoma
TP53_c.614A>G_p.Y205C	TP53_c.614A>G_p.Y205C_2	GTATTTGGATGACAGAAAC	Small cell carcinoma, Hepatocellular carcinoma
TP53_c.614A>G_p.Y205C	TP53_c.614A>G_p.Y205C_3	AGTATTTGGATGACAGAAA	Small cell carcinoma, Hepatocellular carcinoma
TP53_c.614A>G_p.Y205C	TP53_c.614A>G_p.Y205C_4	GAGTATTTGGATGACAGAA	Small cell carcinoma, Hepatocellular carcinoma
TP53_c.614A>G_p.Y205C	TP53_c.614A>G_p.Y205C_5	GGAGTATTTGGATGACAGA	Small cell carcinoma, Hepatocellular carcinoma
TP53_c.614A>G_p.Y205C	TP53_c.614A>G_p.Y205C_6	TGGAGTATTTGGATGACAG	Small cell carcinoma, Hepatocellular carcinoma
TP53_c.467T>C_p.I156T	TP53_c.467T>C_p.I156T_6	ACTCGGATAAGATGCTGAG	BRCA_Ductal carcinoma, BRCA_Basal (triple-negative) carcinoma
TP53_c.467T>C_p.I156T	TP53_c.467T>C_p.I156T_5	CTCGGATAAGATGCTGAGG	BRCA_Ductal carcinoma, BRCA_Basal (triple-negative) carcinoma
TP53_c.467T>C_p.I156T	TP53_c.467T>C_p.I156T_2	GGATAAGATGCTGAGGAGG	BRCA_Ductal carcinoma, BRCA_Basal (triple-negative) carcinoma
TP53_c.467T>C_p.I156T	TP53_c.467T>C_p.I156T_3	CGGATAAGATGCTGAGGAG	BRCA_Ductal carcinoma, BRCA_Basal (triple-negative) carcinoma
TP53_c.467T>C_p.I156T	TP53_c.467T>C_p.I156T_4	TCGGATAAGATGCTGAGGA	BRCA_Ductal carcinoma, BRCA_Basal (triple-negative) carcinoma
TP53_c.578A>G, c.461A>G_p.H193R, p.H154R	TP53_c.578A>G, c.461A>G_p.H193R, p.H154R_3	AGCATCTTATCCGAGTGGA	Small cell carcinoma, Non small cell carcinoma, Hepatocellular carcinoma, BRCA_Basal (triple-negative) carcinoma
TP53_c.578A>G, c.461A>G_p.H193R, p.H154R	TP53_c.578A>G, c.461A>G_p.H193R, p.H154R_4	CAGCATCTTATCCGAGTGG	Small cell carcinoma, Non small cell carcinoma, Hepatocellular carcinoma, BRCA_Basal (triple-negative) carcinoma
TP53_c.578A>G, c.461A>G_p.H193R, p.H154R	TP53_c.578A>G, c.461A>G_p.H193R, p.H154R_5	TCAGCATCTTATCCGAGTG	Small cell carcinoma, Non small cell carcinoma, Hepatocellular carcinoma, BRCA_Basal (triple-negative) carcinoma
TP53_c.578A>G, c.461A>G_p.H193R, p.H154R	TP53_c.578A>G, c.461A>G_p.H193R, p.H154R_6	CTCAGCATCTTATCCGAGT	Small cell carcinoma, Non small cell carcinoma, Hepatocellular carcinoma, BRCA_Basal (triple-negative) carcinoma
TP53_c.578A>G, c.461A>G_p.H193R, p.H154R	TP53_c.578A>G, c.461A>G_p.H193R, p.H154R_2	GCATCTTATCCGAGTGGAA	Small cell carcinoma, Non small cell carcinoma, Hepatocellular carcinoma, BRCA_Basal (triple-negative) carcinoma
TP53_c.536A>G, c.419A>G_p.H179R, p.H140R	TP53_c.536A>G, c.419A>G_p.H179R, p.H140R_3	ACCATGAGCGCTGCTCAGA	CRC_Adenocarcinoma, Small cell carcinoma, Non small cell carcinoma, BRCA_NS, BRCA_Basal (triple-negative) carcinoma
TP53_c.536A>G, c.419A>G_p.H179R, p.H140R	TP53_c.536A>G, c.419A>G_p.H179R, p.H140R_4	CACCATGAGCGCTGCTCAG	CRC_Adenocarcinoma, Small cell carcinoma, Non small cell carcinoma, BRCA_NS, BRCA_Basal (triple-negative) carcinoma
TP53_c.536A>G, c.419A>G_p.H179R, p.H140R	TP53_c.536A>G, c.419A>G_p.H179R, p.H140R_5	CCACCATGAGCGCTGCTCA	CRC_Adenocarcinoma, Small cell carcinoma, Non small cell carcinoma, BRCA_NS, BRCA_Basal (triple-negative) carcinoma
TP53_c.536A>G, c.419A>G_p.H179R, p.H140R	TP53_c.536A>G, c.419A>G_p.H179R, p.H140R_2	CCATGAGCGCTGCTCAGAT	CRC_Adenocarcinoma, Small cell carcinoma, Non small cell carcinoma, BRCA_NS, BRCA_Basal (triple-negative) carcinoma
TP53_c.536A>G, c.419A>G_p.H179R, p.H140R	TP53_c.536A>G, c.419A>G_p.H179R, p.H140R_6	CCCACCATGAGCGCTGCTC	CRC_Adenocarcinoma, Small cell carcinoma, Non small cell carcinoma, BRCA_NS, BRCA_Basal (triple-negative) carcinoma
TP53_c.503A>G_p.H168R	TP53_c.503A>G_p.H168R_2	GCACATGACGGAGGTTGTG	Non small cell carcinoma
TP53_c.503A>G_p.H168R	TP53_c.503A>G_p.H168R_3	AGCACATGACGGAGGTTGT	Non small cell carcinoma
TP53_c.503A>G_p.H168R	TP53_c.503A>G_p.H168R_4	CAGCACATGACGGAGGTTG	Non small cell carcinoma
TP53_c.503A>G_p.H168R	TP53_c.503A>G_p.H168R_6	CACAGCACATGACGGAGGT	Non small cell carcinoma
TP53_c.503A>G_p.H168R	TP53_c.503A>G_p.H168R_5	ACAGCACATGACGGAGGTT	Non small cell carcinoma
TP53_c.488A>G, c.371A>G_p.Y163C, p.Y124C	TP53_c.488A>G, c.371A>G_p.Y163C, p.Y124C_2	CTACAAGCAGTCACAGCAC	CRC_Adenocarcinoma, Non small cell carcinoma, Hepatocellular carcinoma, BRCA_NS, BRCA_HER-positive carcinoma
TP53_c.488A>G, c.371A>G_p.Y163C, p.Y124C	TP53_c.488A>G, c.371A>G_p.Y163C, p.Y124C_3	TCTACAAGCAGTCACAGCA	CRC_Adenocarcinoma, Non small cell carcinoma, Hepatocellular carcinoma, BRCA_NS, BRCA_HER-positive carcinoma
TP53_c.488A>G, c.371A>G_p.Y163C, p.Y124C	TP53_c.488A>G, c.371A>G_p.Y163C, p.Y124C_4	ATCTACAAGCAGTCACAGC	CRC_Adenocarcinoma, Non small cell carcinoma, Hepatocellular carcinoma, BRCA_NS, BRCA_HER-positive carcinoma
TP53_c.488A>G, c.371A>G_p.Y163C, p.Y124C	TP53_c.488A>G, c.371A>G_p.Y163C, p.Y124C_6	CCATCTACAAGCAGTCACA	CRC_Adenocarcinoma, Non small cell carcinoma, Hepatocellular carcinoma, BRCA_NS, BRCA_HER-positive carcinoma
TP53_c.488A>G, c.371A>G_p.Y163C, p.Y124C	TP53_c.488A>G, c.371A>G_p.Y163C, p.Y124C_5	CATCTACAAGCAGTCACAG	CRC_Adenocarcinoma, Non small cell carcinoma, Hepatocellular carcinoma, BRCA_NS, BRCA_HER-positive carcinoma
TP53_c.487T>C_p.Y163H	TP53_c.487T>C_p.Y163H_2	GTAGATGGCCATGGCGCGG	Hepatocellular carcinoma
TP53_c.487T>C_p.Y163H	TP53_c.487T>C_p.Y163H_3	TGTAGATGGCCATGGCGCG	Hepatocellular carcinoma
TP53_c.487T>C_p.Y163H	TP53_c.487T>C_p.Y163H_4	TTGTAGATGGCCATGGCGC	Hepatocellular carcinoma
TP53_c.487T>C_p.Y163H	TP53_c.487T>C_p.Y163H_5	CTTGTAGATGGCCATGGCG	Hepatocellular carcinoma
TP53_c.487T>C_p.Y163H	TP53_c.487T>C_p.Y163H_6	GCTTGTAGATGGCCATGGC	Hepatocellular carcinoma
TP53_c.395A>G_p.K132R	TP53_c.395A>G_p.K132R_2	CAAGATGTTTTGCCAACTG	BRCA_HER-positive carcinoma
TP53_c.395A>G_p.K132R	TP53_c.395A>G_p.K132R_4	AACAAGATGTTTTGCCAAC	BRCA_HER-positive carcinoma
TP53_c.395A>G_p.K132R	TP53_c.395A>G_p.K132R_5	CAACAAGATGTTTTGCCAA	BRCA_HER-positive carcinoma
TP53_c.395A>G_p.K132R	TP53_c.395A>G_p.K132R_6	TCAACAAGATGTTTTGCCA	BRCA_HER-positive carcinoma
TP53_c.395A>G_p.K132R	TP53_c.395A>G_p.K132R_3	ACAAGATGTTTTGCCAACT	BRCA_HER-positive carcinoma
TP53_c.341A>G_p.K114R	TP53_c.341A>G_p.K114R_2	ACAGTACTCCCCTGCCCTC	BRCA_HER-positive carcinoma
TP53_c.341A>G_p.K114R	TP53_c.341A>G_p.K114R_4	CTACAGTACTCCCCTGCCC	BRCA_HER-positive carcinoma
TP53_c.341A>G_p.K114R	TP53_c.341A>G_p.K114R_5	CCTACAGTACTCCCCTGCC	BRCA_HER-positive carcinoma
TP53_c.341A>G_p.K114R	TP53_c.341A>G_p.K114R_6	TCCTACAGTACTCCCCTGC	BRCA_HER-positive carcinoma
TP53_c.341A>G_p.K114R	TP53_c.341A>G_p.K114R_3	TACAGTACTCCCCTGCCCT	BRCA_HER-positive carcinoma
DNAH17_c.10033T>C_p.F3345L	DNAH17_c.10033T>C_p.F3345L_6	TCCTGAAGTTCTCCACAGA	BRCA_HER-positive carcinoma
DNAH17_c.10033T>C_p.F3345L	DNAH17_c.10033T>C_p.F3345L_5	CCTGAAGTTCTCCACAGAC	BRCA_HER-positive carcinoma
DNAH17_c.10033T>C_p.F3345L	DNAH17_c.10033T>C_p.F3345L_2	GAAGTTCTCCACAGACTCA	BRCA_HER-positive carcinoma
DNAH17_c.10033T>C_p.F3345L	DNAH17_c.10033T>C_p.F3345L_3	TGAAGTTCTCCACAGACTC	BRCA_HER-positive carcinoma
DNAH17_c.10033T>C_p.F3345L	DNAH17_c.10033T>C_p.F3345L_4	CTGAAGTTCTCCACAGACT	BRCA_HER-positive carcinoma
TIMP2_c.95T>C_p.V32A	TIMP2_c.95T>C_p.V32A_2	GCACCGGGGAGCAGCTGCA	Small cell carcinoma
TIMP2_c.95T>C_p.V32A	TIMP2_c.95T>C_p.V32A_3	TGCACCGGGGAGCAGCTGC	Small cell carcinoma
TIMP2_c.95T>C_p.V32A	TIMP2_c.95T>C_p.V32A_4	GTGCACCGGGGAGCAGCTG	Small cell carcinoma
TIMP2_c.95T>C_p.V32A	TIMP2_c.95T>C_p.V32A_5	GGTGCACCGGGGAGCAGCT	Small cell carcinoma
TIMP2_c.95T>C_p.V32A	TIMP2_c.95T>C_p.V32A_6	GGGTGCACCGGGGAGCAGC	Small cell carcinoma
CANT1_c.935A>G_p.D312G	CANT1_c.935A>G_p.D312G_2	CGACGAGCGCAAGGGCGCC	Hepatocellular carcinoma
CANT1_c.935A>G_p.D312G	CANT1_c.935A>G_p.D312G_3	ACGACGAGCGCAAGGGCGC	Hepatocellular carcinoma
CANT1_c.935A>G_p.D312G	CANT1_c.935A>G_p.D312G_4	GACGACGAGCGCAAGGGCG	Hepatocellular carcinoma
CANT1_c.935A>G_p.D312G	CANT1_c.935A>G_p.D312G_5	GGACGACGAGCGCAAGGGC	Hepatocellular carcinoma
CANT1_c.935A>G_p.D312G	CANT1_c.935A>G_p.D312G_6	AGGACGACGAGCGCAAGGG	Hepatocellular carcinoma
EIF4A3_c.1086A>G_p.I362M	EIF4A3_c.1086A>G_p.I362M_5	TACATACACAGGTAAGGTG	Hepatocellular carcinoma
EIF4A3_c.1086A>G_p.I362M	EIF4A3_c.1086A>G_p.I362M_2	ATACACAGGTAAGGTGCAA	Hepatocellular carcinoma
EIF4A3_c.1086A>G_p.I362M	EIF4A3_c.1086A>G_p.I362M_3	CATACACAGGTAAGGTGCA	Hepatocellular carcinoma
EIF4A3_c.1086A>G_p.I362M	EIF4A3_c.1086A>G_p.I362M_4	ACATACACAGGTAAGGTGC	Hepatocellular carcinoma
EIF4A3_c.1086A>G_p.I362M	EIF4A3_c.1086A>G_p.I362M_6	GTACATACACAGGTAAGGT	Hepatocellular carcinoma
RNF213_c.14194A>G_p.K4732E	RNF213_c.14194A>G_p.K4732E_2	GGAAAAGTGTGGTCCATTG	BRCA_HER-positive carcinoma
RNF213_c.14194A>G_p.K4732E	RNF213_c.14194A>G_p.K4732E_3	CGGAAAAGTGTGGTCCATT	BRCA_HER-positive carcinoma
RNF213_c.14194A>G_p.K4732E	RNF213_c.14194A>G_p.K4732E_4	CCGGAAAAGTGTGGTCCAT	BRCA_HER-positive carcinoma
RNF213_c.14194A>G_p.K4732E	RNF213_c.14194A>G_p.K4732E_5	CCCGGAAAAGTGTGGTCCA	BRCA_HER-positive carcinoma
RNF213_c.14194A>G_p.K4732E	RNF213_c.14194A>G_p.K4732E_6	CCCCGGAAAAGTGTGGTCC	BRCA_HER-positive carcinoma
RPTOR_c.2897A>G_p.Y966C	RPTOR_c.2897A>G_p.Y966C_2	CTATTTTGCCCAGCCCGTC	Hepatocellular carcinoma
RPTOR_c.2897A>G_p.Y966C	RPTOR_c.2897A>G_p.Y966C_3	GCTATTTTGCCCAGCCCGT	Hepatocellular carcinoma
RPTOR_c.2897A>G_p.Y966C	RPTOR_c.2897A>G_p.Y966C_4	CGCTATTTTGCCCAGCCCG	Hepatocellular carcinoma
RPTOR_c.2897A>G_p.Y966C	RPTOR_c.2897A>G_p.Y966C_5	CCGCTATTTTGCCCAGCCC	Hepatocellular carcinoma
RPTOR_c.2897A>G_p.Y966C	RPTOR_c.2897A>G_p.Y966C_6	CCCGCTATTTTGCCCAGCC	Hepatocellular carcinoma
ALOXE3_c.152A>G_p.Q51R	ALOXE3_c.152A>G_p.Q51R_3	AGCAAACAAGTATTAGAGT	Hepatocellular carcinoma
ALOXE3_c.152A>G_p.Q51R	ALOXE3_c.152A>G_p.Q51R_2	GCAAACAAGTATTAGAGTG	Hepatocellular carcinoma
ALOXE3_c.152A>G_p.Q51R	ALOXE3_c.152A>G_p.Q51R_4	AAGCAAACAAGTATTAGAG	Hepatocellular carcinoma
ALOXE3_c.152A>G_p.Q51R	ALOXE3_c.152A>G_p.Q51R_5	CAAGCAAACAAGTATTAGA	Hepatocellular carcinoma
ALOXE3_c.152A>G_p.Q51R	ALOXE3_c.152A>G_p.Q51R_6	GCAAGCAAACAAGTATTAG	Hepatocellular carcinoma
FASN_c.437T>C_p.F146S	FASN_c.437T>C_p.F146S_2	AGAAGGAGAGCCGGTTGGC	BRCA_HER-positive carcinoma
FASN_c.437T>C_p.F146S	FASN_c.437T>C_p.F146S_3	AAGAAGGAGAGCCGGTTGG	BRCA_HER-positive carcinoma
FASN_c.437T>C_p.F146S	FASN_c.437T>C_p.F146S_4	GAAGAAGGAGAGCCGGTTG	BRCA_HER-positive carcinoma
FASN_c.437T>C_p.F146S	FASN_c.437T>C_p.F146S_5	AGAAGAAGGAGAGCCGGTT	BRCA_HER-positive carcinoma
FASN_c.437T>C_p.F146S	FASN_c.437T>C_p.F146S_6	AAGAAGAAGGAGAGCCGGT	BRCA_HER-positive carcinoma
WDR45B_c.931A>G_p.I311V	WDR45B_c.931A>G_p.I311V_6	CCAGCAATTTGTGCAGACG	Small cell carcinoma
WDR45B_c.931A>G_p.I311V	WDR45B_c.931A>G_p.I311V_5	CAGCAATTTGTGCAGACGG	Small cell carcinoma
WDR45B_c.931A>G_p.I311V	WDR45B_c.931A>G_p.I311V_2	CAATTTGTGCAGACGGCAG	Small cell carcinoma
WDR45B_c.931A>G_p.I311V	WDR45B_c.931A>G_p.I311V_3	GCAATTTGTGCAGACGGCA	Small cell carcinoma
WDR45B_c.931A>G_p.I311V	WDR45B_c.931A>G_p.I311V_4	AGCAATTTGTGCAGACGGC	Small cell carcinoma
TAF4B_c.974A>G_p.K325R	TAF4B_c.974A>G_p.K325R_2	GAAAAGCGTGGTTGCCTTA	Hepatocellular carcinoma
TAF4B_c.974A>G_p.K325R	TAF4B_c.974A>G_p.K325R_3	AGAAAAGCGTGGTTGCCTT	Hepatocellular carcinoma
TAF4B_c.974A>G_p.K325R	TAF4B_c.974A>G_p.K325R_4	CAGAAAAGCGTGGTTGCCT	Hepatocellular carcinoma
TAF4B_c.974A>G_p.K325R	TAF4B_c.974A>G_p.K325R_5	CCAGAAAAGCGTGGTTGCC	Hepatocellular carcinoma
TAF4B_c.974A>G_p.K325R	TAF4B_c.974A>G_p.K325R_6	TCCAGAAAAGCGTGGTTGC	Hepatocellular carcinoma
DSC2_c.1948A>G_p.I650V	DSC2_c.1948A>G_p.I650V_2	CTATAACAGTGAGAGATAG	Small cell carcinoma
DSC2_c.1948A>G_p.I650V	DSC2_c.1948A>G_p.I650V_3	CCTATAACAGTGAGAGATA	Small cell carcinoma
DSC2_c.1948A>G_p.I650V	DSC2_c.1948A>G_p.I650V_4	ACCTATAACAGTGAGAGAT	Small cell carcinoma
DSC2_c.1948A>G_p.I650V	DSC2_c.1948A>G_p.I650V_5	TACCTATAACAGTGAGAGA	Small cell carcinoma
DSC2_c.1948A>G_p.I650V	DSC2_c.1948A>G_p.I650V_6	GTACCTATAACAGTGAGAG	Small cell carcinoma
ASXL3_c.5729T>C_p.L1910P	ASXL3_c.5729T>C_p.L1910P_5	GAAATAGGTTCTGCTGGAA	Hepatocellular carcinoma
ASXL3_c.5729T>C_p.L1910P	ASXL3_c.5729T>C_p.L1910P_2	ATAGGTTCTGCTGGAAGCT	Hepatocellular carcinoma
ASXL3_c.5729T>C_p.L1910P	ASXL3_c.5729T>C_p.L1910P_3	AATAGGTTCTGCTGGAAGC	Hepatocellular carcinoma
ASXL3_c.5729T>C_p.L1910P	ASXL3_c.5729T>C_p.L1910P_4	AAATAGGTTCTGCTGGAAG	Hepatocellular carcinoma
ASXL3_c.5729T>C_p.L1910P	ASXL3_c.5729T>C_p.L1910P_6	TGAAATAGGTTCTGCTGGA	Hepatocellular carcinoma
ELOA3D_c.1163A>G_p.E388G	ELOA3D_c.1163A>G_p.E388G_2	AGAGACAGATGAATTATGG	BRCA_HER-positive carcinoma
ELOA3D_c.1163A>G_p.E388G	ELOA3D_c.1163A>G_p.E388G_3	GAGAGACAGATGAATTATG	BRCA_HER-positive carcinoma
ELOA3D_c.1163A>G_p.E388G	ELOA3D_c.1163A>G_p.E388G_4	CGAGAGACAGATGAATTAT	BRCA_HER-positive carcinoma
ELOA3D_c.1163A>G_p.E388G	ELOA3D_c.1163A>G_p.E388G_5	TCGAGAGACAGATGAATTA	BRCA_HER-positive carcinoma
ELOA3D_c.1163A>G_p.E388G	ELOA3D_c.1163A>G_p.E388G_6	CTCGAGAGACAGATGAATT	BRCA_HER-positive carcinoma
SMAD7_c.403A>G_p.R135G	SMAD7_c.403A>G_p.R135G_2	GCAGGCTGGGCCCGGGGGC	Hepatocellular carcinoma
SMAD7_c.403A>G_p.R135G	SMAD7_c.403A>G_p.R135G_3	TGCAGGCTGGGCCCGGGGG	Hepatocellular carcinoma
SMAD7_c.403A>G_p.R135G	SMAD7_c.403A>G_p.R135G_4	CTGCAGGCTGGGCCCGGGG	Hepatocellular carcinoma
SMAD7_c.403A>G_p.R135G	SMAD7_c.403A>G_p.R135G_5	ACTGCAGGCTGGGCCCGGG	Hepatocellular carcinoma
SMAD7_c.403A>G_p.R135G	SMAD7_c.403A>G_p.R135G_6	GACTGCAGGCTGGGCCCGG	Hepatocellular carcinoma
CFAP53_c.1223A>G_p.E408G	CFAP53_c.1223A>G_p.E408G_3	GAGAAGCTAAAGAACAGGA	BRCA_HER-positive carcinoma
CFAP53_c.1223A>G_p.E408G	CFAP53_c.1223A>G_p.E408G_2	AGAAGCTAAAGAACAGGAA	BRCA_HER-positive carcinoma
CFAP53_c.1223A>G_p.E408G	CFAP53_c.1223A>G_p.E408G_4	CGAGAAGCTAAAGAACAGG	BRCA_HER-positive carcinoma
CFAP53_c.1223A>G_p.E408G	CFAP53_c.1223A>G_p.E408G_5	ACGAGAAGCTAAAGAACAG	BRCA_HER-positive carcinoma
CFAP53_c.1223A>G_p.E408G	CFAP53_c.1223A>G_p.E408G_6	AACGAGAAGCTAAAGAACA	BRCA_HER-positive carcinoma
DSEL_c.2878T>C_p.Y960H	DSEL_c.2878T>C_p.Y960H_2	ATATTGGGCCAGTTTACCC	BRCA_HER-positive carcinoma
DSEL_c.2878T>C_p.Y960H	DSEL_c.2878T>C_p.Y960H_3	AATATTGGGCCAGTTTACC	BRCA_HER-positive carcinoma
DSEL_c.2878T>C_p.Y960H	DSEL_c.2878T>C_p.Y960H_4	AAATATTGGGCCAGTTTAC	BRCA_HER-positive carcinoma
DSEL_c.2878T>C_p.Y960H	DSEL_c.2878T>C_p.Y960H_5	AAAATATTGGGCCAGTTTA	BRCA_HER-positive carcinoma
DSEL_c.2878T>C_p.Y960H	DSEL_c.2878T>C_p.Y960H_6	CAAAATATTGGGCCAGTTT	BRCA_HER-positive carcinoma
RTTN_c.4850T>C_p.M1617T	RTTN_c.4850T>C_p.M1617T_6	CTGCACATTGCTGAAAGAA	Non small cell carcinoma
RTTN_c.4850T>C_p.M1617T	RTTN_c.4850T>C_p.M1617T_5	TGCACATTGCTGAAAGAAG	Non small cell carcinoma
RTTN_c.4850T>C_p.M1617T	RTTN_c.4850T>C_p.M1617T_2	ACATTGCTGAAAGAAGAGA	Non small cell carcinoma
RTTN_c.4850T>C_p.M1617T	RTTN_c.4850T>C_p.M1617T_3	CACATTGCTGAAAGAAGAG	Non small cell carcinoma
RTTN_c.4850T>C_p.M1617T	RTTN_c.4850T>C_p.M1617T_4	GCACATTGCTGAAAGAAGA	Non small cell carcinoma
ZNF516_c.239A>G_p.H80R	ZNF516_c.239A>G_p.H80R_5	GATTCACATCCGGAGCCAC	Hepatocellular carcinoma
ZNF516_c.239A>G_p.H80R	ZNF516_c.239A>G_p.H80R_6	AGATTCACATCCGGAGCCA	Hepatocellular carcinoma
ZNF516_c.239A>G_p.H80R	ZNF516_c.239A>G_p.H80R_3	TTCACATCCGGAGCCACCG	Hepatocellular carcinoma
ZNF516_c.239A>G_p.H80R	ZNF516_c.239A>G_p.H80R_4	ATTCACATCCGGAGCCACC	Hepatocellular carcinoma
ZNF516_c.239A>G_p.H80R	ZNF516_c.239A>G_p.H80R_2	TCACATCCGGAGCCACCGC	Hepatocellular carcinoma
MBP_c.208A>G_p.T70A	MBP_c.208A>G_p.T70A_3	CGCACAGCGGACCCGAAGA	BRCA_HER-positive carcinoma
MBP_c.208A>G_p.T70A	MBP_c.208A>G_p.T70A_4	GCGCACAGCGGACCCGAAG	BRCA_HER-positive carcinoma
MBP_c.208A>G_p.T70A	MBP_c.208A>G_p.T70A_2	GCACAGCGGACCCGAAGAA	BRCA_HER-positive carcinoma
MBP_c.208A>G_p.T70A	MBP_c.208A>G_p.T70A_5	AGCGCACAGCGGACCCGAA	BRCA_HER-positive carcinoma
MBP_c.208A>G_p.T70A	MBP_c.208A>G_p.T70A_6	AAGCGCACAGCGGACCCGA	BRCA_HER-positive carcinoma
PTPRM_c.2593A>G_p.T865A	PTPRM_c.2593A>G_p.T865A_3	GATACCAGCAGCCTGGTGC	Small cell carcinoma
PTPRM_c.2593A>G_p.T865A	PTPRM_c.2593A>G_p.T865A_2	ATACCAGCAGCCTGGTGCA	Small cell carcinoma
PTPRM_c.2593A>G_p.T865A	PTPRM_c.2593A>G_p.T865A_6	AGCGATACCAGCAGCCTGG	Small cell carcinoma
PTPRM_c.2593A>G_p.T865A	PTPRM_c.2593A>G_p.T865A_4	CGATACCAGCAGCCTGGTG	Small cell carcinoma
PTPRM_c.2593A>G_p.T865A	PTPRM_c.2593A>G_p.T865A_5	GCGATACCAGCAGCCTGGT	Small cell carcinoma
RDH8_c.665T>C_p.M222T	RDH8_c.665T>C_p.M222T_2	CCATAGAAACCTGCGCCAG	Hepatocellular carcinoma
RDH8_c.665T>C_p.M222T	RDH8_c.665T>C_p.M222T_6	TCAGCCATAGAAACCTGCG	Hepatocellular carcinoma
RDH8_c.665T>C_p.M222T	RDH8_c.665T>C_p.M222T_3	GCCATAGAAACCTGCGCCA	Hepatocellular carcinoma
RDH8_c.665T>C_p.M222T	RDH8_c.665T>C_p.M222T_4	AGCCATAGAAACCTGCGCC	Hepatocellular carcinoma
RDH8_c.665T>C_p.M222T	RDH8_c.665T>C_p.M222T_5	CAGCCATAGAAACCTGCGC	Hepatocellular carcinoma
PPAN_c.679A>G_p.I227V	PPAN_c.679A>G_p.I227V_2	ACATCAGCGAGCTGCTGGC	Hepatocellular carcinoma
PPAN_c.679A>G_p.I227V	PPAN_c.679A>G_p.I227V_6	CAGGACATCAGCGAGCTGC	Hepatocellular carcinoma
PPAN_c.679A>G_p.I227V	PPAN_c.679A>G_p.I227V_3	GACATCAGCGAGCTGCTGG	Hepatocellular carcinoma
PPAN_c.679A>G_p.I227V	PPAN_c.679A>G_p.I227V_4	GGACATCAGCGAGCTGCTG	Hepatocellular carcinoma
PPAN_c.679A>G_p.I227V	PPAN_c.679A>G_p.I227V_5	AGGACATCAGCGAGCTGCT	Hepatocellular carcinoma
KEAP1_c.1328A>G_p.Y443C	KEAP1_c.1328A>G_p.Y443C_4	AGGTATGAGCCAGAGCGGG	Hepatocellular carcinoma
KEAP1_c.1328A>G_p.Y443C	KEAP1_c.1328A>G_p.Y443C_5	CAGGTATGAGCCAGAGCGG	Hepatocellular carcinoma
KEAP1_c.1328A>G_p.Y443C	KEAP1_c.1328A>G_p.Y443C_2	GTATGAGCCAGAGCGGGAT	Hepatocellular carcinoma
KEAP1_c.1328A>G_p.Y443C	KEAP1_c.1328A>G_p.Y443C_3	GGTATGAGCCAGAGCGGGA	Hepatocellular carcinoma
KEAP1_c.1328A>G_p.Y443C	KEAP1_c.1328A>G_p.Y443C_6	GCAGGTATGAGCCAGAGCG	Hepatocellular carcinoma
KEAP1_c.424A>G_p.T142A	KEAP1_c.424A>G_p.T142A_4	CTACACGGCCTCCATCTCC	Hepatocellular carcinoma
KEAP1_c.424A>G_p.T142A	KEAP1_c.424A>G_p.T142A_5	CCTACACGGCCTCCATCTC	Hepatocellular carcinoma
KEAP1_c.424A>G_p.T142A	KEAP1_c.424A>G_p.T142A_2	ACACGGCCTCCATCTCCAT	Hepatocellular carcinoma
KEAP1_c.424A>G_p.T142A	KEAP1_c.424A>G_p.T142A_3	TACACGGCCTCCATCTCCA	Hepatocellular carcinoma
KEAP1_c.424A>G_p.T142A	KEAP1_c.424A>G_p.T142A_6	GCCTACACGGCCTCCATCT	Hepatocellular carcinoma
KEAP1_c.199A>G_p.M67V	KEAP1_c.199A>G_p.M67V_4	CATCATGAACGAGCTGCGG	Non small cell carcinoma
KEAP1_c.199A>G_p.M67V	KEAP1_c.199A>G_p.M67V_2	TCATGAACGAGCTGCGGCT	Non small cell carcinoma
KEAP1_c.199A>G_p.M67V	KEAP1_c.199A>G_p.M67V_3	ATCATGAACGAGCTGCGGC	Non small cell carcinoma
KEAP1_c.199A>G_p.M67V	KEAP1_c.199A>G_p.M67V_5	GCATCATGAACGAGCTGCG	Non small cell carcinoma
KEAP1_c.199A>G_p.M67V	KEAP1_c.199A>G_p.M67V_6	GGCATCATGAACGAGCTGC	Non small cell carcinoma
SMARCA4_c.103T>C_p.S35P	SMARCA4_c.103T>C_p.S35P_5	CGGCGAGGGACCCGGGCTA	Hepatocellular carcinoma
SMARCA4_c.103T>C_p.S35P	SMARCA4_c.103T>C_p.S35P_2	CGAGGGACCCGGGCTAGGG	Hepatocellular carcinoma
SMARCA4_c.103T>C_p.S35P	SMARCA4_c.103T>C_p.S35P_3	GCGAGGGACCCGGGCTAGG	Hepatocellular carcinoma
SMARCA4_c.103T>C_p.S35P	SMARCA4_c.103T>C_p.S35P_6	CCGGCGAGGGACCCGGGCT	Hepatocellular carcinoma
SMARCA4_c.103T>C_p.S35P	SMARCA4_c.103T>C_p.S35P_4	GGCGAGGGACCCGGGCTAG	Hepatocellular carcinoma
CALR_c.472A>G_p.N158D	CALR_c.472A>G_p.N158D_2	TCAACAAGGACATCCGTTG	Hepatocellular carcinoma
CALR_c.472A>G_p.N158D	CALR_c.472A>G_p.N158D_3	ATCAACAAGGACATCCGTT	Hepatocellular carcinoma
CALR_c.472A>G_p.N158D	CALR_c.472A>G_p.N158D_4	GATCAACAAGGACATCCGT	Hepatocellular carcinoma
CALR_c.472A>G_p.N158D	CALR_c.472A>G_p.N158D_6	CTGATCAACAAGGACATCC	Hepatocellular carcinoma
CALR_c.472A>G_p.N158D	CALR_c.472A>G_p.N158D_5	TGATCAACAAGGACATCCG	Hepatocellular carcinoma
CACNA1A_c.3862A>G_p.T1288A	CACNA1A_c.3862A>G_p.T1288A_2	TTACAGGCGTCTTTACCTT	Hepatocellular carcinoma
CACNA1A_c.3862A>G_p.T1288A	CACNA1A_c.3862A>G_p.T1288A_3	TTTACAGGCGTCTTTACCT	Hepatocellular carcinoma
CACNA1A_c.3862A>G_p.T1288A	CACNA1A_c.3862A>G_p.T1288A_4	TTTTACAGGCGTCTTTACC	Hepatocellular carcinoma
CACNA1A_c.3862A>G_p.T1288A	CACNA1A_c.3862A>G_p.T1288A_5	TTTTTACAGGCGTCTTTAC	Hepatocellular carcinoma
CACNA1A_c.3862A>G_p.T1288A	CACNA1A_c.3862A>G_p.T1288A_6	GTTTTTACAGGCGTCTTTA	Hepatocellular carcinoma
ADGRE3_c.746T>C_p.I249T	ADGRE3_c.746T>C_p.I249T_2	TTATGATGTTTCCAAGAGA	BRCA_HER-positive carcinoma
ADGRE3_c.746T>C_p.I249T	ADGRE3_c.746T>C_p.I249T_4	ATTTATGATGTTTCCAAGA	BRCA_HER-positive carcinoma
ADGRE3_c.746T>C_p.I249T	ADGRE3_c.746T>C_p.I249T_5	CATTTATGATGTTTCCAAG	BRCA_HER-positive carcinoma
ADGRE3_c.746T>C_p.I249T	ADGRE3_c.746T>C_p.I249T_6	GCATTTATGATGTTTCCAA	BRCA_HER-positive carcinoma
ADGRE3_c.746T>C_p.I249T	ADGRE3_c.746T>C_p.I249T_3	TTTATGATGTTTCCAAGAG	BRCA_HER-positive carcinoma
ZNF430_c.1198T>C_p.F400L	ZNF430_c.1198T>C_p.F400L_2	GAATTTCTCTCCAGTATGA	Non small cell carcinoma
ZNF430_c.1198T>C_p.F400L	ZNF430_c.1198T>C_p.F400L_4	TAGAATTTCTCTCCAGTAT	Non small cell carcinoma
ZNF430_c.1198T>C_p.F400L	ZNF430_c.1198T>C_p.F400L_5	GTAGAATTTCTCTCCAGTA	Non small cell carcinoma
ZNF430_c.1198T>C_p.F400L	ZNF430_c.1198T>C_p.F400L_6	TGTAGAATTTCTCTCCAGT	Non small cell carcinoma
ZNF430_c.1198T>C_p.F400L	ZNF430_c.1198T>C_p.F400L_3	AGAATTTCTCTCCAGTATG	Non small cell carcinoma
ZNF430_c.1199T>C_p.F400S	ZNF430_c.1199T>C_p.F400S_2	AGAATTTCTCTCCAGTATG	Non small cell carcinoma
ZNF430_c.1199T>C_p.F400S	ZNF430_c.1199T>C_p.F400S_3	TAGAATTTCTCTCCAGTAT	Non small cell carcinoma
ZNF430_c.1199T>C_p.F400S	ZNF430_c.1199T>C_p.F400S_4	GTAGAATTTCTCTCCAGTA	Non small cell carcinoma
ZNF430_c.1199T>C_p.F400S	ZNF430_c.1199T>C_p.F400S_5	TGTAGAATTTCTCTCCAGT	Non small cell carcinoma
ZNF430_c.1199T>C_p.F400S	ZNF430_c.1199T>C_p.F400S_6	TTGTAGAATTTCTCTCCAG	Non small cell carcinoma
ZNF714_c.1271T>C_p.L424P	ZNF714_c.1271T>C_p.L424P_3	TAGAGTTTCTCTCCAGTAT	Non small cell carcinoma
ZNF714_c.1271T>C_p.L424P	ZNF714_c.1271T>C_p.L424P_4	GTAGAGTTTCTCTCCAGTA	Non small cell carcinoma
ZNF714_c.1271T>C_p.L424P	ZNF714_c.1271T>C_p.L424P_5	TGTAGAGTTTCTCTCCAGT	Non small cell carcinoma
ZNF714_c.1271T>C_p.L424P	ZNF714_c.1271T>C_p.L424P_2	AGAGTTTCTCTCCAGTATG	Non small cell carcinoma
ZNF714_c.1271T>C_p.L424P	ZNF714_c.1271T>C_p.L424P_6	TTGTAGAGTTTCTCTCCAG	Non small cell carcinoma
ZNF708_c.1519A>G_p.K507E	ZNF708_c.1519A>G_p.K507E_2	GTAAAGAATGTGGCAAAGC	Non small cell carcinoma
ZNF708_c.1519A>G_p.K507E	ZNF708_c.1519A>G_p.K507E_3	TGTAAAGAATGTGGCAAAG	Non small cell carcinoma
ZNF708_c.1519A>G_p.K507E	ZNF708_c.1519A>G_p.K507E_4	ATGTAAAGAATGTGGCAAA	Non small cell carcinoma
ZNF708_c.1519A>G_p.K507E	ZNF708_c.1519A>G_p.K507E_5	AATGTAAAGAATGTGGCAA	Non small cell carcinoma
ZNF708_c.1519A>G_p.K507E	ZNF708_c.1519A>G_p.K507E_6	AAATGTAAAGAATGTGGCA	Non small cell carcinoma
ZNF708_c.1249A>G_p.K417E	ZNF708_c.1249A>G_p.K417E_5	CTGGAAAGAAACCCTACAA	Non small cell carcinoma
ZNF708_c.1249A>G_p.K417E	ZNF708_c.1249A>G_p.K417E_2	GAAAGAAACCCTACAAATG	Non small cell carcinoma
ZNF708_c.1249A>G_p.K417E	ZNF708_c.1249A>G_p.K417E_3	GGAAAGAAACCCTACAAAT	Non small cell carcinoma
ZNF708_c.1249A>G_p.K417E	ZNF708_c.1249A>G_p.K417E_6	ACTGGAAAGAAACCCTACA	Non small cell carcinoma
ZNF708_c.1249A>G_p.K417E	ZNF708_c.1249A>G_p.K417E_4	TGGAAAGAAACCCTACAAA	Non small cell carcinoma
ZNF429_c.926A>G_p.E309G	ZNF429_c.926A>G_p.E309G_2	TGAAGAGAAACCCTACAAA	Non small cell carcinoma
ZNF429_c.926A>G_p.E309G	ZNF429_c.926A>G_p.E309G_3	CTGAAGAGAAACCCTACAA	Non small cell carcinoma
ZNF429_c.926A>G_p.E309G	ZNF429_c.926A>G_p.E309G_4	ACTGAAGAGAAACCCTACA	Non small cell carcinoma
ZNF429_c.926A>G_p.E309G	ZNF429_c.926A>G_p.E309G_6	ATACTGAAGAGAAACCCTA	Non small cell carcinoma
ZNF429_c.926A>G_p.E309G	ZNF429_c.926A>G_p.E309G_5	TACTGAAGAGAAACCCTAC	Non small cell carcinoma
ZNF492_c.226T>C_p.C76R	ZNF492_c.226T>C_p.C76R_2	ACATCCACATTTTTTATAT	Non small cell carcinoma
ZNF492_c.226T>C_p.C76R	ZNF492_c.226T>C_p.C76R_3	CACATCCACATTTTTTATA	Non small cell carcinoma
ZNF492_c.226T>C_p.C76R	ZNF492_c.226T>C_p.C76R_4	TCACATCCACATTTTTTAT	Non small cell carcinoma
ZNF492_c.226T>C_p.C76R	ZNF492_c.226T>C_p.C76R_5	TTCACATCCACATTTTTTA	Non small cell carcinoma
ZNF492_c.226T>C_p.C76R	ZNF492_c.226T>C_p.C76R_6	TTTCACATCCACATTTTTT	Non small cell carcinoma
ZNF681_c.1513T>C_p.S505P	ZNF681_c.1513T>C_p.S505P_2	GGATTTCTCTCCAGTATGA	Non small cell carcinoma
ZNF681_c.1513T>C_p.S505P	ZNF681_c.1513T>C_p.S505P_4	TAGGATTTCTCTCCAGTAT	Non small cell carcinoma
ZNF681_c.1513T>C_p.S505P	ZNF681_c.1513T>C_p.S505P_5	GTAGGATTTCTCTCCAGTA	Non small cell carcinoma
ZNF681_c.1513T>C_p.S505P	ZNF681_c.1513T>C_p.S505P_6	TGTAGGATTTCTCTCCAGT	Non small cell carcinoma
ZNF681_c.1513T>C_p.S505P	ZNF681_c.1513T>C_p.S505P_3	AGGATTTCTCTCCAGTATG	Non small cell carcinoma
CACTIN_c.2267A>G_p.Y756C	CACTIN_c.2267A>G_p.Y756C_2	CTATCGGCGGTGACGGCCC	BRCA_HER-positive carcinoma
CACTIN_c.2267A>G_p.Y756C	CACTIN_c.2267A>G_p.Y756C_4	CGCTATCGGCGGTGACGGC	BRCA_HER-positive carcinoma
CACTIN_c.2267A>G_p.Y756C	CACTIN_c.2267A>G_p.Y756C_5	CCGCTATCGGCGGTGACGG	BRCA_HER-positive carcinoma
CACTIN_c.2267A>G_p.Y756C	CACTIN_c.2267A>G_p.Y756C_6	ACCGCTATCGGCGGTGACG	BRCA_HER-positive carcinoma
CACTIN_c.2267A>G_p.Y756C	CACTIN_c.2267A>G_p.Y756C_3	GCTATCGGCGGTGACGGCC	BRCA_HER-positive carcinoma
ZNF850_c.2351T>C_p.L784P	ZNF850_c.2351T>C_p.L784P_2	AGAGCTTCTCACCAGTGTG	Non small cell carcinoma
ZNF850_c.2351T>C_p.L784P	ZNF850_c.2351T>C_p.L784P_3	TAGAGCTTCTCACCAGTGT	Non small cell carcinoma
ZNF850_c.2351T>C_p.L784P	ZNF850_c.2351T>C_p.L784P_4	ATAGAGCTTCTCACCAGTG	Non small cell carcinoma
ZNF850_c.2351T>C_p.L784P	ZNF850_c.2351T>C_p.L784P_5	CATAGAGCTTCTCACCAGT	Non small cell carcinoma
ZNF850_c.2351T>C_p.L784P	ZNF850_c.2351T>C_p.L784P_6	TCATAGAGCTTCTCACCAG	Non small cell carcinoma
ZNF571_c.461T>C_p.L154P	ZNF571_c.461T>C_p.L154P_3	ATAAGGCATGACAGGTAGC	Hepatocellular carcinoma
ZNF571_c.461T>C_p.L154P	ZNF571_c.461T>C_p.L154P_4	AATAAGGCATGACAGGTAG	Hepatocellular carcinoma
ZNF571_c.461T>C_p.L154P	ZNF571_c.461T>C_p.L154P_5	GAATAAGGCATGACAGGTA	Hepatocellular carcinoma
ZNF571_c.461T>C_p.L154P	ZNF571_c.461T>C_p.L154P_2	TAAGGCATGACAGGTAGCT	Hepatocellular carcinoma
ZNF571_c.461T>C_p.L154P	ZNF571_c.461T>C_p.L154P_6	TGAATAAGGCATGACAGGT	Hepatocellular carcinoma
SIPA1L3_c.901A>G_p.I301V	SIPA1L3_c.901A>G_p.I301V_2	CCATCTTTCGGAAGCTAAG	Hepatocellular carcinoma
SIPA1L3_c.901A>G_p.I301V	SIPA1L3_c.901A>G_p.I301V_3	TCCATCTTTCGGAAGCTAA	Hepatocellular carcinoma
SIPA1L3_c.901A>G_p.I301V	SIPA1L3_c.901A>G_p.I301V_4	GTCCATCTTTCGGAAGCTA	Hepatocellular carcinoma
SIPA1L3_c.901A>G_p.I301V	SIPA1L3_c.901A>G_p.I301V_5	CGTCCATCTTTCGGAAGCT	Hepatocellular carcinoma
SIPA1L3_c.901A>G_p.I301V	SIPA1L3_c.901A>G_p.I301V_6	TCGTCCATCTTTCGGAAGC	Hepatocellular carcinoma
EEF2_c.478A>G_p.M160V	EEF2_c.478A>G_p.M160V_6	AACAAGATGGACCGCGCCC	Hepatocellular carcinoma
EEF2_c.478A>G_p.M160V	EEF2_c.478A>G_p.M160V_2	AGATGGACCGCGCCCTGCT	Hepatocellular carcinoma
EEF2_c.478A>G_p.M160V	EEF2_c.478A>G_p.M160V_3	AAGATGGACCGCGCCCTGC	Hepatocellular carcinoma
EEF2_c.478A>G_p.M160V	EEF2_c.478A>G_p.M160V_5	ACAAGATGGACCGCGCCCT	Hepatocellular carcinoma
EEF2_c.478A>G_p.M160V	EEF2_c.478A>G_p.M160V_4	CAAGATGGACCGCGCCCTG	Hepatocellular carcinoma
SIRT6_c.299A>G_p.Q100R	SIRT6_c.299A>G_p.Q100R_3	TGCAGCTGGAGCGCGTGGG	BRCA_HER-positive carcinoma
SIRT6_c.299A>G_p.Q100R	SIRT6_c.299A>G_p.Q100R_4	GTGCAGCTGGAGCGCGTGG	BRCA_HER-positive carcinoma
SIRT6_c.299A>G_p.Q100R	SIRT6_c.299A>G_p.Q100R_5	GGTGCAGCTGGAGCGCGTG	BRCA_HER-positive carcinoma
SIRT6_c.299A>G_p.Q100R	SIRT6_c.299A>G_p.Q100R_2	GCAGCTGGAGCGCGTGGGC	BRCA_HER-positive carcinoma
SIRT6_c.299A>G_p.Q100R	SIRT6_c.299A>G_p.Q100R_6	TGGTGCAGCTGGAGCGCGT	BRCA_HER-positive carcinoma
PSG1_c.629A>G_p.Y210C	PSG1_c.629A>G_p.Y210C_3	AGTATACTGCAGGACCCTA	Hepatocellular carcinoma
PSG1_c.629A>G_p.Y210C	PSG1_c.629A>G_p.Y210C_4	AAGTATACTGCAGGACCCT	Hepatocellular carcinoma
PSG1_c.629A>G_p.Y210C	PSG1_c.629A>G_p.Y210C_2	GTATACTGCAGGACCCTAT	Hepatocellular carcinoma
PSG1_c.629A>G_p.Y210C	PSG1_c.629A>G_p.Y210C_6	CAAAGTATACTGCAGGACC	Hepatocellular carcinoma
PSG1_c.629A>G_p.Y210C	PSG1_c.629A>G_p.Y210C_5	AAAGTATACTGCAGGACCC	Hepatocellular carcinoma
DMPK_c.214A>G_p.K72E	DMPK_c.214A>G_p.K72E_2	TTAAGGAGGTCCGACTGCA	Hepatocellular carcinoma
DMPK_c.214A>G_p.K72E	DMPK_c.214A>G_p.K72E_3	CTTAAGGAGGTCCGACTGC	Hepatocellular carcinoma
DMPK_c.214A>G_p.K72E	DMPK_c.214A>G_p.K72E_6	AGGCTTAAGGAGGTCCGAC	Hepatocellular carcinoma
DMPK_c.214A>G_p.K72E	DMPK_c.214A>G_p.K72E_4	GCTTAAGGAGGTCCGACTG	Hepatocellular carcinoma
DMPK_c.214A>G_p.K72E	DMPK_c.214A>G_p.K72E_5	GGCTTAAGGAGGTCCGACT	Hepatocellular carcinoma
CCDC114_c.869A>G_p.Y290C	CCDC114_c.869A>G_p.Y290C_2	GTATCTGGAGAGTGAGTGG	Hepatocellular carcinoma
CCDC114_c.869A>G_p.Y290C	CCDC114_c.869A>G_p.Y290C_3	AGTATCTGGAGAGTGAGTG	Hepatocellular carcinoma
CCDC114_c.869A>G_p.Y290C	CCDC114_c.869A>G_p.Y290C_6	AGAAGTATCTGGAGAGTGA	Hepatocellular carcinoma
CCDC114_c.869A>G_p.Y290C	CCDC114_c.869A>G_p.Y290C_4	AAGTATCTGGAGAGTGAGT	Hepatocellular carcinoma
CCDC114_c.869A>G_p.Y290C	CCDC114_c.869A>G_p.Y290C_5	GAAGTATCTGGAGAGTGAG	Hepatocellular carcinoma
EMP3_c.353A>G_p.Y118C	EMP3_c.353A>G_p.Y118C_2	CTATGCCATTCACGCCGAG	Hepatocellular carcinoma
EMP3_c.353A>G_p.Y118C	EMP3_c.353A>G_p.Y118C_4	ATCTATGCCATTCACGCCG	Hepatocellular carcinoma
EMP3_c.353A>G_p.Y118C	EMP3_c.353A>G_p.Y118C_5	GATCTATGCCATTCACGCC	Hepatocellular carcinoma
EMP3_c.353A>G_p.Y118C	EMP3_c.353A>G_p.Y118C_6	TGATCTATGCCATTCACGC	Hepatocellular carcinoma
EMP3_c.353A>G_p.Y118C	EMP3_c.353A>G_p.Y118C_3	TCTATGCCATTCACGCCGA	Hepatocellular carcinoma
SIGLEC11_c.779A>G_p.H260R	SIGLEC11_c.779A>G_p.H260R_4	TCACATGACAACACGTCAG	Non small cell carcinoma
SIGLEC11_c.779A>G_p.H260R	SIGLEC11_c.779A>G_p.H260R_5	TTCACATGACAACACGTCA	Non small cell carcinoma
SIGLEC11_c.779A>G_p.H260R	SIGLEC11_c.779A>G_p.H260R_6	TTTCACATGACAACACGTC	Non small cell carcinoma
SIGLEC11_c.779A>G_p.H260R	SIGLEC11_c.779A>G_p.H260R_2	ACATGACAACACGTCAGGT	Non small cell carcinoma
SIGLEC11_c.779A>G_p.H260R	SIGLEC11_c.779A>G_p.H260R_3	CACATGACAACACGTCAGG	Non small cell carcinoma
SHANK1_c.2392T>C_p.Y798H	SHANK1_c.2392T>C_p.Y798H_4	TCGTACTCTGTGGGCAAAG	BRCA_HER-positive carcinoma
SHANK1_c.2392T>C_p.Y798H	SHANK1_c.2392T>C_p.Y798H_5	CTCGTACTCTGTGGGCAAA	BRCA_HER-positive carcinoma
SHANK1_c.2392T>C_p.Y798H	SHANK1_c.2392T>C_p.Y798H_2	GTACTCTGTGGGCAAAGAA	BRCA_HER-positive carcinoma
SHANK1_c.2392T>C_p.Y798H	SHANK1_c.2392T>C_p.Y798H_3	CGTACTCTGTGGGCAAAGA	BRCA_HER-positive carcinoma
SHANK1_c.2392T>C_p.Y798H	SHANK1_c.2392T>C_p.Y798H_6	GCTCGTACTCTGTGGGCAA	BRCA_HER-positive carcinoma
SIGLEC10_c.874A>G_p.N292D	SIGLEC10_c.874A>G_p.N292D_6	CTGCAGAACAGAGTCCTCT	Non small cell carcinoma, Hepatocellular carcinoma
SIGLEC10_c.874A>G_p.N292D	SIGLEC10_c.874A>G_p.N292D_2	AGAACAGAGTCCTCTCCTC	Non small cell carcinoma, Hepatocellular carcinoma
SIGLEC10_c.874A>G_p.N292D	SIGLEC10_c.874A>G_p.N292D_3	CAGAACAGAGTCCTCTCCT	Non small cell carcinoma, Hepatocellular carcinoma
SIGLEC10_c.874A>G_p.N292D	SIGLEC10_c.874A>G_p.N292D_4	GCAGAACAGAGTCCTCTCC	Non small cell carcinoma, Hepatocellular carcinoma
SIGLEC10_c.874A>G_p.N292D	SIGLEC10_c.874A>G_p.N292D_5	TGCAGAACAGAGTCCTCTC	Non small cell carcinoma, Hepatocellular carcinoma
LENG9_c.941T>C_p.V314A	LENG9_c.941T>C_p.V314A_3	GTCACTTCTGCTTGTAGCC	Small cell carcinoma
LENG9_c.941T>C_p.V314A	LENG9_c.941T>C_p.V314A_4	GGTCACTTCTGCTTGTAGC	Small cell carcinoma
LENG9_c.941T>C_p.V314A	LENG9_c.941T>C_p.V314A_5	TGGTCACTTCTGCTTGTAG	Small cell carcinoma
LENG9_c.941T>C_p.V314A	LENG9_c.941T>C_p.V314A_2	TCACTTCTGCTTGTAGCCC	Small cell carcinoma
LENG9_c.941T>C_p.V314A	LENG9_c.941T>C_p.V314A_6	TTGGTCACTTCTGCTTGTA	Small cell carcinoma
LILRA2_c.610T>C_p.Y204H	LILRA2_c.610T>C_p.Y204H_2	ATAGGGAGAGTTCGAGTCA	Non small cell carcinoma
LILRA2_c.610T>C_p.Y204H	LILRA2_c.610T>C_p.Y204H_3	CATAGGGAGAGTTCGAGTC	Non small cell carcinoma
LILRA2_c.610T>C_p.Y204H	LILRA2_c.610T>C_p.Y204H_4	ACATAGGGAGAGTTCGAGT	Non small cell carcinoma
LILRA2_c.610T>C_p.Y204H	LILRA2_c.610T>C_p.Y204H_5	CACATAGGGAGAGTTCGAG	Non small cell carcinoma
LILRA2_c.610T>C_p.Y204H	LILRA2_c.610T>C_p.Y204H_6	ACACATAGGGAGAGTTCGA	Non small cell carcinoma
RDH13_c.766A>G_p.I256V	RDH13_c.766A>G_p.I256V_2	CCATCTTCTGGCTGCTGGT	Hepatocellular carcinoma
RDH13_c.766A>G_p.I256V	RDH13_c.766A>G_p.I256V_3	CCCATCTTCTGGCTGCTGG	Hepatocellular carcinoma
RDH13_c.766A>G_p.I256V	RDH13_c.766A>G_p.I256V_5	GGCCCATCTTCTGGCTGCT	Hepatocellular carcinoma
RDH13_c.766A>G_p.I256V	RDH13_c.766A>G_p.I256V_6	GGGCCCATCTTCTGGCTGC	Hepatocellular carcinoma
RDH13_c.766A>G_p.I256V	RDH13_c.766A>G_p.I256V_4	GCCCATCTTCTGGCTGCTG	Hepatocellular carcinoma
ZNF135_c.1684A>G_p.I562V	ZNF135_c.1684A>G_p.I562V_2	TCATTCAGCATCAGAGGAT	Non small cell carcinoma
ZNF135_c.1684A>G_p.I562V	ZNF135_c.1684A>G_p.I562V_3	CTCATTCAGCATCAGAGGA	Non small cell carcinoma
ZNF135_c.1684A>G_p.I562V	ZNF135_c.1684A>G_p.I562V_5	CCCTCATTCAGCATCAGAG	Non small cell carcinoma
ZNF135_c.1684A>G_p.I562V	ZNF135_c.1684A>G_p.I562V_6	CCCCTCATTCAGCATCAGA	Non small cell carcinoma
ZNF135_c.1684A>G_p.I562V	ZNF135_c.1684A>G_p.I562V_4	CCTCATTCAGCATCAGAGG	Non small cell carcinoma
ZNF8_c.1154T>C_p.F385S	ZNF8_c.1154T>C_p.F385S_2	GGAAAAGGCAAGTGGTCCG	Hepatocellular carcinoma
ZNF8_c.1154T>C_p.F385S	ZNF8_c.1154T>C_p.F385S_3	AGGAAAAGGCAAGTGGTCC	Hepatocellular carcinoma
ZNF8_c.1154T>C_p.F385S	ZNF8_c.1154T>C_p.F385S_4	CAGGAAAAGGCAAGTGGTC	Hepatocellular carcinoma
ZNF8_c.1154T>C_p.F385S	ZNF8_c.1154T>C_p.F385S_5	GCAGGAAAAGGCAAGTGGT	Hepatocellular carcinoma
ZNF8_c.1154T>C_p.F385S	ZNF8_c.1154T>C_p.F385S_6	TGCAGGAAAAGGCAAGTGG	Hepatocellular carcinoma
HNRNPM_c.737T>C_p.I246T	HNRNPM_c.737T>C_p.I246T_3	CCTATTCCACGACTTTTTC	Small cell carcinoma
HNRNPM_c.737T>C_p.I246T	HNRNPM_c.737T>C_p.I246T_4	GCCTATTCCACGACTTTTT	Small cell carcinoma
HNRNPM_c.737T>C_p.I246T	HNRNPM_c.737T>C_p.I246T_5	TGCCTATTCCACGACTTTT	Small cell carcinoma
HNRNPM_c.737T>C_p.I246T	HNRNPM_c.737T>C_p.I246T_6	GTGCCTATTCCACGACTTT	Small cell carcinoma
HNRNPM_c.737T>C_p.I246T	HNRNPM_c.737T>C_p.I246T_2	CTATTCCACGACTTTTTCC	Small cell carcinoma
MUC16_c.40780A>G_p.N13594D	MUC16_c.40780A>G_p.N13594D_3	GTCAATGGTGAGTAGTTGT	Non small cell carcinoma
MUC16_c.40780A>G_p.N13594D	MUC16_c.40780A>G_p.N13594D_4	TGTCAATGGTGAGTAGTTG	Non small cell carcinoma
MUC16_c.40780A>G_p.N13594D	MUC16_c.40780A>G_p.N13594D_5	ATGTCAATGGTGAGTAGTT	Non small cell carcinoma
MUC16_c.40780A>G_p.N13594D	MUC16_c.40780A>G_p.N13594D_2	TCAATGGTGAGTAGTTGTG	Non small cell carcinoma
MUC16_c.40780A>G_p.N13594D	MUC16_c.40780A>G_p.N13594D_6	TATGTCAATGGTGAGTAGT	Non small cell carcinoma
MUC16_c.40729A>G_p.S13577G	MUC16_c.40729A>G_p.S13577G_6	ACCCACAGCATCACTGAGC	Non small cell carcinoma
MUC16_c.40729A>G_p.S13577G	MUC16_c.40729A>G_p.S13577G_2	ACAGCATCACTGAGCTGGG	Non small cell carcinoma
MUC16_c.40729A>G_p.S13577G	MUC16_c.40729A>G_p.S13577G_3	CACAGCATCACTGAGCTGG	Non small cell carcinoma
MUC16_c.40729A>G_p.S13577G	MUC16_c.40729A>G_p.S13577G_4	CCACAGCATCACTGAGCTG	Non small cell carcinoma
MUC16_c.40729A>G_p.S13577G	MUC16_c.40729A>G_p.S13577G_5	CCCACAGCATCACTGAGCT	Non small cell carcinoma
MUC16_c.10756A>G_p.T3586A	MUC16_c.10756A>G_p.T3586A_3	TCCACAGCTGCATCAGATT	Hepatocellular carcinoma
MUC16_c.10756A>G_p.T3586A	MUC16_c.10756A>G_p.T3586A_4	TTCCACAGCTGCATCAGAT	Hepatocellular carcinoma
MUC16_c.10756A>G_p.T3586A	MUC16_c.10756A>G_p.T3586A_5	CTTCCACAGCTGCATCAGA	Hepatocellular carcinoma
MUC16_c.10756A>G_p.T3586A	MUC16_c.10756A>G_p.T3586A_2	CCACAGCTGCATCAGATTC	Hepatocellular carcinoma
MUC16_c.10756A>G_p.T3586A	MUC16_c.10756A>G_p.T3586A_6	TCTTCCACAGCTGCATCAG	Hepatocellular carcinoma
OR7D4_c.71A>G_p.Q24R	OR7D4_c.71A>G_p.Q24R_2	GCAGCCCGTCCTCTTTGGG	BRCA_HER-positive carcinoma
OR7D4_c.71A>G_p.Q24R	OR7D4_c.71A>G_p.Q24R_3	TGCAGCCCGTCCTCTTTGG	BRCA_HER-positive carcinoma
OR7D4_c.71A>G_p.Q24R	OR7D4_c.71A>G_p.Q24R_4	CTGCAGCCCGTCCTCTTTG	BRCA_HER-positive carcinoma
OR7D4_c.71A>G_p.Q24R	OR7D4_c.71A>G_p.Q24R_5	ACTGCAGCCCGTCCTCTTT	BRCA_HER-positive carcinoma
OR7D4_c.71A>G_p.Q24R	OR7D4_c.71A>G_p.Q24R_6	AACTGCAGCCCGTCCTCTT	BRCA_HER-positive carcinoma
TGFBRAP1_c.418A>G_p.I140V	TGFBRAP1_c.418A>G_p.I140V_2	GCATCATCTCTGTCAAACG	Hepatocellular carcinoma
TGFBRAP1_c.418A>G_p.I140V	TGFBRAP1_c.418A>G_p.I140V_3	TGCATCATCTCTGTCAAAC	Hepatocellular carcinoma
TGFBRAP1_c.418A>G_p.I140V	TGFBRAP1_c.418A>G_p.I140V_5	TTTGCATCATCTCTGTCAA	Hepatocellular carcinoma
TGFBRAP1_c.418A>G_p.I140V	TGFBRAP1_c.418A>G_p.I140V_6	GTTTGCATCATCTCTGTCA	Hepatocellular carcinoma
TGFBRAP1_c.418A>G_p.I140V	TGFBRAP1_c.418A>G_p.I140V_4	TTGCATCATCTCTGTCAAA	Hepatocellular carcinoma
MYO7B_c.4580A>G_p.D1527G	MYO7B_c.4580A>G_p.D1527G_2	GGACCTGTTGGTCCTCACA	Small cell carcinoma
MYO7B_c.4580A>G_p.D1527G	MYO7B_c.4580A>G_p.D1527G_3	GGGACCTGTTGGTCCTCAC	Small cell carcinoma
MYO7B_c.4580A>G_p.D1527G	MYO7B_c.4580A>G_p.D1527G_5	GGGGGACCTGTTGGTCCTC	Small cell carcinoma
MYO7B_c.4580A>G_p.D1527G	MYO7B_c.4580A>G_p.D1527G_6	AGGGGGACCTGTTGGTCCT	Small cell carcinoma
MYO7B_c.4580A>G_p.D1527G	MYO7B_c.4580A>G_p.D1527G_4	GGGGACCTGTTGGTCCTCA	Small cell carcinoma
MAP3K19_c.1697A>G_p.K566R	MAP3K19_c.1697A>G_p.K566R_2	TAAAACCAGCATAAAAACA	BRCA_HER-positive carcinoma
MAP3K19_c.1697A>G_p.K566R	MAP3K19_c.1697A>G_p.K566R_3	ATAAAACCAGCATAAAAAC	BRCA_HER-positive carcinoma
MAP3K19_c.1697A>G_p.K566R	MAP3K19_c.1697A>G_p.K566R_4	CATAAAACCAGCATAAAAA	BRCA_HER-positive carcinoma
MAP3K19_c.1697A>G_p.K566R	MAP3K19_c.1697A>G_p.K566R_5	GCATAAAACCAGCATAAAA	BRCA_HER-positive carcinoma
MAP3K19_c.1697A>G_p.K566R	MAP3K19_c.1697A>G_p.K566R_6	TGCATAAAACCAGCATAAA	BRCA_HER-positive carcinoma
COBLL1_c.871A>G_p.I291V	COBLL1_c.871A>G_p.I291V_3	CAAATATCACAAAACCTAG	BRCA_HER-positive carcinoma
COBLL1_c.871A>G_p.I291V	COBLL1_c.871A>G_p.I291V_4	CCAAATATCACAAAACCTA	BRCA_HER-positive carcinoma
COBLL1_c.871A>G_p.I291V	COBLL1_c.871A>G_p.I291V_5	GCCAAATATCACAAAACCT	BRCA_HER-positive carcinoma
COBLL1_c.871A>G_p.I291V	COBLL1_c.871A>G_p.I291V_6	TGCCAAATATCACAAAACC	BRCA_HER-positive carcinoma
COBLL1_c.871A>G_p.I291V	COBLL1_c.871A>G_p.I291V_2	AAATATCACAAAACCTAGA	BRCA_HER-positive carcinoma
XIRP2_c.5228T>C_p.V1743A	XIRP2_c.5228T>C_p.V1743A_3	TGAACATTTCCTCTCTCAG	BRCA_HER-positive carcinoma
XIRP2_c.5228T>C_p.V1743A	XIRP2_c.5228T>C_p.V1743A_4	CTGAACATTTCCTCTCTCA	BRCA_HER-positive carcinoma
XIRP2_c.5228T>C_p.V1743A	XIRP2_c.5228T>C_p.V1743A_5	ACTGAACATTTCCTCTCTC	BRCA_HER-positive carcinoma
XIRP2_c.5228T>C_p.V1743A	XIRP2_c.5228T>C_p.V1743A_2	GAACATTTCCTCTCTCAGA	BRCA_HER-positive carcinoma
XIRP2_c.5228T>C_p.V1743A	XIRP2_c.5228T>C_p.V1743A_6	AACTGAACATTTCCTCTCT	BRCA_HER-positive carcinoma
DYNC1I2_c.143A>G_p.Q48R	DYNC1I2_c.143A>G_p.Q48R_6	CTGTGCAAGAAGAATCAGA	BRCA_HER-positive carcinoma
DYNC1I2_c.143A>G_p.Q48R	DYNC1I2_c.143A>G_p.Q48R_2	GCAAGAAGAATCAGATCTT	BRCA_HER-positive carcinoma
DYNC1I2_c.143A>G_p.Q48R	DYNC1I2_c.143A>G_p.Q48R_3	TGCAAGAAGAATCAGATCT	BRCA_HER-positive carcinoma
DYNC1I2_c.143A>G_p.Q48R	DYNC1I2_c.143A>G_p.Q48R_4	GTGCAAGAAGAATCAGATC	BRCA_HER-positive carcinoma
DYNC1I2_c.143A>G_p.Q48R	DYNC1I2_c.143A>G_p.Q48R_5	TGTGCAAGAAGAATCAGAT	BRCA_HER-positive carcinoma
DLX2_c.830T>C_p.L277P	DLX2_c.830T>C_p.L277P_4	GCCCAGAAAAGCCGAGGCC	Hepatocellular carcinoma
DLX2_c.830T>C_p.L277P	DLX2_c.830T>C_p.L277P_5	TGCCCAGAAAAGCCGAGGC	Hepatocellular carcinoma
DLX2_c.830T>C_p.L277P	DLX2_c.830T>C_p.L277P_6	TTGCCCAGAAAAGCCGAGG	Hepatocellular carcinoma
DLX2_c.830T>C_p.L277P	DLX2_c.830T>C_p.L277P_3	CCCAGAAAAGCCGAGGCCG	Hepatocellular carcinoma
DLX2_c.830T>C_p.L277P	DLX2_c.830T>C_p.L277P_2	CCAGAAAAGCCGAGGCCGC	Hepatocellular carcinoma
EVX2_c.80A>G_p.N27S	EVX2_c.80A>G_p.N27S_4	TCCAATTTGTCCAACTCGG	BRCA_HER-positive carcinoma
EVX2_c.80A>G_p.N27S	EVX2_c.80A>G_p.N27S_5	CTCCAATTTGTCCAACTCG	BRCA_HER-positive carcinoma
EVX2_c.80A>G_p.N27S	EVX2_c.80A>G_p.N27S_2	CAATTTGTCCAACTCGGCT	BRCA_HER-positive carcinoma
EVX2_c.80A>G_p.N27S	EVX2_c.80A>G_p.N27S_3	CCAATTTGTCCAACTCGGC	BRCA_HER-positive carcinoma
EVX2_c.80A>G_p.N27S	EVX2_c.80A>G_p.N27S_6	TCTCCAATTTGTCCAACTC	BRCA_HER-positive carcinoma
NFE2L2_c.197A>G_p.E66G	NFE2L2_c.197A>G_p.E66G_2	TGAATTTCTCCCAATTCAG	Hepatocellular carcinoma
NFE2L2_c.197A>G_p.E66G	NFE2L2_c.197A>G_p.E66G_3	GTGAATTTCTCCCAATTCA	Hepatocellular carcinoma
NFE2L2_c.197A>G_p.E66G	NFE2L2_c.197A>G_p.E66G_4	GGTGAATTTCTCCCAATTC	Hepatocellular carcinoma
NFE2L2_c.197A>G_p.E66G	NFE2L2_c.197A>G_p.E66G_6	CAGGTGAATTTCTCCCAAT	Hepatocellular carcinoma
NFE2L2_c.197A>G_p.E66G	NFE2L2_c.197A>G_p.E66G_5	AGGTGAATTTCTCCCAATT	Hepatocellular carcinoma
NFE2L2_c.167A>G_p.K56R	NFE2L2_c.167A>G_p.K56R_3	AAAAGGAAAGACAAGAACA	Hepatocellular carcinoma
NFE2L2_c.167A>G_p.K56R	NFE2L2_c.167A>G_p.K56R_4	GAAAAGGAAAGACAAGAAC	Hepatocellular carcinoma
NFE2L2_c.167A>G_p.K56R	NFE2L2_c.167A>G_p.K56R_2	AAAGGAAAGACAAGAACAA	Hepatocellular carcinoma
NFE2L2_c.167A>G_p.K56R	NFE2L2_c.167A>G_p.K56R_5	TGAAAAGGAAAGACAAGAA	Hepatocellular carcinoma
NFE2L2_c.167A>G_p.K56R	NFE2L2_c.167A>G_p.K56R_6	TTGAAAAGGAAAGACAAGA	Hepatocellular carcinoma
NFE2L2_c.38A>G_p.D13G	NFE2L2_c.38A>G_p.D13G_2	AGATCTTGGAGTAAGTCGA	Hepatocellular carcinoma
NFE2L2_c.38A>G_p.D13G	NFE2L2_c.38A>G_p.D13G_3	TAGATCTTGGAGTAAGTCG	Hepatocellular carcinoma
NFE2L2_c.38A>G_p.D13G	NFE2L2_c.38A>G_p.D13G_5	TATAGATCTTGGAGTAAGT	Hepatocellular carcinoma
NFE2L2_c.38A>G_p.D13G	NFE2L2_c.38A>G_p.D13G_6	ATATAGATCTTGGAGTAAG	Hepatocellular carcinoma
NFE2L2_c.38A>G_p.D13G	NFE2L2_c.38A>G_p.D13G_4	ATAGATCTTGGAGTAAGTC	Hepatocellular carcinoma
FSIP2_c.3361A>G_p.I1121V	FSIP2_c.3361A>G_p.I1121V_2	ACATATCTTCCGTTCCTTT	Hepatocellular carcinoma
FSIP2_c.3361A>G_p.I1121V	FSIP2_c.3361A>G_p.I1121V_5	AGGACATATCTTCCGTTCC	Hepatocellular carcinoma
FSIP2_c.3361A>G_p.I1121V	FSIP2_c.3361A>G_p.I1121V_6	AAGGACATATCTTCCGTTC	Hepatocellular carcinoma
FSIP2_c.3361A>G_p.I1121V	FSIP2_c.3361A>G_p.I1121V_3	GACATATCTTCCGTTCCTT	Hepatocellular carcinoma
FSIP2_c.3361A>G_p.I1121V	FSIP2_c.3361A>G_p.I1121V_4	GGACATATCTTCCGTTCCT	Hepatocellular carcinoma
SF3B1_c.2098A>G_p.K700E	SF3B1_c.2098A>G_p.K700E_2	AGAAAGTTCGGACCATCAG	BRCA_Ductal carcinoma
SF3B1_c.2098A>G_p.K700E	SF3B1_c.2098A>G_p.K700E_5	AGCAGAAAGTTCGGACCAT	BRCA_Ductal carcinoma
SF3B1_c.2098A>G_p.K700E	SF3B1_c.2098A>G_p.K700E_6	CAGCAGAAAGTTCGGACCA	BRCA_Ductal carcinoma
SF3B1_c.2098A>G_p.K700E	SF3B1_c.2098A>G_p.K700E_3	CAGAAAGTTCGGACCATCA	BRCA_Ductal carcinoma
SF3B1_c.2098A>G_p.K700E	SF3B1_c.2098A>G_p.K700E_4	GCAGAAAGTTCGGACCATC	BRCA_Ductal carcinoma
PLCL1_c.1733A>G_p.Q578R	PLCL1_c.1733A>G_p.Q578R_6	AGAAGCAAATCCGACTCTG	Hepatocellular carcinoma
PLCL1_c.1733A>G_p.Q578R	PLCL1_c.1733A>G_p.Q578R_2	GCAAATCCGACTCTGTAGG	Hepatocellular carcinoma
PLCL1_c.1733A>G_p.Q578R	PLCL1_c.1733A>G_p.Q578R_3	AGCAAATCCGACTCTGTAG	Hepatocellular carcinoma
PLCL1_c.1733A>G_p.Q578R	PLCL1_c.1733A>G_p.Q578R_4	AAGCAAATCCGACTCTGTA	Hepatocellular carcinoma
PLCL1_c.1733A>G_p.Q578R	PLCL1_c.1733A>G_p.Q578R_5	GAAGCAAATCCGACTCTGT	Hepatocellular carcinoma
CPS1_c.2419A>G_p.I807V	CPS1_c.2419A>G_p.I807V_3	GCTATTGGTCGTACCTTTG	Hepatocellular carcinoma
CPS1_c.2419A>G_p.I807V	CPS1_c.2419A>G_p.I807V_4	GGCTATTGGTCGTACCTTT	Hepatocellular carcinoma
CPS1_c.2419A>G_p.I807V	CPS1_c.2419A>G_p.I807V_5	TGGCTATTGGTCGTACCTT	Hepatocellular carcinoma
CPS1_c.2419A>G_p.I807V	CPS1_c.2419A>G_p.I807V_6	ATGGCTATTGGTCGTACCT	Hepatocellular carcinoma
CPS1_c.2419A>G_p.I807V	CPS1_c.2419A>G_p.I807V_2	CTATTGGTCGTACCTTTGA	Hepatocellular carcinoma
TDRD15_c.1464A>G_p.I488M	TDRD15_c.1464A>G_p.I488M_3	TATAGCATATGTATTAAAC	Hepatocellular carcinoma
TDRD15_c.1464A>G_p.I488M	TDRD15_c.1464A>G_p.I488M_4	TTATAGCATATGTATTAAA	Hepatocellular carcinoma
TDRD15_c.1464A>G_p.I488M	TDRD15_c.1464A>G_p.I488M_5	TTTATAGCATATGTATTAA	Hepatocellular carcinoma
TDRD15_c.1464A>G_p.I488M	TDRD15_c.1464A>G_p.I488M_2	ATAGCATATGTATTAAACC	Hepatocellular carcinoma
TDRD15_c.1464A>G_p.I488M	TDRD15_c.1464A>G_p.I488M_6	TTTTATAGCATATGTATTA	Hepatocellular carcinoma
TTLL4_c.601A>G_p.I201V	TTLL4_c.601A>G_p.I201V_2	CCATCTCAGGGAAGATCCC	Hepatocellular carcinoma
TTLL4_c.601A>G_p.I201V	TTLL4_c.601A>G_p.I201V_3	GCCATCTCAGGGAAGATCC	Hepatocellular carcinoma
TTLL4_c.601A>G_p.I201V	TTLL4_c.601A>G_p.I201V_4	TGCCATCTCAGGGAAGATC	Hepatocellular carcinoma
TTLL4_c.601A>G_p.I201V	TTLL4_c.601A>G_p.I201V_6	TCTGCCATCTCAGGGAAGA	Hepatocellular carcinoma
TTLL4_c.601A>G_p.I201V	TTLL4_c.601A>G_p.I201V_5	CTGCCATCTCAGGGAAGAT	Hepatocellular carcinoma
KLHL29_c.202A>G_p.T68A	KLHL29_c.202A>G_p.T68A_2	CTACAGCTCCTGCTCCCTG	Hepatocellular carcinoma
KLHL29_c.202A>G_p.T68A	KLHL29_c.202A>G_p.T68A_3	GCTACAGCTCCTGCTCCCT	Hepatocellular carcinoma
KLHL29_c.202A>G_p.T68A	KLHL29_c.202A>G_p.T68A_4	GGCTACAGCTCCTGCTCCC	Hepatocellular carcinoma
KLHL29_c.202A>G_p.T68A	KLHL29_c.202A>G_p.T68A_6	CCGGCTACAGCTCCTGCTC	Hepatocellular carcinoma
KLHL29_c.202A>G_p.T68A	KLHL29_c.202A>G_p.T68A_5	CGGCTACAGCTCCTGCTCC	Hepatocellular carcinoma
ESPNL_c.254A>G_p.E85G	ESPNL_c.254A>G_p.E85G_2	CGAGCTGTGCTGGCTGGTC	Hepatocellular carcinoma
ESPNL_c.254A>G_p.E85G	ESPNL_c.254A>G_p.E85G_3	CCGAGCTGTGCTGGCTGGT	Hepatocellular carcinoma
ESPNL_c.254A>G_p.E85G	ESPNL_c.254A>G_p.E85G_4	GCCGAGCTGTGCTGGCTGG	Hepatocellular carcinoma
ESPNL_c.254A>G_p.E85G	ESPNL_c.254A>G_p.E85G_5	GGCCGAGCTGTGCTGGCTG	Hepatocellular carcinoma
ESPNL_c.254A>G_p.E85G	ESPNL_c.254A>G_p.E85G_6	TGGCCGAGCTGTGCTGGCT	Hepatocellular carcinoma
C2orf16_c.5275T>C_p.C1759R	C2orf16_c.5275T>C_p.C1759R_2	GCAATGGCTTCTCTCAGAG	Hepatocellular carcinoma
C2orf16_c.5275T>C_p.C1759R	C2orf16_c.5275T>C_p.C1759R_4	CTGCAATGGCTTCTCTCAG	Hepatocellular carcinoma
C2orf16_c.5275T>C_p.C1759R	C2orf16_c.5275T>C_p.C1759R_5	ACTGCAATGGCTTCTCTCA	Hepatocellular carcinoma
C2orf16_c.5275T>C_p.C1759R	C2orf16_c.5275T>C_p.C1759R_6	GACTGCAATGGCTTCTCTC	Hepatocellular carcinoma
C2orf16_c.5275T>C_p.C1759R	C2orf16_c.5275T>C_p.C1759R_3	TGCAATGGCTTCTCTCAGA	Hepatocellular carcinoma
RASGRP3_c.979A>G_p.I327V	RASGRP3_c.979A>G_p.I327V_2	ACATTGTGAAAATGCACCA	BRCA_HER-positive carcinoma
RASGRP3_c.979A>G_p.I327V	RASGRP3_c.979A>G_p.I327V_4	GAACATTGTGAAAATGCAC	BRCA_HER-positive carcinoma
RASGRP3_c.979A>G_p.I327V	RASGRP3_c.979A>G_p.I327V_5	TGAACATTGTGAAAATGCA	BRCA_HER-positive carcinoma
RASGRP3_c.979A>G_p.I327V	RASGRP3_c.979A>G_p.I327V_6	GTGAACATTGTGAAAATGC	BRCA_HER-positive carcinoma
RASGRP3_c.979A>G_p.I327V	RASGRP3_c.979A>G_p.I327V_3	AACATTGTGAAAATGCACC	BRCA_HER-positive carcinoma
ABCG8_c.1073A>G_p.D358G	ABCG8_c.1073A>G_p.D358G_6	TAGATGACTTTCTATGGAA	Hepatocellular carcinoma
ABCG8_c.1073A>G_p.D358G	ABCG8_c.1073A>G_p.D358G_2	TGACTTTCTATGGAAAGCA	Hepatocellular carcinoma
ABCG8_c.1073A>G_p.D358G	ABCG8_c.1073A>G_p.D358G_3	ATGACTTTCTATGGAAAGC	Hepatocellular carcinoma
ABCG8_c.1073A>G_p.D358G	ABCG8_c.1073A>G_p.D358G_4	GATGACTTTCTATGGAAAG	Hepatocellular carcinoma
ABCG8_c.1073A>G_p.D358G	ABCG8_c.1073A>G_p.D358G_5	AGATGACTTTCTATGGAAA	Hepatocellular carcinoma
PPM1B_c.101T>C_p.V34A	PPM1B_c.101T>C_p.V34A_3	TCCACTCTCCATCCTTGCA	BRCA_HER-positive carcinoma
PPM1B_c.101T>C_p.V34A	PPM1B_c.101T>C_p.V34A_4	TTCCACTCTCCATCCTTGC	BRCA_HER-positive carcinoma
PPM1B_c.101T>C_p.V34A	PPM1B_c.101T>C_p.V34A_5	TTTCCACTCTCCATCCTTG	BRCA_HER-positive carcinoma
PPM1B_c.101T>C_p.V34A	PPM1B_c.101T>C_p.V34A_6	ATTTCCACTCTCCATCCTT	BRCA_HER-positive carcinoma
PPM1B_c.101T>C_p.V34A	PPM1B_c.101T>C_p.V34A_2	CCACTCTCCATCCTTGCAT	BRCA_HER-positive carcinoma
SRBD1_c.1960A>G_p.S654G	SRBD1_c.1960A>G_p.S654G_3	AGAAGTGCAGGTAAGAAAC	Hepatocellular carcinoma
SRBD1_c.1960A>G_p.S654G	SRBD1_c.1960A>G_p.S654G_4	GAGAAGTGCAGGTAAGAAA	Hepatocellular carcinoma
SRBD1_c.1960A>G_p.S654G	SRBD1_c.1960A>G_p.S654G_5	TGAGAAGTGCAGGTAAGAA	Hepatocellular carcinoma
SRBD1_c.1960A>G_p.S654G	SRBD1_c.1960A>G_p.S654G_2	GAAGTGCAGGTAAGAAACT	Hepatocellular carcinoma
SRBD1_c.1960A>G_p.S654G	SRBD1_c.1960A>G_p.S654G_6	TTGAGAAGTGCAGGTAAGA	Hepatocellular carcinoma
TIA1_c.953A>G_p.Q318R	TIA1_c.953A>G_p.Q318R_2	ACAAATTGGCCAGTATATG	Non small cell carcinoma
TIA1_c.953A>G_p.Q318R	TIA1_c.953A>G_p.Q318R_3	AACAAATTGGCCAGTATAT	Non small cell carcinoma
TIA1_c.953A>G_p.Q318R	TIA1_c.953A>G_p.Q318R_4	CAACAAATTGGCCAGTATA	Non small cell carcinoma
TIA1_c.953A>G_p.Q318R	TIA1_c.953A>G_p.Q318R_6	CACAACAAATTGGCCAGTA	Non small cell carcinoma
TIA1_c.953A>G_p.Q318R	TIA1_c.953A>G_p.Q318R_5	ACAACAAATTGGCCAGTAT	Non small cell carcinoma
NAGK_c.13A>G_p.T5A	NAGK_c.13A>G_p.T5A_2	GCACAGGGAGTCAGCTGGC	Hepatocellular carcinoma
NAGK_c.13A>G_p.T5A	NAGK_c.13A>G_p.T5A_3	CGCACAGGGAGTCAGCTGG	Hepatocellular carcinoma
NAGK_c.13A>G_p.T5A	NAGK_c.13A>G_p.T5A_4	GCGCACAGGGAGTCAGCTG	Hepatocellular carcinoma
NAGK_c.13A>G_p.T5A	NAGK_c.13A>G_p.T5A_6	ACGCGCACAGGGAGTCAGC	Hepatocellular carcinoma
NAGK_c.13A>G_p.T5A	NAGK_c.13A>G_p.T5A_5	CGCGCACAGGGAGTCAGCT	Hepatocellular carcinoma
DYSF_c.5822T>C_p.I1941T	DYSF_c.5822T>C_p.I1941T_2	GGATTTTGCTCTCAGTCTT	BRCA_HER-positive carcinoma
DYSF_c.5822T>C_p.I1941T	DYSF_c.5822T>C_p.I1941T_3	GGGATTTTGCTCTCAGTCT	BRCA_HER-positive carcinoma
DYSF_c.5822T>C_p.I1941T	DYSF_c.5822T>C_p.I1941T_4	TGGGATTTTGCTCTCAGTC	BRCA_HER-positive carcinoma
DYSF_c.5822T>C_p.I1941T	DYSF_c.5822T>C_p.I1941T_5	CTGGGATTTTGCTCTCAGT	BRCA_HER-positive carcinoma
DYSF_c.5822T>C_p.I1941T	DYSF_c.5822T>C_p.I1941T_6	GCTGGGATTTTGCTCTCAG	BRCA_HER-positive carcinoma
ALMS1_c.12064A>G_p.R4022G	ALMS1_c.12064A>G_p.R4022G_2	GCAGAGAGGCTGGCAGAGA	Hepatocellular carcinoma
ALMS1_c.12064A>G_p.R4022G	ALMS1_c.12064A>G_p.R4022G_4	AGGCAGAGAGGCTGGCAGA	Hepatocellular carcinoma
ALMS1_c.12064A>G_p.R4022G	ALMS1_c.12064A>G_p.R4022G_5	CAGGCAGAGAGGCTGGCAG	Hepatocellular carcinoma
ALMS1_c.12064A>G_p.R4022G	ALMS1_c.12064A>G_p.R4022G_6	CCAGGCAGAGAGGCTGGCA	Hepatocellular carcinoma
ALMS1_c.12064A>G_p.R4022G	ALMS1_c.12064A>G_p.R4022G_3	GGCAGAGAGGCTGGCAGAG	Hepatocellular carcinoma
TACR1_c.1045T>C_p.Y349H	TACR1_c.1045T>C_p.Y349H_2	GTACACACTGCCCTGGGTC	Hepatocellular carcinoma
TACR1_c.1045T>C_p.Y349H	TACR1_c.1045T>C_p.Y349H_4	TTGTACACACTGCCCTGGG	Hepatocellular carcinoma
TACR1_c.1045T>C_p.Y349H	TACR1_c.1045T>C_p.Y349H_5	TTTGTACACACTGCCCTGG	Hepatocellular carcinoma
TACR1_c.1045T>C_p.Y349H	TACR1_c.1045T>C_p.Y349H_6	CTTTGTACACACTGCCCTG	Hepatocellular carcinoma
TACR1_c.1045T>C_p.Y349H	TACR1_c.1045T>C_p.Y349H_3	TGTACACACTGCCCTGGGT	Hepatocellular carcinoma
TEX37_c.487A>G_p.I163V	TEX37_c.487A>G_p.I163V_6	TGCCATATAGTCAAGGTCC	Hepatocellular carcinoma
TEX37_c.487A>G_p.I163V	TEX37_c.487A>G_p.I163V_2	ATATAGTCAAGGTCCCCAT	Hepatocellular carcinoma
TEX37_c.487A>G_p.I163V	TEX37_c.487A>G_p.I163V_3	CATATAGTCAAGGTCCCCA	Hepatocellular carcinoma
TEX37_c.487A>G_p.I163V	TEX37_c.487A>G_p.I163V_4	CCATATAGTCAAGGTCCCC	Hepatocellular carcinoma
TEX37_c.487A>G_p.I163V	TEX37_c.487A>G_p.I163V_5	GCCATATAGTCAAGGTCCC	Hepatocellular carcinoma
DUSP2_c.796A>G_p.T266A	DUSP2_c.796A>G_p.T266A_5	CTGCCACCATCTGTCTGGC	Hepatocellular carcinoma
DUSP2_c.796A>G_p.T266A	DUSP2_c.796A>G_p.T266A_6	TCTGCCACCATCTGTCTGG	Hepatocellular carcinoma
DUSP2_c.796A>G_p.T266A	DUSP2_c.796A>G_p.T266A_3	GCCACCATCTGTCTGGCAT	Hepatocellular carcinoma
DUSP2_c.796A>G_p.T266A	DUSP2_c.796A>G_p.T266A_4	TGCCACCATCTGTCTGGCA	Hepatocellular carcinoma
DUSP2_c.796A>G_p.T266A	DUSP2_c.796A>G_p.T266A_2	CCACCATCTGTCTGGCATA	Hepatocellular carcinoma
FKBP1A_c.283A>G_p.M95V	FKBP1A_c.283A>G_p.M95V_3	GACATGTGCACATGAATCC	BRCA_HER-positive carcinoma
FKBP1A_c.283A>G_p.M95V	FKBP1A_c.283A>G_p.M95V_2	ACATGTGCACATGAATCCA	BRCA_HER-positive carcinoma
FKBP1A_c.283A>G_p.M95V	FKBP1A_c.283A>G_p.M95V_4	AGACATGTGCACATGAATC	BRCA_HER-positive carcinoma
FKBP1A_c.283A>G_p.M95V	FKBP1A_c.283A>G_p.M95V_5	CAGACATGTGCACATGAAT	BRCA_HER-positive carcinoma
FKBP1A_c.283A>G_p.M95V	FKBP1A_c.283A>G_p.M95V_6	CCAGACATGTGCACATGAA	BRCA_HER-positive carcinoma
SYNDIG1_c.488A>G_p.Y163C	SYNDIG1_c.488A>G_p.Y163C_2	CTACTCAAGCGACACAGAG	BRCA_HER-positive carcinoma
SYNDIG1_c.488A>G_p.Y163C	SYNDIG1_c.488A>G_p.Y163C_5	CGACTACTCAAGCGACACA	BRCA_HER-positive carcinoma
SYNDIG1_c.488A>G_p.Y163C	SYNDIG1_c.488A>G_p.Y163C_6	GCGACTACTCAAGCGACAC	BRCA_HER-positive carcinoma
SYNDIG1_c.488A>G_p.Y163C	SYNDIG1_c.488A>G_p.Y163C_3	ACTACTCAAGCGACACAGA	BRCA_HER-positive carcinoma
SYNDIG1_c.488A>G_p.Y163C	SYNDIG1_c.488A>G_p.Y163C_4	GACTACTCAAGCGACACAG	BRCA_HER-positive carcinoma
SNRPB_c.115A>G_p.N39D	SNRPB_c.115A>G_p.N39D_5	ACATGAATTTGATCCTCTG	BRCA_HER-positive carcinoma
SNRPB_c.115A>G_p.N39D	SNRPB_c.115A>G_p.N39D_6	CACATGAATTTGATCCTCT	BRCA_HER-positive carcinoma
SNRPB_c.115A>G_p.N39D	SNRPB_c.115A>G_p.N39D_2	TGAATTTGATCCTCTGTGA	BRCA_HER-positive carcinoma
SNRPB_c.115A>G_p.N39D	SNRPB_c.115A>G_p.N39D_3	ATGAATTTGATCCTCTGTG	BRCA_HER-positive carcinoma
SNRPB_c.115A>G_p.N39D	SNRPB_c.115A>G_p.N39D_4	CATGAATTTGATCCTCTGT	BRCA_HER-positive carcinoma
RALGAPB_c.1055T>C_p.I352T	RALGAPB_c.1055T>C_p.I352T_5	TAGAAATACCTTAAAAAAA	Small cell carcinoma
RALGAPB_c.1055T>C_p.I352T	RALGAPB_c.1055T>C_p.I352T_2	AAATACCTTAAAAAAAAAA	Small cell carcinoma
RALGAPB_c.1055T>C_p.I352T	RALGAPB_c.1055T>C_p.I352T_3	GAAATACCTTAAAAAAAAA	Small cell carcinoma
RALGAPB_c.1055T>C_p.I352T	RALGAPB_c.1055T>C_p.I352T_4	AGAAATACCTTAAAAAAAA	Small cell carcinoma
RALGAPB_c.1055T>C_p.I352T	RALGAPB_c.1055T>C_p.I352T_6	CTAGAAATACCTTAAAAAA	Small cell carcinoma
MAVS_c.26A>G_p.Y9C	MAVS_c.26A>G_p.Y9C_3	CCTATAAGTATATCTGCCG	Hepatocellular carcinoma
MAVS_c.26A>G_p.Y9C	MAVS_c.26A>G_p.Y9C_4	ACCTATAAGTATATCTGCC	Hepatocellular carcinoma
MAVS_c.26A>G_p.Y9C	MAVS_c.26A>G_p.Y9C_2	CTATAAGTATATCTGCCGC	Hepatocellular carcinoma
MAVS_c.26A>G_p.Y9C	MAVS_c.26A>G_p.Y9C_5	GACCTATAAGTATATCTGC	Hepatocellular carcinoma
MAVS_c.26A>G_p.Y9C	MAVS_c.26A>G_p.Y9C_6	AGACCTATAAGTATATCTG	Hepatocellular carcinoma
PTPRT_c.1034A>G_p.Y345C	PTPRT_c.1034A>G_p.Y345C_3	ACTATAAGCTGTGGCATCT	Non small cell carcinoma
PTPRT_c.1034A>G_p.Y345C	PTPRT_c.1034A>G_p.Y345C_4	AACTATAAGCTGTGGCATC	Non small cell carcinoma
PTPRT_c.1034A>G_p.Y345C	PTPRT_c.1034A>G_p.Y345C_2	CTATAAGCTGTGGCATCTG	Non small cell carcinoma
PTPRT_c.1034A>G_p.Y345C	PTPRT_c.1034A>G_p.Y345C_5	CAACTATAAGCTGTGGCAT	Non small cell carcinoma
PTPRT_c.1034A>G_p.Y345C	PTPRT_c.1034A>G_p.Y345C_6	CCAACTATAAGCTGTGGCA	Non small cell carcinoma
SDC4_c.34T>C_p.F12L	SDC4_c.34T>C_p.F12L_3	AGAACAGCAGCAGCGCGAA	Hepatocellular carcinoma
SDC4_c.34T>C_p.F12L	SDC4_c.34T>C_p.F12L_2	GAACAGCAGCAGCGCGAAC	Hepatocellular carcinoma
SDC4_c.34T>C_p.F12L	SDC4_c.34T>C_p.F12L_6	CGAAGAACAGCAGCAGCGC	Hepatocellular carcinoma
SDC4_c.34T>C_p.F12L	SDC4_c.34T>C_p.F12L_4	AAGAACAGCAGCAGCGCGA	Hepatocellular carcinoma
SDC4_c.34T>C_p.F12L	SDC4_c.34T>C_p.F12L_5	GAAGAACAGCAGCAGCGCG	Hepatocellular carcinoma
PLTP_c.1250T>C_p.M417T	PLTP_c.1250T>C_p.M417T_4	CAGCATGGTCTTCAGAGGG	Hepatocellular carcinoma
PLTP_c.1250T>C_p.M417T	PLTP_c.1250T>C_p.M417T_3	AGCATGGTCTTCAGAGGGG	Hepatocellular carcinoma
PLTP_c.1250T>C_p.M417T	PLTP_c.1250T>C_p.M417T_2	GCATGGTCTTCAGAGGGGC	Hepatocellular carcinoma
PLTP_c.1250T>C_p.M417T	PLTP_c.1250T>C_p.M417T_5	GCAGCATGGTCTTCAGAGG	Hepatocellular carcinoma
PLTP_c.1250T>C_p.M417T	PLTP_c.1250T>C_p.M417T_6	TGCAGCATGGTCTTCAGAG	Hepatocellular carcinoma
NFATC2_c.2548A>G_p.S850G	NFATC2_c.2548A>G_p.S850G_2	TCAGTCAAGGTCAGAGGCT	Hepatocellular carcinoma
NFATC2_c.2548A>G_p.S850G	NFATC2_c.2548A>G_p.S850G_3	GTCAGTCAAGGTCAGAGGC	Hepatocellular carcinoma
NFATC2_c.2548A>G_p.S850G	NFATC2_c.2548A>G_p.S850G_4	GGTCAGTCAAGGTCAGAGG	Hepatocellular carcinoma
NFATC2_c.2548A>G_p.S850G	NFATC2_c.2548A>G_p.S850G_5	CGGTCAGTCAAGGTCAGAG	Hepatocellular carcinoma
NFATC2_c.2548A>G_p.S850G	NFATC2_c.2548A>G_p.S850G_6	CCGGTCAGTCAAGGTCAGA	Hepatocellular carcinoma
FERMT1_c.1825A>G_p.I609V	FERMT1_c.1825A>G_p.I609V_2	ATATCAAACAGTGGAATGT	Hepatocellular carcinoma
FERMT1_c.1825A>G_p.I609V	FERMT1_c.1825A>G_p.I609V_6	ACAAATATCAAACAGTGGA	Hepatocellular carcinoma
FERMT1_c.1825A>G_p.I609V	FERMT1_c.1825A>G_p.I609V_3	AATATCAAACAGTGGAATG	Hepatocellular carcinoma
FERMT1_c.1825A>G_p.I609V	FERMT1_c.1825A>G_p.I609V_4	AAATATCAAACAGTGGAAT	Hepatocellular carcinoma
FERMT1_c.1825A>G_p.I609V	FERMT1_c.1825A>G_p.I609V_5	CAAATATCAAACAGTGGAA	Hepatocellular carcinoma
HELZ2_c.1655A>G_p.Y552C	HELZ2_c.1655A>G_p.Y552C_2	CTACACGCTGGCCATGGCC	Hepatocellular carcinoma
HELZ2_c.1655A>G_p.Y552C	HELZ2_c.1655A>G_p.Y552C_3	CCTACACGCTGGCCATGGC	Hepatocellular carcinoma
HELZ2_c.1655A>G_p.Y552C	HELZ2_c.1655A>G_p.Y552C_4	ACCTACACGCTGGCCATGG	Hepatocellular carcinoma
HELZ2_c.1655A>G_p.Y552C	HELZ2_c.1655A>G_p.Y552C_5	GACCTACACGCTGGCCATG	Hepatocellular carcinoma
HELZ2_c.1655A>G_p.Y552C	HELZ2_c.1655A>G_p.Y552C_6	AGACCTACACGCTGGCCAT	Hepatocellular carcinoma
ARFRP1_c.5A>G_p.Y2C	ARFRP1_c.5A>G_p.Y2C_2	GTACACGCTGCTGTCGGGC	BRCA_HER-positive carcinoma
ARFRP1_c.5A>G_p.Y2C	ARFRP1_c.5A>G_p.Y2C_3	TGTACACGCTGCTGTCGGG	BRCA_HER-positive carcinoma
ARFRP1_c.5A>G_p.Y2C	ARFRP1_c.5A>G_p.Y2C_4	ATGTACACGCTGCTGTCGG	BRCA_HER-positive carcinoma
ARFRP1_c.5A>G_p.Y2C	ARFRP1_c.5A>G_p.Y2C_5	GATGTACACGCTGCTGTCG	BRCA_HER-positive carcinoma
ARFRP1_c.5A>G_p.Y2C	ARFRP1_c.5A>G_p.Y2C_6	GGATGTACACGCTGCTGTC	BRCA_HER-positive carcinoma
SAMSN1_c.1222T>C_p.C408R	SAMSN1_c.1222T>C_p.C408R_5	ATAGCAACCAGAGTCCCTT	Hepatocellular carcinoma
SAMSN1_c.1222T>C_p.C408R	SAMSN1_c.1222T>C_p.C408R_2	GCAACCAGAGTCCCTTGGG	Hepatocellular carcinoma
SAMSN1_c.1222T>C_p.C408R	SAMSN1_c.1222T>C_p.C408R_3	AGCAACCAGAGTCCCTTGG	Hepatocellular carcinoma
SAMSN1_c.1222T>C_p.C408R	SAMSN1_c.1222T>C_p.C408R_4	TAGCAACCAGAGTCCCTTG	Hepatocellular carcinoma
SAMSN1_c.1222T>C_p.C408R	SAMSN1_c.1222T>C_p.C408R_6	TATAGCAACCAGAGTCCCT	Hepatocellular carcinoma
C21orf91_c.701A>G_p.N234S	C21orf91_c.701A>G_p.N234S_2	GAATGCAAAGCTCCTACAG	Hepatocellular carcinoma
C21orf91_c.701A>G_p.N234S	C21orf91_c.701A>G_p.N234S_3	TGAATGCAAAGCTCCTACA	Hepatocellular carcinoma
C21orf91_c.701A>G_p.N234S	C21orf91_c.701A>G_p.N234S_4	CTGAATGCAAAGCTCCTAC	Hepatocellular carcinoma
C21orf91_c.701A>G_p.N234S	C21orf91_c.701A>G_p.N234S_5	ACTGAATGCAAAGCTCCTA	Hepatocellular carcinoma
C21orf91_c.701A>G_p.N234S	C21orf91_c.701A>G_p.N234S_6	AACTGAATGCAAAGCTCCT	Hepatocellular carcinoma
SYNJ1_c.685A>G_p.R229G	SYNJ1_c.685A>G_p.R229G_2	TCAGAACAATTTATGCTGC	Hepatocellular carcinoma
SYNJ1_c.685A>G_p.R229G	SYNJ1_c.685A>G_p.R229G_3	ATCAGAACAATTTATGCTG	Hepatocellular carcinoma
SYNJ1_c.685A>G_p.R229G	SYNJ1_c.685A>G_p.R229G_6	GAAATCAGAACAATTTATG	Hepatocellular carcinoma
SYNJ1_c.685A>G_p.R229G	SYNJ1_c.685A>G_p.R229G_4	AATCAGAACAATTTATGCT	Hepatocellular carcinoma
SYNJ1_c.685A>G_p.R229G	SYNJ1_c.685A>G_p.R229G_5	AAATCAGAACAATTTATGC	Hepatocellular carcinoma
TTC3_c.476A>G_p.E159G	TTC3_c.476A>G_p.E159G_4	ATAGAAAATGTAAGTGTTA	Small cell carcinoma
TTC3_c.476A>G_p.E159G	TTC3_c.476A>G_p.E159G_3	TAGAAAATGTAAGTGTTAA	Small cell carcinoma
TTC3_c.476A>G_p.E159G	TTC3_c.476A>G_p.E159G_2	AGAAAATGTAAGTGTTAAA	Small cell carcinoma
TTC3_c.476A>G_p.E159G	TTC3_c.476A>G_p.E159G_5	AATAGAAAATGTAAGTGTT	Small cell carcinoma
TTC3_c.476A>G_p.E159G	TTC3_c.476A>G_p.E159G_6	AAATAGAAAATGTAAGTGT	Small cell carcinoma
CDC45_c.1082T>C_p.F361S	CDC45_c.1082T>C_p.F361S_2	GGAACTTCTGCTTCACCTG	Hepatocellular carcinoma
CDC45_c.1082T>C_p.F361S	CDC45_c.1082T>C_p.F361S_3	TGGAACTTCTGCTTCACCT	Hepatocellular carcinoma
CDC45_c.1082T>C_p.F361S	CDC45_c.1082T>C_p.F361S_4	CTGGAACTTCTGCTTCACC	Hepatocellular carcinoma
CDC45_c.1082T>C_p.F361S	CDC45_c.1082T>C_p.F361S_5	CCTGGAACTTCTGCTTCAC	Hepatocellular carcinoma
CDC45_c.1082T>C_p.F361S	CDC45_c.1082T>C_p.F361S_6	GCCTGGAACTTCTGCTTCA	Hepatocellular carcinoma
SEC14L2_c.136A>G_p.S46G	SEC14L2_c.136A>G_p.S46G_2	GAAGCTTCGACCTGCAGAA	Hepatocellular carcinoma
SEC14L2_c.136A>G_p.S46G	SEC14L2_c.136A>G_p.S46G_6	GCCAGAAGCTTCGACCTGC	Hepatocellular carcinoma
SEC14L2_c.136A>G_p.S46G	SEC14L2_c.136A>G_p.S46G_3	AGAAGCTTCGACCTGCAGA	Hepatocellular carcinoma
SEC14L2_c.136A>G_p.S46G	SEC14L2_c.136A>G_p.S46G_4	CAGAAGCTTCGACCTGCAG	Hepatocellular carcinoma
SEC14L2_c.136A>G_p.S46G	SEC14L2_c.136A>G_p.S46G_5	CCAGAAGCTTCGACCTGCA	Hepatocellular carcinoma
SLC35E4_c.190T>C_p.S64P	SLC35E4_c.190T>C_p.S64P_2	TGACATGCTGGCTCCCGCC	BRCA_HER-positive carcinoma
SLC35E4_c.190T>C_p.S64P	SLC35E4_c.190T>C_p.S64P_3	TTGACATGCTGGCTCCCGC	BRCA_HER-positive carcinoma
SLC35E4_c.190T>C_p.S64P	SLC35E4_c.190T>C_p.S64P_4	CTTGACATGCTGGCTCCCG	BRCA_HER-positive carcinoma
SLC35E4_c.190T>C_p.S64P	SLC35E4_c.190T>C_p.S64P_5	GCTTGACATGCTGGCTCCC	BRCA_HER-positive carcinoma
SLC35E4_c.190T>C_p.S64P	SLC35E4_c.190T>C_p.S64P_6	GGCTTGACATGCTGGCTCC	BRCA_HER-positive carcinoma
C22orf42_c.422T>C_p.V141A	C22orf42_c.422T>C_p.V141A_2	ACACCTGCACATCTTCAGT	Non small cell carcinoma
C22orf42_c.422T>C_p.V141A	C22orf42_c.422T>C_p.V141A_3	GACACCTGCACATCTTCAG	Non small cell carcinoma
C22orf42_c.422T>C_p.V141A	C22orf42_c.422T>C_p.V141A_4	AGACACCTGCACATCTTCA	Non small cell carcinoma
C22orf42_c.422T>C_p.V141A	C22orf42_c.422T>C_p.V141A_5	CAGACACCTGCACATCTTC	Non small cell carcinoma
C22orf42_c.422T>C_p.V141A	C22orf42_c.422T>C_p.V141A_6	GCAGACACCTGCACATCTT	Non small cell carcinoma
CBX6_c.1193T>C_p.V398A	CBX6_c.1193T>C_p.V398A_5	CTGCTACCCCAGCAGCCAC	Hepatocellular carcinoma
CBX6_c.1193T>C_p.V398A	CBX6_c.1193T>C_p.V398A_2	CTACCCCAGCAGCCACCTT	Hepatocellular carcinoma
CBX6_c.1193T>C_p.V398A	CBX6_c.1193T>C_p.V398A_3	GCTACCCCAGCAGCCACCT	Hepatocellular carcinoma
CBX6_c.1193T>C_p.V398A	CBX6_c.1193T>C_p.V398A_4	TGCTACCCCAGCAGCCACC	Hepatocellular carcinoma
CBX6_c.1193T>C_p.V398A	CBX6_c.1193T>C_p.V398A_6	CCTGCTACCCCAGCAGCCA	Hepatocellular carcinoma
EP300_c.4241A>G_p.Y1414C	EP300_c.4241A>G_p.Y1414C_2	CTATCATGAAATCCTAATT	Small cell carcinoma
EP300_c.4241A>G_p.Y1414C	EP300_c.4241A>G_p.Y1414C_3	TCTATCATGAAATCCTAAT	Small cell carcinoma
EP300_c.4241A>G_p.Y1414C	EP300_c.4241A>G_p.Y1414C_4	GTCTATCATGAAATCCTAA	Small cell carcinoma
EP300_c.4241A>G_p.Y1414C	EP300_c.4241A>G_p.Y1414C_5	AGTCTATCATGAAATCCTA	Small cell carcinoma
EP300_c.4241A>G_p.Y1414C	EP300_c.4241A>G_p.Y1414C_6	CAGTCTATCATGAAATCCT	Small cell carcinoma
EP300_c.7114A>G_p.M2372V	EP300_c.7114A>G_p.M2372V_2	CAATGCTTTCTCAGCTTGC	Non small cell carcinoma
EP300_c.7114A>G_p.M2372V	EP300_c.7114A>G_p.M2372V_3	TCAATGCTTTCTCAGCTTG	Non small cell carcinoma
EP300_c.7114A>G_p.M2372V	EP300_c.7114A>G_p.M2372V_6	AATTCAATGCTTTCTCAGC	Non small cell carcinoma
EP300_c.7114A>G_p.M2372V	EP300_c.7114A>G_p.M2372V_4	TTCAATGCTTTCTCAGCTT	Non small cell carcinoma
EP300_c.7114A>G_p.M2372V	EP300_c.7114A>G_p.M2372V_5	ATTCAATGCTTTCTCAGCT	Non small cell carcinoma
TUBGCP6_c.3613A>G_p.M1205V	TUBGCP6_c.3613A>G_p.M1205V_5	CAGACATGGCTCCCACCCG	Hepatocellular carcinoma
TUBGCP6_c.3613A>G_p.M1205V	TUBGCP6_c.3613A>G_p.M1205V_4	AGACATGGCTCCCACCCGG	Hepatocellular carcinoma
TUBGCP6_c.3613A>G_p.M1205V	TUBGCP6_c.3613A>G_p.M1205V_2	ACATGGCTCCCACCCGGCC	Hepatocellular carcinoma
TUBGCP6_c.3613A>G_p.M1205V	TUBGCP6_c.3613A>G_p.M1205V_6	TCAGACATGGCTCCCACCC	Hepatocellular carcinoma
TUBGCP6_c.3613A>G_p.M1205V	TUBGCP6_c.3613A>G_p.M1205V_3	GACATGGCTCCCACCCGGC	Hepatocellular carcinoma
CPT1B_c.2258A>G_p.H753R	CPT1B_c.2258A>G_p.H753R_2	CCACATCCGCAAAGCCCTG	Hepatocellular carcinoma
CPT1B_c.2258A>G_p.H753R	CPT1B_c.2258A>G_p.H753R_3	ACCACATCCGCAAAGCCCT	Hepatocellular carcinoma
CPT1B_c.2258A>G_p.H753R	CPT1B_c.2258A>G_p.H753R_4	AACCACATCCGCAAAGCCC	Hepatocellular carcinoma
CPT1B_c.2258A>G_p.H753R	CPT1B_c.2258A>G_p.H753R_6	GAAACCACATCCGCAAAGC	Hepatocellular carcinoma
CPT1B_c.2258A>G_p.H753R	CPT1B_c.2258A>G_p.H753R_5	AAACCACATCCGCAAAGCC	Hepatocellular carcinoma
MORC1_c.2345A>G_p.E782G	MORC1_c.2345A>G_p.E782G_2	GGAAGATGTGAATCTAAGT	BRCA_HER-positive carcinoma
MORC1_c.2345A>G_p.E782G	MORC1_c.2345A>G_p.E782G_3	TGGAAGATGTGAATCTAAG	BRCA_HER-positive carcinoma
MORC1_c.2345A>G_p.E782G	MORC1_c.2345A>G_p.E782G_4	ATGGAAGATGTGAATCTAA	BRCA_HER-positive carcinoma
MORC1_c.2345A>G_p.E782G	MORC1_c.2345A>G_p.E782G_5	GATGGAAGATGTGAATCTA	BRCA_HER-positive carcinoma
MORC1_c.2345A>G_p.E782G	MORC1_c.2345A>G_p.E782G_6	CGATGGAAGATGTGAATCT	BRCA_HER-positive carcinoma
USF3_c.572A>G_p.N191S	USF3_c.572A>G_p.N191S_2	CAATCTTGTGACTCCTGTA	BRCA_HER-positive carcinoma
USF3_c.572A>G_p.N191S	USF3_c.572A>G_p.N191S_4	TGCAATCTTGTGACTCCTG	BRCA_HER-positive carcinoma
USF3_c.572A>G_p.N191S	USF3_c.572A>G_p.N191S_5	TTGCAATCTTGTGACTCCT	BRCA_HER-positive carcinoma
USF3_c.572A>G_p.N191S	USF3_c.572A>G_p.N191S_6	CTTGCAATCTTGTGACTCC	BRCA_HER-positive carcinoma
USF3_c.572A>G_p.N191S	USF3_c.572A>G_p.N191S_3	GCAATCTTGTGACTCCTGT	BRCA_HER-positive carcinoma
OSBPL11_c.713T>C_p.I238T	OSBPL11_c.713T>C_p.I238T_2	CAATTCGTCTAATTAAGTC	BRCA_HER-positive carcinoma
OSBPL11_c.713T>C_p.I238T	OSBPL11_c.713T>C_p.I238T_4	TTCAATTCGTCTAATTAAG	BRCA_HER-positive carcinoma
OSBPL11_c.713T>C_p.I238T	OSBPL11_c.713T>C_p.I238T_5	ATTCAATTCGTCTAATTAA	BRCA_HER-positive carcinoma
OSBPL11_c.713T>C_p.I238T	OSBPL11_c.713T>C_p.I238T_6	CATTCAATTCGTCTAATTA	BRCA_HER-positive carcinoma
OSBPL11_c.713T>C_p.I238T	OSBPL11_c.713T>C_p.I238T_3	TCAATTCGTCTAATTAAGT	BRCA_HER-positive carcinoma
DBR1_c.1486A>G_p.T496A	DBR1_c.1486A>G_p.T496A_2	GGACTGTGGAGTCAGGGAA	Hepatocellular carcinoma
DBR1_c.1486A>G_p.T496A	DBR1_c.1486A>G_p.T496A_3	GGGACTGTGGAGTCAGGGA	Hepatocellular carcinoma
DBR1_c.1486A>G_p.T496A	DBR1_c.1486A>G_p.T496A_4	TGGGACTGTGGAGTCAGGG	Hepatocellular carcinoma
DBR1_c.1486A>G_p.T496A	DBR1_c.1486A>G_p.T496A_5	GTGGGACTGTGGAGTCAGG	Hepatocellular carcinoma
DBR1_c.1486A>G_p.T496A	DBR1_c.1486A>G_p.T496A_6	GGTGGGACTGTGGAGTCAG	Hepatocellular carcinoma
ESYT3_c.1625T>C_p.M542T	ESYT3_c.1625T>C_p.M542T_3	AGCATTCCCAGAGCACACT	Hepatocellular carcinoma
ESYT3_c.1625T>C_p.M542T	ESYT3_c.1625T>C_p.M542T_4	CAGCATTCCCAGAGCACAC	Hepatocellular carcinoma
ESYT3_c.1625T>C_p.M542T	ESYT3_c.1625T>C_p.M542T_5	CCAGCATTCCCAGAGCACA	Hepatocellular carcinoma
ESYT3_c.1625T>C_p.M542T	ESYT3_c.1625T>C_p.M542T_2	GCATTCCCAGAGCACACTC	Hepatocellular carcinoma
ESYT3_c.1625T>C_p.M542T	ESYT3_c.1625T>C_p.M542T_6	TCCAGCATTCCCAGAGCAC	Hepatocellular carcinoma
PIK3CA_c.331A>G_p.K111E	PIK3CA_c.331A>G_p.K111E_2	AAAAGATCCTCAATCGAGA	CRC_Adenocarcinoma
PIK3CA_c.331A>G_p.K111E	PIK3CA_c.331A>G_p.K111E_3	GAAAAGATCCTCAATCGAG	CRC_Adenocarcinoma
PIK3CA_c.331A>G_p.K111E	PIK3CA_c.331A>G_p.K111E_4	AGAAAAGATCCTCAATCGA	CRC_Adenocarcinoma
PIK3CA_c.331A>G_p.K111E	PIK3CA_c.331A>G_p.K111E_5	AAGAAAAGATCCTCAATCG	CRC_Adenocarcinoma
PIK3CA_c.331A>G_p.K111E	PIK3CA_c.331A>G_p.K111E_6	GAAGAAAAGATCCTCAATC	CRC_Adenocarcinoma
PIK3CA_c.1258T>C_p.C420R	PIK3CA_c.1258T>C_p.C420R_4	GGACAGTGTTCCTTAAAAA	CRC_Adenocarcinoma, BRCA_Ductal carcinoma, BRCA_HER-positive carcinoma
PIK3CA_c.1258T>C_p.C420R	PIK3CA_c.1258T>C_p.C420R_5	TGGACAGTGTTCCTTAAAA	CRC_Adenocarcinoma, BRCA_Ductal carcinoma, BRCA_HER-positive carcinoma
PIK3CA_c.1258T>C_p.C420R	PIK3CA_c.1258T>C_p.C420R_2	ACAGTGTTCCTTAAAAAAC	CRC_Adenocarcinoma, BRCA_Ductal carcinoma, BRCA_HER-positive carcinoma
PIK3CA_c.1258T>C_p.C420R	PIK3CA_c.1258T>C_p.C420R_3	GACAGTGTTCCTTAAAAAA	CRC_Adenocarcinoma, BRCA_Ductal carcinoma, BRCA_HER-positive carcinoma
PIK3CA_c.1258T>C_p.C420R	PIK3CA_c.1258T>C_p.C420R_6	ATGGACAGTGTTCCTTAAA	CRC_Adenocarcinoma, BRCA_Ductal carcinoma, BRCA_HER-positive carcinoma
PIK3CA_c.1634A>G_p.E545G	PIK3CA_c.1634A>G_p.E545G_2	TGAGCAGGAGAAAGATTTT	CRC_Adenocarcinoma, Hepatocellular carcinoma
PIK3CA_c.1634A>G_p.E545G	PIK3CA_c.1634A>G_p.E545G_3	CTGAGCAGGAGAAAGATTT	CRC_Adenocarcinoma, Hepatocellular carcinoma
PIK3CA_c.1634A>G_p.E545G	PIK3CA_c.1634A>G_p.E545G_4	ACTGAGCAGGAGAAAGATT	CRC_Adenocarcinoma, Hepatocellular carcinoma
PIK3CA_c.1634A>G_p.E545G	PIK3CA_c.1634A>G_p.E545G_5	CACTGAGCAGGAGAAAGAT	CRC_Adenocarcinoma, Hepatocellular carcinoma
PIK3CA_c.1634A>G_p.E545G	PIK3CA_c.1634A>G_p.E545G_6	TCACTGAGCAGGAGAAAGA	CRC_Adenocarcinoma, Hepatocellular carcinoma
PIK3CA_c.3107T>C_p.L1036S	PIK3CA_c.3107T>C_p.L1036S_2	CCAAAGCCTCTTGCTCAGT	Small cell carcinoma
PIK3CA_c.3107T>C_p.L1036S	PIK3CA_c.3107T>C_p.L1036S_3	TCCAAAGCCTCTTGCTCAG	Small cell carcinoma
PIK3CA_c.3107T>C_p.L1036S	PIK3CA_c.3107T>C_p.L1036S_4	CTCCAAAGCCTCTTGCTCA	Small cell carcinoma
PIK3CA_c.3107T>C_p.L1036S	PIK3CA_c.3107T>C_p.L1036S_5	ACTCCAAAGCCTCTTGCTC	Small cell carcinoma
PIK3CA_c.3107T>C_p.L1036S	PIK3CA_c.3107T>C_p.L1036S_6	TACTCCAAAGCCTCTTGCT	Small cell carcinoma
PIK3CA_c.3140A>G_p.H1047R	PIK3CA_c.3140A>G_p.H1047R_3	CACATCATGGTGGCTGGAC	CRC_Adenocarcinoma, Small cell carcinoma, Non small cell carcinoma, Hepatocellular carcinoma, BRCA_NS, BRCA_Basal (triple-negative) carcinoma, BRCA_Luminal A carcinoma, BRCA_Luminal B carcinoma, BRCA_HER-positive carcinoma
PIK3CA_c.3140A>G_p.H1047R	PIK3CA_c.3140A>G_p.H1047R_2	ACATCATGGTGGCTGGACA	CRC_Adenocarcinoma, Small cell carcinoma, Non small cell carcinoma, Hepatocellular carcinoma, BRCA_NS, BRCA_Basal (triple-negative) carcinoma, BRCA_Luminal A carcinoma, BRCA_Luminal B carcinoma, BRCA_HER-positive carcinoma
PIK3CA_c.3140A>G_p.H1047R	PIK3CA_c.3140A>G_p.H1047R_4	GCACATCATGGTGGCTGGA	CRC_Adenocarcinoma, Small cell carcinoma, Non small cell carcinoma, Hepatocellular carcinoma, BRCA_NS, BRCA_Basal (triple-negative) carcinoma, BRCA_Luminal A carcinoma, BRCA_Luminal B carcinoma, BRCA_HER-positive carcinoma
PIK3CA_c.3140A>G_p.H1047R	PIK3CA_c.3140A>G_p.H1047R_5	TGCACATCATGGTGGCTGG	CRC_Adenocarcinoma, Small cell carcinoma, Non small cell carcinoma, Hepatocellular carcinoma, BRCA_NS, BRCA_Basal (triple-negative) carcinoma, BRCA_Luminal A carcinoma, BRCA_Luminal B carcinoma, BRCA_HER-positive carcinoma
PIK3CA_c.3140A>G_p.H1047R	PIK3CA_c.3140A>G_p.H1047R_6	ATGCACATCATGGTGGCTG	CRC_Adenocarcinoma, Small cell carcinoma, Non small cell carcinoma, Hepatocellular carcinoma, BRCA_NS, BRCA_Basal (triple-negative) carcinoma, BRCA_Luminal A carcinoma, BRCA_Luminal B carcinoma, BRCA_HER-positive carcinoma
ABCC5_c.1112A>G_p.Y371C	ABCC5_c.1112A>G_p.Y371C_2	GTATGCCTGGGTCAAAGCA	Hepatocellular carcinoma
ABCC5_c.1112A>G_p.Y371C	ABCC5_c.1112A>G_p.Y371C_3	TGTATGCCTGGGTCAAAGC	Hepatocellular carcinoma
ABCC5_c.1112A>G_p.Y371C	ABCC5_c.1112A>G_p.Y371C_4	ATGTATGCCTGGGTCAAAG	Hepatocellular carcinoma
ABCC5_c.1112A>G_p.Y371C	ABCC5_c.1112A>G_p.Y371C_5	AATGTATGCCTGGGTCAAA	Hepatocellular carcinoma
ABCC5_c.1112A>G_p.Y371C	ABCC5_c.1112A>G_p.Y371C_6	AAATGTATGCCTGGGTCAA	Hepatocellular carcinoma
KNG1_c.447A>G_p.I149M	KNG1_c.447A>G_p.I149M_6	TCCTATATCAACGCAGAGC	Hepatocellular carcinoma
KNG1_c.447A>G_p.I149M	KNG1_c.447A>G_p.I149M_2	ATATCAACGCAGAGCCCAG	Hepatocellular carcinoma
KNG1_c.447A>G_p.I149M	KNG1_c.447A>G_p.I149M_3	TATATCAACGCAGAGCCCA	Hepatocellular carcinoma
KNG1_c.447A>G_p.I149M	KNG1_c.447A>G_p.I149M_4	CTATATCAACGCAGAGCCC	Hepatocellular carcinoma
KNG1_c.447A>G_p.I149M	KNG1_c.447A>G_p.I149M_5	CCTATATCAACGCAGAGCC	Hepatocellular carcinoma
MUC4_c.12703A>G_p.T4235A	MUC4_c.12703A>G_p.T4235A_2	CCACAGGTCACGCCACCCC	Hepatocellular carcinoma
MUC4_c.12703A>G_p.T4235A	MUC4_c.12703A>G_p.T4235A_3	TCCACAGGTCACGCCACCC	Hepatocellular carcinoma
MUC4_c.12703A>G_p.T4235A	MUC4_c.12703A>G_p.T4235A_4	ATCCACAGGTCACGCCACC	Hepatocellular carcinoma
MUC4_c.12703A>G_p.T4235A	MUC4_c.12703A>G_p.T4235A_5	TATCCACAGGTCACGCCAC	Hepatocellular carcinoma
MUC4_c.12703A>G_p.T4235A	MUC4_c.12703A>G_p.T4235A_6	GTATCCACAGGTCACGCCA	Hepatocellular carcinoma
MUC4_c.11368A>G_p.T3790A	MUC4_c.11368A>G_p.T3790A_2	ACACCACCCCTCTTCCTGT	CRC_Adenocarcinoma
MUC4_c.11368A>G_p.T3790A	MUC4_c.11368A>G_p.T3790A_3	GACACCACCCCTCTTCCTG	CRC_Adenocarcinoma
MUC4_c.11368A>G_p.T3790A	MUC4_c.11368A>G_p.T3790A_4	TGACACCACCCCTCTTCCT	CRC_Adenocarcinoma
MUC4_c.11368A>G_p.T3790A	MUC4_c.11368A>G_p.T3790A_5	GTGACACCACCCCTCTTCC	CRC_Adenocarcinoma
MUC4_c.11368A>G_p.T3790A	MUC4_c.11368A>G_p.T3790A_6	GGTGACACCACCCCTCTTC	CRC_Adenocarcinoma
MUC4_c.6478T>C_p.S2160P	MUC4_c.6478T>C_p.S2160P_4	AGAGAGGTGGCGTGACCTG	CRC_Adenocarcinoma
MUC4_c.6478T>C_p.S2160P	MUC4_c.6478T>C_p.S2160P_5	AAGAGAGGTGGCGTGACCT	CRC_Adenocarcinoma
MUC4_c.6478T>C_p.S2160P	MUC4_c.6478T>C_p.S2160P_2	AGAGGTGGCGTGACCTGTG	CRC_Adenocarcinoma
MUC4_c.6478T>C_p.S2160P	MUC4_c.6478T>C_p.S2160P_3	GAGAGGTGGCGTGACCTGT	CRC_Adenocarcinoma
MUC4_c.6478T>C_p.S2160P	MUC4_c.6478T>C_p.S2160P_6	GAAGAGAGGTGGCGTGACC	CRC_Adenocarcinoma
MUC4_c.6458T>C_p.V2153A	MUC4_c.6458T>C_p.V2153A_2	ATACTGAGGAAGTTTCGGT	CRC_Adenocarcinoma
MUC4_c.6458T>C_p.V2153A	MUC4_c.6458T>C_p.V2153A_3	GATACTGAGGAAGTTTCGG	CRC_Adenocarcinoma
MUC4_c.6458T>C_p.V2153A	MUC4_c.6458T>C_p.V2153A_4	GGATACTGAGGAAGTTTCG	CRC_Adenocarcinoma
MUC4_c.6458T>C_p.V2153A	MUC4_c.6458T>C_p.V2153A_5	TGGATACTGAGGAAGTTTC	CRC_Adenocarcinoma
MUC4_c.6458T>C_p.V2153A	MUC4_c.6458T>C_p.V2153A_6	GTGGATACTGAGGAAGTTT	CRC_Adenocarcinoma
RUBCN_c.2332A>G_p.K778E	RUBCN_c.2332A>G_p.K778E_2	CCAAGGACCTGCTCATTAA	Hepatocellular carcinoma
RUBCN_c.2332A>G_p.K778E	RUBCN_c.2332A>G_p.K778E_3	TCCAAGGACCTGCTCATTA	Hepatocellular carcinoma
RUBCN_c.2332A>G_p.K778E	RUBCN_c.2332A>G_p.K778E_4	CTCCAAGGACCTGCTCATT	Hepatocellular carcinoma
RUBCN_c.2332A>G_p.K778E	RUBCN_c.2332A>G_p.K778E_5	TCTCCAAGGACCTGCTCAT	Hepatocellular carcinoma
RUBCN_c.2332A>G_p.K778E	RUBCN_c.2332A>G_p.K778E_6	TTCTCCAAGGACCTGCTCA	Hepatocellular carcinoma
CTNNB1_c.95A>G_p.D32G	CTNNB1_c.95A>G_p.D32G_3	TGGACTCTGGAATCCATTC	Hepatocellular carcinoma, Combined hepatocellular-cholangiocarcinoma
CTNNB1_c.95A>G_p.D32G	CTNNB1_c.95A>G_p.D32G_2	GGACTCTGGAATCCATTCT	Hepatocellular carcinoma, Combined hepatocellular-cholangiocarcinoma
CTNNB1_c.95A>G_p.D32G	CTNNB1_c.95A>G_p.D32G_4	CTGGACTCTGGAATCCATT	Hepatocellular carcinoma, Combined hepatocellular-cholangiocarcinoma
CTNNB1_c.95A>G_p.D32G	CTNNB1_c.95A>G_p.D32G_5	CCTGGACTCTGGAATCCAT	Hepatocellular carcinoma, Combined hepatocellular-cholangiocarcinoma
CTNNB1_c.95A>G_p.D32G	CTNNB1_c.95A>G_p.D32G_6	ACCTGGACTCTGGAATCCA	Hepatocellular carcinoma, Combined hepatocellular-cholangiocarcinoma
CTNNB1_c.97T>C_p.S33P	CTNNB1_c.97T>C_p.S33P_2	AGAGTCCAGGTAAGACTGT	Hepatocellular carcinoma
CTNNB1_c.97T>C_p.S33P	CTNNB1_c.97T>C_p.S33P_3	CAGAGTCCAGGTAAGACTG	Hepatocellular carcinoma
CTNNB1_c.97T>C_p.S33P	CTNNB1_c.97T>C_p.S33P_4	CCAGAGTCCAGGTAAGACT	Hepatocellular carcinoma
CTNNB1_c.97T>C_p.S33P	CTNNB1_c.97T>C_p.S33P_5	TCCAGAGTCCAGGTAAGAC	Hepatocellular carcinoma
CTNNB1_c.97T>C_p.S33P	CTNNB1_c.97T>C_p.S33P_6	TTCCAGAGTCCAGGTAAGA	Hepatocellular carcinoma
CTNNB1_c.107A>G_p.H36R	CTNNB1_c.107A>G_p.H36R_6	GAATCCATTCTGGTGCCAC	Hepatocellular carcinoma
CTNNB1_c.107A>G_p.H36R	CTNNB1_c.107A>G_p.H36R_2	CCATTCTGGTGCCACTACC	Hepatocellular carcinoma
CTNNB1_c.107A>G_p.H36R	CTNNB1_c.107A>G_p.H36R_3	TCCATTCTGGTGCCACTAC	Hepatocellular carcinoma
CTNNB1_c.107A>G_p.H36R	CTNNB1_c.107A>G_p.H36R_4	ATCCATTCTGGTGCCACTA	Hepatocellular carcinoma
CTNNB1_c.107A>G_p.H36R	CTNNB1_c.107A>G_p.H36R_5	AATCCATTCTGGTGCCACT	Hepatocellular carcinoma
CTNNB1_c.109T>C_p.S37P	CTNNB1_c.109T>C_p.S37P_2	AGAATGGATTCCAGAGTCC	Hepatocellular carcinoma
CTNNB1_c.109T>C_p.S37P	CTNNB1_c.109T>C_p.S37P_3	CAGAATGGATTCCAGAGTC	Hepatocellular carcinoma
CTNNB1_c.109T>C_p.S37P	CTNNB1_c.109T>C_p.S37P_4	CCAGAATGGATTCCAGAGT	Hepatocellular carcinoma
CTNNB1_c.109T>C_p.S37P	CTNNB1_c.109T>C_p.S37P_5	ACCAGAATGGATTCCAGAG	Hepatocellular carcinoma
CTNNB1_c.109T>C_p.S37P	CTNNB1_c.109T>C_p.S37P_6	CACCAGAATGGATTCCAGA	Hepatocellular carcinoma
CTNNB1_c.121A>G_p.T41A	CTNNB1_c.121A>G_p.T41A_2	CTACCACAGCTCCTTCTCT	CRC_Adenocarcinoma, Hepatocellular carcinoma
CTNNB1_c.121A>G_p.T41A	CTNNB1_c.121A>G_p.T41A_3	ACTACCACAGCTCCTTCTC	CRC_Adenocarcinoma, Hepatocellular carcinoma
CTNNB1_c.121A>G_p.T41A	CTNNB1_c.121A>G_p.T41A_4	CACTACCACAGCTCCTTCT	CRC_Adenocarcinoma, Hepatocellular carcinoma
CTNNB1_c.121A>G_p.T41A	CTNNB1_c.121A>G_p.T41A_5	CCACTACCACAGCTCCTTC	CRC_Adenocarcinoma, Hepatocellular carcinoma
CTNNB1_c.121A>G_p.T41A	CTNNB1_c.121A>G_p.T41A_6	GCCACTACCACAGCTCCTT	CRC_Adenocarcinoma, Hepatocellular carcinoma
CTNNB1_c.133T>C_p.S45P	CTNNB1_c.133T>C_p.S45P_5	CAGAGAAGGAGCTGTGGTA	Hepatocellular carcinoma
CTNNB1_c.133T>C_p.S45P	CTNNB1_c.133T>C_p.S45P_6	TCAGAGAAGGAGCTGTGGT	Hepatocellular carcinoma
CTNNB1_c.133T>C_p.S45P	CTNNB1_c.133T>C_p.S45P_2	AGAAGGAGCTGTGGTAGTG	Hepatocellular carcinoma
CTNNB1_c.133T>C_p.S45P	CTNNB1_c.133T>C_p.S45P_3	GAGAAGGAGCTGTGGTAGT	Hepatocellular carcinoma
CTNNB1_c.133T>C_p.S45P	CTNNB1_c.133T>C_p.S45P_4	AGAGAAGGAGCTGTGGTAG	Hepatocellular carcinoma
APEH_c.2162A>G_p.N721S	APEH_c.2162A>G_p.N721S_3	TGAATGCTGTGCTCTGGCT	Hepatocellular carcinoma
APEH_c.2162A>G_p.N721S	APEH_c.2162A>G_p.N721S_4	ATGAATGCTGTGCTCTGGC	Hepatocellular carcinoma
APEH_c.2162A>G_p.N721S	APEH_c.2162A>G_p.N721S_5	CATGAATGCTGTGCTCTGG	Hepatocellular carcinoma
APEH_c.2162A>G_p.N721S	APEH_c.2162A>G_p.N721S_2	GAATGCTGTGCTCTGGCTA	Hepatocellular carcinoma
APEH_c.2162A>G_p.N721S	APEH_c.2162A>G_p.N721S_6	TCATGAATGCTGTGCTCTG	Hepatocellular carcinoma
STAB1_c.5042T>C_p.I1681T	STAB1_c.5042T>C_p.I1681T_2	ATATGCTGCCCTGGGGGCG	BRCA_HER-positive carcinoma
STAB1_c.5042T>C_p.I1681T	STAB1_c.5042T>C_p.I1681T_3	TATATGCTGCCCTGGGGGC	BRCA_HER-positive carcinoma
STAB1_c.5042T>C_p.I1681T	STAB1_c.5042T>C_p.I1681T_4	GTATATGCTGCCCTGGGGG	BRCA_HER-positive carcinoma
STAB1_c.5042T>C_p.I1681T	STAB1_c.5042T>C_p.I1681T_5	GGTATATGCTGCCCTGGGG	BRCA_HER-positive carcinoma
STAB1_c.5042T>C_p.I1681T	STAB1_c.5042T>C_p.I1681T_6	AGGTATATGCTGCCCTGGG	BRCA_HER-positive carcinoma
APPL1_c.1813A>G_p.I605V	APPL1_c.1813A>G_p.I605V_2	ATATATTTGAGTCAAACAA	Hepatocellular carcinoma
APPL1_c.1813A>G_p.I605V	APPL1_c.1813A>G_p.I605V_3	TATATATTTGAGTCAAACA	Hepatocellular carcinoma
APPL1_c.1813A>G_p.I605V	APPL1_c.1813A>G_p.I605V_5	GCTATATATTTGAGTCAAA	Hepatocellular carcinoma
APPL1_c.1813A>G_p.I605V	APPL1_c.1813A>G_p.I605V_6	TGCTATATATTTGAGTCAA	Hepatocellular carcinoma
APPL1_c.1813A>G_p.I605V	APPL1_c.1813A>G_p.I605V_4	CTATATATTTGAGTCAAAC	Hepatocellular carcinoma
ARF4_c.104A>G_p.Y35C	ARF4_c.104A>G_p.Y35C_2	GTATAAACTGAAGTTAGGG	Hepatocellular carcinoma
ARF4_c.104A>G_p.Y35C	ARF4_c.104A>G_p.Y35C_3	TGTATAAACTGAAGTTAGG	Hepatocellular carcinoma
ARF4_c.104A>G_p.Y35C	ARF4_c.104A>G_p.Y35C_5	TCTGTATAAACTGAAGTTA	Hepatocellular carcinoma
ARF4_c.104A>G_p.Y35C	ARF4_c.104A>G_p.Y35C_6	TTCTGTATAAACTGAAGTT	Hepatocellular carcinoma
ARF4_c.104A>G_p.Y35C	ARF4_c.104A>G_p.Y35C_4	CTGTATAAACTGAAGTTAG	Hepatocellular carcinoma
FLNB_c.3551A>G_p.N1184S	FLNB_c.3551A>G_p.N1184S_2	GAACAACAAAGATGGCACC	BRCA_HER-positive carcinoma
FLNB_c.3551A>G_p.N1184S	FLNB_c.3551A>G_p.N1184S_3	AGAACAACAAAGATGGCAC	BRCA_HER-positive carcinoma
FLNB_c.3551A>G_p.N1184S	FLNB_c.3551A>G_p.N1184S_4	CAGAACAACAAAGATGGCA	BRCA_HER-positive carcinoma
FLNB_c.3551A>G_p.N1184S	FLNB_c.3551A>G_p.N1184S_5	TCAGAACAACAAAGATGGC	BRCA_HER-positive carcinoma
FLNB_c.3551A>G_p.N1184S	FLNB_c.3551A>G_p.N1184S_6	TTCAGAACAACAAAGATGG	BRCA_HER-positive carcinoma
FLNB_c.5705A>G_p.N1902S	FLNB_c.5705A>G_p.N1902S_3	ACAATAAAGATGGGACATG	Hepatocellular carcinoma
FLNB_c.5705A>G_p.N1902S	FLNB_c.5705A>G_p.N1902S_4	GACAATAAAGATGGGACAT	Hepatocellular carcinoma
FLNB_c.5705A>G_p.N1902S	FLNB_c.5705A>G_p.N1902S_5	TGACAATAAAGATGGGACA	Hepatocellular carcinoma
FLNB_c.5705A>G_p.N1902S	FLNB_c.5705A>G_p.N1902S_6	TTGACAATAAAGATGGGAC	Hepatocellular carcinoma
FLNB_c.5705A>G_p.N1902S	FLNB_c.5705A>G_p.N1902S_2	CAATAAAGATGGGACATGC	Hepatocellular carcinoma
PRICKLE2_c.410T>C_p.I137T	PRICKLE2_c.410T>C_p.I137T_3	TTGATCTGGCCTCCGCACT	Hepatocellular carcinoma
PRICKLE2_c.410T>C_p.I137T	PRICKLE2_c.410T>C_p.I137T_4	ATTGATCTGGCCTCCGCAC	Hepatocellular carcinoma
PRICKLE2_c.410T>C_p.I137T	PRICKLE2_c.410T>C_p.I137T_5	CATTGATCTGGCCTCCGCA	Hepatocellular carcinoma
PRICKLE2_c.410T>C_p.I137T	PRICKLE2_c.410T>C_p.I137T_2	TGATCTGGCCTCCGCACTG	Hepatocellular carcinoma
PRICKLE2_c.410T>C_p.I137T	PRICKLE2_c.410T>C_p.I137T_6	CCATTGATCTGGCCTCCGC	Hepatocellular carcinoma
CRYBG3_c.5910A>G_p.I1970M	CRYBG3_c.5910A>G_p.I1970M_5	GCAATATATGACAAGAGGA	BRCA_HER-positive carcinoma
CRYBG3_c.5910A>G_p.I1970M	CRYBG3_c.5910A>G_p.I1970M_6	TGCAATATATGACAAGAGG	BRCA_HER-positive carcinoma
CRYBG3_c.5910A>G_p.I1970M	CRYBG3_c.5910A>G_p.I1970M_2	ATATATGACAAGAGGAGAG	BRCA_HER-positive carcinoma
CRYBG3_c.5910A>G_p.I1970M	CRYBG3_c.5910A>G_p.I1970M_3	AATATATGACAAGAGGAGA	BRCA_HER-positive carcinoma
CRYBG3_c.5910A>G_p.I1970M	CRYBG3_c.5910A>G_p.I1970M_4	CAATATATGACAAGAGGAG	BRCA_HER-positive carcinoma
RIOX2_c.134T>C_p.L45S	RIOX2_c.134T>C_p.L45S_2	TTAAACTTTCAAAGAGACT	BRCA_HER-positive carcinoma
RIOX2_c.134T>C_p.L45S	RIOX2_c.134T>C_p.L45S_3	ATTAAACTTTCAAAGAGAC	BRCA_HER-positive carcinoma
RIOX2_c.134T>C_p.L45S	RIOX2_c.134T>C_p.L45S_4	GATTAAACTTTCAAAGAGA	BRCA_HER-positive carcinoma
RIOX2_c.134T>C_p.L45S	RIOX2_c.134T>C_p.L45S_5	AGATTAAACTTTCAAAGAG	BRCA_HER-positive carcinoma
RIOX2_c.134T>C_p.L45S	RIOX2_c.134T>C_p.L45S_6	GAGATTAAACTTTCAAAGA	BRCA_HER-positive carcinoma
BANK1_c.1091A>G_p.Q364R	BANK1_c.1091A>G_p.Q364R_2	TCAATGTTCAGGAGCAACC	BRCA_HER-positive carcinoma
BANK1_c.1091A>G_p.Q364R	BANK1_c.1091A>G_p.Q364R_3	TTCAATGTTCAGGAGCAAC	BRCA_HER-positive carcinoma
BANK1_c.1091A>G_p.Q364R	BANK1_c.1091A>G_p.Q364R_4	CTTCAATGTTCAGGAGCAA	BRCA_HER-positive carcinoma
BANK1_c.1091A>G_p.Q364R	BANK1_c.1091A>G_p.Q364R_5	GCTTCAATGTTCAGGAGCA	BRCA_HER-positive carcinoma
BANK1_c.1091A>G_p.Q364R	BANK1_c.1091A>G_p.Q364R_6	TGCTTCAATGTTCAGGAGC	BRCA_HER-positive carcinoma
PABPC4L_c.82A>G_p.R28G	PABPC4L_c.82A>G_p.R28G_4	GTTCAGGAAGTTCAGCACT	Hepatocellular carcinoma
PABPC4L_c.82A>G_p.R28G	PABPC4L_c.82A>G_p.R28G_2	TCAGGAAGTTCAGCACTGT	Hepatocellular carcinoma
PABPC4L_c.82A>G_p.R28G	PABPC4L_c.82A>G_p.R28G_3	TTCAGGAAGTTCAGCACTG	Hepatocellular carcinoma
PABPC4L_c.82A>G_p.R28G	PABPC4L_c.82A>G_p.R28G_5	TGTTCAGGAAGTTCAGCAC	Hepatocellular carcinoma
PABPC4L_c.82A>G_p.R28G	PABPC4L_c.82A>G_p.R28G_6	CTGTTCAGGAAGTTCAGCA	Hepatocellular carcinoma
RNF150_c.539T>C_p.V180A	RNF150_c.539T>C_p.V180A_2	TTACTATCTCCTTCCCTTT	Hepatocellular carcinoma
RNF150_c.539T>C_p.V180A	RNF150_c.539T>C_p.V180A_3	CTTACTATCTCCTTCCCTT	Hepatocellular carcinoma
RNF150_c.539T>C_p.V180A	RNF150_c.539T>C_p.V180A_4	GCTTACTATCTCCTTCCCT	Hepatocellular carcinoma
RNF150_c.539T>C_p.V180A	RNF150_c.539T>C_p.V180A_5	GGCTTACTATCTCCTTCCC	Hepatocellular carcinoma
RNF150_c.539T>C_p.V180A	RNF150_c.539T>C_p.V180A_6	AGGCTTACTATCTCCTTCC	Hepatocellular carcinoma
FGG_c.311T>C_p.M104T	FGG_c.311T>C_p.M104T_2	TCATATCTGTAATATAGGA	Hepatocellular carcinoma
FGG_c.311T>C_p.M104T	FGG_c.311T>C_p.M104T_6	TCTATCATATCTGTAATAT	Hepatocellular carcinoma
FGG_c.311T>C_p.M104T	FGG_c.311T>C_p.M104T_3	ATCATATCTGTAATATAGG	Hepatocellular carcinoma
FGG_c.311T>C_p.M104T	FGG_c.311T>C_p.M104T_4	TATCATATCTGTAATATAG	Hepatocellular carcinoma
FGG_c.311T>C_p.M104T	FGG_c.311T>C_p.M104T_5	CTATCATATCTGTAATATA	Hepatocellular carcinoma
TMEM192_c.719A>G_p.D240G	TMEM192_c.719A>G_p.D240G_2	AGACACCATTGAATACCTG	Hepatocellular carcinoma
TMEM192_c.719A>G_p.D240G	TMEM192_c.719A>G_p.D240G_3	GAGACACCATTGAATACCT	Hepatocellular carcinoma
TMEM192_c.719A>G_p.D240G	TMEM192_c.719A>G_p.D240G_4	GGAGACACCATTGAATACC	Hepatocellular carcinoma
TMEM192_c.719A>G_p.D240G	TMEM192_c.719A>G_p.D240G_5	AGGAGACACCATTGAATAC	Hepatocellular carcinoma
TMEM192_c.719A>G_p.D240G	TMEM192_c.719A>G_p.D240G_6	AAGGAGACACCATTGAATA	Hepatocellular carcinoma
LDB2_c.254T>C_p.I85T	LDB2_c.254T>C_p.I85T_2	GGATGAGGGTCCTGCCGAT	BRCA_HER-positive carcinoma
LDB2_c.254T>C_p.I85T	LDB2_c.254T>C_p.I85T_3	GGGATGAGGGTCCTGCCGA	BRCA_HER-positive carcinoma
LDB2_c.254T>C_p.I85T	LDB2_c.254T>C_p.I85T_4	GGGGATGAGGGTCCTGCCG	BRCA_HER-positive carcinoma
LDB2_c.254T>C_p.I85T	LDB2_c.254T>C_p.I85T_5	GGGGGATGAGGGTCCTGCC	BRCA_HER-positive carcinoma
LDB2_c.254T>C_p.I85T	LDB2_c.254T>C_p.I85T_6	CGGGGGATGAGGGTCCTGC	BRCA_HER-positive carcinoma
SPATA4_c.607A>G_p.M203V	SPATA4_c.607A>G_p.M203V_5	CCAACATGCTGACCAATGA	Hepatocellular carcinoma
SPATA4_c.607A>G_p.M203V	SPATA4_c.607A>G_p.M203V_6	CCCAACATGCTGACCAATG	Hepatocellular carcinoma
SPATA4_c.607A>G_p.M203V	SPATA4_c.607A>G_p.M203V_2	ACATGCTGACCAATGAACT	Hepatocellular carcinoma
SPATA4_c.607A>G_p.M203V	SPATA4_c.607A>G_p.M203V_3	AACATGCTGACCAATGAAC	Hepatocellular carcinoma
SPATA4_c.607A>G_p.M203V	SPATA4_c.607A>G_p.M203V_4	CAACATGCTGACCAATGAA	Hepatocellular carcinoma
FRG1_c.505A>G_p.S169G	FRG1_c.505A>G_p.S169G_2	AAAGTAAAACAGCAGGAGA	Small cell carcinoma
FRG1_c.505A>G_p.S169G	FRG1_c.505A>G_p.S169G_3	AAAAGTAAAACAGCAGGAG	Small cell carcinoma
FRG1_c.505A>G_p.S169G	FRG1_c.505A>G_p.S169G_4	AAAAAGTAAAACAGCAGGA	Small cell carcinoma
FRG1_c.505A>G_p.S169G	FRG1_c.505A>G_p.S169G_5	CAAAAAGTAAAACAGCAGG	Small cell carcinoma
FRG1_c.505A>G_p.S169G	FRG1_c.505A>G_p.S169G_6	GCAAAAAGTAAAACAGCAG	Small cell carcinoma
POLN_c.1504A>G_p.S502G	POLN_c.1504A>G_p.S502G_2	ACAGTCTCCCCAGAACGGG	Non small cell carcinoma
POLN_c.1504A>G_p.S502G	POLN_c.1504A>G_p.S502G_3	AACAGTCTCCCCAGAACGG	Non small cell carcinoma
POLN_c.1504A>G_p.S502G	POLN_c.1504A>G_p.S502G_4	GAACAGTCTCCCCAGAACG	Non small cell carcinoma
POLN_c.1504A>G_p.S502G	POLN_c.1504A>G_p.S502G_5	GGAACAGTCTCCCCAGAAC	Non small cell carcinoma
POLN_c.1504A>G_p.S502G	POLN_c.1504A>G_p.S502G_6	AGGAACAGTCTCCCCAGAA	Non small cell carcinoma
SH3BP2_c.1144A>G_p.T382A	SH3BP2_c.1144A>G_p.T382A_4	GGCCACTGCCACCTCCAGA	BRCA_HER-positive carcinoma
SH3BP2_c.1144A>G_p.T382A	SH3BP2_c.1144A>G_p.T382A_2	CCACTGCCACCTCCAGAAA	BRCA_HER-positive carcinoma
SH3BP2_c.1144A>G_p.T382A	SH3BP2_c.1144A>G_p.T382A_3	GCCACTGCCACCTCCAGAA	BRCA_HER-positive carcinoma
SH3BP2_c.1144A>G_p.T382A	SH3BP2_c.1144A>G_p.T382A_5	TGGCCACTGCCACCTCCAG	BRCA_HER-positive carcinoma
SH3BP2_c.1144A>G_p.T382A	SH3BP2_c.1144A>G_p.T382A_6	ATGGCCACTGCCACCTCCA	BRCA_HER-positive carcinoma
ARAP2_c.4414A>G_p.K1472E	ARAP2_c.4414A>G_p.K1472E_2	ACAAGGATGTGAAGGTATA	Hepatocellular carcinoma
ARAP2_c.4414A>G_p.K1472E	ARAP2_c.4414A>G_p.K1472E_3	TACAAGGATGTGAAGGTAT	Hepatocellular carcinoma
ARAP2_c.4414A>G_p.K1472E	ARAP2_c.4414A>G_p.K1472E_4	TTACAAGGATGTGAAGGTA	Hepatocellular carcinoma
ARAP2_c.4414A>G_p.K1472E	ARAP2_c.4414A>G_p.K1472E_5	TTTACAAGGATGTGAAGGT	Hepatocellular carcinoma
ARAP2_c.4414A>G_p.K1472E	ARAP2_c.4414A>G_p.K1472E_6	CTTTACAAGGATGTGAAGG	Hepatocellular carcinoma
TMEM156_c.4A>G_p.T2A	TMEM156_c.4A>G_p.T2A_2	TGACAAAAACAGCCCTCCT	Small cell carcinoma
TMEM156_c.4A>G_p.T2A	TMEM156_c.4A>G_p.T2A_6	GACATGACAAAAACAGCCC	Small cell carcinoma
TMEM156_c.4A>G_p.T2A	TMEM156_c.4A>G_p.T2A_3	ATGACAAAAACAGCCCTCC	Small cell carcinoma
TMEM156_c.4A>G_p.T2A	TMEM156_c.4A>G_p.T2A_4	CATGACAAAAACAGCCCTC	Small cell carcinoma
TMEM156_c.4A>G_p.T2A	TMEM156_c.4A>G_p.T2A_5	ACATGACAAAAACAGCCCT	Small cell carcinoma
PDS5A_c.47T>C_p.V16A	PDS5A_c.47T>C_p.V16A_2	CGACGCCACAGAGGGCAGT	Hepatocellular carcinoma
PDS5A_c.47T>C_p.V16A	PDS5A_c.47T>C_p.V16A_3	ACGACGCCACAGAGGGCAG	Hepatocellular carcinoma
PDS5A_c.47T>C_p.V16A	PDS5A_c.47T>C_p.V16A_4	CACGACGCCACAGAGGGCA	Hepatocellular carcinoma
PDS5A_c.47T>C_p.V16A	PDS5A_c.47T>C_p.V16A_5	TCACGACGCCACAGAGGGC	Hepatocellular carcinoma
PDS5A_c.47T>C_p.V16A	PDS5A_c.47T>C_p.V16A_6	CTCACGACGCCACAGAGGG	Hepatocellular carcinoma
FRYL_c.6589A>G_p.M2197V	FRYL_c.6589A>G_p.M2197V_2	GTATGCAGCAATCATTACT	Hepatocellular carcinoma
FRYL_c.6589A>G_p.M2197V	FRYL_c.6589A>G_p.M2197V_3	AGTATGCAGCAATCATTAC	Hepatocellular carcinoma
FRYL_c.6589A>G_p.M2197V	FRYL_c.6589A>G_p.M2197V_4	CAGTATGCAGCAATCATTA	Hepatocellular carcinoma
FRYL_c.6589A>G_p.M2197V	FRYL_c.6589A>G_p.M2197V_5	CCAGTATGCAGCAATCATT	Hepatocellular carcinoma
FRYL_c.6589A>G_p.M2197V	FRYL_c.6589A>G_p.M2197V_6	TCCAGTATGCAGCAATCAT	Hepatocellular carcinoma
CWH43_c.490A>G_p.T164A	CWH43_c.490A>G_p.T164A_6	ATAGCCACACTTGATCGTA	Small cell carcinoma
CWH43_c.490A>G_p.T164A	CWH43_c.490A>G_p.T164A_5	TAGCCACACTTGATCGTAT	Small cell carcinoma
CWH43_c.490A>G_p.T164A	CWH43_c.490A>G_p.T164A_2	CCACACTTGATCGTATTGG	Small cell carcinoma
CWH43_c.490A>G_p.T164A	CWH43_c.490A>G_p.T164A_3	GCCACACTTGATCGTATTG	Small cell carcinoma
CWH43_c.490A>G_p.T164A	CWH43_c.490A>G_p.T164A_4	AGCCACACTTGATCGTATT	Small cell carcinoma
KIT_c.1324T>C_p.F442L	KIT_c.1324T>C_p.F442L_4	CAAAAATACCAATCTATTG	Hepatocellular carcinoma
KIT_c.1324T>C_p.F442L	KIT_c.1324T>C_p.F442L_5	ACAAAAATACCAATCTATT	Hepatocellular carcinoma
KIT_c.1324T>C_p.F442L	KIT_c.1324T>C_p.F442L_6	GACAAAAATACCAATCTAT	Hepatocellular carcinoma
KIT_c.1324T>C_p.F442L	KIT_c.1324T>C_p.F442L_3	AAAAATACCAATCTATTGT	Hepatocellular carcinoma
[truncated: 1,454 more rows]

## Sheet: CBE gRNA library information
SNVs	sgRNA_ID	sgRNA_sequence	Histology
KIF1B_c.2887G>A_p.A963T	KIF1B_c.2887G>A_p.A963T_2	AGCCACACGCAGAAATCCC	Small cell carcinoma
KIF1B_c.2887G>A_p.A963T	KIF1B_c.2887G>A_p.A963T_3	CAGCCACACGCAGAAATCC	Small cell carcinoma
KIF1B_c.2887G>A_p.A963T	KIF1B_c.2887G>A_p.A963T_4	ACAGCCACACGCAGAAATC	Small cell carcinoma
KIF1B_c.2887G>A_p.A963T	KIF1B_c.2887G>A_p.A963T_6	GTACAGCCACACGCAGAAA	Small cell carcinoma
KIF1B_c.2887G>A_p.A963T	KIF1B_c.2887G>A_p.A963T_5	TACAGCCACACGCAGAAAT	Small cell carcinoma
AGRN_c.4381C>T_p.R1461W	AGRN_c.4381C>T_p.R1461W_3	TCCCGGCACTGGCGCCGGG	BRCA_HER-positive carcinoma
AGRN_c.4381C>T_p.R1461W	AGRN_c.4381C>T_p.R1461W_4	GTCCCGGCACTGGCGCCGG	BRCA_HER-positive carcinoma
AGRN_c.4381C>T_p.R1461W	AGRN_c.4381C>T_p.R1461W_2	CCCGGCACTGGCGCCGGGG	BRCA_HER-positive carcinoma
AGRN_c.4381C>T_p.R1461W	AGRN_c.4381C>T_p.R1461W_5	TGTCCCGGCACTGGCGCCG	BRCA_HER-positive carcinoma
AGRN_c.4381C>T_p.R1461W	AGRN_c.4381C>T_p.R1461W_6	CTGTCCCGGCACTGGCGCC	BRCA_HER-positive carcinoma
EPS8L3_c.142G>A_p.E48K	EPS8L3_c.142G>A_p.E48K_2	CTCGGGCCCCTGGACTCTC	Hepatocellular carcinoma
EPS8L3_c.142G>A_p.E48K	EPS8L3_c.142G>A_p.E48K_3	CCTCGGGCCCCTGGACTCT	Hepatocellular carcinoma
EPS8L3_c.142G>A_p.E48K	EPS8L3_c.142G>A_p.E48K_6	CATCCTCGGGCCCCTGGAC	Hepatocellular carcinoma
EPS8L3_c.142G>A_p.E48K	EPS8L3_c.142G>A_p.E48K_4	TCCTCGGGCCCCTGGACTC	Hepatocellular carcinoma
EPS8L3_c.142G>A_p.E48K	EPS8L3_c.142G>A_p.E48K_5	ATCCTCGGGCCCCTGGACT	Hepatocellular carcinoma
MASP2_c.259G>A_p.A87T	MASP2_c.259G>A_p.A87T_2	GGCCAGCACCTTGGCCCCC	BRCA_HER-positive carcinoma
MASP2_c.259G>A_p.A87T	MASP2_c.259G>A_p.A87T_5	CGTGGCCAGCACCTTGGCC	BRCA_HER-positive carcinoma
MASP2_c.259G>A_p.A87T	MASP2_c.259G>A_p.A87T_6	GCGTGGCCAGCACCTTGGC	BRCA_HER-positive carcinoma
MASP2_c.259G>A_p.A87T	MASP2_c.259G>A_p.A87T_3	TGGCCAGCACCTTGGCCCC	BRCA_HER-positive carcinoma
MASP2_c.259G>A_p.A87T	MASP2_c.259G>A_p.A87T_4	GTGGCCAGCACCTTGGCCC	BRCA_HER-positive carcinoma
KCNA3_c.50G>A_p.R17H	KCNA3_c.50G>A_p.R17H_2	GGCGGGCTGAGGGCGGCGG	Hepatocellular carcinoma
KCNA3_c.50G>A_p.R17H	KCNA3_c.50G>A_p.R17H_5	GGTGGCGGGCTGAGGGCGG	Hepatocellular carcinoma
KCNA3_c.50G>A_p.R17H	KCNA3_c.50G>A_p.R17H_6	CGGTGGCGGGCTGAGGGCG	Hepatocellular carcinoma
KCNA3_c.50G>A_p.R17H	KCNA3_c.50G>A_p.R17H_3	TGGCGGGCTGAGGGCGGCG	Hepatocellular carcinoma
KCNA3_c.50G>A_p.R17H	KCNA3_c.50G>A_p.R17H_4	GTGGCGGGCTGAGGGCGGC	Hepatocellular carcinoma
MTOR_c.6695C>T_p.T2232I	MTOR_c.6695C>T_p.T2232I_4	TCGACCAACTCGGGCCTCA	Non small cell carcinoma
MTOR_c.6695C>T_p.T2232I	MTOR_c.6695C>T_p.T2232I_5	ATCGACCAACTCGGGCCTC	Non small cell carcinoma
MTOR_c.6695C>T_p.T2232I	MTOR_c.6695C>T_p.T2232I_2	GACCAACTCGGGCCTCATT	Non small cell carcinoma
MTOR_c.6695C>T_p.T2232I	MTOR_c.6695C>T_p.T2232I_3	CGACCAACTCGGGCCTCAT	Non small cell carcinoma
MTOR_c.6695C>T_p.T2232I	MTOR_c.6695C>T_p.T2232I_6	TATCGACCAACTCGGGCCT	Non small cell carcinoma
NRAS_c.35G>A_p.G12D	NRAS_c.35G>A_p.G12D_4	ACCACCTGCTCCAACCACC	CRC_Adenocarcinoma, Non small cell carcinoma
NRAS_c.35G>A_p.G12D	NRAS_c.35G>A_p.G12D_5	CACCACCTGCTCCAACCAC	CRC_Adenocarcinoma, Non small cell carcinoma
NRAS_c.35G>A_p.G12D	NRAS_c.35G>A_p.G12D_6	ACACCACCTGCTCCAACCA	CRC_Adenocarcinoma, Non small cell carcinoma
NRAS_c.35G>A_p.G12D	NRAS_c.35G>A_p.G12D_2	CACCTGCTCCAACCACCAC	CRC_Adenocarcinoma, Non small cell carcinoma
NRAS_c.35G>A_p.G12D	NRAS_c.35G>A_p.G12D_3	CCACCTGCTCCAACCACCA	CRC_Adenocarcinoma, Non small cell carcinoma
NRAS_c.34G>A_p.G12S	NRAS_c.34G>A_p.G12S_5	ACCACCTGCTCCAACCACC	Non small cell carcinoma
NRAS_c.34G>A_p.G12S	NRAS_c.34G>A_p.G12S_2	ACCTGCTCCAACCACCACC	Non small cell carcinoma
NRAS_c.34G>A_p.G12S	NRAS_c.34G>A_p.G12S_3	CACCTGCTCCAACCACCAC	Non small cell carcinoma
NRAS_c.34G>A_p.G12S	NRAS_c.34G>A_p.G12S_4	CCACCTGCTCCAACCACCA	Non small cell carcinoma
NRAS_c.34G>A_p.G12S	NRAS_c.34G>A_p.G12S_6	CACCACCTGCTCCAACCAC	Non small cell carcinoma
NGF_c.445G>A_p.A149T	NGF_c.445G>A_p.A149T_4	GTGGCGGTGGTCTTATCCC	BRCA_HER-positive carcinoma
NGF_c.445G>A_p.A149T	NGF_c.445G>A_p.A149T_2	GGCGGTGGTCTTATCCCCA	BRCA_HER-positive carcinoma
NGF_c.445G>A_p.A149T	NGF_c.445G>A_p.A149T_3	TGGCGGTGGTCTTATCCCC	BRCA_HER-positive carcinoma
NGF_c.445G>A_p.A149T	NGF_c.445G>A_p.A149T_6	CTGTGGCGGTGGTCTTATC	BRCA_HER-positive carcinoma
NGF_c.445G>A_p.A149T	NGF_c.445G>A_p.A149T_5	TGTGGCGGTGGTCTTATCC	BRCA_HER-positive carcinoma
ATP1A1_c.1432G>A_p.V478I	ATP1A1_c.1432G>A_p.V478I_3	CGACGATTTTGGCGTATCT	Small cell carcinoma
ATP1A1_c.1432G>A_p.V478I	ATP1A1_c.1432G>A_p.V478I_4	TCGACGATTTTGGCGTATC	Small cell carcinoma
ATP1A1_c.1432G>A_p.V478I	ATP1A1_c.1432G>A_p.V478I_2	GACGATTTTGGCGTATCTT	Small cell carcinoma
ATP1A1_c.1432G>A_p.V478I	ATP1A1_c.1432G>A_p.V478I_5	CTCGACGATTTTGGCGTAT	Small cell carcinoma
ATP1A1_c.1432G>A_p.V478I	ATP1A1_c.1432G>A_p.V478I_6	TCTCGACGATTTTGGCGTA	Small cell carcinoma
FBXO2_c.529C>T_p.R177C	FBXO2_c.529C>T_p.R177C_2	GTCGCAAAGCACAGGTCAT	BRCA_HER-positive carcinoma
FBXO2_c.529C>T_p.R177C	FBXO2_c.529C>T_p.R177C_3	TGTCGCAAAGCACAGGTCA	BRCA_HER-positive carcinoma
FBXO2_c.529C>T_p.R177C	FBXO2_c.529C>T_p.R177C_6	TGGTGTCGCAAAGCACAGG	BRCA_HER-positive carcinoma
FBXO2_c.529C>T_p.R177C	FBXO2_c.529C>T_p.R177C_4	GTGTCGCAAAGCACAGGTC	BRCA_HER-positive carcinoma
FBXO2_c.529C>T_p.R177C	FBXO2_c.529C>T_p.R177C_5	GGTGTCGCAAAGCACAGGT	BRCA_HER-positive carcinoma
IGSF3_c.2410G>A_p.V804M	IGSF3_c.2410G>A_p.V804M_2	CACGTGGCAGTAGTAGCTG	Hepatocellular carcinoma
IGSF3_c.2410G>A_p.V804M	IGSF3_c.2410G>A_p.V804M_5	CTCCACGTGGCAGTAGTAG	Hepatocellular carcinoma
IGSF3_c.2410G>A_p.V804M	IGSF3_c.2410G>A_p.V804M_6	CCTCCACGTGGCAGTAGTA	Hepatocellular carcinoma
IGSF3_c.2410G>A_p.V804M	IGSF3_c.2410G>A_p.V804M_3	CCACGTGGCAGTAGTAGCT	Hepatocellular carcinoma
IGSF3_c.2410G>A_p.V804M	IGSF3_c.2410G>A_p.V804M_4	TCCACGTGGCAGTAGTAGC	Hepatocellular carcinoma
NOTCH2_c.4750C>T_p.Q1584*	NOTCH2_c.4750C>T_p.Q1584*_2	CCCAGGGGGAACTCATGGT	Non small cell carcinoma
NOTCH2_c.4750C>T_p.Q1584*	NOTCH2_c.4750C>T_p.Q1584*_5	ACTCCCAGGGGGAACTCAT	Non small cell carcinoma
NOTCH2_c.4750C>T_p.Q1584*	NOTCH2_c.4750C>T_p.Q1584*_6	GACTCCCAGGGGGAACTCA	Non small cell carcinoma
NOTCH2_c.4750C>T_p.Q1584*	NOTCH2_c.4750C>T_p.Q1584*_3	TCCCAGGGGGAACTCATGG	Non small cell carcinoma
NOTCH2_c.4750C>T_p.Q1584*	NOTCH2_c.4750C>T_p.Q1584*_4	CTCCCAGGGGGAACTCATG	Non small cell carcinoma
NOTCH2_c.400C>T_p.Q134*	NOTCH2_c.400C>T_p.Q134*_4	CTGTCAAGTCGGGTTTACA	BRCA_HER-positive carcinoma
NOTCH2_c.400C>T_p.Q134*	NOTCH2_c.400C>T_p.Q134*_5	CCTGTCAAGTCGGGTTTAC	BRCA_HER-positive carcinoma
NOTCH2_c.400C>T_p.Q134*	NOTCH2_c.400C>T_p.Q134*_2	GTCAAGTCGGGTTTACAGG	BRCA_HER-positive carcinoma
NOTCH2_c.400C>T_p.Q134*	NOTCH2_c.400C>T_p.Q134*_3	TGTCAAGTCGGGTTTACAG	BRCA_HER-positive carcinoma
NOTCH2_c.400C>T_p.Q134*	NOTCH2_c.400C>T_p.Q134*_6	ACCTGTCAAGTCGGGTTTA	BRCA_HER-positive carcinoma
VPS13D_c.11713G>A_p.E3905K	VPS13D_c.11713G>A_p.E3905K_4	GTCTCGATGACCTCATTCT	BRCA_HER-positive carcinoma
VPS13D_c.11713G>A_p.E3905K	VPS13D_c.11713G>A_p.E3905K_5	GGTCTCGATGACCTCATTC	BRCA_HER-positive carcinoma
VPS13D_c.11713G>A_p.E3905K	VPS13D_c.11713G>A_p.E3905K_6	CGGTCTCGATGACCTCATT	BRCA_HER-positive carcinoma
VPS13D_c.11713G>A_p.E3905K	VPS13D_c.11713G>A_p.E3905K_2	CTCGATGACCTCATTCTCA	BRCA_HER-positive carcinoma
VPS13D_c.11713G>A_p.E3905K	VPS13D_c.11713G>A_p.E3905K_3	TCTCGATGACCTCATTCTC	BRCA_HER-positive carcinoma
C1orf158_c.517G>A_p.A173T	C1orf158_c.517G>A_p.A173T_5	CATAGCGCACAACGGTGGT	Hepatocellular carcinoma
C1orf158_c.517G>A_p.A173T	C1orf158_c.517G>A_p.A173T_2	AGCGCACAACGGTGGTCTG	Hepatocellular carcinoma
C1orf158_c.517G>A_p.A173T	C1orf158_c.517G>A_p.A173T_3	TAGCGCACAACGGTGGTCT	Hepatocellular carcinoma
C1orf158_c.517G>A_p.A173T	C1orf158_c.517G>A_p.A173T_4	ATAGCGCACAACGGTGGTC	Hepatocellular carcinoma
C1orf158_c.517G>A_p.A173T	C1orf158_c.517G>A_p.A173T_6	ACATAGCGCACAACGGTGG	Hepatocellular carcinoma
PRAMEF12_c.1430G>A_p.C477Y	PRAMEF12_c.1430G>A_p.C477Y_4	ACAGCAGGCATTCAACAGA	Hepatocellular carcinoma
PRAMEF12_c.1430G>A_p.C477Y	PRAMEF12_c.1430G>A_p.C477Y_2	AGCAGGCATTCAACAGACA	Hepatocellular carcinoma
PRAMEF12_c.1430G>A_p.C477Y	PRAMEF12_c.1430G>A_p.C477Y_3	CAGCAGGCATTCAACAGAC	Hepatocellular carcinoma
PRAMEF12_c.1430G>A_p.C477Y	PRAMEF12_c.1430G>A_p.C477Y_6	TGACAGCAGGCATTCAACA	Hepatocellular carcinoma
PRAMEF12_c.1430G>A_p.C477Y	PRAMEF12_c.1430G>A_p.C477Y_5	GACAGCAGGCATTCAACAG	Hepatocellular carcinoma
PRAMEF12_c.1438G>A_p.G480S	PRAMEF12_c.1438G>A_p.G480S_3	CACCCTGACAGCAGGCATT	Hepatocellular carcinoma
PRAMEF12_c.1438G>A_p.G480S	PRAMEF12_c.1438G>A_p.G480S_4	CCACCCTGACAGCAGGCAT	Hepatocellular carcinoma
PRAMEF12_c.1438G>A_p.G480S	PRAMEF12_c.1438G>A_p.G480S_2	ACCCTGACAGCAGGCATTC	Hepatocellular carcinoma
PRAMEF12_c.1438G>A_p.G480S	PRAMEF12_c.1438G>A_p.G480S_5	TCCACCCTGACAGCAGGCA	Hepatocellular carcinoma
PRAMEF12_c.1438G>A_p.G480S	PRAMEF12_c.1438G>A_p.G480S_6	ATCCACCCTGACAGCAGGC	Hepatocellular carcinoma
PRAMEF4_c.310G>A_p.V104M	PRAMEF4_c.310G>A_p.V104M_2	CACTTGAAGTTTCCACCTC	BRCA_HER-positive carcinoma
PRAMEF4_c.310G>A_p.V104M	PRAMEF4_c.310G>A_p.V104M_3	GCACTTGAAGTTTCCACCT	BRCA_HER-positive carcinoma
PRAMEF4_c.310G>A_p.V104M	PRAMEF4_c.310G>A_p.V104M_6	CCAGCACTTGAAGTTTCCA	BRCA_HER-positive carcinoma
PRAMEF4_c.310G>A_p.V104M	PRAMEF4_c.310G>A_p.V104M_4	AGCACTTGAAGTTTCCACC	BRCA_HER-positive carcinoma
PRAMEF4_c.310G>A_p.V104M	PRAMEF4_c.310G>A_p.V104M_5	CAGCACTTGAAGTTTCCAC	BRCA_HER-positive carcinoma
ACAP3_c.1795G>A_p.A599T	ACAP3_c.1795G>A_p.A599T_2	TGCGGCCCCTGCGTCGAAG	BRCA_HER-positive carcinoma
ACAP3_c.1795G>A_p.A599T	ACAP3_c.1795G>A_p.A599T_5	CCCTGCGGCCCCTGCGTCG	BRCA_HER-positive carcinoma
ACAP3_c.1795G>A_p.A599T	ACAP3_c.1795G>A_p.A599T_6	CCCCTGCGGCCCCTGCGTC	BRCA_HER-positive carcinoma
ACAP3_c.1795G>A_p.A599T	ACAP3_c.1795G>A_p.A599T_3	CTGCGGCCCCTGCGTCGAA	BRCA_HER-positive carcinoma
ACAP3_c.1795G>A_p.A599T	ACAP3_c.1795G>A_p.A599T_4	CCTGCGGCCCCTGCGTCGA	BRCA_HER-positive carcinoma
HNRNPCL2_c.410C>T_p.A137V	HNRNPCL2_c.410C>T_p.A137V_2	TGCTCTGGCTGTAGTGCCC	Small cell carcinoma
HNRNPCL2_c.410C>T_p.A137V	HNRNPCL2_c.410C>T_p.A137V_5	CATTGCTCTGGCTGTAGTG	Small cell carcinoma
HNRNPCL2_c.410C>T_p.A137V	HNRNPCL2_c.410C>T_p.A137V_6	CCATTGCTCTGGCTGTAGT	Small cell carcinoma
HNRNPCL2_c.410C>T_p.A137V	HNRNPCL2_c.410C>T_p.A137V_3	TTGCTCTGGCTGTAGTGCC	Small cell carcinoma
HNRNPCL2_c.410C>T_p.A137V	HNRNPCL2_c.410C>T_p.A137V_4	ATTGCTCTGGCTGTAGTGC	Small cell carcinoma
PRAMEF19_c.1216C>T_p.R406W	PRAMEF19_c.1216C>T_p.R406W_4	CTTGCGGGGAAGGCCTGCC	Non small cell carcinoma
PRAMEF19_c.1216C>T_p.R406W	PRAMEF19_c.1216C>T_p.R406W_5	GCTTGCGGGGAAGGCCTGC	Non small cell carcinoma
PRAMEF19_c.1216C>T_p.R406W	PRAMEF19_c.1216C>T_p.R406W_2	TGCGGGGAAGGCCTGCCTA	Non small cell carcinoma
PRAMEF19_c.1216C>T_p.R406W	PRAMEF19_c.1216C>T_p.R406W_3	TTGCGGGGAAGGCCTGCCT	Non small cell carcinoma
PRAMEF19_c.1216C>T_p.R406W	PRAMEF19_c.1216C>T_p.R406W_6	TGCTTGCGGGGAAGGCCTG	Non small cell carcinoma
BCL9_c.176C>T_p.S59F	BCL9_c.176C>T_p.S59F_6	GCCAATCCCAGCCATCCCC	Hepatocellular carcinoma
BCL9_c.176C>T_p.S59F	BCL9_c.176C>T_p.S59F_5	CCAATCCCAGCCATCCCCC	Hepatocellular carcinoma
BCL9_c.176C>T_p.S59F	BCL9_c.176C>T_p.S59F_4	CAATCCCAGCCATCCCCCT	Hepatocellular carcinoma
BCL9_c.176C>T_p.S59F	BCL9_c.176C>T_p.S59F_2	ATCCCAGCCATCCCCCTGT	Hepatocellular carcinoma
BCL9_c.176C>T_p.S59F	BCL9_c.176C>T_p.S59F_3	AATCCCAGCCATCCCCCTG	Hepatocellular carcinoma
GJA8_c.328G>A_p.E110K	GJA8_c.328G>A_p.E110K_3	CCTCGCGGCTTTTGCGCTT	BRCA_Basal (triple-negative) carcinoma
GJA8_c.328G>A_p.E110K	GJA8_c.328G>A_p.E110K_4	GCCTCGCGGCTTTTGCGCT	BRCA_Basal (triple-negative) carcinoma
GJA8_c.328G>A_p.E110K	GJA8_c.328G>A_p.E110K_5	CGCCTCGCGGCTTTTGCGC	BRCA_Basal (triple-negative) carcinoma
GJA8_c.328G>A_p.E110K	GJA8_c.328G>A_p.E110K_6	CCGCCTCGCGGCTTTTGCG	BRCA_Basal (triple-negative) carcinoma
GJA8_c.328G>A_p.E110K	GJA8_c.328G>A_p.E110K_2	CTCGCGGCTTTTGCGCTTC	BRCA_Basal (triple-negative) carcinoma
PDE4DIP_c.6770C>T_p.A2257V	PDE4DIP_c.6770C>T_p.A2257V_2	AGCGGCCCTGCCAAGCACC	BRCA_HER-positive carcinoma
PDE4DIP_c.6770C>T_p.A2257V	PDE4DIP_c.6770C>T_p.A2257V_4	AGAGCGGCCCTGCCAAGCA	BRCA_HER-positive carcinoma
PDE4DIP_c.6770C>T_p.A2257V	PDE4DIP_c.6770C>T_p.A2257V_5	GAGAGCGGCCCTGCCAAGC	BRCA_HER-positive carcinoma
PDE4DIP_c.6770C>T_p.A2257V	PDE4DIP_c.6770C>T_p.A2257V_6	GGAGAGCGGCCCTGCCAAG	BRCA_HER-positive carcinoma
PDE4DIP_c.6770C>T_p.A2257V	PDE4DIP_c.6770C>T_p.A2257V_3	GAGCGGCCCTGCCAAGCAC	BRCA_HER-positive carcinoma
MRPS21_c.185G>A_p.R62Q	MRPS21_c.185G>A_p.R62Q_4	GATCCGCCGGCACCTTTCA	BRCA_HER-positive carcinoma
MRPS21_c.185G>A_p.R62Q	MRPS21_c.185G>A_p.R62Q_5	AGATCCGCCGGCACCTTTC	BRCA_HER-positive carcinoma
MRPS21_c.185G>A_p.R62Q	MRPS21_c.185G>A_p.R62Q_6	TAGATCCGCCGGCACCTTT	BRCA_HER-positive carcinoma
MRPS21_c.185G>A_p.R62Q	MRPS21_c.185G>A_p.R62Q_2	TCCGCCGGCACCTTTCATA	BRCA_HER-positive carcinoma
MRPS21_c.185G>A_p.R62Q	MRPS21_c.185G>A_p.R62Q_3	ATCCGCCGGCACCTTTCAT	BRCA_HER-positive carcinoma
PSMD4_c.640C>T_p.P214S	PSMD4_c.640C>T_p.P214S_4	TGATCCTGAGCTGGCCTTG	BRCA_HER-positive carcinoma
PSMD4_c.640C>T_p.P214S	PSMD4_c.640C>T_p.P214S_5	CTGATCCTGAGCTGGCCTT	BRCA_HER-positive carcinoma
PSMD4_c.640C>T_p.P214S	PSMD4_c.640C>T_p.P214S_2	ATCCTGAGCTGGCCTTGGT	BRCA_HER-positive carcinoma
PSMD4_c.640C>T_p.P214S	PSMD4_c.640C>T_p.P214S_3	GATCCTGAGCTGGCCTTGG	BRCA_HER-positive carcinoma
PSMD4_c.640C>T_p.P214S	PSMD4_c.640C>T_p.P214S_6	GCTGATCCTGAGCTGGCCT	BRCA_HER-positive carcinoma
FLG_c.7015G>A_p.D2339N	FLG_c.7015G>A_p.D2339N_3	TGTCTGCTGACTGCTGGTG	Non small cell carcinoma
FLG_c.7015G>A_p.D2339N	FLG_c.7015G>A_p.D2339N_4	CTGTCTGCTGACTGCTGGT	Non small cell carcinoma
FLG_c.7015G>A_p.D2339N	FLG_c.7015G>A_p.D2339N_2	GTCTGCTGACTGCTGGTGG	Non small cell carcinoma
FLG_c.7015G>A_p.D2339N	FLG_c.7015G>A_p.D2339N_6	AGCTGTCTGCTGACTGCTG	Non small cell carcinoma
FLG_c.7015G>A_p.D2339N	FLG_c.7015G>A_p.D2339N_5	GCTGTCTGCTGACTGCTGG	Non small cell carcinoma
FLG_c.4882C>T_p.H1628Y	FLG_c.4882C>T_p.H1628Y_3	AGACATGGCTCCAGGAACC	Hepatocellular carcinoma
FLG_c.4882C>T_p.H1628Y	FLG_c.4882C>T_p.H1628Y_4	AAGACATGGCTCCAGGAAC	Hepatocellular carcinoma
FLG_c.4882C>T_p.H1628Y	FLG_c.4882C>T_p.H1628Y_2	GACATGGCTCCAGGAACCC	Hepatocellular carcinoma
FLG_c.4882C>T_p.H1628Y	FLG_c.4882C>T_p.H1628Y_5	CAAGACATGGCTCCAGGAA	Hepatocellular carcinoma
FLG_c.4882C>T_p.H1628Y	FLG_c.4882C>T_p.H1628Y_6	TCAAGACATGGCTCCAGGA	Hepatocellular carcinoma
FHAD1_c.3100G>A_p.E1034K	FHAD1_c.3100G>A_p.E1034K_2	CTCGTTTAGCTCCCCTGCG	BRCA_HER-positive carcinoma
FHAD1_c.3100G>A_p.E1034K	FHAD1_c.3100G>A_p.E1034K_3	TCTCGTTTAGCTCCCCTGC	BRCA_HER-positive carcinoma
FHAD1_c.3100G>A_p.E1034K	FHAD1_c.3100G>A_p.E1034K_6	GCTTCTCGTTTAGCTCCCC	BRCA_HER-positive carcinoma
FHAD1_c.3100G>A_p.E1034K	FHAD1_c.3100G>A_p.E1034K_4	TTCTCGTTTAGCTCCCCTG	BRCA_HER-positive carcinoma
FHAD1_c.3100G>A_p.E1034K	FHAD1_c.3100G>A_p.E1034K_5	CTTCTCGTTTAGCTCCCCT	BRCA_HER-positive carcinoma
NPR1_c.1126G>A_p.D376N	NPR1_c.1126G>A_p.D376N_2	ATCAGTAACAGTTCCCCCA	BRCA_HER-positive carcinoma
NPR1_c.1126G>A_p.D376N	NPR1_c.1126G>A_p.D376N_6	CCCCATCAGTAACAGTTCC	BRCA_HER-positive carcinoma
NPR1_c.1126G>A_p.D376N	NPR1_c.1126G>A_p.D376N_5	CCCATCAGTAACAGTTCCC	BRCA_HER-positive carcinoma
NPR1_c.1126G>A_p.D376N	NPR1_c.1126G>A_p.D376N_3	CATCAGTAACAGTTCCCCC	BRCA_HER-positive carcinoma
NPR1_c.1126G>A_p.D376N	NPR1_c.1126G>A_p.D376N_4	CCATCAGTAACAGTTCCCC	BRCA_HER-positive carcinoma
ATP8B2_c.2803G>A_p.D935N	ATP8B2_c.2803G>A_p.D935N_3	GGTCATAGACGGTCTGGAA	BRCA_HER-positive carcinoma
ATP8B2_c.2803G>A_p.D935N	ATP8B2_c.2803G>A_p.D935N_2	GTCATAGACGGTCTGGAAG	BRCA_HER-positive carcinoma
ATP8B2_c.2803G>A_p.D935N	ATP8B2_c.2803G>A_p.D935N_4	TGGTCATAGACGGTCTGGA	BRCA_HER-positive carcinoma
ATP8B2_c.2803G>A_p.D935N	ATP8B2_c.2803G>A_p.D935N_5	CTGGTCATAGACGGTCTGG	BRCA_HER-positive carcinoma
ATP8B2_c.2803G>A_p.D935N	ATP8B2_c.2803G>A_p.D935N_6	ACTGGTCATAGACGGTCTG	BRCA_HER-positive carcinoma
ADAR_c.1714G>A_p.E572K	ADAR_c.1714G>A_p.E572K_2	TTCCTCTAGCAGAATTGTC	Hepatocellular carcinoma
ADAR_c.1714G>A_p.E572K	ADAR_c.1714G>A_p.E572K_6	TGGCTTCCTCTAGCAGAAT	Hepatocellular carcinoma
ADAR_c.1714G>A_p.E572K	ADAR_c.1714G>A_p.E572K_3	CTTCCTCTAGCAGAATTGT	Hepatocellular carcinoma
ADAR_c.1714G>A_p.E572K	ADAR_c.1714G>A_p.E572K_4	GCTTCCTCTAGCAGAATTG	Hepatocellular carcinoma
ADAR_c.1714G>A_p.E572K	ADAR_c.1714G>A_p.E572K_5	GGCTTCCTCTAGCAGAATT	Hepatocellular carcinoma
EFNA1_c.188C>T_p.A63V	EFNA1_c.188C>T_p.A63V_4	GCTGCCATGGAGCAGTACA	BRCA_HER-positive carcinoma
EFNA1_c.188C>T_p.A63V	EFNA1_c.188C>T_p.A63V_5	CGCTGCCATGGAGCAGTAC	BRCA_HER-positive carcinoma
EFNA1_c.188C>T_p.A63V	EFNA1_c.188C>T_p.A63V_6	ACGCTGCCATGGAGCAGTA	BRCA_HER-positive carcinoma
EFNA1_c.188C>T_p.A63V	EFNA1_c.188C>T_p.A63V_2	TGCCATGGAGCAGTACATA	BRCA_HER-positive carcinoma
EFNA1_c.188C>T_p.A63V	EFNA1_c.188C>T_p.A63V_3	CTGCCATGGAGCAGTACAT	BRCA_HER-positive carcinoma
GBA_c.721G>A_p.G241R	GBA_c.721G>A_p.G241R_4	TCTCCGGGCTGTCCCTTGA	Non small cell carcinoma
GBA_c.721G>A_p.G241R	GBA_c.721G>A_p.G241R_5	GTCTCCGGGCTGTCCCTTG	Non small cell carcinoma
GBA_c.721G>A_p.G241R	GBA_c.721G>A_p.G241R_2	TCCGGGCTGTCCCTTGAGT	Non small cell carcinoma
GBA_c.721G>A_p.G241R	GBA_c.721G>A_p.G241R_3	CTCCGGGCTGTCCCTTGAG	Non small cell carcinoma
GBA_c.721G>A_p.G241R	GBA_c.721G>A_p.G241R_6	TGTCTCCGGGCTGTCCCTT	Non small cell carcinoma
CLK2_c.140G>A_p.R47Q	CLK2_c.140G>A_p.R47Q_3	TCTCGCCGACGCCGTCGTG	BRCA_HER-positive carcinoma
CLK2_c.140G>A_p.R47Q	CLK2_c.140G>A_p.R47Q_4	CTCTCGCCGACGCCGTCGT	BRCA_HER-positive carcinoma
CLK2_c.140G>A_p.R47Q	CLK2_c.140G>A_p.R47Q_2	CTCGCCGACGCCGTCGTGT	BRCA_HER-positive carcinoma
CLK2_c.140G>A_p.R47Q	CLK2_c.140G>A_p.R47Q_6	TCCTCTCGCCGACGCCGTC	BRCA_HER-positive carcinoma
CLK2_c.140G>A_p.R47Q	CLK2_c.140G>A_p.R47Q_5	CCTCTCGCCGACGCCGTCG	BRCA_HER-positive carcinoma
PKLR_c.958G>A_p.V320M	PKLR_c.958G>A_p.V320M_3	TCACGCCTTCGTGGTTCTC	Small cell carcinoma
PKLR_c.958G>A_p.V320M	PKLR_c.958G>A_p.V320M_4	TTCACGCCTTCGTGGTTCT	Small cell carcinoma
PKLR_c.958G>A_p.V320M	PKLR_c.958G>A_p.V320M_2	CACGCCTTCGTGGTTCTCA	Small cell carcinoma
PKLR_c.958G>A_p.V320M	PKLR_c.958G>A_p.V320M_5	CTTCACGCCTTCGTGGTTC	Small cell carcinoma
PKLR_c.958G>A_p.V320M	PKLR_c.958G>A_p.V320M_6	TCTTCACGCCTTCGTGGTT	Small cell carcinoma
ASH1L_c.2950C>T_p.R984C	ASH1L_c.2950C>T_p.R984C_2	TCCGCAAAATAAATAAAAT	BRCA_HER-positive carcinoma
ASH1L_c.2950C>T_p.R984C	ASH1L_c.2950C>T_p.R984C_3	ATCCGCAAAATAAATAAAA	BRCA_HER-positive carcinoma
ASH1L_c.2950C>T_p.R984C	ASH1L_c.2950C>T_p.R984C_6	ATTATCCGCAAAATAAATA	BRCA_HER-positive carcinoma
ASH1L_c.2950C>T_p.R984C	ASH1L_c.2950C>T_p.R984C_4	TATCCGCAAAATAAATAAA	BRCA_HER-positive carcinoma
ASH1L_c.2950C>T_p.R984C	ASH1L_c.2950C>T_p.R984C_5	TTATCCGCAAAATAAATAA	BRCA_HER-positive carcinoma
ARHGEF2_c.2633G>A_p.R878K	ARHGEF2_c.2633G>A_p.R878K_2	GTCTGCGGGCCCAGGGGGC	BRCA_HER-positive carcinoma
ARHGEF2_c.2633G>A_p.R878K	ARHGEF2_c.2633G>A_p.R878K_6	ACAGGTCTGCGGGCCCAGG	BRCA_HER-positive carcinoma
ARHGEF2_c.2633G>A_p.R878K	ARHGEF2_c.2633G>A_p.R878K_5	CAGGTCTGCGGGCCCAGGG	BRCA_HER-positive carcinoma
ARHGEF2_c.2633G>A_p.R878K	ARHGEF2_c.2633G>A_p.R878K_3	GGTCTGCGGGCCCAGGGGG	BRCA_HER-positive carcinoma
ARHGEF2_c.2633G>A_p.R878K	ARHGEF2_c.2633G>A_p.R878K_4	AGGTCTGCGGGCCCAGGGG	BRCA_HER-positive carcinoma
LMNA_c.973G>A_p.D325N	LMNA_c.973G>A_p.D325N_3	AGTCCTCCAGGTCTCGAAG	BRCA_HER-positive carcinoma
LMNA_c.973G>A_p.D325N	LMNA_c.973G>A_p.D325N_2	GTCCTCCAGGTCTCGAAGC	BRCA_HER-positive carcinoma
LMNA_c.973G>A_p.D325N	LMNA_c.973G>A_p.D325N_4	GAGTCCTCCAGGTCTCGAA	BRCA_HER-positive carcinoma
LMNA_c.973G>A_p.D325N	LMNA_c.973G>A_p.D325N_5	TGAGTCCTCCAGGTCTCGA	BRCA_HER-positive carcinoma
LMNA_c.973G>A_p.D325N	LMNA_c.973G>A_p.D325N_6	GTGAGTCCTCCAGGTCTCG	BRCA_HER-positive carcinoma
RHBG_c.655G>A_p.D219N	RHBG_c.655G>A_p.D219N_2	GTCTGAATGGTAGACGGAG	BRCA_HER-positive carcinoma
RHBG_c.655G>A_p.D219N	RHBG_c.655G>A_p.D219N_6	AGAGGTCTGAATGGTAGAC	BRCA_HER-positive carcinoma
RHBG_c.655G>A_p.D219N	RHBG_c.655G>A_p.D219N_3	GGTCTGAATGGTAGACGGA	BRCA_HER-positive carcinoma
RHBG_c.655G>A_p.D219N	RHBG_c.655G>A_p.D219N_4	AGGTCTGAATGGTAGACGG	BRCA_HER-positive carcinoma
RHBG_c.655G>A_p.D219N	RHBG_c.655G>A_p.D219N_5	GAGGTCTGAATGGTAGACG	BRCA_HER-positive carcinoma
NES_c.4069G>A_p.E1357K	NES_c.4069G>A_p.E1357K_4	TCCTCTTCTCCCTCCTCCC	Hepatocellular carcinoma
NES_c.4069G>A_p.E1357K	NES_c.4069G>A_p.E1357K_5	CTCCTCTTCTCCCTCCTCC	Hepatocellular carcinoma
NES_c.4069G>A_p.E1357K	NES_c.4069G>A_p.E1357K_6	ACTCCTCTTCTCCCTCCTC	Hepatocellular carcinoma
NES_c.4069G>A_p.E1357K	NES_c.4069G>A_p.E1357K_2	CTCTTCTCCCTCCTCCCCC	Hepatocellular carcinoma
NES_c.4069G>A_p.E1357K	NES_c.4069G>A_p.E1357K_3	CCTCTTCTCCCTCCTCCCC	Hepatocellular carcinoma
PRCC_c.1444C>T_p.R482C	PRCC_c.1444C>T_p.R482C_4	CAGCCGCCGTCAGACCCAA	BRCA_HER-positive carcinoma
PRCC_c.1444C>T_p.R482C	PRCC_c.1444C>T_p.R482C_5	TCAGCCGCCGTCAGACCCA	BRCA_HER-positive carcinoma
PRCC_c.1444C>T_p.R482C	PRCC_c.1444C>T_p.R482C_2	GCCGCCGTCAGACCCAAGC	BRCA_HER-positive carcinoma
PRCC_c.1444C>T_p.R482C	PRCC_c.1444C>T_p.R482C_3	AGCCGCCGTCAGACCCAAG	BRCA_HER-positive carcinoma
PRCC_c.1444C>T_p.R482C	PRCC_c.1444C>T_p.R482C_6	CTCAGCCGCCGTCAGACCC	BRCA_HER-positive carcinoma
NTRK1_c.1187C>T_p.S396L	NTRK1_c.1187C>T_p.S396L_3	TCTCGCCGGTGGGTGAGTA	Non small cell carcinoma
NTRK1_c.1187C>T_p.S396L	NTRK1_c.1187C>T_p.S396L_4	TTCTCGCCGGTGGGTGAGT	Non small cell carcinoma
NTRK1_c.1187C>T_p.S396L	NTRK1_c.1187C>T_p.S396L_2	CTCGCCGGTGGGTGAGTAG	Non small cell carcinoma
NTRK1_c.1187C>T_p.S396L	NTRK1_c.1187C>T_p.S396L_6	CCTTCTCGCCGGTGGGTGA	Non small cell carcinoma
NTRK1_c.1187C>T_p.S396L	NTRK1_c.1187C>T_p.S396L_5	CTTCTCGCCGGTGGGTGAG	Non small cell carcinoma
NTRK1_c.2242C>T_p.R748W	NTRK1_c.2242C>T_p.R748W_3	GAGCGGCCACGTGCCTGCC	Non small cell carcinoma
NTRK1_c.2242C>T_p.R748W	NTRK1_c.2242C>T_p.R748W_4	GGAGCGGCCACGTGCCTGC	Non small cell carcinoma
NTRK1_c.2242C>T_p.R748W	NTRK1_c.2242C>T_p.R748W_2	AGCGGCCACGTGCCTGCCC	Non small cell carcinoma
NTRK1_c.2242C>T_p.R748W	NTRK1_c.2242C>T_p.R748W_5	TGGAGCGGCCACGTGCCTG	Non small cell carcinoma
NTRK1_c.2242C>T_p.R748W	NTRK1_c.2242C>T_p.R748W_6	TTGGAGCGGCCACGTGCCT	Non small cell carcinoma
ARHGEF11_c.3826C>T_p.P1276S	ARHGEF11_c.3826C>T_p.P1276S_2	CACCCACACCTTCTGTCAT	Non small cell carcinoma
ARHGEF11_c.3826C>T_p.P1276S	ARHGEF11_c.3826C>T_p.P1276S_3	ACACCCACACCTTCTGTCA	Non small cell carcinoma
ARHGEF11_c.3826C>T_p.P1276S	ARHGEF11_c.3826C>T_p.P1276S_6	CTGACACCCACACCTTCTG	Non small cell carcinoma
ARHGEF11_c.3826C>T_p.P1276S	ARHGEF11_c.3826C>T_p.P1276S_4	GACACCCACACCTTCTGTC	Non small cell carcinoma
ARHGEF11_c.3826C>T_p.P1276S	ARHGEF11_c.3826C>T_p.P1276S_5	TGACACCCACACCTTCTGT	Non small cell carcinoma
CD1B_c.656G>A_p.R219H	CD1B_c.656G>A_p.R219H_2	GACGGCCAGGTCCAGGACT	BRCA_HER-positive carcinoma
CD1B_c.656G>A_p.R219H	CD1B_c.656G>A_p.R219H_6	TGCAGACGGCCAGGTCCAG	BRCA_HER-positive carcinoma
CD1B_c.656G>A_p.R219H	CD1B_c.656G>A_p.R219H_5	GCAGACGGCCAGGTCCAGG	BRCA_HER-positive carcinoma
CD1B_c.656G>A_p.R219H	CD1B_c.656G>A_p.R219H_3	AGACGGCCAGGTCCAGGAC	BRCA_HER-positive carcinoma
CD1B_c.656G>A_p.R219H	CD1B_c.656G>A_p.R219H_4	CAGACGGCCAGGTCCAGGA	BRCA_HER-positive carcinoma
OR6K2_c.464C>T_p.P155L	OR6K2_c.464C>T_p.P155L_4	ACACCCCTTCCTGAGATTG	BRCA_HER-positive carcinoma
OR6K2_c.464C>T_p.P155L	OR6K2_c.464C>T_p.P155L_3	CACCCCTTCCTGAGATTGC	BRCA_HER-positive carcinoma
OR6K2_c.464C>T_p.P155L	OR6K2_c.464C>T_p.P155L_2	ACCCCTTCCTGAGATTGCC	BRCA_HER-positive carcinoma
OR6K2_c.464C>T_p.P155L	OR6K2_c.464C>T_p.P155L_5	CACACCCCTTCCTGAGATT	BRCA_HER-positive carcinoma
OR6K2_c.464C>T_p.P155L	OR6K2_c.464C>T_p.P155L_6	TCACACCCCTTCCTGAGAT	BRCA_HER-positive carcinoma
OR6N2_c.383G>A_p.R128Q	OR6N2_c.383G>A_p.R128Q_2	GCCGACAAATGGCCAGGTA	Hepatocellular carcinoma
OR6N2_c.383G>A_p.R128Q	OR6N2_c.383G>A_p.R128Q_3	GGCCGACAAATGGCCAGGT	Hepatocellular carcinoma
OR6N2_c.383G>A_p.R128Q	OR6N2_c.383G>A_p.R128Q_4	GGGCCGACAAATGGCCAGG	Hepatocellular carcinoma
OR6N2_c.383G>A_p.R128Q	OR6N2_c.383G>A_p.R128Q_5	GGGGCCGACAAATGGCCAG	Hepatocellular carcinoma
OR6N2_c.383G>A_p.R128Q	OR6N2_c.383G>A_p.R128Q_6	AGGGGCCGACAAATGGCCA	Hepatocellular carcinoma
DUSP23_c.356G>A_p.G119E	DUSP23_c.356G>A_p.G119E_2	CTCCTGCAGCCAAGCCCCG	Non small cell carcinoma
DUSP23_c.356G>A_p.G119E	DUSP23_c.356G>A_p.G119E_5	CATCTCCTGCAGCCAAGCC	Non small cell carcinoma
DUSP23_c.356G>A_p.G119E	DUSP23_c.356G>A_p.G119E_6	GCATCTCCTGCAGCCAAGC	Non small cell carcinoma
DUSP23_c.356G>A_p.G119E	DUSP23_c.356G>A_p.G119E_3	TCTCCTGCAGCCAAGCCCC	Non small cell carcinoma
DUSP23_c.356G>A_p.G119E	DUSP23_c.356G>A_p.G119E_4	ATCTCCTGCAGCCAAGCCC	Non small cell carcinoma
KCNJ10_c.538C>T_p.R180C	KCNJ10_c.538C>T_p.R180C_2	TTCGTTTCAGCCAGCATGC	Hepatocellular carcinoma
KCNJ10_c.538C>T_p.R180C	KCNJ10_c.538C>T_p.R180C_5	CCATTCGTTTCAGCCAGCA	Hepatocellular carcinoma
KCNJ10_c.538C>T_p.R180C	KCNJ10_c.538C>T_p.R180C_6	ACCATTCGTTTCAGCCAGC	Hepatocellular carcinoma
KCNJ10_c.538C>T_p.R180C	KCNJ10_c.538C>T_p.R180C_3	ATTCGTTTCAGCCAGCATG	Hepatocellular carcinoma
KCNJ10_c.538C>T_p.R180C	KCNJ10_c.538C>T_p.R180C_4	CATTCGTTTCAGCCAGCAT	Hepatocellular carcinoma
CASQ1_c.592G>A_p.E198K	CASQ1_c.592G>A_p.E198K_4	TCCTCGAAGGCTTTGTAAT	BRCA_HER-positive carcinoma
CASQ1_c.592G>A_p.E198K	CASQ1_c.592G>A_p.E198K_5	ATCCTCGAAGGCTTTGTAA	BRCA_HER-positive carcinoma
CASQ1_c.592G>A_p.E198K	CASQ1_c.592G>A_p.E198K_2	CTCGAAGGCTTTGTAATCT	BRCA_HER-positive carcinoma
CASQ1_c.592G>A_p.E198K	CASQ1_c.592G>A_p.E198K_3	CCTCGAAGGCTTTGTAATC	BRCA_HER-positive carcinoma
CASQ1_c.592G>A_p.E198K	CASQ1_c.592G>A_p.E198K_6	CATCCTCGAAGGCTTTGTA	BRCA_HER-positive carcinoma
DCAF8_c.442C>T_p.P148S	DCAF8_c.442C>T_p.P148S_3	CTACCCCGACCTCGCTGGC	Hepatocellular carcinoma
DCAF8_c.442C>T_p.P148S	DCAF8_c.442C>T_p.P148S_4	TCTACCCCGACCTCGCTGG	Hepatocellular carcinoma
DCAF8_c.442C>T_p.P148S	DCAF8_c.442C>T_p.P148S_5	CTCTACCCCGACCTCGCTG	Hepatocellular carcinoma
DCAF8_c.442C>T_p.P148S	DCAF8_c.442C>T_p.P148S_2	TACCCCGACCTCGCTGGCA	Hepatocellular carcinoma
DCAF8_c.442C>T_p.P148S	DCAF8_c.442C>T_p.P148S_6	GCTCTACCCCGACCTCGCT	Hepatocellular carcinoma
SLAMF6_c.829G>A_p.V277M	SLAMF6_c.829G>A_p.V277M_3	ACACTGAAACATACTCTAG	BRCA_HER-positive carcinoma
SLAMF6_c.829G>A_p.V277M	SLAMF6_c.829G>A_p.V277M_4	GACACTGAAACATACTCTA	BRCA_HER-positive carcinoma
SLAMF6_c.829G>A_p.V277M	SLAMF6_c.829G>A_p.V277M_2	CACTGAAACATACTCTAGG	BRCA_HER-positive carcinoma
SLAMF6_c.829G>A_p.V277M	SLAMF6_c.829G>A_p.V277M_5	AGACACTGAAACATACTCT	BRCA_HER-positive carcinoma
SLAMF6_c.829G>A_p.V277M	SLAMF6_c.829G>A_p.V277M_6	GAGACACTGAAACATACTC	BRCA_HER-positive carcinoma
ADAMTS4_c.1340G>A_p.R447H	ADAMTS4_c.1340G>A_p.R447H_2	GGCGGTCAGCATCATAGTC	BRCA_HER-positive carcinoma
ADAMTS4_c.1340G>A_p.R447H	ADAMTS4_c.1340G>A_p.R447H_3	TGGCGGTCAGCATCATAGT	BRCA_HER-positive carcinoma
ADAMTS4_c.1340G>A_p.R447H	ADAMTS4_c.1340G>A_p.R447H_6	CACTGGCGGTCAGCATCAT	BRCA_HER-positive carcinoma
ADAMTS4_c.1340G>A_p.R447H	ADAMTS4_c.1340G>A_p.R447H_4	CTGGCGGTCAGCATCATAG	BRCA_HER-positive carcinoma
ADAMTS4_c.1340G>A_p.R447H	ADAMTS4_c.1340G>A_p.R447H_5	ACTGGCGGTCAGCATCATA	BRCA_HER-positive carcinoma
EPHA2_c.1328G>A_p.R443K	EPHA2_c.1328G>A_p.R443K_3	AGCCTCACCTTGGGGGGCT	Hepatocellular carcinoma
EPHA2_c.1328G>A_p.R443K	EPHA2_c.1328G>A_p.R443K_4	CAGCCTCACCTTGGGGGGC	Hepatocellular carcinoma
EPHA2_c.1328G>A_p.R443K	EPHA2_c.1328G>A_p.R443K_2	GCCTCACCTTGGGGGGCTC	Hepatocellular carcinoma
EPHA2_c.1328G>A_p.R443K	EPHA2_c.1328G>A_p.R443K_5	CCAGCCTCACCTTGGGGGG	Hepatocellular carcinoma
EPHA2_c.1328G>A_p.R443K	EPHA2_c.1328G>A_p.R443K_6	TCCAGCCTCACCTTGGGGG	Hepatocellular carcinoma
RXRG_c.1046G>A_p.R349K	RXRG_c.1046G>A_p.R349K_3	CACCTGTCAAAGATGGAGC	Hepatocellular carcinoma
RXRG_c.1046G>A_p.R349K	RXRG_c.1046G>A_p.R349K_2	ACCTGTCAAAGATGGAGCC	Hepatocellular carcinoma
RXRG_c.1046G>A_p.R349K	RXRG_c.1046G>A_p.R349K_4	ACACCTGTCAAAGATGGAG	Hepatocellular carcinoma
RXRG_c.1046G>A_p.R349K	RXRG_c.1046G>A_p.R349K_5	GACACCTGTCAAAGATGGA	Hepatocellular carcinoma
RXRG_c.1046G>A_p.R349K	RXRG_c.1046G>A_p.R349K_6	AGACACCTGTCAAAGATGG	Hepatocellular carcinoma
TBX19_c.76G>A_p.E26K	TBX19_c.76G>A_p.E26K_2	CTCACTCTCCACCACATTG	Hepatocellular carcinoma
TBX19_c.76G>A_p.E26K	TBX19_c.76G>A_p.E26K_5	AAGCTCACTCTCCACCACA	Hepatocellular carcinoma
TBX19_c.76G>A_p.E26K	TBX19_c.76G>A_p.E26K_6	GAAGCTCACTCTCCACCAC	Hepatocellular carcinoma
TBX19_c.76G>A_p.E26K	TBX19_c.76G>A_p.E26K_3	GCTCACTCTCCACCACATT	Hepatocellular carcinoma
TBX19_c.76G>A_p.E26K	TBX19_c.76G>A_p.E26K_4	AGCTCACTCTCCACCACAT	Hepatocellular carcinoma
KIFAP3_c.405G>A_p.M135I	KIFAP3_c.405G>A_p.M135I_2	TCCATGTCATTAATGTTAG	BRCA_HER-positive carcinoma
KIFAP3_c.405G>A_p.M135I	KIFAP3_c.405G>A_p.M135I_5	TCATCCATGTCATTAATGT	BRCA_HER-positive carcinoma
KIFAP3_c.405G>A_p.M135I	KIFAP3_c.405G>A_p.M135I_6	TTCATCCATGTCATTAATG	BRCA_HER-positive carcinoma
KIFAP3_c.405G>A_p.M135I	KIFAP3_c.405G>A_p.M135I_3	ATCCATGTCATTAATGTTA	BRCA_HER-positive carcinoma
KIFAP3_c.405G>A_p.M135I	KIFAP3_c.405G>A_p.M135I_4	CATCCATGTCATTAATGTT	BRCA_HER-positive carcinoma
DNM3_c.1352G>A_p.R451K	DNM3_c.1352G>A_p.R451K_4	GAGTCTGGGGAAGTTTGCC	Hepatocellular carcinoma
DNM3_c.1352G>A_p.R451K	DNM3_c.1352G>A_p.R451K_5	AGAGTCTGGGGAAGTTTGC	Hepatocellular carcinoma
DNM3_c.1352G>A_p.R451K	DNM3_c.1352G>A_p.R451K_2	GTCTGGGGAAGTTTGCCAG	Hepatocellular carcinoma
DNM3_c.1352G>A_p.R451K	DNM3_c.1352G>A_p.R451K_3	AGTCTGGGGAAGTTTGCCA	Hepatocellular carcinoma
DNM3_c.1352G>A_p.R451K	DNM3_c.1352G>A_p.R451K_6	CAGAGTCTGGGGAAGTTTG	Hepatocellular carcinoma
RC3H1_c.1210G>A_p.D404N	RC3H1_c.1210G>A_p.D404N_3	GATCTGCTCCTTTTTTGCT	Hepatocellular carcinoma
RC3H1_c.1210G>A_p.D404N	RC3H1_c.1210G>A_p.D404N_4	TGATCTGCTCCTTTTTTGC	Hepatocellular carcinoma
RC3H1_c.1210G>A_p.D404N	RC3H1_c.1210G>A_p.D404N_5	CTGATCTGCTCCTTTTTTG	Hepatocellular carcinoma
RC3H1_c.1210G>A_p.D404N	RC3H1_c.1210G>A_p.D404N_2	ATCTGCTCCTTTTTTGCTG	Hepatocellular carcinoma
RC3H1_c.1210G>A_p.D404N	RC3H1_c.1210G>A_p.D404N_6	GCTGATCTGCTCCTTTTTT	Hepatocellular carcinoma
NADK_c.1459G>A_p.A487T	NADK_c.1459G>A_p.A487T_3	TGGCCGGCACGTTGGGGTG	BRCA_HER-positive carcinoma
NADK_c.1459G>A_p.A487T	NADK_c.1459G>A_p.A487T_4	ATGGCCGGCACGTTGGGGT	BRCA_HER-positive carcinoma
NADK_c.1459G>A_p.A487T	NADK_c.1459G>A_p.A487T_2	GGCCGGCACGTTGGGGTGG	BRCA_HER-positive carcinoma
NADK_c.1459G>A_p.A487T	NADK_c.1459G>A_p.A487T_5	GATGGCCGGCACGTTGGGG	BRCA_HER-positive carcinoma
NADK_c.1459G>A_p.A487T	NADK_c.1459G>A_p.A487T_6	TGATGGCCGGCACGTTGGG	BRCA_HER-positive carcinoma
ASTN1_c.2525G>A_p.R842H	ASTN1_c.2525G>A_p.R842H_2	CACGAGATGTAGCCCCATC	BRCA_HER-positive carcinoma
ASTN1_c.2525G>A_p.R842H	ASTN1_c.2525G>A_p.R842H_3	GCACGAGATGTAGCCCCAT	BRCA_HER-positive carcinoma
ASTN1_c.2525G>A_p.R842H	ASTN1_c.2525G>A_p.R842H_6	TCTGCACGAGATGTAGCCC	BRCA_HER-positive carcinoma
ASTN1_c.2525G>A_p.R842H	ASTN1_c.2525G>A_p.R842H_4	TGCACGAGATGTAGCCCCA	BRCA_HER-positive carcinoma
ASTN1_c.2525G>A_p.R842H	ASTN1_c.2525G>A_p.R842H_5	CTGCACGAGATGTAGCCCC	BRCA_HER-positive carcinoma
ASTN1_c.277G>A_p.V93M	ASTN1_c.277G>A_p.V93M_3	GCACGAAGTAGGGCAGCTC	BRCA_HER-positive carcinoma
ASTN1_c.277G>A_p.V93M	ASTN1_c.277G>A_p.V93M_4	AGCACGAAGTAGGGCAGCT	BRCA_HER-positive carcinoma
ASTN1_c.277G>A_p.V93M	ASTN1_c.277G>A_p.V93M_2	CACGAAGTAGGGCAGCTCC	BRCA_HER-positive carcinoma
ASTN1_c.277G>A_p.V93M	ASTN1_c.277G>A_p.V93M_5	CAGCACGAAGTAGGGCAGC	BRCA_HER-positive carcinoma
ASTN1_c.277G>A_p.V93M	ASTN1_c.277G>A_p.V93M_6	CCAGCACGAAGTAGGGCAG	BRCA_HER-positive carcinoma
ABL2_c.3053G>A_p.S1018N	ABL2_c.3053G>A_p.S1018N_3	CCACTGATGGGCACTGCGC	BRCA_HER-positive carcinoma
ABL2_c.3053G>A_p.S1018N	ABL2_c.3053G>A_p.S1018N_2	CACTGATGGGCACTGCGCC	BRCA_HER-positive carcinoma
ABL2_c.3053G>A_p.S1018N	ABL2_c.3053G>A_p.S1018N_4	CCCACTGATGGGCACTGCG	BRCA_HER-positive carcinoma
ABL2_c.3053G>A_p.S1018N	ABL2_c.3053G>A_p.S1018N_5	TCCCACTGATGGGCACTGC	BRCA_HER-positive carcinoma
ABL2_c.3053G>A_p.S1018N	ABL2_c.3053G>A_p.S1018N_6	TTCCCACTGATGGGCACTG	BRCA_HER-positive carcinoma
ABL2_c.853C>T_p.R285*	ABL2_c.853C>T_p.R285*_2	AGCGAACAGATATTACCAT	BRCA_HER-positive carcinoma
ABL2_c.853C>T_p.R285*	ABL2_c.853C>T_p.R285*_5	TGGAGCGAACAGATATTAC	BRCA_HER-positive carcinoma
ABL2_c.853C>T_p.R285*	ABL2_c.853C>T_p.R285*_6	ATGGAGCGAACAGATATTA	BRCA_HER-positive carcinoma
ABL2_c.853C>T_p.R285*	ABL2_c.853C>T_p.R285*_3	GAGCGAACAGATATTACCA	BRCA_HER-positive carcinoma
ABL2_c.853C>T_p.R285*	ABL2_c.853C>T_p.R285*_4	GGAGCGAACAGATATTACC	BRCA_HER-positive carcinoma
ARPC5_c.436C>T_p.R146C	ARPC5_c.436C>T_p.R146C_2	TTCGTGTCTTGACTGCAAG	Small cell carcinoma
ARPC5_c.436C>T_p.R146C	ARPC5_c.436C>T_p.R146C_5	TTGTTCGTGTCTTGACTGC	Small cell carcinoma
ARPC5_c.436C>T_p.R146C	ARPC5_c.436C>T_p.R146C_6	ATTGTTCGTGTCTTGACTG	Small cell carcinoma
ARPC5_c.436C>T_p.R146C	ARPC5_c.436C>T_p.R146C_3	GTTCGTGTCTTGACTGCAA	Small cell carcinoma
ARPC5_c.436C>T_p.R146C	ARPC5_c.436C>T_p.R146C_4	TGTTCGTGTCTTGACTGCA	Small cell carcinoma
HMCN1_c.9659G>A_p.G3220E	HMCN1_c.9659G>A_p.G3220E_4	GTTTCCACTATCTGAATGC	BRCA_HER-positive carcinoma
HMCN1_c.9659G>A_p.G3220E	HMCN1_c.9659G>A_p.G3220E_5	AGTTTCCACTATCTGAATG	BRCA_HER-positive carcinoma
HMCN1_c.9659G>A_p.G3220E	HMCN1_c.9659G>A_p.G3220E_2	TTCCACTATCTGAATGCTG	BRCA_HER-positive carcinoma
HMCN1_c.9659G>A_p.G3220E	HMCN1_c.9659G>A_p.G3220E_3	TTTCCACTATCTGAATGCT	BRCA_HER-positive carcinoma
HMCN1_c.9659G>A_p.G3220E	HMCN1_c.9659G>A_p.G3220E_6	TAGTTTCCACTATCTGAAT	BRCA_HER-positive carcinoma
HMCN1_c.15890G>A_p.R5297H	HMCN1_c.15890G>A_p.R5297H_3	CAACGATAGCTGCCTCTTG	BRCA_HER-positive carcinoma
HMCN1_c.15890G>A_p.R5297H	HMCN1_c.15890G>A_p.R5297H_4	ACAACGATAGCTGCCTCTT	BRCA_HER-positive carcinoma
HMCN1_c.15890G>A_p.R5297H	HMCN1_c.15890G>A_p.R5297H_5	CACAACGATAGCTGCCTCT	BRCA_HER-positive carcinoma
HMCN1_c.15890G>A_p.R5297H	HMCN1_c.15890G>A_p.R5297H_2	AACGATAGCTGCCTCTTGT	BRCA_HER-positive carcinoma
HMCN1_c.15890G>A_p.R5297H	HMCN1_c.15890G>A_p.R5297H_6	ACACAACGATAGCTGCCTC	BRCA_HER-positive carcinoma
PAX7_c.1183G>A_p.A395T	PAX7_c.1183G>A_p.A395T_3	CCGCACTGGGGTTGCCCAA	Hepatocellular carcinoma
PAX7_c.1183G>A_p.A395T	PAX7_c.1183G>A_p.A395T_4	ACCGCACTGGGGTTGCCCA	Hepatocellular carcinoma
PAX7_c.1183G>A_p.A395T	PAX7_c.1183G>A_p.A395T_2	CGCACTGGGGTTGCCCAAG	Hepatocellular carcinoma
PAX7_c.1183G>A_p.A395T	PAX7_c.1183G>A_p.A395T_5	CACCGCACTGGGGTTGCCC	Hepatocellular carcinoma
PAX7_c.1183G>A_p.A395T	PAX7_c.1183G>A_p.A395T_6	GCACCGCACTGGGGTTGCC	Hepatocellular carcinoma
CDC73_c.215C>T_p.P72L	CDC73_c.215C>T_p.P72L_2	TCCTGTTTATGTCCGACGT	BRCA_HER-positive carcinoma
CDC73_c.215C>T_p.P72L	CDC73_c.215C>T_p.P72L_3	ATCCTGTTTATGTCCGACG	BRCA_HER-positive carcinoma
CDC73_c.215C>T_p.P72L	CDC73_c.215C>T_p.P72L_6	CTCATCCTGTTTATGTCCG	BRCA_HER-positive carcinoma
CDC73_c.215C>T_p.P72L	CDC73_c.215C>T_p.P72L_4	CATCCTGTTTATGTCCGAC	BRCA_HER-positive carcinoma
CDC73_c.215C>T_p.P72L	CDC73_c.215C>T_p.P72L_5	TCATCCTGTTTATGTCCGA	BRCA_HER-positive carcinoma
ASPM_c.424G>A_p.E142K	ASPM_c.424G>A_p.E142K_4	TGCTCTTCTGCATTTCCTA	BRCA_HER-positive carcinoma
ASPM_c.424G>A_p.E142K	ASPM_c.424G>A_p.E142K_5	CTGCTCTTCTGCATTTCCT	BRCA_HER-positive carcinoma
ASPM_c.424G>A_p.E142K	ASPM_c.424G>A_p.E142K_3	GCTCTTCTGCATTTCCTAG	BRCA_HER-positive carcinoma
ASPM_c.424G>A_p.E142K	ASPM_c.424G>A_p.E142K_2	CTCTTCTGCATTTCCTAGT	BRCA_HER-positive carcinoma
ASPM_c.424G>A_p.E142K	ASPM_c.424G>A_p.E142K_6	TCTGCTCTTCTGCATTTCC	BRCA_HER-positive carcinoma
CAMSAP2_c.857G>A_p.S286N	CAMSAP2_c.857G>A_p.S286N_2	GGCTATCAGCCAAAGACAT	BRCA_HER-positive carcinoma
CAMSAP2_c.857G>A_p.S286N	CAMSAP2_c.857G>A_p.S286N_3	AGGCTATCAGCCAAAGACA	BRCA_HER-positive carcinoma
CAMSAP2_c.857G>A_p.S286N	CAMSAP2_c.857G>A_p.S286N_4	CAGGCTATCAGCCAAAGAC	BRCA_HER-positive carcinoma
CAMSAP2_c.857G>A_p.S286N	CAMSAP2_c.857G>A_p.S286N_5	ACAGGCTATCAGCCAAAGA	BRCA_HER-positive carcinoma
CAMSAP2_c.857G>A_p.S286N	CAMSAP2_c.857G>A_p.S286N_6	TACAGGCTATCAGCCAAAG	BRCA_HER-positive carcinoma
KIF21B_c.1780C>T_p.R594*	KIF21B_c.1780C>T_p.R594*_2	AGCGAGACGAGAGTGGCTG	Small cell carcinoma
KIF21B_c.1780C>T_p.R594*	KIF21B_c.1780C>T_p.R594*_3	GAGCGAGACGAGAGTGGCT	Small cell carcinoma
KIF21B_c.1780C>T_p.R594*	KIF21B_c.1780C>T_p.R594*_6	GAAGAGCGAGACGAGAGTG	Small cell carcinoma
KIF21B_c.1780C>T_p.R594*	KIF21B_c.1780C>T_p.R594*_4	AGAGCGAGACGAGAGTGGC	Small cell carcinoma
KIF21B_c.1780C>T_p.R594*	KIF21B_c.1780C>T_p.R594*_5	AAGAGCGAGACGAGAGTGG	Small cell carcinoma
IGFN1_c.1478C>T_p.P493L	IGFN1_c.1478C>T_p.P493L_2	TCCAGTAGCAGAGGGAAGC	Hepatocellular carcinoma
IGFN1_c.1478C>T_p.P493L	IGFN1_c.1478C>T_p.P493L_3	TTCCAGTAGCAGAGGGAAG	Hepatocellular carcinoma
IGFN1_c.1478C>T_p.P493L	IGFN1_c.1478C>T_p.P493L_6	GCTTTCCAGTAGCAGAGGG	Hepatocellular carcinoma
IGFN1_c.1478C>T_p.P493L	IGFN1_c.1478C>T_p.P493L_4	TTTCCAGTAGCAGAGGGAA	Hepatocellular carcinoma
IGFN1_c.1478C>T_p.P493L	IGFN1_c.1478C>T_p.P493L_5	CTTTCCAGTAGCAGAGGGA	Hepatocellular carcinoma
KDM5B_c.3619C>T_p.L1207F	KDM5B_c.3619C>T_p.L1207F_2	CTCTCCAAGATGTGGATAT	BRCA_HER-positive carcinoma
KDM5B_c.3619C>T_p.L1207F	KDM5B_c.3619C>T_p.L1207F_5	CGCCTCTCCAAGATGTGGA	BRCA_HER-positive carcinoma
KDM5B_c.3619C>T_p.L1207F	KDM5B_c.3619C>T_p.L1207F_6	TCGCCTCTCCAAGATGTGG	BRCA_HER-positive carcinoma
KDM5B_c.3619C>T_p.L1207F	KDM5B_c.3619C>T_p.L1207F_3	CCTCTCCAAGATGTGGATA	BRCA_HER-positive carcinoma
KDM5B_c.3619C>T_p.L1207F	KDM5B_c.3619C>T_p.L1207F_4	GCCTCTCCAAGATGTGGAT	BRCA_HER-positive carcinoma
ADORA1_c.623G>A_p.R208H	ADORA1_c.623G>A_p.R208H_4	CTTGCGGATTAGGTAGAAG	BRCA_HER-positive carcinoma
ADORA1_c.623G>A_p.R208H	ADORA1_c.623G>A_p.R208H_5	GCTTGCGGATTAGGTAGAA	BRCA_HER-positive carcinoma
ADORA1_c.623G>A_p.R208H	ADORA1_c.623G>A_p.R208H_6	TGCTTGCGGATTAGGTAGA	BRCA_HER-positive carcinoma
ADORA1_c.623G>A_p.R208H	ADORA1_c.623G>A_p.R208H_2	TGCGGATTAGGTAGAAGAC	BRCA_HER-positive carcinoma
ADORA1_c.623G>A_p.R208H	ADORA1_c.623G>A_p.R208H_3	TTGCGGATTAGGTAGAAGA	BRCA_HER-positive carcinoma
REN_c.887C>T_p.S296F	REN_c.887C>T_p.S296F_4	GCATCCTACATCTCAGGTT	Hepatocellular carcinoma
REN_c.887C>T_p.S296F	REN_c.887C>T_p.S296F_5	TGCATCCTACATCTCAGGT	Hepatocellular carcinoma
REN_c.887C>T_p.S296F	REN_c.887C>T_p.S296F_2	ATCCTACATCTCAGGTTCT	Hepatocellular carcinoma
REN_c.887C>T_p.S296F	REN_c.887C>T_p.S296F_3	CATCCTACATCTCAGGTTC	Hepatocellular carcinoma
REN_c.887C>T_p.S296F	REN_c.887C>T_p.S296F_6	GTGCATCCTACATCTCAGG	Hepatocellular carcinoma
PIK3C2B_c.2960G>A_p.R987K	PIK3C2B_c.2960G>A_p.R987K_3	TCTCTCAGCCCCTTGCCAC	BRCA_HER-positive carcinoma
PIK3C2B_c.2960G>A_p.R987K	PIK3C2B_c.2960G>A_p.R987K_4	TTCTCTCAGCCCCTTGCCA	BRCA_HER-positive carcinoma
PIK3C2B_c.2960G>A_p.R987K	PIK3C2B_c.2960G>A_p.R987K_2	CTCTCAGCCCCTTGCCACA	BRCA_HER-positive carcinoma
PIK3C2B_c.2960G>A_p.R987K	PIK3C2B_c.2960G>A_p.R987K_6	TCTTCTCTCAGCCCCTTGC	BRCA_HER-positive carcinoma
PIK3C2B_c.2960G>A_p.R987K	PIK3C2B_c.2960G>A_p.R987K_5	CTTCTCTCAGCCCCTTGCC	BRCA_HER-positive carcinoma
NFASC_c.1474C>T_p.R492C	NFASC_c.1474C>T_p.R492C_4	GATCCGCAAAGAGGACCAG	BRCA_HER-positive carcinoma
NFASC_c.1474C>T_p.R492C	NFASC_c.1474C>T_p.R492C_5	TGATCCGCAAAGAGGACCA	BRCA_HER-positive carcinoma
NFASC_c.1474C>T_p.R492C	NFASC_c.1474C>T_p.R492C_3	ATCCGCAAAGAGGACCAGG	BRCA_HER-positive carcinoma
NFASC_c.1474C>T_p.R492C	NFASC_c.1474C>T_p.R492C_2	TCCGCAAAGAGGACCAGGG	BRCA_HER-positive carcinoma
NFASC_c.1474C>T_p.R492C	NFASC_c.1474C>T_p.R492C_6	ATGATCCGCAAAGAGGACC	BRCA_HER-positive carcinoma
CNTN2_c.1915G>A_p.A639T	CNTN2_c.1915G>A_p.A639T_4	TTAGCGATGGGGCTGTGGT	BRCA_HER-positive carcinoma
CNTN2_c.1915G>A_p.A639T	CNTN2_c.1915G>A_p.A639T_2	AGCGATGGGGCTGTGGTTG	BRCA_HER-positive carcinoma
CNTN2_c.1915G>A_p.A639T	CNTN2_c.1915G>A_p.A639T_3	TAGCGATGGGGCTGTGGTT	BRCA_HER-positive carcinoma
CNTN2_c.1915G>A_p.A639T	CNTN2_c.1915G>A_p.A639T_5	CTTAGCGATGGGGCTGTGG	BRCA_HER-positive carcinoma
CNTN2_c.1915G>A_p.A639T	CNTN2_c.1915G>A_p.A639T_6	ACTTAGCGATGGGGCTGTG	BRCA_HER-positive carcinoma
SRGAP2_c.704G>A_p.R235H	SRGAP2_c.704G>A_p.R235H_3	TGACGCTGAAAAGGAAACA	Non small cell carcinoma
SRGAP2_c.704G>A_p.R235H	SRGAP2_c.704G>A_p.R235H_2	GACGCTGAAAAGGAAACAG	Non small cell carcinoma
SRGAP2_c.704G>A_p.R235H	SRGAP2_c.704G>A_p.R235H_6	GCTTGACGCTGAAAAGGAA	Non small cell carcinoma
SRGAP2_c.704G>A_p.R235H	SRGAP2_c.704G>A_p.R235H_4	TTGACGCTGAAAAGGAAAC	Non small cell carcinoma
SRGAP2_c.704G>A_p.R235H	SRGAP2_c.704G>A_p.R235H_5	CTTGACGCTGAAAAGGAAA	Non small cell carcinoma
KIF17_c.1942C>T_p.P648S	KIF17_c.1942C>T_p.P648S_2	TCCCTGCGCCGACAGACCT	Hepatocellular carcinoma
KIF17_c.1942C>T_p.P648S	KIF17_c.1942C>T_p.P648S_3	GTCCCTGCGCCGACAGACC	Hepatocellular carcinoma
KIF17_c.1942C>T_p.P648S	KIF17_c.1942C>T_p.P648S_6	CAGGTCCCTGCGCCGACAG	Hepatocellular carcinoma
KIF17_c.1942C>T_p.P648S	KIF17_c.1942C>T_p.P648S_4	GGTCCCTGCGCCGACAGAC	Hepatocellular carcinoma
KIF17_c.1942C>T_p.P648S	KIF17_c.1942C>T_p.P648S_5	AGGTCCCTGCGCCGACAGA	Hepatocellular carcinoma
FCMR_c.728C>T_p.S243L	FCMR_c.728C>T_p.S243L_2	CTCACAGTCTGGGAGGGAA	BRCA_HER-positive carcinoma
FCMR_c.728C>T_p.S243L	FCMR_c.728C>T_p.S243L_5	TGGCTCACAGTCTGGGAGG	BRCA_HER-positive carcinoma
FCMR_c.728C>T_p.S243L	FCMR_c.728C>T_p.S243L_6	ATGGCTCACAGTCTGGGAG	BRCA_HER-positive carcinoma
FCMR_c.728C>T_p.S243L	FCMR_c.728C>T_p.S243L_3	GCTCACAGTCTGGGAGGGA	BRCA_HER-positive carcinoma
FCMR_c.728C>T_p.S243L	FCMR_c.728C>T_p.S243L_4	GGCTCACAGTCTGGGAGGG	BRCA_HER-positive carcinoma
PFKFB2_c.604C>T_p.R202*	PFKFB2_c.604C>T_p.R202*_4	CTACCGACCTCTTGACCCA	BRCA_HER-positive carcinoma
PFKFB2_c.604C>T_p.R202*	PFKFB2_c.604C>T_p.R202*_5	CCTACCGACCTCTTGACCC	BRCA_HER-positive carcinoma
PFKFB2_c.604C>T_p.R202*	PFKFB2_c.604C>T_p.R202*_6	ACCTACCGACCTCTTGACC	BRCA_HER-positive carcinoma
PFKFB2_c.604C>T_p.R202*	PFKFB2_c.604C>T_p.R202*_2	ACCGACCTCTTGACCCAGA	BRCA_HER-positive carcinoma
PFKFB2_c.604C>T_p.R202*	PFKFB2_c.604C>T_p.R202*_3	TACCGACCTCTTGACCCAG	BRCA_HER-positive carcinoma
CR2_c.2738C>T_p.P913L	CR2_c.2738C>T_p.P913L_4	CCTCCGCCTAAGACCCCTA	BRCA_HER-positive carcinoma
CR2_c.2738C>T_p.P913L	CR2_c.2738C>T_p.P913L_5	ACCTCCGCCTAAGACCCCT	BRCA_HER-positive carcinoma
CR2_c.2738C>T_p.P913L	CR2_c.2738C>T_p.P913L_2	TCCGCCTAAGACCCCTAAC	BRCA_HER-positive carcinoma
CR2_c.2738C>T_p.P913L	CR2_c.2738C>T_p.P913L_3	CTCCGCCTAAGACCCCTAA	BRCA_HER-positive carcinoma
CR2_c.2738C>T_p.P913L	CR2_c.2738C>T_p.P913L_6	CACCTCCGCCTAAGACCCC	BRCA_HER-positive carcinoma
CR1_c.4877G>A_p.R1626H	CR1_c.4877G>A_p.R1626H_3	CGGCGGGGTCCTTTCATGA	Non small cell carcinoma
CR1_c.4877G>A_p.R1626H	CR1_c.4877G>A_p.R1626H_4	ACGGCGGGGTCCTTTCATG	Non small cell carcinoma
CR1_c.4877G>A_p.R1626H	CR1_c.4877G>A_p.R1626H_2	GGCGGGGTCCTTTCATGAC	Non small cell carcinoma
CR1_c.4877G>A_p.R1626H	CR1_c.4877G>A_p.R1626H_6	ACACGGCGGGGTCCTTTCA	Non small cell carcinoma
CR1_c.4877G>A_p.R1626H	CR1_c.4877G>A_p.R1626H_5	CACGGCGGGGTCCTTTCAT	Non small cell carcinoma
CR1L_c.655G>A_p.G219S	CR1L_c.655G>A_p.G219S_4	GGGCCACTCCAGATGCCCA	Non small cell carcinoma
CR1L_c.655G>A_p.G219S	CR1L_c.655G>A_p.G219S_5	TGGGCCACTCCAGATGCCC	Non small cell carcinoma
CR1L_c.655G>A_p.G219S	CR1L_c.655G>A_p.G219S_3	GGCCACTCCAGATGCCCAC	Non small cell carcinoma
CR1L_c.655G>A_p.G219S	CR1L_c.655G>A_p.G219S_2	GCCACTCCAGATGCCCACT	Non small cell carcinoma
CR1L_c.655G>A_p.G219S	CR1L_c.655G>A_p.G219S_6	CTGGGCCACTCCAGATGCC	Non small cell carcinoma
CR1L_c.1618C>T_p.R540C	CR1L_c.1618C>T_p.R540C_4	CCCTCGCTGTGAACTTCCT	Non small cell carcinoma
CR1L_c.1618C>T_p.R540C	CR1L_c.1618C>T_p.R540C_2	CTCGCTGTGAACTTCCTGT	Non small cell carcinoma
CR1L_c.1618C>T_p.R540C	CR1L_c.1618C>T_p.R540C_3	CCTCGCTGTGAACTTCCTG	Non small cell carcinoma
CR1L_c.1618C>T_p.R540C	CR1L_c.1618C>T_p.R540C_5	CCCCTCGCTGTGAACTTCC	Non small cell carcinoma
CR1L_c.1618C>T_p.R540C	CR1L_c.1618C>T_p.R540C_6	GCCCCTCGCTGTGAACTTC	Non small cell carcinoma
CD46_c.796G>A_p.D266N	CD46_c.796G>A_p.D266N_3	TGTCGCTGCCATCGAGGTA	Non small cell carcinoma
CD46_c.796G>A_p.D266N	CD46_c.796G>A_p.D266N_2	GTCGCTGCCATCGAGGTAA	Non small cell carcinoma
CD46_c.796G>A_p.D266N	CD46_c.796G>A_p.D266N_6	TTGTGTCGCTGCCATCGAG	Non small cell carcinoma
CD46_c.796G>A_p.D266N	CD46_c.796G>A_p.D266N_4	GTGTCGCTGCCATCGAGGT	Non small cell carcinoma
CD46_c.796G>A_p.D266N	CD46_c.796G>A_p.D266N_5	TGTGTCGCTGCCATCGAGG	Non small cell carcinoma
LAMB3_c.2306C>T_p.A769V	LAMB3_c.2306C>T_p.A769V_2	GGCCCTGAGGCTGGAGATG	BRCA_HER-positive carcinoma
LAMB3_c.2306C>T_p.A769V	LAMB3_c.2306C>T_p.A769V_3	TGGCCCTGAGGCTGGAGAT	BRCA_HER-positive carcinoma
LAMB3_c.2306C>T_p.A769V	LAMB3_c.2306C>T_p.A769V_6	TTGTGGCCCTGAGGCTGGA	BRCA_HER-positive carcinoma
LAMB3_c.2306C>T_p.A769V	LAMB3_c.2306C>T_p.A769V_4	GTGGCCCTGAGGCTGGAGA	BRCA_HER-positive carcinoma
LAMB3_c.2306C>T_p.A769V	LAMB3_c.2306C>T_p.A769V_5	TGTGGCCCTGAGGCTGGAG	BRCA_HER-positive carcinoma
NEK2_c.1009C>T_p.R337C	NEK2_c.1009C>T_p.R337C_2	TTCGTGAGAGACTAGCAGA	BRCA_Basal (triple-negative) carcinoma
NEK2_c.1009C>T_p.R337C	NEK2_c.1009C>T_p.R337C_5	GTGTTCGTGAGAGACTAGC	BRCA_Basal (triple-negative) carcinoma
NEK2_c.1009C>T_p.R337C	NEK2_c.1009C>T_p.R337C_6	TGTGTTCGTGAGAGACTAG	BRCA_Basal (triple-negative) carcinoma
NEK2_c.1009C>T_p.R337C	NEK2_c.1009C>T_p.R337C_3	GTTCGTGAGAGACTAGCAG	BRCA_Basal (triple-negative) carcinoma
NEK2_c.1009C>T_p.R337C	NEK2_c.1009C>T_p.R337C_4	TGTTCGTGAGAGACTAGCA	BRCA_Basal (triple-negative) carcinoma
NEK2_c.710C>T_p.P237L	NEK2_c.710C>T_p.P237L_4	ATTCCATACCGTTACTCTG	BRCA_Basal (triple-negative) carcinoma
NEK2_c.710C>T_p.P237L	NEK2_c.710C>T_p.P237L_5	AATTCCATACCGTTACTCT	BRCA_Basal (triple-negative) carcinoma
NEK2_c.710C>T_p.P237L	NEK2_c.710C>T_p.P237L_6	GAATTCCATACCGTTACTC	BRCA_Basal (triple-negative) carcinoma
NEK2_c.710C>T_p.P237L	NEK2_c.710C>T_p.P237L_2	TCCATACCGTTACTCTGAT	BRCA_Basal (triple-negative) carcinoma
NEK2_c.710C>T_p.P237L	NEK2_c.710C>T_p.P237L_3	TTCCATACCGTTACTCTGA	BRCA_Basal (triple-negative) carcinoma
PROX1_c.712C>T_p.Q238*	PROX1_c.712C>T_p.Q238*_4	CCGACAGCTGAAACAGCAG	BRCA_HER-positive carcinoma
PROX1_c.712C>T_p.Q238*	PROX1_c.712C>T_p.Q238*_5	GCCGACAGCTGAAACAGCA	BRCA_HER-positive carcinoma
PROX1_c.712C>T_p.Q238*	PROX1_c.712C>T_p.Q238*_2	GACAGCTGAAACAGCAGCT	BRCA_HER-positive carcinoma
PROX1_c.712C>T_p.Q238*	PROX1_c.712C>T_p.Q238*_3	CGACAGCTGAAACAGCAGC	BRCA_HER-positive carcinoma
PROX1_c.712C>T_p.Q238*	PROX1_c.712C>T_p.Q238*_6	CGCCGACAGCTGAAACAGC	BRCA_HER-positive carcinoma
USH2A_c.2627G>A_p.G876D	USH2A_c.2627G>A_p.G876D_3	AGACCTGTTACCCCTAATT	Non small cell carcinoma
USH2A_c.2627G>A_p.G876D	USH2A_c.2627G>A_p.G876D_4	AAGACCTGTTACCCCTAAT	Non small cell carcinoma
USH2A_c.2627G>A_p.G876D	USH2A_c.2627G>A_p.G876D_2	GACCTGTTACCCCTAATTT	Non small cell carcinoma
USH2A_c.2627G>A_p.G876D	USH2A_c.2627G>A_p.G876D_6	CGAAGACCTGTTACCCCTA	Non small cell carcinoma
USH2A_c.2627G>A_p.G876D	USH2A_c.2627G>A_p.G876D_5	GAAGACCTGTTACCCCTAA	Non small cell carcinoma
RRP15_c.767G>A_p.G256E	RRP15_c.767G>A_p.G256E_5	ATGCTCCCATCATGAAATC	BRCA_HER-positive carcinoma
RRP15_c.767G>A_p.G256E	RRP15_c.767G>A_p.G256E_4	TGCTCCCATCATGAAATCA	BRCA_HER-positive carcinoma
RRP15_c.767G>A_p.G256E	RRP15_c.767G>A_p.G256E_6	GATGCTCCCATCATGAAAT	BRCA_HER-positive carcinoma
RRP15_c.767G>A_p.G256E	RRP15_c.767G>A_p.G256E_2	CTCCCATCATGAAATCATC	BRCA_HER-positive carcinoma
RRP15_c.767G>A_p.G256E	RRP15_c.767G>A_p.G256E_3	GCTCCCATCATGAAATCAT	BRCA_HER-positive carcinoma
CELA3B_c.271G>A_p.A91T	CELA3B_c.271G>A_p.A91T_4	ACAGCACGGTCGTACTCGC	BRCA_HER-positive carcinoma
CELA3B_c.271G>A_p.A91T	CELA3B_c.271G>A_p.A91T_5	CACAGCACGGTCGTACTCG	BRCA_HER-positive carcinoma
CELA3B_c.271G>A_p.A91T	CELA3B_c.271G>A_p.A91T_6	TCACAGCACGGTCGTACTC	BRCA_HER-positive carcinoma
CELA3B_c.271G>A_p.A91T	CELA3B_c.271G>A_p.A91T_3	CAGCACGGTCGTACTCGCC	BRCA_HER-positive carcinoma
CELA3B_c.271G>A_p.A91T	CELA3B_c.271G>A_p.A91T_2	AGCACGGTCGTACTCGCCC	BRCA_HER-positive carcinoma
EPRS_c.897G>A_p.M299I	EPRS_c.897G>A_p.M299I_2	TTCATCTGTTCAGCAGGAG	BRCA_HER-positive carcinoma
EPRS_c.897G>A_p.M299I	EPRS_c.897G>A_p.M299I_5	GCTTTCATCTGTTCAGCAG	BRCA_HER-positive carcinoma
EPRS_c.897G>A_p.M299I	EPRS_c.897G>A_p.M299I_6	TGCTTTCATCTGTTCAGCA	BRCA_HER-positive carcinoma
EPRS_c.897G>A_p.M299I	EPRS_c.897G>A_p.M299I_3	TTTCATCTGTTCAGCAGGA	BRCA_HER-positive carcinoma
EPRS_c.897G>A_p.M299I	EPRS_c.897G>A_p.M299I_4	CTTTCATCTGTTCAGCAGG	BRCA_HER-positive carcinoma
HHIPL2_c.2038C>T_p.R680*	HHIPL2_c.2038C>T_p.R680*_5	CATTGCGAGGGCCTGGTAC	BRCA_HER-positive carcinoma
HHIPL2_c.2038C>T_p.R680*	HHIPL2_c.2038C>T_p.R680*_6	ACATTGCGAGGGCCTGGTA	BRCA_HER-positive carcinoma
HHIPL2_c.2038C>T_p.R680*	HHIPL2_c.2038C>T_p.R680*_2	TGCGAGGGCCTGGTACAAA	BRCA_HER-positive carcinoma
HHIPL2_c.2038C>T_p.R680*	HHIPL2_c.2038C>T_p.R680*_3	TTGCGAGGGCCTGGTACAA	BRCA_HER-positive carcinoma
HHIPL2_c.2038C>T_p.R680*	HHIPL2_c.2038C>T_p.R680*_4	ATTGCGAGGGCCTGGTACA	BRCA_HER-positive carcinoma
EPHA8_c.2974C>T_p.R992W	EPHA8_c.2974C>T_p.R992W_5	CCATGCGGGCCCAGCTGAC	Hepatocellular carcinoma
EPHA8_c.2974C>T_p.R992W	EPHA8_c.2974C>T_p.R992W_2	TGCGGGCCCAGCTGACCAG	Hepatocellular carcinoma
EPHA8_c.2974C>T_p.R992W	EPHA8_c.2974C>T_p.R992W_3	ATGCGGGCCCAGCTGACCA	Hepatocellular carcinoma
EPHA8_c.2974C>T_p.R992W	EPHA8_c.2974C>T_p.R992W_4	CATGCGGGCCCAGCTGACC	Hepatocellular carcinoma
EPHA8_c.2974C>T_p.R992W	EPHA8_c.2974C>T_p.R992W_6	ACCATGCGGGCCCAGCTGA	Hepatocellular carcinoma
MIXL1_c.436C>T_p.R146C	MIXL1_c.436C>T_p.R146C_4	CAGGCGTGCCAAGTCTCGG	BRCA_HER-positive carcinoma
MIXL1_c.436C>T_p.R146C	MIXL1_c.436C>T_p.R146C_2	GGCGTGCCAAGTCTCGGCG	BRCA_HER-positive carcinoma
MIXL1_c.436C>T_p.R146C	MIXL1_c.436C>T_p.R146C_3	AGGCGTGCCAAGTCTCGGC	BRCA_HER-positive carcinoma
MIXL1_c.436C>T_p.R146C	MIXL1_c.436C>T_p.R146C_5	ACAGGCGTGCCAAGTCTCG	BRCA_HER-positive carcinoma
MIXL1_c.436C>T_p.R146C	MIXL1_c.436C>T_p.R146C_6	AACAGGCGTGCCAAGTCTC	BRCA_HER-positive carcinoma
CDC42BPA_c.148G>A_p.E50K	CDC42BPA_c.148G>A_p.E50K_3	TCTCTCTTCTCAATGGAGA	Non small cell carcinoma
CDC42BPA_c.148G>A_p.E50K	CDC42BPA_c.148G>A_p.E50K_4	TTCTCTCTTCTCAATGGAG	Non small cell carcinoma
CDC42BPA_c.148G>A_p.E50K	CDC42BPA_c.148G>A_p.E50K_2	CTCTCTTCTCAATGGAGAA	Non small cell carcinoma
CDC42BPA_c.148G>A_p.E50K	CDC42BPA_c.148G>A_p.E50K_5	CTTCTCTCTTCTCAATGGA	Non small cell carcinoma
CDC42BPA_c.148G>A_p.E50K	CDC42BPA_c.148G>A_p.E50K_6	TCTTCTCTCTTCTCAATGG	Non small cell carcinoma
OBSCN_c.9301G>A_p.D3101N	OBSCN_c.9301G>A_p.D3101N_3	GGTCAGAGACTTCACACTG	BRCA_HER-positive carcinoma
OBSCN_c.9301G>A_p.D3101N	OBSCN_c.9301G>A_p.D3101N_2	GTCAGAGACTTCACACTGC	BRCA_HER-positive carcinoma
OBSCN_c.9301G>A_p.D3101N	OBSCN_c.9301G>A_p.D3101N_4	GGGTCAGAGACTTCACACT	BRCA_HER-positive carcinoma
OBSCN_c.9301G>A_p.D3101N	OBSCN_c.9301G>A_p.D3101N_5	GGGGTCAGAGACTTCACAC	BRCA_HER-positive carcinoma
OBSCN_c.9301G>A_p.D3101N	OBSCN_c.9301G>A_p.D3101N_6	CGGGGTCAGAGACTTCACA	BRCA_HER-positive carcinoma
OBSCN_c.19736C>T_p.T6579M	OBSCN_c.19736C>T_p.T6579M_2	CACGCTGCGGGAAGGCCAG	Small cell carcinoma
OBSCN_c.19736C>T_p.T6579M	OBSCN_c.19736C>T_p.T6579M_6	CCATCACGCTGCGGGAAGG	Small cell carcinoma
OBSCN_c.19736C>T_p.T6579M	OBSCN_c.19736C>T_p.T6579M_3	TCACGCTGCGGGAAGGCCA	Small cell carcinoma
OBSCN_c.19736C>T_p.T6579M	OBSCN_c.19736C>T_p.T6579M_4	ATCACGCTGCGGGAAGGCC	Small cell carcinoma
OBSCN_c.19736C>T_p.T6579M	OBSCN_c.19736C>T_p.T6579M_5	CATCACGCTGCGGGAAGGC	Small cell carcinoma
OBSCN_c.18869C>T_p.P6290L	OBSCN_c.18869C>T_p.P6290L_3	GGCCGGAGGCAGAACCAGG	Hepatocellular carcinoma
OBSCN_c.18869C>T_p.P6290L	OBSCN_c.18869C>T_p.P6290L_2	GCCGGAGGCAGAACCAGGC	Hepatocellular carcinoma
OBSCN_c.18869C>T_p.P6290L	OBSCN_c.18869C>T_p.P6290L_4	AGGCCGGAGGCAGAACCAG	Hepatocellular carcinoma
OBSCN_c.18869C>T_p.P6290L	OBSCN_c.18869C>T_p.P6290L_5	CAGGCCGGAGGCAGAACCA	Hepatocellular carcinoma
OBSCN_c.18869C>T_p.P6290L	OBSCN_c.18869C>T_p.P6290L_6	GCAGGCCGGAGGCAGAACC	Hepatocellular carcinoma
OBSCN_c.21847G>A_p.E7283K	OBSCN_c.21847G>A_p.E7283K_2	CTCCCCTGTGCCTGCCCCG	BRCA_HER-positive carcinoma
OBSCN_c.21847G>A_p.E7283K	OBSCN_c.21847G>A_p.E7283K_3	GCTCCCCTGTGCCTGCCCC	BRCA_HER-positive carcinoma
OBSCN_c.21847G>A_p.E7283K	OBSCN_c.21847G>A_p.E7283K_4	AGCTCCCCTGTGCCTGCCC	BRCA_HER-positive carcinoma
OBSCN_c.21847G>A_p.E7283K	OBSCN_c.21847G>A_p.E7283K_5	CAGCTCCCCTGTGCCTGCC	BRCA_HER-positive carcinoma
OBSCN_c.21847G>A_p.E7283K	OBSCN_c.21847G>A_p.E7283K_6	GCAGCTCCCCTGTGCCTGC	BRCA_HER-positive carcinoma
OBSCN_c.22877G>A_p.R7626H	OBSCN_c.22877G>A_p.R7626H_5	TGGCACGGTCACTCTCGCC	Hepatocellular carcinoma
OBSCN_c.22877G>A_p.R7626H	OBSCN_c.22877G>A_p.R7626H_6	GTGGCACGGTCACTCTCGC	Hepatocellular carcinoma
OBSCN_c.22877G>A_p.R7626H	OBSCN_c.22877G>A_p.R7626H_2	CACGGTCACTCTCGCCGGC	Hepatocellular carcinoma
OBSCN_c.22877G>A_p.R7626H	OBSCN_c.22877G>A_p.R7626H_3	GCACGGTCACTCTCGCCGG	Hepatocellular carcinoma
OBSCN_c.22877G>A_p.R7626H	OBSCN_c.22877G>A_p.R7626H_4	GGCACGGTCACTCTCGCCG	Hepatocellular carcinoma
OBSCN_c.26293G>A_p.V8765M	OBSCN_c.26293G>A_p.V8765M_5	GTCCACGACCTTGAGCAGG	BRCA_HER-positive carcinoma
OBSCN_c.26293G>A_p.V8765M	OBSCN_c.26293G>A_p.V8765M_2	CACGACCTTGAGCAGGTTG	BRCA_HER-positive carcinoma
OBSCN_c.26293G>A_p.V8765M	OBSCN_c.26293G>A_p.V8765M_3	CCACGACCTTGAGCAGGTT	BRCA_HER-positive carcinoma
OBSCN_c.26293G>A_p.V8765M	OBSCN_c.26293G>A_p.V8765M_4	TCCACGACCTTGAGCAGGT	BRCA_HER-positive carcinoma
OBSCN_c.26293G>A_p.V8765M	OBSCN_c.26293G>A_p.V8765M_6	GGTCCACGACCTTGAGCAG	BRCA_HER-positive carcinoma
OBSCN_c.26420C>T_p.A8807V	OBSCN_c.26420C>T_p.A8807V_4	TGGGCCATCGGTGTGACAG	BRCA_HER-positive carcinoma
OBSCN_c.26420C>T_p.A8807V	OBSCN_c.26420C>T_p.A8807V_2	GGCCATCGGTGTGACAGCC	BRCA_HER-positive carcinoma
OBSCN_c.26420C>T_p.A8807V	OBSCN_c.26420C>T_p.A8807V_3	GGGCCATCGGTGTGACAGC	BRCA_HER-positive carcinoma
OBSCN_c.26420C>T_p.A8807V	OBSCN_c.26420C>T_p.A8807V_5	CTGGGCCATCGGTGTGACA	BRCA_HER-positive carcinoma
OBSCN_c.26420C>T_p.A8807V	OBSCN_c.26420C>T_p.A8807V_6	TCTGGGCCATCGGTGTGAC	BRCA_HER-positive carcinoma
SKI_c.1168G>A_p.E390K	SKI_c.1168G>A_p.E390K_3	TCTCACTCGCTGACACTGC	BRCA_HER-positive carcinoma
SKI_c.1168G>A_p.E390K	SKI_c.1168G>A_p.E390K_4	TTCTCACTCGCTGACACTG	BRCA_HER-positive carcinoma
SKI_c.1168G>A_p.E390K	SKI_c.1168G>A_p.E390K_2	CTCACTCGCTGACACTGCG	BRCA_HER-positive carcinoma
SKI_c.1168G>A_p.E390K	SKI_c.1168G>A_p.E390K_5	TTTCTCACTCGCTGACACT	BRCA_HER-positive carcinoma
SKI_c.1168G>A_p.E390K	SKI_c.1168G>A_p.E390K_6	CTTTCTCACTCGCTGACAC	BRCA_HER-positive carcinoma
PGBD5_c.353C>T_p.P118L	PGBD5_c.353C>T_p.P118L_3	CCCCCAGCGCCAGTGCCGT	Hepatocellular carcinoma
PGBD5_c.353C>T_p.P118L	PGBD5_c.353C>T_p.P118L_2	CCCCAGCGCCAGTGCCGTG	Hepatocellular carcinoma
PGBD5_c.353C>T_p.P118L	PGBD5_c.353C>T_p.P118L_4	CCCCCCAGCGCCAGTGCCG	Hepatocellular carcinoma
PGBD5_c.353C>T_p.P118L	PGBD5_c.353C>T_p.P118L_5	GCCCCCCAGCGCCAGTGCC	Hepatocellular carcinoma
PGBD5_c.353C>T_p.P118L	PGBD5_c.353C>T_p.P118L_6	TGCCCCCCAGCGCCAGTGC	Hepatocellular carcinoma
C1orf131_c.292C>T_p.R98W	C1orf131_c.292C>T_p.R98W_2	AGCGGCATTGTGCTCCTTC	Small cell carcinoma
C1orf131_c.292C>T_p.R98W	C1orf131_c.292C>T_p.R98W_6	GAAGAGCGGCATTGTGCTC	Small cell carcinoma
C1orf131_c.292C>T_p.R98W	C1orf131_c.292C>T_p.R98W_3	GAGCGGCATTGTGCTCCTT	Small cell carcinoma
C1orf131_c.292C>T_p.R98W	C1orf131_c.292C>T_p.R98W_4	AGAGCGGCATTGTGCTCCT	Small cell carcinoma
C1orf131_c.292C>T_p.R98W	C1orf131_c.292C>T_p.R98W_5	AAGAGCGGCATTGTGCTCC	Small cell carcinoma
MAP3K21_c.2414C>T_p.P805L	MAP3K21_c.2414C>T_p.P805L_3	CACCTTCTTTCTCCACAAA	Hepatocellular carcinoma
MAP3K21_c.2414C>T_p.P805L	MAP3K21_c.2414C>T_p.P805L_2	ACCTTCTTTCTCCACAAAG	Hepatocellular carcinoma
MAP3K21_c.2414C>T_p.P805L	MAP3K21_c.2414C>T_p.P805L_4	ACACCTTCTTTCTCCACAA	Hepatocellular carcinoma
MAP3K21_c.2414C>T_p.P805L	MAP3K21_c.2414C>T_p.P805L_5	CACACCTTCTTTCTCCACA	Hepatocellular carcinoma
MAP3K21_c.2414C>T_p.P805L	MAP3K21_c.2414C>T_p.P805L_6	CCACACCTTCTTTCTCCAC	Hepatocellular carcinoma
IRF2BP2_c.139G>A_p.D47N	IRF2BP2_c.139G>A_p.D47N_2	GTCGGCGCCCTCGTAGTTG	BRCA_HER-positive carcinoma
IRF2BP2_c.139G>A_p.D47N	IRF2BP2_c.139G>A_p.D47N_3	GGTCGGCGCCCTCGTAGTT	BRCA_HER-positive carcinoma
IRF2BP2_c.139G>A_p.D47N	IRF2BP2_c.139G>A_p.D47N_4	CGGTCGGCGCCCTCGTAGT	BRCA_HER-positive carcinoma
IRF2BP2_c.139G>A_p.D47N	IRF2BP2_c.139G>A_p.D47N_5	GCGGTCGGCGCCCTCGTAG	BRCA_HER-positive carcinoma
IRF2BP2_c.139G>A_p.D47N	IRF2BP2_c.139G>A_p.D47N_6	CGCGGTCGGCGCCCTCGTA	BRCA_HER-positive carcinoma
NID1_c.2557C>T_p.R853*	NID1_c.2557C>T_p.R853*_5	ACGAGCGAGAACACATTCT	Hepatocellular carcinoma
NID1_c.2557C>T_p.R853*	NID1_c.2557C>T_p.R853*_6	CACGAGCGAGAACACATTC	Hepatocellular carcinoma
NID1_c.2557C>T_p.R853*	NID1_c.2557C>T_p.R853*_2	AGCGAGAACACATTCTCGG	Hepatocellular carcinoma
NID1_c.2557C>T_p.R853*	NID1_c.2557C>T_p.R853*_3	GAGCGAGAACACATTCTCG	Hepatocellular carcinoma
NID1_c.2557C>T_p.R853*	NID1_c.2557C>T_p.R853*_4	CGAGCGAGAACACATTCTC	Hepatocellular carcinoma
HEATR1_c.5302G>A_p.V1768M	HEATR1_c.5302G>A_p.V1768M_5	CTCCACAACCTTCTGCAGA	BRCA_HER-positive carcinoma
HEATR1_c.5302G>A_p.V1768M	HEATR1_c.5302G>A_p.V1768M_2	CACAACCTTCTGCAGAGCA	BRCA_HER-positive carcinoma
HEATR1_c.5302G>A_p.V1768M	HEATR1_c.5302G>A_p.V1768M_3	CCACAACCTTCTGCAGAGC	BRCA_HER-positive carcinoma
HEATR1_c.5302G>A_p.V1768M	HEATR1_c.5302G>A_p.V1768M_4	TCCACAACCTTCTGCAGAG	BRCA_HER-positive carcinoma
HEATR1_c.5302G>A_p.V1768M	HEATR1_c.5302G>A_p.V1768M_6	TCTCCACAACCTTCTGCAG	BRCA_HER-positive carcinoma
MTR_c.2309C>T_p.P770L	MTR_c.2309C>T_p.P770L_4	GACCCTTACCAGGGCACCA	BRCA_HER-positive carcinoma
MTR_c.2309C>T_p.P770L	MTR_c.2309C>T_p.P770L_2	CCCTTACCAGGGCACCATC	BRCA_HER-positive carcinoma
MTR_c.2309C>T_p.P770L	MTR_c.2309C>T_p.P770L_3	ACCCTTACCAGGGCACCAT	BRCA_HER-positive carcinoma
MTR_c.2309C>T_p.P770L	MTR_c.2309C>T_p.P770L_5	GGACCCTTACCAGGGCACC	BRCA_HER-positive carcinoma
MTR_c.2309C>T_p.P770L	MTR_c.2309C>T_p.P770L_6	AGGACCCTTACCAGGGCAC	BRCA_HER-positive carcinoma
RYR2_c.6859G>A_p.D2287N	RYR2_c.6859G>A_p.D2287N_3	TGTCTGGATAGCCCTTAGA	BRCA_HER-positive carcinoma
RYR2_c.6859G>A_p.D2287N	RYR2_c.6859G>A_p.D2287N_4	ATGTCTGGATAGCCCTTAG	BRCA_HER-positive carcinoma
RYR2_c.6859G>A_p.D2287N	RYR2_c.6859G>A_p.D2287N_2	GTCTGGATAGCCCTTAGAC	BRCA_HER-positive carcinoma
RYR2_c.6859G>A_p.D2287N	RYR2_c.6859G>A_p.D2287N_5	AATGTCTGGATAGCCCTTA	BRCA_HER-positive carcinoma
RYR2_c.6859G>A_p.D2287N	RYR2_c.6859G>A_p.D2287N_6	CAATGTCTGGATAGCCCTT	BRCA_HER-positive carcinoma
RYR2_c.8407C>T_p.R2803W	RYR2_c.8407C>T_p.R2803W_3	AACCGGACTCGTCGTATTT	BRCA_HER-positive carcinoma
RYR2_c.8407C>T_p.R2803W	RYR2_c.8407C>T_p.R2803W_2	ACCGGACTCGTCGTATTTC	BRCA_HER-positive carcinoma
RYR2_c.8407C>T_p.R2803W	RYR2_c.8407C>T_p.R2803W_4	CAACCGGACTCGTCGTATT	BRCA_HER-positive carcinoma
RYR2_c.8407C>T_p.R2803W	RYR2_c.8407C>T_p.R2803W_5	ACAACCGGACTCGTCGTAT	BRCA_HER-positive carcinoma
RYR2_c.8407C>T_p.R2803W	RYR2_c.8407C>T_p.R2803W_6	TACAACCGGACTCGTCGTA	BRCA_HER-positive carcinoma
FMN2_c.1514G>A_p.R505H	FMN2_c.1514G>A_p.R505H_2	CGCGCTCCAGCAGGTGCGC	Non small cell carcinoma
FMN2_c.1514G>A_p.R505H	FMN2_c.1514G>A_p.R505H_6	ACCCCGCGCTCCAGCAGGT	Non small cell carcinoma
FMN2_c.1514G>A_p.R505H	FMN2_c.1514G>A_p.R505H_3	CCGCGCTCCAGCAGGTGCG	Non small cell carcinoma
FMN2_c.1514G>A_p.R505H	FMN2_c.1514G>A_p.R505H_4	CCCGCGCTCCAGCAGGTGC	Non small cell carcinoma
FMN2_c.1514G>A_p.R505H	FMN2_c.1514G>A_p.R505H_5	CCCCGCGCTCCAGCAGGTG	Non small cell carcinoma
GREM2_c.250G>A_p.E84K	GREM2_c.250G>A_p.E84K_4	TCCTCGCTCACCGTCTGCC	BRCA_HER-positive carcinoma
GREM2_c.250G>A_p.E84K	GREM2_c.250G>A_p.E84K_3	CCTCGCTCACCGTCTGCCG	BRCA_HER-positive carcinoma
GREM2_c.250G>A_p.E84K	GREM2_c.250G>A_p.E84K_5	CTCCTCGCTCACCGTCTGC	BRCA_HER-positive carcinoma
GREM2_c.250G>A_p.E84K	GREM2_c.250G>A_p.E84K_6	CCTCCTCGCTCACCGTCTG	BRCA_HER-positive carcinoma
GREM2_c.250G>A_p.E84K	GREM2_c.250G>A_p.E84K_2	CTCGCTCACCGTCTGCCGC	BRCA_HER-positive carcinoma
RGS7_c.131G>A_p.R44H	RGS7_c.131G>A_p.R44H_2	TACGAATAGGAATTCCATT	BRCA_HER-positive carcinoma
RGS7_c.131G>A_p.R44H	RGS7_c.131G>A_p.R44H_3	GTACGAATAGGAATTCCAT	BRCA_HER-positive carcinoma
RGS7_c.131G>A_p.R44H	RGS7_c.131G>A_p.R44H_5	CCGTACGAATAGGAATTCC	BRCA_HER-positive carcinoma
RGS7_c.131G>A_p.R44H	RGS7_c.131G>A_p.R44H_6	ACCGTACGAATAGGAATTC	BRCA_HER-positive carcinoma
RGS7_c.131G>A_p.R44H	RGS7_c.131G>A_p.R44H_4	CGTACGAATAGGAATTCCA	BRCA_HER-positive carcinoma
WDR64_c.365G>A_p.R122Q	WDR64_c.365G>A_p.R122Q_2	TTCGCCTTTTTCTAGACAC	BRCA_HER-positive carcinoma
WDR64_c.365G>A_p.R122Q	WDR64_c.365G>A_p.R122Q_6	AAAATTCGCCTTTTTCTAG	BRCA_HER-positive carcinoma
WDR64_c.365G>A_p.R122Q	WDR64_c.365G>A_p.R122Q_3	ATTCGCCTTTTTCTAGACA	BRCA_HER-positive carcinoma
WDR64_c.365G>A_p.R122Q	WDR64_c.365G>A_p.R122Q_4	AATTCGCCTTTTTCTAGAC	BRCA_HER-positive carcinoma
WDR64_c.365G>A_p.R122Q	WDR64_c.365G>A_p.R122Q_5	AAATTCGCCTTTTTCTAGA	BRCA_HER-positive carcinoma
CNST_c.1195C>T_p.R399C	CNST_c.1195C>T_p.R399C_2	GTCGCTTGCAGCTGGCTCA	Non small cell carcinoma
CNST_c.1195C>T_p.R399C	CNST_c.1195C>T_p.R399C_6	GACAGTCGCTTGCAGCTGG	Non small cell carcinoma
CNST_c.1195C>T_p.R399C	CNST_c.1195C>T_p.R399C_3	AGTCGCTTGCAGCTGGCTC	Non small cell carcinoma
CNST_c.1195C>T_p.R399C	CNST_c.1195C>T_p.R399C_4	CAGTCGCTTGCAGCTGGCT	Non small cell carcinoma
CNST_c.1195C>T_p.R399C	CNST_c.1195C>T_p.R399C_5	ACAGTCGCTTGCAGCTGGC	Non small cell carcinoma
SRRM1_c.2185G>A_p.E729K	SRRM1_c.2185G>A_p.E729K_5	AGGTTCCGGAGTCCTGGAG	BRCA_HER-positive carcinoma
SRRM1_c.2185G>A_p.E729K	SRRM1_c.2185G>A_p.E729K_2	TTCCGGAGTCCTGGAGACT	BRCA_HER-positive carcinoma
SRRM1_c.2185G>A_p.E729K	SRRM1_c.2185G>A_p.E729K_3	GTTCCGGAGTCCTGGAGAC	BRCA_HER-positive carcinoma
SRRM1_c.2185G>A_p.E729K	SRRM1_c.2185G>A_p.E729K_4	GGTTCCGGAGTCCTGGAGA	BRCA_HER-positive carcinoma
SRRM1_c.2185G>A_p.E729K	SRRM1_c.2185G>A_p.E729K_6	TAGGTTCCGGAGTCCTGGA	BRCA_HER-positive carcinoma
AHCTF1_c.5791G>A_p.D1931N	AHCTF1_c.5791G>A_p.D1931N_4	TCATCTTGCTTATTTCCTG	BRCA_HER-positive carcinoma
AHCTF1_c.5791G>A_p.D1931N	AHCTF1_c.5791G>A_p.D1931N_5	ATCATCTTGCTTATTTCCT	BRCA_HER-positive carcinoma
AHCTF1_c.5791G>A_p.D1931N	AHCTF1_c.5791G>A_p.D1931N_2	ATCTTGCTTATTTCCTGTA	BRCA_HER-positive carcinoma
AHCTF1_c.5791G>A_p.D1931N	AHCTF1_c.5791G>A_p.D1931N_3	CATCTTGCTTATTTCCTGT	BRCA_HER-positive carcinoma
AHCTF1_c.5791G>A_p.D1931N	AHCTF1_c.5791G>A_p.D1931N_6	TATCATCTTGCTTATTTCC	BRCA_HER-positive carcinoma
NLRP3_c.1382G>A_p.G461D	NLRP3_c.1382G>A_p.G461D_4	GAGGCCGTGCTCCTGGCTC	Small cell carcinoma
NLRP3_c.1382G>A_p.G461D	NLRP3_c.1382G>A_p.G461D_2	GGCCGTGCTCCTGGCTCCC	Small cell carcinoma
NLRP3_c.1382G>A_p.G461D	NLRP3_c.1382G>A_p.G461D_3	AGGCCGTGCTCCTGGCTCC	Small cell carcinoma
NLRP3_c.1382G>A_p.G461D	NLRP3_c.1382G>A_p.G461D_5	AGAGGCCGTGCTCCTGGCT	Small cell carcinoma
NLRP3_c.1382G>A_p.G461D	NLRP3_c.1382G>A_p.G461D_6	CAGAGGCCGTGCTCCTGGC	Small cell carcinoma
OR1C1_c.566G>A_p.C189Y	OR1C1_c.566G>A_p.C189Y_3	GAGCAAGAGAGCTGCAGGA	BRCA_HER-positive carcinoma
OR1C1_c.566G>A_p.C189Y	OR1C1_c.566G>A_p.C189Y_2	AGCAAGAGAGCTGCAGGAG	BRCA_HER-positive carcinoma
OR1C1_c.566G>A_p.C189Y	OR1C1_c.566G>A_p.C189Y_6	TCAGAGCAAGAGAGCTGCA	BRCA_HER-positive carcinoma
OR1C1_c.566G>A_p.C189Y	OR1C1_c.566G>A_p.C189Y_4	AGAGCAAGAGAGCTGCAGG	BRCA_HER-positive carcinoma
OR1C1_c.566G>A_p.C189Y	OR1C1_c.566G>A_p.C189Y_5	CAGAGCAAGAGAGCTGCAG	BRCA_HER-positive carcinoma
OR14A16_c.157C>T_p.L53F	OR14A16_c.157C>T_p.L53F_4	TCATCTCCACACCCCCGTG	Hepatocellular carcinoma
OR14A16_c.157C>T_p.L53F	OR14A16_c.157C>T_p.L53F_3	CATCTCCACACCCCCGTGT	Hepatocellular carcinoma
OR14A16_c.157C>T_p.L53F	OR14A16_c.157C>T_p.L53F_2	ATCTCCACACCCCCGTGTA	Hepatocellular carcinoma
OR14A16_c.157C>T_p.L53F	OR14A16_c.157C>T_p.L53F_5	ATCATCTCCACACCCCCGT	Hepatocellular carcinoma
OR14A16_c.157C>T_p.L53F	OR14A16_c.157C>T_p.L53F_6	CATCATCTCCACACCCCCG	Hepatocellular carcinoma
OR2T8_c.479C>T_p.A160V	OR2T8_c.479C>T_p.A160V_2	TGCTACCCTGAGCTTCCCA	Non small cell carcinoma
OR2T8_c.479C>T_p.A160V	OR2T8_c.479C>T_p.A160V_3	TTGCTACCCTGAGCTTCCC	Non small cell carcinoma
OR2T8_c.479C>T_p.A160V	OR2T8_c.479C>T_p.A160V_4	GTTGCTACCCTGAGCTTCC	Non small cell carcinoma
OR2T8_c.479C>T_p.A160V	OR2T8_c.479C>T_p.A160V_5	TGTTGCTACCCTGAGCTTC	Non small cell carcinoma
OR2T8_c.479C>T_p.A160V	OR2T8_c.479C>T_p.A160V_6	CTGTTGCTACCCTGAGCTT	Non small cell carcinoma
OR2M5_c.262G>A_p.G88S	OR2M5_c.262G>A_p.G88S_2	GCCAGACAAGTAGTTGAAG	BRCA_HER-positive carcinoma
OR2M5_c.262G>A_p.G88S	OR2M5_c.262G>A_p.G88S_6	TGCTGCCAGACAAGTAGTT	BRCA_HER-positive carcinoma
OR2M5_c.262G>A_p.G88S	OR2M5_c.262G>A_p.G88S_3	TGCCAGACAAGTAGTTGAA	BRCA_HER-positive carcinoma
OR2M5_c.262G>A_p.G88S	OR2M5_c.262G>A_p.G88S_4	CTGCCAGACAAGTAGTTGA	BRCA_HER-positive carcinoma
OR2M5_c.262G>A_p.G88S	OR2M5_c.262G>A_p.G88S_5	GCTGCCAGACAAGTAGTTG	BRCA_HER-positive carcinoma
OR2T12_c.308C>T_p.P103L	OR2T12_c.308C>T_p.P103L_2	CCCCACACTGGGTGGTGGA	Non small cell carcinoma
OR2T12_c.308C>T_p.P103L	OR2T12_c.308C>T_p.P103L_6	TCCTCCCCACACTGGGTGG	Non small cell carcinoma
OR2T12_c.308C>T_p.P103L	OR2T12_c.308C>T_p.P103L_3	TCCCCACACTGGGTGGTGG	Non small cell carcinoma
OR2T12_c.308C>T_p.P103L	OR2T12_c.308C>T_p.P103L_4	CTCCCCACACTGGGTGGTG	Non small cell carcinoma
OR2T12_c.308C>T_p.P103L	OR2T12_c.308C>T_p.P103L_5	CCTCCCCACACTGGGTGGT	Non small cell carcinoma
PLCH2_c.1913C>T_p.T638I	PLCH2_c.1913C>T_p.T638I_5	GGCCACCCACGACATAGAG	BRCA_HER-positive carcinoma
PLCH2_c.1913C>T_p.T638I	PLCH2_c.1913C>T_p.T638I_2	CACCCACGACATAGAGATG	BRCA_HER-positive carcinoma
PLCH2_c.1913C>T_p.T638I	PLCH2_c.1913C>T_p.T638I_3	CCACCCACGACATAGAGAT	BRCA_HER-positive carcinoma
PLCH2_c.1913C>T_p.T638I	PLCH2_c.1913C>T_p.T638I_4	GCCACCCACGACATAGAGA	BRCA_HER-positive carcinoma
PLCH2_c.1913C>T_p.T638I	PLCH2_c.1913C>T_p.T638I_6	TGGCCACCCACGACATAGA	BRCA_HER-positive carcinoma
RHCE_c.1025C>T_p.T342I	RHCE_c.1025C>T_p.T342I_4	ATCACCTACATTGTGCTGC	Non small cell carcinoma
RHCE_c.1025C>T_p.T342I	RHCE_c.1025C>T_p.T342I_5	GATCACCTACATTGTGCTG	Non small cell carcinoma
RHCE_c.1025C>T_p.T342I	RHCE_c.1025C>T_p.T342I_2	CACCTACATTGTGCTGCTG	Non small cell carcinoma
RHCE_c.1025C>T_p.T342I	RHCE_c.1025C>T_p.T342I_3	TCACCTACATTGTGCTGCT	Non small cell carcinoma
RHCE_c.1025C>T_p.T342I	RHCE_c.1025C>T_p.T342I_6	AGATCACCTACATTGTGCT	Non small cell carcinoma
DHDDS_c.476G>A_p.R159H	DHDDS_c.476G>A_p.R159H_4	ATGACGGGATGTGTATGCA	BRCA_Basal (triple-negative) carcinoma
DHDDS_c.476G>A_p.R159H	DHDDS_c.476G>A_p.R159H_2	GACGGGATGTGTATGCAAA	BRCA_Basal (triple-negative) carcinoma
DHDDS_c.476G>A_p.R159H	DHDDS_c.476G>A_p.R159H_3	TGACGGGATGTGTATGCAA	BRCA_Basal (triple-negative) carcinoma
DHDDS_c.476G>A_p.R159H	DHDDS_c.476G>A_p.R159H_5	CATGACGGGATGTGTATGC	BRCA_Basal (triple-negative) carcinoma
DHDDS_c.476G>A_p.R159H	DHDDS_c.476G>A_p.R159H_6	TCATGACGGGATGTGTATG	BRCA_Basal (triple-negative) carcinoma
ARID1A_c.802C>T_p.Q268*	ARID1A_c.802C>T_p.Q268*_3	GCTCAGCAGCGCTTCGGGG	Non small cell carcinoma
ARID1A_c.802C>T_p.Q268*	ARID1A_c.802C>T_p.Q268*_2	CTCAGCAGCGCTTCGGGGC	Non small cell carcinoma
ARID1A_c.802C>T_p.Q268*	ARID1A_c.802C>T_p.Q268*_6	TTCGCTCAGCAGCGCTTCG	Non small cell carcinoma
ARID1A_c.802C>T_p.Q268*	ARID1A_c.802C>T_p.Q268*_4	CGCTCAGCAGCGCTTCGGG	Non small cell carcinoma
ARID1A_c.802C>T_p.Q268*	ARID1A_c.802C>T_p.Q268*_5	TCGCTCAGCAGCGCTTCGG	Non small cell carcinoma
ARID1A_c.1210C>T_p.Q404*	ARID1A_c.1210C>T_p.Q404*_4	GCAGCAACAGGGACCTCCG	Hepatocellular carcinoma
ARID1A_c.1210C>T_p.Q404*	ARID1A_c.1210C>T_p.Q404*_3	CAGCAACAGGGACCTCCGT	Hepatocellular carcinoma
ARID1A_c.1210C>T_p.Q404*	ARID1A_c.1210C>T_p.Q404*_2	AGCAACAGGGACCTCCGTC	Hepatocellular carcinoma
ARID1A_c.1210C>T_p.Q404*	ARID1A_c.1210C>T_p.Q404*_5	CGCAGCAACAGGGACCTCC	Hepatocellular carcinoma
ARID1A_c.1210C>T_p.Q404*	ARID1A_c.1210C>T_p.Q404*_6	TCGCAGCAACAGGGACCTC	Hepatocellular carcinoma
ARID1A_c.1348C>T_p.Q450*	ARID1A_c.1348C>T_p.Q450*_2	AGCAGGTAGATGGTGATTG	Non small cell carcinoma
ARID1A_c.1348C>T_p.Q450*	ARID1A_c.1348C>T_p.Q450*_3	CAGCAGGTAGATGGTGATT	Non small cell carcinoma
ARID1A_c.1348C>T_p.Q450*	ARID1A_c.1348C>T_p.Q450*_4	ACAGCAGGTAGATGGTGAT	Non small cell carcinoma
ARID1A_c.1348C>T_p.Q450*	ARID1A_c.1348C>T_p.Q450*_5	CACAGCAGGTAGATGGTGA	Non small cell carcinoma
ARID1A_c.1348C>T_p.Q450*	ARID1A_c.1348C>T_p.Q450*_6	ACACAGCAGGTAGATGGTG	Non small cell carcinoma
ARID1A_c.1420C>T_p.Q474*	ARID1A_c.1420C>T_p.Q474*_2	AGCAAAGTCCTCACCCTCA	Non small cell carcinoma
ARID1A_c.1420C>T_p.Q474*	ARID1A_c.1420C>T_p.Q474*_6	AACCAGCAAAGTCCTCACC	Non small cell carcinoma
ARID1A_c.1420C>T_p.Q474*	ARID1A_c.1420C>T_p.Q474*_3	CAGCAAAGTCCTCACCCTC	Non small cell carcinoma
ARID1A_c.1420C>T_p.Q474*	ARID1A_c.1420C>T_p.Q474*_4	CCAGCAAAGTCCTCACCCT	Non small cell carcinoma
ARID1A_c.1420C>T_p.Q474*	ARID1A_c.1420C>T_p.Q474*_5	ACCAGCAAAGTCCTCACCC	Non small cell carcinoma
ARID1A_c.1435C>T_p.Q479*	ARID1A_c.1435C>T_p.Q479*_2	CTCAGCAGCAGCAGCCACC	Non small cell carcinoma
ARID1A_c.1435C>T_p.Q479*	ARID1A_c.1435C>T_p.Q479*_6	CACCCTCAGCAGCAGCAGC	Non small cell carcinoma
ARID1A_c.1435C>T_p.Q479*	ARID1A_c.1435C>T_p.Q479*_3	CCTCAGCAGCAGCAGCCAC	Non small cell carcinoma
ARID1A_c.1435C>T_p.Q479*	ARID1A_c.1435C>T_p.Q479*_4	CCCTCAGCAGCAGCAGCCA	Non small cell carcinoma
ARID1A_c.1435C>T_p.Q479*	ARID1A_c.1435C>T_p.Q479*_5	ACCCTCAGCAGCAGCAGCC	Non small cell carcinoma
ARID1A_c.1543C>T_p.Q515*	ARID1A_c.1543C>T_p.Q515*_5	CCTCTCAGCCTCCATACTC	Non small cell carcinoma
ARID1A_c.1543C>T_p.Q515*	ARID1A_c.1543C>T_p.Q515*_2	CTCAGCCTCCATACTCCCA	Non small cell carcinoma
ARID1A_c.1543C>T_p.Q515*	ARID1A_c.1543C>T_p.Q515*_3	TCTCAGCCTCCATACTCCC	Non small cell carcinoma
ARID1A_c.1543C>T_p.Q515*	ARID1A_c.1543C>T_p.Q515*_4	CTCTCAGCCTCCATACTCC	Non small cell carcinoma
ARID1A_c.1543C>T_p.Q515*	ARID1A_c.1543C>T_p.Q515*_6	TCCTCTCAGCCTCCATACT	Non small cell carcinoma
ARID1A_c.1831C>T_p.Q611*	ARID1A_c.1831C>T_p.Q611*_4	GTCTCAGGCATCCTCAGCC	Non small cell carcinoma
ARID1A_c.1831C>T_p.Q611*	ARID1A_c.1831C>T_p.Q611*_5	GGTCTCAGGCATCCTCAGC	Non small cell carcinoma
ARID1A_c.1831C>T_p.Q611*	ARID1A_c.1831C>T_p.Q611*_2	CTCAGGCATCCTCAGCCCC	Non small cell carcinoma
ARID1A_c.1831C>T_p.Q611*	ARID1A_c.1831C>T_p.Q611*_3	TCTCAGGCATCCTCAGCCC	Non small cell carcinoma
ARID1A_c.1831C>T_p.Q611*	ARID1A_c.1831C>T_p.Q611*_6	GGGTCTCAGGCATCCTCAG	Non small cell carcinoma
ARID1A_c.2830C>T_p.Q944*	ARID1A_c.2830C>T_p.Q944*_4	CCCTCAGGGACCCCCATAT	Non small cell carcinoma
ARID1A_c.2830C>T_p.Q944*	ARID1A_c.2830C>T_p.Q944*_2	CTCAGGGACCCCCATATTC	Non small cell carcinoma
ARID1A_c.2830C>T_p.Q944*	ARID1A_c.2830C>T_p.Q944*_3	CCTCAGGGACCCCCATATT	Non small cell carcinoma
ARID1A_c.2830C>T_p.Q944*	ARID1A_c.2830C>T_p.Q944*_5	ACCCTCAGGGACCCCCATA	Non small cell carcinoma
ARID1A_c.2830C>T_p.Q944*	ARID1A_c.2830C>T_p.Q944*_6	AACCCTCAGGGACCCCCAT	Non small cell carcinoma
ARID1A_c.3218G>A_p.W1073*	ARID1A_c.3218G>A_p.W1073*_3	CGCCATTTTTTGTTCTTGT	Non small cell carcinoma
ARID1A_c.3218G>A_p.W1073*	ARID1A_c.3218G>A_p.W1073*_2	GCCATTTTTTGTTCTTGTT	Non small cell carcinoma
ARID1A_c.3218G>A_p.W1073*	ARID1A_c.3218G>A_p.W1073*_6	TCCCGCCATTTTTTGTTCT	Non small cell carcinoma
ARID1A_c.3218G>A_p.W1073*	ARID1A_c.3218G>A_p.W1073*_4	CCGCCATTTTTTGTTCTTG	Non small cell carcinoma
ARID1A_c.3218G>A_p.W1073*	ARID1A_c.3218G>A_p.W1073*_5	CCCGCCATTTTTTGTTCTT	Non small cell carcinoma
ARID1A_c.3424C>T_p.Q1142*	ARID1A_c.3424C>T_p.Q1142*_5	CTATGCAGGGGCCCCAGAC	Hepatocellular carcinoma
ARID1A_c.3424C>T_p.Q1142*	ARID1A_c.3424C>T_p.Q1142*_4	TATGCAGGGGCCCCAGACT	Hepatocellular carcinoma
ARID1A_c.3424C>T_p.Q1142*	ARID1A_c.3424C>T_p.Q1142*_2	TGCAGGGGCCCCAGACTCC	Hepatocellular carcinoma
ARID1A_c.3424C>T_p.Q1142*	ARID1A_c.3424C>T_p.Q1142*_6	TCTATGCAGGGGCCCCAGA	Hepatocellular carcinoma
ARID1A_c.3424C>T_p.Q1142*	ARID1A_c.3424C>T_p.Q1142*_3	ATGCAGGGGCCCCAGACTC	Hepatocellular carcinoma
ARID1A_c.4435C>T_p.Q1479*	ARID1A_c.4435C>T_p.Q1479*_2	CACAAATGATGGGCGGCCC	Non small cell carcinoma
ARID1A_c.4435C>T_p.Q1479*	ARID1A_c.4435C>T_p.Q1479*_3	CCACAAATGATGGGCGGCC	Non small cell carcinoma
ARID1A_c.4435C>T_p.Q1479*	ARID1A_c.4435C>T_p.Q1479*_4	ACCACAAATGATGGGCGGC	Non small cell carcinoma
ARID1A_c.4435C>T_p.Q1479*	ARID1A_c.4435C>T_p.Q1479*_6	CCACCACAAATGATGGGCG	Non small cell carcinoma
ARID1A_c.4435C>T_p.Q1479*	ARID1A_c.4435C>T_p.Q1479*_5	CACCACAAATGATGGGCGG	Non small cell carcinoma
ARID1A_c.5296G>A_p.E1766K	ARID1A_c.5296G>A_p.E1766K_2	TTCTTCTTCTTCCCCACCC	Non small cell carcinoma
ARID1A_c.5296G>A_p.E1766K	ARID1A_c.5296G>A_p.E1766K_3	CTTCTTCTTCTTCCCCACC	Non small cell carcinoma
ARID1A_c.5296G>A_p.E1766K	ARID1A_c.5296G>A_p.E1766K_6	GTTCTTCTTCTTCTTCCCC	Non small cell carcinoma
ARID1A_c.5296G>A_p.E1766K	ARID1A_c.5296G>A_p.E1766K_4	TCTTCTTCTTCTTCCCCAC	Non small cell carcinoma
ARID1A_c.5296G>A_p.E1766K	ARID1A_c.5296G>A_p.E1766K_5	TTCTTCTTCTTCTTCCCCA	Non small cell carcinoma
ARID1A_c.6259G>A_p.G2087R	ARID1A_c.6259G>A_p.G2087R_3	GTCCGTCCAGGACAGGCAG	Non small cell carcinoma
ARID1A_c.6259G>A_p.G2087R	ARID1A_c.6259G>A_p.G2087R_2	TCCGTCCAGGACAGGCAGG	Non small cell carcinoma
ARID1A_c.6259G>A_p.G2087R	ARID1A_c.6259G>A_p.G2087R_4	AGTCCGTCCAGGACAGGCA	Non small cell carcinoma
ARID1A_c.6259G>A_p.G2087R	ARID1A_c.6259G>A_p.G2087R_5	GAGTCCGTCCAGGACAGGC	Non small cell carcinoma
ARID1A_c.6259G>A_p.G2087R	ARID1A_c.6259G>A_p.G2087R_6	GGAGTCCGTCCAGGACAGG	Non small cell carcinoma
SYTL1_c.1532G>A_p.R511H	SYTL1_c.1532G>A_p.R511H_2	GGCGTGTGCCCCCCAGCTG	BRCA_HER-positive carcinoma
SYTL1_c.1532G>A_p.R511H	SYTL1_c.1532G>A_p.R511H_6	CTGAGGCGTGTGCCCCCCA	BRCA_HER-positive carcinoma
SYTL1_c.1532G>A_p.R511H	SYTL1_c.1532G>A_p.R511H_3	AGGCGTGTGCCCCCCAGCT	BRCA_HER-positive carcinoma
SYTL1_c.1532G>A_p.R511H	SYTL1_c.1532G>A_p.R511H_4	GAGGCGTGTGCCCCCCAGC	BRCA_HER-positive carcinoma
SYTL1_c.1532G>A_p.R511H	SYTL1_c.1532G>A_p.R511H_5	TGAGGCGTGTGCCCCCCAG	BRCA_HER-positive carcinoma
FAM76A_c.200C>T_p.S67L	FAM76A_c.200C>T_p.S67L_5	AGGTTCAAGCGATTCTCCT	BRCA_HER-positive carcinoma
FAM76A_c.200C>T_p.S67L	FAM76A_c.200C>T_p.S67L_6	CAGGTTCAAGCGATTCTCC	BRCA_HER-positive carcinoma
FAM76A_c.200C>T_p.S67L	FAM76A_c.200C>T_p.S67L_2	TTCAAGCGATTCTCCTGCC	BRCA_HER-positive carcinoma
FAM76A_c.200C>T_p.S67L	FAM76A_c.200C>T_p.S67L_3	GTTCAAGCGATTCTCCTGC	BRCA_HER-positive carcinoma
FAM76A_c.200C>T_p.S67L	FAM76A_c.200C>T_p.S67L_4	GGTTCAAGCGATTCTCCTG	BRCA_HER-positive carcinoma
PTPRU_c.2237G>A_p.G746E	PTPRU_c.2237G>A_p.G746E_5	TAAGCCCCATCTCCTCCGA	Small cell carcinoma
PTPRU_c.2237G>A_p.G746E	PTPRU_c.2237G>A_p.G746E_2	GCCCCATCTCCTCCGATCT	Small cell carcinoma
PTPRU_c.2237G>A_p.G746E	PTPRU_c.2237G>A_p.G746E_3	AGCCCCATCTCCTCCGATC	Small cell carcinoma
PTPRU_c.2237G>A_p.G746E	PTPRU_c.2237G>A_p.G746E_4	AAGCCCCATCTCCTCCGAT	Small cell carcinoma
PTPRU_c.2237G>A_p.G746E	PTPRU_c.2237G>A_p.G746E_6	ATAAGCCCCATCTCCTCCG	Small cell carcinoma
PUM1_c.2701G>A_p.V901I	PUM1_c.2701G>A_p.V901I_4	ATGACGTAATTACCAAACA	BRCA_HER-positive carcinoma
PUM1_c.2701G>A_p.V901I	PUM1_c.2701G>A_p.V901I_2	GACGTAATTACCAAACACA	BRCA_HER-positive carcinoma
PUM1_c.2701G>A_p.V901I	PUM1_c.2701G>A_p.V901I_3	TGACGTAATTACCAAACAC	BRCA_HER-positive carcinoma
PUM1_c.2701G>A_p.V901I	PUM1_c.2701G>A_p.V901I_5	AATGACGTAATTACCAAAC	BRCA_HER-positive carcinoma
PUM1_c.2701G>A_p.V901I	PUM1_c.2701G>A_p.V901I_6	GAATGACGTAATTACCAAA	BRCA_HER-positive carcinoma
COL16A1_c.1087C>T_p.R363*	COL16A1_c.1087C>T_p.R363*_4	TGTTCGAATCTCCCCGGAT	BRCA_HER-positive carcinoma
COL16A1_c.1087C>T_p.R363*	COL16A1_c.1087C>T_p.R363*_5	GTGTTCGAATCTCCCCGGA	BRCA_HER-positive carcinoma
COL16A1_c.1087C>T_p.R363*	COL16A1_c.1087C>T_p.R363*_2	TTCGAATCTCCCCGGATGC	BRCA_HER-positive carcinoma
COL16A1_c.1087C>T_p.R363*	COL16A1_c.1087C>T_p.R363*_3	GTTCGAATCTCCCCGGATG	BRCA_HER-positive carcinoma
COL16A1_c.1087C>T_p.R363*	COL16A1_c.1087C>T_p.R363*_6	TGTGTTCGAATCTCCCCGG	BRCA_HER-positive carcinoma
KHDRBS1_c.328G>A_p.E110K	KHDRBS1_c.328G>A_p.E110K_2	CTCGGCCATGAGTTCGGGC	BRCA_HER-positive carcinoma
KHDRBS1_c.328G>A_p.E110K	KHDRBS1_c.328G>A_p.E110K_3	TCTCGGCCATGAGTTCGGG	BRCA_HER-positive carcinoma
KHDRBS1_c.328G>A_p.E110K	KHDRBS1_c.328G>A_p.E110K_4	TTCTCGGCCATGAGTTCGG	BRCA_HER-positive carcinoma
KHDRBS1_c.328G>A_p.E110K	KHDRBS1_c.328G>A_p.E110K_5	CTTCTCGGCCATGAGTTCG	BRCA_HER-positive carcinoma
KHDRBS1_c.328G>A_p.E110K	KHDRBS1_c.328G>A_p.E110K_6	CCTTCTCGGCCATGAGTTC	BRCA_HER-positive carcinoma
CSMD2_c.3636G>A_p.M1212I	CSMD2_c.3636G>A_p.M1212I_2	ATCATCTCAGAATGGCTAA	BRCA_HER-positive carcinoma
CSMD2_c.3636G>A_p.M1212I	CSMD2_c.3636G>A_p.M1212I_3	CATCATCTCAGAATGGCTA	BRCA_HER-positive carcinoma
CSMD2_c.3636G>A_p.M1212I	CSMD2_c.3636G>A_p.M1212I_6	CCCCATCATCTCAGAATGG	BRCA_HER-positive carcinoma
CSMD2_c.3636G>A_p.M1212I	CSMD2_c.3636G>A_p.M1212I_4	CCATCATCTCAGAATGGCT	BRCA_HER-positive carcinoma
CSMD2_c.3636G>A_p.M1212I	CSMD2_c.3636G>A_p.M1212I_5	CCCATCATCTCAGAATGGC	BRCA_HER-positive carcinoma
CSMD2_c.3347G>A_p.R1116H	CSMD2_c.3347G>A_p.R1116H_3	ATGCGGGCGGTGCCCTCCA	Hepatocellular carcinoma
CSMD2_c.3347G>A_p.R1116H	CSMD2_c.3347G>A_p.R1116H_2	TGCGGGCGGTGCCCTCCAG	Hepatocellular carcinoma
CSMD2_c.3347G>A_p.R1116H	CSMD2_c.3347G>A_p.R1116H_4	GATGCGGGCGGTGCCCTCC	Hepatocellular carcinoma
CSMD2_c.3347G>A_p.R1116H	CSMD2_c.3347G>A_p.R1116H_5	TGATGCGGGCGGTGCCCTC	Hepatocellular carcinoma
CSMD2_c.3347G>A_p.R1116H	CSMD2_c.3347G>A_p.R1116H_6	GTGATGCGGGCGGTGCCCT	Hepatocellular carcinoma
CSMD2_c.1348C>T_p.R450*	CSMD2_c.1348C>T_p.R450*_2	TTCGAGGCCCCTCGGGCAT	Small cell carcinoma
CSMD2_c.1348C>T_p.R450*	CSMD2_c.1348C>T_p.R450*_6	CACCTTCGAGGCCCCTCGG	Small cell carcinoma
CSMD2_c.1348C>T_p.R450*	CSMD2_c.1348C>T_p.R450*_3	CTTCGAGGCCCCTCGGGCA	Small cell carcinoma
CSMD2_c.1348C>T_p.R450*	CSMD2_c.1348C>T_p.R450*_4	CCTTCGAGGCCCCTCGGGC	Small cell carcinoma
CSMD2_c.1348C>T_p.R450*	CSMD2_c.1348C>T_p.R450*_5	ACCTTCGAGGCCCCTCGGG	Small cell carcinoma
PRDM16_c.3398G>A_p.S1133N	PRDM16_c.3398G>A_p.S1133N_5	CCAGGCTGTCCTCATCGTC	Non small cell carcinoma
PRDM16_c.3398G>A_p.S1133N	PRDM16_c.3398G>A_p.S1133N_6	GCCAGGCTGTCCTCATCGT	Non small cell carcinoma
PRDM16_c.3398G>A_p.S1133N	PRDM16_c.3398G>A_p.S1133N_2	GGCTGTCCTCATCGTCCTC	Non small cell carcinoma
PRDM16_c.3398G>A_p.S1133N	PRDM16_c.3398G>A_p.S1133N_3	AGGCTGTCCTCATCGTCCT	Non small cell carcinoma
PRDM16_c.3398G>A_p.S1133N	PRDM16_c.3398G>A_p.S1133N_4	CAGGCTGTCCTCATCGTCC	Non small cell carcinoma
AGO1_c.196C>T_p.R66C	AGO1_c.196C>T_p.R66C_5	GTCCCCGTAGAGTCAACCG	Small cell carcinoma
AGO1_c.196C>T_p.R66C	AGO1_c.196C>T_p.R66C_2	CCCGTAGAGTCAACCGGTA	Small cell carcinoma
AGO1_c.196C>T_p.R66C	AGO1_c.196C>T_p.R66C_3	CCCCGTAGAGTCAACCGGT	Small cell carcinoma
AGO1_c.196C>T_p.R66C	AGO1_c.196C>T_p.R66C_4	TCCCCGTAGAGTCAACCGG	Small cell carcinoma
AGO1_c.196C>T_p.R66C	AGO1_c.196C>T_p.R66C_6	TGTCCCCGTAGAGTCAACC	Small cell carcinoma
CCDC27_c.1372C>T_p.R458*	CCDC27_c.1372C>T_p.R458*_4	GCTGCGAAAGATCAATACG	BRCA_HER-positive carcinoma
CCDC27_c.1372C>T_p.R458*	CCDC27_c.1372C>T_p.R458*_2	TGCGAAAGATCAATACGGA	BRCA_HER-positive carcinoma
CCDC27_c.1372C>T_p.R458*	CCDC27_c.1372C>T_p.R458*_3	CTGCGAAAGATCAATACGG	BRCA_HER-positive carcinoma
CCDC27_c.1372C>T_p.R458*	CCDC27_c.1372C>T_p.R458*_5	AGCTGCGAAAGATCAATAC	BRCA_HER-positive carcinoma
CCDC27_c.1372C>T_p.R458*	CCDC27_c.1372C>T_p.R458*_6	CAGCTGCGAAAGATCAATA	BRCA_HER-positive carcinoma
GJA9_c.385C>T_p.R129W	GJA9_c.385C>T_p.R129W_4	GGATCGGAGGAGATTGGAG	Small cell carcinoma
GJA9_c.385C>T_p.R129W	GJA9_c.385C>T_p.R129W_5	GGGATCGGAGGAGATTGGA	Small cell carcinoma
GJA9_c.385C>T_p.R129W	GJA9_c.385C>T_p.R129W_2	ATCGGAGGAGATTGGAGCA	Small cell carcinoma
GJA9_c.385C>T_p.R129W	GJA9_c.385C>T_p.R129W_3	GATCGGAGGAGATTGGAGC	Small cell carcinoma
GJA9_c.385C>T_p.R129W	GJA9_c.385C>T_p.R129W_6	AGGGATCGGAGGAGATTGG	Small cell carcinoma
PABPC4_c.740C>T_p.A247V	PABPC4_c.740C>T_p.A247V_2	GGCTGTGGAAGAGATGAAT	Small cell carcinoma
PABPC4_c.740C>T_p.A247V	PABPC4_c.740C>T_p.A247V_3	AGGCTGTGGAAGAGATGAA	Small cell carcinoma
PABPC4_c.740C>T_p.A247V	PABPC4_c.740C>T_p.A247V_4	TAGGCTGTGGAAGAGATGA	Small cell carcinoma
PABPC4_c.740C>T_p.A247V	PABPC4_c.740C>T_p.A247V_5	CTAGGCTGTGGAAGAGATG	Small cell carcinoma
PABPC4_c.740C>T_p.A247V	PABPC4_c.740C>T_p.A247V_6	TCTAGGCTGTGGAAGAGAT	Small cell carcinoma
TRIT1_c.1235C>T_p.A412V	TRIT1_c.1235C>T_p.A412V_2	AGCGCACATAAAATCCAAA	Hepatocellular carcinoma
TRIT1_c.1235C>T_p.A412V	TRIT1_c.1235C>T_p.A412V_3	CAGCGCACATAAAATCCAA	Hepatocellular carcinoma
TRIT1_c.1235C>T_p.A412V	TRIT1_c.1235C>T_p.A412V_6	TATCAGCGCACATAAAATC	Hepatocellular carcinoma
TRIT1_c.1235C>T_p.A412V	TRIT1_c.1235C>T_p.A412V_4	TCAGCGCACATAAAATCCA	Hepatocellular carcinoma
TRIT1_c.1235C>T_p.A412V	TRIT1_c.1235C>T_p.A412V_5	ATCAGCGCACATAAAATCC	Hepatocellular carcinoma
TMEM269_c.289G>A_p.V97I	TMEM269_c.289G>A_p.V97I_3	AGACGGCAAAGTCATTCAG	Hepatocellular carcinoma
TMEM269_c.289G>A_p.V97I	TMEM269_c.289G>A_p.V97I_2	GACGGCAAAGTCATTCAGC	Hepatocellular carcinoma
TMEM269_c.289G>A_p.V97I	TMEM269_c.289G>A_p.V97I_4	AAGACGGCAAAGTCATTCA	Hepatocellular carcinoma
TMEM269_c.289G>A_p.V97I	TMEM269_c.289G>A_p.V97I_5	GAAGACGGCAAAGTCATTC	Hepatocellular carcinoma
TMEM269_c.289G>A_p.V97I	TMEM269_c.289G>A_p.V97I_6	TGAAGACGGCAAAGTCATT	Hepatocellular carcinoma
MPL_c.340G>A_p.V114M	MPL_c.340G>A_p.V114M_2	CACATTCTTCACCCAGAGG	BRCA_HER-positive carcinoma
MPL_c.340G>A_p.V114M	MPL_c.340G>A_p.V114M_6	GGAACACATTCTTCACCCA	BRCA_HER-positive carcinoma
MPL_c.340G>A_p.V114M	MPL_c.340G>A_p.V114M_3	ACACATTCTTCACCCAGAG	BRCA_HER-positive carcinoma
MPL_c.340G>A_p.V114M	MPL_c.340G>A_p.V114M_4	AACACATTCTTCACCCAGA	BRCA_HER-positive carcinoma
MPL_c.340G>A_p.V114M	MPL_c.340G>A_p.V114M_5	GAACACATTCTTCACCCAG	BRCA_HER-positive carcinoma
MPL_c.770G>A_p.R257H	MPL_c.770G>A_p.R257H_5	CGCTGCGCAGCTGCAGCCA	BRCA_HER-positive carcinoma
MPL_c.770G>A_p.R257H	MPL_c.770G>A_p.R257H_6	TCGCTGCGCAGCTGCAGCC	BRCA_HER-positive carcinoma
MPL_c.770G>A_p.R257H	MPL_c.770G>A_p.R257H_2	TGCGCAGCTGCAGCCAGTA	BRCA_HER-positive carcinoma
MPL_c.770G>A_p.R257H	MPL_c.770G>A_p.R257H_3	CTGCGCAGCTGCAGCCAGT	BRCA_HER-positive carcinoma
MPL_c.770G>A_p.R257H	MPL_c.770G>A_p.R257H_4	GCTGCGCAGCTGCAGCCAG	BRCA_HER-positive carcinoma
SZT2_c.8881G>A_p.G2961R	SZT2_c.8881G>A_p.G2961R_5	CTGCCCCATTGGGATTCGG	BRCA_Basal (triple-negative) carcinoma
SZT2_c.8881G>A_p.G2961R	SZT2_c.8881G>A_p.G2961R_2	CCCCATTGGGATTCGGGAA	BRCA_Basal (triple-negative) carcinoma
SZT2_c.8881G>A_p.G2961R	SZT2_c.8881G>A_p.G2961R_3	GCCCCATTGGGATTCGGGA	BRCA_Basal (triple-negative) carcinoma
SZT2_c.8881G>A_p.G2961R	SZT2_c.8881G>A_p.G2961R_4	TGCCCCATTGGGATTCGGG	BRCA_Basal (triple-negative) carcinoma
SZT2_c.8881G>A_p.G2961R	SZT2_c.8881G>A_p.G2961R_6	CCTGCCCCATTGGGATTCG	BRCA_Basal (triple-negative) carcinoma
PTPRF_c.1369C>T_p.R457C	PTPRF_c.1369C>T_p.R457C_4	CCGCCGCCCCCCGAACGCC	Hepatocellular carcinoma
PTPRF_c.1369C>T_p.R457C	PTPRF_c.1369C>T_p.R457C_2	GCCGCCCCCCGAACGCCTG	Hepatocellular carcinoma
PTPRF_c.1369C>T_p.R457C	PTPRF_c.1369C>T_p.R457C_3	CGCCGCCCCCCGAACGCCT	Hepatocellular carcinoma
PTPRF_c.1369C>T_p.R457C	PTPRF_c.1369C>T_p.R457C_5	CCCGCCGCCCCCCGAACGC	Hepatocellular carcinoma
PTPRF_c.1369C>T_p.R457C	PTPRF_c.1369C>T_p.R457C_6	TCCCGCCGCCCCCCGAACG	Hepatocellular carcinoma
MUTYH_c.1178G>A_p.G393D	MUTYH_c.1178G>A_p.G393D_6	AGCAGACCTGAGAGGGAGG	Non small cell carcinoma
MUTYH_c.1178G>A_p.G393D	MUTYH_c.1178G>A_p.G393D_5	GCAGACCTGAGAGGGAGGG	Non small cell carcinoma
MUTYH_c.1178G>A_p.G393D	MUTYH_c.1178G>A_p.G393D_2	GACCTGAGAGGGAGGGCAG	Non small cell carcinoma
MUTYH_c.1178G>A_p.G393D	MUTYH_c.1178G>A_p.G393D_3	AGACCTGAGAGGGAGGGCA	Non small cell carcinoma
MUTYH_c.1178G>A_p.G393D	MUTYH_c.1178G>A_p.G393D_4	CAGACCTGAGAGGGAGGGC	Non small cell carcinoma
NASP_c.716C>T_p.A239V	NASP_c.716C>T_p.A239V_4	GATGCTGAGGAAGAAAAAT	BRCA_HER-positive carcinoma
NASP_c.716C>T_p.A239V	NASP_c.716C>T_p.A239V_5	AGATGCTGAGGAAGAAAAA	BRCA_HER-positive carcinoma
NASP_c.716C>T_p.A239V	NASP_c.716C>T_p.A239V_6	CAGATGCTGAGGAAGAAAA	BRCA_HER-positive carcinoma
NASP_c.716C>T_p.A239V	NASP_c.716C>T_p.A239V_3	ATGCTGAGGAAGAAAAATC	BRCA_HER-positive carcinoma
NASP_c.716C>T_p.A239V	NASP_c.716C>T_p.A239V_2	TGCTGAGGAAGAAAAATCA	BRCA_HER-positive carcinoma
NASP_c.740G>A_p.G247E	NASP_c.740G>A_p.G247E_4	AGTTCCAGAAACTGATTTT	Hepatocellular carcinoma, BRCA_HER-positive carcinoma
NASP_c.740G>A_p.G247E	NASP_c.740G>A_p.G247E_5	CAGTTCCAGAAACTGATTT	Hepatocellular carcinoma, BRCA_HER-positive carcinoma
NASP_c.740G>A_p.G247E	NASP_c.740G>A_p.G247E_2	TTCCAGAAACTGATTTTTC	Hepatocellular carcinoma, BRCA_HER-positive carcinoma
NASP_c.740G>A_p.G247E	NASP_c.740G>A_p.G247E_3	GTTCCAGAAACTGATTTTT	Hepatocellular carcinoma, BRCA_HER-positive carcinoma
NASP_c.740G>A_p.G247E	NASP_c.740G>A_p.G247E_6	TCAGTTCCAGAAACTGATT	Hepatocellular carcinoma, BRCA_HER-positive carcinoma
DMBX1_c.236C>T_p.T79M	DMBX1_c.236C>T_p.T79M_3	TCACGGCTCAGCAGCTCGA	Hepatocellular carcinoma
DMBX1_c.236C>T_p.T79M	DMBX1_c.236C>T_p.T79M_4	TTCACGGCTCAGCAGCTCG	Hepatocellular carcinoma
DMBX1_c.236C>T_p.T79M	DMBX1_c.236C>T_p.T79M_5	GTTCACGGCTCAGCAGCTC	Hepatocellular carcinoma
DMBX1_c.236C>T_p.T79M	DMBX1_c.236C>T_p.T79M_2	CACGGCTCAGCAGCTCGAG	Hepatocellular carcinoma
DMBX1_c.236C>T_p.T79M	DMBX1_c.236C>T_p.T79M_6	CGTTCACGGCTCAGCAGCT	Hepatocellular carcinoma
ORC1_c.130G>A_p.E44K	ORC1_c.130G>A_p.E44K_3	TCTCGGTGGAACAACCTTC	BRCA_HER-positive carcinoma
ORC1_c.130G>A_p.E44K	ORC1_c.130G>A_p.E44K_4	ATCTCGGTGGAACAACCTT	BRCA_HER-positive carcinoma
ORC1_c.130G>A_p.E44K	ORC1_c.130G>A_p.E44K_2	CTCGGTGGAACAACCTTCT	BRCA_HER-positive carcinoma
ORC1_c.130G>A_p.E44K	ORC1_c.130G>A_p.E44K_5	AATCTCGGTGGAACAACCT	BRCA_HER-positive carcinoma
ORC1_c.130G>A_p.E44K	ORC1_c.130G>A_p.E44K_6	GAATCTCGGTGGAACAACC	BRCA_HER-positive carcinoma
DMRTB1_c.20G>A_p.R7H	DMRTB1_c.20G>A_p.R7H_2	TGCGCACCATTTTGTCGGC	Hepatocellular carcinoma
DMRTB1_c.20G>A_p.R7H	DMRTB1_c.20G>A_p.R7H_3	GTGCGCACCATTTTGTCGG	Hepatocellular carcinoma
DMRTB1_c.20G>A_p.R7H	DMRTB1_c.20G>A_p.R7H_6	GGGGTGCGCACCATTTTGT	Hepatocellular carcinoma
DMRTB1_c.20G>A_p.R7H	DMRTB1_c.20G>A_p.R7H_4	GGTGCGCACCATTTTGTCG	Hepatocellular carcinoma
DMRTB1_c.20G>A_p.R7H	DMRTB1_c.20G>A_p.R7H_5	GGGTGCGCACCATTTTGTC	Hepatocellular carcinoma
HOOK1_c.440C>T_p.S147F	HOOK1_c.440C>T_p.S147F_2	GTCTGTTCAACATGTGGTC	BRCA_HER-positive carcinoma
HOOK1_c.440C>T_p.S147F	HOOK1_c.440C>T_p.S147F_3	AGTCTGTTCAACATGTGGT	BRCA_HER-positive carcinoma
HOOK1_c.440C>T_p.S147F	HOOK1_c.440C>T_p.S147F_6	AAGAGTCTGTTCAACATGT	BRCA_HER-positive carcinoma
HOOK1_c.440C>T_p.S147F	HOOK1_c.440C>T_p.S147F_4	GAGTCTGTTCAACATGTGG	BRCA_HER-positive carcinoma
HOOK1_c.440C>T_p.S147F	HOOK1_c.440C>T_p.S147F_5	AGAGTCTGTTCAACATGTG	BRCA_HER-positive carcinoma
KCNAB2_c.46C>T_p.R16W	KCNAB2_c.46C>T_p.R16W_2	TGCGGCAGACGGGCTCCCC	BRCA_HER-positive carcinoma
KCNAB2_c.46C>T_p.R16W	KCNAB2_c.46C>T_p.R16W_5	CGCTGCGGCAGACGGGCTC	BRCA_HER-positive carcinoma
KCNAB2_c.46C>T_p.R16W	KCNAB2_c.46C>T_p.R16W_6	TCGCTGCGGCAGACGGGCT	BRCA_HER-positive carcinoma
KCNAB2_c.46C>T_p.R16W	KCNAB2_c.46C>T_p.R16W_3	CTGCGGCAGACGGGCTCCC	BRCA_HER-positive carcinoma
KCNAB2_c.46C>T_p.R16W	KCNAB2_c.46C>T_p.R16W_4	GCTGCGGCAGACGGGCTCC	BRCA_HER-positive carcinoma
L1TD1_c.2207C>T_p.S736L	L1TD1_c.2207C>T_p.S736L_5	AGGTTCAAGTCTTGAGATT	Hepatocellular carcinoma
L1TD1_c.2207C>T_p.S736L	L1TD1_c.2207C>T_p.S736L_6	AAGGTTCAAGTCTTGAGAT	Hepatocellular carcinoma
L1TD1_c.2207C>T_p.S736L	L1TD1_c.2207C>T_p.S736L_2	TTCAAGTCTTGAGATTGTC	Hepatocellular carcinoma
L1TD1_c.2207C>T_p.S736L	L1TD1_c.2207C>T_p.S736L_3	GTTCAAGTCTTGAGATTGT	Hepatocellular carcinoma
L1TD1_c.2207C>T_p.S736L	L1TD1_c.2207C>T_p.S736L_4	GGTTCAAGTCTTGAGATTG	Hepatocellular carcinoma
GPR153_c.234G>A_p.W78*	GPR153_c.234G>A_p.W78*_2	TTCCACTCGAAGTCGGGGC	Hepatocellular carcinoma
GPR153_c.234G>A_p.W78*	GPR153_c.234G>A_p.W78*_6	CTCATTCCACTCGAAGTCG	Hepatocellular carcinoma
GPR153_c.234G>A_p.W78*	GPR153_c.234G>A_p.W78*_3	ATTCCACTCGAAGTCGGGG	Hepatocellular carcinoma
GPR153_c.234G>A_p.W78*	GPR153_c.234G>A_p.W78*_4	CATTCCACTCGAAGTCGGG	Hepatocellular carcinoma
GPR153_c.234G>A_p.W78*	GPR153_c.234G>A_p.W78*_5	TCATTCCACTCGAAGTCGG	Hepatocellular carcinoma
ESPN_c.2486C>T_p.T829M	ESPN_c.2486C>T_p.T829M_5	GCGGACGCTGGGCTACGAT	Non small cell carcinoma
ESPN_c.2486C>T_p.T829M	ESPN_c.2486C>T_p.T829M_2	GACGCTGGGCTACGATGAG	Non small cell carcinoma
ESPN_c.2486C>T_p.T829M	ESPN_c.2486C>T_p.T829M_3	GGACGCTGGGCTACGATGA	Non small cell carcinoma
ESPN_c.2486C>T_p.T829M	ESPN_c.2486C>T_p.T829M_4	CGGACGCTGGGCTACGATG	Non small cell carcinoma
ESPN_c.2486C>T_p.T829M	ESPN_c.2486C>T_p.T829M_6	TGCGGACGCTGGGCTACGA	Non small cell carcinoma
LEPR_c.2096C>T_p.T699M	LEPR_c.2096C>T_p.T699M_3	ACACGAAATTCACTTTCCT	Non small cell carcinoma
LEPR_c.2096C>T_p.T699M	LEPR_c.2096C>T_p.T699M_4	CACACGAAATTCACTTTCC	Non small cell carcinoma
LEPR_c.2096C>T_p.T699M	LEPR_c.2096C>T_p.T699M_5	TCACACGAAATTCACTTTC	Non small cell carcinoma
LEPR_c.2096C>T_p.T699M	LEPR_c.2096C>T_p.T699M_2	CACGAAATTCACTTTCCTG	Non small cell carcinoma
LEPR_c.2096C>T_p.T699M	LEPR_c.2096C>T_p.T699M_6	ATCACACGAAATTCACTTT	Non small cell carcinoma
TAS1R1_c.509C>T_p.A170V	TAS1R1_c.509C>T_p.A170V_3	ATGCGGCCAGCAGCGAGAC	Hepatocellular carcinoma
TAS1R1_c.509C>T_p.A170V	TAS1R1_c.509C>T_p.A170V_4	TATGCGGCCAGCAGCGAGA	Hepatocellular carcinoma
TAS1R1_c.509C>T_p.A170V	TAS1R1_c.509C>T_p.A170V_2	TGCGGCCAGCAGCGAGACG	Hepatocellular carcinoma
TAS1R1_c.509C>T_p.A170V	TAS1R1_c.509C>T_p.A170V_5	CTATGCGGCCAGCAGCGAG	Hepatocellular carcinoma
TAS1R1_c.509C>T_p.A170V	TAS1R1_c.509C>T_p.A170V_6	GCTATGCGGCCAGCAGCGA	Hepatocellular carcinoma
TNNI3K_c.958G>A_p.D320N	TNNI3K_c.958G>A_p.D320N_2	GTCAATGCTCTTGCCATAG	BRCA_HER-positive carcinoma
TNNI3K_c.958G>A_p.D320N	TNNI3K_c.958G>A_p.D320N_3	GGTCAATGCTCTTGCCATA	BRCA_HER-positive carcinoma
TNNI3K_c.958G>A_p.D320N	TNNI3K_c.958G>A_p.D320N_6	CTAGGTCAATGCTCTTGCC	BRCA_HER-positive carcinoma
TNNI3K_c.958G>A_p.D320N	TNNI3K_c.958G>A_p.D320N_4	AGGTCAATGCTCTTGCCAT	BRCA_HER-positive carcinoma
TNNI3K_c.958G>A_p.D320N	TNNI3K_c.958G>A_p.D320N_5	TAGGTCAATGCTCTTGCCA	BRCA_HER-positive carcinoma
CAMTA1_c.4003G>A_p.V1335M	CAMTA1_c.4003G>A_p.V1335M_2	CACCTGTACTGTAGACACA	Hepatocellular carcinoma
CAMTA1_c.4003G>A_p.V1335M	CAMTA1_c.4003G>A_p.V1335M_3	TCACCTGTACTGTAGACAC	Hepatocellular carcinoma
CAMTA1_c.4003G>A_p.V1335M	CAMTA1_c.4003G>A_p.V1335M_6	CAGTCACCTGTACTGTAGA	Hepatocellular carcinoma
CAMTA1_c.4003G>A_p.V1335M	CAMTA1_c.4003G>A_p.V1335M_4	GTCACCTGTACTGTAGACA	Hepatocellular carcinoma
CAMTA1_c.4003G>A_p.V1335M	CAMTA1_c.4003G>A_p.V1335M_5	AGTCACCTGTACTGTAGAC	Hepatocellular carcinoma
MIGA1_c.290G>A_p.R97H	MIGA1_c.290G>A_p.R97H_2	CACGTTTTCTTTTAAAGTG	Hepatocellular carcinoma
MIGA1_c.290G>A_p.R97H	MIGA1_c.290G>A_p.R97H_5	TTCCACGTTTTCTTTTAAA	Hepatocellular carcinoma
MIGA1_c.290G>A_p.R97H	MIGA1_c.290G>A_p.R97H_6	TTTCCACGTTTTCTTTTAA	Hepatocellular carcinoma
MIGA1_c.290G>A_p.R97H	MIGA1_c.290G>A_p.R97H_3	CCACGTTTTCTTTTAAAGT	Hepatocellular carcinoma
MIGA1_c.290G>A_p.R97H	MIGA1_c.290G>A_p.R97H_4	TCCACGTTTTCTTTTAAAG	Hepatocellular carcinoma
PER3_c.929G>A_p.S310N	PER3_c.929G>A_p.S310N_5	GGTAGCTTAGGATCGATGT	Hepatocellular carcinoma
PER3_c.929G>A_p.S310N	PER3_c.929G>A_p.S310N_6	AGGTAGCTTAGGATCGATG	Hepatocellular carcinoma
PER3_c.929G>A_p.S310N	PER3_c.929G>A_p.S310N_2	AGCTTAGGATCGATGTTCC	Hepatocellular carcinoma
PER3_c.929G>A_p.S310N	PER3_c.929G>A_p.S310N_3	TAGCTTAGGATCGATGTTC	Hepatocellular carcinoma
PER3_c.929G>A_p.S310N	PER3_c.929G>A_p.S310N_4	GTAGCTTAGGATCGATGTT	Hepatocellular carcinoma
ADGRL4_c.1205G>A_p.R402H	ADGRL4_c.1205G>A_p.R402H_2	AGCGGCATGAGGTGTGGGT	Hepatocellular carcinoma
ADGRL4_c.1205G>A_p.R402H	ADGRL4_c.1205G>A_p.R402H_6	TTACAGCGGCATGAGGTGT	Hepatocellular carcinoma
ADGRL4_c.1205G>A_p.R402H	ADGRL4_c.1205G>A_p.R402H_3	CAGCGGCATGAGGTGTGGG	Hepatocellular carcinoma
ADGRL4_c.1205G>A_p.R402H	ADGRL4_c.1205G>A_p.R402H_4	ACAGCGGCATGAGGTGTGG	Hepatocellular carcinoma
ADGRL4_c.1205G>A_p.R402H	ADGRL4_c.1205G>A_p.R402H_5	TACAGCGGCATGAGGTGTG	Hepatocellular carcinoma
ADGRL2_c.148C>T_p.R50*	ADGRL2_c.148C>T_p.R50*_5	ATCTGCGATGCCCGGGCAG	BRCA_Basal (triple-negative) carcinoma
ADGRL2_c.148C>T_p.R50*	ADGRL2_c.148C>T_p.R50*_2	TGCGATGCCCGGGCAGTGA	BRCA_Basal (triple-negative) carcinoma
ADGRL2_c.148C>T_p.R50*	ADGRL2_c.148C>T_p.R50*_3	CTGCGATGCCCGGGCAGTG	BRCA_Basal (triple-negative) carcinoma
ADGRL2_c.148C>T_p.R50*	ADGRL2_c.148C>T_p.R50*_4	TCTGCGATGCCCGGGCAGT	BRCA_Basal (triple-negative) carcinoma
ADGRL2_c.148C>T_p.R50*	ADGRL2_c.148C>T_p.R50*_6	GATCTGCGATGCCCGGGCA	BRCA_Basal (triple-negative) carcinoma
SLC45A1_c.1315C>T_p.P439S	SLC45A1_c.1315C>T_p.P439S_3	TTCCCCCGGGCCCCCGACG	Hepatocellular carcinoma
SLC45A1_c.1315C>T_p.P439S	SLC45A1_c.1315C>T_p.P439S_4	CTTCCCCCGGGCCCCCGAC	Hepatocellular carcinoma
SLC45A1_c.1315C>T_p.P439S	SLC45A1_c.1315C>T_p.P439S_5	GCTTCCCCCGGGCCCCCGA	Hepatocellular carcinoma
SLC45A1_c.1315C>T_p.P439S	SLC45A1_c.1315C>T_p.P439S_2	TCCCCCGGGCCCCCGACGG	Hepatocellular carcinoma
SLC45A1_c.1315C>T_p.P439S	SLC45A1_c.1315C>T_p.P439S_6	AGCTTCCCCCGGGCCCCCG	Hepatocellular carcinoma
SLC2A7_c.109C>T_p.Q37*	SLC2A7_c.109C>T_p.Q37*_3	TTCCAGTACGGCTACAACC	Hepatocellular carcinoma
SLC2A7_c.109C>T_p.Q37*	SLC2A7_c.109C>T_p.Q37*_4	CTTCCAGTACGGCTACAAC	Hepatocellular carcinoma
SLC2A7_c.109C>T_p.Q37*	SLC2A7_c.109C>T_p.Q37*_2	TCCAGTACGGCTACAACCT	Hepatocellular carcinoma
SLC2A7_c.109C>T_p.Q37*	SLC2A7_c.109C>T_p.Q37*_5	CCTTCCAGTACGGCTACAA	Hepatocellular carcinoma
SLC2A7_c.109C>T_p.Q37*	SLC2A7_c.109C>T_p.Q37*_6	GCCTTCCAGTACGGCTACA	Hepatocellular carcinoma
CDC7_c.1139G>A_p.R380K	CDC7_c.1139G>A_p.R380K_2	CTCTGAATCCTGGTGTACC	Hepatocellular carcinoma
CDC7_c.1139G>A_p.R380K	CDC7_c.1139G>A_p.R380K_3	GCTCTGAATCCTGGTGTAC	Hepatocellular carcinoma
CDC7_c.1139G>A_p.R380K	CDC7_c.1139G>A_p.R380K_6	GGTGCTCTGAATCCTGGTG	Hepatocellular carcinoma
CDC7_c.1139G>A_p.R380K	CDC7_c.1139G>A_p.R380K_4	TGCTCTGAATCCTGGTGTA	Hepatocellular carcinoma
CDC7_c.1139G>A_p.R380K	CDC7_c.1139G>A_p.R380K_5	GTGCTCTGAATCCTGGTGT	Hepatocellular carcinoma
BRDT_c.874C>T_p.H292Y	BRDT_c.874C>T_p.H292Y_2	AACATTTTTCATATGCATG	Non small cell carcinoma
BRDT_c.874C>T_p.H292Y	BRDT_c.874C>T_p.H292Y_3	AAACATTTTTCATATGCAT	Non small cell carcinoma
BRDT_c.874C>T_p.H292Y	BRDT_c.874C>T_p.H292Y_6	AAGAAACATTTTTCATATG	Non small cell carcinoma
BRDT_c.874C>T_p.H292Y	BRDT_c.874C>T_p.H292Y_4	GAAACATTTTTCATATGCA	Non small cell carcinoma
BRDT_c.874C>T_p.H292Y	BRDT_c.874C>T_p.H292Y_5	AGAAACATTTTTCATATGC	Non small cell carcinoma
ARHGAP29_c.3119G>A_p.G1040E	ARHGAP29_c.3119G>A_p.G1040E_2	TTCCCATATTTCTGCCATT	Non small cell carcinoma
ARHGAP29_c.3119G>A_p.G1040E	ARHGAP29_c.3119G>A_p.G1040E_5	CATTTCCCATATTTCTGCC	Non small cell carcinoma
ARHGAP29_c.3119G>A_p.G1040E	ARHGAP29_c.3119G>A_p.G1040E_6	ACATTTCCCATATTTCTGC	Non small cell carcinoma
ARHGAP29_c.3119G>A_p.G1040E	ARHGAP29_c.3119G>A_p.G1040E_3	TTTCCCATATTTCTGCCAT	Non small cell carcinoma
ARHGAP29_c.3119G>A_p.G1040E	ARHGAP29_c.3119G>A_p.G1040E_4	ATTTCCCATATTTCTGCCA	Non small cell carcinoma
ARHGAP29_c.1633G>A_p.G545R	ARHGAP29_c.1633G>A_p.G545R_6	TCCCTCCAGTGCTCTCAGA	Non small cell carcinoma
ARHGAP29_c.1633G>A_p.G545R	ARHGAP29_c.1633G>A_p.G545R_5	CCCTCCAGTGCTCTCAGAA	Non small cell carcinoma
ARHGAP29_c.1633G>A_p.G545R	ARHGAP29_c.1633G>A_p.G545R_2	TCCAGTGCTCTCAGAATCA	Non small cell carcinoma
ARHGAP29_c.1633G>A_p.G545R	ARHGAP29_c.1633G>A_p.G545R_3	CTCCAGTGCTCTCAGAATC	Non small cell carcinoma
ARHGAP29_c.1633G>A_p.G545R	ARHGAP29_c.1633G>A_p.G545R_4	CCTCCAGTGCTCTCAGAAT	Non small cell carcinoma
CHUK_c.427C>T_p.R143*	CHUK_c.427C>T_p.R143*_3	CATCGAGATCTAAAACCTG	Non small cell carcinoma
CHUK_c.427C>T_p.R143*	CHUK_c.427C>T_p.R143*_2	ATCGAGATCTAAAACCTGA	Non small cell carcinoma
CHUK_c.427C>T_p.R143*	CHUK_c.427C>T_p.R143*_4	ACATCGAGATCTAAAACCT	Non small cell carcinoma
CHUK_c.427C>T_p.R143*	CHUK_c.427C>T_p.R143*_5	TACATCGAGATCTAAAACC	Non small cell carcinoma
CHUK_c.427C>T_p.R143*	CHUK_c.427C>T_p.R143*_6	ATACATCGAGATCTAAAAC	Non small cell carcinoma
SEMA4G_c.1939C>T_p.P647S	SEMA4G_c.1939C>T_p.P647S_2	TGCCACATCCTATCTGGTC	Hepatocellular carcinoma
SEMA4G_c.1939C>T_p.P647S	SEMA4G_c.1939C>T_p.P647S_3	TTGCCACATCCTATCTGGT	Hepatocellular carcinoma
SEMA4G_c.1939C>T_p.P647S	SEMA4G_c.1939C>T_p.P647S_4	ATTGCCACATCCTATCTGG	Hepatocellular carcinoma
SEMA4G_c.1939C>T_p.P647S	SEMA4G_c.1939C>T_p.P647S_5	AATTGCCACATCCTATCTG	Hepatocellular carcinoma
SEMA4G_c.1939C>T_p.P647S	SEMA4G_c.1939C>T_p.P647S_6	CAATTGCCACATCCTATCT	Hepatocellular carcinoma
PDZD7_c.2300G>A_p.R767Q	PDZD7_c.2300G>A_p.R767Q_4	GCCCCGGATCTGGCTCTGC	Hepatocellular carcinoma
PDZD7_c.2300G>A_p.R767Q	PDZD7_c.2300G>A_p.R767Q_5	GGCCCCGGATCTGGCTCTG	Hepatocellular carcinoma
PDZD7_c.2300G>A_p.R767Q	PDZD7_c.2300G>A_p.R767Q_6	CGGCCCCGGATCTGGCTCT	Hepatocellular carcinoma
PDZD7_c.2300G>A_p.R767Q	PDZD7_c.2300G>A_p.R767Q_2	CCCGGATCTGGCTCTGCGG	Hepatocellular carcinoma
PDZD7_c.2300G>A_p.R767Q	PDZD7_c.2300G>A_p.R767Q_3	CCCCGGATCTGGCTCTGCG	Hepatocellular carcinoma
NOLC1_c.19C>T_p.R7C	NOLC1_c.19C>T_p.R7C_4	CATTCGCCGCGTGGTTCCC	BRCA_HER-positive carcinoma
NOLC1_c.19C>T_p.R7C	NOLC1_c.19C>T_p.R7C_5	GCATTCGCCGCGTGGTTCC	BRCA_HER-positive carcinoma
NOLC1_c.19C>T_p.R7C	NOLC1_c.19C>T_p.R7C_2	TTCGCCGCGTGGTTCCCAG	BRCA_HER-positive carcinoma
NOLC1_c.19C>T_p.R7C	NOLC1_c.19C>T_p.R7C_3	ATTCGCCGCGTGGTTCCCA	BRCA_HER-positive carcinoma
NOLC1_c.19C>T_p.R7C	NOLC1_c.19C>T_p.R7C_6	GGCATTCGCCGCGTGGTTC	BRCA_HER-positive carcinoma
NOLC1_c.116G>A_p.G39E	NOLC1_c.116G>A_p.G39E_3	GCTCCTGTCGCTTTGGCGA	BRCA_HER-positive carcinoma
NOLC1_c.116G>A_p.G39E	NOLC1_c.116G>A_p.G39E_4	AGCTCCTGTCGCTTTGGCG	BRCA_HER-positive carcinoma
NOLC1_c.116G>A_p.G39E	NOLC1_c.116G>A_p.G39E_2	CTCCTGTCGCTTTGGCGAA	BRCA_HER-positive carcinoma
NOLC1_c.116G>A_p.G39E	NOLC1_c.116G>A_p.G39E_6	ACAGCTCCTGTCGCTTTGG	BRCA_HER-positive carcinoma
NOLC1_c.116G>A_p.G39E	NOLC1_c.116G>A_p.G39E_5	CAGCTCCTGTCGCTTTGGC	BRCA_HER-positive carcinoma
CNNM2_c.2300G>A_p.R767Q	CNNM2_c.2300G>A_p.R767Q_3	ATCCGGTCGCTTCGACTGA	BRCA_HER-positive carcinoma
CNNM2_c.2300G>A_p.R767Q	CNNM2_c.2300G>A_p.R767Q_4	AATCCGGTCGCTTCGACTG	BRCA_HER-positive carcinoma
CNNM2_c.2300G>A_p.R767Q	CNNM2_c.2300G>A_p.R767Q_2	TCCGGTCGCTTCGACTGAG	BRCA_HER-positive carcinoma
CNNM2_c.2300G>A_p.R767Q	CNNM2_c.2300G>A_p.R767Q_5	CAATCCGGTCGCTTCGACT	BRCA_HER-positive carcinoma
CNNM2_c.2300G>A_p.R767Q	CNNM2_c.2300G>A_p.R767Q_6	TCAATCCGGTCGCTTCGAC	BRCA_HER-positive carcinoma
GSTO2_c.436G>A_p.A146T	GSTO2_c.436G>A_p.A146T_2	GGCTGCCTTCAGATTAGTG	Hepatocellular carcinoma
GSTO2_c.436G>A_p.A146T	GSTO2_c.436G>A_p.A146T_3	GGGCTGCCTTCAGATTAGT	Hepatocellular carcinoma
GSTO2_c.436G>A_p.A146T	GSTO2_c.436G>A_p.A146T_6	GCAGGGCTGCCTTCAGATT	Hepatocellular carcinoma
GSTO2_c.436G>A_p.A146T	GSTO2_c.436G>A_p.A146T_4	AGGGCTGCCTTCAGATTAG	Hepatocellular carcinoma
GSTO2_c.436G>A_p.A146T	GSTO2_c.436G>A_p.A146T_5	CAGGGCTGCCTTCAGATTA	Hepatocellular carcinoma
SORCS3_c.2380C>T_p.R794W	SORCS3_c.2380C>T_p.R794W_2	ATCGGCGGATTGTGTCCAA	BRCA_HER-positive carcinoma
SORCS3_c.2380C>T_p.R794W	SORCS3_c.2380C>T_p.R794W_6	AGGTATCGGCGGATTGTGT	BRCA_HER-positive carcinoma
SORCS3_c.2380C>T_p.R794W	SORCS3_c.2380C>T_p.R794W_5	GGTATCGGCGGATTGTGTC	BRCA_HER-positive carcinoma
SORCS3_c.2380C>T_p.R794W	SORCS3_c.2380C>T_p.R794W_3	TATCGGCGGATTGTGTCCA	BRCA_HER-positive carcinoma
SORCS3_c.2380C>T_p.R794W	SORCS3_c.2380C>T_p.R794W_4	GTATCGGCGGATTGTGTCC	BRCA_HER-positive carcinoma
SORCS1_c.3374G>A_p.R1125K	SORCS1_c.3374G>A_p.R1125K_3	ACTCTCCTAAGAGAAAACG	Hepatocellular carcinoma
SORCS1_c.3374G>A_p.R1125K	SORCS1_c.3374G>A_p.R1125K_2	CTCTCCTAAGAGAAAACGT	Hepatocellular carcinoma
SORCS1_c.3374G>A_p.R1125K	SORCS1_c.3374G>A_p.R1125K_4	TACTCTCCTAAGAGAAAAC	Hepatocellular carcinoma
SORCS1_c.3374G>A_p.R1125K	SORCS1_c.3374G>A_p.R1125K_5	CTACTCTCCTAAGAGAAAA	Hepatocellular carcinoma
SORCS1_c.3374G>A_p.R1125K	SORCS1_c.3374G>A_p.R1125K_6	GCTACTCTCCTAAGAGAAA	Hepatocellular carcinoma
ZDHHC6_c.517C>T_p.R173W	ZDHHC6_c.517C>T_p.R173W_2	ATCGGGTAAGTGAAAATGA	BRCA_HER-positive carcinoma
ZDHHC6_c.517C>T_p.R173W	ZDHHC6_c.517C>T_p.R173W_6	TATCATCGGGTAAGTGAAA	BRCA_HER-positive carcinoma
ZDHHC6_c.517C>T_p.R173W	ZDHHC6_c.517C>T_p.R173W_3	CATCGGGTAAGTGAAAATG	BRCA_HER-positive carcinoma
ZDHHC6_c.517C>T_p.R173W	ZDHHC6_c.517C>T_p.R173W_4	TCATCGGGTAAGTGAAAAT	BRCA_HER-positive carcinoma
ZDHHC6_c.517C>T_p.R173W	ZDHHC6_c.517C>T_p.R173W_5	ATCATCGGGTAAGTGAAAA	BRCA_HER-positive carcinoma
VTI1A_c.640G>A_p.V214I	VTI1A_c.640G>A_p.V214I_4	CTGACAGAAAAAGTGATCG	BRCA_HER-positive carcinoma
VTI1A_c.640G>A_p.V214I	VTI1A_c.640G>A_p.V214I_5	TCTGACAGAAAAAGTGATC	BRCA_HER-positive carcinoma
VTI1A_c.640G>A_p.V214I	VTI1A_c.640G>A_p.V214I_6	TTCTGACAGAAAAAGTGAT	BRCA_HER-positive carcinoma
VTI1A_c.640G>A_p.V214I	VTI1A_c.640G>A_p.V214I_2	GACAGAAAAAGTGATCGCC	BRCA_HER-positive carcinoma
VTI1A_c.640G>A_p.V214I	VTI1A_c.640G>A_p.V214I_3	TGACAGAAAAAGTGATCGC	BRCA_HER-positive carcinoma
TCF7L2_c.1411C>T_p.R471C	TCF7L2_c.1411C>T_p.R471C_4	CGTTCGCTACATACAAGGT	CRC_Adenocarcinoma
TCF7L2_c.1411C>T_p.R471C	TCF7L2_c.1411C>T_p.R471C_5	GCGTTCGCTACATACAAGG	CRC_Adenocarcinoma
TCF7L2_c.1411C>T_p.R471C	TCF7L2_c.1411C>T_p.R471C_2	TTCGCTACATACAAGGTGA	CRC_Adenocarcinoma
TCF7L2_c.1411C>T_p.R471C	TCF7L2_c.1411C>T_p.R471C_3	GTTCGCTACATACAAGGTG	CRC_Adenocarcinoma
TCF7L2_c.1411C>T_p.R471C	TCF7L2_c.1411C>T_p.R471C_6	TGCGTTCGCTACATACAAG	CRC_Adenocarcinoma
CELF2_c.1157C>T_p.T386M	CELF2_c.1157C>T_p.T386M_3	TGACGAATGGCACGGCTGG	Hepatocellular carcinoma
CELF2_c.1157C>T_p.T386M	CELF2_c.1157C>T_p.T386M_4	TTGACGAATGGCACGGCTG	Hepatocellular carcinoma
CELF2_c.1157C>T_p.T386M	CELF2_c.1157C>T_p.T386M_2	GACGAATGGCACGGCTGGC	Hepatocellular carcinoma
CELF2_c.1157C>T_p.T386M	CELF2_c.1157C>T_p.T386M_6	GCTTGACGAATGGCACGGC	Hepatocellular carcinoma
CELF2_c.1157C>T_p.T386M	CELF2_c.1157C>T_p.T386M_5	CTTGACGAATGGCACGGCT	Hepatocellular carcinoma
CASP7_c.484C>T_p.R162C	CASP7_c.484C>T_p.R162C_3	CGGCGTGATCTCGGAAGAC	BRCA_HER-positive carcinoma
CASP7_c.484C>T_p.R162C	CASP7_c.484C>T_p.R162C_4	GCGGCGTGATCTCGGAAGA	BRCA_HER-positive carcinoma
CASP7_c.484C>T_p.R162C	CASP7_c.484C>T_p.R162C_2	GGCGTGATCTCGGAAGACT	BRCA_HER-positive carcinoma
CASP7_c.484C>T_p.R162C	CASP7_c.484C>T_p.R162C_5	AGCGGCGTGATCTCGGAAG	BRCA_HER-positive carcinoma
CASP7_c.484C>T_p.R162C	CASP7_c.484C>T_p.R162C_6	CAGCGGCGTGATCTCGGAA	BRCA_HER-positive carcinoma
PLEKHS1_c.337G>A_p.D113N	PLEKHS1_c.337G>A_p.D113N_2	GTCGTGGCCAATGAGGAAG	Hepatocellular carcinoma
PLEKHS1_c.337G>A_p.D113N	PLEKHS1_c.337G>A_p.D113N_3	TGTCGTGGCCAATGAGGAA	Hepatocellular carcinoma
PLEKHS1_c.337G>A_p.D113N	PLEKHS1_c.337G>A_p.D113N_6	ACCTGTCGTGGCCAATGAG	Hepatocellular carcinoma
PLEKHS1_c.337G>A_p.D113N	PLEKHS1_c.337G>A_p.D113N_4	CTGTCGTGGCCAATGAGGA	Hepatocellular carcinoma
PLEKHS1_c.337G>A_p.D113N	PLEKHS1_c.337G>A_p.D113N_5	CCTGTCGTGGCCAATGAGG	Hepatocellular carcinoma
PNLIP_c.634G>A_p.D212N	PNLIP_c.634G>A_p.D212N_2	ATCGCTGGGGTCCAATCGG	BRCA_HER-positive carcinoma
PNLIP_c.634G>A_p.D212N	PNLIP_c.634G>A_p.D212N_6	TGGCATCGCTGGGGTCCAA	BRCA_HER-positive carcinoma
PNLIP_c.634G>A_p.D212N	PNLIP_c.634G>A_p.D212N_5	GGCATCGCTGGGGTCCAAT	BRCA_HER-positive carcinoma
PNLIP_c.634G>A_p.D212N	PNLIP_c.634G>A_p.D212N_3	CATCGCTGGGGTCCAATCG	BRCA_HER-positive carcinoma
PNLIP_c.634G>A_p.D212N	PNLIP_c.634G>A_p.D212N_4	GCATCGCTGGGGTCCAATC	BRCA_HER-positive carcinoma
KCNK18_c.755C>T_p.S252L	KCNK18_c.755C>T_p.S252L_3	ACTCGTGTCCCGAACTGGT	BRCA_HER-positive carcinoma
KCNK18_c.755C>T_p.S252L	KCNK18_c.755C>T_p.S252L_2	CTCGTGTCCCGAACTGGTG	BRCA_HER-positive carcinoma
KCNK18_c.755C>T_p.S252L	KCNK18_c.755C>T_p.S252L_4	AACTCGTGTCCCGAACTGG	BRCA_HER-positive carcinoma
KCNK18_c.755C>T_p.S252L	KCNK18_c.755C>T_p.S252L_5	TAACTCGTGTCCCGAACTG	BRCA_HER-positive carcinoma
KCNK18_c.755C>T_p.S252L	KCNK18_c.755C>T_p.S252L_6	GTAACTCGTGTCCCGAACT	BRCA_HER-positive carcinoma
PRDX3_c.664G>A_p.V222I	PRDX3_c.664G>A_p.V222I_2	TACATACTGGAACGCCTTC	Hepatocellular carcinoma
PRDX3_c.664G>A_p.V222I	PRDX3_c.664G>A_p.V222I_6	TTTCTACATACTGGAACGC	Hepatocellular carcinoma
PRDX3_c.664G>A_p.V222I	PRDX3_c.664G>A_p.V222I_3	CTACATACTGGAACGCCTT	Hepatocellular carcinoma
PRDX3_c.664G>A_p.V222I	PRDX3_c.664G>A_p.V222I_4	TCTACATACTGGAACGCCT	Hepatocellular carcinoma
PRDX3_c.664G>A_p.V222I	PRDX3_c.664G>A_p.V222I_5	TTCTACATACTGGAACGCC	Hepatocellular carcinoma
ADARB2_c.1630G>A_p.V544I	ADARB2_c.1630G>A_p.V544I_4	AGGACGCCGTCCCAGGTCT	BRCA_HER-positive carcinoma
ADARB2_c.1630G>A_p.V544I	ADARB2_c.1630G>A_p.V544I_5	CAGGACGCCGTCCCAGGTC	BRCA_HER-positive carcinoma
ADARB2_c.1630G>A_p.V544I	ADARB2_c.1630G>A_p.V544I_6	GCAGGACGCCGTCCCAGGT	BRCA_HER-positive carcinoma
ADARB2_c.1630G>A_p.V544I	ADARB2_c.1630G>A_p.V544I_2	GACGCCGTCCCAGGTCTGC	BRCA_HER-positive carcinoma
ADARB2_c.1630G>A_p.V544I	ADARB2_c.1630G>A_p.V544I_3	GGACGCCGTCCCAGGTCTG	BRCA_HER-positive carcinoma
ZRANB1_c.236C>T_p.S79L	ZRANB1_c.236C>T_p.S79L_4	TCTTCGTATAGCATGGAAA	Hepatocellular carcinoma
ZRANB1_c.236C>T_p.S79L	ZRANB1_c.236C>T_p.S79L_5	ATCTTCGTATAGCATGGAA	Hepatocellular carcinoma
ZRANB1_c.236C>T_p.S79L	ZRANB1_c.236C>T_p.S79L_2	TTCGTATAGCATGGAAAAT	Hepatocellular carcinoma
ZRANB1_c.236C>T_p.S79L	ZRANB1_c.236C>T_p.S79L_3	CTTCGTATAGCATGGAAAA	Hepatocellular carcinoma
ZRANB1_c.236C>T_p.S79L	ZRANB1_c.236C>T_p.S79L_6	AATCTTCGTATAGCATGGA	Hepatocellular carcinoma
BNIP3_c.299C>T_p.S100L	BNIP3_c.299C>T_p.S100L_3	CCTCGGTTTCTATTTATAA	Non small cell carcinoma
BNIP3_c.299C>T_p.S100L	BNIP3_c.299C>T_p.S100L_4	GCCTCGGTTTCTATTTATA	Non small cell carcinoma
BNIP3_c.299C>T_p.S100L	BNIP3_c.299C>T_p.S100L_2	CTCGGTTTCTATTTATAAT	Non small cell carcinoma
BNIP3_c.299C>T_p.S100L	BNIP3_c.299C>T_p.S100L_6	CAGCCTCGGTTTCTATTTA	Non small cell carcinoma
BNIP3_c.299C>T_p.S100L	BNIP3_c.299C>T_p.S100L_5	AGCCTCGGTTTCTATTTAT	Non small cell carcinoma
KNDC1_c.1612G>A_p.A538T	KNDC1_c.1612G>A_p.A538T_3	CTGCGGTCCACAGAACGGC	BRCA_HER-positive carcinoma
KNDC1_c.1612G>A_p.A538T	KNDC1_c.1612G>A_p.A538T_4	GCTGCGGTCCACAGAACGG	BRCA_HER-positive carcinoma
KNDC1_c.1612G>A_p.A538T	KNDC1_c.1612G>A_p.A538T_2	TGCGGTCCACAGAACGGCG	BRCA_HER-positive carcinoma
KNDC1_c.1612G>A_p.A538T	KNDC1_c.1612G>A_p.A538T_5	GGCTGCGGTCCACAGAACG	BRCA_HER-positive carcinoma
KNDC1_c.1612G>A_p.A538T	KNDC1_c.1612G>A_p.A538T_6	TGGCTGCGGTCCACAGAAC	BRCA_HER-positive carcinoma
FAM107B_c.710G>A_p.R237Q	FAM107B_c.710G>A_p.R237Q_2	CTCGTTTTCTTTTTTCCAT	BRCA_Basal (triple-negative) carcinoma
FAM107B_c.710G>A_p.R237Q	FAM107B_c.710G>A_p.R237Q_3	TCTCGTTTTCTTTTTTCCA	BRCA_Basal (triple-negative) carcinoma
FAM107B_c.710G>A_p.R237Q	FAM107B_c.710G>A_p.R237Q_6	TGGTCTCGTTTTCTTTTTT	BRCA_Basal (triple-negative) carcinoma
FAM107B_c.710G>A_p.R237Q	FAM107B_c.710G>A_p.R237Q_4	GTCTCGTTTTCTTTTTTCC	BRCA_Basal (triple-negative) carcinoma
FAM107B_c.710G>A_p.R237Q	FAM107B_c.710G>A_p.R237Q_5	GGTCTCGTTTTCTTTTTTC	BRCA_Basal (triple-negative) carcinoma
ITGA8_c.2234C>T_p.A745V	ITGA8_c.2234C>T_p.A745V_2	TGCAGTTCCACGTCTTGAG	Hepatocellular carcinoma
ITGA8_c.2234C>T_p.A745V	ITGA8_c.2234C>T_p.A745V_6	GATTTGCAGTTCCACGTCT	Hepatocellular carcinoma
ITGA8_c.2234C>T_p.A745V	ITGA8_c.2234C>T_p.A745V_5	ATTTGCAGTTCCACGTCTT	Hepatocellular carcinoma
ITGA8_c.2234C>T_p.A745V	ITGA8_c.2234C>T_p.A745V_3	TTGCAGTTCCACGTCTTGA	Hepatocellular carcinoma
ITGA8_c.2234C>T_p.A745V	ITGA8_c.2234C>T_p.A745V_4	TTTGCAGTTCCACGTCTTG	Hepatocellular carcinoma
ITGA8_c.2107C>T_p.R703C	ITGA8_c.2107C>T_p.R703C_4	CGAACGCAACAACAAGGTA	BRCA_HER-positive carcinoma
ITGA8_c.2107C>T_p.R703C	ITGA8_c.2107C>T_p.R703C_3	GAACGCAACAACAAGGTAA	BRCA_HER-positive carcinoma
ITGA8_c.2107C>T_p.R703C	ITGA8_c.2107C>T_p.R703C_2	AACGCAACAACAAGGTAAT	BRCA_HER-positive carcinoma
ITGA8_c.2107C>T_p.R703C	ITGA8_c.2107C>T_p.R703C_5	TCGAACGCAACAACAAGGT	BRCA_HER-positive carcinoma
ITGA8_c.2107C>T_p.R703C	ITGA8_c.2107C>T_p.R703C_6	ATCGAACGCAACAACAAGG	BRCA_HER-positive carcinoma
CUBN_c.7871G>A_p.S2624N	CUBN_c.7871G>A_p.S2624N_2	GACTTTCTAGGTAAAAATC	Hepatocellular carcinoma
CUBN_c.7871G>A_p.S2624N	CUBN_c.7871G>A_p.S2624N_3	TGACTTTCTAGGTAAAAAT	Hepatocellular carcinoma
CUBN_c.7871G>A_p.S2624N	CUBN_c.7871G>A_p.S2624N_4	GTGACTTTCTAGGTAAAAA	Hepatocellular carcinoma
CUBN_c.7871G>A_p.S2624N	CUBN_c.7871G>A_p.S2624N_5	GGTGACTTTCTAGGTAAAA	Hepatocellular carcinoma
CUBN_c.7871G>A_p.S2624N	CUBN_c.7871G>A_p.S2624N_6	TGGTGACTTTCTAGGTAAA	Hepatocellular carcinoma
CUBN_c.4493G>A_p.G1498D	CUBN_c.4493G>A_p.G1498D_2	AGCCTCTCCCATTTATGGA	Hepatocellular carcinoma
CUBN_c.4493G>A_p.G1498D	CUBN_c.4493G>A_p.G1498D_5	TGAAGCCTCTCCCATTTAT	Hepatocellular carcinoma
CUBN_c.4493G>A_p.G1498D	CUBN_c.4493G>A_p.G1498D_6	TTGAAGCCTCTCCCATTTA	Hepatocellular carcinoma
CUBN_c.4493G>A_p.G1498D	CUBN_c.4493G>A_p.G1498D_3	AAGCCTCTCCCATTTATGG	Hepatocellular carcinoma
CUBN_c.4493G>A_p.G1498D	CUBN_c.4493G>A_p.G1498D_4	GAAGCCTCTCCCATTTATG	Hepatocellular carcinoma
ST8SIA6_c.170C>T_p.P57L	ST8SIA6_c.170C>T_p.P57L_2	CCCGGCGACCGCGGTACCG	Hepatocellular carcinoma
ST8SIA6_c.170C>T_p.P57L	ST8SIA6_c.170C>T_p.P57L_5	GAGCCCGGCGACCGCGGTA	Hepatocellular carcinoma
ST8SIA6_c.170C>T_p.P57L	ST8SIA6_c.170C>T_p.P57L_6	GGAGCCCGGCGACCGCGGT	Hepatocellular carcinoma
ST8SIA6_c.170C>T_p.P57L	ST8SIA6_c.170C>T_p.P57L_3	GCCCGGCGACCGCGGTACC	Hepatocellular carcinoma
ST8SIA6_c.170C>T_p.P57L	ST8SIA6_c.170C>T_p.P57L_4	AGCCCGGCGACCGCGGTAC	Hepatocellular carcinoma
CACNB2_c.301C>T_p.R101W	CACNB2_c.301C>T_p.R101W_4	GGAGCGGCAGGCCCAGGCA	Small cell carcinoma
CACNB2_c.301C>T_p.R101W	CACNB2_c.301C>T_p.R101W_5	CGGAGCGGCAGGCCCAGGC	Small cell carcinoma
CACNB2_c.301C>T_p.R101W	CACNB2_c.301C>T_p.R101W_2	AGCGGCAGGCCCAGGCACA	Small cell carcinoma
CACNB2_c.301C>T_p.R101W	CACNB2_c.301C>T_p.R101W_3	GAGCGGCAGGCCCAGGCAC	Small cell carcinoma
CACNB2_c.301C>T_p.R101W	CACNB2_c.301C>T_p.R101W_6	GCGGAGCGGCAGGCCCAGG	Small cell carcinoma
DNAJC1_c.1340C>T_p.P447L	DNAJC1_c.1340C>T_p.P447L_3	AGCCAGCCAGGCTGCTGGA	BRCA_HER-positive carcinoma
DNAJC1_c.1340C>T_p.P447L	DNAJC1_c.1340C>T_p.P447L_4	AAGCCAGCCAGGCTGCTGG	BRCA_HER-positive carcinoma
DNAJC1_c.1340C>T_p.P447L	DNAJC1_c.1340C>T_p.P447L_5	GAAGCCAGCCAGGCTGCTG	BRCA_HER-positive carcinoma
DNAJC1_c.1340C>T_p.P447L	DNAJC1_c.1340C>T_p.P447L_2	GCCAGCCAGGCTGCTGGAG	BRCA_HER-positive carcinoma
DNAJC1_c.1340C>T_p.P447L	DNAJC1_c.1340C>T_p.P447L_6	GGAAGCCAGCCAGGCTGCT	BRCA_HER-positive carcinoma
KIAA1217_c.1961C>T_p.A654V	KIAA1217_c.1961C>T_p.A654V_3	TGGCGGAACTCAGGCTCCA	Hepatocellular carcinoma
KIAA1217_c.1961C>T_p.A654V	KIAA1217_c.1961C>T_p.A654V_4	GTGGCGGAACTCAGGCTCC	Hepatocellular carcinoma
KIAA1217_c.1961C>T_p.A654V	KIAA1217_c.1961C>T_p.A654V_2	GGCGGAACTCAGGCTCCAG	Hepatocellular carcinoma
KIAA1217_c.1961C>T_p.A654V	KIAA1217_c.1961C>T_p.A654V_5	CGTGGCGGAACTCAGGCTC	Hepatocellular carcinoma
KIAA1217_c.1961C>T_p.A654V	KIAA1217_c.1961C>T_p.A654V_6	GCGTGGCGGAACTCAGGCT	Hepatocellular carcinoma
KIAA1217_c.3600G>A_p.M1200I	KIAA1217_c.3600G>A_p.M1200I_2	TCCATTTGGGGGCCATTTT	Hepatocellular carcinoma
KIAA1217_c.3600G>A_p.M1200I	KIAA1217_c.3600G>A_p.M1200I_3	TTCCATTTGGGGGCCATTT	Hepatocellular carcinoma
KIAA1217_c.3600G>A_p.M1200I	KIAA1217_c.3600G>A_p.M1200I_6	GAATTCCATTTGGGGGCCA	Hepatocellular carcinoma
KIAA1217_c.3600G>A_p.M1200I	KIAA1217_c.3600G>A_p.M1200I_4	ATTCCATTTGGGGGCCATT	Hepatocellular carcinoma
KIAA1217_c.3600G>A_p.M1200I	KIAA1217_c.3600G>A_p.M1200I_5	AATTCCATTTGGGGGCCAT	Hepatocellular carcinoma
ANKRD26_c.586G>A_p.E196K	ANKRD26_c.586G>A_p.E196K_3	ATTCCACCATTTGCTGCTT	Hepatocellular carcinoma
ANKRD26_c.586G>A_p.E196K	ANKRD26_c.586G>A_p.E196K_4	AATTCCACCATTTGCTGCT	Hepatocellular carcinoma
ANKRD26_c.586G>A_p.E196K	ANKRD26_c.586G>A_p.E196K_2	TTCCACCATTTGCTGCTTT	Hepatocellular carcinoma
ANKRD26_c.586G>A_p.E196K	ANKRD26_c.586G>A_p.E196K_5	AAATTCCACCATTTGCTGC	Hepatocellular carcinoma
ANKRD26_c.586G>A_p.E196K	ANKRD26_c.586G>A_p.E196K_6	AAAATTCCACCATTTGCTG	Hepatocellular carcinoma
DIP2C_c.4168G>A_p.G1390R	DIP2C_c.4168G>A_p.G1390R_3	CTCCGTAAATAGTGAAATA	Hepatocellular carcinoma
DIP2C_c.4168G>A_p.G1390R	DIP2C_c.4168G>A_p.G1390R_2	TCCGTAAATAGTGAAATAA	Hepatocellular carcinoma
DIP2C_c.4168G>A_p.G1390R	DIP2C_c.4168G>A_p.G1390R_4	TCTCCGTAAATAGTGAAAT	Hepatocellular carcinoma
DIP2C_c.4168G>A_p.G1390R	DIP2C_c.4168G>A_p.G1390R_5	GTCTCCGTAAATAGTGAAA	Hepatocellular carcinoma
DIP2C_c.4168G>A_p.G1390R	DIP2C_c.4168G>A_p.G1390R_6	CGTCTCCGTAAATAGTGAA	Hepatocellular carcinoma
MAP3K8_c.1382C>T_p.P461L	MAP3K8_c.1382C>T_p.P461L_2	ACCACCAACGCTTGAATAT	BRCA_Basal (triple-negative) carcinoma
MAP3K8_c.1382C>T_p.P461L	MAP3K8_c.1382C>T_p.P461L_5	GGGACCACCAACGCTTGAA	BRCA_Basal (triple-negative) carcinoma
MAP3K8_c.1382C>T_p.P461L	MAP3K8_c.1382C>T_p.P461L_6	GGGGACCACCAACGCTTGA	BRCA_Basal (triple-negative) carcinoma
MAP3K8_c.1382C>T_p.P461L	MAP3K8_c.1382C>T_p.P461L_3	GACCACCAACGCTTGAATA	BRCA_Basal (triple-negative) carcinoma
MAP3K8_c.1382C>T_p.P461L	MAP3K8_c.1382C>T_p.P461L_4	GGACCACCAACGCTTGAAT	BRCA_Basal (triple-negative) carcinoma
GJD4_c.269C>T_p.A90V	GJD4_c.269C>T_p.A90V_2	CGCCGTCTTCAGCGTCTAT	Non small cell carcinoma
GJD4_c.269C>T_p.A90V	GJD4_c.269C>T_p.A90V_5	CTCCGCCGTCTTCAGCGTC	Non small cell carcinoma
GJD4_c.269C>T_p.A90V	GJD4_c.269C>T_p.A90V_6	CCTCCGCCGTCTTCAGCGT	Non small cell carcinoma
GJD4_c.269C>T_p.A90V	GJD4_c.269C>T_p.A90V_3	CCGCCGTCTTCAGCGTCTA	Non small cell carcinoma
GJD4_c.269C>T_p.A90V	GJD4_c.269C>T_p.A90V_4	TCCGCCGTCTTCAGCGTCT	Non small cell carcinoma
GPRIN2_c.721G>A_p.V241M	GPRIN2_c.721G>A_p.V241M_4	CTCACCTCCCTCATGCCAC	Non small cell carcinoma
GPRIN2_c.721G>A_p.V241M	GPRIN2_c.721G>A_p.V241M_5	CCTCACCTCCCTCATGCCA	Non small cell carcinoma
GPRIN2_c.721G>A_p.V241M	GPRIN2_c.721G>A_p.V241M_2	CACCTCCCTCATGCCACAG	Non small cell carcinoma
GPRIN2_c.721G>A_p.V241M	GPRIN2_c.721G>A_p.V241M_3	TCACCTCCCTCATGCCACA	Non small cell carcinoma
GPRIN2_c.721G>A_p.V241M	GPRIN2_c.721G>A_p.V241M_6	CCCTCACCTCCCTCATGCC	Non small cell carcinoma
DRGX_c.668C>T_p.S223L	DRGX_c.668C>T_p.S223L_3	AGTCAGCCAACCTCCTGCC	BRCA_HER-positive carcinoma
DRGX_c.668C>T_p.S223L	DRGX_c.668C>T_p.S223L_4	CAGTCAGCCAACCTCCTGC	BRCA_HER-positive carcinoma
DRGX_c.668C>T_p.S223L	DRGX_c.668C>T_p.S223L_5	GCAGTCAGCCAACCTCCTG	BRCA_HER-positive carcinoma
DRGX_c.668C>T_p.S223L	DRGX_c.668C>T_p.S223L_2	GTCAGCCAACCTCCTGCCT	BRCA_HER-positive carcinoma
DRGX_c.668C>T_p.S223L	DRGX_c.668C>T_p.S223L_6	TGCAGTCAGCCAACCTCCT	BRCA_HER-positive carcinoma
DRGX_c.395C>T_p.A132V	DRGX_c.395C>T_p.A132V_3	AGGCGCTGGAGGCCCAGCA	BRCA_HER-positive carcinoma
DRGX_c.395C>T_p.A132V	DRGX_c.395C>T_p.A132V_4	GAGGCGCTGGAGGCCCAGC	BRCA_HER-positive carcinoma
DRGX_c.395C>T_p.A132V	DRGX_c.395C>T_p.A132V_2	GGCGCTGGAGGCCCAGCAG	BRCA_HER-positive carcinoma
DRGX_c.395C>T_p.A132V	DRGX_c.395C>T_p.A132V_5	GGAGGCGCTGGAGGCCCAG	BRCA_HER-positive carcinoma
DRGX_c.395C>T_p.A132V	DRGX_c.395C>T_p.A132V_6	AGGAGGCGCTGGAGGCCCA	BRCA_HER-positive carcinoma
SLC18A3_c.688C>T_p.P230S	SLC18A3_c.688C>T_p.P230S_2	CGCCCTTCGGGGGCATCCT	BRCA_HER-positive carcinoma
SLC18A3_c.688C>T_p.P230S	SLC18A3_c.688C>T_p.P230S_3	CCGCCCTTCGGGGGCATCC	BRCA_HER-positive carcinoma
SLC18A3_c.688C>T_p.P230S	SLC18A3_c.688C>T_p.P230S_6	GCCCCGCCCTTCGGGGGCA	BRCA_HER-positive carcinoma
SLC18A3_c.688C>T_p.P230S	SLC18A3_c.688C>T_p.P230S_4	CCCGCCCTTCGGGGGCATC	BRCA_HER-positive carcinoma
SLC18A3_c.688C>T_p.P230S	SLC18A3_c.688C>T_p.P230S_5	CCCCGCCCTTCGGGGGCAT	BRCA_HER-positive carcinoma
DKK1_c.674G>A_p.R225K	DKK1_c.674G>A_p.R225K_3	TTTCTCCTATGCTTGGTAC	Non small cell carcinoma
DKK1_c.674G>A_p.R225K	DKK1_c.674G>A_p.R225K_4	TTTTCTCCTATGCTTGGTA	Non small cell carcinoma
DKK1_c.674G>A_p.R225K	DKK1_c.674G>A_p.R225K_2	TTCTCCTATGCTTGGTACA	Non small cell carcinoma
DKK1_c.674G>A_p.R225K	DKK1_c.674G>A_p.R225K_5	CTTTTCTCCTATGCTTGGT	Non small cell carcinoma
DKK1_c.674G>A_p.R225K	DKK1_c.674G>A_p.R225K_6	CCTTTTCTCCTATGCTTGG	Non small cell carcinoma
ZNF365_c.388C>T_p.Q130*	ZNF365_c.388C>T_p.Q130*_3	ATTCAAGGTCATTTTTGGT	Hepatocellular carcinoma
ZNF365_c.388C>T_p.Q130*	ZNF365_c.388C>T_p.Q130*_2	TTCAAGGTCATTTTTGGTT	Hepatocellular carcinoma
ZNF365_c.388C>T_p.Q130*	ZNF365_c.388C>T_p.Q130*_4	AATTCAAGGTCATTTTTGG	Hepatocellular carcinoma
ZNF365_c.388C>T_p.Q130*	ZNF365_c.388C>T_p.Q130*_5	CAATTCAAGGTCATTTTTG	Hepatocellular carcinoma
ZNF365_c.388C>T_p.Q130*	ZNF365_c.388C>T_p.Q130*_6	TCAATTCAAGGTCATTTTT	Hepatocellular carcinoma
AIFM2_c.721C>T_p.L241F	AIFM2_c.721C>T_p.L241F_2	TTCTCTGCACCGGCATCAA	Hepatocellular carcinoma
AIFM2_c.721C>T_p.L241F	AIFM2_c.721C>T_p.L241F_5	TGATTCTCTGCACCGGCAT	Hepatocellular carcinoma
AIFM2_c.721C>T_p.L241F	AIFM2_c.721C>T_p.L241F_6	GTGATTCTCTGCACCGGCA	Hepatocellular carcinoma
AIFM2_c.721C>T_p.L241F	AIFM2_c.721C>T_p.L241F_3	ATTCTCTGCACCGGCATCA	Hepatocellular carcinoma
AIFM2_c.721C>T_p.L241F	AIFM2_c.721C>T_p.L241F_4	GATTCTCTGCACCGGCATC	Hepatocellular carcinoma
AGAP5_c.406G>A_p.E136K	AGAP5_c.406G>A_p.E136K_2	CTCAGTAGATACCTGAAGG	Non small cell carcinoma
AGAP5_c.406G>A_p.E136K	AGAP5_c.406G>A_p.E136K_5	ACGCTCAGTAGATACCTGA	Non small cell carcinoma
AGAP5_c.406G>A_p.E136K	AGAP5_c.406G>A_p.E136K_6	AACGCTCAGTAGATACCTG	Non small cell carcinoma
AGAP5_c.406G>A_p.E136K	AGAP5_c.406G>A_p.E136K_3	GCTCAGTAGATACCTGAAG	Non small cell carcinoma
AGAP5_c.406G>A_p.E136K	AGAP5_c.406G>A_p.E136K_4	CGCTCAGTAGATACCTGAA	Non small cell carcinoma
SFTPA1_c.709G>A_p.E237K	SFTPA1_c.709G>A_p.E237K_4	TGCTCTTTTCCCCGACCTG	BRCA_HER-positive carcinoma
SFTPA1_c.709G>A_p.E237K	SFTPA1_c.709G>A_p.E237K_5	CTGCTCTTTTCCCCGACCT	BRCA_HER-positive carcinoma
SFTPA1_c.709G>A_p.E237K	SFTPA1_c.709G>A_p.E237K_2	CTCTTTTCCCCGACCTGCG	BRCA_HER-positive carcinoma
SFTPA1_c.709G>A_p.E237K	SFTPA1_c.709G>A_p.E237K_3	GCTCTTTTCCCCGACCTGC	BRCA_HER-positive carcinoma
SFTPA1_c.709G>A_p.E237K	SFTPA1_c.709G>A_p.E237K_6	ACTGCTCTTTTCCCCGACC	BRCA_HER-positive carcinoma
LARP4B_c.1754C>T_p.S585L	LARP4B_c.1754C>T_p.S585L_3	CCTCGGTGCCGGCTTCTTG	BRCA_HER-positive carcinoma
LARP4B_c.1754C>T_p.S585L	LARP4B_c.1754C>T_p.S585L_4	CCCTCGGTGCCGGCTTCTT	BRCA_HER-positive carcinoma
LARP4B_c.1754C>T_p.S585L	LARP4B_c.1754C>T_p.S585L_5	GCCCTCGGTGCCGGCTTCT	BRCA_HER-positive carcinoma
LARP4B_c.1754C>T_p.S585L	LARP4B_c.1754C>T_p.S585L_2	CTCGGTGCCGGCTTCTTGT	BRCA_HER-positive carcinoma
LARP4B_c.1754C>T_p.S585L	LARP4B_c.1754C>T_p.S585L_6	AGCCCTCGGTGCCGGCTTC	BRCA_HER-positive carcinoma
C10orf99_c.209G>A_p.R70H	C10orf99_c.209G>A_p.R70H_3	AGGCGGGGCTCTGGCTCAA	Non small cell carcinoma
C10orf99_c.209G>A_p.R70H	C10orf99_c.209G>A_p.R70H_4	AAGGCGGGGCTCTGGCTCA	Non small cell carcinoma
C10orf99_c.209G>A_p.R70H	C10orf99_c.209G>A_p.R70H_2	GGCGGGGCTCTGGCTCAAG	Non small cell carcinoma
C10orf99_c.209G>A_p.R70H	C10orf99_c.209G>A_p.R70H_5	AAAGGCGGGGCTCTGGCTC	Non small cell carcinoma
C10orf99_c.209G>A_p.R70H	C10orf99_c.209G>A_p.R70H_6	CAAAGGCGGGGCTCTGGCT	Non small cell carcinoma
GRID1_c.2998G>A_p.A1000T	GRID1_c.2998G>A_p.A1000T_2	AGCCTCTGGAAGGACGCCT	BRCA_HER-positive carcinoma
GRID1_c.2998G>A_p.A1000T	GRID1_c.2998G>A_p.A1000T_3	GAGCCTCTGGAAGGACGCC	BRCA_HER-positive carcinoma
GRID1_c.2998G>A_p.A1000T	GRID1_c.2998G>A_p.A1000T_6	CCAGAGCCTCTGGAAGGAC	BRCA_HER-positive carcinoma
GRID1_c.2998G>A_p.A1000T	GRID1_c.2998G>A_p.A1000T_4	AGAGCCTCTGGAAGGACGC	BRCA_HER-positive carcinoma
GRID1_c.2998G>A_p.A1000T	GRID1_c.2998G>A_p.A1000T_5	CAGAGCCTCTGGAAGGACG	BRCA_HER-positive carcinoma
PTEN_c.49C>T_p.Q17*	PTEN_c.49C>T_p.Q17*_5	GATATCAAGAGGATGGATT	Non small cell carcinoma
PTEN_c.49C>T_p.Q17*	PTEN_c.49C>T_p.Q17*_6	AGATATCAAGAGGATGGAT	Non small cell carcinoma
PTEN_c.49C>T_p.Q17*	PTEN_c.49C>T_p.Q17*_4	ATATCAAGAGGATGGATTC	Non small cell carcinoma
PTEN_c.49C>T_p.Q17*	PTEN_c.49C>T_p.Q17*_2	ATCAAGAGGATGGATTCGA	Non small cell carcinoma
PTEN_c.49C>T_p.Q17*	PTEN_c.49C>T_p.Q17*_3	TATCAAGAGGATGGATTCG	Non small cell carcinoma
PTEN_c.286C>T_p.P96S	PTEN_c.286C>T_p.P96S_3	CCACCACAGCTAGAACTTA	Non small cell carcinoma
PTEN_c.286C>T_p.P96S	PTEN_c.286C>T_p.P96S_4	CCCACCACAGCTAGAACTT	Non small cell carcinoma
PTEN_c.286C>T_p.P96S	PTEN_c.286C>T_p.P96S_5	ACCCACCACAGCTAGAACT	Non small cell carcinoma
PTEN_c.286C>T_p.P96S	PTEN_c.286C>T_p.P96S_2	CACCACAGCTAGAACTTAT	Non small cell carcinoma
PTEN_c.286C>T_p.P96S	PTEN_c.286C>T_p.P96S_6	AACCCACCACAGCTAGAAC	Non small cell carcinoma
PTEN_c.376G>A_p.A126T	PTEN_c.376G>A_p.A126T_2	AGCTTTACAGTGAATTGCT	CRC_Adenocarcinoma
PTEN_c.376G>A_p.A126T	PTEN_c.376G>A_p.A126T_3	CAGCTTTACAGTGAATTGC	CRC_Adenocarcinoma
PTEN_c.376G>A_p.A126T	PTEN_c.376G>A_p.A126T_4	CCAGCTTTACAGTGAATTG	CRC_Adenocarcinoma
PTEN_c.376G>A_p.A126T	PTEN_c.376G>A_p.A126T_6	TTCCAGCTTTACAGTGAAT	CRC_Adenocarcinoma
PTEN_c.376G>A_p.A126T	PTEN_c.376G>A_p.A126T_5	TCCAGCTTTACAGTGAATT	CRC_Adenocarcinoma
PTEN_c.389G>A_p.R130Q	PTEN_c.389G>A_p.R130Q_3	GTTCGTCCCTTTCCAGCTT	CRC_Adenocarcinoma
PTEN_c.389G>A_p.R130Q	PTEN_c.389G>A_p.R130Q_4	AGTTCGTCCCTTTCCAGCT	CRC_Adenocarcinoma
PTEN_c.389G>A_p.R130Q	PTEN_c.389G>A_p.R130Q_2	TTCGTCCCTTTCCAGCTTT	CRC_Adenocarcinoma
PTEN_c.389G>A_p.R130Q	PTEN_c.389G>A_p.R130Q_5	CAGTTCGTCCCTTTCCAGC	CRC_Adenocarcinoma
PTEN_c.389G>A_p.R130Q	PTEN_c.389G>A_p.R130Q_6	CCAGTTCGTCCCTTTCCAG	CRC_Adenocarcinoma
PTEN_c.494G>A_p.G165E	PTEN_c.494G>A_p.G165E_2	CTCCCTGGTGGACAGAAAA	Small cell carcinoma
PTEN_c.494G>A_p.G165E	PTEN_c.494G>A_p.G165E_3	ACTCCCTGGTGGACAGAAA	Small cell carcinoma
PTEN_c.494G>A_p.G165E	PTEN_c.494G>A_p.G165E_6	GTTACTCCCTGGTGGACAG	Small cell carcinoma
PTEN_c.494G>A_p.G165E	PTEN_c.494G>A_p.G165E_4	TACTCCCTGGTGGACAGAA	Small cell carcinoma
PTEN_c.494G>A_p.G165E	PTEN_c.494G>A_p.G165E_5	TTACTCCCTGGTGGACAGA	Small cell carcinoma
PTEN_c.697C>T_p.R233*	PTEN_c.697C>T_p.R233*_2	CACGACGGGAAGACAAGTT	CRC_Adenocarcinoma, Non small cell carcinoma
PTEN_c.697C>T_p.R233*	PTEN_c.697C>T_p.R233*_5	CCACACGACGGGAAGACAA	CRC_Adenocarcinoma, Non small cell carcinoma
PTEN_c.697C>T_p.R233*	PTEN_c.697C>T_p.R233*_6	CCCACACGACGGGAAGACA	CRC_Adenocarcinoma, Non small cell carcinoma
PTEN_c.697C>T_p.R233*	PTEN_c.697C>T_p.R233*_3	ACACGACGGGAAGACAAGT	CRC_Adenocarcinoma, Non small cell carcinoma
PTEN_c.697C>T_p.R233*	PTEN_c.697C>T_p.R233*_4	CACACGACGGGAAGACAAG	CRC_Adenocarcinoma, Non small cell carcinoma
FFAR4_c.838C>T_p.R280C	FFAR4_c.838C>T_p.R280C_2	TCCGCACCCTCTTCCTCCT	Small cell carcinoma
FFAR4_c.838C>T_p.R280C	FFAR4_c.838C>T_p.R280C_5	TCTTCCGCACCCTCTTCCT	Small cell carcinoma
FFAR4_c.838C>T_p.R280C	FFAR4_c.838C>T_p.R280C_6	CTCTTCCGCACCCTCTTCC	Small cell carcinoma
FFAR4_c.838C>T_p.R280C	FFAR4_c.838C>T_p.R280C_3	TTCCGCACCCTCTTCCTCC	Small cell carcinoma
FFAR4_c.838C>T_p.R280C	FFAR4_c.838C>T_p.R280C_4	CTTCCGCACCCTCTTCCTC	Small cell carcinoma
NOC3L_c.1121C>T_p.S374L	NOC3L_c.1121C>T_p.S374L_4	ATGTCAAAATTGGTGAGTT	BRCA_HER-positive carcinoma
NOC3L_c.1121C>T_p.S374L	NOC3L_c.1121C>T_p.S374L_5	CATGTCAAAATTGGTGAGT	BRCA_HER-positive carcinoma
NOC3L_c.1121C>T_p.S374L	NOC3L_c.1121C>T_p.S374L_2	GTCAAAATTGGTGAGTTGC	BRCA_HER-positive carcinoma
NOC3L_c.1121C>T_p.S374L	NOC3L_c.1121C>T_p.S374L_3	TGTCAAAATTGGTGAGTTG	BRCA_HER-positive carcinoma
NOC3L_c.1121C>T_p.S374L	NOC3L_c.1121C>T_p.S374L_6	ACATGTCAAAATTGGTGAG	BRCA_HER-positive carcinoma
ALDH18A1_c.553G>A_p.A185T	ALDH18A1_c.553G>A_p.A185T_4	TGGGCAGCACAGATGCTGT	Hepatocellular carcinoma
ALDH18A1_c.553G>A_p.A185T	ALDH18A1_c.553G>A_p.A185T_5	CTGGGCAGCACAGATGCTG	Hepatocellular carcinoma
ALDH18A1_c.553G>A_p.A185T	ALDH18A1_c.553G>A_p.A185T_6	CCTGGGCAGCACAGATGCT	Hepatocellular carcinoma
ALDH18A1_c.553G>A_p.A185T	ALDH18A1_c.553G>A_p.A185T_2	GGCAGCACAGATGCTGTAC	Hepatocellular carcinoma
ALDH18A1_c.553G>A_p.A185T	ALDH18A1_c.553G>A_p.A185T_3	GGGCAGCACAGATGCTGTA	Hepatocellular carcinoma
CCNJ_c.62G>A_p.R21H	CCNJ_c.62G>A_p.R21H_5	TGTAGCGAAGCGCTTGGTG	Hepatocellular carcinoma
CCNJ_c.62G>A_p.R21H	CCNJ_c.62G>A_p.R21H_2	AGCGAAGCGCTTGGTGAAT	Hepatocellular carcinoma
CCNJ_c.62G>A_p.R21H	CCNJ_c.62G>A_p.R21H_3	TAGCGAAGCGCTTGGTGAA	Hepatocellular carcinoma
CCNJ_c.62G>A_p.R21H	CCNJ_c.62G>A_p.R21H_4	GTAGCGAAGCGCTTGGTGA	Hepatocellular carcinoma
CCNJ_c.62G>A_p.R21H	CCNJ_c.62G>A_p.R21H_6	TTGTAGCGAAGCGCTTGGT	Hepatocellular carcinoma
LOXL4_c.1960C>T_p.R654W	LOXL4_c.1960C>T_p.R654W_4	GCAGCGGCGCTACGCATGT	BRCA_HER-positive carcinoma
LOXL4_c.1960C>T_p.R654W	LOXL4_c.1960C>T_p.R654W_2	AGCGGCGCTACGCATGTGC	BRCA_HER-positive carcinoma
LOXL4_c.1960C>T_p.R654W	LOXL4_c.1960C>T_p.R654W_3	CAGCGGCGCTACGCATGTG	BRCA_HER-positive carcinoma
LOXL4_c.1960C>T_p.R654W	LOXL4_c.1960C>T_p.R654W_6	CTGCAGCGGCGCTACGCAT	BRCA_HER-positive carcinoma
LOXL4_c.1960C>T_p.R654W	LOXL4_c.1960C>T_p.R654W_5	TGCAGCGGCGCTACGCATG	BRCA_HER-positive carcinoma
NKX2-3_c.659C>T_p.P220L	NKX2-3_c.659C>T_p.P220L_3	CCCCGCCGCCGCCGCGCCG	BRCA_HER-positive carcinoma
NKX2-3_c.659C>T_p.P220L	NKX2-3_c.659C>T_p.P220L_4	CCCCCGCCGCCGCCGCGCC	BRCA_HER-positive carcinoma
NKX2-3_c.659C>T_p.P220L	NKX2-3_c.659C>T_p.P220L_2	CCCGCCGCCGCCGCGCCGC	BRCA_HER-positive carcinoma
NKX2-3_c.659C>T_p.P220L	NKX2-3_c.659C>T_p.P220L_5	GCCCCCGCCGCCGCCGCGC	BRCA_HER-positive carcinoma
NKX2-3_c.659C>T_p.P220L	NKX2-3_c.659C>T_p.P220L_6	CGCCCCCGCCGCCGCCGCG	BRCA_HER-positive carcinoma
DYNC2H1_c.11600G>A_p.R3867Q	DYNC2H1_c.11600G>A_p.R3867Q_2	CTCGATGTGTATTATCTTT	BRCA_Basal (triple-negative) carcinoma
DYNC2H1_c.11600G>A_p.R3867Q	DYNC2H1_c.11600G>A_p.R3867Q_3	GCTCGATGTGTATTATCTT	BRCA_Basal (triple-negative) carcinoma
DYNC2H1_c.11600G>A_p.R3867Q	DYNC2H1_c.11600G>A_p.R3867Q_6	TGAGCTCGATGTGTATTAT	BRCA_Basal (triple-negative) carcinoma
DYNC2H1_c.11600G>A_p.R3867Q	DYNC2H1_c.11600G>A_p.R3867Q_4	AGCTCGATGTGTATTATCT	BRCA_Basal (triple-negative) carcinoma
DYNC2H1_c.11600G>A_p.R3867Q	DYNC2H1_c.11600G>A_p.R3867Q_5	GAGCTCGATGTGTATTATC	BRCA_Basal (triple-negative) carcinoma
EIF4G2_c.1514G>A_p.R505H	EIF4G2_c.1514G>A_p.R505H_2	TGCGTGGTGGTTGTGCACT	BRCA_HER-positive carcinoma
EIF4G2_c.1514G>A_p.R505H	EIF4G2_c.1514G>A_p.R505H_5	GAGTGCGTGGTGGTTGTGC	BRCA_HER-positive carcinoma
EIF4G2_c.1514G>A_p.R505H	EIF4G2_c.1514G>A_p.R505H_6	TGAGTGCGTGGTGGTTGTG	BRCA_HER-positive carcinoma
EIF4G2_c.1514G>A_p.R505H	EIF4G2_c.1514G>A_p.R505H_3	GTGCGTGGTGGTTGTGCAC	BRCA_HER-positive carcinoma
EIF4G2_c.1514G>A_p.R505H	EIF4G2_c.1514G>A_p.R505H_4	AGTGCGTGGTGGTTGTGCA	BRCA_HER-positive carcinoma
NPAT_c.3137C>T_p.P1046L	NPAT_c.3137C>T_p.P1046L_2	TCCCTTCCCAGAAGAGAGT	Non small cell carcinoma
NPAT_c.3137C>T_p.P1046L	NPAT_c.3137C>T_p.P1046L_5	AGTTCCCTTCCCAGAAGAG	Non small cell carcinoma
NPAT_c.3137C>T_p.P1046L	NPAT_c.3137C>T_p.P1046L_6	CAGTTCCCTTCCCAGAAGA	Non small cell carcinoma
NPAT_c.3137C>T_p.P1046L	NPAT_c.3137C>T_p.P1046L_3	TTCCCTTCCCAGAAGAGAG	Non small cell carcinoma
NPAT_c.3137C>T_p.P1046L	NPAT_c.3137C>T_p.P1046L_4	GTTCCCTTCCCAGAAGAGA	Non small cell carcinoma
ATM_c.1009C>T_p.R337C	ATM_c.1009C>T_p.R337C_4	ATTTCGTAATATTGCCGTC	CRC_Adenocarcinoma, Non small cell carcinoma
ATM_c.1009C>T_p.R337C	ATM_c.1009C>T_p.R337C_5	GATTTCGTAATATTGCCGT	CRC_Adenocarcinoma, Non small cell carcinoma
ATM_c.1009C>T_p.R337C	ATM_c.1009C>T_p.R337C_2	TTCGTAATATTGCCGTCAA	CRC_Adenocarcinoma, Non small cell carcinoma
ATM_c.1009C>T_p.R337C	ATM_c.1009C>T_p.R337C_3	TTTCGTAATATTGCCGTCA	CRC_Adenocarcinoma, Non small cell carcinoma
ATM_c.1009C>T_p.R337C	ATM_c.1009C>T_p.R337C_6	GGATTTCGTAATATTGCCG	CRC_Adenocarcinoma, Non small cell carcinoma
ATM_c.6280G>A_p.E2094K	ATM_c.6280G>A_p.E2094K_4	AGTTCAGGACACCAGTCTT	BRCA_Basal (triple-negative) carcinoma
ATM_c.6280G>A_p.E2094K	ATM_c.6280G>A_p.E2094K_5	TAGTTCAGGACACCAGTCT	BRCA_Basal (triple-negative) carcinoma
ATM_c.6280G>A_p.E2094K	ATM_c.6280G>A_p.E2094K_6	CTAGTTCAGGACACCAGTC	BRCA_Basal (triple-negative) carcinoma
ATM_c.6280G>A_p.E2094K	ATM_c.6280G>A_p.E2094K_2	TTCAGGACACCAGTCTTTA	BRCA_Basal (triple-negative) carcinoma
ATM_c.6280G>A_p.E2094K	ATM_c.6280G>A_p.E2094K_3	GTTCAGGACACCAGTCTTT	BRCA_Basal (triple-negative) carcinoma
ATM_c.6289G>A_p.E2097K	ATM_c.6289G>A_p.E2097K_5	AAGTTCTTCTAGTTCAGGA	BRCA_Basal (triple-negative) carcinoma
ATM_c.6289G>A_p.E2097K	ATM_c.6289G>A_p.E2097K_2	TTCTTCTAGTTCAGGACAC	BRCA_Basal (triple-negative) carcinoma
ATM_c.6289G>A_p.E2097K	ATM_c.6289G>A_p.E2097K_3	GTTCTTCTAGTTCAGGACA	BRCA_Basal (triple-negative) carcinoma
ATM_c.6289G>A_p.E2097K	ATM_c.6289G>A_p.E2097K_4	AGTTCTTCTAGTTCAGGAC	BRCA_Basal (triple-negative) carcinoma
ATM_c.6289G>A_p.E2097K	ATM_c.6289G>A_p.E2097K_6	GAAGTTCTTCTAGTTCAGG	BRCA_Basal (triple-negative) carcinoma
ATM_c.8848G>A_p.E2950K	ATM_c.8848G>A_p.E2950K_4	ACCTCTACAATGGTTAACA	Small cell carcinoma
ATM_c.8848G>A_p.E2950K	ATM_c.8848G>A_p.E2950K_2	CTCTACAATGGTTAACAGA	Small cell carcinoma
ATM_c.8848G>A_p.E2950K	ATM_c.8848G>A_p.E2950K_3	CCTCTACAATGGTTAACAG	Small cell carcinoma
ATM_c.8848G>A_p.E2950K	ATM_c.8848G>A_p.E2950K_6	TTACCTCTACAATGGTTAA	Small cell carcinoma
ATM_c.8848G>A_p.E2950K	ATM_c.8848G>A_p.E2950K_5	TACCTCTACAATGGTTAAC	Small cell carcinoma
C11orf65_c.190G>A_p.A64T	C11orf65_c.190G>A_p.A64T_3	CAGCATCTAGAAGCTCTGC	Non small cell carcinoma
C11orf65_c.190G>A_p.A64T	C11orf65_c.190G>A_p.A64T_4	GCAGCATCTAGAAGCTCTG	Non small cell carcinoma
C11orf65_c.190G>A_p.A64T	C11orf65_c.190G>A_p.A64T_2	AGCATCTAGAAGCTCTGCC	Non small cell carcinoma
C11orf65_c.190G>A_p.A64T	C11orf65_c.190G>A_p.A64T_5	AGCAGCATCTAGAAGCTCT	Non small cell carcinoma
C11orf65_c.190G>A_p.A64T	C11orf65_c.190G>A_p.A64T_6	CAGCAGCATCTAGAAGCTC	Non small cell carcinoma
C11orf88_c.289G>A_p.E97K	C11orf88_c.289G>A_p.E97K_2	TTCGGCAAAGATGTCTCTA	Hepatocellular carcinoma
C11orf88_c.289G>A_p.E97K	C11orf88_c.289G>A_p.E97K_3	CTTCGGCAAAGATGTCTCT	Hepatocellular carcinoma
C11orf88_c.289G>A_p.E97K	C11orf88_c.289G>A_p.E97K_6	GGGCTTCGGCAAAGATGTC	Hepatocellular carcinoma
C11orf88_c.289G>A_p.E97K	C11orf88_c.289G>A_p.E97K_4	GCTTCGGCAAAGATGTCTC	Hepatocellular carcinoma
C11orf88_c.289G>A_p.E97K	C11orf88_c.289G>A_p.E97K_5	GGCTTCGGCAAAGATGTCT	Hepatocellular carcinoma
HSPB2_c.497C>T_p.P166L	HSPB2_c.497C>T_p.P166L_2	CCCTGCGCCTCCTGATCCA	BRCA_HER-positive carcinoma
HSPB2_c.497C>T_p.P166L	HSPB2_c.497C>T_p.P166L_5	GCTCCCTGCGCCTCCTGAT	BRCA_HER-positive carcinoma
HSPB2_c.497C>T_p.P166L	HSPB2_c.497C>T_p.P166L_6	TGCTCCCTGCGCCTCCTGA	BRCA_HER-positive carcinoma
HSPB2_c.497C>T_p.P166L	HSPB2_c.497C>T_p.P166L_3	TCCCTGCGCCTCCTGATCC	BRCA_HER-positive carcinoma
HSPB2_c.497C>T_p.P166L	HSPB2_c.497C>T_p.P166L_4	CTCCCTGCGCCTCCTGATC	BRCA_HER-positive carcinoma
ANKK1_c.2290G>A_p.E764K	ANKK1_c.2290G>A_p.E764K_2	TTCCATCTCGGCTCCTGGC	Non small cell carcinoma
ANKK1_c.2290G>A_p.E764K	ANKK1_c.2290G>A_p.E764K_5	AATTTCCATCTCGGCTCCT	Non small cell carcinoma
ANKK1_c.2290G>A_p.E764K	ANKK1_c.2290G>A_p.E764K_6	AAATTTCCATCTCGGCTCC	Non small cell carcinoma
ANKK1_c.2290G>A_p.E764K	ANKK1_c.2290G>A_p.E764K_3	TTTCCATCTCGGCTCCTGG	Non small cell carcinoma
ANKK1_c.2290G>A_p.E764K	ANKK1_c.2290G>A_p.E764K_4	ATTTCCATCTCGGCTCCTG	Non small cell carcinoma
APOC3_c.10C>T_p.R4W	APOC3_c.10C>T_p.R4W_4	GCCCCGGGTACTCCTTGTT	Hepatocellular carcinoma
APOC3_c.10C>T_p.R4W	APOC3_c.10C>T_p.R4W_5	AGCCCCGGGTACTCCTTGT	Hepatocellular carcinoma
APOC3_c.10C>T_p.R4W	APOC3_c.10C>T_p.R4W_2	CCCGGGTACTCCTTGTTGT	Hepatocellular carcinoma
APOC3_c.10C>T_p.R4W	APOC3_c.10C>T_p.R4W_3	CCCCGGGTACTCCTTGTTG	Hepatocellular carcinoma
APOC3_c.10C>T_p.R4W	APOC3_c.10C>T_p.R4W_6	CAGCCCCGGGTACTCCTTG	Hepatocellular carcinoma
SIK3_c.2362C>T_p.P788S	SIK3_c.2362C>T_p.P788S_5	CCTCTCCTCCCAACGTGGC	Non small cell carcinoma
SIK3_c.2362C>T_p.P788S	SIK3_c.2362C>T_p.P788S_6	TCCTCTCCTCCCAACGTGG	Non small cell carcinoma
SIK3_c.2362C>T_p.P788S	SIK3_c.2362C>T_p.P788S_4	CTCTCCTCCCAACGTGGCA	Non small cell carcinoma
SIK3_c.2362C>T_p.P788S	SIK3_c.2362C>T_p.P788S_2	CTCCTCCCAACGTGGCACT	Non small cell carcinoma
SIK3_c.2362C>T_p.P788S	SIK3_c.2362C>T_p.P788S_3	TCTCCTCCCAACGTGGCAC	Non small cell carcinoma
KMT2A_c.6124G>A_p.D2042N	KMT2A_c.6124G>A_p.D2042N_2	GTCGGAGAGATCATTTAGA	Non small cell carcinoma
KMT2A_c.6124G>A_p.D2042N	KMT2A_c.6124G>A_p.D2042N_3	AGTCGGAGAGATCATTTAG	Non small cell carcinoma
KMT2A_c.6124G>A_p.D2042N	KMT2A_c.6124G>A_p.D2042N_4	CAGTCGGAGAGATCATTTA	Non small cell carcinoma
KMT2A_c.6124G>A_p.D2042N	KMT2A_c.6124G>A_p.D2042N_5	ACAGTCGGAGAGATCATTT	Non small cell carcinoma
KMT2A_c.6124G>A_p.D2042N	KMT2A_c.6124G>A_p.D2042N_6	CACAGTCGGAGAGATCATT	Non small cell carcinoma
BCL9L_c.1172G>A_p.R391H	BCL9L_c.1172G>A_p.R391H_2	TGCGCTGCCCATTTCCAGG	Small cell carcinoma
BCL9L_c.1172G>A_p.R391H	BCL9L_c.1172G>A_p.R391H_3	CTGCGCTGCCCATTTCCAG	Small cell carcinoma
BCL9L_c.1172G>A_p.R391H	BCL9L_c.1172G>A_p.R391H_4	GCTGCGCTGCCCATTTCCA	Small cell carcinoma
BCL9L_c.1172G>A_p.R391H	BCL9L_c.1172G>A_p.R391H_5	GGCTGCGCTGCCCATTTCC	Small cell carcinoma
BCL9L_c.1172G>A_p.R391H	BCL9L_c.1172G>A_p.R391H_6	AGGCTGCGCTGCCCATTTC	Small cell carcinoma
CBL_c.1171G>A_p.V391I	CBL_c.1171G>A_p.V391I_3	TTACATCCTTATCATTTTC	Non small cell carcinoma
CBL_c.1171G>A_p.V391I	CBL_c.1171G>A_p.V391I_4	TTTACATCCTTATCATTTT	Non small cell carcinoma
CBL_c.1171G>A_p.V391I	CBL_c.1171G>A_p.V391I_5	CTTTACATCCTTATCATTT	Non small cell carcinoma
CBL_c.1171G>A_p.V391I	CBL_c.1171G>A_p.V391I_2	TACATCCTTATCATTTTCA	Non small cell carcinoma
CBL_c.1171G>A_p.V391I	CBL_c.1171G>A_p.V391I_6	TCTTTACATCCTTATCATT	Non small cell carcinoma
TECTA_c.3043G>A_p.E1015K	TECTA_c.3043G>A_p.E1015K_3	CCTCAGAGCAGCTATCCAC	BRCA_HER-positive carcinoma
TECTA_c.3043G>A_p.E1015K	TECTA_c.3043G>A_p.E1015K_4	CCCTCAGAGCAGCTATCCA	BRCA_HER-positive carcinoma
TECTA_c.3043G>A_p.E1015K	TECTA_c.3043G>A_p.E1015K_2	CTCAGAGCAGCTATCCACG	BRCA_HER-positive carcinoma
TECTA_c.3043G>A_p.E1015K	TECTA_c.3043G>A_p.E1015K_5	TCCCTCAGAGCAGCTATCC	BRCA_HER-positive carcinoma
TECTA_c.3043G>A_p.E1015K	TECTA_c.3043G>A_p.E1015K_6	ATCCCTCAGAGCAGCTATC	BRCA_HER-positive carcinoma
MUC5B_c.3088G>A_p.D1030N	MUC5B_c.3088G>A_p.D1030N_2	GTCGAAGTTCCCGCACAGG	BRCA_HER-positive carcinoma
MUC5B_c.3088G>A_p.D1030N	MUC5B_c.3088G>A_p.D1030N_3	CGTCGAAGTTCCCGCACAG	BRCA_HER-positive carcinoma
MUC5B_c.3088G>A_p.D1030N	MUC5B_c.3088G>A_p.D1030N_6	TGTCGTCGAAGTTCCCGCA	BRCA_HER-positive carcinoma
MUC5B_c.3088G>A_p.D1030N	MUC5B_c.3088G>A_p.D1030N_4	TCGTCGAAGTTCCCGCACA	BRCA_HER-positive carcinoma
MUC5B_c.3088G>A_p.D1030N	MUC5B_c.3088G>A_p.D1030N_5	GTCGTCGAAGTTCCCGCAC	BRCA_HER-positive carcinoma
OR10G9_c.80G>A_p.G27E	OR10G9_c.80G>A_p.G27E_2	TTCCAAAGAGTGGGGCGTC	BRCA_HER-positive carcinoma
OR10G9_c.80G>A_p.G27E	OR10G9_c.80G>A_p.G27E_3	ATTCCAAAGAGTGGGGCGT	BRCA_HER-positive carcinoma
OR10G9_c.80G>A_p.G27E	OR10G9_c.80G>A_p.G27E_6	AAGATTCCAAAGAGTGGGG	BRCA_HER-positive carcinoma
OR10G9_c.80G>A_p.G27E	OR10G9_c.80G>A_p.G27E_4	GATTCCAAAGAGTGGGGCG	BRCA_HER-positive carcinoma
OR10G9_c.80G>A_p.G27E	OR10G9_c.80G>A_p.G27E_5	AGATTCCAAAGAGTGGGGC	BRCA_HER-positive carcinoma
VWA5A_c.1080G>A_p.M360I	VWA5A_c.1080G>A_p.M360I_2	TGCATAAGCTTCACTCTCC	BRCA_HER-positive carcinoma
VWA5A_c.1080G>A_p.M360I	VWA5A_c.1080G>A_p.M360I_5	GCCTGCATAAGCTTCACTC	BRCA_HER-positive carcinoma
VWA5A_c.1080G>A_p.M360I	VWA5A_c.1080G>A_p.M360I_6	GGCCTGCATAAGCTTCACT	BRCA_HER-positive carcinoma
VWA5A_c.1080G>A_p.M360I	VWA5A_c.1080G>A_p.M360I_3	CTGCATAAGCTTCACTCTC	BRCA_HER-positive carcinoma
VWA5A_c.1080G>A_p.M360I	VWA5A_c.1080G>A_p.M360I_4	CCTGCATAAGCTTCACTCT	BRCA_HER-positive carcinoma
VWA5A_c.1186G>A_p.E396K	VWA5A_c.1186G>A_p.E396K_5	AACTTCTCCATCTGTAAAG	BRCA_HER-positive carcinoma
VWA5A_c.1186G>A_p.E396K	VWA5A_c.1186G>A_p.E396K_6	TAACTTCTCCATCTGTAAA	BRCA_HER-positive carcinoma
VWA5A_c.1186G>A_p.E396K	VWA5A_c.1186G>A_p.E396K_2	TTCTCCATCTGTAAAGACA	BRCA_HER-positive carcinoma
VWA5A_c.1186G>A_p.E396K	VWA5A_c.1186G>A_p.E396K_3	CTTCTCCATCTGTAAAGAC	BRCA_HER-positive carcinoma
VWA5A_c.1186G>A_p.E396K	VWA5A_c.1186G>A_p.E396K_4	ACTTCTCCATCTGTAAAGA	BRCA_HER-positive carcinoma
ROBO4_c.1052C>T_p.P351L	ROBO4_c.1052C>T_p.P351L_2	ACCTCAGGAAGTGACTCTA	BRCA_HER-positive carcinoma
ROBO4_c.1052C>T_p.P351L	ROBO4_c.1052C>T_p.P351L_6	CCCCACCTCAGGAAGTGAC	BRCA_HER-positive carcinoma
ROBO4_c.1052C>T_p.P351L	ROBO4_c.1052C>T_p.P351L_3	CACCTCAGGAAGTGACTCT	BRCA_HER-positive carcinoma
ROBO4_c.1052C>T_p.P351L	ROBO4_c.1052C>T_p.P351L_4	CCACCTCAGGAAGTGACTC	BRCA_HER-positive carcinoma
ROBO4_c.1052C>T_p.P351L	ROBO4_c.1052C>T_p.P351L_5	CCCACCTCAGGAAGTGACT	BRCA_HER-positive carcinoma
HEPACAM_c.1079G>A_p.R360H	HEPACAM_c.1079G>A_p.R360H_5	GGTAGCGGCGGGCAGAGCG	BRCA_HER-positive carcinoma
HEPACAM_c.1079G>A_p.R360H	HEPACAM_c.1079G>A_p.R360H_2	AGCGGCGGGCAGAGCGGAT	BRCA_HER-positive carcinoma
HEPACAM_c.1079G>A_p.R360H	HEPACAM_c.1079G>A_p.R360H_3	TAGCGGCGGGCAGAGCGGA	BRCA_HER-positive carcinoma
HEPACAM_c.1079G>A_p.R360H	HEPACAM_c.1079G>A_p.R360H_4	GTAGCGGCGGGCAGAGCGG	BRCA_HER-positive carcinoma
HEPACAM_c.1079G>A_p.R360H	HEPACAM_c.1079G>A_p.R360H_6	GGGTAGCGGCGGGCAGAGC	BRCA_HER-positive carcinoma
CDON_c.1778C>T_p.T593M	CDON_c.1778C>T_p.T593M_3	ACACGTACAACCTGGTGTG	Hepatocellular carcinoma
CDON_c.1778C>T_p.T593M	CDON_c.1778C>T_p.T593M_4	GACACGTACAACCTGGTGT	Hepatocellular carcinoma
CDON_c.1778C>T_p.T593M	CDON_c.1778C>T_p.T593M_5	AGACACGTACAACCTGGTG	Hepatocellular carcinoma
CDON_c.1778C>T_p.T593M	CDON_c.1778C>T_p.T593M_2	CACGTACAACCTGGTGTGG	Hepatocellular carcinoma
CDON_c.1778C>T_p.T593M	CDON_c.1778C>T_p.T593M_6	CAGACACGTACAACCTGGT	Hepatocellular carcinoma
SRPRA_c.1751G>A_p.G584D	SRPRA_c.1751G>A_p.G584D_3	ATGCCATCAATGAGCCGAG	BRCA_HER-positive carcinoma
SRPRA_c.1751G>A_p.G584D	SRPRA_c.1751G>A_p.G584D_4	AATGCCATCAATGAGCCGA	BRCA_HER-positive carcinoma
SRPRA_c.1751G>A_p.G584D	SRPRA_c.1751G>A_p.G584D_2	TGCCATCAATGAGCCGAGG	BRCA_HER-positive carcinoma
SRPRA_c.1751G>A_p.G584D	SRPRA_c.1751G>A_p.G584D_5	CAATGCCATCAATGAGCCG	BRCA_HER-positive carcinoma
SRPRA_c.1751G>A_p.G584D	SRPRA_c.1751G>A_p.G584D_6	ACAATGCCATCAATGAGCC	BRCA_HER-positive carcinoma
SNX19_c.592C>T_p.P198S	SNX19_c.592C>T_p.P198S_2	CCCCACATCCTGCTGTGCA	Non small cell carcinoma
SNX19_c.592C>T_p.P198S	SNX19_c.592C>T_p.P198S_3	GCCCCACATCCTGCTGTGC	Non small cell carcinoma
SNX19_c.592C>T_p.P198S	SNX19_c.592C>T_p.P198S_6	ACTGCCCCACATCCTGCTG	Non small cell carcinoma
SNX19_c.592C>T_p.P198S	SNX19_c.592C>T_p.P198S_4	TGCCCCACATCCTGCTGTG	Non small cell carcinoma
SNX19_c.592C>T_p.P198S	SNX19_c.592C>T_p.P198S_5	CTGCCCCACATCCTGCTGT	Non small cell carcinoma
ABCC8_c.1919C>T_p.A640V	ABCC8_c.1919C>T_p.A640V_2	GGCGGTGGTGAGTGCCCGG	BRCA_HER-positive carcinoma
ABCC8_c.1919C>T_p.A640V	ABCC8_c.1919C>T_p.A640V_3	AGGCGGTGGTGAGTGCCCG	BRCA_HER-positive carcinoma
ABCC8_c.1919C>T_p.A640V	ABCC8_c.1919C>T_p.A640V_6	ACCAGGCGGTGGTGAGTGC	BRCA_HER-positive carcinoma
ABCC8_c.1919C>T_p.A640V	ABCC8_c.1919C>T_p.A640V_4	CAGGCGGTGGTGAGTGCCC	BRCA_HER-positive carcinoma
ABCC8_c.1919C>T_p.A640V	ABCC8_c.1919C>T_p.A640V_5	CCAGGCGGTGGTGAGTGCC	BRCA_HER-positive carcinoma
SPTY2D1_c.683C>T_p.S228F	SPTY2D1_c.683C>T_p.S228F_2	GTCCAAAAAGGCACCCTCT	BRCA_HER-positive carcinoma
SPTY2D1_c.683C>T_p.S228F	SPTY2D1_c.683C>T_p.S228F_5	TGTGTCCAAAAAGGCACCC	BRCA_HER-positive carcinoma
SPTY2D1_c.683C>T_p.S228F	SPTY2D1_c.683C>T_p.S228F_6	CTGTGTCCAAAAAGGCACC	BRCA_HER-positive carcinoma
SPTY2D1_c.683C>T_p.S228F	SPTY2D1_c.683C>T_p.S228F_3	TGTCCAAAAAGGCACCCTC	BRCA_HER-positive carcinoma
SPTY2D1_c.683C>T_p.S228F	SPTY2D1_c.683C>T_p.S228F_4	GTGTCCAAAAAGGCACCCT	BRCA_HER-positive carcinoma
PRR33_c.1360C>T_p.P454S	PRR33_c.1360C>T_p.P454S_5	CCCCTCCCACAGTCCGCTC	Small cell carcinoma
PRR33_c.1360C>T_p.P454S	PRR33_c.1360C>T_p.P454S_6	CCCCCTCCCACAGTCCGCT	Small cell carcinoma
PRR33_c.1360C>T_p.P454S	PRR33_c.1360C>T_p.P454S_2	CTCCCACAGTCCGCTCCAT	Small cell carcinoma
PRR33_c.1360C>T_p.P454S	PRR33_c.1360C>T_p.P454S_3	CCTCCCACAGTCCGCTCCA	Small cell carcinoma
PRR33_c.1360C>T_p.P454S	PRR33_c.1360C>T_p.P454S_4	CCCTCCCACAGTCCGCTCC	Small cell carcinoma
CSRP3_c.365G>A_p.R122Q	CSRP3_c.365G>A_p.R122Q_2	ATCGAGGGCACTTCTCGGA	Hepatocellular carcinoma
CSRP3_c.365G>A_p.R122Q	CSRP3_c.365G>A_p.R122Q_6	CCACATCGAGGGCACTTCT	Hepatocellular carcinoma
CSRP3_c.365G>A_p.R122Q	CSRP3_c.365G>A_p.R122Q_3	CATCGAGGGCACTTCTCGG	Hepatocellular carcinoma
CSRP3_c.365G>A_p.R122Q	CSRP3_c.365G>A_p.R122Q_4	ACATCGAGGGCACTTCTCG	Hepatocellular carcinoma
CSRP3_c.365G>A_p.R122Q	CSRP3_c.365G>A_p.R122Q_5	CACATCGAGGGCACTTCTC	Hepatocellular carcinoma
NELL1_c.1018C>T_p.L340F	NELL1_c.1018C>T_p.L340F_5	CCCCTCTCAATTGCTCCCC	BRCA_HER-positive carcinoma
NELL1_c.1018C>T_p.L340F	NELL1_c.1018C>T_p.L340F_2	CTCTCAATTGCTCCCCAGA	BRCA_HER-positive carcinoma
NELL1_c.1018C>T_p.L340F	NELL1_c.1018C>T_p.L340F_3	CCTCTCAATTGCTCCCCAG	BRCA_HER-positive carcinoma
NELL1_c.1018C>T_p.L340F	NELL1_c.1018C>T_p.L340F_4	CCCTCTCAATTGCTCCCCA	BRCA_HER-positive carcinoma
NELL1_c.1018C>T_p.L340F	NELL1_c.1018C>T_p.L340F_6	CCCCCTCTCAATTGCTCCC	BRCA_HER-positive carcinoma
ANO5_c.1922G>A_p.R641H	ANO5_c.1922G>A_p.R641H_3	CGGCGTCTCCACCAATTCA	BRCA_HER-positive carcinoma
ANO5_c.1922G>A_p.R641H	ANO5_c.1922G>A_p.R641H_4	TCGGCGTCTCCACCAATTC	BRCA_HER-positive carcinoma
ANO5_c.1922G>A_p.R641H	ANO5_c.1922G>A_p.R641H_5	TTCGGCGTCTCCACCAATT	BRCA_HER-positive carcinoma
ANO5_c.1922G>A_p.R641H	ANO5_c.1922G>A_p.R641H_2	GGCGTCTCCACCAATTCAA	BRCA_HER-positive carcinoma
ANO5_c.1922G>A_p.R641H	ANO5_c.1922G>A_p.R641H_6	TTTCGGCGTCTCCACCAAT	BRCA_HER-positive carcinoma
LUZP2_c.112C>T_p.R38*	LUZP2_c.112C>T_p.R38*_3	GAGCGAAGCACCATTCTTC	Small cell carcinoma
LUZP2_c.112C>T_p.R38*	LUZP2_c.112C>T_p.R38*_4	GGAGCGAAGCACCATTCTT	Small cell carcinoma
LUZP2_c.112C>T_p.R38*	LUZP2_c.112C>T_p.R38*_2	AGCGAAGCACCATTCTTCG	Small cell carcinoma
LUZP2_c.112C>T_p.R38*	LUZP2_c.112C>T_p.R38*_5	AGGAGCGAAGCACCATTCT	Small cell carcinoma
LUZP2_c.112C>T_p.R38*	LUZP2_c.112C>T_p.R38*_6	AAGGAGCGAAGCACCATTC	Small cell carcinoma
KIF18A_c.1546G>A_p.E516K	KIF18A_c.1546G>A_p.E516K_2	TTCGACACGATGGAGCCAA	Small cell carcinoma
KIF18A_c.1546G>A_p.E516K	KIF18A_c.1546G>A_p.E516K_3	TTTCGACACGATGGAGCCA	Small cell carcinoma
KIF18A_c.1546G>A_p.E516K	KIF18A_c.1546G>A_p.E516K_6	CTTTTTCGACACGATGGAG	Small cell carcinoma
KIF18A_c.1546G>A_p.E516K	KIF18A_c.1546G>A_p.E516K_4	TTTTCGACACGATGGAGCC	Small cell carcinoma
KIF18A_c.1546G>A_p.E516K	KIF18A_c.1546G>A_p.E516K_5	TTTTTCGACACGATGGAGC	Small cell carcinoma
KCNA4_c.1765C>T_p.L589F	KCNA4_c.1765C>T_p.L589F_2	ACCTCCCCTCTAATTTGCT	Hepatocellular carcinoma
KCNA4_c.1765C>T_p.L589F	KCNA4_c.1765C>T_p.L589F_3	TACCTCCCCTCTAATTTGC	Hepatocellular carcinoma
KCNA4_c.1765C>T_p.L589F	KCNA4_c.1765C>T_p.L589F_6	CCATACCTCCCCTCTAATT	Hepatocellular carcinoma
KCNA4_c.1765C>T_p.L589F	KCNA4_c.1765C>T_p.L589F_4	ATACCTCCCCTCTAATTTG	Hepatocellular carcinoma
KCNA4_c.1765C>T_p.L589F	KCNA4_c.1765C>T_p.L589F_5	CATACCTCCCCTCTAATTT	Hepatocellular carcinoma
CCDC73_c.812C>T_p.T271I	CCDC73_c.812C>T_p.T271I_2	TACCCATATTCAAGAAGAA	Hepatocellular carcinoma
CCDC73_c.812C>T_p.T271I	CCDC73_c.812C>T_p.T271I_5	GATTACCCATATTCAAGAA	Hepatocellular carcinoma
CCDC73_c.812C>T_p.T271I	CCDC73_c.812C>T_p.T271I_6	AGATTACCCATATTCAAGA	Hepatocellular carcinoma
CCDC73_c.812C>T_p.T271I	CCDC73_c.812C>T_p.T271I_3	TTACCCATATTCAAGAAGA	Hepatocellular carcinoma
CCDC73_c.812C>T_p.T271I	CCDC73_c.812C>T_p.T271I_4	ATTACCCATATTCAAGAAG	Hepatocellular carcinoma
KIAA1549L_c.4642G>A_p.D1548N	KIAA1549L_c.4642G>A_p.D1548N_6	CCTCGTCGATGGATGGCTG	Hepatocellular carcinoma
KIAA1549L_c.4642G>A_p.D1548N	KIAA1549L_c.4642G>A_p.D1548N_5	CTCGTCGATGGATGGCTGG	Hepatocellular carcinoma
KIAA1549L_c.4642G>A_p.D1548N	KIAA1549L_c.4642G>A_p.D1548N_2	GTCGATGGATGGCTGGGAG	Hepatocellular carcinoma
KIAA1549L_c.4642G>A_p.D1548N	KIAA1549L_c.4642G>A_p.D1548N_3	CGTCGATGGATGGCTGGGA	Hepatocellular carcinoma
KIAA1549L_c.4642G>A_p.D1548N	KIAA1549L_c.4642G>A_p.D1548N_4	TCGTCGATGGATGGCTGGG	Hepatocellular carcinoma
TRIM44_c.869C>T_p.A290V	TRIM44_c.869C>T_p.A290V_3	CAGCTCATGTGACTGAGAT	Hepatocellular carcinoma
TRIM44_c.869C>T_p.A290V	TRIM44_c.869C>T_p.A290V_2	AGCTCATGTGACTGAGATA	Hepatocellular carcinoma
TRIM44_c.869C>T_p.A290V	TRIM44_c.869C>T_p.A290V_4	ACAGCTCATGTGACTGAGA	Hepatocellular carcinoma
TRIM44_c.869C>T_p.A290V	TRIM44_c.869C>T_p.A290V_5	CACAGCTCATGTGACTGAG	Hepatocellular carcinoma
TRIM44_c.869C>T_p.A290V	TRIM44_c.869C>T_p.A290V_6	CCACAGCTCATGTGACTGA	Hepatocellular carcinoma
RAG2_c.1378G>A_p.D460N	RAG2_c.1378G>A_p.D460N_2	ATCCATGCACTGAGCATGG	BRCA_HER-positive carcinoma
RAG2_c.1378G>A_p.D460N	RAG2_c.1378G>A_p.D460N_3	GATCCATGCACTGAGCATG	BRCA_HER-positive carcinoma
RAG2_c.1378G>A_p.D460N	RAG2_c.1378G>A_p.D460N_4	AGATCCATGCACTGAGCAT	BRCA_HER-positive carcinoma
RAG2_c.1378G>A_p.D460N	RAG2_c.1378G>A_p.D460N_5	CAGATCCATGCACTGAGCA	BRCA_HER-positive carcinoma
RAG2_c.1378G>A_p.D460N	RAG2_c.1378G>A_p.D460N_6	CCAGATCCATGCACTGAGC	BRCA_HER-positive carcinoma
B4GALNT4_c.1505G>A_p.R502H	B4GALNT4_c.1505G>A_p.R502H_4	AGGGCGGGCGGCCCTGGCG	BRCA_HER-positive carcinoma
B4GALNT4_c.1505G>A_p.R502H	B4GALNT4_c.1505G>A_p.R502H_5	AAGGGCGGGCGGCCCTGGC	BRCA_HER-positive carcinoma
B4GALNT4_c.1505G>A_p.R502H	B4GALNT4_c.1505G>A_p.R502H_6	AAAGGGCGGGCGGCCCTGG	BRCA_HER-positive carcinoma
B4GALNT4_c.1505G>A_p.R502H	B4GALNT4_c.1505G>A_p.R502H_2	GGCGGGCGGCCCTGGCGGC	BRCA_HER-positive carcinoma
B4GALNT4_c.1505G>A_p.R502H	B4GALNT4_c.1505G>A_p.R502H_3	GGGCGGGCGGCCCTGGCGG	BRCA_HER-positive carcinoma
B4GALNT4_c.2080G>A_p.E694K	B4GALNT4_c.2080G>A_p.E694K_4	AGCTCGAAGTCCACGGCGC	BRCA_HER-positive carcinoma
B4GALNT4_c.2080G>A_p.E694K	B4GALNT4_c.2080G>A_p.E694K_5	CAGCTCGAAGTCCACGGCG	BRCA_HER-positive carcinoma
B4GALNT4_c.2080G>A_p.E694K	B4GALNT4_c.2080G>A_p.E694K_2	CTCGAAGTCCACGGCGCCC	BRCA_HER-positive carcinoma
B4GALNT4_c.2080G>A_p.E694K	B4GALNT4_c.2080G>A_p.E694K_3	GCTCGAAGTCCACGGCGCC	BRCA_HER-positive carcinoma
B4GALNT4_c.2080G>A_p.E694K	B4GALNT4_c.2080G>A_p.E694K_6	GCAGCTCGAAGTCCACGGC	BRCA_HER-positive carcinoma
ANO9_c.1054G>A_p.V352M	ANO9_c.1054G>A_p.V352M_3	CCACCAGGACGTGGGCCAT	Hepatocellular carcinoma
ANO9_c.1054G>A_p.V352M	ANO9_c.1054G>A_p.V352M_4	ACCACCAGGACGTGGGCCA	Hepatocellular carcinoma
ANO9_c.1054G>A_p.V352M	ANO9_c.1054G>A_p.V352M_2	CACCAGGACGTGGGCCATG	Hepatocellular carcinoma
ANO9_c.1054G>A_p.V352M	ANO9_c.1054G>A_p.V352M_6	AGACCACCAGGACGTGGGC	Hepatocellular carcinoma
ANO9_c.1054G>A_p.V352M	ANO9_c.1054G>A_p.V352M_5	GACCACCAGGACGTGGGCC	Hepatocellular carcinoma
EXT2_c.1493G>A_p.R498Q	EXT2_c.1493G>A_p.R498Q_3	ACTCGGTCGTAGGTGAGGA	Small cell carcinoma
EXT2_c.1493G>A_p.R498Q	EXT2_c.1493G>A_p.R498Q_4	TACTCGGTCGTAGGTGAGG	Small cell carcinoma
EXT2_c.1493G>A_p.R498Q	EXT2_c.1493G>A_p.R498Q_2	CTCGGTCGTAGGTGAGGAC	Small cell carcinoma
EXT2_c.1493G>A_p.R498Q	EXT2_c.1493G>A_p.R498Q_5	CTACTCGGTCGTAGGTGAG	Small cell carcinoma
EXT2_c.1493G>A_p.R498Q	EXT2_c.1493G>A_p.R498Q_6	TCTACTCGGTCGTAGGTGA	Small cell carcinoma
CRY2_c.566C>T_p.T189I	CRY2_c.566C>T_p.T189I_2	TACATACAAGCGCTTTCAG	Hepatocellular carcinoma
CRY2_c.566C>T_p.T189I	CRY2_c.566C>T_p.T189I_3	TTACATACAAGCGCTTTCA	Hepatocellular carcinoma
CRY2_c.566C>T_p.T189I	CRY2_c.566C>T_p.T189I_6	CCCTTACATACAAGCGCTT	Hepatocellular carcinoma
CRY2_c.566C>T_p.T189I	CRY2_c.566C>T_p.T189I_4	CTTACATACAAGCGCTTTC	Hepatocellular carcinoma
CRY2_c.566C>T_p.T189I	CRY2_c.566C>T_p.T189I_5	CCTTACATACAAGCGCTTT	Hepatocellular carcinoma
MAPK8IP1_c.1504C>T_p.R502*	MAPK8IP1_c.1504C>T_p.R502*_2	CTCGACACGAAGACGAACT	BRCA_HER-positive carcinoma
MAPK8IP1_c.1504C>T_p.R502*	MAPK8IP1_c.1504C>T_p.R502*_6	GTGCCTCGACACGAAGACG	BRCA_HER-positive carcinoma
MAPK8IP1_c.1504C>T_p.R502*	MAPK8IP1_c.1504C>T_p.R502*_5	TGCCTCGACACGAAGACGA	BRCA_HER-positive carcinoma
MAPK8IP1_c.1504C>T_p.R502*	MAPK8IP1_c.1504C>T_p.R502*_3	CCTCGACACGAAGACGAAC	BRCA_HER-positive carcinoma
MAPK8IP1_c.1504C>T_p.R502*	MAPK8IP1_c.1504C>T_p.R502*_4	GCCTCGACACGAAGACGAA	BRCA_HER-positive carcinoma
OR51D1_c.602C>T_p.S201F	OR51D1_c.602C>T_p.S201F_3	TGTCCTGTACTGACACCAG	BRCA_HER-positive carcinoma
OR51D1_c.602C>T_p.S201F	OR51D1_c.602C>T_p.S201F_2	GTCCTGTACTGACACCAGG	BRCA_HER-positive carcinoma
OR51D1_c.602C>T_p.S201F	OR51D1_c.602C>T_p.S201F_4	CTGTCCTGTACTGACACCA	BRCA_HER-positive carcinoma
OR51D1_c.602C>T_p.S201F	OR51D1_c.602C>T_p.S201F_5	GCTGTCCTGTACTGACACC	BRCA_HER-positive carcinoma
OR51D1_c.602C>T_p.S201F	OR51D1_c.602C>T_p.S201F_6	AGCTGTCCTGTACTGACAC	BRCA_HER-positive carcinoma
LRP4_c.3334G>A_p.G1112S	LRP4_c.3334G>A_p.G1112S_2	GCCATCCAGATTGGCACGA	BRCA_HER-positive carcinoma
LRP4_c.3334G>A_p.G1112S	LRP4_c.3334G>A_p.G1112S_6	GTGAGCCATCCAGATTGGC	BRCA_HER-positive carcinoma
LRP4_c.3334G>A_p.G1112S	LRP4_c.3334G>A_p.G1112S_3	AGCCATCCAGATTGGCACG	BRCA_HER-positive carcinoma
LRP4_c.3334G>A_p.G1112S	LRP4_c.3334G>A_p.G1112S_4	GAGCCATCCAGATTGGCAC	BRCA_HER-positive carcinoma
LRP4_c.3334G>A_p.G1112S	LRP4_c.3334G>A_p.G1112S_5	TGAGCCATCCAGATTGGCA	BRCA_HER-positive carcinoma
SPI1_c.425C>T_p.P142L	SPI1_c.425C>T_p.P142L_4	AGCCCCCCACTGGAGGTGT	Non small cell carcinoma
SPI1_c.425C>T_p.P142L	SPI1_c.425C>T_p.P142L_5	GAGCCCCCCACTGGAGGTG	Non small cell carcinoma
SPI1_c.425C>T_p.P142L	SPI1_c.425C>T_p.P142L_6	AGAGCCCCCCACTGGAGGT	Non small cell carcinoma
SPI1_c.425C>T_p.P142L	SPI1_c.425C>T_p.P142L_2	CCCCCCACTGGAGGTGTCT	Non small cell carcinoma
SPI1_c.425C>T_p.P142L	SPI1_c.425C>T_p.P142L_3	GCCCCCCACTGGAGGTGTC	Non small cell carcinoma
OR51F1_c.74G>A_p.G25D	OR51F1_c.74G>A_p.G25D_4	AATGCCGGTCAACAAGAAG	Hepatocellular carcinoma
OR51F1_c.74G>A_p.G25D	OR51F1_c.74G>A_p.G25D_5	GAATGCCGGTCAACAAGAA	Hepatocellular carcinoma
OR51F1_c.74G>A_p.G25D	OR51F1_c.74G>A_p.G25D_2	TGCCGGTCAACAAGAAGGT	Hepatocellular carcinoma
OR51F1_c.74G>A_p.G25D	OR51F1_c.74G>A_p.G25D_3	ATGCCGGTCAACAAGAAGG	Hepatocellular carcinoma
OR51F1_c.74G>A_p.G25D	OR51F1_c.74G>A_p.G25D_6	GGAATGCCGGTCAACAAGA	Hepatocellular carcinoma
RNH1_c.901G>A_p.A301T	RNH1_c.901G>A_p.A301T_3	GGGCACCCTCATCCCCCAG	BRCA_HER-positive carcinoma
RNH1_c.901G>A_p.A301T	RNH1_c.901G>A_p.A301T_4	CGGGCACCCTCATCCCCCA	BRCA_HER-positive carcinoma
RNH1_c.901G>A_p.A301T	RNH1_c.901G>A_p.A301T_2	GGCACCCTCATCCCCCAGC	BRCA_HER-positive carcinoma
RNH1_c.901G>A_p.A301T	RNH1_c.901G>A_p.A301T_6	GTCGGGCACCCTCATCCCC	BRCA_HER-positive carcinoma
RNH1_c.901G>A_p.A301T	RNH1_c.901G>A_p.A301T_5	TCGGGCACCCTCATCCCCC	BRCA_HER-positive carcinoma
HBG1_c.227C>T_p.T76I	HBG1_c.227C>T_p.T76I_3	CCACAAAGCACCTGGATGA	Non small cell carcinoma
HBG1_c.227C>T_p.T76I	HBG1_c.227C>T_p.T76I_4	GCCACAAAGCACCTGGATG	Non small cell carcinoma
HBG1_c.227C>T_p.T76I	HBG1_c.227C>T_p.T76I_2	CACAAAGCACCTGGATGAT	Non small cell carcinoma
HBG1_c.227C>T_p.T76I	HBG1_c.227C>T_p.T76I_5	TGCCACAAAGCACCTGGAT	Non small cell carcinoma
HBG1_c.227C>T_p.T76I	HBG1_c.227C>T_p.T76I_6	ATGCCACAAAGCACCTGGA	Non small cell carcinoma
HRAS_c.35G>A_p.G12D	HRAS_c.35G>A_p.G12D_2	CGCCGGCGCCCACCACCAC	BRCA_Basal (triple-negative) carcinoma
HRAS_c.35G>A_p.G12D	HRAS_c.35G>A_p.G12D_3	CCGCCGGCGCCCACCACCA	BRCA_Basal (triple-negative) carcinoma
HRAS_c.35G>A_p.G12D	HRAS_c.35G>A_p.G12D_6	ACACCGCCGGCGCCCACCA	BRCA_Basal (triple-negative) carcinoma
HRAS_c.35G>A_p.G12D	HRAS_c.35G>A_p.G12D_4	ACCGCCGGCGCCCACCACC	BRCA_Basal (triple-negative) carcinoma
HRAS_c.35G>A_p.G12D	HRAS_c.35G>A_p.G12D_5	CACCGCCGGCGCCCACCAC	BRCA_Basal (triple-negative) carcinoma
OR52D1_c.481C>T_p.P161S	OR52D1_c.481C>T_p.P161S_2	CCCCCTTCATCTTCTTGCT	BRCA_HER-positive carcinoma
OR52D1_c.481C>T_p.P161S	OR52D1_c.481C>T_p.P161S_6	GTCTCCCCCTTCATCTTCT	BRCA_HER-positive carcinoma
OR52D1_c.481C>T_p.P161S	OR52D1_c.481C>T_p.P161S_5	TCTCCCCCTTCATCTTCTT	BRCA_HER-positive carcinoma
OR52D1_c.481C>T_p.P161S	OR52D1_c.481C>T_p.P161S_3	TCCCCCTTCATCTTCTTGC	BRCA_HER-positive carcinoma
OR52D1_c.481C>T_p.P161S	OR52D1_c.481C>T_p.P161S_4	CTCCCCCTTCATCTTCTTG	BRCA_HER-positive carcinoma
OR4A15_c.492G>A_p.M164I	OR4A15_c.492G>A_p.M164I_3	ATTCATGGTGATCAATTCA	BRCA_HER-positive carcinoma
OR4A15_c.492G>A_p.M164I	OR4A15_c.492G>A_p.M164I_2	TTCATGGTGATCAATTCAT	BRCA_HER-positive carcinoma
OR4A15_c.492G>A_p.M164I	OR4A15_c.492G>A_p.M164I_4	GATTCATGGTGATCAATTC	BRCA_HER-positive carcinoma
OR4A15_c.492G>A_p.M164I	OR4A15_c.492G>A_p.M164I_5	CGATTCATGGTGATCAATT	BRCA_HER-positive carcinoma
OR4A15_c.492G>A_p.M164I	OR4A15_c.492G>A_p.M164I_6	ACGATTCATGGTGATCAAT	BRCA_HER-positive carcinoma
OR10AG1_c.485C>T_p.T162I	OR10AG1_c.485C>T_p.T162I_2	AACTAACACAATTAATCAT	BRCA_HER-positive carcinoma
OR10AG1_c.485C>T_p.T162I	OR10AG1_c.485C>T_p.T162I_6	GCGGAACTAACACAATTAA	BRCA_HER-positive carcinoma
OR10AG1_c.485C>T_p.T162I	OR10AG1_c.485C>T_p.T162I_3	GAACTAACACAATTAATCA	BRCA_HER-positive carcinoma
OR10AG1_c.485C>T_p.T162I	OR10AG1_c.485C>T_p.T162I_4	GGAACTAACACAATTAATC	BRCA_HER-positive carcinoma
OR10AG1_c.485C>T_p.T162I	OR10AG1_c.485C>T_p.T162I_5	CGGAACTAACACAATTAAT	BRCA_HER-positive carcinoma
OR5AS1_c.704G>A_p.S235N	OR5AS1_c.704G>A_p.S235N_4	TTTGCTTCTGCCACCTGAG	BRCA_HER-positive carcinoma
OR5AS1_c.704G>A_p.S235N	OR5AS1_c.704G>A_p.S235N_5	TTTTGCTTCTGCCACCTGA	BRCA_HER-positive carcinoma
OR5AS1_c.704G>A_p.S235N	OR5AS1_c.704G>A_p.S235N_6	GTTTTGCTTCTGCCACCTG	BRCA_HER-positive carcinoma
OR5AS1_c.704G>A_p.S235N	OR5AS1_c.704G>A_p.S235N_2	TGCTTCTGCCACCTGAGGA	BRCA_HER-positive carcinoma
OR5AS1_c.704G>A_p.S235N	OR5AS1_c.704G>A_p.S235N_3	TTGCTTCTGCCACCTGAGG	BRCA_HER-positive carcinoma
APLNR_c.943C>T_p.R315C	APLNR_c.943C>T_p.R315C_4	CCCCCGCTTCCGCCAGGCC	BRCA_HER-positive carcinoma
APLNR_c.943C>T_p.R315C	APLNR_c.943C>T_p.R315C_5	ACCCCCGCTTCCGCCAGGC	BRCA_HER-positive carcinoma
APLNR_c.943C>T_p.R315C	APLNR_c.943C>T_p.R315C_2	CCCGCTTCCGCCAGGCCTG	BRCA_HER-positive carcinoma
APLNR_c.943C>T_p.R315C	APLNR_c.943C>T_p.R315C_3	CCCCGCTTCCGCCAGGCCT	BRCA_HER-positive carcinoma
APLNR_c.943C>T_p.R315C	APLNR_c.943C>T_p.R315C_6	GACCCCCGCTTCCGCCAGG	BRCA_HER-positive carcinoma
ZFP91_c.332C>T_p.P111L	ZFP91_c.332C>T_p.P111L_3	GTCCGCGACTCCTGTGAGT	Hepatocellular carcinoma
ZFP91_c.332C>T_p.P111L	ZFP91_c.332C>T_p.P111L_4	AGTCCGCGACTCCTGTGAG	Hepatocellular carcinoma
ZFP91_c.332C>T_p.P111L	ZFP91_c.332C>T_p.P111L_2	TCCGCGACTCCTGTGAGTA	Hepatocellular carcinoma
ZFP91_c.332C>T_p.P111L	ZFP91_c.332C>T_p.P111L_6	AGAGTCCGCGACTCCTGTG	Hepatocellular carcinoma
ZFP91_c.332C>T_p.P111L	ZFP91_c.332C>T_p.P111L_5	GAGTCCGCGACTCCTGTGA	Hepatocellular carcinoma
OR52E4_c.544G>A_p.E182K	OR52E4_c.544G>A_p.E182K_3	GCTCACAGTATGTGTGAGG	BRCA_HER-positive carcinoma
OR52E4_c.544G>A_p.E182K	OR52E4_c.544G>A_p.E182K_4	TGCTCACAGTATGTGTGAG	BRCA_HER-positive carcinoma
OR52E4_c.544G>A_p.E182K	OR52E4_c.544G>A_p.E182K_2	CTCACAGTATGTGTGAGGT	BRCA_HER-positive carcinoma
OR52E4_c.544G>A_p.E182K	OR52E4_c.544G>A_p.E182K_5	GTGCTCACAGTATGTGTGA	BRCA_HER-positive carcinoma
OR52E4_c.544G>A_p.E182K	OR52E4_c.544G>A_p.E182K_6	TGTGCTCACAGTATGTGTG	BRCA_HER-positive carcinoma
OR4D9_c.656C>T_p.T219M	OR4D9_c.656C>T_p.T219M_2	CACGGTCATCTTGATGATG	BRCA_HER-positive carcinoma
OR4D9_c.656C>T_p.T219M	OR4D9_c.656C>T_p.T219M_3	ACACGGTCATCTTGATGAT	BRCA_HER-positive carcinoma
OR4D9_c.656C>T_p.T219M	OR4D9_c.656C>T_p.T219M_6	CTTACACGGTCATCTTGAT	BRCA_HER-positive carcinoma
OR4D9_c.656C>T_p.T219M	OR4D9_c.656C>T_p.T219M_4	TACACGGTCATCTTGATGA	BRCA_HER-positive carcinoma
OR4D9_c.656C>T_p.T219M	OR4D9_c.656C>T_p.T219M_5	TTACACGGTCATCTTGATG	BRCA_HER-positive carcinoma
FAM160A2_c.2042G>A_p.G681D	FAM160A2_c.2042G>A_p.G681D_2	TGCCCTCGGAGATGCCCTC	Small cell carcinoma
FAM160A2_c.2042G>A_p.G681D	FAM160A2_c.2042G>A_p.G681D_6	GCCATGCCCTCGGAGATGC	Small cell carcinoma
FAM160A2_c.2042G>A_p.G681D	FAM160A2_c.2042G>A_p.G681D_5	CCATGCCCTCGGAGATGCC	Small cell carcinoma
FAM160A2_c.2042G>A_p.G681D	FAM160A2_c.2042G>A_p.G681D_3	ATGCCCTCGGAGATGCCCT	Small cell carcinoma
FAM160A2_c.2042G>A_p.G681D	FAM160A2_c.2042G>A_p.G681D_4	CATGCCCTCGGAGATGCCC	Small cell carcinoma
CNGA4_c.646C>T_p.R216C	CNGA4_c.646C>T_p.R216C_6	CTGCGGCGCCAGTACCTCT	Hepatocellular carcinoma
CNGA4_c.646C>T_p.R216C	CNGA4_c.646C>T_p.R216C_5	TGCGGCGCCAGTACCTCTA	Hepatocellular carcinoma
CNGA4_c.646C>T_p.R216C	CNGA4_c.646C>T_p.R216C_4	GCGGCGCCAGTACCTCTAT	Hepatocellular carcinoma
CNGA4_c.646C>T_p.R216C	CNGA4_c.646C>T_p.R216C_3	CGGCGCCAGTACCTCTATA	Hepatocellular carcinoma
CNGA4_c.646C>T_p.R216C	CNGA4_c.646C>T_p.R216C_2	GGCGCCAGTACCTCTATAG	Hepatocellular carcinoma
CNGA4_c.1492C>T_p.R498*	CNGA4_c.1492C>T_p.R498*_3	CTACGAGGCCTAGACCAGC	BRCA_HER-positive carcinoma
CNGA4_c.1492C>T_p.R498*	CNGA4_c.1492C>T_p.R498*_4	GCTACGAGGCCTAGACCAG	BRCA_HER-positive carcinoma
CNGA4_c.1492C>T_p.R498*	CNGA4_c.1492C>T_p.R498*_5	GGCTACGAGGCCTAGACCA	BRCA_HER-positive carcinoma
CNGA4_c.1492C>T_p.R498*	CNGA4_c.1492C>T_p.R498*_2	TACGAGGCCTAGACCAGCA	BRCA_HER-positive carcinoma
CNGA4_c.1492C>T_p.R498*	CNGA4_c.1492C>T_p.R498*_6	CGGCTACGAGGCCTAGACC	BRCA_HER-positive carcinoma
AHNAK_c.5093C>T_p.A1698V	AHNAK_c.5093C>T_p.A1698V_3	ATGCCCCAGATGTGGAGGT	Small cell carcinoma
AHNAK_c.5093C>T_p.A1698V	AHNAK_c.5093C>T_p.A1698V_4	GATGCCCCAGATGTGGAGG	Small cell carcinoma
AHNAK_c.5093C>T_p.A1698V	AHNAK_c.5093C>T_p.A1698V_2	TGCCCCAGATGTGGAGGTT	Small cell carcinoma
AHNAK_c.5093C>T_p.A1698V	AHNAK_c.5093C>T_p.A1698V_5	TGATGCCCCAGATGTGGAG	Small cell carcinoma
AHNAK_c.5093C>T_p.A1698V	AHNAK_c.5093C>T_p.A1698V_6	TTGATGCCCCAGATGTGGA	Small cell carcinoma
AHNAK_c.2070G>A_p.M690I	AHNAK_c.2070G>A_p.M690I_3	ACTCATATCAGGCAGCTTA	Hepatocellular carcinoma
AHNAK_c.2070G>A_p.M690I	AHNAK_c.2070G>A_p.M690I_4	CACTCATATCAGGCAGCTT	Hepatocellular carcinoma
AHNAK_c.2070G>A_p.M690I	AHNAK_c.2070G>A_p.M690I_2	CTCATATCAGGCAGCTTAA	Hepatocellular carcinoma
AHNAK_c.2070G>A_p.M690I	AHNAK_c.2070G>A_p.M690I_5	ACACTCATATCAGGCAGCT	Hepatocellular carcinoma
AHNAK_c.2070G>A_p.M690I	AHNAK_c.2070G>A_p.M690I_6	GACACTCATATCAGGCAGC	Hepatocellular carcinoma
INTS5_c.620C>T_p.A207V	INTS5_c.620C>T_p.A207V_3	ATGCGTGTGTGGATGCCTT	Non small cell carcinoma
INTS5_c.620C>T_p.A207V	INTS5_c.620C>T_p.A207V_2	TGCGTGTGTGGATGCCTTG	Non small cell carcinoma
INTS5_c.620C>T_p.A207V	INTS5_c.620C>T_p.A207V_4	GATGCGTGTGTGGATGCCT	Non small cell carcinoma
INTS5_c.620C>T_p.A207V	INTS5_c.620C>T_p.A207V_5	AGATGCGTGTGTGGATGCC	Non small cell carcinoma
INTS5_c.620C>T_p.A207V	INTS5_c.620C>T_p.A207V_6	CAGATGCGTGTGTGGATGC	Non small cell carcinoma
MEN1_c.378G>A_p.W126*	MEN1_c.378G>A_p.W126*_2	TTCCATATGACATCGGAGA	BRCA_HER-positive carcinoma
MEN1_c.378G>A_p.W126*	MEN1_c.378G>A_p.W126*_6	GCTGTTCCATATGACATCG	BRCA_HER-positive carcinoma
MEN1_c.378G>A_p.W126*	MEN1_c.378G>A_p.W126*_3	GTTCCATATGACATCGGAG	BRCA_HER-positive carcinoma
MEN1_c.378G>A_p.W126*	MEN1_c.378G>A_p.W126*_4	TGTTCCATATGACATCGGA	BRCA_HER-positive carcinoma
MEN1_c.378G>A_p.W126*	MEN1_c.378G>A_p.W126*_5	CTGTTCCATATGACATCGG	BRCA_HER-positive carcinoma
VPS51_c.1085G>A_p.G362D	VPS51_c.1085G>A_p.G362D_2	CACCACCCTGCTCCTGCGC	Hepatocellular carcinoma
VPS51_c.1085G>A_p.G362D	VPS51_c.1085G>A_p.G362D_6	TCACCACCACCCTGCTCCT	Hepatocellular carcinoma
VPS51_c.1085G>A_p.G362D	VPS51_c.1085G>A_p.G362D_3	CCACCACCCTGCTCCTGCG	Hepatocellular carcinoma
VPS51_c.1085G>A_p.G362D	VPS51_c.1085G>A_p.G362D_4	ACCACCACCCTGCTCCTGC	Hepatocellular carcinoma
VPS51_c.1085G>A_p.G362D	VPS51_c.1085G>A_p.G362D_5	CACCACCACCCTGCTCCTG	Hepatocellular carcinoma
DNHD1_c.5003G>A_p.R1668Q	DNHD1_c.5003G>A_p.R1668Q_5	CTGGCCGTTCAGGCAGTAG	BRCA_HER-positive carcinoma
DNHD1_c.5003G>A_p.R1668Q	DNHD1_c.5003G>A_p.R1668Q_2	GCCGTTCAGGCAGTAGGCT	BRCA_HER-positive carcinoma
DNHD1_c.5003G>A_p.R1668Q	DNHD1_c.5003G>A_p.R1668Q_3	GGCCGTTCAGGCAGTAGGC	BRCA_HER-positive carcinoma
DNHD1_c.5003G>A_p.R1668Q	DNHD1_c.5003G>A_p.R1668Q_4	TGGCCGTTCAGGCAGTAGG	BRCA_HER-positive carcinoma
DNHD1_c.5003G>A_p.R1668Q	DNHD1_c.5003G>A_p.R1668Q_6	GCTGGCCGTTCAGGCAGTA	BRCA_HER-positive carcinoma
DNHD1_c.13132G>A_p.E4378K	DNHD1_c.13132G>A_p.E4378K_5	GCACTCTGCCATTGCATCC	BRCA_HER-positive carcinoma
DNHD1_c.13132G>A_p.E4378K	DNHD1_c.13132G>A_p.E4378K_6	TGCACTCTGCCATTGCATC	BRCA_HER-positive carcinoma
DNHD1_c.13132G>A_p.E4378K	DNHD1_c.13132G>A_p.E4378K_2	CTCTGCCATTGCATCCAGC	BRCA_HER-positive carcinoma
DNHD1_c.13132G>A_p.E4378K	DNHD1_c.13132G>A_p.E4378K_3	ACTCTGCCATTGCATCCAG	BRCA_HER-positive carcinoma
DNHD1_c.13132G>A_p.E4378K	DNHD1_c.13132G>A_p.E4378K_4	CACTCTGCCATTGCATCCA	BRCA_HER-positive carcinoma
SART1_c.1772C>T_p.S591L	SART1_c.1772C>T_p.S591L_2	CTCAGCCAACGGTGGCTCC	BRCA_HER-positive carcinoma
SART1_c.1772C>T_p.S591L	SART1_c.1772C>T_p.S591L_3	GCTCAGCCAACGGTGGCTC	BRCA_HER-positive carcinoma
SART1_c.1772C>T_p.S591L	SART1_c.1772C>T_p.S591L_4	CGCTCAGCCAACGGTGGCT	BRCA_HER-positive carcinoma
SART1_c.1772C>T_p.S591L	SART1_c.1772C>T_p.S591L_5	GCGCTCAGCCAACGGTGGC	BRCA_HER-positive carcinoma
SART1_c.1772C>T_p.S591L	SART1_c.1772C>T_p.S591L_6	AGCGCTCAGCCAACGGTGG	BRCA_HER-positive carcinoma
DCHS1_c.4835G>A_p.R1612Q	DCHS1_c.4835G>A_p.R1612Q_2	CTCGTTGTTCGCGGTCCAA	BRCA_HER-positive carcinoma
DCHS1_c.4835G>A_p.R1612Q	DCHS1_c.4835G>A_p.R1612Q_3	GCTCGTTGTTCGCGGTCCA	BRCA_HER-positive carcinoma
DCHS1_c.4835G>A_p.R1612Q	DCHS1_c.4835G>A_p.R1612Q_4	AGCTCGTTGTTCGCGGTCC	BRCA_HER-positive carcinoma
DCHS1_c.4835G>A_p.R1612Q	DCHS1_c.4835G>A_p.R1612Q_5	CAGCTCGTTGTTCGCGGTC	BRCA_HER-positive carcinoma
DCHS1_c.4835G>A_p.R1612Q	DCHS1_c.4835G>A_p.R1612Q_6	TCAGCTCGTTGTTCGCGGT	BRCA_HER-positive carcinoma
SPTBN2_c.3832C>T_p.R1278W	SPTBN2_c.3832C>T_p.R1278W_3	AACCGGGAGCAGCAGCATT	Hepatocellular carcinoma
SPTBN2_c.3832C>T_p.R1278W	SPTBN2_c.3832C>T_p.R1278W_4	CAACCGGGAGCAGCAGCAT	Hepatocellular carcinoma
SPTBN2_c.3832C>T_p.R1278W	SPTBN2_c.3832C>T_p.R1278W_2	ACCGGGAGCAGCAGCATTT	Hepatocellular carcinoma
SPTBN2_c.3832C>T_p.R1278W	SPTBN2_c.3832C>T_p.R1278W_5	ACAACCGGGAGCAGCAGCA	Hepatocellular carcinoma
SPTBN2_c.3832C>T_p.R1278W	SPTBN2_c.3832C>T_p.R1278W_6	GACAACCGGGAGCAGCAGC	Hepatocellular carcinoma
PC_c.2643G>A_p.M881I	PC_c.2643G>A_p.M881I_3	CCCCATGCTGTGGGCCTGG	Non small cell carcinoma
PC_c.2643G>A_p.M881I	PC_c.2643G>A_p.M881I_2	CCCATGCTGTGGGCCTGGA	Non small cell carcinoma
PC_c.2643G>A_p.M881I	PC_c.2643G>A_p.M881I_4	GCCCCATGCTGTGGGCCTG	Non small cell carcinoma
PC_c.2643G>A_p.M881I	PC_c.2643G>A_p.M881I_5	AGCCCCATGCTGTGGGCCT	Non small cell carcinoma
PC_c.2643G>A_p.M881I	PC_c.2643G>A_p.M881I_6	AAGCCCCATGCTGTGGGCC	Non small cell carcinoma
KDM2A_c.1669G>A_p.A557T	KDM2A_c.1669G>A_p.A557T_2	GGCAGCAGCTGGCCTCACA	BRCA_HER-positive carcinoma
KDM2A_c.1669G>A_p.A557T	KDM2A_c.1669G>A_p.A557T_6	GGGAGGCAGCAGCTGGCCT	BRCA_HER-positive carcinoma
KDM2A_c.1669G>A_p.A557T	KDM2A_c.1669G>A_p.A557T_3	AGGCAGCAGCTGGCCTCAC	BRCA_HER-positive carcinoma
KDM2A_c.1669G>A_p.A557T	KDM2A_c.1669G>A_p.A557T_4	GAGGCAGCAGCTGGCCTCA	BRCA_HER-positive carcinoma
KDM2A_c.1669G>A_p.A557T	KDM2A_c.1669G>A_p.A557T_5	GGAGGCAGCAGCTGGCCTC	BRCA_HER-positive carcinoma
ALDH3B2_c.448C>T_p.R150C	ALDH3B2_c.448C>T_p.R150C_2	ACCGCGTGGCCTGGTTCTG	Non small cell carcinoma
ALDH3B2_c.448C>T_p.R150C	ALDH3B2_c.448C>T_p.R150C_6	GCCAACCGCGTGGCCTGGT	Non small cell carcinoma
ALDH3B2_c.448C>T_p.R150C	ALDH3B2_c.448C>T_p.R150C_3	AACCGCGTGGCCTGGTTCT	Non small cell carcinoma
ALDH3B2_c.448C>T_p.R150C	ALDH3B2_c.448C>T_p.R150C_4	CAACCGCGTGGCCTGGTTC	Non small cell carcinoma
ALDH3B2_c.448C>T_p.R150C	ALDH3B2_c.448C>T_p.R150C_5	CCAACCGCGTGGCCTGGTT	Non small cell carcinoma
LRP5_c.2626G>A_p.G876S	LRP5_c.2626G>A_p.G876S_5	CCGGCCGCTAGTCTTGTCG	BRCA_HER-positive carcinoma
LRP5_c.2626G>A_p.G876S	LRP5_c.2626G>A_p.G876S_2	GCCGCTAGTCTTGTCGGCC	BRCA_HER-positive carcinoma
LRP5_c.2626G>A_p.G876S	LRP5_c.2626G>A_p.G876S_3	GGCCGCTAGTCTTGTCGGC	BRCA_HER-positive carcinoma
LRP5_c.2626G>A_p.G876S	LRP5_c.2626G>A_p.G876S_4	CGGCCGCTAGTCTTGTCGG	BRCA_HER-positive carcinoma
LRP5_c.2626G>A_p.G876S	LRP5_c.2626G>A_p.G876S_6	TCCGGCCGCTAGTCTTGTC	BRCA_HER-positive carcinoma
GAL_c.319C>T_p.R107C	GAL_c.319C>T_p.R107C_5	TCGACCGCCTCCTGGATCT	Hepatocellular carcinoma
GAL_c.319C>T_p.R107C	GAL_c.319C>T_p.R107C_6	CTCGACCGCCTCCTGGATC	Hepatocellular carcinoma
GAL_c.319C>T_p.R107C	GAL_c.319C>T_p.R107C_2	ACCGCCTCCTGGATCTCCC	Hepatocellular carcinoma
GAL_c.319C>T_p.R107C	GAL_c.319C>T_p.R107C_3	GACCGCCTCCTGGATCTCC	Hepatocellular carcinoma
GAL_c.319C>T_p.R107C	GAL_c.319C>T_p.R107C_4	CGACCGCCTCCTGGATCTC	Hepatocellular carcinoma
IGHMBP2_c.1690G>A_p.V564I	IGHMBP2_c.1690G>A_p.V564I_2	GACAGACTTGATTTCAAGC	Hepatocellular carcinoma
IGHMBP2_c.1690G>A_p.V564I	IGHMBP2_c.1690G>A_p.V564I_3	CGACAGACTTGATTTCAAG	Hepatocellular carcinoma
IGHMBP2_c.1690G>A_p.V564I	IGHMBP2_c.1690G>A_p.V564I_4	TCGACAGACTTGATTTCAA	Hepatocellular carcinoma
IGHMBP2_c.1690G>A_p.V564I	IGHMBP2_c.1690G>A_p.V564I_5	ATCGACAGACTTGATTTCA	Hepatocellular carcinoma
IGHMBP2_c.1690G>A_p.V564I	IGHMBP2_c.1690G>A_p.V564I_6	CATCGACAGACTTGATTTC	Hepatocellular carcinoma
MRGPRF_c.803C>T_p.P268L	MRGPRF_c.803C>T_p.P268L_2	CCCGGCCCCCTTCCCCGAG	BRCA_HER-positive carcinoma
MRGPRF_c.803C>T_p.P268L	MRGPRF_c.803C>T_p.P268L_3	TCCCGGCCCCCTTCCCCGA	BRCA_HER-positive carcinoma
MRGPRF_c.803C>T_p.P268L	MRGPRF_c.803C>T_p.P268L_4	ATCCCGGCCCCCTTCCCCG	BRCA_HER-positive carcinoma
MRGPRF_c.803C>T_p.P268L	MRGPRF_c.803C>T_p.P268L_5	GATCCCGGCCCCCTTCCCC	BRCA_HER-positive carcinoma
MRGPRF_c.803C>T_p.P268L	MRGPRF_c.803C>T_p.P268L_6	AGATCCCGGCCCCCTTCCC	BRCA_HER-positive carcinoma
TPCN2_c.1387G>A_p.E463K	TPCN2_c.1387G>A_p.E463K_3	GCTCAGCAGGCAGCACATC	BRCA_HER-positive carcinoma
TPCN2_c.1387G>A_p.E463K	TPCN2_c.1387G>A_p.E463K_4	CGCTCAGCAGGCAGCACAT	BRCA_HER-positive carcinoma
TPCN2_c.1387G>A_p.E463K	TPCN2_c.1387G>A_p.E463K_2	CTCAGCAGGCAGCACATCT	BRCA_HER-positive carcinoma
TPCN2_c.1387G>A_p.E463K	TPCN2_c.1387G>A_p.E463K_5	ACGCTCAGCAGGCAGCACA	BRCA_HER-positive carcinoma
TPCN2_c.1387G>A_p.E463K	TPCN2_c.1387G>A_p.E463K_6	CACGCTCAGCAGGCAGCAC	BRCA_HER-positive carcinoma
TPCN2_c.1595C>T_p.P532L	TPCN2_c.1595C>T_p.P532L_3	GGCCGGAGATGGTGGGCCT	Non small cell carcinoma
TPCN2_c.1595C>T_p.P532L	TPCN2_c.1595C>T_p.P532L_2	GCCGGAGATGGTGGGCCTG	Non small cell carcinoma
TPCN2_c.1595C>T_p.P532L	TPCN2_c.1595C>T_p.P532L_4	AGGCCGGAGATGGTGGGCC	Non small cell carcinoma
TPCN2_c.1595C>T_p.P532L	TPCN2_c.1595C>T_p.P532L_5	GAGGCCGGAGATGGTGGGC	Non small cell carcinoma
TPCN2_c.1595C>T_p.P532L	TPCN2_c.1595C>T_p.P532L_6	GGAGGCCGGAGATGGTGGG	Non small cell carcinoma
FGF3_c.670C>T_p.H224Y	FGF3_c.670C>T_p.H224Y_2	CTCACGTTCAGGCTTCGAG	BRCA_HER-positive carcinoma
FGF3_c.670C>T_p.H224Y	FGF3_c.670C>T_p.H224Y_6	CCCTCTCACGTTCAGGCTT	BRCA_HER-positive carcinoma
FGF3_c.670C>T_p.H224Y	FGF3_c.670C>T_p.H224Y_3	TCTCACGTTCAGGCTTCGA	BRCA_HER-positive carcinoma
FGF3_c.670C>T_p.H224Y	FGF3_c.670C>T_p.H224Y_4	CTCTCACGTTCAGGCTTCG	BRCA_HER-positive carcinoma
FGF3_c.670C>T_p.H224Y	FGF3_c.670C>T_p.H224Y_5	CCTCTCACGTTCAGGCTTC	BRCA_HER-positive carcinoma
INPPL1_c.1561C>T_p.R521C	INPPL1_c.1561C>T_p.R521C_2	ACCGTATCAGCCATGTCAG	BRCA_HER-positive carcinoma
INPPL1_c.1561C>T_p.R521C	INPPL1_c.1561C>T_p.R521C_6	GAGAACCGTATCAGCCATG	BRCA_HER-positive carcinoma
INPPL1_c.1561C>T_p.R521C	INPPL1_c.1561C>T_p.R521C_3	AACCGTATCAGCCATGTCA	BRCA_HER-positive carcinoma
INPPL1_c.1561C>T_p.R521C	INPPL1_c.1561C>T_p.R521C_4	GAACCGTATCAGCCATGTC	BRCA_HER-positive carcinoma
INPPL1_c.1561C>T_p.R521C	INPPL1_c.1561C>T_p.R521C_5	AGAACCGTATCAGCCATGT	BRCA_HER-positive carcinoma
PLEKHB1_c.269G>A_p.R90Q	PLEKHB1_c.269G>A_p.R90Q_5	GGCTCCGGCCCTCTGGGGG	Non small cell carcinoma
PLEKHB1_c.269G>A_p.R90Q	PLEKHB1_c.269G>A_p.R90Q_2	TCCGGCCCTCTGGGGGCTG	Non small cell carcinoma
PLEKHB1_c.269G>A_p.R90Q	PLEKHB1_c.269G>A_p.R90Q_3	CTCCGGCCCTCTGGGGGCT	Non small cell carcinoma
PLEKHB1_c.269G>A_p.R90Q	PLEKHB1_c.269G>A_p.R90Q_4	GCTCCGGCCCTCTGGGGGC	Non small cell carcinoma
PLEKHB1_c.269G>A_p.R90Q	PLEKHB1_c.269G>A_p.R90Q_6	CGGCTCCGGCCCTCTGGGG	Non small cell carcinoma
RSF1_c.2224C>T_p.R742W	RSF1_c.2224C>T_p.R742W_6	TCAAGTCGGAAAAAGAAGC	BRCA_HER-positive carcinoma
RSF1_c.2224C>T_p.R742W	RSF1_c.2224C>T_p.R742W_5	CAAGTCGGAAAAAGAAGCC	BRCA_HER-positive carcinoma
RSF1_c.2224C>T_p.R742W	RSF1_c.2224C>T_p.R742W_2	GTCGGAAAAAGAAGCCCGA	BRCA_HER-positive carcinoma
RSF1_c.2224C>T_p.R742W	RSF1_c.2224C>T_p.R742W_3	AGTCGGAAAAAGAAGCCCG	BRCA_HER-positive carcinoma
RSF1_c.2224C>T_p.R742W	RSF1_c.2224C>T_p.R742W_4	AAGTCGGAAAAAGAAGCCC	BRCA_HER-positive carcinoma
USP35_c.1513C>T_p.L505F	USP35_c.1513C>T_p.L505F_3	TTCCTCTCCGCATCCTGGA	Non small cell carcinoma
USP35_c.1513C>T_p.L505F	USP35_c.1513C>T_p.L505F_4	CTTCCTCTCCGCATCCTGG	Non small cell carcinoma
USP35_c.1513C>T_p.L505F	USP35_c.1513C>T_p.L505F_5	ACTTCCTCTCCGCATCCTG	Non small cell carcinoma
USP35_c.1513C>T_p.L505F	USP35_c.1513C>T_p.L505F_6	AACTTCCTCTCCGCATCCT	Non small cell carcinoma
USP35_c.1513C>T_p.L505F	USP35_c.1513C>T_p.L505F_2	TCCTCTCCGCATCCTGGAC	Non small cell carcinoma
GAB2_c.482C>T_p.P161L	GAB2_c.482C>T_p.P161L_3	CCCCATCACACTCCAGCCA	Non small cell carcinoma
GAB2_c.482C>T_p.P161L	GAB2_c.482C>T_p.P161L_4	GCCCCATCACACTCCAGCC	Non small cell carcinoma
GAB2_c.482C>T_p.P161L	GAB2_c.482C>T_p.P161L_5	AGCCCCATCACACTCCAGC	Non small cell carcinoma
GAB2_c.482C>T_p.P161L	GAB2_c.482C>T_p.P161L_2	CCCATCACACTCCAGCCAG	Non small cell carcinoma
GAB2_c.482C>T_p.P161L	GAB2_c.482C>T_p.P161L_6	CAGCCCCATCACACTCCAG	Non small cell carcinoma
TENM4_c.3367G>A_p.V1123I	TENM4_c.3367G>A_p.V1123I_4	TAGACGTCTGTCTTGTCCC	BRCA_HER-positive carcinoma
TENM4_c.3367G>A_p.V1123I	TENM4_c.3367G>A_p.V1123I_5	GTAGACGTCTGTCTTGTCC	BRCA_HER-positive carcinoma
TENM4_c.3367G>A_p.V1123I	TENM4_c.3367G>A_p.V1123I_2	GACGTCTGTCTTGTCCCAA	BRCA_HER-positive carcinoma
TENM4_c.3367G>A_p.V1123I	TENM4_c.3367G>A_p.V1123I_3	AGACGTCTGTCTTGTCCCA	BRCA_HER-positive carcinoma
TENM4_c.3367G>A_p.V1123I	TENM4_c.3367G>A_p.V1123I_6	TGTAGACGTCTGTCTTGTC	BRCA_HER-positive carcinoma
NLRP10_c.1474C>T_p.R492C	NLRP10_c.1474C>T_p.R492C_4	GTCCCGCAGAGAAGTGCAA	Non small cell carcinoma
NLRP10_c.1474C>T_p.R492C	NLRP10_c.1474C>T_p.R492C_2	CCCGCAGAGAAGTGCAAAG	Non small cell carcinoma
NLRP10_c.1474C>T_p.R492C	NLRP10_c.1474C>T_p.R492C_3	TCCCGCAGAGAAGTGCAAA	Non small cell carcinoma
NLRP10_c.1474C>T_p.R492C	NLRP10_c.1474C>T_p.R492C_5	AGTCCCGCAGAGAAGTGCA	Non small cell carcinoma
NLRP10_c.1474C>T_p.R492C	NLRP10_c.1474C>T_p.R492C_6	GAGTCCCGCAGAGAAGTGC	Non small cell carcinoma
PCF11_c.1730C>T_p.S577L	PCF11_c.1730C>T_p.S577L_3	AGTCAGGCACTGAACCAAA	BRCA_HER-positive carcinoma
PCF11_c.1730C>T_p.S577L	PCF11_c.1730C>T_p.S577L_2	GTCAGGCACTGAACCAAAG	BRCA_HER-positive carcinoma
PCF11_c.1730C>T_p.S577L	PCF11_c.1730C>T_p.S577L_6	CAAAGTCAGGCACTGAACC	BRCA_HER-positive carcinoma
PCF11_c.1730C>T_p.S577L	PCF11_c.1730C>T_p.S577L_4	AAGTCAGGCACTGAACCAA	BRCA_HER-positive carcinoma
PCF11_c.1730C>T_p.S577L	PCF11_c.1730C>T_p.S577L_5	AAAGTCAGGCACTGAACCA	BRCA_HER-positive carcinoma
FZD4_c.587G>A_p.R196K	FZD4_c.587G>A_p.R196K_3	CTCCTTTTCACCCAGATGT	Hepatocellular carcinoma
FZD4_c.587G>A_p.R196K	FZD4_c.587G>A_p.R196K_2	TCCTTTTCACCCAGATGTA	Hepatocellular carcinoma
FZD4_c.587G>A_p.R196K	FZD4_c.587G>A_p.R196K_4	GCTCCTTTTCACCCAGATG	Hepatocellular carcinoma
FZD4_c.587G>A_p.R196K	FZD4_c.587G>A_p.R196K_5	GGCTCCTTTTCACCCAGAT	Hepatocellular carcinoma
FZD4_c.587G>A_p.R196K	FZD4_c.587G>A_p.R196K_6	AGGCTCCTTTTCACCCAGA	Hepatocellular carcinoma
TRIM64B_c.1093G>A_p.A365T	TRIM64B_c.1093G>A_p.A365T_2	GGCATCTGCAGTCCTGGAA	Small cell carcinoma
TRIM64B_c.1093G>A_p.A365T	TRIM64B_c.1093G>A_p.A365T_6	AATTGGCATCTGCAGTCCT	Small cell carcinoma
TRIM64B_c.1093G>A_p.A365T	TRIM64B_c.1093G>A_p.A365T_3	TGGCATCTGCAGTCCTGGA	Small cell carcinoma
TRIM64B_c.1093G>A_p.A365T	TRIM64B_c.1093G>A_p.A365T_4	TTGGCATCTGCAGTCCTGG	Small cell carcinoma
TRIM64B_c.1093G>A_p.A365T	TRIM64B_c.1093G>A_p.A365T_5	ATTGGCATCTGCAGTCCTG	Small cell carcinoma
NR1H4_c.1100G>A_p.R367Q	NR1H4_c.1100G>A_p.R367Q_6	CTATTTCGAATTCTTTCTT	Non small cell carcinoma
NR1H4_c.1100G>A_p.R367Q	NR1H4_c.1100G>A_p.R367Q_5	TATTTCGAATTCTTTCTTC	Non small cell carcinoma
NR1H4_c.1100G>A_p.R367Q	NR1H4_c.1100G>A_p.R367Q_2	TTCGAATTCTTTCTTCCAA	Non small cell carcinoma
NR1H4_c.1100G>A_p.R367Q	NR1H4_c.1100G>A_p.R367Q_3	TTTCGAATTCTTTCTTCCA	Non small cell carcinoma
NR1H4_c.1100G>A_p.R367Q	NR1H4_c.1100G>A_p.R367Q_4	ATTTCGAATTCTTTCTTCC	Non small cell carcinoma
APPL2_c.916C>T_p.L306F	APPL2_c.916C>T_p.L306F_2	GGCTTTATTTCTTCACCCA	Small cell carcinoma
APPL2_c.916C>T_p.L306F	APPL2_c.916C>T_p.L306F_3	AGGCTTTATTTCTTCACCC	Small cell carcinoma
APPL2_c.916C>T_p.L306F	APPL2_c.916C>T_p.L306F_4	GAGGCTTTATTTCTTCACC	Small cell carcinoma
APPL2_c.916C>T_p.L306F	APPL2_c.916C>T_p.L306F_5	AGAGGCTTTATTTCTTCAC	Small cell carcinoma
APPL2_c.916C>T_p.L306F	APPL2_c.916C>T_p.L306F_6	GAGAGGCTTTATTTCTTCA	Small cell carcinoma
TAS2R13_c.763G>A_p.E255K	TAS2R13_c.763G>A_p.E255K_2	CTCAGAAATCCATGATATG	BRCA_HER-positive carcinoma
TAS2R13_c.763G>A_p.E255K	TAS2R13_c.763G>A_p.E255K_3	GCTCAGAAATCCATGATAT	BRCA_HER-positive carcinoma
TAS2R13_c.763G>A_p.E255K	TAS2R13_c.763G>A_p.E255K_4	AGCTCAGAAATCCATGATA	BRCA_HER-positive carcinoma
TAS2R13_c.763G>A_p.E255K	TAS2R13_c.763G>A_p.E255K_5	CAGCTCAGAAATCCATGAT	BRCA_HER-positive carcinoma
TAS2R13_c.763G>A_p.E255K	TAS2R13_c.763G>A_p.E255K_6	ACAGCTCAGAAATCCATGA	BRCA_HER-positive carcinoma
ACACB_c.691C>T_p.R231W	ACACB_c.691C>T_p.R231W_4	GGGACGGGAACACAAGAAG	BRCA_HER-positive carcinoma
ACACB_c.691C>T_p.R231W	ACACB_c.691C>T_p.R231W_5	GGGGACGGGAACACAAGAA	BRCA_HER-positive carcinoma
ACACB_c.691C>T_p.R231W	ACACB_c.691C>T_p.R231W_2	GACGGGAACACAAGAAGCT	BRCA_HER-positive carcinoma
ACACB_c.691C>T_p.R231W	ACACB_c.691C>T_p.R231W_3	GGACGGGAACACAAGAAGC	BRCA_HER-positive carcinoma
ACACB_c.691C>T_p.R231W	ACACB_c.691C>T_p.R231W_6	AGGGGACGGGAACACAAGA	BRCA_HER-positive carcinoma
UBE3B_c.1361C>T_p.S454F	UBE3B_c.1361C>T_p.S454F_4	GACTCTGCAGAAGTCCAGA	BRCA_HER-positive carcinoma
UBE3B_c.1361C>T_p.S454F	UBE3B_c.1361C>T_p.S454F_2	CTCTGCAGAAGTCCAGAAG	BRCA_HER-positive carcinoma
UBE3B_c.1361C>T_p.S454F	UBE3B_c.1361C>T_p.S454F_3	ACTCTGCAGAAGTCCAGAA	BRCA_HER-positive carcinoma
UBE3B_c.1361C>T_p.S454F	UBE3B_c.1361C>T_p.S454F_5	CGACTCTGCAGAAGTCCAG	BRCA_HER-positive carcinoma
UBE3B_c.1361C>T_p.S454F	UBE3B_c.1361C>T_p.S454F_6	TCGACTCTGCAGAAGTCCA	BRCA_HER-positive carcinoma
GLTP_c.404C>T_p.A135V	GLTP_c.404C>T_p.A135V_3	TGGCCCTCAAGAAGTACCA	Hepatocellular carcinoma
GLTP_c.404C>T_p.A135V	GLTP_c.404C>T_p.A135V_2	GGCCCTCAAGAAGTACCAT	Hepatocellular carcinoma
GLTP_c.404C>T_p.A135V	GLTP_c.404C>T_p.A135V_6	AGATGGCCCTCAAGAAGTA	Hepatocellular carcinoma
GLTP_c.404C>T_p.A135V	GLTP_c.404C>T_p.A135V_4	ATGGCCCTCAAGAAGTACC	Hepatocellular carcinoma
GLTP_c.404C>T_p.A135V	GLTP_c.404C>T_p.A135V_5	GATGGCCCTCAAGAAGTAC	Hepatocellular carcinoma
ANKRD13A_c.896C>T_p.P299L	ANKRD13A_c.896C>T_p.P299L_3	ACCCGCTGGAATCTTTGCT	Small cell carcinoma
ANKRD13A_c.896C>T_p.P299L	ANKRD13A_c.896C>T_p.P299L_2	CCCGCTGGAATCTTTGCTG	Small cell carcinoma
ANKRD13A_c.896C>T_p.P299L	ANKRD13A_c.896C>T_p.P299L_4	AACCCGCTGGAATCTTTGC	Small cell carcinoma
ANKRD13A_c.896C>T_p.P299L	ANKRD13A_c.896C>T_p.P299L_5	GAACCCGCTGGAATCTTTG	Small cell carcinoma
ANKRD13A_c.896C>T_p.P299L	ANKRD13A_c.896C>T_p.P299L_6	GGAACCCGCTGGAATCTTT	Small cell carcinoma
TCTN1_c.1102C>T_p.Q368*	TCTN1_c.1102C>T_p.Q368*_2	TTCAGGTAAGGTTGATCAA	Hepatocellular carcinoma
TCTN1_c.1102C>T_p.Q368*	TCTN1_c.1102C>T_p.Q368*_6	TTTCTTCAGGTAAGGTTGA	Hepatocellular carcinoma
TCTN1_c.1102C>T_p.Q368*	TCTN1_c.1102C>T_p.Q368*_3	CTTCAGGTAAGGTTGATCA	Hepatocellular carcinoma
TCTN1_c.1102C>T_p.Q368*	TCTN1_c.1102C>T_p.Q368*_4	TCTTCAGGTAAGGTTGATC	Hepatocellular carcinoma
TCTN1_c.1102C>T_p.Q368*	TCTN1_c.1102C>T_p.Q368*_5	TTCTTCAGGTAAGGTTGAT	Hepatocellular carcinoma
CCDC63_c.416C>T_p.A139V	CCDC63_c.416C>T_p.A139V_6	TTTTCGCAAAAATGCAGGA	BRCA_HER-positive carcinoma
CCDC63_c.416C>T_p.A139V	CCDC63_c.416C>T_p.A139V_5	TTTCGCAAAAATGCAGGAG	BRCA_HER-positive carcinoma
CCDC63_c.416C>T_p.A139V	CCDC63_c.416C>T_p.A139V_2	CGCAAAAATGCAGGAGGCC	BRCA_HER-positive carcinoma
CCDC63_c.416C>T_p.A139V	CCDC63_c.416C>T_p.A139V_3	TCGCAAAAATGCAGGAGGC	BRCA_HER-positive carcinoma
CCDC63_c.416C>T_p.A139V	CCDC63_c.416C>T_p.A139V_4	TTCGCAAAAATGCAGGAGG	BRCA_HER-positive carcinoma
SH2B3_c.311C>T_p.P104L	SH2B3_c.311C>T_p.P104L_2	CCCGGAGCCAGGCCCCGGC	Hepatocellular carcinoma
SH2B3_c.311C>T_p.P104L	SH2B3_c.311C>T_p.P104L_3	CCCCGGAGCCAGGCCCCGG	Hepatocellular carcinoma
SH2B3_c.311C>T_p.P104L	SH2B3_c.311C>T_p.P104L_4	TCCCCGGAGCCAGGCCCCG	Hepatocellular carcinoma
SH2B3_c.311C>T_p.P104L	SH2B3_c.311C>T_p.P104L_5	GTCCCCGGAGCCAGGCCCC	Hepatocellular carcinoma
SH2B3_c.311C>T_p.P104L	SH2B3_c.311C>T_p.P104L_6	CGTCCCCGGAGCCAGGCCC	Hepatocellular carcinoma
PRB3_c.410G>A_p.R137H	PRB3_c.410G>A_p.R137H_2	GACGAGGCGGGGGACCTTG	Non small cell carcinoma
PRB3_c.410G>A_p.R137H	PRB3_c.410G>A_p.R137H_3	GGACGAGGCGGGGGACCTT	Non small cell carcinoma
PRB3_c.410G>A_p.R137H	PRB3_c.410G>A_p.R137H_4	CGGACGAGGCGGGGGACCT	Non small cell carcinoma
PRB3_c.410G>A_p.R137H	PRB3_c.410G>A_p.R137H_5	CCGGACGAGGCGGGGGACC	Non small cell carcinoma
PRB3_c.410G>A_p.R137H	PRB3_c.410G>A_p.R137H_6	CCCGGACGAGGCGGGGGAC	Non small cell carcinoma
MED13L_c.5456C>T_p.A1819V	MED13L_c.5456C>T_p.A1819V_4	GAGGCGAGCCAGAAATACA	BRCA_HER-positive carcinoma
MED13L_c.5456C>T_p.A1819V	MED13L_c.5456C>T_p.A1819V_5	TGAGGCGAGCCAGAAATAC	BRCA_HER-positive carcinoma
MED13L_c.5456C>T_p.A1819V	MED13L_c.5456C>T_p.A1819V_2	GGCGAGCCAGAAATACAAT	BRCA_HER-positive carcinoma
MED13L_c.5456C>T_p.A1819V	MED13L_c.5456C>T_p.A1819V_3	AGGCGAGCCAGAAATACAA	BRCA_HER-positive carcinoma
MED13L_c.5456C>T_p.A1819V	MED13L_c.5456C>T_p.A1819V_6	GTGAGGCGAGCCAGAAATA	BRCA_HER-positive carcinoma
SRSF9_c.421G>A_p.D141N	SRSF9_c.421G>A_p.D141N_4	ACATCAGCATAACAGACAT	BRCA_HER-positive carcinoma
SRSF9_c.421G>A_p.D141N	SRSF9_c.421G>A_p.D141N_2	ATCAGCATAACAGACATCC	BRCA_HER-positive carcinoma
SRSF9_c.421G>A_p.D141N	SRSF9_c.421G>A_p.D141N_3	CATCAGCATAACAGACATC	BRCA_HER-positive carcinoma
SRSF9_c.421G>A_p.D141N	SRSF9_c.421G>A_p.D141N_5	CACATCAGCATAACAGACA	BRCA_HER-positive carcinoma
SRSF9_c.421G>A_p.D141N	SRSF9_c.421G>A_p.D141N_6	GCACATCAGCATAACAGAC	BRCA_HER-positive carcinoma
P2RX7_c.259G>A_p.V87I	P2RX7_c.259G>A_p.V87I_3	AGACACTGTGCACCAACTT	Hepatocellular carcinoma
P2RX7_c.259G>A_p.V87I	P2RX7_c.259G>A_p.V87I_2	GACACTGTGCACCAACTTC	Hepatocellular carcinoma
P2RX7_c.259G>A_p.V87I	P2RX7_c.259G>A_p.V87I_6	CAAAGACACTGTGCACCAA	Hepatocellular carcinoma
P2RX7_c.259G>A_p.V87I	P2RX7_c.259G>A_p.V87I_4	AAGACACTGTGCACCAACT	Hepatocellular carcinoma
P2RX7_c.259G>A_p.V87I	P2RX7_c.259G>A_p.V87I_5	AAAGACACTGTGCACCAAC	Hepatocellular carcinoma
CAMKK2_c.380C>T_p.P127L	CAMKK2_c.380C>T_p.P127L_3	TGCCCTACTCACCCGTCAG	Non small cell carcinoma
CAMKK2_c.380C>T_p.P127L	CAMKK2_c.380C>T_p.P127L_2	GCCCTACTCACCCGTCAGC	Non small cell carcinoma
CAMKK2_c.380C>T_p.P127L	CAMKK2_c.380C>T_p.P127L_4	CTGCCCTACTCACCCGTCA	Non small cell carcinoma
CAMKK2_c.380C>T_p.P127L	CAMKK2_c.380C>T_p.P127L_5	CCTGCCCTACTCACCCGTC	Non small cell carcinoma
CAMKK2_c.380C>T_p.P127L	CAMKK2_c.380C>T_p.P127L_6	CCCTGCCCTACTCACCCGT	Non small cell carcinoma
CLIP1_c.3310G>A_p.E1104K	CLIP1_c.3310G>A_p.E1104K_2	CTCAGTCTTCTCTTTGGTC	BRCA_HER-positive carcinoma
CLIP1_c.3310G>A_p.E1104K	CLIP1_c.3310G>A_p.E1104K_6	GAGTCTCAGTCTTCTCTTT	BRCA_HER-positive carcinoma
CLIP1_c.3310G>A_p.E1104K	CLIP1_c.3310G>A_p.E1104K_3	TCTCAGTCTTCTCTTTGGT	BRCA_HER-positive carcinoma
CLIP1_c.3310G>A_p.E1104K	CLIP1_c.3310G>A_p.E1104K_4	GTCTCAGTCTTCTCTTTGG	BRCA_HER-positive carcinoma
CLIP1_c.3310G>A_p.E1104K	CLIP1_c.3310G>A_p.E1104K_5	AGTCTCAGTCTTCTCTTTG	BRCA_HER-positive carcinoma
HCAR3_c.568G>A_p.E190K	HCAR3_c.568G>A_p.E190K_6	TAGCTTCGTGCCACCGGAA	BRCA_HER-positive carcinoma
HCAR3_c.568G>A_p.E190K	HCAR3_c.568G>A_p.E190K_5	AGCTTCGTGCCACCGGAAG	BRCA_HER-positive carcinoma
HCAR3_c.568G>A_p.E190K	HCAR3_c.568G>A_p.E190K_2	TTCGTGCCACCGGAAGGTA	BRCA_HER-positive carcinoma
HCAR3_c.568G>A_p.E190K	HCAR3_c.568G>A_p.E190K_3	CTTCGTGCCACCGGAAGGT	BRCA_HER-positive carcinoma
HCAR3_c.568G>A_p.E190K	HCAR3_c.568G>A_p.E190K_4	GCTTCGTGCCACCGGAAGG	BRCA_HER-positive carcinoma
CCDC62_c.754G>A_p.D252N	CCDC62_c.754G>A_p.D252N_3	CATCGTGCAGGCAACTTTT	Hepatocellular carcinoma
CCDC62_c.754G>A_p.D252N	CCDC62_c.754G>A_p.D252N_4	TCATCGTGCAGGCAACTTT	Hepatocellular carcinoma
CCDC62_c.754G>A_p.D252N	CCDC62_c.754G>A_p.D252N_5	TTCATCGTGCAGGCAACTT	Hepatocellular carcinoma
CCDC62_c.754G>A_p.D252N	CCDC62_c.754G>A_p.D252N_6	ATTCATCGTGCAGGCAACT	Hepatocellular carcinoma
CCDC62_c.754G>A_p.D252N	CCDC62_c.754G>A_p.D252N_2	ATCGTGCAGGCAACTTTTC	Hepatocellular carcinoma
PITPNM2_c.3544G>A_p.V1182M	PITPNM2_c.3544G>A_p.V1182M_2	CACCAGGCCGTCACAGAAG	BRCA_HER-positive carcinoma
PITPNM2_c.3544G>A_p.V1182M	PITPNM2_c.3544G>A_p.V1182M_4	TGCACCAGGCCGTCACAGA	BRCA_HER-positive carcinoma
PITPNM2_c.3544G>A_p.V1182M	PITPNM2_c.3544G>A_p.V1182M_5	ATGCACCAGGCCGTCACAG	BRCA_HER-positive carcinoma
PITPNM2_c.3544G>A_p.V1182M	PITPNM2_c.3544G>A_p.V1182M_6	CATGCACCAGGCCGTCACA	BRCA_HER-positive carcinoma
PITPNM2_c.3544G>A_p.V1182M	PITPNM2_c.3544G>A_p.V1182M_3	GCACCAGGCCGTCACAGAA	BRCA_HER-positive carcinoma
NCOR2_c.3355G>A_p.E1119K	NCOR2_c.3355G>A_p.E1119K_5	CCTCTCGAGGACGCTGGGG	BRCA_HER-positive carcinoma
NCOR2_c.3355G>A_p.E1119K	NCOR2_c.3355G>A_p.E1119K_6	GCCTCTCGAGGACGCTGGG	BRCA_HER-positive carcinoma
NCOR2_c.3355G>A_p.E1119K	NCOR2_c.3355G>A_p.E1119K_2	CTCGAGGACGCTGGGGTGC	BRCA_HER-positive carcinoma
NCOR2_c.3355G>A_p.E1119K	NCOR2_c.3355G>A_p.E1119K_3	TCTCGAGGACGCTGGGGTG	BRCA_HER-positive carcinoma
NCOR2_c.3355G>A_p.E1119K	NCOR2_c.3355G>A_p.E1119K_4	CTCTCGAGGACGCTGGGGT	BRCA_HER-positive carcinoma
FZD10_c.1077G>A_p.W359*	FZD10_c.1077G>A_p.W359*_5	ATGGCCCAGGCTGCCAGGT	Hepatocellular carcinoma
FZD10_c.1077G>A_p.W359*	FZD10_c.1077G>A_p.W359*_2	GCCCAGGCTGCCAGGTGGA	Hepatocellular carcinoma
FZD10_c.1077G>A_p.W359*	FZD10_c.1077G>A_p.W359*_3	GGCCCAGGCTGCCAGGTGG	Hepatocellular carcinoma
FZD10_c.1077G>A_p.W359*	FZD10_c.1077G>A_p.W359*_4	TGGCCCAGGCTGCCAGGTG	Hepatocellular carcinoma
FZD10_c.1077G>A_p.W359*	FZD10_c.1077G>A_p.W359*_6	GATGGCCCAGGCTGCCAGG	Hepatocellular carcinoma
MMP17_c.1712C>T_p.P571L	MMP17_c.1712C>T_p.P571L_4	CCCCCGGGGGCCCCAGGCC	Hepatocellular carcinoma
MMP17_c.1712C>T_p.P571L	MMP17_c.1712C>T_p.P571L_2	CCCGGGGGCCCCAGGCCCA	Hepatocellular carcinoma
MMP17_c.1712C>T_p.P571L	MMP17_c.1712C>T_p.P571L_3	CCCCGGGGGCCCCAGGCCC	Hepatocellular carcinoma
MMP17_c.1712C>T_p.P571L	MMP17_c.1712C>T_p.P571L_5	TCCCCCGGGGGCCCCAGGC	Hepatocellular carcinoma
MMP17_c.1712C>T_p.P571L	MMP17_c.1712C>T_p.P571L_6	CTCCCCCGGGGGCCCCAGG	Hepatocellular carcinoma
EP400_c.6853G>A_p.A2285T	EP400_c.6853G>A_p.A2285T_3	TTGCGCGGTCAAACAGGGA	Hepatocellular carcinoma
EP400_c.6853G>A_p.A2285T	EP400_c.6853G>A_p.A2285T_4	GTTGCGCGGTCAAACAGGG	Hepatocellular carcinoma
EP400_c.6853G>A_p.A2285T	EP400_c.6853G>A_p.A2285T_2	TGCGCGGTCAAACAGGGAC	Hepatocellular carcinoma
EP400_c.6853G>A_p.A2285T	EP400_c.6853G>A_p.A2285T_5	TGTTGCGCGGTCAAACAGG	Hepatocellular carcinoma
EP400_c.6853G>A_p.A2285T	EP400_c.6853G>A_p.A2285T_6	GTGTTGCGCGGTCAAACAG	Hepatocellular carcinoma
EP400_c.8260C>T_p.Q2754*	EP400_c.8260C>T_p.Q2754*_3	TCTCAGGTGCAAGTTCCAC	BRCA_HER-positive carcinoma
EP400_c.8260C>T_p.Q2754*	EP400_c.8260C>T_p.Q2754*_2	CTCAGGTGCAAGTTCCACA	BRCA_HER-positive carcinoma
EP400_c.8260C>T_p.Q2754*	EP400_c.8260C>T_p.Q2754*_4	CTCTCAGGTGCAAGTTCCA	BRCA_HER-positive carcinoma
EP400_c.8260C>T_p.Q2754*	EP400_c.8260C>T_p.Q2754*_5	CCTCTCAGGTGCAAGTTCC	BRCA_HER-positive carcinoma
EP400_c.8260C>T_p.Q2754*	EP400_c.8260C>T_p.Q2754*_6	ACCTCTCAGGTGCAAGTTC	BRCA_HER-positive carcinoma
ANKLE2_c.2542G>A_p.D848N	ANKLE2_c.2542G>A_p.D848N_2	GTCGACGTCTGCACATTCA	BRCA_HER-positive carcinoma
ANKLE2_c.2542G>A_p.D848N	ANKLE2_c.2542G>A_p.D848N_6	GGGGGTCGACGTCTGCACA	BRCA_HER-positive carcinoma
ANKLE2_c.2542G>A_p.D848N	ANKLE2_c.2542G>A_p.D848N_3	GGTCGACGTCTGCACATTC	BRCA_HER-positive carcinoma
ANKLE2_c.2542G>A_p.D848N	ANKLE2_c.2542G>A_p.D848N_4	GGGTCGACGTCTGCACATT	BRCA_HER-positive carcinoma
ANKLE2_c.2542G>A_p.D848N	ANKLE2_c.2542G>A_p.D848N_5	GGGGTCGACGTCTGCACAT	BRCA_HER-positive carcinoma
GRIN2B_c.1852G>A_p.V618I	GRIN2B_c.1852G>A_p.V618I_3	GTACGGAGTTGTTAAACAC	BRCA_HER-positive carcinoma
GRIN2B_c.1852G>A_p.V618I	GRIN2B_c.1852G>A_p.V618I_2	TACGGAGTTGTTAAACACC	BRCA_HER-positive carcinoma
GRIN2B_c.1852G>A_p.V618I	GRIN2B_c.1852G>A_p.V618I_4	GGTACGGAGTTGTTAAACA	BRCA_HER-positive carcinoma
GRIN2B_c.1852G>A_p.V618I	GRIN2B_c.1852G>A_p.V618I_5	AGGTACGGAGTTGTTAAAC	BRCA_HER-positive carcinoma
GRIN2B_c.1852G>A_p.V618I	GRIN2B_c.1852G>A_p.V618I_6	CAGGTACGGAGTTGTTAAA	BRCA_HER-positive carcinoma
ATF7IP_c.2380C>T_p.H794Y	ATF7IP_c.2380C>T_p.H794Y_2	TGCATGTACCTGTTGCAGT	Hepatocellular carcinoma
ATF7IP_c.2380C>T_p.H794Y	ATF7IP_c.2380C>T_p.H794Y_3	TTGCATGTACCTGTTGCAG	Hepatocellular carcinoma
ATF7IP_c.2380C>T_p.H794Y	ATF7IP_c.2380C>T_p.H794Y_4	TTTGCATGTACCTGTTGCA	Hepatocellular carcinoma
ATF7IP_c.2380C>T_p.H794Y	ATF7IP_c.2380C>T_p.H794Y_5	TTTTGCATGTACCTGTTGC	Hepatocellular carcinoma
ATF7IP_c.2380C>T_p.H794Y	ATF7IP_c.2380C>T_p.H794Y_6	ATTTTGCATGTACCTGTTG	Hepatocellular carcinoma
C12orf60_c.115C>T_p.R39C	C12orf60_c.115C>T_p.R39C_5	TTAGCCGCAGTATGAATAC	BRCA_HER-positive carcinoma
C12orf60_c.115C>T_p.R39C	C12orf60_c.115C>T_p.R39C_6	TTTAGCCGCAGTATGAATA	BRCA_HER-positive carcinoma
C12orf60_c.115C>T_p.R39C	C12orf60_c.115C>T_p.R39C_2	GCCGCAGTATGAATACTCA	BRCA_HER-positive carcinoma
C12orf60_c.115C>T_p.R39C	C12orf60_c.115C>T_p.R39C_3	AGCCGCAGTATGAATACTC	BRCA_HER-positive carcinoma
C12orf60_c.115C>T_p.R39C	C12orf60_c.115C>T_p.R39C_4	TAGCCGCAGTATGAATACT	BRCA_HER-positive carcinoma
ARHGDIB_c.169C>T_p.P57S	ARHGDIB_c.169C>T_p.P57S_5	ATGGTCCTGTGGTGACAGG	BRCA_HER-positive carcinoma
ARHGDIB_c.169C>T_p.P57S	ARHGDIB_c.169C>T_p.P57S_2	GTCCTGTGGTGACAGGTAT	BRCA_HER-positive carcinoma
ARHGDIB_c.169C>T_p.P57S	ARHGDIB_c.169C>T_p.P57S_3	GGTCCTGTGGTGACAGGTA	BRCA_HER-positive carcinoma
ARHGDIB_c.169C>T_p.P57S	ARHGDIB_c.169C>T_p.P57S_4	TGGTCCTGTGGTGACAGGT	BRCA_HER-positive carcinoma
ARHGDIB_c.169C>T_p.P57S	ARHGDIB_c.169C>T_p.P57S_6	GATGGTCCTGTGGTGACAG	BRCA_HER-positive carcinoma
PLCZ1_c.1750C>T_p.R584C	PLCZ1_c.1750C>T_p.R584C_4	TCGTCGTATTCCTCTGTTT	Non small cell carcinoma
PLCZ1_c.1750C>T_p.R584C	PLCZ1_c.1750C>T_p.R584C_2	GTCGTATTCCTCTGTTTTC	Non small cell carcinoma
PLCZ1_c.1750C>T_p.R584C	PLCZ1_c.1750C>T_p.R584C_3	CGTCGTATTCCTCTGTTTT	Non small cell carcinoma
PLCZ1_c.1750C>T_p.R584C	PLCZ1_c.1750C>T_p.R584C_5	ATCGTCGTATTCCTCTGTT	Non small cell carcinoma
PLCZ1_c.1750C>T_p.R584C	PLCZ1_c.1750C>T_p.R584C_6	TATCGTCGTATTCCTCTGT	Non small cell carcinoma
PDE3A_c.1054G>A_p.E352K	PDE3A_c.1054G>A_p.E352K_3	CCTCGCCCATGACGGCGAT	BRCA_HER-positive carcinoma
PDE3A_c.1054G>A_p.E352K	PDE3A_c.1054G>A_p.E352K_4	GCCTCGCCCATGACGGCGA	BRCA_HER-positive carcinoma
PDE3A_c.1054G>A_p.E352K	PDE3A_c.1054G>A_p.E352K_2	CTCGCCCATGACGGCGATG	BRCA_HER-positive carcinoma
PDE3A_c.1054G>A_p.E352K	PDE3A_c.1054G>A_p.E352K_5	GGCCTCGCCCATGACGGCG	BRCA_HER-positive carcinoma
PDE3A_c.1054G>A_p.E352K	PDE3A_c.1054G>A_p.E352K_6	GGGCCTCGCCCATGACGGC	BRCA_HER-positive carcinoma
SLCO1B7_c.109G>A_p.V37I	SLCO1B7_c.109G>A_p.V37I_3	TTACAAATACAATCACAAA	BRCA_HER-positive carcinoma
SLCO1B7_c.109G>A_p.V37I	SLCO1B7_c.109G>A_p.V37I_2	TACAAATACAATCACAAAC	BRCA_HER-positive carcinoma
SLCO1B7_c.109G>A_p.V37I	SLCO1B7_c.109G>A_p.V37I_4	CTTACAAATACAATCACAA	BRCA_HER-positive carcinoma
SLCO1B7_c.109G>A_p.V37I	SLCO1B7_c.109G>A_p.V37I_5	ACTTACAAATACAATCACA	BRCA_HER-positive carcinoma
SLCO1B7_c.109G>A_p.V37I	SLCO1B7_c.109G>A_p.V37I_6	AACTTACAAATACAATCAC	BRCA_HER-positive carcinoma
SLCO1B1_c.43C>T_p.P15S	SLCO1B1_c.43C>T_p.P15S_2	AACCTTCAGAGAATAAGAA	BRCA_HER-positive carcinoma
SLCO1B1_c.43C>T_p.P15S	SLCO1B1_c.43C>T_p.P15S_6	GCACAACCTTCAGAGAATA	BRCA_HER-positive carcinoma
SLCO1B1_c.43C>T_p.P15S	SLCO1B1_c.43C>T_p.P15S_3	CAACCTTCAGAGAATAAGA	BRCA_HER-positive carcinoma
SLCO1B1_c.43C>T_p.P15S	SLCO1B1_c.43C>T_p.P15S_4	ACAACCTTCAGAGAATAAG	BRCA_HER-positive carcinoma
SLCO1B1_c.43C>T_p.P15S	SLCO1B1_c.43C>T_p.P15S_5	CACAACCTTCAGAGAATAA	BRCA_HER-positive carcinoma
ABCC9_c.3529G>A_p.E1177K	ABCC9_c.3529G>A_p.E1177K_3	TTTCTGAGAAGTGACAGAG	BRCA_HER-positive carcinoma
ABCC9_c.3529G>A_p.E1177K	ABCC9_c.3529G>A_p.E1177K_2	TTCTGAGAAGTGACAGAGC	BRCA_HER-positive carcinoma
ABCC9_c.3529G>A_p.E1177K	ABCC9_c.3529G>A_p.E1177K_4	GTTTCTGAGAAGTGACAGA	BRCA_HER-positive carcinoma
ABCC9_c.3529G>A_p.E1177K	ABCC9_c.3529G>A_p.E1177K_5	TGTTTCTGAGAAGTGACAG	BRCA_HER-positive carcinoma
ABCC9_c.3529G>A_p.E1177K	ABCC9_c.3529G>A_p.E1177K_6	CTGTTTCTGAGAAGTGACA	BRCA_HER-positive carcinoma
KRAS_c.437C>T_p.A146V	KRAS_c.437C>T_p.A146V_2	AGCAAAGACAAGACAGGTA	CRC_Adenocarcinoma
KRAS_c.437C>T_p.A146V	KRAS_c.437C>T_p.A146V_3	CAGCAAAGACAAGACAGGT	CRC_Adenocarcinoma
KRAS_c.437C>T_p.A146V	KRAS_c.437C>T_p.A146V_4	TCAGCAAAGACAAGACAGG	CRC_Adenocarcinoma
KRAS_c.437C>T_p.A146V	KRAS_c.437C>T_p.A146V_5	ATCAGCAAAGACAAGACAG	CRC_Adenocarcinoma
KRAS_c.437C>T_p.A146V	KRAS_c.437C>T_p.A146V_6	CATCAGCAAAGACAAGACA	CRC_Adenocarcinoma
KRAS_c.436G>A_p.A146T	KRAS_c.436G>A_p.A146T_5	CTTTGCTGATGTTTCAATA	CRC_Adenocarcinoma
KRAS_c.436G>A_p.A146T	KRAS_c.436G>A_p.A146T_6	TCTTTGCTGATGTTTCAAT	CRC_Adenocarcinoma
KRAS_c.436G>A_p.A146T	KRAS_c.436G>A_p.A146T_2	TGCTGATGTTTCAATAAAA	CRC_Adenocarcinoma
KRAS_c.436G>A_p.A146T	KRAS_c.436G>A_p.A146T_3	TTGCTGATGTTTCAATAAA	CRC_Adenocarcinoma
KRAS_c.436G>A_p.A146T	KRAS_c.436G>A_p.A146T_4	TTTGCTGATGTTTCAATAA	CRC_Adenocarcinoma
KRAS_c.194G>A_p.S65N	KRAS_c.194G>A_p.S65N_5	TTGCACTGTACTCCTCTTG	Non small cell carcinoma
KRAS_c.194G>A_p.S65N	KRAS_c.194G>A_p.S65N_2	CACTGTACTCCTCTTGACC	Non small cell carcinoma
KRAS_c.194G>A_p.S65N	KRAS_c.194G>A_p.S65N_3	GCACTGTACTCCTCTTGAC	Non small cell carcinoma
KRAS_c.194G>A_p.S65N	KRAS_c.194G>A_p.S65N_4	TGCACTGTACTCCTCTTGA	Non small cell carcinoma
KRAS_c.194G>A_p.S65N	KRAS_c.194G>A_p.S65N_6	ATTGCACTGTACTCCTCTT	Non small cell carcinoma
KRAS_c.175G>A_p.A59T	KRAS_c.175G>A_p.A59T_4	CCTGCTGTGTCGAGAATAT	CRC_Adenocarcinoma
KRAS_c.175G>A_p.A59T	KRAS_c.175G>A_p.A59T_2	TGCTGTGTCGAGAATATCC	CRC_Adenocarcinoma
KRAS_c.175G>A_p.A59T	KRAS_c.175G>A_p.A59T_3	CTGCTGTGTCGAGAATATC	CRC_Adenocarcinoma
KRAS_c.175G>A_p.A59T	KRAS_c.175G>A_p.A59T_5	ACCTGCTGTGTCGAGAATA	CRC_Adenocarcinoma
KRAS_c.175G>A_p.A59T	KRAS_c.175G>A_p.A59T_6	GACCTGCTGTGTCGAGAAT	CRC_Adenocarcinoma
KRAS_c.38G>A_p.G13D	KRAS_c.38G>A_p.G13D_3	ACGCCACCAGCTCCAACTA	CRC_Adenocarcinoma, Non small cell carcinoma, Hepatocellular carcinoma, BRCA_Basal (triple-negative) carcinoma
KRAS_c.38G>A_p.G13D	KRAS_c.38G>A_p.G13D_4	TACGCCACCAGCTCCAACT	CRC_Adenocarcinoma, Non small cell carcinoma, Hepatocellular carcinoma, BRCA_Basal (triple-negative) carcinoma
KRAS_c.38G>A_p.G13D	KRAS_c.38G>A_p.G13D_2	CGCCACCAGCTCCAACTAC	CRC_Adenocarcinoma, Non small cell carcinoma, Hepatocellular carcinoma, BRCA_Basal (triple-negative) carcinoma
KRAS_c.38G>A_p.G13D	KRAS_c.38G>A_p.G13D_5	CTACGCCACCAGCTCCAAC	CRC_Adenocarcinoma, Non small cell carcinoma, Hepatocellular carcinoma, BRCA_Basal (triple-negative) carcinoma
KRAS_c.38G>A_p.G13D	KRAS_c.38G>A_p.G13D_6	CCTACGCCACCAGCTCCAA	CRC_Adenocarcinoma, Non small cell carcinoma, Hepatocellular carcinoma, BRCA_Basal (triple-negative) carcinoma
KRAS_c.35G>A_p.G12D	KRAS_c.35G>A_p.G12D_3	CCACCAGCTCCAACTACCA	CRC_Adenocarcinoma, Non small cell carcinoma, Hepatocellular carcinoma, Combined hepatocellular-cholangiocarcinoma
KRAS_c.35G>A_p.G12D	KRAS_c.35G>A_p.G12D_2	CACCAGCTCCAACTACCAC	CRC_Adenocarcinoma, Non small cell carcinoma, Hepatocellular carcinoma, Combined hepatocellular-cholangiocarcinoma
KRAS_c.35G>A_p.G12D	KRAS_c.35G>A_p.G12D_4	GCCACCAGCTCCAACTACC	CRC_Adenocarcinoma, Non small cell carcinoma, Hepatocellular carcinoma, Combined hepatocellular-cholangiocarcinoma
KRAS_c.35G>A_p.G12D	KRAS_c.35G>A_p.G12D_5	CGCCACCAGCTCCAACTAC	CRC_Adenocarcinoma, Non small cell carcinoma, Hepatocellular carcinoma, Combined hepatocellular-cholangiocarcinoma
KRAS_c.35G>A_p.G12D	KRAS_c.35G>A_p.G12D_6	ACGCCACCAGCTCCAACTA	CRC_Adenocarcinoma, Non small cell carcinoma, Hepatocellular carcinoma, Combined hepatocellular-cholangiocarcinoma
KRAS_c.34G>A_p.G12S	KRAS_c.34G>A_p.G12S_2	ACCAGCTCCAACTACCACA	CRC_Adenocarcinoma, Non small cell carcinoma
KRAS_c.34G>A_p.G12S	KRAS_c.34G>A_p.G12S_6	CGCCACCAGCTCCAACTAC	CRC_Adenocarcinoma, Non small cell carcinoma
KRAS_c.34G>A_p.G12S	KRAS_c.34G>A_p.G12S_3	CACCAGCTCCAACTACCAC	CRC_Adenocarcinoma, Non small cell carcinoma
KRAS_c.34G>A_p.G12S	KRAS_c.34G>A_p.G12S_4	CCACCAGCTCCAACTACCA	CRC_Adenocarcinoma, Non small cell carcinoma
KRAS_c.34G>A_p.G12S	KRAS_c.34G>A_p.G12S_5	GCCACCAGCTCCAACTACC	CRC_Adenocarcinoma, Non small cell carcinoma
CACNA1C_c.1519C>T_p.R507C	CACNA1C_c.1519C>T_p.R507C_5	ACTGGCGCCGGTGGAATCG	BRCA_HER-positive carcinoma
CACNA1C_c.1519C>T_p.R507C	CACNA1C_c.1519C>T_p.R507C_4	CTGGCGCCGGTGGAATCGG	BRCA_HER-positive carcinoma
CACNA1C_c.1519C>T_p.R507C	CACNA1C_c.1519C>T_p.R507C_6	TACTGGCGCCGGTGGAATC	BRCA_HER-positive carcinoma
CACNA1C_c.1519C>T_p.R507C	CACNA1C_c.1519C>T_p.R507C_3	TGGCGCCGGTGGAATCGGT	BRCA_HER-positive carcinoma
CACNA1C_c.1519C>T_p.R507C	CACNA1C_c.1519C>T_p.R507C_2	GGCGCCGGTGGAATCGGTT	BRCA_HER-positive carcinoma
DDX11_c.196G>A_p.E66K	DDX11_c.196G>A_p.E66K_3	GTTCAAAGTCACGGAGCCA	BRCA_HER-positive carcinoma
DDX11_c.196G>A_p.E66K	DDX11_c.196G>A_p.E66K_4	TGTTCAAAGTCACGGAGCC	BRCA_HER-positive carcinoma
DDX11_c.196G>A_p.E66K	DDX11_c.196G>A_p.E66K_2	TTCAAAGTCACGGAGCCAA	BRCA_HER-positive carcinoma
DDX11_c.196G>A_p.E66K	DDX11_c.196G>A_p.E66K_5	CTGTTCAAAGTCACGGAGC	BRCA_HER-positive carcinoma
DDX11_c.196G>A_p.E66K	DDX11_c.196G>A_p.E66K_6	TCTGTTCAAAGTCACGGAG	BRCA_HER-positive carcinoma
PARP11_c.557C>T_p.A186V	PARP11_c.557C>T_p.A186V_2	GGCTCAGCTCAAGAAAAAA	BRCA_HER-positive carcinoma
PARP11_c.557C>T_p.A186V	PARP11_c.557C>T_p.A186V_3	AGGCTCAGCTCAAGAAAAA	BRCA_HER-positive carcinoma
PARP11_c.557C>T_p.A186V	PARP11_c.557C>T_p.A186V_6	AAAAGGCTCAGCTCAAGAA	BRCA_HER-positive carcinoma
PARP11_c.557C>T_p.A186V	PARP11_c.557C>T_p.A186V_4	AAGGCTCAGCTCAAGAAAA	BRCA_HER-positive carcinoma
PARP11_c.557C>T_p.A186V	PARP11_c.557C>T_p.A186V_5	AAAGGCTCAGCTCAAGAAA	BRCA_HER-positive carcinoma
CNTN1_c.1393G>A_p.E465K	CNTN1_c.1393G>A_p.E465K_2	TTCCCAAATGAGTATTCTA	BRCA_HER-positive carcinoma
CNTN1_c.1393G>A_p.E465K	CNTN1_c.1393G>A_p.E465K_3	CTTCCCAAATGAGTATTCT	BRCA_HER-positive carcinoma
CNTN1_c.1393G>A_p.E465K	CNTN1_c.1393G>A_p.E465K_6	CATCTTCCCAAATGAGTAT	BRCA_HER-positive carcinoma
CNTN1_c.1393G>A_p.E465K	CNTN1_c.1393G>A_p.E465K_4	TCTTCCCAAATGAGTATTC	BRCA_HER-positive carcinoma
CNTN1_c.1393G>A_p.E465K	CNTN1_c.1393G>A_p.E465K_5	ATCTTCCCAAATGAGTATT	BRCA_HER-positive carcinoma
ADAMTS20_c.190C>T_p.Q64*	ADAMTS20_c.190C>T_p.Q64*_2	GGCAGAAACGCAGCTCCGA	Hepatocellular carcinoma
ADAMTS20_c.190C>T_p.Q64*	ADAMTS20_c.190C>T_p.Q64*_5	GCCGGCAGAAACGCAGCTC	Hepatocellular carcinoma
ADAMTS20_c.190C>T_p.Q64*	ADAMTS20_c.190C>T_p.Q64*_6	AGCCGGCAGAAACGCAGCT	Hepatocellular carcinoma
ADAMTS20_c.190C>T_p.Q64*	ADAMTS20_c.190C>T_p.Q64*_3	CGGCAGAAACGCAGCTCCG	Hepatocellular carcinoma
ADAMTS20_c.190C>T_p.Q64*	ADAMTS20_c.190C>T_p.Q64*_4	CCGGCAGAAACGCAGCTCC	Hepatocellular carcinoma
TMEM117_c.656C>T_p.T219M	TMEM117_c.656C>T_p.T219M_4	ACAACGGACTGGATCAGCT	BRCA_HER-positive carcinoma
TMEM117_c.656C>T_p.T219M	TMEM117_c.656C>T_p.T219M_5	TACAACGGACTGGATCAGC	BRCA_HER-positive carcinoma
TMEM117_c.656C>T_p.T219M	TMEM117_c.656C>T_p.T219M_6	TTACAACGGACTGGATCAG	BRCA_HER-positive carcinoma
TMEM117_c.656C>T_p.T219M	TMEM117_c.656C>T_p.T219M_2	AACGGACTGGATCAGCTGG	BRCA_HER-positive carcinoma
TMEM117_c.656C>T_p.T219M	TMEM117_c.656C>T_p.T219M_3	CAACGGACTGGATCAGCTG	BRCA_HER-positive carcinoma
ARID2_c.3500C>T_p.T1167I	ARID2_c.3500C>T_p.T1167I_4	GGGACTTCTGGCAACCAGG	BRCA_HER-positive carcinoma
ARID2_c.3500C>T_p.T1167I	ARID2_c.3500C>T_p.T1167I_5	AGGGACTTCTGGCAACCAG	BRCA_HER-positive carcinoma
ARID2_c.3500C>T_p.T1167I	ARID2_c.3500C>T_p.T1167I_2	GACTTCTGGCAACCAGGTA	BRCA_HER-positive carcinoma
ARID2_c.3500C>T_p.T1167I	ARID2_c.3500C>T_p.T1167I_3	GGACTTCTGGCAACCAGGT	BRCA_HER-positive carcinoma
ARID2_c.3500C>T_p.T1167I	ARID2_c.3500C>T_p.T1167I_6	AAGGGACTTCTGGCAACCA	BRCA_HER-positive carcinoma
H1FNT_c.650G>A_p.R217Q	H1FNT_c.650G>A_p.R217Q_3	CCTCGCCCCTCGTCTGCCG	BRCA_HER-positive carcinoma
H1FNT_c.650G>A_p.R217Q	H1FNT_c.650G>A_p.R217Q_4	TCCTCGCCCCTCGTCTGCC	BRCA_HER-positive carcinoma
H1FNT_c.650G>A_p.R217Q	H1FNT_c.650G>A_p.R217Q_2	CTCGCCCCTCGTCTGCCGC	BRCA_HER-positive carcinoma
H1FNT_c.650G>A_p.R217Q	H1FNT_c.650G>A_p.R217Q_6	TGTCCTCGCCCCTCGTCTG	BRCA_HER-positive carcinoma
H1FNT_c.650G>A_p.R217Q	H1FNT_c.650G>A_p.R217Q_5	GTCCTCGCCCCTCGTCTGC	BRCA_HER-positive carcinoma
OR8S1_c.1031G>A_p.G344E	OR8S1_c.1031G>A_p.G344E_4	GGCCCCTTGGGGTTGAGGC	Non small cell carcinoma
OR8S1_c.1031G>A_p.G344E	OR8S1_c.1031G>A_p.G344E_5	AGGCCCCTTGGGGTTGAGG	Non small cell carcinoma
OR8S1_c.1031G>A_p.G344E	OR8S1_c.1031G>A_p.G344E_3	GCCCCTTGGGGTTGAGGCG	Non small cell carcinoma
OR8S1_c.1031G>A_p.G344E	OR8S1_c.1031G>A_p.G344E_2	CCCCTTGGGGTTGAGGCGT	Non small cell carcinoma
OR8S1_c.1031G>A_p.G344E	OR8S1_c.1031G>A_p.G344E_6	CAGGCCCCTTGGGGTTGAG	Non small cell carcinoma
ADCY6_c.3194G>A_p.R1065Q	ADCY6_c.3194G>A_p.R1065Q_4	GAGCCGCATGGCGTAGTCA	BRCA_HER-positive carcinoma
ADCY6_c.3194G>A_p.R1065Q	ADCY6_c.3194G>A_p.R1065Q_2	GCCGCATGGCGTAGTCAGC	BRCA_HER-positive carcinoma
ADCY6_c.3194G>A_p.R1065Q	ADCY6_c.3194G>A_p.R1065Q_3	AGCCGCATGGCGTAGTCAG	BRCA_HER-positive carcinoma
ADCY6_c.3194G>A_p.R1065Q	ADCY6_c.3194G>A_p.R1065Q_5	TGAGCCGCATGGCGTAGTC	BRCA_HER-positive carcinoma
ADCY6_c.3194G>A_p.R1065Q	ADCY6_c.3194G>A_p.R1065Q_6	ATGAGCCGCATGGCGTAGT	BRCA_HER-positive carcinoma
ADCY6_c.320C>T_p.A107V	ADCY6_c.320C>T_p.A107V_3	TGGCGCCCGACGCGGTGCC	BRCA_HER-positive carcinoma
ADCY6_c.320C>T_p.A107V	ADCY6_c.320C>T_p.A107V_2	GGCGCCCGACGCGGTGCCC	BRCA_HER-positive carcinoma
ADCY6_c.320C>T_p.A107V	ADCY6_c.320C>T_p.A107V_6	AGGTGGCGCCCGACGCGGT	BRCA_HER-positive carcinoma
ADCY6_c.320C>T_p.A107V	ADCY6_c.320C>T_p.A107V_4	GTGGCGCCCGACGCGGTGC	BRCA_HER-positive carcinoma
ADCY6_c.320C>T_p.A107V	ADCY6_c.320C>T_p.A107V_5	GGTGGCGCCCGACGCGGTG	BRCA_HER-positive carcinoma
ADCY6_c.283G>A_p.E95K	ADCY6_c.283G>A_p.E95K_2	CTCGGTATCCTCGAAGCCC	BRCA_HER-positive carcinoma
ADCY6_c.283G>A_p.E95K	ADCY6_c.283G>A_p.E95K_3	CCTCGGTATCCTCGAAGCC	BRCA_HER-positive carcinoma
ADCY6_c.283G>A_p.E95K	ADCY6_c.283G>A_p.E95K_6	TCACCTCGGTATCCTCGAA	BRCA_HER-positive carcinoma
ADCY6_c.283G>A_p.E95K	ADCY6_c.283G>A_p.E95K_4	ACCTCGGTATCCTCGAAGC	BRCA_HER-positive carcinoma
ADCY6_c.283G>A_p.E95K	ADCY6_c.283G>A_p.E95K_5	CACCTCGGTATCCTCGAAG	BRCA_HER-positive carcinoma
KMT2D_c.15290G>A_p.R5097Q	KMT2D_c.15290G>A_p.R5097Q_2	TTCGCTGGCACAGGGAGCA	BRCA_HER-positive carcinoma
KMT2D_c.15290G>A_p.R5097Q	KMT2D_c.15290G>A_p.R5097Q_5	CAGTTCGCTGGCACAGGGA	BRCA_HER-positive carcinoma
KMT2D_c.15290G>A_p.R5097Q	KMT2D_c.15290G>A_p.R5097Q_6	CCAGTTCGCTGGCACAGGG	BRCA_HER-positive carcinoma
KMT2D_c.15290G>A_p.R5097Q	KMT2D_c.15290G>A_p.R5097Q_3	GTTCGCTGGCACAGGGAGC	BRCA_HER-positive carcinoma
[truncated: 7,224 more rows]

## Sheet: Z-score in ABE screens
SNVs	ABE_DMSO_R1	ABE_DMSO_R2	ABE_LVT_R1	ABE_LVT_R2	ABE_SRF_R1	ABE_SRF_R2	ABE_RRF_R1	ABE_RRF_R2
SF3B1_c.2098A>G_p.K700E	-1.04203	-0.619993	-0.20969	-0.237778	-0.16675	-1.33245	-0.139495	-0.0470721
ARNT_c.106A>G_p.I36V	0.617666	0.26505	-0.115412	-0.3031	0.792221	1.35036	0.474722	0.429876
C22orf42_c.422T>C_p.V141A	0.49569	0.178918	0.0202491	1.19541	0.0661848	0.26798	0.410017	0.197656
KRT71_c.739A>G_p.N247D	-0.152983	-0.0623171	0.28743	-1.1063	0.0975662	0.314599	0.0324576	-0.291268
UGT2B11_c.1442A>G_p.H481R	-0.273194	-1.01718	-0.498988	-1.10973	0.448109	-0.508508	-0.358164	-0.63084
RLIM_c.1411T>C_p.S471P	1.13522	0.56802	0.360576	-0.278453	0.270139	-0.36668	0.832641	1.12316
TP53_c.740A>G_p.N247S	0.497096	0.0500183	0.570509	0.398399	0.924866	-0.0110547	0.47705	0.670729
controlSplicing_xcas9_1_AG_Before_Exon_PTPMT1	-1.81513	0.151973	-0.603334	-0.206226	-0.345957	0.533893	-1.74558	-0.173324
REPS1_c.1736A>G_p.D579G	-0.209325	-0.301283	-0.0268358	0.344683	1.2361	-0.0151594	0.717316	0.470458
PCDHGA11_c.352T>C_p.Y118H	-0.409536	0.175061	-0.311282	-0.223059	0.282613	-0.534919	-0.050855	-0.150266
ZNF430_c.1198T>C_p.F400L	0.182762	-0.388218	-0.0110523	0.27271	-0.236699	0.821607	0.0556687	0.157588
MAP2K6_c.334A>G_p.T112A	1.37114	1.24557	0.786049	0.603912	1.09415	0.751708	0.602169	0.288076
AAVS1_497	-0.810581	-1.92946	0.6855	-0.182206	-0.58662	-1.6901	0.928649	2.04987
OR52M1_c.353T>C_p.L118P	-0.408036	-0.215764	0.169085	0.0532891	-0.486559	-0.551358	0.286381	0.380926
AAVS1_405	-1.43636	-0.759128	-0.806837	-0.927932	-1.73324	-1.30787	-1.47066	-1.29926
AAVS1_476	0.287701	-0.872465	-1.24643	-0.906824	-0.37932	-0.314874	0.723633	-0.637807
JAK2_c.497T>C_p.I166T	0.220464	0.196361	0.407914	0.566648	1.06415	0.321064	0.771538	0.859925
MMP19_c.764A>G_p.Y255C	0.0429243	-0.64377	-0.680176	0.527	0.510506	-0.806051	-0.22796	-0.493634
TP53_c.467T>C_p.I156T	0.199465	-0.218476	0.0845351	-0.91997	-0.174038	0.40543	-0.475994	-0.568136
FAM214A_c.2707A>G_p.I903V	0.26936	-0.0257167	0.583521	0.330959	0.115068	0.283809	0.942891	-0.399008
ADGRF4_c.1154T>C_p.M385T	-1.01616	-0.198953	0.0903068	0.374072	0.486822	0.177264	0.287185	-0.198475
CSMD1_c.8177A>G_p.Q2726R	-0.0673037	-0.352407	0.72794	-0.228624	1.52077	0.198414	0.00438917	-0.119887
PABPC3_c.1115A>G_p.E372G	1.31484	0.35508	0.582736	0.181312	1.40092	-0.0563588	0.363616	4.93079e-05
PCDHGB1_c.2060A>G_p.Y687C	0.204608	0.750218	0.135278	0.0400322	0.579114	0.781193	-0.380237	-0.587136
CHST1_c.1172A>G_p.E391G	-0.835982	-0.00882081	0.348679	-0.136662	0.425285	-0.344588	0.729073	-0.255164
SGIP1_c.998A>G_p.D333G	0.438639	-0.397299	0.166642	0.0509547	1.14701	0.582657	0.224683	0.631494
AAVS1_67	0.0277596	-0.412958	0.469669	1.22822	-0.209011	-1.51937	-0.507694	-1.28345
RGS20_c.910A>G_p.K304E	0.219745	0.400101	-0.73845	0.0875802	-0.834274	0.980859	-0.511589	-0.826073
RDH13_c.766A>G_p.I256V	1.03199	1.02579	1.37615	0.56279	0.256877	0.641713	0.342942	0.967209
PALB2_c.1676A>G_p.Q559R	-0.289634	-0.0701371	-0.312649	-1.06657	0.00679101	0.13845	0.00807706	-0.705772
TP53_c.773A>G_p.E258G	-0.189732	-0.369157	0.0319443	0.725571	-0.517287	-0.331803	0.251945	-0.561307
AAVS1_360	-0.66714	-0.6851	1.8808	-0.369826	0.689875	-1.67343	-1.01203	0.81314
LDB2_c.254T>C_p.I85T	0.17203	0.798864	-0.480116	-0.232757	-0.297244	0.0964179	0.367186	-0.225783
KRAS_c.182A>G_p.Q61R	-0.157776	-0.00946611	2.73275	3.34883	-0.967725	0.205297	0.33037	0.70204
XIRP2_c.5228T>C_p.V1743A	0.883769	-0.15144	-0.15137	0.0967826	0.206994	1.0941	-0.080214	0.848503
controlSplicing_xcas9_1_AG_Before_Exon_DDX59	0.399553	-0.848367	-0.0199883	-0.291649	0.888358	-2.45229	-2.84443	-0.476258
ADGRE3_c.746T>C_p.I249T	0.732831	0.869876	0.11047	1.98628	0.473971	-0.447074	0.359627	1.1689
DAPK1_c.3554T>C_p.V1185A	0.875427	0.99961	0.817325	0.625511	0.393885	0.339966	0.872965	0.48356
MYH1_c.1871T>C_p.F624S	-1.34526	-0.528188	0.325769	-0.695204	0.0173907	-1.53664	-0.145239	-1.13918
CTNNB1_c.107A>G_p.H36R	0.0130462	-0.140212	-0.27088	0.145301	-0.0259913	-0.363085	-1.00054	0.231937
KIAA0040_c.217A>G_p.K73E	-0.674576	-0.807325	0.447228	0.393792	-1.48645	-0.386713	-0.360753	-0.574437
ZFPM2_c.250T>C_p.S84P	-0.185736	0.122551	0.149707	0.0710919	0.10301	0.608489	0.50236	0.348477
PLBD1_c.1109A>G_p.D370G	-0.080023	0.153504	-0.265935	-0.41176	0.165453	-0.0398488	0.405799	-0.368378
TET1_c.3316A>G_p.S1106G	0.0378585	0.403662	1.27097	0.880698	-0.101704	-0.598121	0.207925	0.456343
ARFGEF3_c.1784A>G_p.N595S	1.29019	0.0518377	-0.613979	0.15325	0.490075	-0.0840474	0.216403	-0.638418
[truncated: 1,125 more rows]

## Sheet: Z-score in CBE screens
SNVs	CBE_DMSO_R1	CBE_DMSO_R2	CBE_LVT_R1	CBE_LVT_R2	CBE_SRF_R1	CBE_SRF_R2	CBE_RRF_R1	CBE_RRF_R2
[truncated: 2,342 more rows]

[truncated: 3 more sheets: Driver SNVs, TKI resistance SNVs, TKI sensitizer SNVs]
