# Supplementary material
Source: Research Square preprint supplement (doi:10.21203/rs.3.rs-8651907/v1)
Supplement: Supplementary file 3 [file 86717250c2e0c5863e0c8269.docx]

### Supplementary Table 1 | Clinicopathologic characteristics of patients in the cohort.

| **Characteristic** | **TKI-sensitive**  **(n=29)** | **TKI-resistant**  **(n=36)** | **Significance**  **(*p* value)** |
| --- | --- | --- | --- |
| Age at initial diagnosis, median (range) | 63 (39 – 79) | 59 (36 – 74) | 0.1351 |
| Sex, n (%) |  |  | 1 |
| • Male | 27 (93.1) | 33 (91.7) |  |
| • Female | 2 (6.9) | 3 (8.3) |  |
| PFS, median (range) | 11 (6 – 44) | 2.5 (1 - 5) | 4.63E-12 |
| BCLC, n (%) |  |  | 0.4611 |
| • B | 7 (24.1) | 5 (13.9) |  |
| • C | 22 (75.9) | 31 (86.1) |  |
| ECOG, n (%) |  |  | 0.08109 |
| • 1 | 24 (82.8) | 35 (97.2) |  |
| • 2 | 5 (17.2) | 1 (2.8) |  |
| Child-pugh, n (%) |  |  | 0.005751 |
| • B | 23 (79.3) | 36 (100) |  |
| • C | 6 (20.7) | 0 (0.0) |  |
| Epidemiology, n (%) |  |  | 0.9371852 |
| • HBV | 26 (89.7) | 32 (88.9) |  |
| • HCV | 1 (3.4) | 1 (2.8) |  |
| • HBV+HCV | 0 (0.0) | 1 (2.8) |  |
| • None | 1 (3.4) | 2 (5.6) |  |
| • Unknown | 1 (3.4) | 0 (0.0) |  |
| Maximal tumor size (cm), median (range) |  |  |  |
| • After the intervention, cannot be measured (n = 7) |  |  |  |
| • Median (range) (n = 58) | 5.4 (0.9 – 13.4) | 5.19 (0.9 – 15.57) | 0.8464 |
| Tumor number, n (%) |  |  | 1 |
| • Single | 3 (10.3) | 3 (8.3) |  |
| • Multiple | 24 (82.8) | 33 (91.7) |  |
| • Unknown | 2 (6.9) | 0 (0.0) |  |
| Liver fibrosis, n (%) |  |  | 0.2221 |
| • With | 22 (75.9) | 21 (58.3) |  |
| • Without | 7 (24.1) | 15 (41.7) |  |
| AFP ≥ 400 ng/mL, n (%) |  |  | 4.87E-05 |
| • ≥ 400 | 7 (24.1) | 28 (77.8) |  |
| • < 400 | 22 (75.9) | 8 (22.2) |  |
| Portal vein tumor thrombus, n (%) |  |  | 1 |
| • Yes | 9 (31.0) | 11 (30.6) |  |
| • No | 20 (69.0) | 25 (69.4) |  |
| Diabetes mellitus, n (%) |  |  | 1 |
| • With | 5 (17.2) | 7 (19.4) |  |
| • Without | 24 (82.8) | 29 (80.6) |  |

Categorical variables are presented as frequencies and percentages, while continuous variables are reported as medians and ranges. For continuous variables, the Wilcoxon rank-sum test was used to compare groups if more than 50% of values were valid and numeric. For categorical variables, the Chi-square test was applied when expected counts were ≥5; otherwise, Fisher's exact test was used. Statistical significance was set at *p* < 0.05.
