# Supplementary material
Source: Research Square preprint supplement (doi:10.21203/rs.3.rs-8651907/v1)
Supplement: Supplementary file 4 [file 91febb00733095de5fac4c33.xlsx]

## Sheet: Legend
Sheet	Legend
LVT resistance genes	log2(normalized sgRNA counts) of LVT resistance genes from in vivo screens.
SRF resistance genes	log2(normalized sgRNA counts) of SRF resistance genes from in vivo screens.
RRF resistance genes	log2(normalized sgRNA counts) of RRF resistance genes from in vivo screens.

## Sheet: LVT resistance genes
Gene	LVT_T1	LVT_T2	LVT_T3	LVT_T4	LVT_T5	LVT_T6	LVT_T7	LVT_T8	LVT_T9	LVT_T10	LVT_T11	LVT_T12	sgRNA_number	enriched_frequency
AP3D1	0	0	24.0593	13.0089	13.3371	14.7944	14.9209	25.5831	24.8906	10.3133	10.5716	11.8924	3	3
ARHGAP33	0	0	16.8961	5.33297	6.73945	15.7042	7.83517	6.06001	3.40933	4.957	2.21109	5.32628	2	2
ATXN1	3.73811	0	5.81093	17.3263	4.51576	4.43196	6.54795	3.54302	5.47171	3.59064	3.77672	16.777	2	2
BCOR	0	0	10.0294	17.1693	6.67055	7.46686	8.38065	7.62362	15.9585	6.23218	6.6296	6.83124	1	2
C5AR1	12.1634	10.2065	26.3362	12.7191	12.3674	11.5896	12.8592	15.0719	14.8063	12.8812	11.6899	18.4291	2	3
CIB3	0	1.03193	13.5635	4.46582	2.86873	3.81758	3.30522	4.0084	2.89071	2.87041	13.2741	4.01738	1	2
CLK3	0	2.37268	9.66327	9.74423	7.70191	8.15461	13.248	8.89497	9.09717	10.7685	29.7434	9.66401	2	2
CXCL17	0	0	5.06819	6.88928	4.4255	14.6046	9.08946	4.0084	3.40933	4.79853	13.1453	4.6367	1	2
CYP2J2	12.2048	10.1278	12.4085	10.7823	9.2095	10.0296	9.27469	11.7343	11.3126	10.7144	10.1651	15.2424	1	2
DDR1	2.12648	12.65	5.35966	5.21596	4.95163	15.1088	5.44782	4.28152	3.9483	4.31747	4.72311	5.5417	1	2
EDNRA	12.349	10.1305	12.7048	10.797	9.1547	10.1342	9.39381	11.8144	11.5518	10.7545	10.3984	15.3205	1	2
FLT3LG	5.16138	15.5695	7.48193	8.32408	17.3982	6.98164	10.9625	7.18216	6.84412	6.77998	14.8666	6.96258	2	2
FPR3	5.77512	9.93534	9.81151	8.85806	7.17668	10.6935	9.30908	9.82464	8.65323	19.1644	19.6541	10.4238	2	2
GLRX3	0	1.03193	18.7439	18.3103	14.4248	7.81496	15.9983	8.55869	16.1372	7.07869	11.5038	5.81828	2	3
KEAP1	27.4895	33.0901	17.2723	28.2313	17.591	27.1297	37.2899	14.6097	14.4237	28.6885	34.6945	16.6162	4	6
L3MBTL2	0	0	14.6763	5.09396	12.6879	4.15723	4.591	4.79871	3.9483	3.76824	4.11571	4.19885	1	2
LSM14A	1.08554	1.03193	4.39438	4.65028	5.09157	13.0425	7.48137	13.7774	4.55196	4.1985	4.11571	3.80976	1	2
LYAR	5.01885	0	8.44904	17.8082	12.0898	6.2431	13.5559	14.0178	1.38078	5.4434	4.826	4.08189	2	2
MATK	11.289	2.37268	5.2703	6.51971	16.8541	11.233	7.49982	5.35277	4.27149	8.99221	5.54389	16.8266	2	2
MID2	3.14652	1.03193	8.21353	7.71289	6.63515	10.4511	8.75304	10.0013	27.9419	6.02275	3.77672	8.15325	2	2
MIDN	12.9138	2.86166	1.8089	7.48238	12.6009	3.61214	9.69225	1.42064	1.38078	1.36636	2.21109	2.41715	1	2
MORC4	0	0	7.0778	5.71163	6.44259	7.51695	5.68174	7.31722	6.06391	7.4698	7.8375	28.8126	2	2
NDUFA7	1.08554	2.37268	26.3503	9.97747	4.57191	4.49144	7.61032	4.71481	4.1464	5.03937	3.70429	7.58454	2	2
NF1	0	0	7.46343	10.3426	17.6148	17.0611	11.9531	7.22791	5.68539	6.44603	6.82295	7.78032	2	2
NKG7	4.48035	13.0179	4.95629	5.32845	5.09157	12.15	4.23033	4.15141	5.30372	14.236	4.819	4.50498	1	2
OCEL1	0	0	5.26889	3.32795	3.92452	4.76549	12.0177	3.84964	3.40933	14	3.57177	5.40056	1	2
OFD1	0	0	6.04817	6.81936	5.73745	15.968	6.41074	7.31722	6.78539	13.7907	6.16724	5.98431	2	2
OR1K1	2.12648	12.1989	1.8089	4.81811	0	1.52174	21.0701	0	2.0732	2.51968	2.21109	2.90914	2	2
PATJ	0	0	9.56594	8.12041	9.41937	9.92489	9.72476	10.1913	8.41345	10.7023	20.4945	21.6485	2	2
PLXNB2	7.39937	13.7588	27.9213	14.8599	14.1077	25.35	15.4504	15.0963	24.177	11.353	12.7871	12.5267	3	4
PVALB	16.5784	17.2204	7.3553	0	1.36516	1.52174	7.39262	1.42064	8.97651	0	9.89501	1.66474	2	2
REN	12.0888	9.99236	12.1963	10.4692	9.16662	10.0244	9.02694	11.5981	11.2108	10.5781	9.9648	15.1011	1	2
RHOBTB2	0	0	7.85578	6.6553	16.675	25.9992	11.6888	17.9595	3.61219	6.11032	8.19215	6.02476	2	2
SPRR2F	0	0	6.84626	8.26054	7.58295	9.5034	11.1364	21.9578	7.02152	7.99518	6.64441	19.057	2	2
SUPT20H	3.31866	13.4642	4.39438	0	3.76643	5.46079	5.20644	2.12237	3.79001	13.9015	3.04623	2.90914	2	2
SWSAP1	0	0	2.58677	3.70662	3.76643	3.61214	12.5783	3.67122	2.0732	3.76824	13.3862	4.36002	1	2
TGFBR2	1.08554	0	19.2761	7.71289	7.34725	26.7486	12.3359	6.61761	3.45398	8.12485	5.73449	6.18448	2	2
TMEM181	0	0	3.08937	4.96067	4.4255	4.95149	12.7157	5.11024	13.8994	3.76824	4.50979	3.80976	1	2
TRIM56	0	0	9.4804	18.8361	8.3826	11.5364	9.0715	9.5708	18.6724	7.78914	12.886	7.37692	2	2
TSC1	3.14652	0	34.7881	15.0842	13.508	16.6054	16.6719	15.2749	23.3052	17.5253	18.5597	12.9369	3	3
TSC2	28.5434	6.97435	2.58677	4.00627	0	4.15723	16.6502	2.59243	11.9773	2.51968	0	2.41715	2	2
XG	0	0	11.0011	21.73	9.66405	14.8508	14.2136	13.4248	8.79152	9.3198	8.524	19.8518	2	2
ZDHHC17	0	0	19.8789	19.1141	7.74494	7.67364	9.15028	8.40925	6.78539	6.02275	5.54389	7.38928	2	2
ZNF248	0	0	7.7588	17.4966	5.82027	6.54684	15.7648	5.93171	5.47171	4.06883	7.59216	6.30144	2	2
ZNF283	13.601	10.8595	11.7344	13.4261	10.4831	11.7644	11.5262	10.485	10.8462	11.4875	22.2493	22.6743	2	3
ZNF302	5.41008	15.9584	5.67455	5.53011	4.62297	8.14102	5.25989	7.2151	15.6565	4.62485	4.819	4.50498	2	2
ZNF573	0	6.73498	5.67614	7.06736	5.13159	9.42814	14.9549	16.3497	13.6054	7.53648	16.5185	5.4745	2	2

## Sheet: SRF resistance genes
Gene	SRF_T1	SRF_T2	SRF_T3	SRF_T4	SRF_T5	SRF_T6	SRF_T7	SRF_T8	SRF_T9	SRF_T10	sgRNA_number	enriched_frequency
ADORA2A	3.33272	1.04462	1.38933	1.0235	9.58587	14.795	6.78284	4.21416	8.50309	14.8106	2	2
CAND2	5.86202	5.19083	6.54635	16.1038	2.90965	14.4669	3.27246	4.57287	12.1865	12.1783	2	2
CCDC61	13.7458	13.9756	33.1079	13.8588	0	3.83094	4.65856	1.50737	1.52622	14.8772	2	2
CFAP68	5.58571	1.04462	1.68645	1.20134	9.50906	8.12208	9.67699	19.6205	19.5465	13.9292	2	2
CTSC	10.4658	10.0053	9.54326	20.9197	2.90965	2.34227	14.0547	2.7068	3.61845	4.12053	2	2
CYP2R1	0.767679	0	0.50736	0.600671	6.90832	7.00247	8.01767	13.4465	8.11584	18.1984	1	2
DST	2.03375	2.41993	7.82673	0	5.21794	6.50477	18.2186	16.9439	8.04919	6.68571	2	2
DUSP9	7.70215	2.06643	1.81913	3.95045	4.54442	2.82914	13.7204	13.6349	3.82396	3.20118	1	2
DYNC1LI1	3.99295	13.2405	4.36398	3.38519	3.49016	3.19251	14.035	9.74695	7.77424	7.6188	2	2
EFCAB3	1.92983	1.04462	0	0	5.72971	14.3356	9.11206	8.54124	24.8494	8.79812	2	2
EVC	1.63579	0.614864	1.17909	0	3.60495	13.3306	4.32613	13.0414	4.30765	4.12053	1	2
GLRX3	6.1978	5.8145	15.3461	8.65553	12.6682	3.02224	1.45026	10.719	3.05244	8.27964	2	2
HDAC5	5.94433	15.3503	4.24259	5.66286	12.2558	1.60194	8.58459	6.63918	4.90494	2.91794	2	2
KEAP1	26.1409	14.8797	27.874	15.1419	22.4771	26.1568	19.548	18.6808	24.4346	22.2963	3	3
KRTAP22-2	3.12562	1.99018	1.63563	0.600671	15.9922	3.94421	18.1347	8.54725	6.91502	7.03848	2	2
KRTCAP3	2.17397	1.87069	1.42534	1.0235	4.07215	13.0545	14.5271	4.84014	5.8432	5.21207	1	2
MAFF	13.4272	2.77517	3.67374	2.20632	1.92291	1.60194	8.49042	3.06551	13.4337	4.25048	2	2
MYLK3	20.546	29.3894	18.18	19.9557	10.3817	10.8374	12.6532	8.88504	20.0801	13.2203	2	2
NNMT	5.11775	14.6477	5.07771	5.42543	6.75401	2.01908	13.0851	2.2283	9.15306	3.43783	2	2
OTOR	9.23112	19.0192	8.78598	8.67221	3.07809	3.72389	3.51039	5.90624	4.16371	13.7635	1	2
PPM1N	0.767679	0	0.881972	0	16.7371	7.43875	19.7069	7.8833	9.7489	6.40692	2	2
PPT1	1.26607	1.22973	0.881972	1.0235	5.79699	16.8515	7.82849	17.7662	6.7095	7.45166	2	2
PRAMEF12	0	4.47616	4.80594	14.5834	11.8836	2.34227	3.51039	3.06551	2.73138	1.40022	1	2
RAB3B	6.35433	6.24147	14.3267	4.53643	2.90965	3.19251	2.63174	13.2806	2.73138	2.56517	2	2
RFX2	6.53964	16.3233	6.17442	6.14398	2.23954	1.60194	15.2297	4.84014	3.82396	3.20118	2	2
RIBC2	8.15414	6.34418	15.9918	6.35893	7.83922	0	1.45026	6.7534	4.16371	12.7683	2	2
RRP1B	8.19223	8.53099	27.735	8.40057	0	0	0	0	0	6.33141	2	2
SIGLEC6	4.04051	3.40128	6.85341	13.441	2.49904	3.19251	14.5572	9.50236	4.30765	4.67758	2	2
SMIM23	5.85561	16.7945	5.85133	5.67505	3.49016	2.60615	4.44566	4.7442	4.00382	14.6945	2	2
SYNPO2L	7.51688	7.973	15.93	7.23172	2.87197	7.01904	4.43764	3.06551	13.4577	3.81919	2	2
TBC1D17	1.26607	1.99018	1.01472	0.600671	5.79699	15.1562	13.3913	16.7782	7.20268	7.46027	2	2
TMC4	1.26607	1.37531	0.50736	2.03511	16.8463	5.94968	7.0399	6.14878	17.3784	7.33234	2	2
TMEM174	6.83425	28.9005	8.14523	8.79163	0	0	0	0	2.25114	0	2	2
TNNT1	5.32989	17.8796	5.26546	6.0297	2.23954	0	9.09117	2.2283	13.0807	4.25048	2	2
TSC2	16.4958	6.71032	8.05259	7.59232	10.8786	3.02224	6.10882	14.4951	1.52622	16.1943	2	2
TULP2	4.15872	3.9891	4.57035	13.6706	12.4191	2.82914	1.45026	2.7068	1.52622	1.40022	1	2
YAF2	0.767679	2.41993	0.50736	2.63971	8.7876	6.55303	15.4544	17.3999	18.2476	8.593	2	2
ZFP14	5.08732	15.7101	5.15643	4.64442	12.4122	6.87814	4.1958	2.2283	2.25114	2.56517	2	2

## Sheet: RRF resistance genes
Gene	RRF_T1	RRF_T2	RRF_T3	RRF_T4	RRF_T5	RRF_T6	RRF_T7	RRF_T8	RRF_T10	RRF_T11	RRF_T12	sgRNA_number	enriched_frequency
BACH1	9.34687	1.36503	1.50429	9.96921	5.01321	13.0646	21.5788	20.3834	16.6667	10.0681	10.1256	2	3
BPI	0	0	0	5.00177	0	11.819	4.18299	2.87758	14.2842	9.37909	4.10683	1	2
C2CD5	14.4426	3.38611	8.96228	16.8776	9.82932	6.48322	6.90002	6.31705	5.21729	5.75187	6.00666	2	2
CNOT4	2.13009	6.7358	13.2426	2.56094	5.6776	6.90922	7.15852	3.3058	3.48307	4.00994	14.1806	2	2
COBLL1	11.4318	30.682	10.5089	0	13.1635	7.70023	0	0	0	0	0	2	2
COCH	2.85384	2.5179	5.57284	5.07351	17.9696	10.4826	4.91544	5.59655	4.07367	15.4621	4.46589	2	2
COX7A1	4.16086	3.92433	14.0055	1.39706	8.48686	11.9012	2.1482	0	1.70602	9.71103	2.08609	2	2
CTTN	0	0	0	18.6631	9.50428	8.39631	8.31455	8.51334	18.1356	9.29061	7.94139	2	2
CYP2W1	0	0	0	7.44229	12.7248	11.4914	18.4602	12.6323	17.7386	11.77	7.61138	2	2
DIRAS3	3.23934	13.4281	3.5875	0	4.46235	12.445	2.1482	1.18259	1.09173	2.46811	1.39121	2	2
FOLH1B	0	0	0	6.11017	5.72252	6.94242	6.80336	5.4815	16.2506	17.4765	14.1997	2	2
GARRE1	6.07747	6.45721	16.2912	0	17.9027	0	2.1482	0	0	0	0	2	2
HHIPL1	0	0	0	8.40466	0	8.98684	9.2237	16.7174	5.56631	8.11643	18.7619	2	2
JADE3	2.95511	3.58866	13.7359	5.32939	12.6707	8.03919	4.91544	15.2291	8.66937	4.73812	4.99261	2	2
KCNA7	3.68045	3.15042	13.5398	3.49038	11.9672	11.8096	1.44168	3.63558	7.88454	1.3283	3.94431	2	2
KEAP1	19.2303	8.63839	22.863	20.1484	33.7311	27.8027	31.8442	33.371	27.8056	27.0841	27.9953	4	7
KHK	0	0	0	7.27836	0	8.52402	6.93363	6.04182	16.6202	18.2614	6.19292	2	2
KIR3DL3	3.85896	15.7176	4.40636	4.24565	11.2295	8.70832	4.18299	3.3058	14.2857	5.21977	2.5531	2	2
KRTAP10-9	2.95511	3.15042	3.79264	4.57719	13.3392	12.0634	14.6705	3.4801	3.32918	6.31425	3.80569	2	2
KRTAP19-3	7.15839	7.47161	17.4561	3.43321	7.34768	10.4768	4.03978	3.90383	13.8811	5.09775	3.62771	2	2
MED12L	13.9806	3.38611	3.34827	1.39706	3.18492	1.41636	1.44168	1.18259	7.37581	2.00796	11.6627	2	2
NR2E3	9.50643	19.3886	18.6938	0	9.15807	4.14495	0	0	0	0	8.71169	2	2
NT5C3B	0	0	0	5.28996	2.55002	8.83673	6.02898	5.14347	15.5403	14.4084	14.0256	2	2
OR2A2	4.52064	14.3698	4.27564	3.97295	5.25673	6.48322	14.724	4.12993	3.48307	3.09682	3.62771	1	2
OR8U3	14.6336	4.52742	3.5875	3.19664	9.68537	7.36923	15.6962	2.60392	12.3903	2.81644	3.9641	2	2
OTOF	14.3744	2.5179	3.34827	2.09332	6.1385	6.79651	0	1.82362	0	10.3764	10.4546	2	2
P4HA2	4.80836	14.3654	4.13189	2.56094	8.53784	16.1968	2.97554	1.18259	7.14952	2.81644	1.39121	2	2
PLXNB2	10.0091	12.0911	7.79066	21.0175	7.6563	13.0506	21.8792	10.5918	9.26825	12.3635	10.3829	2	2
POR	14.3056	4.51545	3.34827	3.19664	5.48246	9.08054	4.43272	13.7126	2.1355	3.86785	1.39121	2	2
PRR36	0	0	0	17.2204	1.38891	8.45702	8.49327	17.8362	5.62292	5.79958	7.14204	2	2
SMTN	3.85896	4.62278	13.7106	0	11.9301	0	0	0	0	0	0	1	2
STK11	5.10737	3.58866	15.5429	16.9238	9.52796	14.3771	6.79244	6.42759	6.05778	5.8684	7.24733	2	2
TMTC3	0	0	1.50429	14.3218	15.8575	2.58672	4.06206	3.64723	5.34729	3.53324	16.9955	2	2
TNRC18	13.9277	3.15042	3.97222	2.91353	8.52044	4.60689	13.8139	2.26589	1.70602	3.33147	3.9641	2	2
TSC2	2.95511	5.44451	2.22457	19.5453	11.1005	14.6063	8.908	10.8347	9.78168	9.6296	12.7896	2	2
UBR2	2.13009	0	0	4.47491	8.42705	12.6197	14.2155	4.0213	8.45356	4.25797	2.90534	1	2
VASP	2.13009	2.86855	2.22457	3.97295	12.4206	3.66491	3.49802	4.0213	14.3038	5.27711	3.62771	1	2
WIZ	1.42692	0	0	13.6819	6.87719	4.87651	4.43272	6.36229	3.32918	13.1127	4.10683	1	2
XPO7	0	0	0	8.00122	3.6243	11.5333	17.1074	6.58762	16.624	7.47048	6.05019	2	2
YWHAH-AS1	2.60079	2.5179	4.40636	3.43321	13.4581	16.6741	13.7789	2.87758	1.09173	3.09682	3.80569	2	2
ZNF230	12.8578	3.15042	13.1792	3.43321	3.80224	4.00198	5.21116	14.3316	3.1569	4.25797	2.90534	1	2
ZNFX1	0	0	0	16.5357	7.34768	7.86422	6.65176	6.33984	10.7044	13.8967	5.81202	1	2
