# Supplementary material
Source: Research Square preprint supplement (doi:10.21203/rs.3.rs-8651907/v1)
Supplement: Supplementary file 5 [file 93bec727a61a5f479ff3eb70.xlsx]

## Sheet: Legend
Sheet	Legend
Z-scores	Z-scores for each gene in genome-wide in vitro CRISPR-Cas9 screens.
TKI resistance genes	TKI resistance genes in genome-wide in vitro CRISPR-Cas9 screens.
TKI sensitizer genes	TKI sensitizer genes in genome-wide in vitro CRISPR-Cas9 screens.

## Sheet: Z-scores
Gene	Huh7_DMSO_R1	Huh7_DMSO_R2	Huh7_SRF_R1	Huh7_SRF_R2	Huh7_RRF_R1	Huh7_RRF_R2	Huh7_LVT_R1	Huh7_LVT_R2	HepG2_DMSO(SRF_control)	HepG2_SRF	HepG2_DMSO(RRF_control)	HepG2_RRF
A1BG	0.862919	0.507389	0.53059	0.427618	1.12748	1.11184	0.795895	1.37072	-0.234904	-0.0432111	0.451619	1.09574
A1CF	0.087377	0.415725	1.00263	0.518928	-1.25068	-0.518459	-1.88331	0.131143	-0.0695966	0.159577	0.0318729	0.0828463
A2M	0.683895	0.182586	0.367266	1.01782	0.220306	0.974323	-0.418093	1.18542	-0.332715	1.06752	0.491461	0.669998
A2ML1	0.475199	0.758441	0.257641	0.827888	1.12558	0.896375	-0.27383	-0.154895	-0.0484834	-0.102076	-0.691592	-0.342099
A3GALT2	0.37723	0.835156	0.74072	1.20311	0.347978	0.129108	-0.762398	0.307974	1.14455	0.351325	0.387272	0.346478
A4GALT	0.286384	0.494378	0.332637	1.27773	0.130762	-0.235815	-0.604717	-1.16192	0.380911	0.929191	0.509255	0.855177
A4GNT	0.93021	0.616021	0.209867	1.53534	0.0414565	0.713781	1.07923	1.00769	0.592161	0.0996359	1.99332	0.788309
AAAS	-1.1432	-1.29623	-1.0784	-1.41618	-1.1215	-1.35538	-1.09798	-1.12922	-0.726817	0.195471	-0.302063	-1.41907
AACS	0.644793	0.0734816	1.19228	-0.902623	0.14036	-0.0906935	-0.782782	-0.483384	0.375924	-0.0168298	0.0981936	-0.344474
AADAC	1.39056	0.615839	0.369361	0.686011	1.33862	0.87076	0.776628	0.810345	0.339369	0.594067	0.821464	0.693268
AADACL2	1.25641	0.882188	1.32689	0.727565	1.50666	1.42645	0.16164	0.687553	1.20788	0.312413	0.0442306	0.00228981
AADACL3	0.577528	-0.0546804	0.135127	0.388972	0.522589	0.87125	0.443088	0.156285	0.496012	0.779904	0.754866	-0.209439
AADACL4	0.659769	-0.0994007	-0.0515342	0.0803927	-1.69274	-0.0818079	0.248158	0.225119	0.917436	-0.0391311	-0.546161	0.664951
AADAT	0.196391	0.0484569	-0.0826949	0.452326	-0.00314395	-0.42709	0.330056	0.825125	-0.06502	0.518798	0.545428	0.529226
AAGAB	-0.124411	-0.482848	1.53919	2.14401	0.741136	-0.750057	2.96659	2.86155	-1.84413	-1.26927	-2.22342	-1.40791
AAK1	-0.75198	-0.497235	-0.391634	-0.403366	-0.871115	-0.480956	0.258244	-0.694162	0.208467	-0.686614	-0.195528	0.747441
AAMDC	0.182652	0.52897	0.174634	0.0622709	-1.2826	0.904198	0.246271	-2.29734	-0.341106	0.0389168	-0.0612183	-0.197303
AAMP	-1.70284	-2.18578	-1.10703	-1.40363	-2.46845	-1.43658	-1.63324	-0.848927	-1.20551	-3.20407	-2.16916	-1.46518
AANAT	0.243012	0.436854	-0.126946	-0.354843	0.0761187	0.710002	-0.732652	0.201549	-0.013603	0.0704384	-0.133037	-0.375039
AAR2	0.666516	0.780307	0.36157	0.229283	-0.396076	0.328533	1.31716	0.446987	0.260954	0.659048	0.596029	1.49472
AARD	1.02025	0.956436	1.27813	0.413758	-0.653254	2.78619	0.0225467	0.900759	-0.26565	0.041733	0.970658	-0.839893
AARS1	-4.52923	-3.07645	-3.76238	-3.72361	-2.70092	-1.3897	-1.65966	-3.95022	-3.01704	-2.66879	-3.08039	-2.9287
AARS2	-1.38619	-2.69962	-2.01971	-2.02056	-1.87906	-1.21041	-1.88682	-1.17652	-2.02485	-2.56254	-1.95756	-0.902496
AARSD1	-0.186999	0.352202	-0.303138	0.75822	0.697805	0.595817	0.566796	0.819993	0.105228	-0.134472	-0.227163	0.308894
AASDH	0.240666	0.727095	1.21749	0.220121	0.848443	0.0865998	1.18958	0.328906	0.0270941	0.490367	0.127074	0.388242
AASDHPPT	-4.01043	-4.12823	-3.28085	-3.45793	-4.84143	-2.26635	-2.8878	-1.74805	-1.32673	-1.61991	-1.47422	-1.19076
AASS	-0.204352	0.10677	0.468714	0.541618	-0.105615	-1.46242	0.290647	-1.05023	-0.0158737	0.591025	0.301689	0.169558
AATF	-1.03249	-1.54824	-0.634242	-1.81635	-1.46943	-1.76261	-0.577796	-0.361887	-2.76337	-2.24558	-2.31532	-0.345916
AATK	-0.39549	-0.30781	-0.591286	-0.784798	-0.388212	-0.811112	-1.32306	-0.506809	-0.0370554	-0.665342	0.316343	0.439203
AAVS1	0.157607	0.165909	0.10527	0.0749817	-0.11946	-0.119097	-0.379076	-0.290899	0.133615	0.109142	0.0199607	-0.241213
ABAT	0.734752	0.521828	0.476332	0.0414551	1.6522	-0.0194575	2.00674	-0.701058	-0.758306	0.366961	0.395421	-0.352655
ABCA1	1.07307	1.13129	0.48714	-0.40258	0.0131881	0.803433	-0.96148	-0.327053	-0.0636118	2.86985	-0.537047	1.92459
ABCA10	0.613614	0.174968	0.414154	0.950298	1.19067	1.27208	-0.060695	1.18084	0.758466	-0.265059	0.328426	-1.11873
ABCA12	0.304775	-0.243093	0.124742	0.0350254	0.998818	0.430463	-0.0617217	-0.646664	0.573287	-0.00338636	0.514644	0.0478347
ABCA13	0.674618	1.0165	0.514255	0.875416	0.347071	0.592385	0.893254	1.36279	0.912136	0.470303	0.813598	0.861858
ABCA2	0.670707	1.07299	-0.375518	0.657635	-0.236145	0.456057	2.25814	1.27938	0.734487	0.113192	-0.530977	0.637332
ABCA3	0.995814	0.0324957	0.798389	0.523042	0.797935	0.343996	1.17855	-0.124138	-0.0704377	0.547653	-0.122395	-0.0409949
ABCA4	0.380841	0.354163	0.209895	-1.54756	-0.796069	0.373002	-1.25241	-0.271249	0.0857731	0.727003	-0.4973	-1.38584
ABCA5	-0.374994	-0.532373	0.23838	0.0769786	0.388385	-1.28215	-0.136553	0.0162352	-0.0503825	0.608808	0.511675	0.239837
ABCA6	-0.416089	0.603815	0.703457	0.415173	-0.166887	0.561765	0.062197	0.636979	0.804232	0.538214	0.802876	0.361518
ABCA7	0.47042	0.739223	-0.170586	0.00880106	-0.314031	0.513374	0.910633	0.795564	1.166	0.642831	-0.500099	-0.535052
ABCA8	-0.195458	0.774101	-0.187444	0.815443	-0.605085	-0.614852	-0.508567	0.467676	-0.0377302	-0.439286	0.938985	-0.606611
ABCA9	-0.624095	-0.602726	-0.0270919	-0.295786	-1.19993	0.604457	1.10369	1.33138	-0.163672	0.17752	0.803103	-0.573404
ABCB1	0.408018	0.511024	0.333432	-0.12705	-0.117046	-0.0258572	-0.613565	-0.322804	0.119236	0.0637256	0.460148	0.172771
ABCB10	0.901842	-0.00171974	0.251041	0.322689	-0.730398	-0.681668	-0.504014	-0.704571	0.464093	0.843296	-0.320783	-1.06439
ABCB11	-0.128014	-0.27662	0.187845	0.795085	1.20061	-0.842487	-0.28679	-0.110636	0.36237	0.409036	0.681063	1.78656
ABCB4	0.8276	1.00601	1.33267	1.65444	0.333582	0.672233	0.197289	0.205434	0.784302	0.614937	0.77266	0.588745
ABCB5	0.98623	0.604075	0.431836	1.7277	0.571142	0.239555	0.485879	0.669535	0.662767	0.16877	1.15504	-0.0351241
ABCB6	-0.0449119	-0.446724	0.121492	-0.266598	-0.978705	-0.553899	-0.0198065	-0.690066	0.387776	0.535686	0.0687823	-1.21476
ABCB7	-3.81594	-4.09707	-4.79117	-3.61173	-3.35461	-4.07166	-0.410988	-2.88564	-1.58817	-1.74323	-3.58129	-2.93013
ABCB8	0.212625	0.556991	1.3809	1.13153	0.850883	1.18472	1.9086	0.0850539	1.14955	1.00701	-0.122726	0.505558
ABCB9	-0.175703	-0.400082	-0.29486	-0.825304	-0.595064	-0.0716702	0.436898	0.384709	-0.280808	-0.00303517	0.24082	-0.35415
ABCC1	0.288239	0.0635455	-0.00226464	0.621006	0.697019	0.526162	-0.203457	-0.205647	-0.12968	-0.633936	0.0232724	-0.612709
ABCC10	0.142273	0.421636	-0.178121	-0.652457	0.0579156	0.479793	0.186856	0.769792	0.0549413	0.0448131	0.670909	-0.0841375
ABCC11	-0.420076	-0.165417	0.212882	-0.0947052	-0.0281601	-0.0162465	1.06383	-1.16974	0.778474	-0.640401	-0.385603	-0.216604
ABCC12	0.84848	0.446229	0.633414	1.34622	1.97769	1.14078	-0.222407	0.670085	-0.711092	-0.648856	0.501956	-0.505471
ABCC2	0.789444	0.0813765	-0.584329	-0.54286	-0.108837	0.414754	-0.360966	-1.89981	1.2788	0.880003	1.26765	0.974967
ABCC3	0.0343853	-0.286956	0.546073	0.0666286	0.234219	-0.498298	0.0775529	0.213625	-0.171985	-0.185919	-0.258836	-0.866731
ABCC4	0.716224	1.14056	1.13673	0.615662	0.488917	0.679443	1.18172	0.531282	1.10168	0.862914	0.286051	0.15368
ABCC5	0.899235	0.551148	0.0364173	0.441714	-0.0779082	-0.455647	1.17553	1.35243	0.14309	1.27141	0.110903	0.116181
ABCC6	0.564315	0.399953	0.831609	0.813897	0.0470134	0.570794	-0.366287	-0.286024	-1.12381	-0.69375	-0.331372	1.24411
ABCC8	1.00057	0.18431	-0.095235	0.320161	0.424113	-0.039441	-0.654982	-0.0630575	0.804311	0.943395	0.102348	0.528857
ABCC9	0.989373	0.196491	0.604896	0.458928	-0.276999	0.703731	1.0228	0.0797277	0.925181	0.393736	0.935052	0.249134
ABCD1	0.215393	0.395045	0.939878	0.506037	2.83381	2.4083	1.45804	0.333131	1.11994	1.50003	0.640447	1.00675
ABCD2	0.737283	0.657391	0.635311	-0.249227	0.19115	0.731041	0.157744	-1.5854	0.837521	-0.0890216	0.520638	0.517129
ABCD3	0.0652807	0.103978	-0.698015	-0.499392	-1.35616	0.617775	-2.60665	-0.216715	0.219998	0.50701	0.10082	0.149785
ABCD4	0.0973773	0.720888	-0.132891	0.0968649	-0.525845	0.307208	1.28168	0.381649	-0.278245	0.66162	-0.850051	-0.927031
ABCE1	-2.65618	-1.53601	-2.39644	-2.20855	-1.90211	-1.8151	-3.58191	-1.89361	-2.13027	-3.11795	-1.75417	-3.50981
ABCF1	-2.92171	-2.89232	-3.10484	-3.74745	-1.78549	-2.53598	-1.9891	-2.05596	-2.64367	-2.69116	-1.44249	-1.60901
ABCF2	-0.057197	-0.257714	-0.14162	0.292163	0.769888	-1.13322	-0.951379	0.0448409	-0.137797	0.139613	0.592587	0.9654
ABCF3	0.2272	0.388334	-0.0874057	-0.011515	-0.397023	-0.42852	-0.125621	0.621179	0.195494	0.201918	0.425979	-0.807056
ABCG1	0.638915	0.065553	0.363374	0.465557	0.148324	0.328533	1.27156	0.382475	0.087682	0.498554	0.584343	0.40105
ABCG2	0.193189	0.682374	-0.0826069	0.654334	0.0219892	-0.317213	-0.549273	-1.19373	0.168143	1.35097	1.13568	0.62323
ABCG4	-0.126634	0.739223	0.877039	0.460396	0.66994	1.29637	-0.0205614	0.585596	-0.434536	-0.118076	0.294106	0.231678
ABCG5	-0.212581	0.902159	0.428674	0.119589	-0.125745	0.398107	0.161217	-0.779736	0.56118	0.310407	0.62808	1.50965
ABCG8	0.0732595	0.188128	-0.144785	0.797757	0.759968	0.491048	-0.304169	0.209432	0.797602	0.445049	-0.240759	0.603343
ABHD1	0.0427321	0.143199	0.842527	0.399295	0.0372384	-0.0373697	-0.329643	0.143058	0.49523	-1.00885	0.506154	0.760391
ABHD10	0.409432	0.288009	0.173056	0.106614	-0.694367	0.930712	0.986265	0.557314	0.244669	0.201788	-0.211923	0.278104
ABHD11	0.382881	0.298	0.473169	0.485339	-0.601758	-0.556963	0.563443	-0.523176	-0.69654	-0.185718	-0.79321	-0.10456
ABHD12	0.75277	1.06029	0.152521	0.268011	0.611931	0.220006	-0.133156	0.546402	0.887199	0.336048	1.26674	0.435464
ABHD12B	0.551792	0.825261	1.04009	0.411479	-1.27204	-0.191938	-0.11706	-0.616731	1.1156	1.06058	0.220285	0.31711
ABHD13	1.11585	0.602075	1.02821	0.778997	0.464076	1.09229	0.637142	0.375352	-0.303613	0.199967	-0.908102	1.3051
ABHD14A	-0.0119847	0.211915	-0.499738	-0.543541	0.227202	-1.30182	-0.44113	-0.691167	0.272403	0.126156	0.52147	-0.606127
ABHD14B	-0.0524153	-0.157626	0.432634	-0.330581	0.479098	0.464841	-0.55708	0.58409	0.439743	0.23318	-0.498832	0.482743
ABHD15	-0.634419	-0.19388	-0.603771	0.319102	-0.49562	-0.27101	-0.76806	-0.556865	0.482575	1.57566	0.595348	0.390346
ABHD16A	0.452914	-0.148614	-0.655582	-0.825566	0.400906	-0.627497	-1.71387	0.463451	-0.900123	-0.682386	-0.172648	1.11048
ABHD16B	0.778889	0.990145	0.219256	1.79252	0.237868	-0.0373922	0.86597	1.50201	-0.283213	0.0711005	-0.220356	-0.330013
ABHD17A	-0.184929	0.354402	-1.32117	0.489478	-1.27486	0.157766	0.27588	0.25162	-0.662959	-1.96674	-0.600809	-0.508968
ABHD17B	0.611927	1.11275	2.13892	0.527863	1.20896	0.411016	0.208387	-0.152255	-0.262736	0.781202	0.116248	0.0965638
ABHD17C	0.700021	-0.10727	0.262275	-0.0754345	0.0675615	0.10047	0.47833	0.166597	-0.215678	0.176912	0.452849	0.774976
ABHD18	1.37704	1.14976	0.830289	-0.241262	0.627175	-0.176132	0.758766	2.60965	1.05268	1.50086	2.02774	2.04541
ABHD2	0.713745	-0.0105392	0.49011	1.99754	0.172157	0.147533	1.18036	1.51577	1.36826	1.22088	0.0488501	0.874637
ABHD3	0.138917	0.153811	-0.276105	0.505671	0.0800323	-0.714861	2.00297	1.34012	0.280301	-0.0420725	0.821275	0.104354
ABHD4	0.792613	0.224323	0.588286	0.126154	0.287751	-0.884975	0.65348	-0.566805	-0.233515	0.0446409	0.246625	-0.409064
ABHD5	-0.386009	-0.52923	-0.0491335	-0.186416	-0.0860137	0.107312	1.71533	0.398712	0.0990396	0.674258	-0.0185951	-0.397081
ABHD6	0.096608	0.370192	0.602174	-0.25114	-0.155711	-0.743745	-0.000841929	-0.24078	1.23876	0.883694	0.432994	-0.166084
ABHD8	0.743544	0.0807948	0.466679	-0.270397	-0.310093	0.414183	1.59242	0.856013	0.0738249	-0.19169	-0.577191	0.644894
ABI1	0.158594	0.947061	-0.537413	-1.05613	-0.798408	-1.33986	1.52961	0.0268065	0.847143	0.885953	-0.0456844	-0.217132
ABI2	0.335003	-0.184089	0.630251	0.680613	-0.545504	-0.0213736	-0.903922	-0.553077	-0.335297	1.37385	1.21192	-1.0416
ABI3	0.067269	-0.0972452	-0.249374	-0.480371	-1.62769	-0.752835	0.510672	-1.18985	-0.243607	0.421987	0.0220982	-0.158893
ABI3BP	-0.602474	0.0725649	-0.206639	-0.286642	0.725993	-0.235768	1.03433	0.473974	0.760832	0.516069	0.111052	0.107595
ABITRAM	0.726523	0.240027	-0.260732	1.20067	0.902621	0.949014	-0.180718	-0.603569	0.872726	0.863227	0.228983	-0.0345555
ABL1	1.60307	0.508297	0.459144	1.2099	0.568057	1.56465	-0.0363702	0.27197	0.614692	0.483165	0.724592	0.316356
ABL2	0.401167	0.193372	-0.0072697	1.14927	-0.857909	-0.287934	-0.345607	-0.101474	0.55985	0.408275	0.140546	0.800961
ABLIM1	0.485371	0.571041	0.437639	-0.462109	-0.345023	1.53477	1.52583	-0.0412026	-0.0897418	0.768362	-0.290036	0.124539
ABLIM2	0.232886	0.424599	0.437887	0.0738801	0.210184	-0.162504	-1.58719	0.374251	0.443263	0.901432	0.365621	1.05719
ABLIM3	0.561402	0.744313	0.771933	0.490972	0.184114	0.731307	-0.535895	-0.318977	0.357519	-0.2424	0.872368	-0.336274
ABO	1.20142	0.784644	0.963611	0.920036	1.3752	1.42167	0.791199	0.336774	0.334694	0.700944	0.707725	0.19442
ABR	0.115942	0.511024	1.22679	0.139564	-0.698278	0.213041	-0.226771	-0.660651	0.114923	-0.327981	-0.340202	0.453517
ABRA	0.75507	0.61654	0.399386	0.370343	0.180666	0.835544	-0.600354	1.14636	0.0789727	0.918477	0.556584	0.4829
ABRACL	0.711138	0.411014	0.840822	-0.19714	0.257567	-0.839893	-0.977349	-0.0274907	0.568789	0.528103	0.0510266	1.53794
ABRAXAS1	-1.15657	-0.63737	0.25631	-0.751523	0.0305443	-1.06769	-0.399035	-1.25391	1.13383	1.71974	0.602704	-0.321751
ABRAXAS2	1.10445	1.84079	0.54665	0.357531	0.847757	0.353617	-0.109299	0.848113	0.889976	0.760779	1.38133	1.54832
ABT1	-1.76336	-2.28449	-2.62892	-2.09555	-1.28234	-2.28555	-2.8733	-2.17382	-2.85666	-3.02959	-3.74561	-2.30268
ABTB1	-0.190628	-0.223537	0.71333	0.976604	0.0425232	0.465351	0.347964	2.033	0.594293	0.622766	-0.153703	0.67267
ABTB2	0.534082	0.346234	1.11662	0.0287425	0.919356	0.801432	0.387735	0.41945	1.23088	0.706267	0.734501	-0.0607822
ABTB3	0.664523	0.0491633	0.228562	-0.18536	0.358564	0.993279	1.08779	0.908514	-0.365847	-0.334781	0.293066	0.0605572
ACAA1	-0.657012	0.478822	0.230385	-0.281978	-0.801231	0.0909712	0.227427	-0.280687	0.456015	0.626099	0.595972	0.810996
ACAA2	0.282834	0.644458	-0.630667	0.223687	-0.175154	-0.538804	0.493625	-0.340613	0.200868	0.823903	0.0975299	-0.780972
ACACA	-2.2567	-1.55819	-0.977116	-2.00641	-1.20989	1.11929	0.575342	0.327012	-1.75981	-1.98709	-1.59836	-2.00715
ACACB	0.840148	0.44545	0.788901	0.365889	1.13462	-0.703627	-0.233431	0.503664	0.425348	0.470885	0.320068	0.614872
ACAD10	-0.0259105	-1.26831	-0.133246	-0.913287	-1.45082	-0.725095	-0.780668	-1.32397	0.295087	0.338307	1.01958	0.685918
ACAD11	0.464516	0.632304	0.768963	1.30246	0.228452	0.372553	1.04086	0.870583	0.435127	1.12626	0.0805211	0.373913
ACAD8	0.397711	1.0452	1.10122	1.11031	0.177641	0.134541	0.104233	0.306533	0.982879	0.887116	0.608641	1.11413
ACAD9	-2.19504	-1.9421	-3.4354	-3.10658	-2.04174	-2.94962	-1.91949	-1.29512	-0.633093	-2.41133	-0.204094	0.336215
ACADL	-0.216006	0.211798	0.128122	1.19176	0.315455	-0.753897	0.796272	0.799061	-0.149004	0.153989	0.302502	2.71835
ACADM	0.543384	0.30563	0.796931	-0.302153	0.106184	-0.67315	-0.465796	1.09715	-0.705928	-0.293422	0.410114	-1.13814
ACADS	0.391772	0.72938	0.433046	-0.0989733	-0.640471	0.496237	0.1593	-0.981109	0.831047	0.0728743	0.596067	0.070593
ACADSB	0.215492	0.712915	0.434944	0.480203	1.39669	-0.551775	0.737431	-1.1083	0.730008	0.00501746	0.258765	0.486041
ACADVL	-0.175499	0.908833	-0.181861	1.00883	0.23444	0.45142	1.30795	0.711285	0.364932	0.101812	1.60775	2.75091
ACAN	0.615812	-0.34622	0.699497	0.906255	-0.313617	-0.32655	0.560816	1.20551	-0.360879	0.914361	-0.00459856	-0.0627297
ACAP1	0.290059	0.414769	0.381511	0.265058	0.614331	-0.0501139	0.0118112	0.674877	0.364247	0.540092	0.869456	-0.276256
ACAP2	1.17113	0.602595	0.820444	1.23515	0.632296	0.620921	0.56669	1.08802	0.177696	0.120305	0.842359	0.794777
ACAP3	0.068897	0.00477536	-0.772706	-0.223996	-0.727313	-0.158872	0.161444	-0.212284	1.21326	0.00176956	-0.127406	-0.110767
ACAT1	0.089649	0.311058	0.140866	-0.210188	0.294345	0.252934	0.227669	-0.437715	0.121349	1.1308	0.274554	-0.305047
ACAT2	0.494929	0.438178	0.716575	0.300188	-0.101939	-0.487533	0.665015	0.61663	0.0362689	-0.629731	0.113247	-1.50727
ACBD3	-0.164458	-0.70941	0.174854	-0.27438	-1.13886	-0.964598	2.44311	0.231741	1.28304	0.626278	0.63086	1.37631
ACBD4	-0.605183	-0.154743	0.157716	0.175564	-1.24911	-1.21466	0.753723	-0.394881	-0.0748187	-0.0269157	-0.603778	-0.479457
ACBD5	0.981604	0.269895	1.0551	1.41539	0.982547	0.886407	1.29663	0.749523	0.962577	0.540428	0.712642	0.554757
ACBD6	-0.473924	-0.679337	-1.40997	-1.32084	-1.84267	-0.902215	-1.50694	-0.803631	0.776792	0.259358	1.13498	-0.451567
ACBD7	0.500654	0.823392	0.626071	1.01666	0.611548	1.26587	-0.349134	1.08769	0.301486	-0.366477	0.199541	0.900921
ACCS	-0.229934	0.145328	0.635559	0.205603	2.0775	1.52758	-0.87395	-0.263409	0.795099	0.596729	0.99401	0.551473
ACCSL	0.334732	0.154343	-0.11063	0.224468	1.86175	1.81772	-0.36056	-1.09814	0.511013	0.211277	0.374432	0.240491
ACD	-1.56522	-0.733303	-1.09009	-0.639776	-1.36624	-1.29539	-0.350399	-0.231266	-0.625504	-0.794654	-0.583564	0.0280901
ACE	-0.23387	-0.244521	-0.994386	0.91498	0.702282	-0.234446	1.19682	0.511062	0.165804	-0.128746	0.94046	0.78612
ACE2	0.537021	0.266363	0.00432719	0.23887	-0.493886	1.46838	-0.101629	-0.349094	0.0573548	0.139425	0.295883	0.0822635
ACER1	0.994331	0.735197	-0.217364	0.600072	0.313197	0.763438	1.43222	1.9812	0.303206	0.446615	0.337105	-1.13099
ACER2	-0.0273315	0.906989	0.509497	0.0897154	0.650846	0.480242	-0.756856	0.266789	-0.241965	0.0787684	-0.452769	-0.26552
ACER3	0.0514392	0.426882	0.359522	0.403723	0.285876	0.173352	-1.22042	-0.0449423	0.372286	0.734407	-0.143167	-0.262707
ACHE	0.543078	0.48843	1.42234	0.433959	-0.229098	0.305288	0.539179	0.196562	-0.48752	0.206709	0.854744	0.0175283
ACIN1	-0.472774	-1.23465	-0.814286	-1.57994	-1.53349	-0.272199	-0.67144	-0.979214	-1.77833	-1.95765	-1.33051	-0.800233
ACKR1	1.12027	0.726835	0.877617	0.159592	1.43065	-0.614383	0.706855	-0.308755	0.055794	-0.563029	-0.390614	-0.240122
ACKR2	0.0152178	-0.194035	0.465717	0.442107	0.233069	-0.524158	-0.27125	1.04133	0.888861	0.539086	-0.254109	-0.0927092
ACKR3	0.955511	1.02492	0.736898	1.45296	0.655322	0.647047	1.4375	0.903074	0.696309	1.11337	0.161991	0.589811
ACKR4	0.636053	0.771659	0.297866	0.394867	1.14323	-0.446271	0.579449	0.548556	0.463408	0.477528	-0.41826	0.344559
ACLY	-2.5859	-2.5612	-3.55063	-1.29836	-2.00476	-1.94332	-1.9974	-2.00934	-2.00196	-2.29345	-1.69962	-1.62853
ACMSD	0.215584	-0.296201	-0.698042	0.0387538	0.161208	0.189673	0.659972	-0.780772	-0.275605	-0.288836	0.88827	-0.871706
ACO1	0.575713	1.08361	0.747458	0.374902	0.167338	0.073153	1.00601	1.01505	-0.808219	-0.0328187	-0.656591	-0.600157
ACO2	-0.759468	-1.36292	-0.235212	-0.996395	-0.81728	-0.975608	-0.267087	-1.20481	-2.46608	-3.15866	-4.00486	-3.78175
ACOD1	1.1571	0.644432	0.0552523	1.00105	2.10351	0.314255	0.375504	-0.249133	0.25622	0.525195	0.633715	-0.347159
ACOT1	0.484297	-0.219668	-0.209279	-0.0400792	0.847919	0.0949544	0.109729	0.288321	0.251992	0.504146	0.400697	-0.497368
ACOT11	0.295352	0.834325	0.404144	-0.195149	0.583824	0.342424	-1.08635	0.224375	0.307475	0.0695772	-0.118044	0.857167
ACOT12	0.710934	0.908755	0.202332	1.07983	0.901431	0.42317	-1.31361	0.508877	0.614575	0.172076	0.747718	1.06095
ACOT13	-0.329554	0.1211	0.191629	-0.957461	0.560032	2.13335	-1.39563	0.931016	0.349774	0.113604	0.624695	-0.334337
ACOT2	0.339061	-0.239197	-0.166057	-0.117979	0.290675	-0.300821	0.400871	-1.18527	0.538943	0.686136	0.809967	0.279994
ACOT4	-0.938084	-0.324924	-0.505898	-0.277838	-0.831132	0.84829	-0.0970688	0.000273085	-0.434927	-0.182564	-0.359565	-0.000880144
ACOT6	1.08283	0.238106	-0.176911	1.29557	0.925163	1.00225	0.883349	1.22033	-0.170518	0.591607	0.0367587	-0.00606863
ACOT7	-0.101154	0.913871	0.313621	0.241221	-0.567784	0.089909	0.355558	0.771152	-0.463189	-0.148318	-0.337139	0.0790225
ACOT8	1.05194	1.34874	0.294013	1.76098	1.57935	0.334498	0.54309	0.148255	0.0150637	-0.25345	0.388822	0.458094
ACOT9	0.208178	0.356495	-0.217172	-0.508196	0.953734	1.73652	0.49749	0.72864	0.960778	1.12735	0.551025	0.443325
ACOX1	0.604286	-0.270725	0.171216	0.985067	-0.733705	-0.257735	-0.81446	-0.302918	0.564955	0.0886391	-0.540167	-0.494781
ACOX2	0.745767	0.431167	0.1797	0.357295	0.843281	1.83766	0.453039	-0.340639	0.593295	0.517925	0.738453	0.635683
ACOX3	0.178399	0.291544	0.896785	0.952499	-0.234857	1.4347	0.433349	1.98007	-0.0365841	0.161478	0.437797	1.99723
ACOXL	-0.489973	-0.6007	-0.562108	-1.04419	-0.811493	-1.04986	-0.415954	-1.01682	0.0212324	0.691907	0.380237	-0.412888
ACP1	1.50066	0.755948	0.896207	0.586657	1.01261	0.931243	0.283158	0.660598	0.652146	1.40597	-0.0687839	1.38868
ACP2	0.20599	-0.119372	0.676479	-0.490694	2.57532	1.77666	-0.525167	-0.153283	0.493665	0.0607752	1.03572	1.15607
ACP3	0.912448	0.862814	0.844974	0.884377	0.784123	1.24187	1.58457	1.17403	0.344239	0.330102	0.324436	0.366791
ACP4	0.468784	1.12345	0.901075	0.197106	1.10445	0.17037	0.695274	1.39128	0.820505	1.11433	-0.061657	0.997085
ACP5	0.440417	0.491521	0.599726	0.0599262	1.21269	0.0217472	1.38103	1.44001	1.21619	1.42944	0.215085	0.512097
ACP6	-0.274684	-0.735069	-0.303523	0.979381	0.0270642	-0.0631665	0.0552665	-0.227159	0.0190947	0.419258	0.248062	0.352065
ACP7	0.339015	0.131901	0.711487	0.608063	-0.109634	0.513579	1.09933	-1.04017	-0.275644	-0.178515	0.723363	0.582334
ACR	-0.54883	-0.172558	-1.45639	-1.18368	0.685909	-1.07296	-0.717719	-0.918587	-0.194927	0.0900754	-0.653036	0.18383
ACRBP	0.22846	0.161447	0.409396	-0.712431	0.333481	1.00078	0.593551	0.489547	0.506828	0.404652	0.0223718	-0.201804
ACRV1	0.879173	0.705799	1.25762	1.30914	0.45468	0.20867	0.827075	0.202666	0.574245	0.971467	0.774097	0.913288
ACSBG1	-0.30295	0.264218	-0.376041	0.835067	2.10613	1.54893	0.456511	0.694465	0.781545	-0.448256	-0.0112716	-0.548656
ACSBG2	0.828878	0.39352	0.0811444	-0.196537	0.527529	0.0437365	0.0838492	0.795143	0.00252681	0.365865	0.966592	0.607153
ACSF2	-0.593682	-1.01342	-1.93627	-0.858579	-0.028023	-1.37158	-0.904617	-0.957182	0.41107	0.312313	-0.17418	-0.398261
ACSF3	0.412435	0.280008	0.281322	0.209832	0.66371	-0.551162	0.0478075	-0.436932	0.69054	0.598787	-0.307622	-0.364758
ACSL1	0.844109	1.00721	0.636191	0.0964278	-0.308113	0.268254	-0.488786	-1.14081	0.899403	0.77165	0.345823	-0.73004
ACSL3	-0.178566	-0.603167	-0.117733	0.0217967	-0.275292	-0.667492	-0.56102	-0.155779	0.255937	-0.627852	0.411135	0.461605
ACSL4	-0.429966	-1.30901	0.88628	0.366518	0.148143	0.735944	0.021988	-0.154573	-2.2572	0.384699	-2.71922	0.561167
ACSL5	0.711291	1.04401	-0.29002	0.488692	0.446535	0.992584	0.101334	0.424145	0.523042	-0.947027	0.808076	-0.440238
ACSL6	1.20581	-0.260259	0.552728	0.135718	0.329509	0.13256	-0.271349	0.327416	0.423939	1.06577	-0.245222	-0.912873
ACSM1	1.41527	0.125853	1.42908	0.917966	1.06316	1.29096	0.46083	1.26787	-1.08534	-0.904013	0.222308	-0.285523
ACSM2A	-0.651721	0.114275	-0.0599686	0.554666	0.133605	0.424682	0.341728	0.44859	-0.431055	0.136311	-0.911903	0.425371
ACSM2B	0.78446	1.20502	0.999141	0.538264	0.626812	0.158216	0.788632	0.554141	-0.488009	0.029484	-0.0226984	0.925186
ACSM3	0.893459	0.412518	0.625741	0.545705	1.74061	1.14648	0.991248	0.210323	-0.413668	-0.298522	-0.263734	-0.478732
ACSM4	1.01667	0.931089	-0.562878	0.830168	0.0714389	0.846554	0.425664	0.31249	0.675753	0.280198	1.1758	1.01349
ACSM5	0.900922	0.152272	0.878084	0.285479	0.693249	0.280796	-0.00630782	-0.157955	-0.40338	-1.08674	0.399846	0.326648
ACSM6	0.435254	0.622332	-0.180239	0.226158	-0.306078	-0.106891	0.397504	-0.369343	0.164767	0.721679	0.278979	0.741656
ACSS1	1.23454	0.655625	0.997436	0.641496	0.656008	1.51804	0.358125	0.850137	0.88892	0.634666	0.937453	0.876641
ACSS2	0.568353	1.22411	1.41948	1.16425	1.0389	0.679709	-0.0142651	-0.386147	0.0337889	-0.195046	-0.28062	0.277791
ACSS3	0.511566	0.807056	0.133769	0.284675	1.28223	-0.13583	1.05595	-0.3393	0.226722	0.288832	0.93335	0.418747
ACTA1	0.487364	0.0712742	0.374042	0.21061	0.845842	-0.622962	-0.0502614	0.705781	0.765409	0.544745	0.734331	0.729843
ACTA2	1.07113	-0.227719	1.16951	0.14493	-0.436341	-0.273674	-1.17654	-0.936395	0.718762	0.640974	-0.175447	-1.20131
ACTB	-4.84843	-4.11525	-4.14051	-5.22413	-4.13895	-3.26971	-3.75917	-3.19695	-1.90006	-1.3667	-2.10354	-1.37677
ACTBL2	0.829005	0.860087	0.721388	1.33325	0.515431	0.314153	0.924072	0.414253	-0.0835613	0.74586	-0.586211	0.0804298
ACTC1	0.263743	0.538527	0.792228	-0.467925	-0.0954399	0.541216	0.648784	1.51059	0.396206	0.518932	-1.12219	-0.879368
ACTG1	-1.38642	-1.70957	-1.28955	-0.247838	-2.26823	-1.69265	-1.8979	-1.15273	0.0581841	-0.47313	-0.763239	-0.834477
ACTG2	-0.665547	-0.345441	1.05601	0.34671	-0.666965	0.172331	0.169507	-0.619645	0.298989	-0.575063	-0.226577	-0.438475
ACTL10	0.324297	1.13098	0.386048	-0.245402	-0.0187279	1.90596	-0.205979	-0.114506	0.742643	0.323134	-0.362572	-0.635311
ACTL6A	-1.39156	-0.858608	-1.97893	-2.07799	-1.49292	-1.58516	0.535072	-0.732546	-1.85293	-2.44377	-1.42861	-1.96933
ACTL6B	0.156444	0.115114	1.03288	0.185546	-0.509553	-0.083056	-0.201555	-0.269814	0.612052	-0.306575	0.515306	0.759268
ACTL7A	0.415652	-0.144692	0.300338	0.369479	0.140037	0.607358	0.567264	-0.272121	1.0837	1.1877	0.244602	0.084808
ACTL7B	0.956277	0.823703	0.675104	1.15013	0.896229	1.21579	1.09785	1.11754	0.855319	1.13885	-0.284704	-0.679363
ACTL8	1.15559	0.553797	0.595821	0.266808	-0.308198	-0.133875	0.205126	0.499698	0.717295	0.103095	0.543783	-0.206081
ACTL9	0.139731	-0.0775496	-0.439594	0.330198	-0.194872	-0.495826	1.53625	1.34579	-0.527106	0.330207	-0.167437	0.513135
ACTMAP	0.119198	0.761012	0.14588	-0.0813874	0.370762	-0.11164	0.182794	0.212881	0.384079	-0.479371	0.627607	0.0404145
ACTN1	-0.272512	-0.0401528	-0.132297	-0.582161	-0.0175504	1.61196	0.777398	1.07495	-0.0170374	-0.343236	0.674502	0.423396
ACTN2	0.444327	0.214044	0.0199061	-0.0431866	1.05457	0.212122	-0.252022	1.03427	0.0748419	0.198093	1.17673	0.886919
ACTN3	-1.23109	-0.707722	-1.16112	-1.08181	-2.44808	-1.1129	0.236245	-0.72123	0.148859	-0.323865	0.471398	0.551643
ACTN4	0.273204	0.0248216	1.71346	1.0055	1.26084	0.822573	2.07061	0.395604	0.121042	0.273819	-0.413457	-0.342527
ACTR10	-2.06784	-1.52728	-1.50185	-0.559497	-1.15076	-0.737331	-2.61979	-1.22109	-2.18405	-3.5463	-1.69005	-0.071543
ACTR1A	-1.12661	-0.741353	-1.2657	-0.56948	-0.0498696	-0.614464	-2.13028	-1.53585	-1.05739	-1.26343	-1.81769	-0.402355
ACTR1B	0.304322	0.600309	0.821269	0.735294	-0.0278355	1.36204	-1.25587	-0.103902	-0.372673	-0.472436	0.593476	-0.810752
ACTR2	-2.38868	-3.16267	-1.83628	-2.47496	-1.49685	-1.85541	-1.66407	-2.85602	-3.20109	-2.04518	-2.72111	-2.47894
ACTR3	-1.11522	-1.51806	-0.399554	-2.04445	-2.06896	-1.78571	0.384292	0.766441	-2.3943	-0.816575	-0.484782	-0.622219
ACTR3B	0.10104	1.07816	0.0359388	0.105272	0.399252	0.485533	0.787228	-0.179733	0.92436	0.19824	0.0979213	-1.00223
ACTR3C	1.06047	0.982354	0.437419	0.20007	-0.0511177	-0.0286618	1.61718	0.527785	0.0414128	1.16446	-0.535478	-0.118698
ACTR5	0.413326	0.695126	-0.1039	-0.445917	-1.22449	-0.790052	-1.19635	-0.515551	-1.72983	-0.791947	-2.43823	-0.686087
ACTR6	-1.86605	-1.07135	-2.30348	-1.44231	-1.27929	-1.77985	-2.03742	-2.53677	-2.79447	-1.77115	-1.72677	-1.06072
ACTR8	-1.6666	-2.04442	-1.45554	-1.9555	0.125056	-1.12374	-0.577282	-1.47126	-1.28472	-2.1863	-1.45961	-0.637571
ACTRT1	0.591073	0.391466	1.32414	0.581391	1.48533	1.35553	-0.206915	0.51519	1.09065	1.63993	0.751292	2.45893
ACTRT2	0.77572	0.260486	0.349344	0.629338	0.0509755	0.0315377	1.11438	0.561588	0.0404798	0.297482	0.848996	-0.450942
ACTRT3	0.81477	0.524918	0.142085	-0.253419	-0.466223	0.0849126	1.07177	1.28571	0.0767704	0.293881	0.0133563	-0.347526
ACVR1	-2.01985	-2.56016	-2.81334	-2.89698	-0.642951	0.0697928	-3.26045	-2.61383	-0.267977	-2.09542	-1.52271	0.431299
ACVR1B	2.21987	1.26426	0.732195	1.6507	-1.45036	-0.132803	3.14039	2.72297	-0.270598	0.268106	0.487452	-0.465882
ACVR1C	0.409631	0.767556	0.577451	0.172066	0.179577	-0.636117	0.375006	-0.590181	0.331839	-0.447227	0.815943	1.18939
ACVR2A	1.61894	1.43351	1.67895	2.08972	-1.24096	-1.4675	3.32218	2.90283	-0.669491	-0.775618	0.513263	-0.122116
ACVR2B	0.545378	-0.18292	-0.089262	-0.0597691	-0.592322	-0.097081	-0.0701621	-0.0155272	0.437435	1.17265	-0.400958	-0.217365
ACVRL1	0.655169	0.621994	0.570053	0.283239	0.303357	0.657015	0.385651	-0.0235892	0.650484	0.342937	0.790302	0.745579
ACY1	-0.46227	-0.0314009	0.492805	-0.191402	0.37796	-0.0614425	0.0837586	1.16423	0.551206	-0.255485	-0.190083	0.291253
ACY3	-1.49606	-1.40837	-1.57418	-1.59134	-1.38886	-1.60665	-0.246797	-2.02958	0.343241	0.505198	-0.567907	-0.127823
ACYP1	0.725066	0.498013	-0.135749	0.0275137	0.0949529	-0.475828	1.11089	1.23528	0.707301	1.40311	1.09655	0.30308
ACYP2	-0.402442	-0.321496	-0.473172	0.969608	0.0807804	1.22949	0.516183	0.786029	0.587702	0.20192	-0.336591	0.146871
ADA	1.28154	0.880604	1.31377	0.860141	0.251599	0.702444	-0.239094	-0.332253	-0.6744	-0.302638	0.272947	0.107396
ADA2	0.845106	0.0121067	-0.168171	0.209903	-0.654323	1.06543	-0.306511	-0.560782	0.201064	-0.681469	1.18764	0.441463
ADAD1	0.469398	-0.512324	-0.0534043	-0.0238556	0.0814699	0.456159	0.434089	-0.166234	0.963164	0.309331	0.288944	0.235558
ADAD2	0.424469	0.206869	0.0360323	0.881495	-0.0817211	0.173822	-0.776183	0.118629	0.490751	-0.378646	1.15773	1.94562
ADAL	0.78699	0.522997	0.183728	0.926351	0.36931	-0.755347	1.99602	0.629629	-0.325792	-0.409134	0.060328	0.664809
ADAM10	0.236899	-0.380942	0.0756603	-0.485873	-0.749432	-1.64716	0.442605	-0.306515	0.0899078	0.376803	0.307872	-0.764198
ADAM11	-0.861644	-0.296072	0.0232502	1.03941	0.60929	0.104555	1.07109	0.291526	0.238397	-0.123265	-0.437018	-2.14062
ADAM12	0.895913	0.961838	1.20905	0.547828	0.353583	0.886039	0.751383	0.208672	1.31119	1.14303	0.472722	0.392009
ADAM15	-0.503851	-1.27402	-0.512883	0.346081	-0.82472	-1.17838	-0.664918	0.374283	0.329961	-0.742558	0.725424	-0.717886
ADAM17	0.488233	0.500065	0.0739526	0.332072	0.566867	0.681282	0.233452	-0.62264	1.44467	0.338933	0.642016	1.62039
ADAM18	0.215745	0.292035	1.06327	0.717294	0.610056	-0.301722	-0.0989411	1.08326	-0.240302	-0.263359	0.606259	-0.182987
ADAM19	1.02104	0.913014	0.760631	0.468203	0.185626	-0.29726	1.2391	1.28751	0.158401	-0.400052	0.72741	-0.925681
ADAM2	0.60357	-0.226134	0.436484	0.4234	0.726074	0.991767	2.34541	0.178593	0.53597	0.326845	0.43099	1.64114
ADAM20	0.705541	0.612749	0.0366098	0.153951	-1.28661	-0.490495	1.27338	0.419239	-0.0830724	0.0397265	-1.00874	0.33721
ADAM21	0.312007	0.394323	-0.51995	0.345505	-0.0736982	0.624618	-0.5	-0.234777	1.00275	0.664573	0.30547	0.816228
ADAM22	0.931615	0.775737	0.772208	0.0304953	0.421149	-0.436262	-0.109329	-0.471776	0.469158	0.537967	1.22474	1.28335
ADAM23	0.164402	0.680323	0.491567	0.240943	0.618847	-0.364748	0.189407	-0.390021	-0.77407	-0.61546	0.335876	-0.438902
ADAM28	1.37602	1.37886	1.42251	0.329895	1.07054	-0.407685	1.1294	-0.0148796	0.910434	0.063739	0.160271	-0.14532
ADAM29	0.558948	0.423949	0.502045	0.316202	-0.145061	0.618735	-0.482029	1.30587	0.749958	1.23244	0.774948	-0.874222
ADAM30	0.761178	0.767712	0.249935	0.310511	1.63998	1.21248	-0.568238	0.773548	-0.21296	0.737471	1.35973	1.50809
ADAM32	0.721437	0.718395	0.50969	1.09448	-0.0307733	1.1648	-0.254662	1.06459	0.89379	1.24886	0.272644	0.227058
ADAM33	0.401703	0.0956288	-0.595741	-0.838981	0.246074	-0.205144	0.915314	0.659433	-0.207777	-0.343729	-0.630042	-0.240913
ADAM7	0.30515	0.929765	1.48606	0.810543	0.681191	0.34753	1.54063	0.23098	0.47309	0.946996	0.403685	2.59994
ADAM8	0.906698	0.781736	0.657504	0.899102	-0.139645	0.326961	-0.720256	0.0797277	-0.32452	0.17183	0.572392	0.270058
ADAM9	-0.128653	0.730133	0.516813	0.548247	1.76781	0.308331	0.460935	-0.334307	0.781936	0.964041	0.305943	-0.780816
ADAMDEC1	0.823741	1.23289	1.07444	0.94739	0.348946	0.359133	0.305052	0.921772	0.382867	0.849962	0.258765	0.193567
ADAMTS1	0.457437	0.76109	0.0867471	-0.00689846	0.121044	-0.321062	0.628325	1.56563	1.17117	0.875664	0.149515	0.358248
ADAMTS10	0.0826873	0.792955	-1.73607	-0.211288	0.190667	0.646148	0.498562	1.62747	0.345706	0.352958	0.355334	-0.057726
ADAMTS12	0.226893	0.582598	0.386956	0.0217521	0.755411	-0.0494562	0.625184	0.00561539	0.696153	0.296456	0.884904	-0.67254
ADAMTS13	0.438755	0.147916	0.272821	0.67388	0.595942	0.209528	-0.101795	0.860514	0.501195	0.945587	1.16775	0.288694
ADAMTS14	-0.426593	-1.02097	-0.894092	-0.293428	-0.0655322	-1.29065	0.230583	-1.07283	-0.129582	-0.454296	0.442486	0.294025
ADAMTS15	0.0937994	0.07538	0.69155	0.0646816	-0.260865	0.457058	0.506535	2.31404	1.42726	-0.0986311	0.862535	0.444832
ADAMTS16	0.846869	0.468901	-0.0369921	0.432911	-0.283441	0.584337	-0.119974	0.535329	0.61479	0.65066	0.631729	0.550378
ADAMTS17	0.770276	0.461006	0.10504	-0.119612	-0.0247304	-0.427315	0.457342	0.206518	0.35263	0.513071	0.0920406	0.68697
ADAMTS18	0.833222	0.501026	0.927778	1.42794	0.338925	0.279101	0.551394	0.64271	0.0952667	-0.654739	0.795332	0.238415
ADAMTS19	0.564136	0.54385	0.618564	0.748709	2.04302	1.20018	0.884436	0.824915	1.28101	0.758229	0.130006	0.799525
ADAMTS2	0.381388	0.612697	0.704887	0.996385	0.826949	1.04855	0.0385971	0.433518	1.05075	0.408857	0.401227	0.470177
ADAMTS20	0.538784	0.487158	-0.185436	1.45414	1.37208	0.447212	0.319789	0.959055	0.429748	0.78402	0.593268	0.214349
ADAMTS3	-0.0797584	0.456357	-0.191706	0.812325	-0.55377	-0.366587	-0.377975	-0.0817232	0.507747	0.544432	0.347108	0.823847
ADAMTS4	0.457156	0.692737	0.0156051	0.884508	-0.247307	-0.996627	0.0755145	1.0163	-0.00295344	-0.547013	-0.74138	1.08481
ADAMTS5	0.127041	0.757688	1.02791	-0.134274	0.388042	0.913043	0.743591	0.816658	0.987279	0.605162	0.121155	0.528743
ADAMTS6	0.0257318	0.241567	0.69551	-0.294476	-0.594923	0.332292	-0.744158	-0.21284	-0.0172917	0.31384	0.413499	0.225793
ADAMTS7	-0.552817	-1.20333	-1.12897	0.091348	-0.541027	-0.516171	0.620684	0.672659	-0.551222	-0.0887196	-0.5701	0.359869
ADAMTS8	0.600197	0.506194	0.452682	1.36291	0.188287	0.875008	-1.3339	0.474945	0.106892	-0.602419	-0.0326031	-1.56608
ADAMTS9	1.48717	0.523724	0.132421	-0.0075037	-0.0732304	1.26649	-0.288522	0.0726209	0.359768	-0.300267	1.02493	0.249915
ADAMTSL1	1.00366	0.839103	0.979561	1.10381	0.681897	0.422394	0.143385	-0.819301	0.57229	1.02162	-0.135337	0.388867
ADAMTSL2	0.370644	0.34894	0.520443	0.836351	0.734845	0.0590667	-0.0334712	0.513426	0.0114826	0.222345	-0.148995	-0.0535468
ADAMTSL3	0.33176	0.304069	0.636907	0.573793	0.885523	0.428318	0.60483	0.633563	0.332054	1.02582	0.747151	0.227456
ADAMTSL4	-0.175805	0.0864069	0.111408	0.350064	-0.14612	0.475912	-0.491884	-0.18007	0.136158	0.280997	0.915764	-0.490218
ADAMTSL5	0.290915	0.311876	-0.729778	0.385461	-0.110236	0.173413	0.512982	1.69336	-0.891909	-0.458993	-0.843225	-0.210142
ADAP1	0.330331	1.07226	-0.068898	-0.42603	0.298175	-1.09439	0.209172	-0.889334	-1.4147	-3.16246	-1.65271	1.08402
ADAP2	-0.194232	-0.345233	-0.00102162	-0.275061	-0.737979	0.00869656	-0.745562	0.0224841	0.605148	-0.0352479	0.0883571	0.361319
ADAR	0.0651401	-0.291709	-0.30124	-0.103283	-0.457008	-1.08865	0.193348	-0.181318	0.369059	-1.38695	0.339015	0.49565
ADARB1	1.12922	1.13711	0.864114	0.525845	1.76981	0.313438	1.46498	1.25567	0.517996	0.429324	0.374092	0.478123
ADARB2	0.976697	1.17103	0.919005	0.400396	-0.104462	1.13042	0.277586	0.787486	0.260199	0.711524	-0.27472	0.243917
ADAT1	-0.20241	-0.167131	0.849374	0.614404	-0.0162458	0.501078	-0.0514694	-0.358299	0.5665	-0.0208852	0.460148	0.109016
ADAT2	-1.63563	-2.0679	-1.34562	-0.978684	-1.44124	-2.28208	-1.96162	-1.36697	-3.38787	-2.20666	-2.18372	-1.61993
ADAT3	-1.23076	-1.46812	-1.16797	-0.520798	-1.00308	-1.63273	-0.830268	0.968283	-2.80444	-1.83009	-3.80972	-0.600342
ADCK1	0.464133	0.420415	-0.00582593	0.726412	-0.169184	0.000268515	0.152701	0.620094	0.191868	0.499002	0.297113	-0.180666
ADCK2	-1.24875	-0.51744	-0.119738	-0.630265	0.053395	0.954325	0.233089	0.52853	0.371738	0.15222	-0.873914	0.408342
ADCK5	0.806311	0.611788	0.810076	0.516465	0.621731	0.395431	1.0477	-0.25157	0.0760565	0.00212075	0.739606	0.543768
ADCY1	0.256036	0.638277	-0.010534	0.0290438	0.160866	-0.698173	0.307951	-0.0166766	0.835682	0.185472	-0.0700432	0.0948722
ADCY10	0.235531	-0.224758	-0.302423	0.0306473	1.08544	-0.636178	1.02859	0.111863	0.162976	0.26161	0.234334	-0.76272
ADCY2	0.864222	1.26402	0.721993	0.761102	0.436756	0.119732	1.31611	0.47896	0.179593	0.489473	0.201211	0.127425
ADCY3	-0.0976813	-0.544423	0.446082	-0.158198	-0.286835	-0.0675828	-0.11013	0.512762	0.123786	-0.01313	0.0117102	-0.228944
ADCY4	-0.460174	-0.321444	0.232586	-0.554231	0.299083	-1.02886	0.581064	-0.110491	-0.983911	-0.906339	-1.08418	0.0668828
ADCY5	0.167075	-0.0304166	-0.46253	0.109323	0.00418125	0.378824	-0.25362	0.463856	-0.0742124	-0.744727	-0.279466	-0.475193
ADCY6	-0.0150004	-0.0154319	1.51103	0.950351	0.792531	-0.32845	-0.0250308	-0.487593	-0.305353	0.382596	-0.0472596	0.306278
ADCY7	0.581055	1.24808	1.28253	0.852255	0.939559	0.818753	-0.321048	-0.0822736	0.480404	0.420802	-0.147208	0.945016
ADCY8	1.12891	0.840843	1.34185	0.718997	-0.493443	0.206525	1.65765	-0.14766	0.499317	1.11243	0.500311	0.537542
ADCY9	0.73373	0.861723	0.634459	1.68688	0.585518	0.284105	-0.280677	0.58906	0.60458	0.16471	0.332057	-0.763885
ADCYAP1	0.98991	1.60602	1.20922	0.938953	0.297046	0.720521	0.352372	0.390601	0.435655	0.44062	0.64576	0.605021
ADCYAP1R1	0.425108	0.36581	0.858477	0.380824	-0.768244	-0.496214	-0.734238	0.312879	-0.850817	0.603619	1.28444	-0.0723106
ADD1	0.335192	0.539539	0.50276	1.3774	0.568097	1.6309	0.144533	0.210825	0.763121	0.027066	0.905175	0.0974167
ADD2	-1.10415	-0.797475	-1.17237	-1.00132	-0.459892	-0.480894	-1.27412	-0.866459	-0.690047	-0.752422	0.235166	0.38908
ADD3	0.505075	0.988016	-0.383989	-0.207306	-0.882003	-0.212951	-0.312947	0.120831	0.147444	0.617375	0.257214	0.521678
ADGB	0.756194	1.22214	-0.405796	0.974272	0.775836	0.362871	1.39085	0.127371	0.633977	0.342825	0.914649	-0.0176397
ADGRA1	0.733321	0.413634	0.438024	0.694474	-0.255433	0.206729	0.629397	-0.33703	0.638377	0.298925	0.307966	-0.173648
ADGRA2	0.462804	0.109473	-0.0688292	0.237741	-0.266218	0.449214	0.234554	-0.0597064	0.146378	0.545528	0.74683	-0.13299
ADGRA3	0.502059	0.157366	0.104097	0.264547	0.192401	-0.0629745	-0.458185	-0.45392	0.908009	0.980907	0.362822	0.431157
ADGRB1	0.819626	1.07359	0.0713098	0.350667	0.46948	0.628254	1.12216	-0.308813	1.04372	1.15019	0.0231342	2.5337
ADGRB2	-0.240055	0.154371	-0.608584	-0.162717	1.19204	-0.252132	0.203948	-0.0402151	0.466009	1.04562	-0.118884	-0.297776
ADGRB3	0.732095	0.620436	-0.154573	0.0935819	0.517367	0.869044	1.51768	1.47287	0.450265	0.0207089	0.736108	0.848951
ADGRD1	0.809863	0.6583	0.204304	-0.95885	-0.00764231	1.18259	0.70838	-0.140876	0.372775	0.845265	0.863045	0.46324
ADGRE1	0.724734	-0.0116091	-0.286472	-0.012736	0.717323	0.230261	1.07751	1.45798	0.541583	-0.253606	0.201984	0.481265
ADGRE2	0.603366	0.446541	0.474655	0.267036	-0.453157	-0.52475	1.1245	0.306096	0.615162	0.328004	0.915027	-0.156488
ADGRE3	0.334686	-0.166274	0.609626	0.187648	-0.422731	-0.539458	0.400962	-0.16738	0.0811789	0.386623	-0.330143	-0.199731
ADGRE5	-0.0781662	0.221853	-1.24621	-1.00061	-0.0822191	0.305717	1.19637	0.711609	0.782581	-0.47313	-0.318495	0.615
ADGRF1	0.378084	0.585454	0.026201	0.0622507	-0.247122	0.200458	-0.0916935	-0.443681	0.37651	-0.165833	0.150521	-0.214563
ADGRF2	0.158094	1.13106	0.0163393	0.0505088	-1.46693	0.279857	-0.139724	0.0201206	0.547372	0.540965	0.609625	0.558197
ADGRF3	0.463596	0.335774	0.455074	0.90091	0.350418	-0.95318	0.541308	0.111814	0.176763	0.446883	-0.336723	0.404532
ADGRF4	0.238177	0.521542	0.109932	0.24349	0.458209	0.472685	-0.0332447	0.80497	0.00441615	0.684704	1.12482	0.436601
ADGRF5	0.212418	0.304547	0.428096	0.700945	0.270149	0.862017	0.246014	-0.0453632	0.00180511	-0.432733	1.3964	1.60574
ADGRG1	0.661354	0.760986	0.138798	0.794403	0.233432	0.941395	0.159254	-0.137236	-0.163516	-0.0114636	0.00301333	0.190866
ADGRG2	-0.599458	0.504402	0.153357	0.548797	0.321726	0.298915	-0.408694	0.483396	0.429787	0.098494	1.16951	0.44051
ADGRG3	0.869001	0.748312	0.552453	-0.376249	0.38284	0.469314	0.77305	-0.659631	-0.291838	-1.15371	1.16064	0.623287
ADGRG4	0.262762	0.589558	1.29114	0.249812	3.02616	2.29779	0.884255	0.872736	1.26374	-0.00914175	1.10675	1.39707
ADGRG5	0.36767	0.934336	-0.0471342	-0.660711	0.438953	1.26691	0.226551	-0.563033	0.612091	1.12543	0.0373921	-0.708305
ADGRG6	0.12469	0.549901	0.662619	0.816595	1.43736	-0.358069	0.0595245	0.978466	0.603074	1.34155	0.140151	0.590948
ADGRG7	0.799539	0.860477	0.790138	-0.0309272	1.75705	-0.412587	2.05521	0.963329	0.158579	0.903892	0.396026	-0.0123374
ADGRL1	1.2661	1.07281	0.592741	0.8936	1.25757	0.583561	1.54501	1.21099	0.156172	0.159055	0.508933	1.11268
ADGRL2	0.451406	1.30485	0.0169911	0.21938	-0.386781	-0.385216	-0.859304	0.871166	0.275523	0.0342284	2.11661	3.3984
ADGRL3	0.146136	-0.160846	-0.401176	-0.612606	0.00725006	-0.317232	0.380034	-0.928689	0.706871	0.501753	0.627815	0.605348
ADGRL4	0.911144	0.442827	0.329323	0.893233	1.50182	0.108538	0.39456	0.508958	0.799265	0.816387	0.676393	0.342015
ADGRV1	0.156355	-0.206631	0.225994	0.39023	0.973312	2.38644	0.374659	-0.00641289	0.62717	0.902617	0.46461	-0.138012
ADH1A	0.399081	0.386883	0.314501	0.788351	-0.12598	0.226747	0.876132	-0.187334	0.819957	-0.570164	0.0308091	0.198585
ADH1B	0.561427	0.747611	0.852564	0.623207	0.230952	0.71517	0.669485	0.075033	0.780723	1.21441	0.0516638	0.348767
ADH1C	0.625114	1.10322	0.93457	0.354649	0.455285	-0.20244	-0.704372	0.065773	0.373127	-0.00655373	0.0998576	0.786021
ADH4	0.869001	0.8939	-0.157881	0.568579	-0.398132	0.103329	0.754387	0.445789	0.211131	1.46845	0.711261	0.175727
ADH5	0.0242751	-0.95249	-0.749468	-0.914439	-0.283944	-0.554921	-1.2548	-0.352823	0.215103	-0.891285	0.029303	-0.234701
ADH6	1.00305	0.573352	0.437942	-0.0292006	-0.210169	0.612669	-0.136538	-0.459554	1.00128	0.369265	-0.725023	0.245608
ADH7	0.799845	0.497754	1.40543	0.0781449	0.453027	0.813524	-0.440683	-0.693401	0.584474	0.495356	0.649353	-0.939569
ADHFE1	0.199829	0.0299117	0.0315498	0.429243	-0.361859	-0.266486	-0.696852	-0.265515	0.589599	-0.200392	0.806375	0.828467
ADI1	0.202356	0.472277	0.344317	0.429452	1.2618	0.764439	0.810224	0.692652	0.465227	0.700429	0.0648757	0.490974
ADIG	0.892846	1.21331	1.18815	-0.0155683	1.55249	0.949545	0.25678	0.581322	-0.0852238	-0.248439	-0.014038	0.635185
ADIPOQ	0.1253	0.396943	0.328504	0.499409	0.224137	-0.217092	-0.00811972	-0.0121923	0.463975	0.730671	0.0453236	-0.0657859
ADIPOR1	0.680828	0.496118	0.147326	-0.767427	-0.670191	0.126371	-0.19097	-0.425046	-2.04284	-1.99152	-4.19887	-2.72557
ADIPOR2	0.962641	0.897952	0.853857	1.94071	0.961154	0.326899	0.697373	0.601283	1.34193	0.661352	0.866619	0.159565
ADIRF	-0.516527	-0.19188	-0.849514	-1.03868	0.171209	0.130967	0.427204	0.0276969	-0.397708	0.25677	0.0853789	0.223319
ADISSP	0.610266	0.743222	0.701367	-0.441777	0.133484	0.701137	1.39734	1.0439	-0.590925	-0.205648	-0.275628	-0.00459026
ADK	-0.0307612	0.934258	-0.246129	0.508657	0.591244	1.28454	-0.72385	0.111021	0.330372	-0.43951	0.489381	-0.985171
ADM	-0.0925239	0.038178	1.21455	0.702491	0.0735479	-0.393917	1.31112	-0.532128	0.537241	1.02558	0.0179126	-0.145781
ADM2	1.02377	0.0481167	-0.464675	-0.0155709	0.395462	0.632748	0.642472	0.183595	0.336983	0.666765	0.73486	0.578026
ADM5	0.210854	0.209201	0.138787	-0.906029	0.213168	-0.363645	0.685701	0.402387	-0.11108	-0.0285531	0.732421	0.00150798
ADNP	-1.0845	0.00263802	-0.314605	0.592972	-0.864199	-0.0461695	0.815901	-1.87025	-0.316658	-0.420765	-0.48291	0.55777
ADNP2	0.809608	0.608386	-0.209801	-0.0679018	1.45224	0.555167	0.698581	-1.75437	-1.07451	1.17855	0.0218066	-0.239136
ADO	0.541365	0.212998	-0.0313957	0.546203	0.0158334	-0.891961	-1.04376	0.928604	0.400548	1.4264	0.434998	0.434057
ADORA1	0.689824	-0.362347	0.0159048	0.158326	-0.577543	-0.392202	-0.593302	0.217462	-0.390471	-0.680329	0.144725	-0.500396
ADORA2A	0.0212977	0.393352	0.0688402	0.595775	-0.24863	0.407728	-1.51174	-0.751017	0.526288	0.630237	0.551063	0.44567
ADORA2B	0.25508	0.653989	0.919995	1.13735	1.04735	0.0846716	-0.206794	0.40781	-0.523116	-0.674804	0.264986	0.342939
ADORA3	-0.0296699	-0.0373766	0.116392	0.142546	-1.04363	-0.840363	-0.675563	-0.380797	0.26368	0.103573	-0.211979	0.847799
ADPGK	0.241864	0.778983	0.0926679	0.302289	-0.198757	1.26504	0.975046	1.31751	0.386485	0.599525	0.000779211	-0.70259
ADPRH	0.761127	0.715434	0.325394	0.823932	0.821142	0.239289	1.19063	1.10284	0.527853	1.01303	0.883051	0.264429
ADPRHL1	0.933302	1.08938	0.847724	0.510937	0.667823	1.03859	-0.711876	0.438747	-0.150334	-0.135523	-0.161051	-0.534924
ADPRM	0.805033	0.823573	0.613229	0.24487	-0.0944741	-0.0163751	-0.238193	0.45997	-0.04757	0.733781	0.508612	0.752843
ADPRS	-0.347342	0.0963612	0.229252	0.394579	0.434114	0.0245027	-0.116758	0.680122	0.339388	0.00261956	0.359135	0.942642
ADRA1A	1.31711	0.822716	0.54808	1.02929	0.855157	0.211489	0.0904022	1.06058	-0.20099	0.185788	0.0359807	-0.225132
ADRA1B	0.869283	0.712552	1.08546	0.441976	1.69636	0.675133	0.232863	0.869321	-0.370444	0.291986	-0.189345	0.84045
ADRA1D	0.654326	0.849777	-0.296208	0.365365	0.0973926	0.911307	1.39809	0.913241	0.0727218	-0.240767	-0.376187	-0.495691
ADRA2A	0.940867	0.437373	1.28407	0.288159	0.126004	0.962353	1.29678	0.854395	0.381165	0.722417	0.384303	0.641411
ADRA2B	0.328892	0.762362	1.33872	0.34726	1.22251	0.1316	0.0344901	0.355439	0.136167	-0.0993469	-0.107561	-0.566965
ADRA2C	0.951115	0.461214	0.607234	0.793041	0.4126	0.494153	-0.246504	-0.203937	0.56738	0.752883	-0.00773748	-0.232735
ADRB1	1.07414	1.15412	1.06927	1.25221	0.499462	0.381561	-0.0106262	1.15806	0.588562	0.907225	-0.428149	0.668932
ADRB2	0.316273	0.39993	1.09226	-0.138531	0.580981	1.23907	-1.10839	0.405139	0.15247	0.0864094	-0.735801	1.92118
ADRB3	0.442384	0.605036	0.840712	0.0648915	0.164293	0.580762	0.178551	0.231384	0.300438	0.338866	-0.0436687	-0.646199
ADRM1	-0.245882	0.0972675	-1.89351	-0.765488	-0.86926	-0.746543	-0.82358	-0.432904	-1.67964	-1.05435	-0.718367	-0.0923822
ADSL	-0.14984	-0.455917	-1.08175	-0.934614	-1.17842	-1.30082	0.0867784	-1.47629	-2.37416	-2.12564	-2.9484	-1.92271
ADSS1	0.740682	0.47664	0.541425	0.660805	0.133384	0.808234	1.19999	0.312118	0.792654	0.481599	0.913779	1.18114
ADSS2	0.0521471	0.842168	-0.999886	-1.95296	-0.590265	-1.23578	0.144095	-0.750726	-2.06338	-0.287852	-1.04374	0.989295
ADTRP	0.551077	0.988275	0.0912987	-0.743689	-0.591778	0.555862	-0.504045	0.146345	0.172847	0.0834479	-0.16909	-1.7055
AEBP1	-0.0329361	0.740391	-0.536725	0.381453	-0.454548	-0.0385565	0.232274	1.01975	0.785163	0.9544	0.175665	-0.0815077
AEBP2	-0.0822297	0.393004	0.172063	1.84954	0.621549	-0.582394	1.81392	1.99868	0.26961	1.08662	0.668319	1.12198
AEN	0.917176	0.535956	1.38932	0.639557	1.23604	0.877051	0.350938	1.41103	-0.19436	-0.163551	0.169655	0.320806
AFAP1	-0.140946	0.293645	-0.319995	0.775146	0.410201	0.33793	-1.70724	0.584673	0.551538	1.37327	-0.218427	-0.440721
AFAP1L1	0.678707	0.42384	0.453122	0.180736	-0.157084	0.346754	-0.359814	0.507533	-0.0310295	-0.354667	0.167513	1.09739
AFAP1L2	0.581131	0.318322	-0.0954523	0.326135	0.352575	0.554922	0.175259	0.183628	0.226016	0.704903	0.121136	-0.319179
AFDN	-0.00010599	1.05694	0.186052	0.635967	-0.340567	-0.191287	0.816626	2.10213	-0.392349	0.882598	0.46045	1.63446
AFF1	-0.659439	-0.760805	-0.396749	-0.406013	-0.00487394	0.324755	0.357567	1.14332	-0.0425591	-0.831271	1.52997	3.33017
AFF2	1.00353	0.621734	0.593813	0.81953	1.75186	2.71061	0.526858	0.0181455	0.405672	1.40741	0.472193	1.57006
AFF3	-0.424267	-0.608647	0.568981	1.15566	0.512125	1.15706	0.667462	-1.19226	-0.649053	0.00714693	-0.379099	-0.957636
AFF4	-0.0813071	0.450696	0.625906	1.16221	1.63381	0.324223	1.46574	0.976215	0.59308	0.0652131	0.688892	-0.802209
AFG1L	0.928344	1.37177	0.377834	0.838552	1.26489	1.43307	0.873082	-1.01146	1.42449	0.468625	1.68109	0.330941
AFG2A	-2.81361	-4.05941	-2.31052	-1.93643	-1.16562	-1.90623	-1.7304	-1.89136	-2.38413	-3.45482	-1.89006	-2.88379
AFG2B	-1.18384	-2.39837	-2.32109	-1.23802	-2.73823	-1.5995	1.63787	-0.205187	-2.70078	-1.57923	-2.6156	-2.96566
AFG3L2	-1.06737	-1.11298	-1.99262	-3.06361	-1.34484	-1.39787	-0.805883	-0.984913	-1.89263	-2.00295	-1.47369	-3.66518
AFM	0.473512	0.501286	0.694575	0.283684	0.174516	0.780862	0.187052	1.01725	0.407941	0.754292	1.53784	0.882569
AFMID	0.143774	0.118898	-0.629072	0.623496	0.1676	1.00016	1.00916	-0.519404	-0.500468	-0.143576	-0.620928	-0.598238
AFP	-0.359992	0.328453	0.450262	0.538815	1.53015	0.979654	-0.120125	0.238087	-0.114776	0.0127681	0.781339	0.330742
AFTPH	-1.01677	-0.606076	0.18652	0.0799418	-0.919748	0.156725	-0.73768	0.379998	-0.505983	-0.607877	0.87666	-0.0963624
AGA	0.819831	0.981445	0.428426	0.934552	-0.608573	0.978939	0.162621	0.688119	0.437532	0.585165	-0.0913161	-0.18386
AGAP1	-0.10785	0.540085	0.333454	0.711294	0.360277	0.804761	1.62488	-0.0971997	-0.777747	-0.261211	0.541968	0.073109
AGAP11	-0.433825	-0.197489	0.0921696	-0.553602	-0.0025189	0.178581	-2.34197	0.231239	-0.944169	-0.683617	0.0607497	-1.84637
AGAP2	-0.506892	-0.766285	0.603494	0.221392	0.0901138	0.150801	0.036453	-0.462241	1.03815	0.75937	0.232954	0.363891
AGAP3	0.383142	-0.0235527	-0.261915	0.497181	0.242828	0.20152	-0.630024	0.321249	-0.0670149	0.9884	0.908654	0.381291
AGAP4	-2.91175	-2.88219	-2.28951	-2.77069	-2.4128	-2.60053	-3.2224	-3.3208	-0.648231	-0.382538	-0.693955	-0.219948
AGAP5	-2.23917	-1.1086	-2.99457	-2.50606	-1.44461	-2.01048	-1.6218	-1.5307	-1.10944	-0.785214	-0.735348	0.811096
AGAP6	-0.693583	-1.24694	-1.9451	-0.395166	-0.773789	0.214328	0.144925	-0.0726737	-0.46671	-0.423517	0.563978	-0.1991
AGAP9	-1.1548	-0.707566	-1.67395	-0.958457	-1.09621	-2.16422	0.787817	-1.21776	-0.329664	-0.534755	-1.4881	-0.627947
AGBL1	0.0926519	-0.505234	0.371558	0.600806	-0.0581344	0.272809	1.78478	1.14877	0.150342	0.939369	0.593287	0.459431
AGBL2	0.581949	-0.171312	0.848714	0.725443	1.37657	1.05462	1.58261	-0.452054	0.528479	-0.287472	0.962111	0.681881
AGBL3	0.221997	0.984016	0.974556	1.14353	0.802633	0.385197	-0.0529491	-1.26506	0.731866	0.786279	1.05715	0.183432
AGBL4	0.128592	0.331881	0.624284	0.207283	0.155543	-0.470477	0.0558252	0.418964	0.0721468	0.015383	0.0349509	-0.842025
AGBL5	-0.145035	-0.443945	0.654287	0.30334	-0.0501942	-0.382458	0.552074	0.546289	0.0811124	-0.155051	0.390732	0.134973
AGER	1.15414	0.415894	0.0104708	0.0383896	0.746499	-0.388995	-0.286948	-0.134599	1.87517	0.806679	1.11312	0.643899
AGFG1	0.497382	0.161025	0.317421	1.73514	-0.183	0.697398	0.446636	1.38869	0.219351	-0.111106	-0.08726	-0.100127
AGFG2	0.598893	-0.220291	0.74996	1.15713	0.316685	0.123981	-0.615785	-0.736771	0.0572472	-0.0649644	-0.228052	-0.533204
AGGF1	0.853565	0.707955	0.859632	0.925041	0.448712	0.40256	0.671614	-0.123733	0.734917	0.777332	0.818061	-0.292225
AGK	-0.51116	-0.432934	-0.594531	-0.319393	0.918509	0.0449641	-0.325046	0.976555	-1.88579	-2.02519	-1.51166	-0.411893
AGL	-0.0676701	-0.572912	1.0152	-0.409576	0.0567018	-0.103573	0.00682844	-2.52285	0.190592	0.594403	1.49826	0.493575
AGMAT	0.303182	-0.277685	-0.713635	-0.513515	-0.357544	-0.520951	0.721607	-0.968125	0.081838	0.168184	0.0219849	-1.00411
AGMO	0.417876	0.827235	0.593291	1.61575	0.184981	0.927485	-0.0753713	-0.590683	0.583516	0.168674	0.183988	0.430844
AGO1	-0.921983	0.185503	0.0599659	-0.390292	0.0961224	-1.17103	-0.75737	-1.4167	0.0425648	-1.13888	-0.349317	-0.786544
AGO2	0.113562	-0.111503	-0.161516	-0.115826	-1.0401	-0.19796	-0.831446	-0.154212	0.533916	-0.222246	-0.355576	0.169274
AGO3	-0.893257	-0.72385	0.32934	-0.153526	0.739704	1.03409	0.709618	0.635651	0.40573	-0.211979	0.547111	-0.224583
AGO4	0.0770725	-0.514713	0.477597	1.11809	-0.146307	0.0229666	-0.11857	-0.360392	0.492198	0.137488	0.0812037	-0.670351
AGPAT1	0.160944	0.0579775	0.336251	-0.604693	-0.106171	0.475932	-0.648958	-1.0194	-3.25878	-1.12049	-3.35741	0.0466407
AGPAT2	-0.0856952	-0.00470629	0.102171	0.615268	0.679618	0.140669	-0.767818	-0.251346	0.0914001	0.821554	0.236263	0.56809
AGPAT3	0.46766	0.812328	0.505565	0.124968	0.420605	0.489026	0.5682	0.904709	-0.0175049	0.734004	-0.498151	-0.17071
AGPAT4	1.54582	1.04507	0.296967	0.974141	-0.248963	0.752979	1.98379	0.716126	0.0485398	0.504706	-0.0112565	1.00381
AGPAT5	0.488284	0.182778	1.01729	1.95342	0.328783	-0.314531	0.983698	-1.14057	0.106049	1.07087	0.799889	1.02459
AGPS	-0.0581375	-0.330482	-0.555591	0.162634	-0.188444	0.198661	-0.218723	-1.34026	0.588308	0.212726	1.42648	0.631205
AGR2	1.11435	0.484483	0.817144	0.380273	-0.385611	-0.722133	0.368227	1.45976	1.22967	0.596192	1.04238	-0.357224
AGR3	0.865526	0.327902	0.985473	0.407182	0.251397	0.700483	-1.6604	-0.0449423	0.747689	0.78024	1.25152	0.578211
AGRN	0.657725	0.238261	0.70266	0.750936	0.57957	0.552308	-0.437437	-1.09791	0.225039	-0.280023	0.0227594	0.0773593
AGRP	0.566257	0.82495	0.645459	0.23145	-0.067363	0.339257	0.248445	-0.700492	0.279544	0.973794	0.373619	0.35124
AGT	-0.205144	-0.559563	-0.871707	-0.470912	-0.795161	-1.60961	0.991852	-1.47516	0.0293922	-0.758551	-0.269652	0.766944
AGTPBP1	-0.346626	0.389259	-0.0334968	0.132304	0.313076	-0.558454	1.12225	0.974596	0.250785	1.08604	0.378479	0.915178
AGTR1	-0.23042	-0.0388621	0.925083	0.79236	-0.847303	-0.176955	0.387689	1.13134	1.21332	0.0637323	0.622124	0.149813
AGTR2	-0.690031	-0.702762	-0.965648	-0.207253	-0.637104	0.531166	1.1166	1.42787	0.356013	0.487929	0.695397	0.858546
AGTRAP	-0.123491	-0.372995	0.923488	-0.0188303	-0.467473	-0.0326409	-0.633662	0.497787	0.376647	0.805964	-0.201012	-0.129466
AGXT	0.354462	0.243196	0.115948	0.130231	-0.478179	1.55038	0.358322	-0.512896	0.4177	0.59919	-0.191198	-0.0299783
AGXT2	-0.263822	-0.0476321	1.01985	0.401156	-1.14033	-0.465738	-0.487957	-0.00801558	0.693063	0.356604	0.929209	1.28278
AHCTF1	-1.61153	-1.05632	-2.41855	-1.21449	-0.295785	-0.0408238	-1.03987	0.939871	-2.31431	-0.45349	-0.198686	-0.0242638
AHCY	-0.706617	-0.177155	-0.0877577	0.240765	-0.325445	0.249543	-0.369012	0.598093	-0.881973	-1.92752	-0.582278	-0.380899
AHCYL1	-3.11569	-4.49519	-4.63826	-4.42003	-1.90713	-3.23662	-2.27085	-0.409122	0.702881	2.45156	0.881501	2.38444
AHCYL2	-0.573876	0.145955	0.386653	-0.355969	0.20226	0.704078	-0.575848	-0.349556	0.299171	0.787398	0.189678	0.484193
AHDC1	0.606816	0.638277	0.551408	0.101437	0.212039	0.365833	1.10528	0.590242	1.41101	0.9578	0.378422	0.978478
AHI1	-0.321529	0.0440212	0.328949	-0.160836	-0.317164	1.61633	1.30267	0.349789	-0.169501	-0.972147	0.528164	0.541409
AHNAK	0.627772	0.615216	0.234302	0.420125	0.182097	0.431749	0.716594	1.46591	-0.191504	0.12702	0.21465	0.749289
AHNAK2	-0.0241548	-0.14464	0.0763066	-0.204136	-0.314757	0.00247664	0.813833	-0.587575	0.86723	0.517008	1.84161	1.12614
AHR	0.66166	0.803187	1.08841	1.13297	1.01888	1.53479	-1.76415	-1.09556	0.118854	-0.425306	0.401643	0.762026
AHRR	1.23035	0.849777	0.670154	0.962036	0.893729	0.669516	1.74522	0.0133375	-0.18947	0.361704	0.943258	0.0231859
AHSA1	0.296113	0.122025	-0.154097	0.6596	0.435626	-0.126088	1.6048	0.187756	0.087285	0.531481	-0.286538	-0.373281
AHSA2P	0.0786673	0.338225	-0.229244	-0.0980196	1.04985	-0.0919804	-0.359371	0.775976	0.467378	0.943239	0.504055	-0.889632
AHSG	0.792102	0.440594	-0.160133	0.320892	0.627719	-0.852517	0.527372	4.13107	1.07351	0.755948	1.12798	-0.107201
AHSP	-0.602116	0.140172	-0.407171	-0.223603	0.038053	0.539868	-0.938333	-0.296462	0.398807	-0.425776	0.562862	1.16049
AICDA	0.520383	0.203511	0.235589	1.09747	0.314467	0.566872	0.699215	0.759528	0.419108	0.186119	0.69742	0.742224
AIDA	0.286318	0.362349	-0.360943	0.399767	-0.687915	-0.336192	0.218941	0.650173	0.587291	0.459253	0.147526	0.463155
AIF1	0.898903	0.637784	0.603989	-0.00712117	-0.606033	-0.509369	1.46483	-0.862606	0.096718	-0.649281	-0.108771	0.0770892
AIF1L	0.309802	0.366766	-0.218574	0.396649	0.509544	0.768933	-0.822356	-0.191658	0.972767	0.161498	-0.168615	-0.887883
AIFM1	-2.26805	-1.96558	-0.980278	-2.11611	-0.407992	0.400864	-0.912649	0.220489	-2.3503	-1.81132	-1.42572	-1.60294
AIFM2	0.0055267	0.231795	0.608691	0.290261	0.243977	0.859831	-0.20992	0.0475606	-0.810605	-0.410767	0.112971	1.51804
AIFM3	0.382022	-0.279996	0.0236407	0.325726	0.986741	-0.504426	1.3223	0.0882754	0.0308297	0.881077	0.0136513	0.364616
AIG1	0.373466	0.798305	0.404281	0.313252	0.325557	0.73196	-0.335412	0.0737541	0.170297	0.0140901	0.383414	2.08834
AIM2	0.0858921	0.689101	0.567056	1.29877	0.502668	0.0632072	0.639377	1.40828	0.515355	0.508889	0.098795	0.159991
AIMP1	0.406787	1.36154	0.648402	0.450492	0.848302	0.843082	1.0293	1.18431	0.162743	-0.364084	1.15977	1.86389
AIMP2	0.178286	-0.849207	-0.149468	-1.18289	-0.323892	-0.712063	-0.426781	-0.395985	-0.366043	-0.441098	-1.07751	0.773526
AIP	-1.12723	-0.989809	-1.43263	-1.38118	-1.01113	-0.0545873	-0.958989	-2.01824	-0.0306637	1.44243	0.0714977	2.59881
AIPL1	0.779962	0.525775	1.09619	0.114631	0.425122	-0.673926	-0.194051	-0.178077	0.162358	0.779166	0.0138536	1.3756
AIRE	0.269174	0.896575	0.205143	-0.32631	1.80239	0.0595467	-0.0454448	0.408798	-0.0059048	0.150804	0.737961	0.483426
AIRIM	-2.50028	-4.10798	-2.65906	-2.26823	-2.91082	-3.71195	-1.43718	-3.42262	-3.15493	-4.52403	-2.02582	-6.39205
AJAP1	0.380757	0.17455	0.224014	0.340239	-0.522498	0.306922	0.634062	0.218951	0.532919	0.600442	-0.267894	0.0637555
AJM1	0.217731	0.806667	1.38068	0.531531	0.641712	0.0729609	0.966364	0.4426	0.772861	1.27595	-0.308341	0.0730522
AJUBA	0.60196	0.409962	0.0636372	0.937512	0.324085	0.0507837	0.787636	-0.0475486	-1.24803	-0.48201	0.0231802	-0.220589
AK1	0.463878	0.560731	0.303055	0.695181	0.491538	1.24724	-1.10646	-0.195662	0.501879	0.194717	0.888384	1.31419
AK2	0.134938	0.828066	0.463022	-0.286878	1.0336	1.0165	0.271411	-0.509545	2.08525	0.380203	1.27464	1.93454
AK3	0.871506	1.12828	-0.457002	0.878036	0.243534	-0.240004	0.630605	0.651079	0.819449	0.901991	0.633809	1.68876
AK4	-0.243198	-0.504455	-0.620712	-1.40269	-1.19153	-0.223291	-0.42726	-0.0958399	-0.235256	-0.9428	0.113017	0.0059715
AK5	0.592479	-0.327807	-0.0512537	-0.56044	1.75374	0.216922	0.0121282	-0.65934	1.16862	0.720382	0.483463	-0.671587
AK6	-1.68687	-1.11774	-0.381954	-1.77094	-0.540705	-1.90617	-0.554256	-1.61543	-2.08685	-1.71901	-1.49236	-1.51086
AK7	0.977259	0.176562	-0.0672094	0.678648	0.501277	-0.588808	0.882217	1.19159	0.732942	0.561365	0.967008	0.112499
AK8	0.691434	0.294125	0.0248067	0.00335391	-0.391176	0.0275851	-0.462876	0.397822	0.273434	-0.1914	1.20022	-0.352339
AK9	-0.209233	0.6014	0.72411	-0.38031	1.73229	0.443291	-0.113285	-0.525297	0.576495	-0.528961	0.386629	-0.264899
AKAIN1	1.00438	1.2219	0.358669	1.78461	1.29856	-0.107774	0.824357	0.389533	0.941532	1.17806	0.25659	0.176637
AKAP1	-0.238956	0.0318725	-0.218849	-0.308284	-2.03434	-0.342994	-0.938711	-1.26174	0.147211	-0.593315	-0.0885742	-0.814548
AKAP10	0.780218	0.632071	1.09061	0.768255	-0.766167	1.07768	1.53051	1.85412	0.782014	1.03202	0.0453557	-0.365389
AKAP11	-0.347546	-0.0602613	0.846927	-0.309672	-0.330546	0.348388	-0.067248	-0.143301	1.11521	0.46791	0.472892	0.29728
AKAP12	-0.0368334	0.497884	0.470364	-0.308624	-0.754977	-0.832213	-1.09068	0.282768	1.12352	-0.274342	1.03886	-0.0125649
AKAP13	0.249999	0.224918	0.984483	0.95525	0.185001	-0.0215594	2.26494	1.54524	1.05212	1.13037	0.890615	1.0078
AKAP14	-0.282095	-0.358036	0.678432	0.492885	0.653205	0.692455	-0.0234001	1.25494	1.51807	0.297742	0.671533	0.378917
AKAP17A	0.931283	0.461058	-2.61101e-05	-0.241079	0.157801	-0.510962	1.08367	0.899011	-0.737632	-0.743698	-0.369909	-0.140686
AKAP2	0.6876	1.0612	-0.177461	0.2393	0.614815	0.123245	-0.628921	0.099041	0.788058	-0.000728989	1.24378	0.0639261
AKAP3	0.579368	0.450099	1.43018	-0.133962	1.0856	0.481672	0.267696	-0.655519	0.574167	1.59857	0.920038	-0.198342
AKAP4	0.0988391	0.530658	0.418526	-0.0410696	-0.924467	-1.36674	0.851233	1.04991	1.7111	1.01565	1.70553	0.435521
AKAP5	1.50258	0.750026	-0.31774	-0.173213	0.171653	-1.24992	0.304448	0.548976	0.659637	1.23519	0.644607	-1.11166
AKAP6	0.070898	0.200981	0.360429	-0.065735	0.372839	0.499811	0.776825	-1.85276	-0.188961	-0.180886	-1.35875	-0.377766
AKAP7	1.61825	1.00014	0.517555	0.433723	1.24178	1.12691	2.48403	0.418122	0.731338	-0.26365	1.07651	0.551572
AKAP8	1.27847	1.03975	-0.609739	-0.00484694	0.92972	0.202889	1.635	1.40536	0.651032	-0.0597168	-0.325189	-1.14718
AKAP8L	-0.19528	0.337737	-0.747818	-1.1193	-0.517134	-0.520502	0.259256	2.10391	0.220916	-0.742356	0.717237	0.878191
AKAP9	0.42475	0.692425	1.27442	1.29261	0.478251	-0.177256	-0.16882	1.12514	1.20602	0.708795	1.07602	-0.283038
AKIP1	-0.35805	-0.633266	0.112781	-0.604038	-0.344257	-0.808191	0.263031	-0.609575	-0.267645	0.410244	-0.680965	-0.062815
AKIRIN1	-1.16804	-0.643343	-1.2071	-0.00440152	-0.0564548	-0.56687	-2.01884	-1.67639	-1.16549	-0.208914	-0.463074	-0.716294
AKIRIN2	-1.93553	-1.27501	-2.46436	-2.34346	-1.40211	-1.48617	-0.853431	-1.23069	-0.613945	-1.03952	-1.22167	-0.957693
AKNA	0.644742	0.247956	0.986078	0.561819	0.991096	0.391938	-0.0839627	0.370414	0.948123	0.226447	1.21634	0.859271
AKNAD1	-0.0363198	-0.224654	0.0888657	0.353994	-0.529474	-0.100184	0.207466	1.31694	0.386426	0.596483	0.945584	0.290059
AKR1A1	-0.0986754	0.319815	-0.260815	-1.11194	-0.373211	0.0430931	-0.243414	0.584268	0.700084	0.437242	0.359853	-0.357963
AKR1B1	0.555575	0.432231	0.263221	0.918988	0.1453	0.0497113	0.925808	0.308395	-0.149982	0.371949	-0.175806	-0.898544
AKR1B10	0.0813686	0.0719078	0.375257	-0.255017	0.671311	0.292909	-1.06612	0.311487	-0.527967	-0.00811057	0.657692	-0.751703
AKR1B15	0.294207	0.584831	0.323799	0.221837	0.14532	-0.46872	0.801497	0.44961	-1.06238	1.06839	-0.285328	-0.0867531
AKR1C1	0.83289	1.22881	0.13582	0.699452	0.063658	0.577739	-0.693425	-0.147699	0.382006	0.883291	0.296867	-0.255212
AKR1C2	1.13566	-0.408859	0.711405	1.08932	0.673731	-0.206633	-0.473553	0.551194	-0.589634	-0.469461	0.0489485	0.264855
AKR1C3	0.595366	0.929791	0.685087	0.391566	1.51324	0.319791	0.374946	0.884376	0.483416	0.287904	0.975007	1.20758
AKR1C4	1.17024	1.25712	1.69666	1.28672	1.05669	2.15807	0.290632	-0.308109	1.39865	0.890717	0.296602	-0.384785
AKR1D1	0.261822	0.979056	0.854517	1.17565	-0.0262124	2.67241	0.971136	-1.16297	1.1226	0.00859641	1.19638	0.191904
AKR1E2	0.706793	0.730185	1.0548	0.698875	0.862275	1.57193	0.00824776	0.445611	0.575419	0.0657656	0.188441	0.0595479
AKR7A2	-0.165659	-0.101037	0.068139	-0.788937	0.921272	0.855011	-0.170979	-0.658271	0.451458	0.508687	0.0482639	0.478138
AKR7A3	-0.356746	-0.705047	-0.765363	-0.322563	0.538115	0.49113	-0.967701	-0.792995	0.290469	-0.411594	0.184482	-0.533318
AKT1	0.446346	-0.220109	0.352795	0.110324	0.215366	-0.705077	0.67489	0.0668738	-0.523488	0.769503	0.534877	-0.338092
AKT1S1	0.923309	0.269534	1.44289	1.06875	1.05558	-0.255567	1.00826	0.793104	0.239723	-0.44725	0.687682	1.32187
AKT2	0.244262	-0.366061	0.581988	0.719364	-0.0473997	0.356804	0.943489	-0.0663439	-0.446134	0.0211115	0.320295	1.06893
AKT3	0.696571	0.745144	1.05326	0.10057	1.33092	-0.372143	-0.509629	-0.176423	0.222699	0.816365	0.0446088	-1.05919
AKTIP	1.15138	0.704475	1.81557	0.610212	0.520492	0.810521	2.08646	-2.42086	0.528538	1.02291	0.160291	-0.39782
ALAD	0.193261	0.143247	0.0473982	0.327288	0.0241446	1.72321	0.470735	0.033622	1.07727	1.14055	1.79445	2.78388
ALAS1	0.369157	0.461448	-0.0946355	0.167858	-0.570183	0.0697989	0.709377	0.043141	1.62377	2.15384	2.51068	4.31783
ALAS2	1.08156	0.693178	1.58856	0.314992	0.505168	1.75812	0.989723	0.273362	0.548702	0.713828	0.384946	0.251934
ALB	0.830079	-0.24904	0.178118	0.56567	0.527912	0.448499	0.0461617	-0.319027	0.394973	0.00890285	0.606788	-0.558393
ALCAM	0.244415	-0.0420901	0.75227	0.244265	1.73553	-0.32269	0.702069	0.845296	1.23313	1.12771	0.150478	0.365796
ALDH16A1	-1.35685	-0.162352	-0.453179	-0.165932	0.283154	0.602353	0.2736	-0.0621995	-0.56902	-0.378914	-0.763466	-0.376712
ALDH18A1	0.230019	0.389119	0.0876499	0.102569	0.869574	1.98506	0.0418132	-0.399372	0.85129	-0.123489	0.912417	-0.86494
ALDH1A1	0.665366	0.969914	-0.153789	0.977468	1.11605	0.3413	1.29693	-0.784301	0.826627	0.30156	0.580542	1.17928
ALDH1A2	1.05715	0.697073	0.778396	1.21377	0.541684	0.011926	-0.101855	1.29658	0.833198	0.906554	1.69741	0.796056
ALDH1A3	0.39386	0.108307	0.335382	0.719784	0.744987	0.684162	0.143868	0.503454	0.299004	-0.0324161	0.0223243	-0.085886
ALDH1B1	1.14803	1.77036	0.590403	0.814919	-0.759171	0.582294	0.0136382	0.230494	0.220513	0.363896	0.221873	0.0370597
ALDH1L1	-0.0610637	0.272069	-0.0931753	0.671469	0.110398	-0.178324	0.218564	0.000564484	0.604287	-0.0830895	0.512431	0.292788
ALDH1L2	0.241882	0.226489	-0.136354	-0.0191631	1.18764	1.47994	-1.01434	-0.0318455	0.630358	-0.306821	0.515079	-0.0131335
ALDH2	0.251262	0.131447	0.226651	0.214687	0.00326585	-0.687735	-0.0792367	-0.68406	0.643189	-0.0214511	-0.0379997	0.597842
ALDH3A1	0.714026	0.674869	0.197866	-0.201227	0.180646	-0.537987	1.07724	0.557605	-0.394422	0.298225	0.152087	-0.151313
ALDH3A2	0.741908	0.867281	0.341594	1.08319	0.388001	-0.11898	0.419715	0.171632	0.990721	0.586037	0.439915	0.435592
ALDH3B1	-0.713849	-0.783139	-1.32948	-0.380624	-0.867567	-0.552204	0.539828	-1.68739	0.813053	0.386354	0.804087	0.318105
ALDH3B2	-1.19585	-0.394186	-1.44943	-1.70358	-0.356335	-1.67183	-1.11687	-1.28139	-0.129973	-0.236181	-1.01193	-0.489408
ALDH4A1	0.124769	-0.492405	-0.52567	-1.25243	-0.940436	-0.431625	-0.0565276	-0.420663	0.295593	-0.740925	-0.22098	-1.29534
ALDH5A1	0.902021	0.487547	0.194509	0.288089	0.404938	0.248461	-0.145628	0.555776	0.649545	0.374432	1.29538	1.70937
ALDH6A1	-0.365691	-0.417741	-1.12859	0.25288	-0.435071	-0.267719	-0.543656	-1.00016	0.353412	0.150649	0.794329	0.985713
ALDH7A1	-0.0328645	-0.314147	0.148005	0.546308	0.345115	0.753429	0.294815	0.549414	0.118949	1.1605	1.06787	0.807386
ALDH8A1	0.589744	0.487573	1.35764	0.71043	0.355862	0.304696	0.625018	0.85624	0.174044	0.603127	0.687663	0.891837
ALDH9A1	0.358518	0.715694	-0.0442219	-0.0397857	0.407882	-0.1604	0.281195	0.60023	0.892519	1.06398	-0.0699884	-1.68375
ALDOA	-2.30191	-1.98791	-3.64578	-2.73086	-2.19887	-1.84499	-2.29908	-1.20846	-1.44514	-0.381061	-2.5549	-1.01674
ALDOB	0.472873	0.71224	0.0259095	0.491077	0.821001	0.71041	-0.438174	0.26224	-0.154988	0.541345	0.865144	0.842426
ALDOC	-0.359328	0.76592	0.47537	0.439435	-0.229038	0.143263	0.669485	0.429017	0.954793	0.163742	0.838161	0.487932
ALG1	-0.794378	-1.19874	-0.234964	-1.24035	-1.6141	-0.938922	-0.194051	-1.06424	-1.72658	-1.50051	-3.4599	-0.574684
ALG10	-0.194155	-0.0727633	-0.365783	-0.486213	-0.0610762	-0.142291	-0.517373	-0.399901	0.290743	-0.373098	-0.0569278	-0.39583
ALG10B	-0.477297	-0.981862	-0.960918	-0.875872	-0.615247	-0.866387	-0.524711	-0.848101	-0.626697	-1.35749	0.162139	-0.124004
ALG11	-2.38311	-3.18007	-1.82184	-1.55248	-2.71665	-2.08149	-0.415126	0.00160057	-3.02428	-2.89471	-3.75374	-1.0818
ALG12	-1.55443	-1.1904	-1.09592	-1.22757	0.015898	0.386218	-0.99725	-1.89869	1.12841	1.79597	-1.13117	0.757903
ALG13	-3.22584	-3.5304	-2.59235	-1.11005	-1.13469	-2.21998	-2.41067	-3.66044	-2.3767	-3.32777	-2.06648	-2.02676
ALG14	-2.05815	-2.35461	-1.44198	-1.88395	-2.60596	-2.02327	-0.54796	-0.873372	-1.20854	-1.54478	-2.31249	-1.44834
ALG1L1P	-1.74999	-0.870918	-0.855922	-0.604484	0.211555	-1.11381	-1.64247	-0.736431	-1.24345	-0.703592	-1.52955	-2.64384
ALG1L2	-1.92876	-1.06598	-0.607181	-0.955706	-1.09422	-0.82057	-0.997461	-1.18523	-1.04241	-1.70371	-0.431836	-0.271254
ALG2	-4.44898	-3.50937	-4.07451	-3.48833	-3.25561	-3.48725	-1.55802	-2.36533	-3.10369	-2.90858	-5.54917	-4.8547
ALG3	-0.325516	-0.418416	-0.875915	-1.4459	-0.52528	-1.07952	-1.01452	-0.606532	0.412693	0.465516	-0.333017	-0.144034
ALG5	-1.39982	-1.06146	-2.98742	-1.64749	-1.42009	-0.59892	-1.92206	-3.63923	-0.666733	-0.574213	-1.10803	-1.62145
ALG6	-0.979255	-0.867282	-1.77399	-0.549174	-1.13356	-0.658055	-2.14749	-0.335768	-0.940257	-0.179142	-1.21876	0.273612
ALG8	-1.77195	-1.55149	-2.3424	-2.90353	-1.09132	-0.806761	0.586877	-2.5405	-0.752027	-1.57196	-0.226615	-0.0938606
ALG9	-2.11461	-3.26707	-1.51337	-2.90326	-2.537	-1.88455	-1.78647	-2.3213	1.25169	0.257047	0.399279	0.143616
ALK	0.165634	0.798149	1.46519	-0.610693	-0.444709	0.44995	-0.363131	0.892454	-0.66775	0.428698	0.134564	0.270499
ALKAL1	0.24039	0.270475	0.852894	-0.510187	0.179093	0.108497	-0.555872	2.01552	0.537632	0.535865	1.17565	0.905469
ALKAL2	1.04915	0.998611	0.72092	0.500561	1.18091	2.02448	0.601493	-0.00186384	1.31971	-0.0440208	0.519163	0.668391
ALKBH1	-0.262442	0.192055	0.362544	-0.394746	0.167398	-0.100069	-0.549017	-0.000520166	0.706128	0.769033	0.603838	1.11551
ALKBH2	-0.00936772	-0.970617	-0.333883	-0.084086	-0.426784	0.633708	-0.877332	-1.56154	0.971163	0.328322	0.756738	-0.127925
ALKBH3	-0.657063	-0.258909	-0.480515	-0.414659	1.37798	0.484246	-0.535337	-0.237346	0.263672	1.29767	1.07057	0.0438972
ALKBH4	0.384258	0.153495	0.790853	0.576989	-0.0167943	2.94266	-0.528535	0.435574	0.499591	0.624108	0.203764	-0.546524
ALKBH5	-1.0055	-1.35863	-0.329318	-0.6081	-0.621841	-0.548037	-0.38269	1.24963	-0.433069	-1.08578	-1.20774	-0.942099
ALKBH6	0.585629	0.583169	0.738933	0.96442	-0.133336	1.07	0.995022	-0.15395	0.450519	-0.456219	1.18707	0.322611
ALKBH7	-0.306323	0.71089	-2.42644	-1.37363	-0.186087	-0.0371573	1.48129	1.70955	-0.215404	-0.0473358	1.20124	1.29316
ALKBH8	0.226226	-0.204112	-0.109631	0.971652	0.616266	0.920376	0.176739	1.53099	-0.462818	0.03804	-0.171627	0.845937
ALLC	0.584607	0.913663	-0.468717	0.931827	-0.248156	0.383665	0.849497	0.195413	-0.823983	-1.20925	0.76086	0.896699
ALMS1	-0.257893	-0.471707	0.25947	-0.00770021	-0.00138977	-0.212741	-0.50856	-0.44392	0.183553	-0.95253	0.172321	1.70312
ALOX12	-0.433825	1.04821	0.490082	0.96387	0.126246	-0.147555	-0.681512	-0.0762514	-0.155497	0.846271	0.39805	-0.161417
ALOX12B	0.117317	0.0426396	-0.851742	0.030946	-0.16419	-0.264453	1.70264	-2.1225	0.168421	0.232576	0.761314	-0.562871
ALOX15	0.332815	0.969603	0.829436	0.364972	0.681151	0.294503	0.0240868	-0.115704	0.0476343	0.203651	0.210206	0.321047
ALOX15B	0.0236949	0.403077	0.350818	-0.25038	0.367939	1.39744	-0.333605	1.47093	0.12961	0.331359	-0.221188	-0.110061
ALOX5	0.429504	0.374921	-0.271375	0.0355521	0.190667	-0.916657	-0.546163	-1.69602	-0.0887834	0.717139	0.149625	-0.352904
ALOX5AP	-0.222293	0.216833	-0.218739	0.677626	-0.839157	0.080192	-0.964998	-0.0355851	0.806834	0.552596	-0.303197	-0.809786
ALOXE3	0.142696	-0.46537	0.178668	0.167968	0.421089	0.277283	-0.377611	-0.13897	0.0227326	0.561074	0.687568	2.10924
ALPG	0.119302	0.125442	-0.498638	-0.44479	-0.591274	-0.471927	-1.32102	-0.251458	0.182802	-0.355785	0.409679	0.759112
ALPI	-0.550824	-0.112594	-0.323048	0.937172	-0.346556	0.258102	0.0699731	-0.151638	0.402777	1.06533	0.352951	0.30642
ALPK1	-0.441237	-0.487964	-0.608309	0.0611243	-0.128804	-0.439571	0.991595	-0.177373	0.392822	0.408566	0.502882	-0.0143986
ALPK2	0.429887	0.325445	0.729445	1.0523	-0.471667	0.161219	0.0294923	0.667284	0.176827	0.454914	0.751462	-0.110583
ALPK3	0.56705	0.42221	0.845607	1.02814	0.393566	0.313397	2.0161	1.97035	-0.484097	0.181363	1.37747	0.0877079
ALPL	0.414911	0.14418	-0.297638	-0.234004	0.676191	0.799552	0.223879	1.53261	-0.435221	0.208738	0.0223945	-0.193488
ALPP	-0.41085	0.108263	-1.10128	0.261683	0.230831	-0.616507	0.649599	0.470088	0.533662	-0.0671833	0.497436	1.87355
ALS2	0.426744	0.0755073	0.240822	-0.388537	0.502426	0.275179	-0.0126646	-0.26809	0.31453	0.582436	0.0539537	-0.775186
ALS2CL	0.294749	-0.13846	-0.0614041	-0.619523	-1.09605	-0.765601	-0.549681	-0.608539	0.254358	0.362957	0.457557	-0.53464
ALX1	0.020439	0.893277	-0.0363376	-0.913784	0.409052	-0.366668	1.29285	-0.418894	-0.612537	-0.578754	0.997981	0.620686
ALX3	-0.266378	-0.69027	-0.0131025	-0.14188	-0.239323	-0.415345	-0.0178285	-1.14112	0.414786	0.546982	0.4374	0.350515
ALX4	-0.0174794	0.74156	0.0763643	0.417243	1.13407	1.18878	-0.667817	0.527348	1.07171	-0.338427	0.4374	-0.209315
ALYREF	-1.98534	-2.28301	-0.255287	-1.84745	-2.47087	-2.46796	-2.31177	-1.10571	-2.49581	-1.3446	-2.76177	-1.21267
AMACR	0.677276	0.0375469	0.267505	-0.152701	-0.982979	-0.833479	0.226506	0.416827	0.983661	0.461065	0.452849	0.668733
AMBN	-0.23272	-0.291631	-0.0840314	-1.54148	-1.63957	-1.08428	0.516077	0.797475	0.515023	0.129291	1.12312	0.927417
AMBP	0.41854	0.132763	0.792338	0.968089	0.954238	0.852478	0.129222	0.264636	0.849158	0.354904	1.70604	2.388
AMBRA1	-0.360094	-1.69217	-0.793661	-1.05894	1.40337	0.789073	0.998012	0.440997	0.0769308	1.52491	0.329504	0.0254603
AMD1	-0.00546266	-0.303135	-0.661192	-0.408004	-0.605226	-0.858175	0.170896	-0.788543	-4.24981	-2.02022	-2.88638	-2.43431
AMDHD1	0.200187	-0.949451	-0.287737	-0.399751	-0.585104	-0.740436	-0.300595	-0.291073	-0.13854	0.67059	1.03763	0.558694
AMDHD2	1.17957	0.618203	0.482327	0.56795	0.718372	0.237635	0.948713	-0.0545422	0.716767	0.0766769	0.0824328	-1.00996
AMELX	1.06837	1.16124	-0.0717415	0.816805	0.433086	0.161361	-0.560477	0.229636	-0.884535	-0.111341	1.14859	1.48776
AMELY	1.02487	1.47004	0.928218	0.0314569	0.310193	0.503039	-0.489222	-0.301831	0.209769	0.323043	0.599867	1.0258
AMER1	0.728414	0.0671345	0.0278042	0.536273	0.252688	0.574716	-0.335145	0.584835	1.07864	0.649116	0.98015	0.972038
AMER2	0.850728	0.642329	1.16607	1.29751	0.454963	0.723381	-0.201555	0.0485481	0.964611	0.130647	0.711621	2.18856
AMER3	0.141469	0.100059	0.684702	-0.497716	1.5213	-0.0514784	0.374372	-0.795633	-0.137347	0.351236	-0.271089	0.0832159
AMFR	1.36628	1.88102	1.40697	2.22832	1.24206	1.07787	0.315817	1.11482	-0.880115	0.123188	0.0230105	-0.239201
AMH	0.171759	0.190902	-0.429694	-0.429541	-0.530865	0.63046	1.12004	0.836797	0.36591	0.645023	0.0646639	-0.583269
AMHR2	-0.0783886	0.438101	-0.570193	0.00808578	0.157156	0.198599	0.66882	0.171939	0.45402	0.547586	1.26273	1.05909
AMIGO1	-0.133995	-0.152977	0.580118	-0.64258	0.326706	0.210181	1.21796	0.771654	0.0228851	0.12718	0.0441928	-0.0710028
AMIGO2	0.208523	-0.245508	0.0474175	-0.0199438	0.254281	0.65773	-0.534295	-0.118261	1.26053	-0.129752	0.420665	0.468855
AMIGO3	0.552125	0.430985	1.50413	1.4259	0.573158	0.826025	0.0386121	0.858506	-0.114737	0.070624	0.161638	-0.334426
AMMECR1	0.664369	0.39886	0.533918	0.820578	1.66252	1.92286	-0.836957	-1.50517	1.07735	1.42027	0.860606	2.12559
AMMECR1L	0.325069	0.478224	0.496215	0.661434	0.494684	-0.1451	-0.283247	-0.797026	0.36235	0.246335	0.698781	0.189345
AMN	1.20901	1.21349	0.28793	1.06689	2.89773	-0.0714005	0.839728	-0.0996442	0.86813	1.21569	-0.70706	-0.956911
AMN1	0.765037	1.09042	0.159858	0.693137	0.550696	1.23797	1.56539	1.46429	0.590596	0.587916	0.865844	1.65265
AMOT	-0.154542	0.102877	0.363768	-0.370039	-0.167684	1.30624	1.32803	-1.22582	-0.259274	-0.108451	0.298398	1.09575
AMOTL1	0.895478	0.798824	1.01234	0.921582	0.0255721	0.777798	0.903038	-0.168335	-0.204236	-0.236405	0.81494	0.679977
AMOTL2	0.888731	0.474536	1.12655	0.767548	0.395865	0.737782	2.33651	-0.143258	1.29352	1.02247	-0.180098	-0.991639
AMPD1	0.217179	0.454773	0.25548	0.728325	-0.436523	0.0401169	-0.486612	-1.22799	-0.183172	0.645627	0.420741	0.472437
AMPD2	-0.438783	-0.935817	-1.43439	-1.16804	-0.528567	0.00631073	-0.418682	-0.517056	0.315719	0.320504	0.367095	0.209715
AMPD3	0.760462	0.00281981	1.36811	1.2815	0.683873	0.974405	1.39221	1.02635	-0.0012988	0.650145	0.143175	0.397482
AMPH	-0.054879	0.306061	-0.236504	0.58202	0.0911421	0.852886	-0.716964	0.368666	0.270381	-0.00913951	0.246512	0.390673
AMT	0.431293	0.312749	0.31809	0.503548	0.687099	-0.192482	0.357899	-0.140519	0.449385	-0.387392	1.76853	0.471314
AMTN	0.420073	0.875358	-0.0114773	-0.273096	-0.0958634	0.647455	-0.799829	0.176051	0.857216	0.741498	0.251712	0.644311
AMY1A	-2.6066	-1.54429	-2.07914	-1.72693	-0.235155	-0.492027	-0.855484	-0.927507	-0.195474	-0.415397	-0.527006	-0.486906
AMY1B	-1.80755	-1.08208	-1.5453	-0.906055	-1.58533	-0.909119	-1.88914	-0.896765	0.678687	-0.429511	0.580372	-0.91175
AMY1C	0.0539795	-0.637759	0.142346	0.157037	0.0117524	-0.54867	1.12309	0.111587	-0.220196	0.392215	0.953602	0.883152
AMY2A	-0.248693	-0.510896	-0.915818	-0.713139	-0.535684	-0.257618	-2.03817	-1.87917	0.475084	0.850186	0.452414	-0.710977
AMY2B	-0.236579	-0.287372	-0.441739	-0.307602	-0.55619	-0.321797	0.0997637	-0.824417	-0.5265	-0.570119	-0.267837	-0.235878
AMZ1	0.286675	0.287238	0.74996	-0.169302	0.774223	0.988234	-0.316459	0.404605	0.369802	0.463883	0.339828	0.265182
AMZ2	0.447547	-0.360529	0.294434	-0.296677	-0.685112	-0.873515	0.0478679	-0.242025	-0.299877	-0.0891916	0.76814	0.20909
ANAPC1	-2.20436	-1.74034	-1.32428	-1.85411	-0.139802	-1.42371	0.211105	-2.52754	-0.28024	-1.412	-0.953881	-0.0934057
ANAPC10	-2.44943	-2.31197	-1.63809	-2.67505	-1.32722	-1.02729	-1.6065	-1.01344	-0.595111	-2.04585	-0.845739	-0.376538
ANAPC11	-3.26008	-3.73634	-1.72579	-1.97463	-1.13041	-1.78738	-2.15655	-1.00266	-2.20185	-3.483	-6.28001	-2.99807
ANAPC13	-1.47104	-1.58782	0.150585	-0.536912	-2.02672	-0.14778	-0.404959	0.0653845	-1.60155	-0.440561	-1.43525	-1.12587
ANAPC15	-1.39115	-1.29361	-0.925223	-0.905583	-0.884685	-1.27721	-1.04884	-1.17594	-1.42779	-0.877596	-1.86201	-1.64789
ANAPC16	-0.0849873	0.30603	-0.102979	-0.27852	-1.55436	-0.779042	-0.623682	-0.598729	0.139409	0.259839	0.418736	0.818175
ANAPC2	-3.7017	-3.75167	-2.96872	-2.89855	-2.66181	-1.47994	-1.37965	-2.72262	-3.40606	-2.62316	-2.9329	-0.977694
ANAPC4	-2.63573	-2.35375	-2.38541	-1.99598	-2.76827	-1.34786	-3.53253	-3.27352	-1.10758	-1.25717	-1.29754	0.426921
ANAPC5	-2.07081	-2.69157	-1.45273	-1.8539	-2.98341	-1.516	-0.367194	-4.32693	-3.31844	-4.47974	-2.30738	-1.60826
ANAPC7	-0.21368	-0.43083	0.0660765	-0.502012	0.383041	0.547426	-0.0467735	-1.53452	0.643326	0.547317	0.458578	-0.131424
ANG	0.351431	0.32456	0.154606	-0.0455237	2.4239	-0.812521	0.532551	-1.12446	0.276858	0.219052	0.0329492	0.0984118
ANGEL1	-0.387823	-0.0825124	-0.0613629	-0.197323	0.10824	0.289988	0.337349	-0.575903	0.326574	0.420175	0.354218	1.08168
ANGEL2	-0.673572	-0.734835	0.388991	0.604421	-0.815304	-0.575204	-0.287235	-0.684319	0.73214	0.370875	1.2952	1.94193
ANGPT1	0.921009	0.694009	1.1593	1.9829	0.837051	0.772589	1.06766	0.479235	0.599163	0.669404	-0.170909	-0.275416
ANGPT2	0.958322	0.775581	0.546375	0.9116	0.719037	0.655156	1.24167	1.42738	0.973178	0.954087	0.318556	-0.224743
ANGPT4	0.780473	0.498767	0.765718	1.193	0.0448439	-0.161431	0.733551	1.32777	-0.668044	0.691146	-0.281943	-0.0828866
ANGPTL1	0.698283	0.860113	0.253414	0.787146	0.462443	0.51172	0.196881	-0.059156	0.790815	0.521907	0.89243	0.738614
ANGPTL2	0.120478	0.232909	0.133139	0.467286	0.137214	0.406788	-0.0504879	-0.232762	0.598498	0.173841	0.491972	0.474001
ANGPTL3	1.10724	0.927479	0.72191	0.600203	0.769082	0.45904	0.0328745	-0.0611958	0.94517	-0.390076	0.186428	-0.0895819
ANGPTL4	0.35736	1.0879	0.299959	0.105875	-0.411884	-0.474582	0.467956	1.37023	1.04298	0.90009	1.05155	0.897765
ANGPTL5	1.14351	0.285483	-0.209334	0.657557	-0.22509	0.562215	-0.792098	-0.965017	0.359358	-0.791388	0.254491	1.68691
ANGPTL6	-0.0479148	0.696087	-0.0754155	-0.303384	-0.786693	1.11782	1.25752	0.771993	0.0868117	-0.0655706	-0.300871	-0.259467
ANGPTL7	0.293655	0.0987686	0.670182	0.814499	0.0568389	0.111847	0.755097	1.00914	0.0858357	-0.202114	0.771771	-0.17665
ANGPTL8	1.42363	0.634434	-0.541566	-0.121692	0.664476	1.06712	1.0835	1.80652	1.13142	-0.608772	0.735522	-0.431979
ANHX	0.286264	0.0480544	0.161948	0.420387	0.317713	-0.807047	0.524578	0.65579	0.5355	0.318511	-0.299056	0.452721
ANK1	-0.0407385	0.294962	0.150731	0.443208	1.02188	0.751836	1.87628	0.701313	-0.150471	0.579774	0.590923	0.974085
ANK2	-1.77695	-0.653029	-0.964328	-0.937575	-0.0639978	0.874334	-0.0953173	-1.69733	0.410894	0.44921	0.978637	0.00690969
ANK3	0.107273	-0.0289727	-0.745646	-0.747409	0.0678559	0.0595161	0.27588	-1.07314	1.03813	0.0416882	-0.0251339	-0.883334
ANKAR	0.72016	0.589272	-0.289002	-0.178569	0.214761	-0.308487	-0.715998	-0.177294	0.0837899	0.425253	0.850925	0.866307
ANKDD1A	0.487313	0.428388	0.364114	0.19058	0.744402	0.0424455	1.00681	0.134235	0.695644	0.483232	0.0937405	0.390004
ANKDD1B	0.455469	0.353937	0.152686	0.829408	-0.748202	0.138279	0.066606	0.261933	1.15851	0.66115	0.626435	-0.440863
ANKEF1	0.930312	1.07016	0.549978	0.0124377	-0.0627396	0.47534	0.217114	0.295363	-0.296122	-0.82881	0.687417	1.06182
ANKFN1	0.120089	0.500299	0.0801487	-0.398939	0.268314	-1.12775	-0.693153	-0.349421	0.56165	0.515196	-0.415896	-0.784312
ANKFY1	0.493677	0.31668	-0.0312802	0.303626	0.142457	0.568118	1.06866	1.47546	-0.960481	-0.441434	-2.55944	-2.0107
ANKH	1.05296	0.799032	0.839199	1.26099	0.6353	-0.558945	0.628249	1.05732	-0.691827	-0.196589	-1.5436	-1.4267
ANKHD1	0.653533	-0.000444616	0.239287	0.699006	0.643345	0.777818	-0.321119	-0.564587	-0.360703	-0.231148	-0.370419	-1.4443
ANKHD1-EIF4EBP3	0.401207	0.271194	-0.392624	0.0804204	0.654495	0.719071	-0.705882	0.476094	-0.042256	-0.22191	0.370934	0.195159
ANKIB1	0.752259	0.741456	0.896757	0.195094	-0.0481618	1.1591	-0.523321	0.321815	0.191081	-0.576136	0.198393	0.818559
ANKK1	0.577451	0.677934	0.0996153	0.119832	1.106	0.189836	0.484701	-0.152313	0.591691	-0.383746	0.725765	0.126956
ANKLE1	-0.115364	-0.107166	-1.2775	-0.0120731	-0.158822	-1.16874	0.391041	1.16739	-0.0509653	-0.685742	0.585931	0.256639
ANKLE2	-2.0979	-1.90512	-1.07537	-1.37924	-2.35977	-1.82953	-0.600006	-1.23631	-1.93703	-1.88268	-1.63217	-1.68859
ANKMY1	0.312273	-0.345856	-0.5337	0.661958	-0.466384	0.250279	1.0431	0.752615	0.0564571	0.300784	-0.484536	-0.35559
ANKMY2	0.536663	0.850115	0.651289	0.971495	-0.125018	-0.0497421	-0.588954	0.162793	1.26284	1.17408	0.511467	0.146359
ANKRA2	-0.0179496	0.341147	0.35816	0.238485	-0.908659	0.0949748	-1.77122	-1.31741	0.113968	-0.613648	0.11888	-0.504675
ANKRD1	-0.261906	0.00723472	-0.660642	-1.36174	-0.258919	-1.15692	-0.617295	-1.13443	0.774895	0.666921	0.439064	0.145918
ANKRD10	0.740886	0.692425	0.70145	1.63508	-0.325143	0.331781	-0.352758	1.01256	0.170799	0.718592	0.804881	1.23729
ANKRD11	-0.524628	-0.637084	-0.587244	-1.46156	-0.189452	-0.00302631	0.226174	1.04913	-0.060987	0.458023	-1.59201	-1.24775
ANKRD12	0.857373	0.946178	0.564911	0.324468	-0.0647801	-0.501076	0.262064	-0.513187	0.0433197	-0.0889321	0.453435	0.482303
ANKRD13A	-0.0787438	-1.02144	-0.389406	-0.119551	-0.85313	0.257101	-1.5998	-0.548382	-0.551828	0.784311	1.43306	0.588958
ANKRD13B	-0.444125	-0.626514	0.550638	-0.966396	0.460346	-0.926604	0.428774	-0.132192	0.296869	-0.119865	-0.349203	0.45646
ANKRD13C	0.356683	0.683725	0.398781	0.174461	0.773275	0.141691	1.21192	0.333714	0.288427	0.0788869	-0.248342	0.160304
ANKRD13C-DT	1.00026	0.646536	0.730848	0.0945794	1.00876	1.32391	-0.529869	-0.56245	0.821639	0.166826	0.672876	0.341119
ANKRD13D	-0.949686	-0.506325	-1.67054	-1.42761	-0.963724	-0.346405	-0.933849	-4.06726	0.58244	0.386645	-0.0568522	0.0551555
ANKRD16	0.82277	0.820976	0.659704	0.586421	0.270834	0.109396	0.164781	0.372583	-0.433598	0.682602	-0.19065	-0.508186
ANKRD17	0.14102	0.0909698	-0.316943	0.140788	0.0143757	0.135358	0.126867	-0.352844	-1.3202	-0.812817	-1.14753	-1.03182
ANKRD18A	0.824993	1.29927	1.06682	0.31775	0.853161	0.777389	0.50726	0.417718	0.562197	0.878616	0.201286	0.0309189
ANKRD18B	0.700302	0.562393	0.117373	0.962953	-0.474369	0.241863	-0.385435	-0.0725765	0.280271	-0.412936	0.281002	1.95501
ANKRD2	0.265895	0.129068	-0.516265	0.660779	-0.634543	-0.126372	-0.24739	-0.591946	-0.0673474	0.75389	0.457708	0.388142
ANKRD20A1	-0.612211	-0.128227	-0.641997	-0.320546	-0.17978	-0.929954	-1.2912	-0.260883	-1.97145	-0.351311	-1.4538	-0.616206
ANKRD20A2P	-0.893998	-1.12254	-1.5786	-0.695401	-0.541854	0.234223	-1.03675	-1.44484	-1.88716	-1.1697	-1.23101	-0.636618
ANKRD20A3P	-0.701301	-0.858322	-0.845169	-0.951749	-0.40404	0.574818	0.537639	-1.32145	-1.63822	-0.823375	-2.92779	-1.78397
ANKRD20A4P	-0.221731	-0.53284	-1.03346	-0.7243	0.374089	0.113624	-0.391366	-1.07521	-1.61733	-1.83669	-0.733646	-1.13827
ANKRD22	0.768615	0.684192	0.797508	-0.347323	-1.35234	0.934818	0.442001	0.613651	1.55469	1.18875	1.24664	-0.263493
ANKRD23	0.688367	0.159559	0.770201	0.326284	0.244643	0.0440613	-0.164743	0.552166	-0.569685	-0.163417	-0.154036	-1.31153
ANKRD24	-0.540422	0.0509448	-1.33107	-1.15963	0.215911	-0.797487	0.379868	0.322641	-0.0494711	-0.784319	0.131877	0.200874
ANKRD26	0.819984	0.620981	0.615539	1.00197	0.523497	1.2136	0.462642	0.643843	0.263692	-0.34818	0.796561	1.46018
ANKRD27	-0.357385	-0.254675	-0.450402	-1.37809	-0.881298	-0.528243	-0.320622	-0.373004	0.911001	-0.386273	0.0908796	-0.18124
ANKRD28	0.0654366	0.233239	-0.0461057	-0.311271	0.406753	0.466577	-0.967837	-1.10944	0.798404	0.282247	-0.197816	1.08771
ANKRD30A	1.20083	0.250885	1.11591	-0.0339953	-0.0614996	1.25419	-0.667847	0.35136	-0.439054	-0.148743	0.528466	0.586101
ANKRD30B	1.13615	0.433192	0.432276	0.243453	0.678147	-0.305374	-0.157511	0.222141	-0.00371426	1.51753	-0.734629	-0.95023
ANKRD31	0.651284	0.404397	0.587818	0.75712	1.16645	-1.14519	0.150361	0.776057	0.798345	0.698304	0.0141705	-0.235539
ANKRD33	-0.603189	0.624461	0.469264	0.343304	-0.271352	-0.114621	0.684327	0.447181	0.566011	-0.0705587	0.375397	0.0418786
ANKRD33B	1.25325	0.977835	1.10716	0.910683	0.0237897	0.961924	0.488537	-0.101749	-0.416191	-0.311563	0.634566	-0.0122948
ANKRD34A	0.391524	0.651288	0.317647	0.166092	-0.112614	0.112113	0.0380233	0.910958	-0.135391	0.488377	0.723023	0.44405
ANKRD34B	0.224253	0.459786	0.5131	0.462256	0.225589	0.6228	0.283218	0.674245	0.453707	-0.437989	0.340717	0.728492
ANKRD34C	-0.0207788	-0.357387	0.450977	0.732648	0.296724	0.0872535	0.165415	0.847822	0.151767	0.442186	-0.227655	0.971214
ANKRD35	1.06466	0.594596	1.08626	0.927635	-0.552661	-0.716128	0.920025	0.709942	0.121834	0.945878	0.714287	-0.660926
ANKRD36	0.00583593	-0.262181	0.654782	0.920246	0.415363	-0.523055	-0.95165	-0.871607	-0.0202391	-0.628814	0.109049	1.1262
ANKRD36B	-0.120066	-0.40821	0.15476	-0.70368	-1.37745	0.151148	0.807536	0.164865	1.11994	0.70837	0.871025	2.56625
ANKRD37	0.762328	0.879487	-0.0320723	0.261044	0.111366	0.24554	0.55076	0.839193	0.829052	1.28163	1.01082	1.16461
ANKRD39	-0.432292	-0.67513	0.540188	0.00444387	-0.404685	0.409076	-0.839887	-0.674525	0.775599	0.278069	1.24632	0.399898
ANKRD40	0.130005	-0.211747	-0.190276	-0.230625	0.065886	-0.197321	0.0627708	-1.24197	0.233711	0.218229	1.33521	1.06377
ANKRD42	0.0516922	-0.0112689	0.693255	-0.339174	0.31237	-0.0460061	-0.581706	-0.407923	0.629302	0.545752	0.368438	-1.76322
ANKRD44	0.360613	-0.421247	0.185422	0.187349	-0.302443	-0.111899	-0.430173	0.840407	0.0312131	0.579841	-0.199159	-0.223129
ANKRD45	0.645227	0.616255	1.29026	1.08806	1.00325	0.515867	0.315817	0.249435	0.464816	-0.429556	0.933463	0.858787
ANKRD46	1.29697	1.08359	0.994851	1.41138	-0.335849	0.868656	-0.484598	0.260848	1.43049	0.705395	1.21478	0.62124
ANKRD49	-2.98203	-3.06606	-0.423837	-0.91347	-0.971164	0.380969	-1.12278	0.15125	-2.68866	-2.45428	-2.81736	-2.72415
ANKRD50	-0.493935	-0.151029	0.143647	-0.196223	0.338945	-0.523688	0.613105	0.473537	0.202046	0.33133	0.723288	0.754961
ANKRD52	-0.972534	-0.474226	-0.383164	-0.934509	0.142417	0.381643	-0.547295	-1.17908	-0.453175	-0.899271	-1.74474	-1.76819
ANKRD53	0.11126	-0.461475	0.145206	-0.725925	-0.577381	-0.402006	0.657164	-0.587996	-0.0768919	-0.590408	0.184917	0.667013
ANKRD54	0.232051	0.323256	-0.274977	0.606098	-0.0166007	-0.0555351	0.945648	0.0563997	0.213276	0.997258	-0.870038	-1.22664
ANKRD55	0.558514	0.949684	0.516565	0.0646054	1.46378	1.55693	-1.12375	0.118549	0.235668	1.02824	0.0879713	0.930303
ANKRD6	-0.0700315	-0.688245	0.351189	0.372518	1.48858	0.35854	0.431568	0.316894	0.810432	0.311404	1.43261	0.556462
ANKRD60	0.548598	0.574599	0.128152	0.134916	0.821525	0.561663	0.960294	-0.793076	-0.590084	-0.288993	0.714211	-0.613107
ANKRD61	0.482304	0.935374	0.514475	0.334459	0.993455	-0.434035	0.0482756	1.19786	1.20715	0.282117	0.104566	0.017571
ANKRD62	0.735698	1.04102	-0.0364971	-0.101779	-0.519776	-0.229033	-0.030859	0.78441	0.00872877	0.212722	0.84892	0.675712
ANKRD63	-0.296918	-0.411171	0.660474	0.234007	-0.584196	-0.359744	1.0113	1.63395	0.813288	-0.0229878	-0.486087	0.441463
ANKRD65	-0.703371	0.170229	-0.0970308	1.31876	-0.313517	-0.0660406	0.765742	0.556294	-0.393346	-0.367954	0.594819	0.293413
ANKRD66	0.560507	1.24198	0.942023	-0.15874	0.745168	-0.299256	0.305173	0.310434	0.853422	0.395145	0.0221736	-0.0746845
ANKRD7	0.15069	0.649211	0.178517	0.0620288	-0.0783135	-0.387299	-0.0720042	0.768011	0.327086	-0.390635	0.61819	-0.612837
ANKRD9	0.626392	0.638537	0.52289	0.706971	0.261136	-0.2844	0.631435	0.770164	0.361431	0.250544	0.373184	0.292944
ANKS1A	0.170644	0.149062	0.518875	0.126946	-0.703622	0.308536	-0.211128	0.0215452	0.0735667	1.37043	-0.120864	1.10256
ANKS1B	0.239886	0.0100213	0.0760096	0.261031	0.292852	1.39983	0.618344	0.507857	0.245678	0.734206	1.73226	0.894154
ANKS3	0.570909	1.06141	0.586058	0.571513	1.79975	0.783191	0.722483	0.776186	0.327511	0.0346355	0.67089	-0.192126
ANKS4B	1.14374	0.0968313	0.882677	1.40093	1.00198	1.10526	-0.564538	0.902459	0.350771	-0.280225	0.0207048	-0.272394
ANKS6	-0.358357	-0.175441	0.771851	-0.59513	0.400926	-0.0211795	-1.38557	0.233343	-0.378404	1.05309	-0.320159	0.0164764
ANKUB1	0.015895	0.791578	1.70777	0.940447	0.773638	-0.299003	0.132302	1.48631	0.497968	0.255412	0.619533	-0.100567
ANKZF1	0.17894	0.477133	1.18086	0.667539	-0.0816283	0.230792	0.329316	-1.06926	0.361157	0.328505	0.732988	0.473674
ANLN	-1.37865	0.256165	-0.410361	-0.339305	0.422218	-1.19961	-0.596277	-0.203369	-0.438448	-0.490354	-0.0502245	0.10451
ANO1	-0.297455	-0.0499798	-0.930283	0.086902	0.387134	-0.00138196	-0.260321	-0.379683	0.0438243	0.272542	0.788789	-0.192362
ANO10	0.39973	0.491157	0.6965	0.676054	0.0619844	0.492907	-0.523578	-1.03761	0.74542	0.671373	0.475048	-0.1735
ANO2	-1.01095	-0.345804	0.199588	-0.553864	-0.277951	-0.278895	-0.99429	-0.110604	0.155786	0.0309	-0.111468	-0.300797
ANO3	0.165335	0.581195	0.729308	0.421985	0.415665	0.957512	-0.0644546	-0.222938	0.214021	0.570827	0.442921	-0.8817
ANO4	-0.114214	0.493572	0.670044	-0.27383	0.976861	-0.353125	-1.39516	-0.740591	0.19404	0.949748	0.62982	0.160787
ANO5	0.669455	0.731977	0.367964	0.446431	0.806625	0.626783	0.97784	0.205903	0.685357	0.543	0.299325	0.101951
ANO6	0.522326	0.967655	0.703787	1.0899	1.26941	0.572694	0.231851	0.550741	0.781545	0.817774	0.109429	-0.483779
ANO7	-0.633602	0.0183681	0.0340936	-0.0157177	-0.127988	0.526039	-0.242943	-0.697173	0.25685	-0.0168656	0.762713	-0.10199
ANO8	-0.499301	-0.0854808	0.1609	-0.7292	0.361346	-0.0234877	1.03331	1.58037	0.475495	1.04021	0.324758	-0.0881461
ANO9	0.0940115	-0.21089	-0.414321	0.114938	0.174677	0.415183	-0.775157	-0.495153	0.405085	0.153817	0.265799	0.0455461
ANOS1	0.96604	0.313068	0.286849	0.790919	0.109289	0.197884	0.587134	0.441968	0.366868	0.371971	0.276388	0.376813
ANP32A	0.333015	0.283021	0.844287	0.206098	0.319447	0.908569	0.630544	1.81073	0.757507	0.374723	-0.741342	-0.319518
ANP32B	-0.158222	-0.415092	1.06173	1.29169	1.6921	1.98342	1.93094	1.77641	0.544184	0.774983	0.509727	1.85138
ANP32CP	0.359675	0.602257	0.440747	0.656797	-0.247128	0.023508	0.44102	0.207441	0.473383	0.801758	0.145427	-0.535123
ANP32D	0.373371	0.526113	-0.169387	0.464692	1.34018	1.10438	1.67531	-0.00516635	0.611504	0.616906	1.56083	1.29443
ANP32E	-0.257433	-0.883513	-1.63286	-0.53327	-0.53151	0.133867	0.126036	-0.0169032	-0.428415	-1.4619	0.132943	-0.566737
ANPEP	0.253618	0.14998	0.718335	1.33199	0.775917	-0.189015	-0.204273	1.56903	1.23395	0.873695	0.7307	0.793427
ANTKMT	0.228613	0.716084	1.06256	0.609138	0.644011	2.04021	0.178128	0.116072	0.716709	1.1231	0.296961	0.519176
ANTXR1	0.282775	-0.679856	-0.0871912	0.106669	1.35814	-0.15756	-0.667575	-0.985836	0.035913	-0.332567	0.586688	0.0769471
ANTXR2	0.615991	0.69632	0.469869	0.820368	0.266358	0.680812	2.08979	0.804468	1.33329	1.59716	1.42312	0.922684
ANTXRL	-1.08555	-0.243275	-0.02894	0.064744	0.515754	-0.784333	-0.399766	-1.77517	-0.0216649	-0.506123	0.998095	-0.273399
ANXA1	0.61755	0.426778	0.342983	0.337173	-0.276999	0.688125	0.438966	-0.130652	0.719623	0.574965	0.387082	0.742978
ANXA10	0.482432	0.241762	-0.200314	0.187933	0.638345	1.02504	-0.293818	-0.427623	0.582186	0.452117	0.336349	-0.0264245
ANXA11	-0.0996977	0.741093	0.0351303	0.445618	-0.517759	0.915392	-0.402639	1.95983	0.608903	1.26391	-0.351661	0.738614
ANXA13	1.08766	0.268213	0.188665	0.135807	0.29751	0.598288	-0.00814992	0.456457	0.391648	0.58984	-0.12207	-0.0113282
ANXA2	0.645764	0.182435	0.449409	0.415225	1.1353	-0.276766	0.937283	1.21018	0.279968	0.484171	0.420287	0.668008
ANXA2R	0.3235	0.688711	0.446357	0.0268063	-0.926019	-0.78327	-0.745049	-1.03777	0.959858	0.501507	1.0524	0.511045
ANXA3	0.00986877	0.312442	0.270541	0.846962	0.897338	-0.351307	-0.419671	-0.574996	0.529105	0.579058	0.247192	-0.44989
ANXA4	0.312955	0.595037	0.111124	0.749207	0.051167	0.100858	1.21736	-0.411331	0.614438	-0.358313	-0.219486	0.0862011
ANXA5	0.484987	0.111006	0.611166	1.42094	-0.952735	0.849536	0.692587	-0.0862723	0.87963	1.1172	0.565093	0.083884
ANXA6	0.761536	0.944672	0.0415847	0.716456	0.230428	-0.459814	-0.202687	-0.00676905	0.546316	0.437623	-0.701254	0.615312
ANXA7	-0.110431	-0.141264	-0.569671	0.160449	0.0224287	-0.0911613	-1.06462	0.356783	0.745616	1.06926	0.0223926	-0.226663
ANXA8	-0.855612	-1.27431	-0.461705	-0.87878	-0.482434	-0.365974	-0.91576	0.943514	-0.643224	-0.782373	0.174659	-0.197265
ANXA8L1	-0.702656	-0.513908	-0.132052	-0.124116	-0.962817	-0.532717	-1.54609	-0.961892	-0.506883	-1.0935	0.507534	-0.12131
ANXA9	-0.299116	-0.189958	0.326749	-0.275218	-0.388031	0.364709	-0.793547	0.130463	0.32957	0.176156	-0.576321	0.509368
AOAH	0.390065	0.807005	0.464287	-0.4641	0.716214	1.27435	0.0600982	-0.443715	0.43278	-0.063166	1.07137	-0.293809
AOC1	0.738228	-0.014162	0.811341	0.900412	0.153345	0.68839	1.64376	0.878888	0.175963	0.125558	-0.283645	0.315646
AOC2	-0.233921	0.377564	-0.0922485	0.271006	0.491417	-0.225391	0.836949	-1.14212	-0.0652156	-0.324693	0.405103	-0.242957
AOC3	0.113345	0.128969	-0.266837	0.348466	0.349611	0.219046	1.67954	0.65299	0.292984	0.0079097	0.616564	0.0552123
AOPEP	0.123647	1.30446	0.0947813	0.157289	1.29763	-0.397431	-0.507361	-0.576048	1.01443	0.176554	1.26978	1.20445
AOX1	0.614636	-0.448931	-0.911693	0.0132421	-0.289329	-0.626904	-0.231752	0.0681528	0.311152	-0.477268	0.0245666	-0.533972
AP1AR	0.112819	0.361336	0.101578	-0.629846	0.95444	1.71894	-0.825361	-0.0651297	1.10829	0.936371	0.401548	0.34726
AP1B1	0.29436	0.699904	0.336969	0.104725	-0.72564	-0.00736289	1.25616	-0.490847	0.492178	-0.144135	-0.719785	-0.00818666
AP1G1	0.203662	-0.0580669	0.941005	0.561059	0.431291	0.49303	3.15382	3.38623	-0.381357	-0.314292	0.507212	-0.198985
AP1G2	0.0426579	-0.665599	-0.0143923	-0.665427	-0.627648	0.192859	-0.566683	-1.96871	-0.755078	-0.926247	-1.01863	-0.65642
AP1M1	-0.289635	0.261216	0.187488	0.152541	-1.27669	0.422455	2.39449	3.44936	-0.492977	0.185472	-0.471773	-0.247753
AP1M2	-0.069068	0.281431	-0.371366	-0.362126	0.728252	-0.147798	0.324348	0.867248	1.11685	1.39877	-0.574563	-0.61025
AP1S1	0.306822	0.681907	1.85069	0.677679	-0.115398	-0.0655217	0.318686	-0.255431	-0.744967	-0.312927	0.297699	-0.128282
AP1S2	0.47571	-0.190374	-0.32709	-0.0754371	-0.289916	-0.384746	0.859372	0.717178	1.04095	0.406039	0.747359	-0.718269
AP1S3	0.28369	-0.0541999	0.541343	0.308454	-0.608089	-0.503323	-0.203669	-1.33378	0.478898	0.188821	0.717709	-1.58746
AP2A1	-1.19904	0.0361991	0.0626499	1.43997	0.0833794	-0.775141	0.987715	0.0246696	-0.618013	1.00864	-2.11394	-0.195452
AP2A2	0.422987	0.663806	0.249025	0.203504	-0.261752	0.653236	0.330479	-0.361215	0.831223	0.65784	-0.814728	0.0494979
AP2B1	0.648908	0.0853473	0.0744998	1.47046	-0.053749	-0.765949	0.719961	0.0602364	-1.62813	-2.4214	-1.59598	-2.86502
AP2M1	-0.917485	-1.80023	0.422294	0.371784	-2.02891	-0.494846	0.740677	1.19722	-2.5805	-2.43303	-3.54026	-2.46373
AP2S1	-2.19534	-1.6135	0.15199	-0.562039	1.05824	-1.7537	-0.352454	-0.744542	-3.05225	-1.83678	-0.650653	-2.05704
AP3B1	1.14274	0.90621	0.972521	1.20597	0.0127062	0.0881318	0.255934	0.326267	0.359944	0.673766	0.246984	-0.232179
AP3B2	-0.160267	0.131247	0.662729	0.628028	-0.184828	-0.597714	-0.253129	0.849797	0.455819	0.346002	0.513131	0.0625899
AP3D1	0.924664	-0.0488709	0.0977654	0.469828	-0.731709	0.70659	0.521709	1.15327	-0.00796821	0.590936	-1.02449	-1.82135
AP3M1	-0.367455	0.264081	-0.216484	0.661041	-0.950013	-0.094211	-0.159247	0.79401	-0.412396	-0.456644	-0.708572	-0.298635
AP3M2	0.253677	0.196912	-0.0719835	-0.498213	-0.393112	-0.0460265	0.815343	0.284144	-0.326281	-0.269219	0.4835	-0.164505
AP3S1	0.309745	0.50409	0.610726	0.558282	-0.230395	-0.243971	0.626135	0.83636	1.00027	-0.00825149	-0.123522	0.179224
AP3S2	0.353613	0.0280289	-0.523993	0.107882	0.0411783	-0.0479793	0.23931	-0.122988	0.021209	-0.0631279	0.402077	1.27851
AP4B1	0.0700777	0.0625534	0.0549306	-0.745706	-0.0657278	0.0883157	0.473135	0.459647	0.380363	0.205154	0.893849	-0.013759
AP4E1	0.626162	0.467031	1.14718	0.29336	-0.598794	-0.737555	2.24002	0.492283	0.274689	0.431829	0.574019	0.393046
AP4M1	0.794836	-0.0349068	0.279047	0.184137	1.09367	0.879278	0.817049	-0.840315	0.537202	0.0735073	0.147855	-0.257245
AP4S1	-2.3703	-1.34536	-2.65961	-2.78746	-1.62303	-1.76622	-1.25099	-1.67307	0.260148	-0.405823	-0.357315	0.176054
AP5B1	0.51655	0.254181	0.51684	0.116756	0.421633	0.274321	0.207194	-0.895907	0.139978	0.470929	-0.483194	0.611702
AP5M1	0.0798403	0.0223752	-0.466517	0.368326	0.597091	-1.20706	-0.0795991	0.155427	-0.288748	-0.343125	0.118139	0.877992
AP5S1	-0.20862	0.235786	-0.521463	0.332192	-0.0459036	0.151352	0.559382	0.331512	-0.198662	-0.181177	0.0305808	-0.360186
AP5Z1	0.851342	0.396528	0.720755	0.0115521	0.524908	0.486861	-0.188268	0.113206	-0.00199899	-0.669211	-1.30425	-0.101271
APAF1	0.292643	0.338002	-0.633032	-0.578624	-0.577038	-1.00866	1.33634	-0.165983	0.246813	-0.244883	0.864104	1.13737
APBA1	0.693555	0.747144	-0.030612	0.966831	0.0955981	0.353863	0.429529	0.194927	0.664703	0.446033	0.797393	0.597103
APBA2	0.675768	0.380585	0.535788	0.416431	-1.15422	-0.00419063	1.4375	1.74533	-0.0704377	0.157418	-0.158048	0.0481048
APBA3	0.435637	1.06338	-0.0715187	-0.266362	0.814307	0.27332	1.01361	0.676399	0.663705	0.207606	-0.524888	1.38285
APBB1	0.207204	0.223806	0.993448	1.11196	0.388808	-0.615445	0.754886	-0.08488	-0.605379	-1.57549	0.0213324	-0.237965
APBB1IP	1.1354	1.34705	0.235767	0.915137	0.63282	-0.12497	0.638305	0.750025	0.602097	1.25268	0.605049	1.2606
APBB2	0.939052	0.564549	1.62695	1.05015	1.89946	0.801391	0.479824	0.167277	-0.162597	0.0335976	0.574094	0.969608
APBB3	0.178889	0.236854	0.170553	0.331343	-0.378232	-0.129206	0.420137	-0.423749	0.133921	0.495736	0.155931	-0.360531
APC	-0.657318	-0.468461	-1.31045	-0.987461	1.58068	0.95837	-0.738179	-0.0637698	1.14912	0.990839	1.2858	-0.917209
APC2	-0.237295	0.897017	-0.30344	-0.155674	0.210083	0.634423	0.804215	1.79211	-0.435201	-0.0171429	-0.394774	-0.448113
APCDD1	1.45716	1.76452	0.669054	-0.0300128	1.74289	1.27886	0.770966	1.83647	0.749743	1.18455	0.771922	1.82522
APCDD1L	0.630021	0.637862	0.406784	0.87636	1.04884	0.513497	-0.178816	0.709586	-0.474357	-0.0956628	-0.423724	-0.530446
APCS	-0.0281365	0.375438	0.183742	0.507374	0.103522	0.845839	0.46622	0.0885183	-0.765053	0.457128	1.04624	1.36224
APEH	0.0911594	0.184333	-0.27836	-0.496039	-0.218251	-0.313579	1.18036	-0.250509	0.417035	0.510924	0.223026	0.776241
APELA	-0.632579	1.46927	0.372048	-0.430432	-0.977354	0.741275	-0.978799	-2.18677	0.388695	-0.0743815	-0.198327	-1.41631
APEX1	-1.26475	-1.08491	0.599589	0.846464	0.348805	-0.695742	-0.131434	0.134122	0.445454	-0.0932828	-0.408635	-0.162768
APEX2	-3.23708	-2.74871	-0.683495	-1.78197	-1.15761	-0.465247	0.227699	-0.844151	0.340484	-0.442508	0.57591	0.0703087
APH1A	-1.34331	0.0351421	0.420176	0.624255	-0.308859	-0.0691904	-1.9358	0.431721	-0.28423	-0.568464	-0.811816	-0.829815
APH1B	-1.09163	0.120607	0.228854	0.17707	-0.795807	-0.641795	0.0597208	1.00641	0.411833	-0.201421	0.625149	0.188421
API5	-1.66921	-1.53926	-0.409014	-0.0252731	-0.480014	-0.50365	-1.40615	-1.50925	1.12165	1.58622	0.0325291	0.273782
APIP	0.201365	0.718265	0.0560333	0.00517749	0.438066	-0.1835	-0.321204	0.269493	0.641116	0.943283	0.453567	0.18953
APLF	0.704621	1.03692	0.775948	0.0905476	0.0335869	0.053815	1.52463	0.775102	-1.12639	-0.0111057	0.535444	0.652485
APLN	1.20175	0.566107	1.90302	1.76598	2.16198	2.45548	0.112628	1.65937	0.292687	1.27326	-0.213473	0.65031
APLNR	1.47114	0.897458	0.432331	0.998088	1.14857	0.172004	0.474253	0.248415	-0.766383	0.230529	0.768726	0.144028
APLP1	0.579598	1.13394	0.334692	0.23084	1.21759	0.596572	0.134582	-0.180336	0.883991	-0.481115	0.613142	0.328923
APLP2	0.28632	0.287202	0.951593	0.562081	-0.0547188	0.184689	1.45728	0.475933	1.12292	0.936707	0.47431	-0.176622
APMAP	0.677224	0.772101	0.718418	0.417452	0.0284212	2.0304	0.00586209	0.132325	-0.110884	0.457598	1.18845	0.418378
APOA1	1.00018	0.635343	0.540353	0.675609	0.3952	0.110438	0.956852	1.4426	0.470958	0.894296	0.226676	0.0258157
APOA2	0.50188	0.0749359	0.5219	1.13724	-1.0349	1.06561	0.182009	-0.0858028	0.71931	-0.544194	0.288395	-0.532835
APOA4	0.560609	0.976069	0.397076	0.385042	0.0536571	-0.127245	0.279006	0.259359	0.562667	0.163985	0.126582	-0.00503093
APOA5	0.0407514	-0.254727	0.547145	-0.460641	0.167116	0.472582	0.194722	0.535702	0.473539	-0.0679886	0.725349	0.87586
APOB	0.516141	0.901925	0.0592344	0.390282	-0.0227686	0.198926	0.606536	-0.340501	1.14869	-0.478543	1.09659	-0.309548
APOBEC1	0.423575	0.454488	0.386021	0.788063	0.387941	0.406216	0.188426	0.191835	0.305852	0.123644	0.186906	-0.00395059
APOBEC2	0.182982	0.572002	0.210401	0.231563	0.581868	-0.560844	0.263393	-0.256214	0.481206	0.263505	0.800929	-0.041791
APOBEC3A	0.958169	0.590908	0.984896	0.814185	0.613988	-0.247307	1.31143	1.0745	0.384099	0.671641	0.674634	-0.0298504
APOBEC3B	0.758009	0.983185	0.710965	0.735032	0.511459	0.414959	0.961804	1.00168	0.676673	1.02321	0.904135	0.515367
APOBEC3C	0.669711	0.357736	0.91796	0.284772	-0.691242	-0.268545	-0.0700413	-0.658984	-0.00189729	0.985873	-0.0601518	0.534784
APOBEC3D	0.505535	0.839259	-0.069811	0.237757	-0.387688	0.276405	0.196262	-0.923056	0.622574	0.341573	0.641846	0.724413
APOBEC3F	0.386507	1.02471	0.606024	0.438675	0.0838633	-0.328184	0.754357	0.201403	0.862418	1.28129	-0.32205	0.110694
APOBEC3G	0.90335	0.263896	0.959485	0.735661	-0.958784	0.41406	-0.361621	-0.0908537	0.282875	-0.137805	-0.0230539	-0.717402
APOBEC3H	0.361209	-0.142485	0.18366	0.073068	-0.196745	0.207097	-0.889019	-1.50592	0.34772	0.59145	0.0176144	0.47167
APOBEC4	0.990677	0.036438	0.0940006	1.47518	0.421533	0.19143	-0.241371	-0.223353	0.530806	-0.387571	1.37932	0.63247
APOBR	0.201942	0.262746	0.952803	0.623574	-0.12339	0.0572671	0.291493	0.204025	0.193643	0.55631	0.137704	-0.119166
APOC1	0.409358	0.221233	-0.178039	-0.354502	-0.430292	0.416899	-0.271367	0.687148	0.220673	0.420332	0.125062	0.117062
APOC2	1.02042	-0.0953235	-1.37364	-0.0193805	-0.0502588	0.185914	0.798854	0.0674081	-0.558008	-0.574414	1.34402	0.650651
APOC3	0.72614	0.967707	0.335775	0.470902	-0.169013	0.55431	0.538258	-0.489422	0.724688	0.92087	0.0281886	0.499489
APOC4	-0.734397	0.509025	-0.234772	-0.495986	-0.523002	-0.205949	-0.157465	-0.341327	-0.218397	0.651689	-0.279807	0.263747
APOD	0.76634	1.33142	0.436127	0.737652	0.772429	-0.367751	0.76704	0.622911	0.236071	-0.992077	1.45509	0.46233
APOE	0.560839	0.266153	0.0465512	0.173101	-0.478905	0.201847	0.66272	1.30902	0.380715	1.08631	0.615505	0.3937
APOF	-0.613616	0.167062	0.640289	-0.124388	0.6328	-0.258135	0.626951	-0.0331892	-0.0619884	1.00081	0.242257	-0.430785
APOH	0.225217	0.667364	0.319599	0.405138	-0.315128	-0.322924	-0.135119	0.139027	-0.0147941	-0.206006	-0.02801	0.00183492
APOL1	0.0891276	0.504194	0.513952	-0.863924	-0.897549	0.10098	-0.499026	-1.06079	0.162726	0.343944	0.662797	0.747555
APOL2	-0.302745	0.360713	0.146135	-0.0509237	-0.790685	-0.897353	0.50048	0.33135	0.803215	0.301518	0.802498	1.2896
APOL3	0.087929	0.649548	0.610396	-0.14406	1.97265	-1.42996	-1.19935	0.0434163	0.633116	-0.0867624	-0.134529	0.692173
APOL4	0.619313	0.241593	0.862519	0.175802	0.324912	0.107292	-0.253038	-0.737354	0.727896	0.718973	0.448443	0.173879
APOL5	0.847943	0.246634	0.701505	-0.170373	-0.218331	0.224623	1.18595	0.792812	0.777907	0.24414	0.325741	0.686899
APOL6	0.464465	0.450904	0.310827	0.375531	0.173367	-0.0172004	0.777806	-0.0831478	-0.208089	0.102651	0.254643	0.11908
APOLD1	0.022067	-1.00085	0.0441697	-0.235996	-0.0665343	0.66586	0.348432	0.14696	0.349031	0.16021	0.553427	1.8646
APOM	-0.0702385	-0.0894283	-0.848964	0.365208	-0.869825	-0.379823	1.1852	0.30268	-0.277365	-0.575063	-0.539808	0.456317
APOO	1.14995	1.48557	0.328746	0.598055	0.298196	1.02006	1.04453	0.0121233	0.110861	1.31285	1.30457	0.658569
APOOL	1.44824	1.60439	0.833644	1.45448	0.523638	1.82763	1.26009	0.9276	0.306886	-0.37746	0.634585	0.219382
APP	1.02183	1.2012	0.225609	0.439828	-0.369481	-0.0195066	-0.231108	0.318496	0.327575	0.452677	0.49477	0.838076
APPBP2	0.306788	0.266405	0.407746	0.86677	-0.579176	-1.12497	0.732675	-0.704879	0.954578	1.08275	0.700256	0.216382
APPL1	-0.997886	0.667883	0.603219	0.288138	0.415947	0.585808	1.05092	0.156382	0.147361	0.224449	0.094166	-0.252473
APPL2	0.449975	0.985393	0.595794	0.0227766	0.670666	1.11741	2.10715	-0.149007	0.837364	-0.379026	1.08404	1.04152
APRG1	0.37915	0.571612	-0.160911	-0.652641	-0.71955	0.892596	0.57886	0.479527	1.96981	1.30281	1.32178	0.593521
APRT	-0.23525	-1.45875	-0.556086	-0.627881	-0.235083	-0.0142038	-0.421319	-0.56946	0.0380077	-0.335631	-1.24179	-0.449933
APTX	0.0944332	-0.458956	0.22191	0.255445	-0.264514	0.817732	1.27262	0.0318251	0.579487	0.682445	0.288755	-0.776807
AQP1	0.792229	0.858789	1.20064	1.21655	1.01049	1.42561	0.142962	1.027	0.828113	-0.284788	-0.00149178	0.0930385
AQP10	-0.575639	0.2306	0.0689695	-0.477855	-0.308875	-0.28306	0.215816	-1.79863	0.389028	0.986902	0.346522	0.520754
AQP11	-0.0201117	-0.205982	-0.295465	0.0749458	0.140783	-0.959818	0.320921	-0.0528424	0.650328	0.119682	-0.166975	-0.066781
AQP12A	-0.097579	0.170291	0.191341	-0.880169	-0.358069	0.659895	0.22563	0.189617	-0.174351	-0.353548	-1.05764	-0.895417
AQP12B	0.797136	0.399346	0.874949	0.495924	0.143163	0.369346	0.855023	1.46704	-0.447171	-0.534084	0.299325	0.0052181
AQP2	-0.465158	-0.65947	0.154622	0.304799	-0.128274	0.494909	0.229375	0.926888	0.55678	0.722417	0.552065	0.134745
AQP3	0.437247	0.973654	0.369325	0.0669671	0.00760896	0.490558	-0.628287	0.486892	0.439488	0.207324	0.225617	-0.00709211
AQP4	-0.237448	0.254693	0.131079	0.217341	0.449378	0.430667	0.070577	0.580707	0.314669	0.417894	0.588238	0.0966065
AQP5	-0.308419	-0.960748	-0.468607	0.0361102	0.715166	0.296321	-0.625131	0.924104	-1.10723	-0.764501	0.382922	0.192515
AQP6	0.249056	-0.699334	-0.628412	-0.705907	-0.369279	0.642103	-0.950095	-0.0443109	1.36931	0.410825	0.283555	1.19649
AQP7	-0.517574	-1.18183	-0.764071	0.284507	-1.57549	-1.1627	-0.83273	-0.541809	-1.68428	-1.2297	-1.50559	-0.263117
AQP8	0.486367	0.239718	-0.0288932	0.132977	-0.0399635	0.170022	0.993815	0.0110548	0.0895968	0.0173827	-0.960556	-0.54351
AQP9	1.17044	0.378089	1.66666	0.851259	0.504765	0.0142404	1.31263	0.87013	1.25267	1.13885	0.860001	0.0936071
AQR	-1.71567	-1.14529	0.542498	-0.88216	-1.26554	-2.63321	-0.854412	0.0308861	-1.6303	-1.98765	-0.0993714	-0.542671
AR	0.433312	0.635888	0.00753373	0.540229	1.10409	0.414734	0.427853	0.676755	0.679215	0.329134	1.25458	1.22066
ARAF	0.180512	0.387199	-1.96933	-3.63584	-2.95861	-3.38696	-0.517156	0.407308	0.676946	-3.07679	0.525592	-0.247279
ARAP1	-0.149329	-0.0894075	-0.552263	-0.567934	0.167076	0.00751386	-0.978618	-1.18742	0.663569	0.776012	0.833793	-0.207203
ARAP2	1.17256	0.81116	0.342548	0.17046	0.642196	0.545077	0.37629	1.25206	-0.0479357	-0.100351	-0.145037	1.19138
ARAP3	0.368837	0.268236	0.452352	0.0460088	0.756762	0.518992	-0.558952	1.17958	0.596014	0.403578	0.02234	-0.124151
ARB2A	-0.243403	0.272991	-0.737643	0.0269425	0.294123	0.0854559	0.739862	-0.53998	0.74896	0.313863	-0.037718	0.48543
ARC	0.855891	1.47488	0.850584	0.543635	0.666996	0.479405	-0.497319	0.0590546	-0.0758553	0.372956	0.479794	-0.0735473
ARCN1	-2.27421	-2.87154	-1.87475	-3.71182	-3.31892	-3.54976	-2.68456	-3.35058	-3.40802	-1.66935	-2.59688	-1.87679
AREG	0.728593	0.616878	0.458704	-0.112724	-0.0748455	1.2788	-0.324488	-1.46949	0.758114	1.23063	0.6052	0.232602
AREL1	0.248284	0.43662	0.15551	-0.283786	-0.151158	-0.664408	-0.646995	0.208299	0.156479	0.23496	-0.0870275	1.14268
ARF1	-4.17297	-3.83477	-5.17672	-4.79234	-4.20629	-4.57497	-3.05027	-2.50909	-1.96324	-0.977739	-3.21086	-0.724069
ARF3	0.37504	0.444983	1.02631	0.0409416	0.251075	0.953345	1.31867	0.411258	0.7844	0.418677	0.601021	-0.768704
ARF4	-0.235685	0.628876	0.0847049	0.243859	0.0606114	0.0706343	-1.57991	-0.495137	-2.11677	-0.491405	-2.20452	-0.655979
ARF5	0.347383	0.135747	0.7339	0.671836	-0.238075	-0.538457	0.161157	1.3009	0.362233	-0.24779	0.691029	-1.0991
ARF6	-0.589593	-0.990328	-0.932648	-0.646222	-0.617385	-0.783352	-1.78808	-2.22643	-1.28908	-0.454542	-1.49686	-1.25735
ARFGAP1	0.205743	0.594466	0.226929	0.0718543	0.687946	0.320506	-1.48704	0.0989762	-0.444746	0.275297	-0.928902	-0.146563
ARFGAP2	-0.327791	0.108474	0.907867	0.535697	2.6465	1.94216	1.60873	-0.333687	0.536185	0.441023	0.0438468	0.143616
ARFGAP3	0.234463	0.267472	0.655277	0.439356	-0.0130097	0.820796	-1.45738	-0.97847	-0.170068	0.68721	0.159821	-0.274983
ARFGEF1	0.138834	-0.00437907	1.01314	1.04491	-0.283113	-0.267654	-0.72779	-0.298804	0.39114	-0.482793	1.02538	1.29188
ARFGEF2	0.491376	0.0815739	0.11938	-0.29969	0.381892	-0.49699	-0.973725	-0.226469	-1.11755	-0.279375	-0.392997	-0.78363
ARFGEF3	0.535411	0.343819	0.454717	0.0614154	0.434497	0.35613	-0.983268	0.446598	-0.490884	0.516516	0.769407	0.68535
ARFIP1	0.588057	0.749273	-0.435277	-0.338572	1.22745	-0.770524	0.599863	0.13443	1.04562	0.609994	0.58024	-0.0145834
ARFIP2	-0.0128588	0.0122833	0.54775	0.558334	1.08381	0.418309	0.388716	0.189261	0.575243	0.672983	0.156806	-0.191576
ARFRP1	-1.78846	-1.78981	-1.94483	-2.45743	0.0876338	-1.20921	-1.88796	-0.0879235	-2.70528	-2.60348	-1.83284	-2.21483
ARG1	0.768513	0.509025	-0.384401	0.468125	0.46083	-0.0324203	0.260766	0.912431	0.631727	0.63064	0.594951	0.374823
ARG2	0.349846	-0.0478451	2.0455	-0.668859	0.524485	-0.242341	0.203903	0.0825122	-0.108322	0.743265	0.546033	0.378391
ARGFX	0.24707	0.262886	-0.397711	0.317633	0.071705	-0.101476	1.63213	0.81546	0.0430909	-0.102543	0.022171	-0.144411
ARGLU1	-1.82025	-1.40574	-1.59519	-1.77679	-1.37321	-2.09095	-1.67458	-0.11287	-1.98104	-1.41231	-1.18977	-1.02551
ARHGAP1	-0.744875	-1.10797	-0.149911	0.444989	1.09627	0.715354	-0.370583	-0.349353	-2.30277	-2.26191	-0.682969	-0.858145
ARHGAP10	0.199484	0.527334	-0.217199	-0.261934	0.518012	0.242353	0.0706827	0.931	0.348327	0.2383	0.316532	1.17302
ARHGAP11A	1.18971	0.155762	1.10067	0.77339	-0.178898	0.287088	1.88851	1.31896	-0.575943	-0.650042	-0.605952	-0.331052
ARHGAP11B	-0.167576	-0.256363	-0.905478	-0.485585	-0.642568	-2.19792	0.573515	1.82951	-1.12647	-0.240252	0.0169776	-0.0387063
ARHGAP12	0.592939	0.83191	0.885867	1.93147	0.948673	1.14744	1.19667	1.38464	1.28582	0.448583	1.18904	1.02397
ARHGAP15	0.304892	-0.0707324	0.616446	0.0313442	0.655483	-0.505304	-0.301881	0.334701	0.505596	0.159107	0.599697	-0.677359
ARHGAP17	0.118446	-0.123293	0.726063	-0.283445	0.176149	0.217739	-0.323491	0.682664	-0.414782	0.798739	-0.542153	0.231507
ARHGAP18	0.74155	0.254646	0.740335	0.149672	0.108402	0.540093	1.97715	-0.422773	-0.361192	-0.583429	0.384719	0.2962
ARHGAP19	-0.269164	-0.0988813	0.404419	-0.267253	-0.678478	-0.139432	-1.54473	0.188015	1.09516	0.648467	1.28436	0.71469
ARHGAP20	1.38601	0.411796	-0.0587613	0.849949	0.461395	0.0415937	-0.488685	0.831827	0.712738	0.577023	0.227905	-0.258584
ARHGAP21	0.683792	-0.0707948	1.04762	0.168144	0.295655	-0.502751	-0.766142	-0.267444	0.626975	0.0863289	0.328313	0.106301
ARHGAP22	0.62928	1.00214	0.746963	0.474492	0.62778	1.06898	-0.305088	-0.370837	0.209681	0.849157	1.05357	0.429153
ARHGAP23	0.644819	1.05302	0.577671	1.28051	-0.0302168	-0.269098	1.13582	-0.08951	0.335966	0.180668	-0.453676	-0.974566
ARHGAP24	0.200314	-0.469266	-0.636717	0.627792	-0.0936515	0.123858	0.529969	0.0747092	0.0534822	0.739552	0.934617	0.711477
ARHGAP25	-0.950351	-0.348843	0.393886	0.293512	0.347534	-0.161219	1.05796	0.111425	0.0637034	-0.843909	-0.398745	1.7695
ARHGAP26	0.756757	0.673337	0.133397	0.646185	0.361991	-0.232683	1.22883	-0.727997	-0.755352	-0.46369	-1.06338	-0.894578
ARHGAP27	0.376658	0.106728	0.253365	-0.767243	-0.545282	-0.526384	-0.799013	0.297143	0.309349	-0.00489399	0.610268	0.269703
ARHGAP28	0.872503	0.707513	1.09443	0.623731	0.440909	-0.32702	1.25662	0.538956	0.429748	0.934515	0.318537	0.575525
ARHGAP29	0.08786	0.287282	-0.090681	0.104817	-0.418356	-0.0478894	0.199554	-0.265626	0.0606719	0.0861007	0.366415	-0.39674
ARHGAP30	0.233387	-0.290384	-0.191761	0.218573	-0.09594	0.681507	0.303315	0.973139	-0.89981	-0.221798	-0.43715	0.972451
ARHGAP31	0.91968	0.859542	0.399716	0.712159	0.045963	0.512496	-0.333822	0.462933	0.828935	0.303701	0.792892	0.223731
ARHGAP32	0.49475	0.185106	0.73247	0.636491	0.660907	0.0777387	-0.243168	0.727312	0.0793228	-0.359633	0.48766	0.383835
ARHGAP33	0.895478	0.318127	0.496545	0.251303	0.799729	0.196965	0.140758	0.775409	0.632001	0.319271	0.783627	-0.516843
ARHGAP35	0.159608	0.217192	0.00474795	1.07942	0.561201	0.390324	-0.316455	0.840278	0.430002	1.29628	0.744371	0.70164
ARHGAP36	0.367751	1.0184	1.27852	0.356221	2.12165	2.29186	1.37333	0.76738	1.31332	0.913936	1.02387	0.907531
ARHGAP4	0.0506674	0.380398	1.69402	0.512535	1.29654	2.07738	0.796272	-0.095079	0.171893	-0.0660358	0.47346	0.594573
ARHGAP40	-0.396308	0.297439	0.138213	0.772657	-0.272949	0.569527	1.10303	-0.518271	-1.44371	-1.78115	-0.0254894	-0.593248
ARHGAP42	-0.741808	-0.712215	-0.439869	-1.26598	-0.701303	-0.730651	-0.0991676	-1.03445	0.436828	0.312353	0.53153	0.35495
ARHGAP44	-0.0316736	0.723251	0.455569	1.2568	0.306987	0.485533	1.0349	1.0073	0.268579	0.295798	0.0660064	0.822653
ARHGAP45	0.336708	0.0441251	-0.239392	-0.262301	0.0488624	0.44756	0.268467	0.219372	0.779393	0.684481	0.374054	-0.67942
ARHGAP5	-4.58187	-3.2733	-2.36984	-3.37802	-4.17927	-2.87772	-0.273403	-1.94928	-0.253719	-0.750834	-1.16525	-0.820945
ARHGAP6	0.860082	0.79724	1.46351	0.764482	1.15889	0.366813	0.568909	1.60238	1.18988	1.24597	1.04977	0.64016
ARHGAP8	1.25532	1.09956	0.919417	0.941809	-0.0759081	-0.00897047	0.325466	0.981363	-0.0246437	0.925478	0.557813	0.328269
ARHGAP9	-0.616376	-0.607634	0.0642119	0.239727	0.112132	0.00533025	-1.48338	0.0766357	-0.413355	0.785742	0.0421544	0.216297
ARHGDIA	-0.740684	0.127149	-0.683715	0.00193645	-0.9162	-0.299127	-0.28932	-0.61924	-1.30913	-0.918619	-0.442066	-1.11141
ARHGDIB	1.48009	1.5873	1.67744	1.46596	0.324649	1.3713	1.19441	0.540672	0.49431	0.779546	-0.309494	0.0548143
ARHGDIG	0.781598	0.575248	1.18859	0.662561	0.489744	0.505	0.00202691	0.520015	-0.101927	0.165884	0.451601	0.671576
ARHGEF1	0.582563	0.233348	-0.28782	-0.0655725	0.819912	0.0333434	-0.461278	0.755125	0.581306	0.553402	0.229342	0.0137045
ARHGEF10	0.866778	1.08732	1.16332	1.4079	0.135138	0.283207	0.0942072	1.45652	0.588327	-0.0942558	0.960314	-0.157817
ARHGEF10L	0.996504	1.07379	0.776003	0.881757	-0.138853	0.768504	0.813561	1.15149	0.136947	0.402952	-0.107599	-0.498989
ARHGEF11	0.110432	0.148434	-0.27913	0.244401	0.275754	-0.15268	0.292988	0.421133	0.592454	-0.157511	0.0230697	0.180191
ARHGEF12	0.732861	1.43234	0.625164	1.8706	1.44234	0.541686	0.748952	0.874744	1.42167	0.609278	0.880858	1.25463
ARHGEF15	0.553326	0.407298	0.649007	0.389994	1.88932	0.162628	-0.0826491	-0.582427	0.860365	0.601114	0.24515	-0.395759
ARHGEF16	0.682361	0.690295	-0.182494	0.739067	0.397014	-0.523586	-1.07972	0.756906	0.239201	0.513832	-0.312255	-1.10131
ARHGEF17	0.107467	0.451397	0.161978	-0.163907	0.568218	-0.0258327	-0.891662	-0.488062	1.13264	0.253578	0.893792	0.501678
ARHGEF18	0.666465	0.695385	-0.304348	-0.117589	-0.146751	0.318872	1.23804	0.531023	0.92833	0.910625	0.245377	0.866805
ARHGEF19	0.431983	0.457604	0.184152	0.3454	0.188267	-0.184538	-0.0810637	0.11761	0.825805	0.677815	0.127189	-0.244093
ARHGEF2	0.222623	0.427531	0.159553	1.22732	1.07864	0.187406	-1.39708	-0.0209828	0.421279	0.710025	0.272909	-0.326539
ARHGEF25	0.284825	0.196502	-0.105278	-0.362048	-0.571796	0.874416	0.407786	2.0772	0.167032	-0.0248175	-0.0686515	1.22592
ARHGEF26	0.423626	0.59631	1.12006	0.492151	-0.28405	2.07698	1.12951	1.12012	0.828583	1.20996	0.019591	0.290414
ARHGEF28	0.326314	0.527541	-0.0494855	0.555609	0.845035	0.226911	-0.769268	0.201694	1.37469	0.550449	0.228264	0.0940762
ARHGEF3	1.0754	1.07943	1.01187	1.32513	0.484098	0.824473	0.135066	1.51901	1.52306	0.839315	1.57624	1.50396
ARHGEF33	-0.155616	-0.747093	0.367752	0.259477	-0.394886	-0.372469	0.650415	0.00715333	-0.158841	0.155881	1.01649	0.804614
ARHGEF35	-0.940716	-1.69487	0.214856	-1.36108	-1.24584	0.146368	-0.0952871	-0.577764	-1.61928	-0.715671	0.126206	-1.30329
ARHGEF37	-0.0773893	-0.0334525	-0.201909	0.55912	-0.611557	-0.0261023	0.589112	0.180794	-0.156084	0.0991451	-0.268556	-0.0904916
ARHGEF38	0.467532	0.356653	-0.47364	0.420885	-0.101229	0.407809	-0.67745	0.581791	0.977285	0.310085	0.685734	-0.0557643
ARHGEF39	0.196031	0.668065	-0.0777971	0.0420525	-0.285274	-0.111685	-0.832609	1.11654	1.08263	0.00283206	1.11068	0.639734
ARHGEF4	0.572902	0.935894	0.685252	0.334176	0.276581	0.25894	-0.707286	0.366739	0.672917	0.522936	-0.0191908	-1.06877
ARHGEF40	-0.114265	-0.189309	-0.162187	1.03249	-0.0024564	-0.0342321	-0.837607	-0.194617	-0.757875	0.0356421	0.558702	-0.167571
ARHGEF5	-0.364516	-0.703515	-0.0728498	-0.00350022	0.606124	-0.0769729	-0.0578865	-0.120593	-0.194614	-0.78725	-0.537161	0.99103
ARHGEF6	0.820239	0.84718	1.08502	0.817984	2.05955	2.3844	-0.0927505	0.269072	0.165264	0.924046	1.16499	2.05636
ARHGEF7	1.06967	0.620098	0.169516	-0.570842	-1.41568	-0.311747	-0.154657	-0.572633	-0.921911	-1.59352	-0.905228	-1.91205
ARHGEF9	1.07023	0.586649	0.811891	1.38832	1.85639	1.2365	0.612561	0.339526	0.987729	1.00198	-0.0691072	-0.165243
ARID1A	-0.1262	-1.5351	0.424769	0.45788	0.305031	1.40514	1.125	1.16791	-0.285599	1.64279	-1.94338	-2.15441
ARID1B	-0.103685	0.373191	0.427189	0.785259	0.692261	0.551818	0.512303	0.0792259	-1.25747	0.351415	-0.9376	-1.04142
ARID2	-1.49739	-1.48861	-0.571431	-1.48884	-0.173049	-2.0602	-1.04437	-1.06116	1.38283	3.68406	1.21313	1.31263
ARID3A	-2.64008	-3.11852	-3.40982	-3.84544	-0.889	-1.5669	-1.61044	-1.72283	-2.34639	-2.00957	-2.78333	-1.63113
ARID3B	-0.431091	-0.461527	0.381263	0.633059	-0.895553	-0.590422	1.53429	0.316052	-1.09328	-0.448905	-0.290339	0.206773
ARID3C	0.596849	1.24151	1.21224	0.314931	0.669214	-0.079226	-0.597666	0.371401	0.141963	-0.261569	-0.442804	0.406508
ARID4A	-2.00167	-1.70731	-0.540163	-0.826274	-0.956264	-1.591	-1.55195	-0.222428	-0.432815	-0.229023	0.13899	0.838986
ARID4B	0.198732	-0.321133	0.3325	0.534858	-0.97683	0.236144	0.443164	0.458287	0.270328	1.02428	-0.360757	0.353927
ARID5A	-0.368886	-1.1434	0.208726	0.103881	-1.38384	-0.92209	-1.04232	-0.374873	-0.244898	-0.204508	-0.381406	-0.0347261
ARID5B	0.151249	0.16955	0.582923	-0.0796686	-0.594056	0.593447	0.231806	0.939224	0.216595	-0.162589	1.13904	-0.121729
ARIH1	-2.23925	-2.39736	-2.86504	-3.13121	-3.41812	-2.50616	-0.893519	-1.22817	-4.68283	-3.55794	-3.75961	-2.02093
ARIH2	0.102213	-0.730991	-0.100493	-0.192293	1.36994	0.618735	-1.91602	-1.64768	1.35541	1.63306	0.00395803	3.68142
ARIH2OS	-0.0439714	-0.760493	-1.20086	-0.827688	0.218975	-1.63143	-1.31053	1.01199	1.03481	0.476902	0.188112	-0.751518
ARK2C	0.836289	0.42631	0.440609	0.199648	-0.356012	0.160279	-0.688518	-0.130791	0.000662901	-0.348113	0.2585	0.296839
ARK2N	0.0856621	-0.0310788	0.7218	0.476771	0.571605	0.694723	0.553282	0.897959	0.356091	0.0408025	-0.313427	-0.675425
ARL1	-0.833352	-0.721279	0.343907	-0.922535	-0.576817	-0.551673	-1.38555	0.376614	-0.41535	-1.24135	0.691218	0.793796
ARL10	0.172767	0.0320646	0.0303645	0.617679	-1.52077	-0.895842	0.0600982	-0.0521948	0.743328	0.105868	-0.431383	0.418989
ARL11	0.576378	0.827339	-0.0820844	0.289383	0.423025	0.101961	0.883092	1.04333	0.433249	-0.297784	0.743615	0.629101
ARL13A	0.727724	0.66004	0.0837064	1.1292	0.305414	0.969237	0.424954	1.00492	1.1947	1.12458	0.354729	0.102079
ARL13B	0.619748	0.535826	0.305283	0.994551	0.533941	0.538458	-0.130378	2.18534	0.232903	0.461892	0.485618	0.231521
ARL14	0.193654	1.0044	-0.330665	0.0596783	0.5536	2.40605	1.1396	1.61857	0.495953	0.820503	0.82761	-0.886362
ARL14EP	-0.408115	0.869125	-0.218217	-1.38802	-1.14412	0.892146	0.229571	-0.730166	0.570079	0.504683	0.433845	-0.583298
ARL14EPL	0.716582	0.602023	1.03921	1.52452	0.678913	0.158052	0.508135	0.28573	0.343065	0.634957	-0.0171164	-0.581549
ARL15	0.578065	0.618696	0.0909475	0.164303	2.54588	1.4385	0.254394	1.55673	0.911921	0.412503	0.0908077	0.416928
ARL16	-0.257433	0.428907	-0.789096	0.103203	-0.143133	0.223193	-2.45068	-0.072269	0.24163	0.127811	-0.389404	0.00811796
ARL17A	-0.800052	-0.42361	-1.20644	-0.0879611	0.00910102	-1.2712	0.282297	0.584543	-0.830574	-0.433694	-0.691497	-1.34431
ARL17B	0.635107	0.372968	0.135119	1.0879	0.0700113	0.699727	0.576972	0.690386	-0.0729607	1.13997	0.0213359	-0.172721
ARL2	-3.20028	-2.87856	-2.47291	-1.85484	-2.49063	-1.68462	-1.35635	-1.83238	-1.91043	-3.38302	-2.28015	-1.50049
ARL2BP	-0.544537	0.461214	-0.547341	-0.445	0.327553	-0.124751	-0.238871	-0.315622	-0.543183	0.587715	0.171436	1.17119
ARL3	0.213951	-0.586053	-0.536835	-0.185124	0.401853	-0.471171	-0.357226	-0.937965	0.278996	-0.237165	0.35125	-0.370587
ARL4A	0.439343	-0.130175	0.875032	0.19054	0.333299	-0.285084	-0.0770473	-0.121159	-0.138892	-0.814964	0.905894	0.0990514
ARL4C	0.351937	-0.104595	0.894475	-0.0634424	-0.321041	0.184913	0.397836	-0.718429	0.390847	0.58134	-0.177205	-0.365585
ARL4D	0.4477	0.874579	0.110027	-0.0737341	-0.167347	0.441207	0.218941	0.475447	-0.193069	0.310078	0.405462	-0.0797877
ARL5A	0.471621	0.785917	0.196095	0.906517	0.606024	0.609645	1.1553	-0.184903	-0.388281	-0.050879	0.54089	1.58726
ARL5B	1.06489	1.0486	0.467697	0.513452	0.588704	-0.121123	0.911494	0.358855	0.765683	-0.18404	0.323321	-0.493644
ARL5C	0.0114226	-0.00629826	0.000675149	0.324458	0.802613	-0.00845572	-0.618609	0.150181	0.406982	-0.105899	0.551989	0.736311
ARL6	0.481716	0.638199	0.870494	1.00181	-0.151497	-0.748954	0.805422	1.03249	0.634916	0.286605	0.471909	-0.293456
ARL6IP1	-0.111556	0.437321	0.355001	0.00125523	0.88026	0.466291	0.804456	0.342407	-0.476352	-1.11922	-0.352191	0.346208
ARL6IP4	-0.963487	-0.279555	-1.05805	-0.816396	-0.306699	-0.258507	-0.321121	-0.872984	-0.0805298	0.893939	-0.163653	0.315774
ARL6IP5	0.534874	0.510791	-0.00960998	0.616028	0.560778	0.724382	-0.331045	0.0309347	0.97349	0.711837	0.936489	0.403907
ARL6IP6	0.406237	0.288537	0.722845	0.48919	0.071709	0.144224	0.32	0.0856852	0.56652	0.449903	0.152075	-0.620257
ARL8A	0.208124	-0.149419	0.303957	-0.405515	-0.770764	-0.167261	0.0218219	0.213237	0.954636	-0.129417	0.517896	0.139806
ARL8B	-0.106624	0.455085	0.128008	-0.300057	1.19398	0.903075	-1.51406	-1.42679	-1.35879	-1.19614	-1.76622	-1.12013
ARL9	0.594216	0.973265	0.606189	0.611862	-0.0844753	1.34172	-0.488818	1.09502	-0.291369	0.463592	0.475124	-0.79631
ARMC1	-0.058508	0.914676	0.110365	0.68229	-0.0157982	0.170635	0.551802	0.192709	0.13753	0.405837	0.72533	-0.401545
ARMC10	0.0309607	0.179974	1.87142	0.849687	-0.463319	0.142589	0.799217	0.632851	0.526816	0.117238	1.18983	0.0945595
ARMC12	0.0830093	0.0542119	-0.672275	-0.158826	0.373444	-0.466882	0.73497	-0.700929	0.671314	-0.0414194	-0.22705	0.544408
ARMC2	1.02574	0.985367	0.373396	0.113785	0.965126	0.47054	-1.42412	0.189051	-0.00697269	0.82019	-0.482532	0.0545869
ARMC3	0.383918	0.861152	0.305283	0.603924	1.74936	1.10644	0.978534	0.560422	0.509136	-0.476933	0.475105	1.05085
ARMC5	-0.413789	-0.487211	-0.487885	0.225094	-1.15009	0.903116	0.0519598	0.160299	-0.988938	-1.04433	-1.57749	-1.03536
ARMC6	-0.734141	0.216654	-0.53315	-1.22888	0.499442	0.375821	0.767176	0.0768461	0.27199	0.323307	-0.115091	0.730994
ARMC7	-1.9776	-2.82376	-2.51078	-3.26195	-2.40675	-2.32886	-1.67736	-2.67859	-2.63253	-4.35873	-2.31419	-5.3636
ARMC8	0.52414	0.0865757	0.49352	-0.250668	0.328622	0.476688	0.779784	1.85477	0.01824	-1.07473	-0.508097	-1.93067
ARMC9	0.169661	0.527567	-0.410389	0.101256	-0.506408	-0.906893	0.323216	0.204284	-0.112977	-0.898577	0.458389	-0.873313
ARMCX1	-0.375096	0.489703	-0.177929	-0.289812	1.38367	1.86871	-1.37793	-0.0449423	0.684946	0.795875	0.814033	0.312234
ARMCX2	0.39191	0.28663	0.486975	0.393819	1.81304	1.85739	0.260539	-1.38701	0.0318742	0.240763	0.834757	1.2073
ARMCX3	-0.0572685	0.48495	0.117733	1.2459	1.17621	1.72694	-0.866008	-1.21955	1.36276	0.914898	1.19519	1.72842
ARMCX4	-0.273355	-0.517414	-0.344113	-0.167598	0.839067	1.31269	0.198346	0.562025	0.661495	0.773127	0.346976	0.779126
ARMCX5	0.155742	0.518608	0.260449	0.33623	0.795233	0.788747	1.58532	0.891273	0.483495	0.384453	1.22327	0.282525
ARMCX5-GPRASP2	1.34982	-0.600544	0.752683	0.0631677	1.15397	0.304736	-1.85441	-0.480178	0.550189	-0.652569	-0.640877	0.326975
ARMCX6	0.0165314	-0.0431523	0.504327	0.180707	1.68125	1.82712	-0.0688485	1.57891	0.701277	0.518574	0.945546	0.982771
ARMH1	-1.01739	-0.430077	0.421386	-0.508615	-0.112143	-0.528386	-0.576784	-0.0734669	0.100747	0.639364	0.365923	1.39593
ARMH2	0.452684	0.12932	0.759531	-0.0974563	1.09522	-0.162516	1.48356	-0.731736	0.193792	0.865061	1.19541	1.40147
ARMH3	0.195683	-0.0121753	-0.671697	-0.199184	-0.304707	-0.386911	-0.550481	-1.04698	-1.51457	-0.974429	-1.33963	-1.24107
ARMH4	-0.376093	0.131535	-0.319885	-0.840841	-0.927834	-0.278617	-1.77193	-0.188916	1.78686	0.143711	-0.119888	0.0973598
ARMS2	0.353884	-0.0615209	0.452957	0.763591	0.657197	0.516786	0.013155	0.85781	0.0213733	0.321168	0.337937	0.111532
ARMT1	0.468529	-0.0925239	0.455157	0.26145	0.994705	-0.282324	0.354909	-0.30084	0.707321	-0.446847	1.56724	1.36181
ARNT	0.689006	-0.373566	1.46434	1.45018	1.40331	1.03417	0.238978	-0.448866	-1.19336	-0.580588	-0.758984	-0.964559
ARNT2	0.330311	0.350358	0.932068	0.736264	0.512084	-0.0054387	1.13129	0.806978	-0.368918	-0.657535	0.040982	0.443339
ARPC1A	0.384575	-0.115191	0.666139	0.555766	0.344187	0.68886	1.07034	0.0802296	-0.112273	0.825514	-0.780578	-0.593405
ARPC1B	-0.00793399	0.120877	1.69446	0.55333	0.0571998	0.0790604	0.27739	0.637691	0.369098	0.62431	0.757154	0.212701
ARPC2	-1.08156	-1.47617	-1.47836	-0.75244	-1.00631	-2.2063	-0.604008	-2.25557	-1.4448	-1.28853	-1.52594	-1.37945
ARPC3	-1.87578	-0.931999	-1.71217	-1.62605	-1.58686	-1.03415	-0.361505	-2.8136	-1.903	-1.51333	-2.05324	-1.93763
ARPC4	-2.22307	-1.82578	-2.06464	-1.44854	-0.683559	-1.63008	-2.2639	-0.689208	-2.65287	-2.33058	-3.49582	-0.200129
ARPC4-TTLL3	-0.251223	-0.239613	-0.851549	-0.005612	-0.369037	-0.550733	0.0661983	-0.720857	0.71266	-0.189431	0.0914847	-0.0674775
ARPC5	0.39638	-0.0455441	-0.070471	0.489636	0.544063	0.36042	-0.368338	-1.54943	0.0150266	0.605475	-0.101347	-0.571542
ARPC5L	0.0837633	0.345556	0.378568	0.124698	0.621408	0.459489	0.653978	-0.102574	1.00533	0.293418	0.434261	2.25622
ARPIN	0.0466959	1.05489	0.052692	0.491103	0.663528	0.486799	0.224528	0.269299	1.23602	0.739574	0.530036	-0.400336
ARPIN-AP3S2	-0.426465	-0.070278	-0.29475	0.430396	0.670444	-0.200048	0.955266	1.06229	-0.180297	0.958404	0.052492	0.564693
ARPP19	-0.58576	0.0682746	0.0895689	0.480989	0.106063	-0.634952	0.89185	1.27333	-0.0354477	-0.703435	0.716216	0.802666
ARPP21	0.759133	-0.447009	0.194242	0.324848	1.50237	-0.470517	0.340761	0.336175	1.34864	0.698595	0.854498	0.416985
ARR3	0.0194091	-0.0101133	-0.751586	-0.113614	-0.924124	-0.55204	-0.801973	-1.10036	0.919255	0.772746	0.139015	0.242083
ARRB1	-0.0966667	-0.062957	-0.741026	-1.22722	-1.9038	-0.277575	-0.348124	1.65694	0.259596	0.127098	-0.109026	-0.00137767
ARRB2	0.288209	0.811004	1.00621	0.91739	0.190142	-0.826902	0.53705	0.368212	1.13225	0.592994	0.708898	0.335589
ARRDC1	0.0531924	0.600076	0.118432	0.440011	0.579993	-0.0731164	0.462445	0.822778	0.07927	-0.0831544	0.0368625	-0.417025
ARRDC2	0.291043	0.021339	0.250708	0.100931	0.462806	0.265783	0.576565	1.17953	0.669984	0.686292	0.447062	0.898774
ARRDC3	0.767542	0.683465	0.291763	0.622945	1.44853	-0.485531	0.675977	-0.659259	1.49294	1.41047	1.08477	0.265168
ARRDC4	1.14463	0.281655	0.626979	1.47628	0.724017	1.22721	0.171198	0.516032	0.909515	1.06201	0.400262	-0.320246
ARRDC5	1.33485	1.33936	0.16997	1.41324	0.168124	0.00203542	1.6045	0.497723	0.106223	0.319913	0.0132177	0.0558804
ARSA	0.218235	0.144579	-0.618209	-0.585069	-0.071069	-0.554614	-0.211279	0.549575	-0.239637	0.825894	-0.458271	0.37242
ARSB	-1.00019	0.156391	-0.582569	-0.550274	-0.407448	-0.0758862	0.224256	-0.636449	0.905506	-0.367797	-0.297411	0.423737
ARSD	-0.567563	0.524087	-0.0518478	-0.0677263	-0.318477	-0.465166	-0.796386	0.621826	0.724786	0.24283	0.371142	0.434114
ARSF	0.822258	0.834039	0.165705	1.00852	-0.129231	1.16454	-0.134953	-0.508331	1.14007	0.96082	-0.141074	-0.291687
ARSG	0.0292126	0.330112	0.223805	0.475985	0.134452	0.18714	0.499453	0.356767	0.334871	0.205219	-0.0857568	0.134504
ARSH	0.171085	0.9481	0.396059	-0.223236	-0.244525	0.585093	-0.0203651	0.0753244	0.882212	1.08492	0.501445	0.133864
ARSI	1.20494	0.183084	0.920078	0.828124	0.596769	0.832644	0.531599	0.816351	0.83576	0.911878	-0.0204047	-0.0107738
ARSJ	-0.518469	-0.319652	-1.92294	-1.26862	-0.758344	0.617387	0.392778	-1.28849	0.64888	0.501932	0.0536966	0.199822
ARSK	0.108638	0.0643532	0.033054	-0.362362	0.691212	0.994709	0.388746	-1.43491	0.20894	0.864591	0.2637	-1.05005
ARSL	0.136299	-0.435557	0.478697	0.228131	0.773941	0.112011	-1.24044	0.856337	1.14594	1.25273	0.700502	0.827642
ART1	-0.246776	0.193419	0.148126	-0.426947	-0.179401	0.393674	-0.853883	0.223403	0.399843	-0.0565091	0.25468	0.636123
ART3	0.909764	1.00349	0.405849	0.625827	0.785212	-0.301597	0.0133966	1.54621	0.80081	1.03844	0.141447	-0.47397
ART4	0.881371	0.91182	0.977031	0.400029	1.8377	1.36893	1.20075	0.863557	0.513575	0.492739	0.383187	0.682265
ART5	0.273386	0.616229	0.770943	1.46148	0.816908	-0.0872659	0.583374	-0.519193	-0.310282	-0.0157315	0.296772	-0.029495
ARTN	0.42935	0.470563	0.94029	0.58933	-1.32442	0.435447	-0.391071	0.359438	0.809005	-0.133063	0.0791067	-0.47306
ARV1	-0.248003	-0.436933	0.0569463	0.0249539	0.351285	-0.969786	0.0605512	-0.173156	0.860893	0.554833	-0.453034	0.495025
ARVCF	0.0450756	0.0926215	0.00718173	-1.17307	-0.391519	-1.16968	-1.09641	-1.24528	0.778904	1.52864	-0.379779	0.0208404
ARX	0.335312	0.710448	0.403511	0.995075	0.454035	0.483572	0.767614	0.818358	1.04016	0.992225	0.264608	-0.405894
AS3MT	1.01427	0.849829	0.388441	-0.330685	1.2388	-0.346752	0.0312287	1.91677	0.611191	-0.0252716	0.46444	0.77961
ASAH1	0.52598	0.362211	0.0538801	-0.395113	-1.26435	-0.0945195	-1.04493	0.271274	0.140551	0.847435	0.356903	0.477171
ASAH2	0.399406	-0.157859	0.242824	0.560902	-0.236534	0.0246478	-0.239451	0.00129298	1.43317	0.66502	1.16936	-0.253492
ASAH2B	-0.108847	0.0435694	-0.954291	-0.715549	-0.959711	-0.705976	0.188864	-0.55285	0.706049	0.443103	0.520733	0.903721
ASAP1	0.398895	0.706812	0.735908	0.094173	0.367133	0.994116	-0.473163	0.489547	-0.238913	0.996967	0.216295	0.274635
ASAP2	0.776384	0.400187	0.738768	0.706342	0.755391	0.341484	0.743712	0.830646	0.29459	-0.858806	0.824962	0.476432
ASAP3	-0.314501	-0.12054	-0.0785781	0.25016	0.290393	-1.09847	-1.34677	0.607839	0.612736	0.536983	1.03977	0.839896
ASB1	0.449004	0.278824	1.02224	0.0702826	0.349631	0.110622	-0.905281	1.03037	-0.555603	0.264854	-0.475517	-0.12922
ASB10	0.311136	0.71894	0.790001	0.662875	-0.0531118	-1.08836	0.889495	1.55819	0.0990669	0.202206	0.0638489	0.043954
ASB11	0.543026	0.494378	0.48351	0.124074	-0.245235	0.4016	1.49775	0.69691	1.07208	0.700742	0.88048	1.26956
ASB12	0.695063	-0.244807	0.282125	0.186377	-0.202064	0.455261	0.626709	1.09558	0.521946	0.63735	0.100605	0.264756
ASB13	1.0363	1.41764	1.25643	1.38146	0.729199	2.33108	1.4834	0.576983	0.00516915	0.472853	0.122473	1.62948
ASB14	0.768819	-0.013414	0.363322	0.66112	0.00235046	0.82337	0.603079	-0.0878264	0.605285	0.390828	0.0668309	-0.59322
ASB15	0.910863	0.62924	0.227776	0.507164	0.437401	-0.106137	-0.0113811	2.27357	0.240089	0.558994	0.547678	-0.171766
ASB16	0.358783	0.0686122	0.111168	0.0902494	-0.311867	0.187283	-0.352716	1.04932	0.952465	0.60769	-0.0302564	-0.258519
ASB17	0.451457	0.481341	-0.90468	0.666177	0.90371	0.297669	0.240518	0.639456	0.481989	0.439546	0.882995	-0.877264
ASB18	0.60265	0.97729	-0.26967	-0.235288	0.564468	-0.0946114	-0.258951	1.04575	0.356913	0.59796	0.293217	0.337281
ASB2	0.920268	0.737665	0.577946	-0.459227	1.01846	-0.3433	-0.0349358	0.890706	0.751327	0.772344	-0.248909	0.90699
ASB3	-0.029422	0.6777	0.233391	-0.559052	0.504523	0.0320892	-0.57615	0.604099	-0.171496	1.00672	0.336519	-0.235746
ASB4	0.809736	0.587246	0.850749	1.68513	0.284626	1.11514	0.709603	0.129622	1.23925	0.572728	0.969334	1.3294
ASB5	0.237522	0.0945641	0.558833	0.13331	0.400664	0.959759	0.307739	1.03087	0.970283	0.242478	0.0989632	-0.793083
ASB6	-0.117485	0.165271	-0.778123	0.0764248	0.756339	-0.523545	0.474796	-0.64634	-0.426928	0.339179	0.212475	-0.417394
ASB7	-0.0167689	0.0376897	-0.587849	-0.607995	0.08346	-0.686999	-0.0894286	-0.495266	0.0268203	0.603328	0.707177	-0.667778
ASB8	0.443841	0.286145	0.403319	0.119879	0.107393	1.44126	0.809907	0.265883	0.188715	0.840858	0.525592	0.815204
ASB9	0.54571	1.15456	0.437612	0.015629	0.571303	-0.320767	0.601161	0.462803	0.662004	1.3012	0.718012	0.866023
ASCC1	0.587214	0.013535	0.361766	0.893102	-0.715498	0.501956	0.188939	-0.969647	0.877224	1.07521	0.499063	-0.0220037
ASCC2	0.451815	0.447008	0.850584	0.478841	0.544325	0.00667432	-1.7613	-1.94475	0.5116	0.533292	0.488095	-0.688788
ASCC3	-1.9223	-2.62743	-0.643564	-2.01566	-1.03292	0.40544	-1.56297	-0.880382	-1.70049	-2.4035	-2.72546	-2.18654
ASCL1	0.763018	0.346813	-0.487225	-0.175865	0.512024	-0.469333	-1.14083	0.328712	0.607651	0.75597	0.543915	-0.1439
ASCL2	1.17612	1.02336	0.690945	1.0245	0.344268	0.775837	0.520124	0.53023	1.3134	0.778048	-0.159731	0.994072
ASCL3	-0.0520524	-0.144718	-0.171383	-0.251873	-0.387144	0.182074	-0.0510164	0.278996	0.079886	1.38197	0.47293	0.534998
ASCL4	0.354697	1.2762	0.834524	0.0473529	0.264725	0.619164	0.489458	0.237132	0.655882	0.587603	0.143458	0.252559
ASCL5	-0.379492	-0.0296817	0.513457	0.730002	-0.733906	-0.47448	1.89501	-0.765263	0.608218	0.484619	0.731627	0.294494
ASF1A	1.10706	1.09683	0.861089	-0.161787	-0.446261	0.162914	0.520003	-0.6607	-1.84863	-2.38784	-0.708629	-1.8785
ASF1B	0.318989	-0.318068	0.0483057	-0.0679097	-0.91378	-0.285021	0.640661	1.3602	-0.0652547	0.578969	0.446136	-0.28965
ASGR1	0.441388	0.443269	0.513375	-0.146614	-0.0616488	1.05068	-0.676317	1.24786	0.899149	1.26096	1.21275	0.527705
ASGR2	1.02035	1.18102	1.46145	0.601461	0.224984	1.69152	0.789327	1.27553	0.31524	1.1741	0.38487	-0.2032
ASH1L	-0.216185	-0.587819	-0.670817	0.419889	0.0421864	0.687042	0.290481	-0.872692	0.573463	0.519066	1.06252	1.23317
ASH2L	-2.70014	-2.21416	-1.58699	-2.3743	-2.83158	-2.04439	-1.74479	-2.66029	-1.98358	-3.38659	-2.36316	-0.944402
ASIC1	-0.867803	-0.936804	-0.357561	-0.909487	0.259946	-0.365647	-1.39993	-1.477	0.179556	-0.400656	0.0145967	-0.731091
ASIC2	0.365418	0.412743	0.809526	0.554587	-0.186873	0.0698132	0.623825	0.151638	0.187484	0.572706	-0.0503247	0.465216
ASIC3	0.293601	0.342502	0.755103	0.603059	0.826102	0.194208	0.250227	0.535783	0.739885	0.527454	1.20158	-0.01555
ASIC4	-0.206116	-0.581794	-0.520225	0.192256	0.0728402	0.555086	0.347782	0.909048	0.469941	0.362554	0.227375	0.00399561
ASIC5	0.842065	0.784463	1.25905	0.37747	1.03281	1.26107	0.107253	0.627476	0.649975	0.34636	-0.783188	-0.122498
ASIP	1.42568	1.19458	0.814091	1.54325	0.918025	1.2134	1.57143	0.677678	0.469373	-0.594658	0.469035	0.779468
ASL	0.366366	0.218597	0.163876	1.07829	0.0712332	1.26902	0.151524	0.39324	0.428281	0.569708	-0.538919	0.57035
ASMT	0.55491	1.11413	0.307252	0.63974	0.744079	-0.134953	0.966455	-0.47932	-0.229917	0.579237	0.594838	0.311324
ASMTL	0.298513	0.461526	0.903495	1.25415	1.02009	0.842775	1.12155	0.253741	0.44827	0.456524	0.759026	-0.77449
ASNS	-0.573978	-0.4548	0.27908	0.367828	0.00126972	-0.0189244	-1.42804	-0.0409598	0.165996	-2.74127	-2.56814	-1.71716
ASNSD1	-0.623865	-0.530944	-0.11198	-0.964771	0.360781	-0.669718	0.47922	-1.96984	0.413319	0.424	0.0448792	0.749943
ASPA	1.2053	0.230979	-0.235817	0.625906	0.174395	0.470029	-0.0749486	0.579622	0.584944	0.382149	-0.306601	-0.113338
ASPDH	0.434692	0.468278	0.742178	0.431758	1.48067	0.370653	-0.425681	-0.354679	0.427049	0.144558	-0.131937	0.225409
ASPG	0.381066	0.822405	0.643259	0.399452	-0.0317734	0.310456	1.61658	0.323272	0.183242	1.69365	0.799964	-0.111362
ASPH	0.0344159	-0.21398	0.695565	0.550919	0.916957	0.473624	-0.257161	0.963297	0.228706	-0.0724019	0.788052	-0.446848
ASPHD1	0.950067	0.644276	0.75755	1.39642	1.22946	0.40352	0.862573	0.75247	0.739787	0.88564	0.293369	0.513775
ASPHD2	0.446371	0.713201	-0.0326223	-0.045411	-0.338511	-0.791993	-0.252653	-1.18109	-0.36749	0.507323	-0.270201	-0.255521
ASPM	-0.420178	-0.0917941	-0.874897	-0.382118	-0.557218	-0.0843592	-0.155699	-0.0880369	-1.50855	-0.72095	-2.03547	-0.741966
ASPN	1.11989	0.16848	-0.124757	-1.08482	1.37716	0.534394	0.174852	1.19117	0.496716	0.641287	0.268314	-0.181462
ASPRV1	0.258607	0.340056	-0.177489	0.173874	0.21337	0.953038	1.05101	0.386813	0.549113	-0.132481	0.482347	-0.270808
ASPSCR1	0.121441	-0.603868	-0.426147	-0.304825	0.284223	-0.207211	-0.190502	-0.76944	0.656508	-0.811855	0.443942	0.669031
ASRGL1	0.0881488	0.287908	-0.205071	0.575024	0.484764	0.85403	0.0125812	-0.351657	-0.092832	-0.292706	0.148065	0.929564
ASS1	-0.38606	-0.847519	0.51519	-0.561488	-0.465396	0.151884	0.863056	0.0684765	-0.8064	0.514682	-1.24121	-0.29783
ASTE1	0.246646	0.793292	0.454359	0.263462	0.483372	-0.668432	-0.727926	-1.00623	0.637908	0.401811	0.240366	-0.152824
ASTL	-0.240157	0.0311297	0.450482	1.13378	0.153143	-0.21529	0.668956	0.261998	-0.287555	-0.498115	-0.48985	0.64252
ASTN1	1.09998	0.957942	0.53257	0.600203	0.270351	0.506532	2.27943	1.75035	1.1919	0.987886	-0.159828	-0.582317
ASTN2	0.164027	-0.000270617	1.7474	-0.0332591	1.35125	1.7307	0.157201	-0.637582	-0.0377478	0.944558	-0.23191	1.33409
ASXL1	0.0865489	0.874994	0.797151	1.06587	0.463068	-0.114483	-0.119476	1.32633	-1.49753	-1.21012	-1.684	-1.25439
ASXL2	0.242381	-0.356218	0.627776	0.638142	0.713674	0.282001	0.145877	0.989684	-0.519772	-1.1636	0.0307353	-0.23098
ASXL3	1.64403	1.00604	1.35288	0.959599	0.238675	0.376965	0.551923	0.355569	0.66216	0.300703	0.451809	0.0540467
ASZ1	0.472005	0.344206	0.605089	0.752666	0.0378353	-0.0689718	-0.546223	0.136178	-0.501289	0.0292581	-0.233347	-0.977395
ATAD1	-1.14829	-0.566212	-1.36605	0.174178	-0.539556	-0.297908	0.309521	-0.567323	0.336963	0.00892746	-0.418354	1.25492
ATAD2	-0.502394	0.733328	0.458622	0.524247	0.958029	0.971259	0.492266	0.0744016	0.766856	0.868192	0.344253	-0.441887
ATAD2B	0.116752	0.141164	1.21469	1.12108	1.22333	0.973506	1.00153	0.700261	0.581208	-0.289575	1.69424	2.02281
ATAD3A	-2.42029	-1.37668	-0.504385	-0.948946	-0.163268	-0.10536	-0.724408	-1.11318	0.406278	0.0406079	-0.308114	-0.609567
ATAD3B	-0.650929	-0.251923	-0.805431	0.484107	-0.244956	0.400762	-0.582386	-0.248421	0.0944707	-0.469976	-0.393905	-0.555522
ATAD3C	-1.22123	-1.42496	-1.68761	-1.41943	-1.76458	-2.38768	-1.59897	-0.866087	-1.12287	-0.524577	-0.636982	-0.954381
ATAD5	-1.46902	-1.66015	-0.527733	-0.22114	-1.71877	-1.21145	-0.260476	0.468793	-1.06805	-1.47971	0.115891	0.590038
ATAT1	0.0220618	0.184602	-0.000644868	-0.380388	-0.827684	-0.0916924	0.372469	-0.0588161	-0.225829	0.379264	-0.486768	-0.565956
ATCAY	0.248248	0.675389	0.385333	0.255959	0.123544	-0.295079	0.656198	1.75796	0.205375	0.649541	0.41624	0.421846
ATE1	0.752795	0.359391	0.926705	0.277137	0.641994	-0.0300631	0.833643	-0.146718	1.12507	1.46453	1.10852	0.68552
ATF1	0.28208	0.305376	-0.11399	0.23111	0.467585	0.512537	-0.807106	-1.13291	-0.462192	-0.307514	-0.34336	-0.228936
ATF2	-0.263209	-0.485912	0.00804249	-1.22675	-0.134175	0.253976	-0.739266	0.0957385	0.699654	0.511662	0.360383	0.603542
ATF3	-0.82888	0.0640467	0.466569	0.570832	-1.53688	0.0841936	-0.727957	-0.653366	0.701062	0.65435	0.594062	0.464093
ATF4	0.0112437	-0.797553	-0.501663	-0.625995	0.501721	-0.978856	0.59793	-0.33765	-0.753396	-1.12486	-1.56678	-0.890968
ATF5	0.0862857	1.56289	0.616639	0.469828	0.0644746	-0.829006	0.904065	0.671105	-0.60976	0.428921	-0.142501	0.532126
ATF6	-0.355954	0.294234	0.47746	-0.725977	-0.160274	-0.996933	-0.688744	0.0468968	0.512969	0.000890485	0.146017	-0.376894
ATF6B	-0.014019	0.0273719	-0.28771	-0.1421	-0.671966	0.256386	-0.676167	-0.247234	-0.104058	-0.145768	0.934447	-0.346217
ATF7	0.635542	0.367314	0.795336	0.799277	0.918993	0.641817	-0.968124	0.406321	0.41905	0.548883	0.139089	0.0894421
ATF7IP	1.09722	1.41018	1.38533	0.491129	1.99967	1.95891	1.86843	2.70856	1.71029	0.295487	1.08476	1.18612
ATF7IP2	0.813492	1.14794	0.715282	0.635836	1.19202	0.898234	1.00771	0.109046	0.148412	0.140447	0.34673	-1.29368
ATG10	0.299768	0.637005	0.00479745	-0.530964	0.187158	1.17769	-0.0436631	0.546775	-0.679701	-0.352698	0.959879	-0.111675
ATG101	-0.111019	0.514271	-0.195391	-0.608781	1.69603	0.847718	0.142721	-0.393607	-0.0184476	-0.522877	0.169455	-1.02143
ATG12	0.55123	0.77127	0.0617177	0.074214	0.40633	1.73994	0.889842	0.158972	-0.112821	-1.40905	0.520997	-0.0975707
ATG13	0.411384	-0.362243	-0.173996	0.783111	2.50273	1.25206	0.513058	0.10652	0.604776	-1.53192	0.858167	0.265694
ATG14	-0.0127233	0.367397	-0.353078	-0.175553	0.210285	0.67017	-0.13222	0.583086	-0.384662	1.77617	0.650733	-1.42345
ATG16L1	0.337275	-0.373203	0.865132	0.688762	-0.0291824	0.258225	0.647395	-0.489098	-1.11333	-0.633556	0.261166	-0.456713
ATG16L2	0.887223	0.24987	0.3743	0.732596	-1.02657	1.11467	-1.28635	1.08475	-0.308267	0.332567	1.4304	0.1497
ATG2A	0.157891	0.496897	0.220334	0.315044	-0.024063	0.327124	-0.942063	-0.181503	0.578705	0.845645	0.315228	0.25418
ATG2B	0.00997866	-0.253663	0.614934	0.954202	-1.22856	0.7195	-0.709596	-0.58615	1.34563	1.02873	0.236981	0.201854
ATG3	0.423549	0.0947666	-0.684952	0.02127	0.192663	0.320894	0.245395	0.686598	-0.230308	-1.08061	0.594138	-1.30598
ATG4A	-0.450335	-0.943296	0.114799	0.754054	0.903649	0.63477	0.113791	-1.1665	0.752422	1.38853	0.925786	1.44497
ATG4B	0.148943	0.335335	0.125681	0.960621	0.264181	0.534904	0.589641	0.823733	-0.831121	-0.0393346	-0.0119561	-0.781086
ATG4C	0.736669	0.271168	0.150313	0.121567	-0.294596	-0.592485	-2.6817	-0.828027	0.722557	0.238897	0.31969	-0.610633
ATG4D	0.668356	0.588675	-0.48497	0.588963	0.532066	1.21086	0.369978	-0.0770932	0.425172	0.271186	0.596029	0.692187
ATG5	-0.220248	-0.0308945	0.673069	-0.405646	0.199437	1.06393	0.148187	0.341258	-0.347541	0.516024	0.419266	-0.928012
ATG7	0.0161429	0.400997	-0.194154	0.187357	-0.121277	-0.104462	1.3235	1.08339	-0.152055	-0.512789	-0.186962	0.266888
ATG9A	0.62376	0.5184	0.358336	0.0848133	0.951133	1.66454	-1.44181	-0.263269	-0.446623	0.88734	-0.668447	-0.727921
ATG9B	0.499555	0.557537	0.906932	0.390518	-0.19515	0.171861	1.04257	1.09575	8.39731e-05	0.216173	1.03385	0.558182
ATIC	0.406705	0.494481	-0.0449672	-0.909933	-0.581212	-0.776427	0.284532	-1.25096	-2.28321	-1.37713	-0.462961	-2.17062
ATL1	0.349969	0.166224	0.0257197	0.625015	-0.31293	-0.275853	1.42557	1.72137	-0.256712	0.277507	1.73054	2.08223
ATL2	-0.834681	0.251184	-0.210434	0.0195748	-0.00486587	-0.200985	-0.444958	-0.0971026	-2.67555	-2.90634	-3.56049	-5.26352
ATL3	-0.969902	-0.618437	-1.68343	-1.11962	-1.60374	-1.76007	-2.0652	-1.5161	1.03207	0.610419	0.390165	0.402841
ATM	-0.0845426	0.139697	0.827896	0.114312	0.198268	0.463493	0.0471432	0.135935	-0.798146	-0.282886	-0.107302	0.269134
ATMIN	-0.4602	-0.0802037	0.0597541	-0.439864	-0.0611891	-1.11919	0.649056	-0.344131	-1.37254	-2.31313	-0.609658	0.375661
ATN1	0.122216	-0.315861	-0.210076	-0.541104	-0.733342	-0.442206	-0.828441	-0.121985	-0.121817	0.58729	0.0176653	-0.3083
ATOH1	0.886482	1.22624	1.05213	1.26183	0.386671	0.390304	0.27884	0.732639	0.533525	1.02057	0.739606	0.601709
ATOH7	0.522964	0.284332	-0.0984333	-0.279122	-0.43251	0.556332	0.442907	-0.0110105	0.352414	0.180457	0.46773	0.310102
ATOH8	0.0488912	0.3304	-0.234442	-0.295865	0.407781	0.91098	0.46776	0.341096	0.590772	0.153788	0.325401	-0.546154
ATOSA	1.45977	0.889771	1.29851	0.480649	-0.403939	0.181053	1.58381	0.701507	0.611054	0.704254	0.594441	0.978421
ATOSB	0.373818	0.631188	-0.0698522	0.636308	0.298075	1.02598	-0.0565427	-0.608475	-0.104195	0.62422	0.221703	0.106116
ATOX1	-1.41993	-1.74606	-1.89021	-0.967706	-1.72538	-0.274748	-0.257965	0.258193	1.222	0.418677	0.464742	0.908241
ATP10A	1.04182	0.114283	0.965783	0.859119	-0.209431	0.343384	1.51239	1.94186	0.624374	0.205145	-0.600544	0.292475
ATP10B	1.01968	0.260362	1.01143	0.715801	0.329408	0.0630765	1.00544	1.29052	0.672076	1.52133	1.02483	-0.00677938
ATP10D	-0.482332	-0.238107	-0.0377456	-0.501331	-0.0433207	0.593243	-0.252798	-1.2966	0.518954	0.725974	0.950217	0.200532
ATP11A	0.572877	-0.0419499	1.0306	0.89656	0.47315	1.30376	0.478345	0.473601	-1.16125	0.255622	-0.948303	0.436857
ATP11AUN	1.00159	0.893303	1.02815	0.814342	0.395119	0.906976	0.9551	-0.723868	-0.223247	0.059914	0.0021645	0.197675
ATP11B	0.366849	0.395767	0.615181	-0.57244	-0.103851	-0.774671	-1.26665	0.135239	0.220745	0.784758	-0.137411	-0.526182
ATP11C	0.721156	1.18702	0.956103	1.65209	1.56522	1.74952	0.604664	0.959508	0.716298	1.45811	0.681347	0.486709
ATP12A	1.01562	0.966486	0.630334	1.00184	-0.215587	1.35483	1.28712	0.574781	0.129574	0.733781	0.0237195	-0.313309
ATP13A1	-0.364873	-0.192166	-0.088283	0.597897	-1.39882	-1.87888	1.45713	-0.649788	-1.40246	-2.19279	-1.57276	-3.2909
ATP13A2	0.222671	0.670506	0.912542	1.02133	0.392982	-0.17007	-0.670338	-0.43246	-0.0160869	0.295865	-0.551342	-1.17786
ATP13A3	0.2863	0.547382	0.19265	-0.538772	0.164092	1.70115	0.597281	0.931858	0.847632	-0.0310471	0.0170534	-0.12536
ATP13A4	0.31776	0.639238	1.5439	-0.662938	-0.363109	0.00220701	0.202211	1.83599	0.975349	0.250914	0.592625	0.47501
ATP13A5	1.06847	0.380382	0.178756	0.108665	0.780494	-0.160492	-0.292943	0.733318	0.737088	0.530496	0.675996	0.902641
ATP1A1	-2.41339	-3.39614	-2.39668	-2.75471	-1.69003	-1.9316	-3.28053	-2.84355	-3.96993	-2.08316	-2.74551	-0.830156
ATP1A2	-0.0297568	0.406225	0.0323913	0.391356	0.387699	-0.118767	0.739062	0.812886	0.10337	0.814754	0.721548	0.19135
ATP1A3	-0.0609973	0.0241074	-0.159157	-0.284284	0.577473	1.28483	-0.0797048	0.337162	0.265252	-0.343773	-0.10227	-0.0349678
ATP1A4	0.348804	0.610412	0.135295	0.13893	-0.469348	-0.0645188	1.24408	0.504069	0.873723	0.22323	-0.0122095	0.166928
ATP1B1	1.04151	0.552369	1.31295	0.873006	0.743999	0.220292	-0.353884	-0.0777893	0.787862	0.195111	0.216465	0.178186
ATP1B2	0.828826	0.84705	-0.151168	0.841093	1.14633	0.0285472	-0.0810486	0.190945	0.430609	0.330402	0.534555	-0.0162892
ATP1B3	1.15424	0.787034	1.08868	0.878875	0.379412	0.988417	0.712517	0.21594	-0.489769	-0.243898	0.540152	0.753781
ATP1B4	0.39924	-0.027321	0.596756	-0.110737	0.800435	1.38198	-0.640729	-0.814299	0.930619	0.786682	1.89233	3.46933
ATP23	-0.836726	-0.0841252	-0.798144	0.259456	0.0431159	-0.19067	1.24167	-0.515227	-0.650891	0.166643	0.143366	1.18669
ATP2A1	0.710218	0.0902608	-0.0179783	-0.124789	0.450567	0.42603	0.999809	0.0134022	0.167695	-0.636285	-0.167843	0.381589
ATP2A2	-3.40882	-4.75956	-3.30752	-3.15872	-2.14826	-2.43977	-0.63638	-2.63763	-2.70391	-3.46242	-4.01318	-2.77319
ATP2A3	0.742496	0.678713	0.526795	0.786072	-0.569639	-0.550263	-0.627306	0.245534	0.685141	0.392752	0.396953	0.339371
ATP2B1	-0.370649	-0.172922	1.99058	2.50854	1.67172	1.8798	1.3457	-0.535107	-3.80427	-3.08686	-3.23979	-0.597598
ATP2B2	-0.447881	0.615658	0.230605	0.0407582	0.696697	0.187814	0.383477	-0.255725	0.295681	-0.0376883	0.209658	-0.227075
ATP2B3	0.682566	0.648613	0.644359	1.16611	2.67835	3.37039	-0.0505936	0.491636	0.828113	0.838174	0.24948	0.562063
ATP2B4	0.383709	0.33047	-0.238017	0.695731	-0.248324	0.35184	-0.428094	-0.61576	0.755336	0.889152	0.466047	1.0033
ATP2C1	0.811346	0.864113	0.939933	0.229572	1.38337	1.09447	0.127863	1.51253	0.340132	0.544924	0.276918	2.17122
ATP2C2	-0.221194	-0.102699	0.619554	-0.246843	1.16393	0.550183	0.414581	0.588396	0.17385	-0.00142912	-0.420888	0.0312458
ATP4A	0.39651	-0.111009	-0.261887	1.17874	0.302208	0.301243	0.189075	-0.312746	0.135742	-0.457494	-0.099152	-0.435917
ATP4B	0.64717	0.3545	0.862244	-0.19224	0.127335	0.726343	0.207164	2.24605	0.368433	0.577157	-0.0587166	1.18071
ATP5F1A	-5.18552	-3.38108	-4.10971	-4.87042	-1.93512	-3.07933	-1.57997	-3.56233	-3.46376	-2.85512	-2.75761	-4.18901
ATP5F1B	-3.06432	-2.90219	-3.49342	-3.44379	-2.51522	-2.15347	-3.59323	-2.74965	-5.2774	-3.78542	-3.49753	-3.45196
ATP5F1C	-1.89536	-2.51212	-3.4761	-2.39065	-1.86533	-2.09058	-1.74813	-1.17406	-1.54125	-1.57498	-3.49053	-1.91233
ATP5F1D	-4.65011	-3.97371	-3.5707	-3.2237	-2.75819	-2.51515	-2.18448	-1.4866	-3.36616	-4.299	-3.1668	-0.325108
ATP5F1E	-2.75943	-3.11255	-4.82114	-4.38911	-2.05799	-2.82012	-1.79524	-2.96059	-2.74147	-3.05823	-3.94227	-1.93223
ATP5IF1	-0.51231	-0.035956	-0.565958	-0.319733	0.0226001	0.768626	0.654114	0.720173	0.846596	0.442969	0.104507	-0.603455
ATP5MC1	-1.83305	-2.43655	-3.31247	-3.11444	-2.14685	-0.569403	-1.73694	-1.72188	-1.66912	-1.17288	-0.719804	-1.80572
ATP5MC2	-1.14187	-1.07816	-0.571321	-0.682693	-0.999896	-0.633379	0.473256	-0.70067	-0.843541	-0.835968	-0.557431	-1.00898
ATP5MC3	0.197283	-0.507779	-1.04892	-0.480973	-0.49437	-0.445331	-0.483619	-0.423755	1.07361	0.66681	-0.0610481	-0.1568
ATP5ME	-2.09588	-2.78376	-2.14657	-2.04466	-1.52202	-3.46866	-2.11155	-1.22859	-0.950388	-0.784454	-2.09427	-0.874578
ATP5MF	-1.8848	-1.62114	-1.24307	-1.64801	-1.01653	-0.791196	-2.54777	-2.20215	-1.2402	-2.04773	-1.7263	-1.04534
ATP5MF-PTCD1	-1.23929	-0.906471	-0.954566	-0.961758	-1.23346	-0.682587	-1.12879	-0.82984	-0.914851	-1.88959	-0.466497	-1.25493
ATP5MG	-1.7125	-1.33009	-1.68561	-2.60667	-1.10714	-1.46607	-1.96871	-0.782585	-1.28961	-0.527015	-1.64165	-0.502258
ATP5MGL	-0.533931	-0.570704	-0.587766	-0.962806	-0.223303	-1.21989	0.0127473	-1.21534	-1.09978	-1.15054	-0.70133	-1.12186
ATP5MJ	-0.439576	-1.04164	-1.39438	-0.92471	0.182521	-0.291502	-1.33339	-0.306429	1.1008	0.0625155	1.72982	0.946053
ATP5MK	0.422067	0.15366	-0.0970886	0.737155	-0.00951343	0.026766	-1.36774	0.113368	1.03375	0.17387	-0.237261	-0.46473
ATP5PB	-1.79758	-1.89369	-2.07999	-0.911688	-0.82101	-3.2838	-3.98792	-2.21542	-0.950075	-0.79349	-1.08585	-1.72384
ATP5PD	-1.2187	-1.94184	-2.56108	-1.28953	-0.654545	-1.7037	-0.457094	-0.244001	-1.54197	-1.52451	-1.66819	-1.61336
ATP5PF	-2.04489	-2.2981	-3.15627	-2.61034	-1.86616	-1.34635	-1.13166	-1.18527	-1.59464	-1.103	-1.26503	-1.07409
ATP5PO	-1.30715	-1.66433	-1.03377	-1.58395	-1.49516	-1.28613	0.266957	-0.469024	-0.767087	-0.316372	-1.56508	-0.787838
ATP6AP1	-3.21715	-2.57652	-3.22337	-3.36414	-5.25739	-2.90366	-0.651555	-1.83474	-2.97421	-4.36409	-3.80782	-3.91523
ATP6AP1L	-0.236094	0.647756	0.047841	0.395234	-0.163663	-0.46106	0.763794	-0.515567	1.029	0.400111	0.730814	0.3278
ATP6AP2	-1.85516	-1.26003	-1.98811	-1.2693	-0.834762	-1.39068	-0.0556367	-0.476423	-2.95367	-3.21346	-1.85345	-1.5196
ATP6V0A1	0.413301	1.15729	0.570438	1.01022	0.38909	-0.591423	0.255028	0.507031	-1.19281	-0.835655	-2.14476	-2.87057
ATP6V0A2	-0.516143	-0.201255	-0.229437	0.0335765	0.41129	-0.138904	0.199554	0.524337	1.14725	-0.0724511	0.915556	-0.180905
ATP6V0A4	0.548214	0.384002	0.0554861	0.612989	-1.44711	-0.0552941	-0.454466	-0.26387	-0.505963	0.181916	0.203697	1.02249
ATP6V0B	-1.77517	-3.33303	-3.05947	-2.88361	-2.19705	-1.87749	-1.32949	-1.15831	-3.33487	-2.51445	-2.4422	-2.41512
ATP6V0C	-2.71828	-5.29143	-2.65879	-4.13732	-3.55442	-3.10201	-4.26212	-4.08442	-5.71121	-2.96719	-3.41546	-3.44997
ATP6V0D1	-3.12566	-2.18269	-2.63209	-2.22265	-1.96996	-2.1004	-2.39466	-3.34265	-2.97695	-1.68552	-2.07461	-2.20502
ATP6V0D2	0.767056	1.29947	0.238482	0.774281	0.208349	-0.205898	1.13371	-0.553157	0.435557	0.360921	0.523777	3.31823
ATP6V0E1	0.010776	0.451839	-0.0344043	0.9356	-1.06936	-0.483243	0.874546	0.0569339	-0.0287901	-0.220143	-1.13083	-0.380495
ATP6V0E2	0.0382213	0.508739	0.642077	-0.0940659	-0.444568	0.0896638	0.134945	-0.638068	1.19252	0.433507	0.15931	0.89758
ATP6V1A	-2.35934	-1.03609	-1.05249	-1.57742	-2.24685	-0.0770894	-0.350214	-1.39765	-2.88307	-3.89548	-3.05354	-0.964516
ATP6V1B1	-0.460123	-0.282697	-0.140718	-0.17592	-0.233972	-0.0412528	-0.169182	-0.59316	0.136166	-1.02279	0.0611846	0.171875
ATP6V1B2	-4.62839	-4.84604	-3.85945	-2.46031	-3.12354	-2.76456	-3.11187	-3.50535	-4.47884	-2.49007	-2.77501	-2.58769
ATP6V1C1	-1.08061	-1.85308	-1.43365	-2.22935	-2.70879	-0.757247	-1.74902	1.01405	-2.48955	-3.01975	-2.05608	-1.51899
ATP6V1C2	0.159024	0.635161	0.386433	0.80098	-0.0797451	-0.461816	0.981992	-0.144813	0.00813029	0.475314	-0.253504	0.060614
ATP6V1D	-1.68441	-1.15542	-2.42457	-1.41676	-1.61132	-1.94763	-3.3823	-0.369774	-1.94564	-1.41665	-1.11478	-0.807128
ATP6V1E1	-0.138774	0.393591	-0.623902	-0.358694	0.229722	-0.533207	-2.44268	-1.09386	-3.38298	-3.2204	-1.86394	-2.09812
ATP6V1E2	0.449361	0.561406	0.499185	0.204702	-0.137884	0.69556	-0.661822	-0.865537	0.711702	0.202531	0.738661	0.672073
ATP6V1F	-1.33718	-1.06426	-1.27893	-1.60294	-1.51312	-2.49452	-1.91708	-1.27667	-2.48036	-2.74462	-3.73351	-1.83472
ATP6V1G1	-3.63577	-3.20214	-2.32408	-2.76807	-1.67993	-3.53178	-2.0196	-1.15799	-4.16082	-4.44932	-2.73889	-1.5159
ATP6V1G2	0.455929	0.238321	0.168845	-0.716073	-0.507295	-0.469292	-0.179072	-0.0679627	-0.143488	-0.160061	-0.0786129	-0.145241
ATP6V1G3	0.282538	0.727147	1.57395	0.90167	0.658649	0.202644	0.50122	0.415694	0.260823	1.20173	0.817115	0.582106
ATP6V1H	-0.533036	-2.02043	-0.607071	-1.6669	-2.32529	-1.22167	-0.826297	-0.695052	-2.21691	-1.83548	-0.622517	-3.70655
ATP7A	0.135444	0.245463	-0.495557	-0.865313	-0.178624	0.407564	0.302923	-1.03544	0.90222	0.108916	0.899011	1.15746
ATP7B	-0.0794517	0.0488127	-1.65668	-1.25188	-0.51532	-1.28223	-1.8407	0.313057	0.81233	0.849381	0.182835	0.0528384
ATP8A1	1.06088	0.777632	0.848824	0.664369	0.765775	0.0822592	-0.345637	-0.381486	-0.271165	0.506182	-0.495541	0.303904
ATP8A2	-0.116718	0.173663	0.326826	-0.327332	0.301139	1.83222	0.76781	0.787745	-0.136291	0.489249	0.772489	-0.28922
ATP8B1	0.713745	0.448696	1.2877	0.610762	0.641047	1.19926	-0.192828	0.252851	0.669338	0.830524	0.911831	0.603827
ATP8B2	0.51655	0.685465	-0.225752	-0.516109	0.596789	0.0903992	-0.908769	-1.25935	0.758955	1.4497	0.578349	0.093863
ATP8B3	0.499069	0.719122	-0.308665	0.603347	-0.242569	0.271972	0.592449	0.054716	0.23482	0.312487	0.418718	-0.253012
ATP8B4	0.353652	0.523386	1.0894	0.128298	0.122677	-0.0878685	0.126429	1.16851	0.643658	0.974644	-0.279353	-0.663911
ATP9A	-0.0837222	0.418849	0.527593	0.560692	0.422621	-0.0949198	-0.00994672	1.15871	-0.285091	-0.403497	0.390127	0.847017
ATP9B	0.681773	1.03383	0.584051	0.385094	-0.437632	-0.138439	-0.924306	0.21913	0.104668	-0.356792	1.02992	0.339143
ATPAF1	-0.891085	-0.542657	-0.374858	-0.147969	-0.108521	-0.386482	0.0171714	0.102829	0.719466	-0.1234	1.2837	0.278161
ATPAF2	-2.10124	-0.744626	-0.0839131	-0.93616	-0.717675	0.752816	-1.07494	0.554837	-1.99786	0.0423794	-2.31324	-0.896981
ATPSCKMT	0.464363	0.788176	0.981926	0.498963	-0.240845	-0.324773	0.803686	1.1218	0.135832	0.737896	1.32676	0.114375
ATR	-0.74738	-0.946075	-0.0889457	-0.92319	0.584348	-0.784537	-0.897369	-1.17949	-1.52673	-0.481294	-1.06885	-0.501391
ATRAID	0.885639	0.558913	0.232448	0.331849	1.86214	0.193636	0.60021	0.173785	-0.236938	0.941561	0.413536	-0.550646
ATRIP	-1.51965	-1.5524	-1.24901	-2.21903	-1.81194	-1.00459	0.427083	-1.29642	-2.04206	-1.97327	-1.09787	0.77445
ATRN	0.231424	0.562627	-0.247889	0.0620744	0.122052	-0.225128	0.375882	0.243397	-0.952246	-0.723254	-0.991926	-0.843248
ATRNL1	0.00349239	0.528762	-0.338641	0.156293	-0.136771	-0.785007	0.314187	1.16426	0.183559	0.220645	0.623334	0.511898
ATRX	-0.414913	-0.88772	-0.0358811	-1.66355	-0.653093	-0.667308	-0.0669611	0.727879	-1.56014	-0.498697	1.50808	0.0321698
ATXN1	-0.103378	-0.07341	-0.0247737	0.435059	0.319387	-0.370468	0.0183793	-0.265824	-0.597008	-0.175406	-0.726007	-1.25946
ATXN10	0.148733	-0.896265	-0.329263	-0.160797	-0.476788	-0.330145	-1.3179	0.422639	-1.35212	-1.31986	-0.959894	-1.45873
ATXN1L	-0.0632054	-0.389382	0.792586	0.679225	-0.369158	0.715333	0.396628	1.46332	-0.253093	-0.494268	-0.467386	-0.0221885
ATXN2	-0.254673	-0.34557	-1.19492	-0.872754	-0.551915	-0.72005	0.164856	-0.183512	1.22513	0.880875	0.384114	0.493831
ATXN2L	-0.278926	-0.55237	-1.51519	-0.639278	-1.15755	-1.1391	-1.20518	0.559434	-1.66503	-0.875672	-2.05154	-0.97151
ATXN3	0.0942517	-0.0240098	1.5918	0.806954	0.925849	0.287721	1.95284	0.514624	-0.457048	-0.42204	0.434431	-0.878871
ATXN3L	0.826117	0.197122	-0.111947	-0.119342	0.582554	0.0658259	0.630378	-0.310513	1.19779	0.7147	-0.0742033	0.312703
ATXN7	0.451023	0.361434	1.43389	1.69579	0.553902	0.435079	0.59177	1.61954	2.19213	2.50972	1.91523	1.53566
ATXN7L1	-0.144959	-0.177519	1.03495	-0.54506	-0.523163	-0.61332	-0.0830266	0.355812	0.843623	0.425969	1.15084	0.290201
ATXN7L2	-1.64409	-2.20058	-1.27472	0.299693	-1.00762	-1.11996	-1.4065	-1.97081	0.00877767	-0.167309	0.246096	0.107879
ATXN7L3	-1.48528	-1.12792	1.13659	0.587391	-0.596274	0.779003	-0.350882	0.245809	0.00831022	1.42154	-0.473834	-0.627492
ATXN7L3B	0.274866	0.386947	0.366245	-0.0290119	0.514383	0.928118	-0.246138	0.83356	0.468963	0.616995	0.458446	0.0818655
AUH	-0.220657	0.663884	1.50803	0.894543	3.39535	0.230588	-0.29409	0.89124	0.904019	0.263766	0.0570397	0.0464132
AUNIP	0.176111	0.604127	-0.0199199	0.457461	0.957283	0.234223	-0.777029	-1.05846	0.942882	0.338486	0.966006	-0.398389
AUP1	0.585578	0.701047	0.842279	0.320701	1.39623	1.59597	0.282992	-0.161704	-1.95346	-1.09837	-0.466175	2.37833
AURKA	-1.78575	-1.12838	-1.75887	-1.09957	0.0673115	-1.27717	-1.53633	-2.74965	-1.03071	-0.414055	0.219547	0.615426
AURKAIP1	-2.45863	-2.6482	-1.78288	-2.24523	-0.99542	-2.68142	-1.17752	-1.90899	-1.40424	-0.610539	-0.738884	-1.36566
AURKB	-1.55829	-2.60146	-2.16354	-3.01698	-2.34969	-1.18827	-1.14833	-0.836526	-1.95248	-1.74211	-2.18958	-2.56025
AURKC	0.572289	0.655262	-0.074101	0.611365	0.216556	0.291582	0.28047	0.214969	-1.10386	-0.151584	0.157642	0.0348848
AUTS2	0.0405393	0.0785094	-0.048094	0.233143	-0.629906	-0.134766	0.684146	-0.482898	-0.13633	-0.258885	1.01545	0.0185802
AVEN	-0.434132	-0.0834292	0.796711	-0.0533866	0.161672	0.11773	1.47465	-0.0878426	-0.534421	0.742437	0.0197394	1.15523
AVIL	-0.514712	-0.159158	-0.541813	-0.725872	-0.012679	0.912798	-0.311691	-1.17374	0.381009	0.315833	0.88428	-0.0271921
AVL9	0.53766	-0.473473	-0.841759	-0.995059	-0.52401	-0.576001	-1.46614	-0.112773	0.441072	0.446816	1.14663	0.465287
AVP	0.851086	1.21284	-0.254049	0.445959	-0.528264	0.179439	1.17734	1.10563	0.201091	0.588498	-0.647477	-0.718468
AVPI1	0.767899	1.06585	0.869257	0.522334	-0.231141	-0.651886	0.387221	1.01614	0.646729	-0.012365	0.751235	-0.432306
AVPR1A	0.639068	0.259985	0.432304	0.190622	0.679256	-0.0697705	0.182024	-0.719902	0.262027	0.664998	-0.629248	-0.816339
AVPR1B	0.437094	0.493209	0.147106	0.0703407	-0.250318	-1.56949	2.01625	0.63107	0.357284	0.316721	1.32454	0.333869
AVPR2	0.72614	0.394487	0.786261	0.263785	1.75858	1.63841	0.958498	0.635813	0.931733	0.827325	0.479	1.70809
AWAT1	-0.0219314	0.650873	-0.472677	0.6034	1.38492	0.728059	0.68176	0.49905	0.757683	0.945587	0.13449	-0.193465
AWAT2	0.317653	0.0684798	-0.570138	0.495059	-0.267093	1.1649	0.350289	1.00225	0.737929	1.0579	-0.259668	2.13099
AXDND1	0.249314	0.363922	0.52553	-0.292694	0.0132324	0.0101326	-0.242896	-0.800344	0.211817	0.670948	0.922874	1.07623
AXIN1	0.160831	-0.236289	0.514227	0.204241	2.56524	2.59745	-0.288263	-0.406605	-0.0609421	0.416037	-0.153217	0.0720855
AXIN2	0.752898	0.832689	0.117701	0.362824	0.798943	1.54084	1.99028	0.567869	0.442246	-0.387347	0.0407022	-0.230522
AXL	0.542413	0.0457846	0.969358	0.538998	1.47424	0.940966	0.147145	0.174918	0.781603	0.72367	0.371218	0.20265
AZGP1	0.133171	0.579274	1.10306	1.39141	0.56965	0.80233	0.321027	0.00396413	0.473696	0.819832	0.183132	0.520356
AZI2	-0.444022	-0.0992709	-0.577233	-0.0704852	-0.646056	0.207199	-0.839736	-0.52167	0.250063	-0.741663	0.127641	0.580784
AZIN1	0.238225	0.258178	0.2683	1.33576	0.426573	0.559232	-0.342729	-0.565639	0.368413	0.512199	-0.543419	-0.0982672
AZIN2	-0.238368	-0.142719	0.146908	0.786281	-0.624038	-0.292246	0.314292	-1.1614	0.152538	0.917962	-0.209162	-0.274083
AZU1	0.673033	0.956903	0.299882	0.814159	0.429295	0.594346	1.65372	0.139011	0.0751862	0.0293879	-0.211355	0.716125
B2M	0.425108	1.43174	0.934983	1.49074	1.45595	0.572939	1.10602	1.20035	0.87963	0.603842	0.143048	-0.9792
B3GALNT1	1.01324	0.537851	0.573821	0.507714	0.566766	0.521729	-0.281878	0.792068	0.0138335	0.126047	0.166142	-0.171374
B3GALNT2	0.121963	0.0961508	0.519838	0.00551548	-0.173336	-0.981532	1.63364	-0.937982	0.489343	0.863227	0.151758	-0.613903
B3GALT1	0.721489	0.692685	0.183338	0.537295	1.36264	0.362707	-0.567302	-0.0177289	-0.207346	0.105417	-0.90224	-0.0740875
B3GALT2	0.548623	0.61732	0.474297	-0.264476	1.05812	-0.00422127	-0.201132	0.372017	0.303057	0.605185	0.475918	0.60259
B3GALT4	0.153654	-0.103738	0.844974	-0.985653	0.296199	0.0244476	0.39992	-0.413155	-0.598396	-0.846817	0.333248	-0.551883
B3GALT5	0.701171	0.430595	0.067468	-0.392283	-0.255455	0.429176	0.261838	0.818795	0.221236	0.759594	0.677357	1.69032
B3GALT6	0.331162	0.284153	0.123017	0.641102	-0.117423	0.618327	-0.99343	-0.946804	1.26035	1.03056	0.553672	1.04512
B3GAT1	1.11133	1.22624	0.833809	1.5924	0.430364	0.520381	0.181405	0.537466	0.468924	0.704814	-0.375714	-0.0644071
B3GAT2	0.227724	0.11769	-0.594339	0.229519	-0.3397	-0.130435	-0.987949	0.736848	0.505459	0.262543	0.245245	0.198144
B3GAT3	-0.597925	-0.016933	-0.609629	0.594806	0.455346	-0.275228	-0.954021	-0.495428	1.17981	0.917202	0.580334	1.42536
B3GNT2	0.383619	0.507363	0.265341	1.10866	0.647459	0.387138	0.288126	-0.238968	0.268153	-0.238015	0.0315957	-0.0298504
B3GNT3	0.966296	0.437945	0.421194	0.689626	0.962384	0.603599	2.02894	2.49584	-0.208226	-0.617988	0.0640985	0.138569
B3GNT4	0.221082	-0.684921	-0.189314	0.791443	-0.0395079	-1.42414	0.276892	-1.16822	-0.769258	0.177339	-0.0518034	-0.090847
B3GNT5	0.38732	0.030374	-0.392954	-1.4961	-0.912671	-1.43243	-1.56229	-2.43721	-0.54111	-0.0271685	-0.0119542	0.573634
B3GNT6	0.242452	0.0155815	0.615291	0.751513	0.669134	-0.0117791	0.192291	0.503373	1.26601	-0.296621	0.250653	-0.112381
B3GNT7	0.276039	0.660741	1.10243	0.659233	-0.0928772	-0.227477	0.870756	-0.728693	-0.318888	-0.135031	1.12055	-0.233896
B3GNT8	0.491939	0.171922	0.532873	-0.0464984	0.970651	1.19438	-0.190608	0.901067	0.176649	0.441783	0.140025	0.555069
B3GNT9	1.08258	0.545616	0.425731	1.10006	-0.601778	-0.849535	-0.523774	1.41556	1.05966	1.4306	-0.0623529	-0.528456
B3GNTL1	0.397624	0.317787	0.408434	0.364265	0.895322	0.448908	-0.269048	-0.197028	0.522592	0.381657	-0.339144	0.0434281
B4GALNT1	0.0397598	-0.076355	-0.427302	-0.134413	0.448712	-0.682138	-0.0105205	0.0932778	0.40706	0.220148	0.0662125	-1.49732
B4GALNT2	0.137862	-0.0688159	-0.48453	-0.305271	0.571747	-0.636014	-0.700567	1.19222	-0.0404214	-0.666393	0.0475133	-0.174623
B4GALNT3	0.496462	0.86954	0.370915	-0.0232085	0.672924	0.982228	0.836013	0.258339	0.746066	-0.337152	0.894057	1.07972
B4GALNT4	-0.409086	-0.283009	0.119812	-0.00909147	-0.0203793	-0.422699	-0.669598	-0.217458	-0.0998339	1.54967	-0.353325	-0.432405
B4GALT1	0.836263	1.15043	0.942078	1.0977	0.644293	-0.322808	0.0039747	0.767898	1.5259	1.80465	1.52458	1.09461
B4GALT2	0.295314	-0.328664	0.263859	-1.37867	0.757347	-0.231131	-1.36125	-0.00123247	-0.146265	-0.761705	0.0663241	-0.0532625
B4GALT3	0.335811	0.133028	0.192256	-0.189384	-0.557218	-0.392426	-0.101312	-1.30733	-0.104665	-0.249871	0.5674	-0.923222
B4GALT4	1.12053	0.686971	0.349338	0.135563	0.613565	0.742419	1.11286	0.933202	0.529887	-0.360169	1.21527	0.851026
B4GALT5	-1.18836	-1.23413	-2.07424	-0.573095	-1.31438	-1.13232	-0.0314026	-0.356941	-0.969771	1.0029	-0.00242022	-1.29099
B4GALT6	1.32601	1.01817	0.570411	0.639661	-0.209695	0.173883	2.21737	0.751806	0.0933637	0.710003	-0.239984	-0.131228
B4GALT7	-0.503135	-0.933817	-0.650027	-0.469261	0.440405	-0.520216	-0.506221	-0.640707	0.599065	0.218099	-0.0592102	1.73837
B4GAT1	-0.687935	-0.941271	-1.88556	-1.94531	-1.79859	-1.85653	-0.83806	-2.40629	1.14044	1.16133	-0.15189	0.379372
B9D1	-0.0657508	-0.471941	0.729638	-0.252266	0.573904	-0.861198	0.42817	-0.257467	0.191558	0.321108	0.195844	-0.973358
B9D2	0.043095	0.42953	-0.585484	0.504518	0.0110588	-0.0301305	1.60933	0.978725	-0.395068	0.0541586	1.08311	0.684284
BAALC	0.143367	0.43192	1.10966	0.364003	-0.295874	0.211468	0.551545	-0.126793	0.344298	0.5447	0.0221118	-0.236316
BAAT	0.75047	1.01624	0.845524	1.04363	2.25453	1.35009	0.959962	-0.180685	-0.0809796	-1.71829	0.451411	1.00485
BABAM1	0.497689	0.656872	0.410359	0.569653	1.11966	0.61514	0.854993	0.693381	0.230309	-0.238284	0.0637657	0.241273
BABAM2	-0.613284	-0.880293	0.0840779	0.42154	0.36798	-0.588359	-0.792687	-0.295657	0.983641	0.621804	-0.356521	-0.604521
BACE1	0.240666	0.0512591	0.190078	-1.08621	0.600217	-1.11486	-0.874796	-1.94297	0.0274442	0.131159	-0.193713	-1.36537
BACE2	0.574206	0.54611	-0.00738795	-0.218336	-0.528184	-0.202836	-0.0547761	0.308006	0.719212	0.156396	0.871914	0.314338
BACH1	0.558105	1.41442	0.777351	0.853905	0.82088	0.758781	0.787258	0.651452	0.855847	0.892373	-1.1623	-0.0963766
BACH2	0.768027	0.590493	0.11013	0.35761	-0.276701	-0.333046	0.627253	0.613068	0.192493	0.371591	0.819025	-0.346265
BAD	0.167071	0.305622	-0.0823126	-0.389559	-0.913498	0.0816096	-0.177985	-0.113113	0.735504	0.266858	0.297963	0.981363
BAG1	0.446703	0.304804	0.381071	-1.11341	0.261197	-0.0727242	0.483056	-0.10319	0.107637	0.0937754	0.762373	-0.199467
BAG2	-0.15168	0.483366	0.213998	-0.0759035	0.343018	-0.827045	-1.12064	-0.0959208	-0.124282	0.0165954	0.921513	0.566654
BAG3	-0.212147	0.803057	0.487497	0.180676	0.259342	1.21769	2.57462	-0.317677	0.282474	0.841082	-0.278029	0.072313
BAG4	0.417492	0.441866	0.0397751	0.271742	-0.0723896	-0.336723	-0.373808	-0.660522	0.236431	0.0973798	0.176427	0.312433
BAG5	0.324898	0.332023	-0.157554	0.225927	-0.226084	0.323937	1.72695	-0.737014	0.416722	-0.271546	0.144769	1.32869
BAG6	-0.0515669	-0.280542	0.136164	-0.403576	0.830155	0.101246	0.0424624	0.459307	-1.50252	-0.427968	-1.31253	-1.47373
BAGE2	-0.899263	-0.819809	0.846652	0.30786	0.588583	0.359173	0.461071	0.875958	-2.53513	-0.738263	-1.1779	-0.197093
BAHCC1	0.814489	-0.0371558	-0.0818836	0.399086	0.360116	-0.128214	-0.463641	-0.794565	-1.11253	-0.987715	0.421214	-0.516956
BAHD1	0.408639	-0.128565	-0.811619	-0.175621	0.221637	-0.862955	-0.2874	-0.0830831	-0.538352	-0.406159	0.265326	-0.156806
BAIAP2	-0.348236	0.154562	-0.386931	0.268105	-0.525623	-1.03591	-0.173637	-0.34258	0.262845	0.535932	-0.52417	0.386195
BAIAP2L1	-0.563934	0.176965	-0.110206	-0.384214	0.149574	0.106393	-0.93104	-0.388176	0.446862	0.719398	0.853685	0.374112
BAIAP2L2	0.434871	0.793682	0.359841	-0.0529962	0.144836	-0.0959983	0.197561	0.868398	0.658914	0.543291	0.0218682	-0.238838
BAIAP3	1.00547	0.672038	0.829079	0.112286	0.219842	0.591711	-0.226816	0.0784812	0.795333	0.507703	0.425336	1.05751
BAK1	0.0615315	-0.567588	-0.201001	-0.0915218	1.04414	-0.345506	0.0798026	0.796244	-0.103511	-0.0257548	-0.298697	-0.418205
BAMBI	0.687294	0.675337	0.287	0.0621134	0.159031	-0.263967	1.818	0.951187	1.48199	1.95749	0.878419	0.742693
BANF1	-4.60615	-3.39562	-3.28937	-2.47218	-2.34989	-2.13092	-2.24412	-1.27027	-2.31764	-1.8551	-2.21227	-1.60846
BANF2	0.840685	0.49604	0.597004	0.384518	0.52017	0.345038	0.501899	-0.659324	0.228307	-0.786511	-1.10967	0.966495
BANK1	0.393492	0.353038	0.487442	0.38009	1.6469	0.79083	0.159873	0.985346	0.908674	-0.163708	0.749439	0.752587
BANP	-1.40988	-1.87048	-0.90457	-1.21669	-1.32934	-1.51967	-1.89171	-1.62529	-2.40506	-1.90522	-0.961785	-1.25433
BAP1	-2.25622	-3.18968	-1.5563	-1.27601	-1.22237	-1.54825	-0.194066	0.379269	-0.521278	0.21594	-0.570252	0.0267823
BARD1	-2.74205	-3.72076	-3.00749	-1.47671	-2.44042	-3.42863	-2.13556	-2.91899	-1.45826	-1.11627	-1.26325	-1.00806
BARHL1	0.572493	0.586597	0.965481	1.13756	0.824711	0.796182	1.43539	0.608794	0.0676542	-0.255619	0.634055	-0.154822
BARHL2	0.739404	-0.340402	-0.590516	0.0189696	0.297429	-0.280151	-0.245429	-0.861279	0.613851	-0.038167	-0.171003	-0.880221
BARX1	0.226533	0.155079	0.343445	0.422169	0.647398	-0.460202	0.193741	0.483995	0.064386	0.528237	0.084076	-0.242088
BARX2	1.28621	0.676349	-0.535625	0.75408	-0.0882276	1.16748	0.713816	0.345969	-0.136545	0.246901	1.19562	0.366081
BASP1	0.851189	1.17157	0.664077	1.19279	0.154797	1.10346	0.472486	0.688475	1.34224	0.992203	0.349869	-0.180372
BATF	0.0291896	0.886525	0.164134	0.0695503	0.852294	-0.151916	-0.115686	-0.381681	0.542346	0.0734134	0.355202	-0.483025
BATF2	0.126231	-0.236548	0.0260167	0.223249	-0.687491	-0.0902299	0.274068	0.877285	-0.436707	0.587894	0.0226242	-0.0583657
BATF3	-0.472799	-0.952619	-0.365398	-1.57132	-0.268438	-1.50523	-1.30406	-1.29064	0.105345	0.976411	0.544823	3.1802
BAX	-0.00991974	0.798201	0.710827	-0.341742	0.959964	0.546527	1.05103	0.548944	0.207598	0.480302	1.00114	1.71989
BAZ1A	0.0237358	0.497208	-0.553061	-0.673182	-0.441624	-0.211873	-0.207504	-0.655196	-0.690555	-1.38256	-1.17536	-1.32076
BAZ1B	-0.39273	-0.361698	0.8876	1.61682	0.807855	0.443597	2.72153	2.06085	-2.05458	-1.71784	-2.84837	-0.352968
BAZ2A	-0.772553	-0.67861	-0.928605	-0.0924782	-0.11717	0.770158	-1.59134	0.572126	0.444221	1.1212	0.274195	0.418719
BAZ2B	-0.0410017	0.691152	-0.294723	-0.616982	0.847858	0.223213	0.983925	0.615885	0.293522	0.675578	0.982778	0.608418
BBC3	0.0110776	-0.20245	0.488707	0.499278	1.04856	0.52034	0.734592	2.11654	-0.150392	-0.70641	0.217562	1.59707
BBIP1	0.989348	-0.0201403	0.162099	0.0101059	0.58078	0.105658	0.290209	-0.0123542	0.00213173	0.399574	0.53985	-0.175028
BBLN	-0.887788	0.502896	0.0866464	0.0809937	-0.161044	0.441861	-0.433858	-0.786746	-0.438898	0.0424354	-0.896265	-0.272044
BBOF1	0.699101	-0.873749	1.00995	-0.30603	-0.95832	1.15177	0.350893	0.236338	1.11222	0.560067	1.35147	1.10142
BBOX1	-0.334461	-0.511519	-0.178259	-1.08705	-0.265482	0.412528	-0.233446	-0.0937677	0.754652	0.273843	0.350418	0.0144579
BBS1	-0.999011	-1.3229	-1.69801	-1.85741	-1.31248	-0.72293	-1.13195	-3.80306	0.185732	0.7589	0.535803	1.39565
BBS10	0.216586	-0.0306711	0.734533	-0.361969	0.453047	0.660978	0.883651	0.833624	-0.0753077	0.358573	0.683389	0.182963
BBS12	0.201781	0.024967	0.427629	-0.111838	-0.170563	0.211877	0.0175337	-0.257485	0.504226	-0.0540799	0.0216729	-0.219051
BBS2	0.493625	0.275001	0.460712	0.780648	-0.0868142	1.08281	0.98329	0.128845	-0.263068	0.291573	0.183143	0.781699
BBS4	0.345801	0.403124	0.495032	0.58836	1.04056	1.16646	0.310125	-0.223035	0.262829	0.73009	-0.0680842	-0.279907
BBS5	0.379679	0.563094	-0.213239	-0.293349	2.06358	0.0265331	0.742897	0.784346	0.610604	0.172995	1.06265	0.80767
BBS7	-0.253907	-0.120203	0.641032	-0.298956	-0.422751	-0.761863	-0.167854	-2.55183	1.00572	0.0755496	0.727599	0.31485
BBS9	0.805544	-0.622437	0.5197	0.234869	0.226315	0.670129	0.992592	-0.117614	1.14433	1.38276	-0.431704	-0.751035
BBX	0.977106	0.433478	0.627171	0.31572	0.487889	0.356681	0.866559	0.494776	0.570666	0.781336	1.07233	2.12601
BCAM	0.257602	0.55429	0.211028	0.10752	0.460689	0.981043	0.560454	0.811672	0.0779302	-0.320063	-0.331996	0.0909204
BCAN	0.176039	0.176073	-0.434534	0.294466	0.0636983	0.229403	-0.132084	0.40127	0.416644	0.353696	0.401189	-0.484475
BCAP29	0.374772	1.56507	1.67658	0.0577596	-0.20412	0.290274	2.16906	1.06284	0.467222	1.2523	0.529336	0.341076
BCAP31	0.00703198	0.554576	1.10834	1.18873	2.81929	3.476	2.01897	0.355375	-0.278128	0.750512	0.0213118	-0.22577
BCAR1	1.08866	-0.0321098	-0.0539763	0.145855	0.47932	0.842714	-0.213045	-0.341562	0.0990982	-1.07169	-0.267364	-0.382859
BCAR3	0.186297	0.329832	0.290507	0.178525	0.782006	-1.18043	-0.347917	-0.833548	0.736893	0.289452	-0.795687	0.132784
BCAS1	0.219645	0.506791	0.575086	0.463147	-0.921099	-0.12612	0.28962	-0.393219	-0.606239	-0.260317	-0.836928	0.218216
BCAS2	-0.47699	-1.26275	-1.15315	-0.559628	-0.636882	-1.47874	-1.48251	0.720821	-1.31273	-1.46403	-1.06777	-1.71744
BCAS3	0.487109	0.635602	-0.482027	-0.49617	-0.487636	-0.923214	-0.293367	-0.736658	0.474224	0.0337005	-0.0346547	-0.0536747
BCAS4	0.534644	0.12124	0.771768	0.712264	0.327593	0.454198	-0.235909	0.690807	-0.139224	0.647662	-0.00940149	-0.720743
BCAT1	0.162277	0.379985	0.330577	0.592159	0.236537	0.517194	0.869216	0.267631	0.15731	0.395346	0.72637	-0.0395166
BCAT2	0.473103	0.803291	0.808454	1.07473	0.307592	-0.152227	0.350259	0.181442	0.74634	0.520811	-0.118759	-0.0303621
BCCIP	-1.38489	-0.918729	-0.995679	-1.86105	-0.333692	-0.488187	-2.6826	-0.748006	-1.35329	-1.76084	-2.58724	-1.68091
BCDIN3D	-0.190322	-0.098336	-0.561366	-0.55258	-0.000458245	-0.15527	-0.407435	-0.0527614	0.291928	-0.40853	0.682992	0.358603
BCHE	0.574717	0.634927	0.302929	1.41146	0.095336	0.2896	0.911887	0.506206	0.774836	0.0533444	0.487698	0.470504
BCKDHA	0.695191	0.385789	-0.670762	-0.0250425	2.08092	1.64366	-0.0615707	0.499601	0.127821	-0.813354	-0.378702	0.657289
BCKDHB	0.221	0.0291742	-0.538706	0.245449	-0.19593	-0.12203	-0.959713	-0.68147	0.526445	0.830971	0.837991	0.117915
BCKDK	0.557287	0.567691	-0.0779236	0.248533	0.419637	2.57498	0.448161	-0.966668	-0.68635	0.619053	-0.452826	0.8649
BCL10	0.532446	0.852348	0.582263	0.381217	-0.648415	0.746586	1.5897	0.793525	0.153893	0.0549863	1.32305	0.483582
BCL11A	0.481537	0.142265	0.245214	0.753871	0.323238	-0.0531595	0.938748	0.569115	0.440877	0.0571582	0.178352	-0.0677902
BCL11B	0.504231	0.942724	0.619636	0.209557	-0.397225	0.0152556	1.48597	0.183336	0.205359	0.533225	0.286542	0.840862
BCL2	0.789904	0.828923	0.510955	0.572718	0.498737	-0.0356457	1.18278	-0.150111	0.278034	-0.182139	0.843474	-0.416385
BCL2A1	0.983367	-0.118774	0.224368	-0.139066	0.415947	-0.115575	0.571295	1.48307	-0.30506	0.0311572	1.28132	0.126074
BCL2L1	-3.51795	-1.26387	-5.92803	-4.08309	-4.14782	-2.78866	-1.7179	-2.31061	-1.40399	-1.91422	-2.25141	-1.94346
BCL2L10	0.677403	-0.311706	0.237813	1.09734	-0.188232	0.94928	1.16798	1.65402	-0.242317	0.31522	0.814033	0.0558378
BCL2L11	0.028106	-0.154327	0.204307	-0.235838	-0.0567694	-0.124654	-0.130121	-0.294452	0.826294	0.566465	0.719184	0.934667
BCL2L12	-0.0101063	0.398577	-0.501855	-0.106118	0.0386236	0.423089	-0.278743	0.280679	0.092597	0.906062	0.569461	-0.382455
BCL2L13	0.258346	0.690945	0.246971	0.13555	-1.07379	1.35052	0.240729	-0.577862	0.839574	0.831173	0.25884	-0.0725238
BCL2L14	0.463903	0.399834	0.584353	1.3819	1.19613	0.110846	1.33332	0.996824	0.655334	0.611917	1.46207	1.19109
BCL2L15	-0.385472	0.0623145	-1.01922	-0.338886	0.17623	-0.951607	-0.558725	-0.540757	0.730712	0.809811	1.10208	2.12317
BCL2L2	1.4579	1.13236	-0.185436	0.410483	0.623485	-0.94172	0.123213	-0.18054	-1.01614	-0.0888002	0.0295333	-0.22498
BCL2L2-PABPN1	-2.20508	-1.6388	-1.23782	-2.03727	-2.63177	-3.59368	-1.43571	-2.65236	-2.24097	-0.246515	-1.64658	-0.421247
BCL3	0.821696	0.633629	1.63847	1.61679	1.66809	2.12988	0.936075	1.47595	0.387111	0.576039	0.0421355	0.147326
BCL6	-0.689928	0.00124084	-0.739485	-0.286301	0.575941	-0.46392	-1.58951	-0.193271	0.209763	1.46791	0.493768	0.69395
BCL6B	0.0337463	0.237869	0.180747	0.660805	0.377638	-0.0239453	-1.07081	-0.280871	-0.498805	-0.275214	0.219434	-0.440437
BCL7A	-0.610166	-0.926104	-0.0993353	-1.26584	0.0254612	-0.375227	-0.0358569	-0.0088574	-0.281062	0.871749	-0.752858	-0.27811
BCL7B	-0.430222	0.306155	0.437584	0.364029	0.494684	0.389446	-0.208108	0.373377	0.527931	0.686449	0.70436	0.0211816
BCL7C	0.765932	0.643316	-0.0791968	0.73477	0.509947	-0.0485901	-0.35603	-0.607843	0.379366	0.495781	0.0874003	0.478152
BCL9	0.540471	1.18767	0.68077	1.24901	0.0111818	1.41023	-0.102565	0.830176	0.733724	0.549375	1.03291	0.0854192
BCL9L	-0.373052	-0.0714388	-0.338366	-0.650361	-0.0360479	-0.71525	-1.09481	-0.946011	-1.1907	-1.1929	-2.35031	-1.00392
BCLAF1	-1.30183	-0.633266	-1.11305	-2.14868	-1.48832	-2.73392	-1.07567	-2.01841	-2.30942	-1.24759	-0.493726	0.630011
BCLAF3	-0.188149	0.609269	0.69716	0.622945	0.270814	0.820755	-1.25913	1.99868	0.707751	1.14149	0.530433	0.523043
BCO1	0.46214	0.42631	0.831169	0.691696	0.0878152	0.314153	1.29708	0.716563	-0.140476	-0.774768	-0.353855	-0.688489
BCO2	0.589258	0.826118	-0.0438452	0.444596	0.166289	-0.669208	1.52538	0.936067	0.355994	0.282066	0.541344	2.59283
BCOR	0.820188	0.581039	-0.129489	-0.98919	0.863101	-0.621205	-0.850788	0.044938	-0.461625	-0.168047	-0.658123	-0.395446
BCORL1	0.867417	-0.112308	1.45864	0.887233	1.97225	2.70796	0.652664	0.945602	0.397477	-0.915533	1.27095	-0.824925
BCR	0.725935	0.540682	-0.104162	0.766002	0.899173	0.433608	0.729444	-0.84229	1.07942	1.16448	1.21793	0.636962
BCS1L	-2.24173	-2.04606	-3.07514	-3.04946	-1.42116	-0.564256	-3.84267	-0.354268	-2.37553	-3.8872	-2.81377	-0.891025
BDH1	-0.0291358	0.464902	0.712587	0.55836	0.299405	-0.208302	1.41923	0.302567	0.947986	0.628358	0.62774	0.143815
BDH2	0.0222995	-1.0479	-0.191376	-0.736719	-0.744936	-0.308076	-1.83142	-1.695	-0.52961	-0.359431	0.29872	0.633451
BDKRB1	0.183644	0.810848	0.812826	0.811565	-0.165918	0.627233	-0.340508	0.0300767	0.450949	0.679336	0.0616025	-0.839723
BDKRB2	0.860568	0.869099	0.741765	0.275376	0.423811	0.45522	0.268814	1.26192	0.326965	0.104583	0.717142	-0.176357
BDP1	-0.375658	0.117181	-0.451694	0.0493992	-0.988121	-1.20694	-0.169318	-1.56209	-0.508545	-1.09316	-1.24922	-1.01602
BEAN1	1.22973	-0.351699	0.188846	0.324374	1.25565	0.0356537	1.31037	-0.3999	0.203037	0.30451	0.422556	-0.980366
BECN1	-0.792308	-0.0253499	-0.664712	-1.10172	-0.479954	-0.2011	-0.569717	-1.9373	-1.52699	-0.992256	-1.83036	-2.89644
BECN2	0.124184	0.352797	0.294976	-0.574169	-0.707069	0.241802	0.199569	-0.0303723	0.653633	0.663678	0.246871	0.452778
BEGAIN	-0.198934	0.349392	0.635696	-0.311323	-0.467977	-0.0202133	-0.781317	-0.155256	0.391199	0.225306	0.418699	0.878447
BEND2	0.910275	0.071952	0.349289	0.224332	0.265955	0.527122	0.347329	-0.296134	0.322224	1.09071	0.343062	0.170311
BEND3	-1.81138	-1.74457	-3.46207	-2.29598	-2.41421	-1.49822	-0.813992	-2.06131	-0.617094	-1.25097	0.327216	2.6477
BEND4	0.27702	0.104685	0.573546	0.32406	0.204398	0.709021	-0.213513	-0.832285	0.452573	0.531503	0.63432	-0.260119
BEND5	0.381672	0.52697	0.69386	0.465583	0.479683	0.114993	1.02691	1.02286	-0.305686	0.49672	1.26555	-0.230441
BEND6	0.170847	-0.505078	-0.0641789	0.61464	0.147477	0.494521	0.42506	-0.441131	0.943664	-0.173639	0.102647	0.4857
BEND7	0.674643	0.48212	0.73951	1.00608	1.2238	0.774121	-0.298739	0.264539	0.472366	-0.387884	1.02735	0.386081
BEST1	0.0501742	-0.927091	-1.01287	0.578378	-0.455153	-1.6481	-0.0188401	-0.617605	-0.251235	-0.361601	0.633375	0.424618
BEST2	1.03962	0.381385	-1.35291	0.255835	-0.0541482	-0.888427	-0.0400846	2.99203	0.404616	0.239418	0.806186	-0.815856
BEST3	-0.516782	-0.528425	-0.372108	-0.285646	0.819429	-0.863833	-0.253478	-0.495185	0.319226	1.09731	0.469016	0.679351
BEST4	-0.539834	-1.23141	-0.0314617	-0.904038	-0.410956	-1.01756	-0.580423	-1.03146	0.836191	0.156915	0.7775	-0.203643
BET1	-0.334052	-0.3584	0.111305	-0.115577	-0.184318	0.102002	0.44268	-0.138769	-0.613828	-0.490577	-0.929299	0.264727
BET1L	0.00585126	-0.292825	-0.716853	-0.0858651	-0.749855	-0.564562	-1.14495	-1.66625	0.0501573	-0.287942	-1.26834	-1.25651
BEX1	0.352691	0.295089	-0.215577	0.00842639	1.55872	0.554044	0.304251	-0.312266	0.569258	0.772008	0.0224748	-0.226659
BEX2	0.0591778	0.392136	1.13527	1.15055	1.7617	1.25407	2.00478	-0.213858	0.587956	1.41345	0.937113	-0.0509881
BEX3	0.999979	0.04787	0.246033	-0.245009	0.802371	0.269031	-0.734177	0.128488	0.869283	0.392998	-0.553706	-0.922155
BEX4	1.01496	0.83191	1.05043	0.892499	1.56282	0.157542	0.272951	1.5271	0.503444	-0.460447	1.34676	2.98233
BEX5	-0.0563945	0.565276	1.10257	0.345767	1.38571	1.74657	-0.359924	-0.196737	0.493665	0.114697	0.516856	0.827756
BFAR	0.104513	0.0165528	0.315496	0.170266	0.821445	0.398638	0.169854	0.0772832	-0.816766	-0.803176	-1.3911	-1.02655
BFSP1	1.00591	1.15518	0.461729	-0.455716	0.346123	-0.346875	0.808699	1.3058	0.425035	-0.15863	0.455061	2.07655
BFSP2	0.584173	0.196909	0.818821	1.00391	-0.160718	1.23544	-0.514011	0.60601	-0.180903	0.391879	0.735749	0.972536
BGLAP	-0.0473193	0.0468857	0.0551946	-0.264607	-0.203032	0.113175	0.84539	-0.426093	1.03027	0.230909	1.28865	0.588261
BGN	0.425261	0.800148	1.01506	1.55831	2.51221	2.85196	0.492764	0.960674	-0.220313	0.0770885	0.597882	2.21614
BHLHA15	0.213972	0.0448575	0.88518	0.617784	0.456314	0.216534	0.557102	-0.362763	0.468748	0.151584	0.34344	-0.557825
BHLHA9	1.13119	0.983938	0.368962	0.712185	0.698733	0.798388	0.351693	0.793913	0.958294	0.19253	0.361536	-0.0856301
BHLHE22	-0.0701261	0.80955	0.811671	0.821154	1.19674	0.729305	1.38133	-0.463034	0.370349	-0.181267	0.875866	1.29173
BHLHE23	0.484681	1.25629	1.01036	1.20298	0.687381	0.793506	0.183775	0.747807	-0.101809	0.295456	-0.0561072	0.154632
BHLHE40	0.699842	0.563094	0.628849	0.587653	-0.463178	0.606132	0.652725	0.353739	-0.0665847	0.345487	0.530357	0.0330653
BHLHE41	0.804778	0.569976	1.00637	0.387059	-0.0413064	0.508942	0.749903	0.753328	-0.241789	0.698036	0.066604	0.833783
BHMT	-0.215342	0.596154	-0.460247	0.376684	-0.522477	0.0551918	0.0965023	-0.0213552	0.582323	0.670165	0.740136	0.389521
BHMT2	0.825427	1.01845	1.4257	0.894857	0.739684	0.308127	0.413992	0.69113	1.07682	0.241054	0.444812	0.385854
BICC1	-0.620414	-0.0113806	-0.651484	-0.507829	-1.07992	-0.00169449	0.747366	0.315388	1.54162	1.07143	0.797166	0.450489
BICD1	0.597897	0.787605	0.471959	1.08654	1.38591	0.220967	1.0261	2.11605	0.877126	0.254262	0.77266	0.31647
BICD2	0.588568	0.350335	0.621699	0.559251	-0.21669	0.398556	0.715507	0.153387	0.763258	0.585925	-0.217576	-1.37347
BICDL1	0.0778443	0.341292	0.867772	0.0556748	-0.435373	-0.648148	0.823194	-0.647635	0.21868	1.17213	0.811291	-0.119975
BICDL2	1.12319	-0.027669	-0.0922925	1.11282	-0.124088	0.197251	1.11538	0.40658	0.515512	-0.176704	0.00512889	-0.104296
BICRA	-0.674748	0.195141	0.408736	0.284282	1.81782	0.114993	0.47155	-1.50404	-0.032688	-0.506615	-0.917916	-1.84495
BICRAL	0.502954	1.08229	-0.0975946	0.586998	0.957182	-0.560926	-0.752055	-0.677568	-0.785159	-0.366835	0.684183	0.279639
BID	0.0279348	0.174974	-1.38247	-0.52182	-0.801876	-0.403232	-1.27642	-1.24563	0.18301	-0.517777	1.04756	-0.913797
BIK	0.711649	0.370773	0.711652	1.16787	0.782934	-0.295179	1.43026	0.0317603	-0.579581	0.698327	-0.0195122	-0.257603
BIN1	-0.127887	-0.0410643	-0.639632	-0.24231	-0.568389	-1.02721	-0.776863	1.13861	-0.503793	-0.471765	-0.20088	-0.805649
BIN2	0.39741	-0.15895	-0.268597	-0.177377	0.3161	-0.0849904	0.0482605	-0.435645	0.287569	0.434044	0.425827	0.410929
BIN3	0.131107	-0.204787	1.18881	1.7396	-0.130296	-0.704546	0.00320464	1.61112	0.663216	0.0383061	0.46461	-0.517838
BIRC2	0.464031	0.713045	-0.0629056	-0.139401	0.177016	0.509126	-0.627457	-0.593111	0.0362787	-0.242019	0.767062	0.282468
BIRC3	1.04222	0.657547	-0.815964	-0.277419	1.80979	0.010586	0.129811	0.542339	0.437298	0.129528	0.421743	0.346862
BIRC5	-2.18954	-2.96841	-2.80839	-2.66903	-1.42114	-2.98373	-2.64229	-2.51556	-3.62961	-2.93229	-2.06572	-2.39763
BIRC6	-0.258583	-0.223745	-0.476527	0.346763	-0.575728	-0.729017	0.252477	-1.04674	-1.75913	-1.79448	-1.59727	-0.594641
BIRC7	0.536535	0.266052	0.653847	-0.0370163	0.62171	0.283676	0.477982	-0.284077	-1.46	-1.10891	-0.760138	-0.311889
BIRC8	-0.216849	0.388534	-0.210241	0.227848	1.30753	0.290193	-0.715983	1.33219	-0.312492	-0.802796	0.538866	-0.0775986
BIVM	1.14376	0.986457	1.40084	1.36907	1.36734	0.375597	0.536869	0.267631	0.98192	0.656856	0.580259	0.373885
BIVM-ERCC5	0.772653	0.123965	0.206053	0.82084	0.0674688	-0.664816	0.568653	0.0907038	-0.256829	-0.481004	0.395989	0.281643
BLCAP	0.38331	0.682686	0.564718	0.675819	0.681131	0.36667	0.41973	0.572288	0.093618	-0.63454	-0.281811	0.900338
BLID	0.936139	0.842869	0.0378446	0.517304	0.261257	0.0189426	-0.230473	0.06226	0.687664	0.550874	-0.248663	0.0350839
BLK	0.781112	-0.137317	0.784473	0.0905167	-0.154376	1.46187	0.446017	0.876055	0.620912	0.820056	0.712093	0.243476
BLM	-0.524219	-0.476771	-0.497125	-0.180052	0.553398	1.05897	-0.390745	-0.706077	-0.653629	-0.196388	-0.642182	-0.019644
BLMH	0.437989	0.298423	0.341193	-0.0920668	-0.0991318	0.00202725	-0.474566	-0.424254	0.671568	-0.273604	0.786236	-0.719392
BLNK	0.530938	1.09415	0.0851702	0.823381	-0.452512	-1.31763	0.649252	0.0626971	0.370917	0.443327	0.510181	0.589441
BLOC1S1	0.0433838	0.344614	0.981073	0.172163	-0.208131	-0.0294053	0.167121	-0.81281	-0.136467	-0.0707175	-1.17926	-0.890769
BLOC1S2	0.184955	-0.365386	-0.0225379	-1.6435	-0.0966195	-0.0315603	-0.837108	-1.36781	-1.94603	-1.61808	-2.02185	0.291466
BLOC1S3	0.366407	0.840324	1.22618	1.12763	-0.0282065	0.197149	1.50349	1.80847	0.128364	0.764381	0.595972	0.493547
BLOC1S4	0.318726	0.438386	0.418334	-0.143795	-1.37462	0.288804	-0.408138	-1.00813	0.602527	0.222541	-0.132965	-0.335428
BLOC1S5	0.642391	1.13623	1.04529	0.703198	1.13038	0.306983	0.848863	-0.231112	0.752324	0.677748	-0.0818293	1.27624
BLOC1S6	1.01493	0.746832	1.43519	1.07224	0.569892	0.0828352	1.68256	1.16825	0.338567	0.301958	0.0877841	-0.366688
BLTP1	0.581489	0.111826	-0.450594	-0.331078	0.110841	1.13494	1.29678	0.759933	-0.282372	0.258501	1.03744	1.1403
BLTP2	0.144233	-0.714371	0.460327	0.562055	-1.34712	-0.970113	-1.19275	-0.856131	0.373342	0.366491	0.211511	-1.82263
BLTP3A	-0.014957	-0.279373	0.485627	0.0115155	0.021223	0.058027	-0.294871	0.354662	-0.0936534	0.525128	-0.609885	-0.0933773
BLTP3B	-0.0911848	-0.421065	0.377925	0.500326	-1.1714	0.126881	-0.137535	-0.765992	0.860482	0.0906854	-0.19065	0.109215
BLVRA	0.615761	0.218355	-0.0442934	0.2633	0.538256	0.868043	0.106211	0.17924	0.547998	0.393848	0.0432776	0.305397
BLVRB	0.168935	0.565951	0.181044	0.587679	0.645846	-0.215233	0.685294	-1.22605	0.156518	0.406307	0.0936554	0.159465
BLZF1	0.294531	0.488794	0.623541	-0.197585	1.65004	2.00528	0.0495288	0.834822	1.03273	0.163538	1.31656	0.83202
BMAL1	0.543563	0.996378	0.92951	0.694867	1.20636	0.142303	0.168903	0.365007	0.72375	0.415612	0.451222	0.660019
BMAL2	0.348308	0.111032	0.910837	0.773338	0.715186	-0.197341	0.952292	0.834547	-0.341517	0.301867	0.0988403	0.380907
BMERB1	0.616195	0.374352	0.435714	0.39526	-0.165851	1.34211	0.967648	0.086268	-1.05176	-0.471229	0.226562	-0.663655
BMF	0.217575	0.48225	0.483592	-0.409759	-0.393959	-0.318682	0.552874	1.2716	0.126134	-0.327914	0.0221793	0.233582
BMI1	0.716863	1.48464	0.689047	0.412212	0.598281	1.14627	1.21434	1.3568	-0.120918	-1.01928	-0.506755	-0.906505
BMP1	0.743902	0.236186	0.135289	0.0225512	0.393889	0.713107	1.59423	1.49003	0.824945	0.99869	0.726578	0.170027
BMP10	-0.145802	-0.136746	0.287902	-0.204764	-0.102638	-0.659709	0.50886	0.678503	-0.555583	0.384475	-0.267875	0.78423
BMP15	0.0488197	0.0775277	0.374287	0.792989	0.298538	0.205442	-0.146262	0.813825	0.263463	0.689536	0.951276	0.754051
BMP2	0.502264	0.693542	0.147829	0.637696	1.87056	1.18221	-0.0450371	0.962908	-0.023302	0.23018	1.04639	0.704796
BMP2K	0.982754	0.64947	0.0220209	0.643146	1.27176	-0.47446	0.0591168	0.633773	0.4496	1.77537	0.533213	0.798786
BMP3	-0.729925	0.113296	0.411349	0.160729	1.61032	0.468313	0.259286	0.775458	0.497322	0.778271	0.0617556	0.874538
BMP4	-0.623865	-0.911898	-0.564061	-0.678108	-0.994452	-0.453502	0.0562178	-1.70323	0.413221	0.913712	0.41607	-0.682064
BMP5	1.3292	1.17225	0.674637	0.159794	-0.274213	1.41491	0.430964	0.186801	0.95667	0.393781	1.42219	0.752701
BMP6	0.112852	0.448541	1.2561	0.464011	0.460548	0.221722	1.91796	-0.0822575	-0.475276	0.401475	0.267766	-0.227683
BMP7	0.39985	0.758934	0.221426	1.07981	0.943048	0.742255	0.326342	0.934691	0.336572	-0.685652	0.271075	1.02375
BMP8A	-1.11644	-0.473213	-0.0592316	-0.828841	-0.461585	-0.0510535	-0.693863	-1.41565	0.485372	-0.218219	-1.17727	-0.012508
BMP8B	0.380149	0.343198	0.333014	-0.212441	0.637841	0.0380579	-0.35157	-0.7866	0.333482	0.275045	-0.738449	-0.311029
BMPER	1.20055	0.956436	0.501467	0.542902	-0.0753637	0.0849187	0.983396	-0.206411	0.217237	1.05821	0.887098	0.307316
BMPR1A	-1.32399	-1.4762	-1.76819	-2.0919	-1.23365	0.0461223	-3.30378	-3.03053	-1.01959	-2.29211	-1.55323	-1.33725
BMPR1B	0.110657	0.4083	0.131122	-0.0629001	0.422319	-0.25128	-0.000977821	0.505267	0.813405	0.574025	0.293955	-0.340433
BMPR2	-1.73599	-1.89829	-1.2959	-2.80187	-1.25022	-0.544932	-2.38288	-1.30019	0.62277	0.340924	-1.19149	-0.425838
BMS1	-1.00159	-1.23985	-0.0182341	-0.0878721	-0.140508	-0.0734902	-0.430731	-1.02127	-2.31607	-1.55176	-1.25915	0.876641
BMT2	1.06354	0.833208	1.2236	0.941364	2.21602	-0.556207	1.18625	1.13851	-0.658597	0.722328	-0.383467	-0.08047
BMX	0.607199	0.606464	0.1463	0.00276964	0.262386	0.273402	0.17686	-0.459376	1.02068	0.80952	0.0430015	-0.137184
BNC1	0.22561	0.0575438	0.656239	0.33809	0.939398	-0.407133	0.411093	-0.0778865	-0.218006	0.135105	-0.827795	-0.799636
BNC2	0.591277	0.789812	0.771576	0.546282	0.921453	0.976938	0.517723	1.10236	0.267955	0.660524	0.523058	0.801927
BNIP1	-1.64424	-1.34607	-2.30461	-1.12376	-2.22205	-2.00487	-2.57932	-2.14808	-2.957	-2.06042	-2.73397	-0.920236
BNIP2	-0.305787	0.113426	1.17968	-0.302074	0.11812	0.298751	1.04654	1.83307	0.246478	0.0374226	1.08007	1.45677
BNIP3	0.521227	0.468901	1.08387	1.09574	0.923328	1.22774	-0.349919	0.314644	0.690735	0.92814	0.789356	1.0237
BNIP3L	-0.0552956	-0.189153	0.279339	1.02439	-0.391398	-0.0430606	-0.0961327	0.125283	0.49478	0.431158	-0.83689	0.49521
BNIP5	0.39284	0.162043	-0.332975	-0.167863	0.87399	-0.981409	-1.01797	0.0557845	-0.482493	1.0694	0.470396	0.546626
BNIPL	0.00854749	0.46085	0.198771	0.569758	0.10326	0.497973	-0.387206	0.258679	0.167744	-0.259869	0.327027	0.336286
BOC	0.37215	-0.157106	0.181779	0.387479	1.65514	0.0447885	0.67335	1.08664	0.386407	0.596953	-0.340713	-0.0710028
BOD1	0.0556254	0.600309	0.398314	-0.494991	-0.595851	-0.00736085	0.503092	0.113821	0.552203	-0.650936	-0.404985	0.0372445
BOD1L1	0.505893	0.602673	0.927888	-0.00847313	-0.135112	-0.273132	0.333242	0.61412	-0.321587	-0.156483	-0.168796	1.30979
BOD1L2	0.551026	0.237547	0.580613	-0.00469497	-0.0733998	-0.505978	1.12481	0.391217	-0.276035	-0.0366325	-0.666291	-0.630975
BOK	0.255701	0.286428	0.367235	0.454762	-1.20288	-0.00696049	-0.511124	-0.842031	-0.10488	-0.471586	-0.101962	-0.067378
BOLA1	-0.222293	0.142871	0.535238	0.296494	-0.43128	-0.221651	-0.56774	-0.321287	-0.145816	0.128962	-0.210315	0.437554
BOLA2	-0.301493	-0.44849	-0.160282	-1.18677	-0.446967	-0.555819	0.388928	-1.41889	-0.920112	-0.823173	-0.746126	-0.806758
BOLA2B	-0.806007	-0.554941	-0.794486	-0.697366	-0.05932	-0.221102	-0.840007	0.735018	-0.951973	-0.849747	-1.02025	-1.32623
BOLA3	-0.691896	-1.10935	-2.69894	-1.94872	-0.735056	-0.402456	0.416967	-0.913035	0.687567	-0.0553393	0.487566	1.22293
BOLL	0.576889	-0.13324	-0.578966	0.450649	-0.447693	-0.478504	-0.382532	-0.883814	0.436731	0.464867	0.0221672	-0.207547
BOP1	-2.48418	-3.92671	-2.56996	-2.75864	-1.50708	-1.00047	-1.40734	-2.86411	-1.55185	-2.096	-1.69245	-1.36058
BORA	-0.304534	-1.54339	-1.82847	-0.559235	-1.16312	-0.167696	-0.637679	-1.76994	-0.559514	-1.39856	0.698082	0.890672
BORCS8-MEF2B	-0.449159	-0.0227321	-0.675437	-1.32	-0.335284	-0.34475	1.30705	1.94818	0.49609	0.913824	-0.0324234	-0.533901
BPGM	-0.00206107	-0.271738	0.717868	0.583199	-0.234111	0.487085	0.61469	-0.495023	0.678765	1.48681	1.13464	0.327586
BPHL	1.17732	1.13353	0.520883	0.510439	-0.479671	0.921683	0.204627	0.949617	0.151987	-0.652525	0.348243	2.0747
BPI	0.624731	0.897692	0.946615	1.2067	0.156631	0.170758	0.704998	-0.0776922	-0.243666	-0.179858	0.899918	1.00502
BPIFA1	0.710985	0.873306	0.271122	1.23007	0.102514	0.358234	-0.253658	-0.572875	-0.333908	0.417223	0.270961	0.379954
BPIFA2	0.415243	0.57234	0.495802	0.508186	0.473976	1.04663	1.19682	0.478879	0.547861	0.554811	-0.300531	-0.0889138
BPIFA3	-0.0212413	0.997521	0.407829	0.477216	1.33358	1.04383	0.584069	0.173315	0.0188991	-0.0847246	0.719581	0.323848
BPIFB1	-0.254469	-0.0913397	0.586938	0.288482	1.48011	0.821409	-0.00392216	-0.545889	-0.571445	-0.212985	-0.0826613	-0.769102
BPIFB2	0.463647	1.22003	0.32912	0.486623	0.593039	0.956879	0.963873	0.658834	-0.203826	-1.06574	0.19886	0.251408
BPIFB3	1.09387	0.618566	0.201447	-0.167025	0.0155874	0.906649	-0.244418	0.0741588	0.320409	-0.298969	0.993519	1.0379
BPIFB4	0.179043	0.634901	0.173174	-0.214066	0.707645	0.545506	-0.411321	-0.63538	-0.781834	-0.538781	-0.0958807	-0.0845355
BPIFB6	0.570321	1.00983	0.749355	0.762622	0.277508	0.934879	-0.720784	-0.283846	0.704465	-0.396026	-1.09706	-3.61302
BPIFC	0.629076	0.0851681	-0.47606	0.970813	-0.793669	-0.100753	-0.885607	-1.62573	0.948417	-0.261458	0.847389	-0.16066
BPNT1	0.203765	0.218968	0.0548123	0.709932	-0.439769	-0.94552	0.274144	0.522135	0.882446	0.152582	-0.388572	-0.438148
BPNT2	0.610496	0.489781	0.889635	0.851364	0.333884	0.816588	0.744301	1.32468	0.942979	0.429481	0.133514	0.416643
BPTF	-0.574285	0.0484907	0.0169829	-1.08624	0.146933	-0.79712	0.101123	-2.09757	-1.08628	-1.0473	-0.943122	-0.350075
BPY2	1.45657	2.14747	-0.164665	0.776561	0.433892	2.19055	2.29091	2.22857	1.17557	0.659517	0.172043	0.249475
BPY2B	0.742803	0.462305	0.536475	0.15584	0.110176	-0.132417	0.326462	-0.126971	0.57935	1.28561	-0.627584	-1.49775
BPY2C	1.33388	1.49882	0.707115	1.6136	0.214298	0.299691	0.552346	0.686436	1.39051	0.576307	0.804484	0.64977
BRAF	0.77158	0.148571	-0.244782	0.560483	-1.37043	-1.13955	0.273072	-0.434155	-0.917002	-0.980401	-0.232288	-0.826005
BRAP	-2.09488	-2.47992	-0.669195	-0.994116	-2.19241	-0.336559	2.21843	0.202309	-1.87601	-1.35693	-3.04465	-2.29045
BRAT1	-1.13893	-1.37583	-0.982809	-0.461689	-0.273523	-0.599553	-1.20896	-0.342926	0.642915	0.556265	-0.349676	-0.483779
BRCA1	-1.86257	-1.30181	-2.21639	-2.3798	-1.37926	-0.603352	-0.401945	-1.50566	-2.38824	-2.40261	-0.13067	0.329989
BRCA2	-0.654584	-1.8303	0.109681	0.386981	-0.490096	0.0433974	-1.39049	-0.567727	-1.19808	-0.68894	-0.600979	-0.176622
BRCC3	1.04202	0.649912	1.49723	1.51757	1.23841	1.64522	0.663324	0.549559	0.580328	0.0341657	0.642375	1.26202
BRD1	-0.890471	-1.30186	-0.890215	-0.509873	-1.85686	-1.48613	-0.303047	-1.44045	-0.545217	-0.434947	-2.52124	-0.0142991
BRD10	0.195441	-0.0365092	0.190917	-0.0775358	-0.503847	0.111234	-0.558786	-0.634652	0.991699	1.59156	0.258387	0.782538
BRD2	-0.702349	-0.133551	-0.329318	-0.91064	-0.168121	-1.2348	0.523959	0.0308214	-0.967404	-0.814494	-1.91596	-2.87796
BRD3	0.188788	0.150261	-0.0936813	-0.199996	1.35381	1.74239	0.0895265	-0.691669	0.758779	-0.50033	-0.768212	-0.0446482
BRD4	-1.11133	-1.17518	-1.87044	-2.18366	-0.99544	-2.34867	-2.10385	-1.20678	-0.772173	-0.838272	-1.70157	-1.25126
BRD7	-0.637154	0.114499	-0.748451	-0.319262	-0.91495	-0.792115	0.487631	-0.126388	1.34823	0.798336	0.588976	0.546284
BRD8	-0.550236	-1.04673	-1.80688	0.282639	-1.19284	0.173046	-0.338583	-2.3111	-1.10433	-0.870505	-0.406177	0.259056
BRD9	0.605487	-0.300201	0.419516	0.662535	0.55737	0.358949	1.06224	0.00891791	-0.942409	-1.28662	-1.01203	-2.25818
BRDT	-0.801381	-0.0434068	0.0152668	0.725967	0.554346	1.11937	0.299827	-1.27039	0.791363	0.0553039	0.572582	0.887715
BRF1	-2.02452	-2.42696	-1.92761	-1.53134	-0.951223	0.246398	-1.07832	-0.172073	-1.9781	-2.64307	-1.10498	-1.96066
BRF2	-2.2359	-1.56307	-1.8511	-1.83933	-1.68717	-1.5267	-0.241888	-0.941932	-2.071	-1.73379	-3.0074	-2.54447
BRI3	-0.798442	-0.78623	0.280642	-0.559759	-0.792318	0.647292	-2.23929	-1.80128	0.667734	-0.384976	-0.699193	0.12471
BRI3BP	0.336286	0.00357035	-0.0432374	0.332017	-0.138156	-0.198638	1.32215	0.0304328	0.949492	0.921317	-0.0309353	-0.0697377
BRICD5	1.28271	0.906184	0.29637	1.08337	0.231255	0.807886	0.321329	0.718635	-0.101047	0.498599	0.643983	0.62903
BRINP1	0.0600441	0.655859	1.42581	1.24611	0.739079	0.761354	0.0766016	0.561102	-0.133044	0.348373	-0.150504	-0.264967
BRINP2	0.420917	0.538293	-0.109345	-0.0674564	0.116306	-0.0650417	0.311771	-0.336585	0.439312	0.624846	0.400319	-0.117844
BRINP3	0.746815	0.341095	0.180838	-0.519593	0.181573	0.126105	0.478299	0.392803	-0.0650591	-0.0879256	-0.31303	-0.687068
BRIP1	0.385324	0.00132654	-0.437229	0.606937	1.26215	0.101123	1.85454	1.03412	-0.038759	-0.845005	0.178497	0.0967202
BRIX1	-0.88697	-1.09821	-0.955363	-1.24271	-1.62023	-1.3096	-0.735642	-1.82378	-1.49169	-1.33932	-1.79899	-0.644636
BRK1	-0.225845	-0.248391	-0.436707	-0.139645	-1.6836	-0.726729	-1.68508	-0.400068	-1.46825	-0.822748	0.213364	0.705834
BRME1	0.656319	0.340996	0.0884782	0.806272	0.396147	-0.019384	1.3223	1.38124	-0.1394	0.499002	0.443753	1.49273
BRMS1	-2.25167	-1.56216	-1.92365	-2.01967	-2.79811	-4.07452	-2.17512	-1.23574	-0.0472258	0.100377	0.110019	-0.870427
BRMS1L	0.102813	-0.218343	-0.0223206	0.254075	0.714803	0.199539	-1.18656	-0.186633	-0.179221	-0.990556	-0.482702	0.237292
BROX	0.79297	0.696139	-0.29475	0.309979	-0.172039	0.435814	-1.00857	0.13226	1.17244	1.51386	0.460526	2.16766
BRPF1	-0.430426	-1.11633	0.153976	0.11673	0.240187	0.508268	0.289454	-0.593403	0.189634	-0.444364	-0.975438	0.640018
BRPF3	-0.262877	1.24	0.614356	-0.246345	-0.118423	-0.575265	-1.59895	-0.202484	0.754945	1.86453	1.10317	-0.326435
BRS3	0.802478	0.554135	0.727795	0.535697	1.97527	1.64812	0.472758	0.151541	0.829873	0.731946	1.70883	0.94982
BRSK1	0.387537	0.191579	0.75491	0.0146098	0.930526	2.22282	0.506701	-0.560378	0.468552	0.410758	0.356298	0.0851207
BRSK2	0.0448967	-0.616542	0.240517	0.102097	0.0854763	-0.866141	-0.956996	0.633903	0.0561031	-0.340709	-0.419829	-0.287199
BRWD1	0.164702	-0.00592688	-0.354371	-0.319367	-0.0121145	0.37625	0.0388688	-0.325982	-0.62922	0.515599	1.38602	0.627651
BRWD3	0.899772	0.43553	1.71596	1.22038	0.946556	1.40302	0.439238	3.39044	0.415158	0.783573	1.56783	0.933672
BSCL2	-0.215853	-0.357283	0.00261942	0.95973	-1.98022	-0.89862	1.40564	1.35081	0.198811	0.0413169	-0.351453	0.707653
BSDC1	-0.101078	-0.38198	-0.232462	0.39602	0.634211	0.115401	-0.0165148	0.0591842	0.0197284	-0.25808	0.383452	-0.307672
BSG	0.112931	0.472355	-1.34966	-1.56398	-0.996791	-0.492354	-0.209814	0.391654	0.585003	0.605677	0.472987	-0.675596
BSN	0.573107	0.41968	0.434587	0.680482	-0.362061	0.417471	-0.0148086	0.494064	0.501195	1.10682	0.581412	0.398036
BSND	-0.617399	-0.522218	0.288312	-0.806702	-0.248606	-0.867081	-0.179118	-0.521379	0.895061	0.922167	-0.255792	-0.578337
BSPH1	1.07642	1.44867	0.91521	0.413339	0.255369	0.37911	1.1405	0.257189	0.622457	-0.674222	-0.1988	1.6373
BSPRY	0.564877	0.129455	0.617711	0.133776	0.506903	0.781883	0.111405	-0.399739	0.80789	0.194431	0.388179	0.0444089
BST1	0.829286	0.459188	0.641719	1.18139	1.02902	1.19724	1.3155	0.215309	0.705619	0.744629	0.568629	-0.115968
BST2	0.220356	0.603166	-0.32654	0.233096	0.331162	0.533699	2.44628	1.2239	1.07764	1.37531	-0.0260567	-0.187525
BSX	0.619006	1.2012	1.0512	0.628788	0.0484571	0.25275	-0.18105	0.901342	0.271539	0.0683648	0.142254	0.36827
BTAF1	-0.449006	-0.54876	-1.07188	-1.84402	-1.14436	-1.02727	-1.59616	0.0863975	-0.394872	-1.18185	0.185613	-0.652212
BTBD1	0.924076	0.643238	0.428536	0.978254	1.04757	0.691413	2.48825	1.93992	0.431763	-0.0490023	0.386761	0.10225
BTBD10	0.68898	-0.456982	-0.86519	-0.169959	0.490288	0.739253	-0.387948	-0.41283	0.254038	1.46715	0.264645	0.561708
BTBD16	1.07276	0.524737	0.996033	1.17607	0.753334	0.39441	-0.495615	0.288094	0.534522	0.257226	0.372012	1.00722
BTBD17	0.624884	0.234426	-0.346616	-0.311506	-0.0306604	0.143733	-0.144933	1.00518	-0.0507834	-0.370615	-0.359301	0.0211531
BTBD18	-0.286747	-0.250287	-0.664492	-0.576894	-0.0938511	-0.321801	-0.451447	-2.17269	1.16579	0.613036	0.355258	0.471144
BTBD19	0.730382	0.766673	0.519673	0.646474	0.801967	-0.118121	0.806495	0.00953308	0.660674	1.23792	0.398314	-0.373119
BTBD2	0.341901	0.65895	-0.330995	0.277283	1.55092	-0.126119	0.976798	1.41492	-0.43084	0.0187204	0.227224	-0.734972
BTBD3	0.463417	0.498767	0.0929655	0.507059	0.778155	0.266804	0.540281	-0.138154	-0.30242	-0.880906	0.275745	-0.596333
BTBD6	1.32273	0.849595	1.08384	0.7987	0.486074	1.12932	-0.734706	1.00646	0.149678	0.312089	0.104003	0.326435
BTBD7	0.616093	1.14217	1.29867	-0.00629846	-0.514392	-0.00609644	0.151524	-1.6545	0.824495	0.564899	0.845479	0.472452
BTBD8	1.33505	0.843596	-0.390699	0.0608306	0.427985	1.77944	0.907055	-0.453402	1.45048	1.10514	0.975895	-0.37366
BTBD9	1.03451	0.70663	0.995291	-0.164232	0.146994	0.185588	-0.747102	-1.56478	-2.06103	-1.26658	-0.240608	-1.46267
BTC	0.792817	0.50796	0.294901	1.14717	-0.348673	0.338869	-0.836519	-0.564749	-0.0140528	0.447398	-0.0302035	-0.859538
BTD	-0.412946	0.368392	-0.239392	0.418631	-0.0555556	1.13236	1.9314	0.165885	0.645086	0.794287	0.329769	0.880394
BTF3	-0.884261	-0.481264	-0.88048	-1.05406	-0.672147	-2.98925	-0.833666	0.0607383	-1.33277	-1.05728	-1.15439	-1.24754
BTF3L4	-1.11059	-0.633007	-1.41616	-0.521349	-0.88896	-1.24843	-2.25696	0.707335	-1.2854	-1.02149	-1.17722	-0.263359
BTG1	0.00318315	-1.04016	-1.31856	-0.944806	-0.902045	-1.66219	-0.0979899	-0.0527776	0.800125	-0.904483	0.319028	-0.539672
BTG2	0.433184	0.32142	0.0516415	0.789425	-1.98958	-0.241786	1.01772	0.856774	0.421944	-0.145343	0.693733	0.294195
BTG3	0.755581	0.554161	0.227949	0.0252918	0.559911	1.2268	1.90935	0.684865	-0.366336	0.421294	0.430876	0.571544
BTG4	0.373568	0.817315	0.470172	1.38088	0.540615	0.200785	0.173568	-0.0226179	1.24277	1.44013	0.50865	1.01188
BTK	0.282913	0.0380871	0.172998	1.19182	1.80185	0.351636	-1.04816	-0.434414	1.38842	1.32326	0.968994	0.927048
BTLA	0.618291	0.447813	0.879625	0.66298	1.3556	2.26511	0.652544	-0.00722233	0.962753	0.890539	0.917806	0.716495
BTN1A1	0.266769	0.223734	0.607371	-0.468423	0.78503	0.245601	-0.0780137	0.218191	0.393937	-0.0347402	0.279206	0.292831
BTN2A1	0.328949	0.243359	0.0475385	-0.0247936	-0.616175	-0.148626	0.192774	0.920752	0.762827	0.0162464	0.802309	0.376088
BTN2A2	1.26485	0.76231	0.839254	-0.377454	-0.137682	0.50551	-0.101553	0.237666	-0.00482322	0.509985	0.179233	0.270243
BTN3A1	0.180416	0.560601	0.185992	0.294641	-0.12008	-0.514067	1.16662	0.291429	0.765702	0.330565	0.262641	-0.161818
BTN3A2	0.725322	1.13062	0.0207586	0.905023	0.517226	0.235347	-1.55023	-0.375877	0.398455	1.02182	-0.22584	-0.00679359
BTN3A3	0.499785	0.837883	0.435109	-0.616196	0.561	1.07441	-0.186818	1.17867	0.488169	0.341796	0.644644	0.216425
BTNL10P	0.560763	0.584286	0.475947	0.294704	0.515573	-0.451153	1.61779	-0.169204	0.138726	0.378145	0.071214	0.724299
BTNL2	0.275783	0.152496	0.261329	1.06671	1.82871	0.403009	-0.44524	0.00263665	0.275016	-0.0541627	0.282439	-0.187095
BTNL3	0.943704	1.1825	0.622689	1.6001	1.18238	-0.00164751	1.38979	1.06001	0.785046	0.178818	0.497947	0.288765
BTNL8	0.512895	0.418818	-0.206171	0.804989	1.23876	0.660487	-0.327578	0.499633	0.429553	0.0818932	0.341644	0.568758
BTNL9	0.18645	0.230138	0.148745	0.00267793	-0.738403	-0.0560642	-0.721328	-0.8713	-0.658773	-0.114068	0.214101	-0.336994
BTRC	-0.0435497	0.228717	0.193662	-0.138495	0.595297	0.00840242	-0.759378	-0.0182145	-0.265219	-0.0456269	0.747019	0.286078
BUB1	-0.228248	-0.297941	-0.955171	-1.2071	-0.291616	-0.926318	0.120857	-0.0718157	-0.970612	-1.79311	-1.76802	-0.159233
BUB1B	-1.06919	-1.62387	-1.2915	-2.58702	-0.992658	-0.275547	-0.700068	0.428694	-3.29712	-1.5605	-0.848349	-1.53479
BUB3	-4.071	-5.76876	-4.24088	-4.37942	-4.33977	-5.06501	-4.19856	-4.25861	-3.5727	-3.52438	-2.3834	-3.53185
BUD13	-0.135451	-0.635863	-1.68239	-1.14215	-2.13898	-0.311251	-0.594722	-1.93665	-1.55468	-1.46674	-0.0232941	-0.195998
BUD23	-2.69452	-3.16838	-2.33541	-1.40222	-1.62233	-1.17879	-1.66993	-3.20569	-4.39493	-4.99153	-3.30238	-1.99208
BUD31	-2.09411	-2.91258	-3.36885	-2.03072	-2.64447	-2.39953	0.305565	-2.54697	-4.59521	-2.93565	-2.55339	-5.07986
BVES	0.640116	0.936881	0.0149093	0.436396	-0.109985	0.771711	-0.286826	-0.737856	-0.0805298	0.535977	0.596691	-0.464105
BYSL	-1.12253	-1.43021	-2.542	-1.96648	-0.746347	-2.48798	-0.821571	-1.33017	-0.669804	-0.9581	-0.886905	-0.447218
BZW1	0.722332	0.764725	0.437612	0.119455	-1.34152	-0.431135	-0.335814	0.375789	-0.327728	-1.00223	-0.513165	0.654034
BZW2	-0.177569	0.531515	-0.599206	0.169622	-0.757053	-0.697111	0.826501	-0.322214	0.502095	0.0287347	0.190945	0.732203
C10orf105	-0.0491185	-0.336689	0.0709083	-0.315253	0.256357	-0.967785	-0.868243	-0.873696	0.0883137	0.952387	0.0276713	-0.705249
C10orf113	0.720875	0.757064	0.867249	0.707024	0.838301	0.0755776	-0.266939	-0.425397	0.913955	0.525732	0.0922127	0.18201
C10orf12	0.414016	0.336184	-0.370871	-1.27811	-1.26443	-0.788847	0.493036	-0.538393	-0.635166	0.0328818	-0.464417	-1.48029
C10orf120	1.06239	0.852218	0.892165	1.47376	1.1646	0.237962	1.01538	0.466624	0.107753	-0.499234	0.456801	0.543214
C10orf126	1.2832	0.503389	0.246325	-0.176187	0.789728	0.371981	1.49216	-0.2004	1.03465	-0.203501	0.779202	-0.753423
C10orf131	-0.0831907	0.0242607	-0.054782	1.25902	-0.440717	0.246255	0.180499	0.832896	1.37127	0.821174	0.949385	-0.165988
C10orf53	0.229439	0.495338	-0.0800493	0.57078	-0.0557451	-0.152883	0.41594	-0.829743	0.406454	0.186242	1.39413	1.22805
C10orf55	-0.0505114	0.282631	-0.0379876	0.159828	0.688531	-0.217351	-0.121001	0.073576	-0.031094	0.162471	0.722267	0.0628742
C10orf62	-0.688472	-0.188088	-0.47672	-0.339096	-0.307117	-0.833193	0.758268	-1.42211	0.846518	-0.573027	0.0316632	-0.0446482
C10orf67	0.739736	0.771062	0.0929919	0.554378	2.2517	0.811359	0.381846	0.467547	0.923969	0.274698	0.709862	0.729644
C10orf71	0.356895	0.323994	0.260771	0.442789	-0.605851	-0.550672	-0.690435	-0.624858	0.0275987	-0.299327	0.0516714	0.357623
C10orf88	0.502034	0.796279	1.0779	0.233704	1.31743	-0.0819632	0.560514	1.30019	0.22008	-0.182161	-0.219184	1.36579
C10orf90	0.599072	0.752078	0.757055	1.36817	0.202704	0.995056	0.86751	0.770698	0.443322	0.423844	-0.570554	0.206375
C10orf95	0.533928	0.703073	-0.351346	-0.310249	-0.0324508	0.70418	-0.248856	-0.736318	0.155432	1.26125	0.0220371	-0.213574
C11orf16	0.322639	-0.0355093	0.405106	-0.0656642	-0.0137456	0.584418	0.188803	-0.330231	0.225293	0.74445	1.14491	0.508799
C11orf21	0.443407	0.857802	0.309163	-0.127393	0.493333	0.589484	0.368227	-0.42265	0.434931	0.045804	0.235771	-0.639646
C11orf24	-0.455932	-0.574496	-0.342766	-0.552659	-0.179429	-1.27948	-0.586432	-0.789563	1.58837	1.09335	0.816718	-0.241997
C11orf40	0.0767531	0.734912	0.00969251	0.274841	0.433328	-0.332454	-0.533283	0.364829	0.936506	0.688104	0.734368	-1.29212
C11orf42	0.839407	0.22893	0.723148	0.35237	0.350075	-0.0820878	-0.332791	0.818099	0.530435	0.685196	0.317837	0.0426605
C11orf52	-0.0628757	0.0296157	0.164132	0.50305	0.780776	0.609972	1.42165	-0.635332	-0.449088	-0.174288	0.0275106	1.81101
C11orf54	0.812036	0.799785	-0.211451	-0.104331	0.837898	-0.612524	0.315953	-0.596268	-0.0497997	0.902058	0.490724	0.831878
C11orf58	-0.192852	-0.201307	-0.262602	-0.921828	0.769686	-0.551019	-1.41024	-0.298892	1.56603	0.280133	0.562295	-0.8701
C11orf65	0.025167	0.939607	0.433074	0.380562	1.15948	-0.179774	-0.930874	-0.28369	0.667578	0.880831	1.31802	0.611929
C11orf68	1.05191	0.99952	0.643149	0.402256	0.909537	0.362115	1.09447	1.09527	0.424428	0.754225	0.352195	-0.684637
C11orf71	0.352157	0.568288	-0.145244	0.155358	0.530957	0.190429	-0.14371	0.150214	0.817767	0.883246	0.0299788	-1.07927
C11orf86	-1.06725	-1.68827	-2.21513	-2.27555	-1.88479	-2.30169	-1.48566	-3.22965	0.396558	-0.477984	-0.0561923	0.737448
C11orf87	0.10567	-0.0353379	-0.252894	-0.624868	-1.54686	-0.566972	-0.596383	-1.02946	-0.628184	1.06756	0.0223472	-0.239187
C11orf91	0.800714	0.264325	0.974033	0.283674	0.473714	-0.336559	0.469632	0.918292	0.249099	1.05242	0.0664735	-0.551328
C11orf96	0.663322	0.928518	1.03464	1.53552	1.63913	1.37322	-0.0304967	0.773321	-0.268388	0.737382	0.88031	1.00328
C11orf97	0.274786	0.105622	-0.697355	0.170133	-0.59702	-0.497236	0.111828	-0.0700673	1.13238	-0.266155	1.22102	1.07531
C11orf98	0.701248	0.284527	0.052131	-0.263716	0.476053	-0.21855	-0.253561	0.298552	0.465462	-0.4736	0.424352	0.560329
C12orf42	0.459047	0.970927	-0.142588	-0.0147875	-0.22888	0.305186	0.813999	-0.308012	0.285834	-0.734326	0.569821	-0.111015
C12orf43	0.327091	-0.242366	0.721443	0.352605	0.967989	0.132437	-0.150716	-0.318975	-0.209967	0.408387	0.0377962	0.0309615
C12orf50	1.13903	-0.236886	0.422019	0.072547	-0.170343	0.0656339	0.31014	0.955591	-0.536787	0.101447	0.636778	0.683872
C12orf54	0.0355941	0.501545	0.0331365	-0.263061	0.519404	0.526999	0.40004	-0.197468	-0.571249	0.813725	-0.642787	0.48081
C12orf56	0.25751	0.288968	-0.100221	0.518378	-0.457714	-0.00575736	-0.240352	0.133475	-0.0584269	0.450239	1.248	1.25819
C12orf57	-1.33546	-0.398342	-0.518163	0.254798	-0.723039	-0.734287	0.506837	-0.565752	0.517213	-0.348515	0.119875	-1.6492
C12orf60	-0.61837	0.195808	0.183321	0.458561	0.646914	0.498463	0.810466	-0.0563715	-0.0441395	-0.573497	0.705192	1.19792
C12orf71	0.474432	0.488119	0.969936	0.810202	0.234057	1.18588	0.603094	0.889281	0.177686	0.414539	0.86556	-0.0192744
C12orf74	-0.760081	-0.490042	-0.747488	-0.915671	-0.732596	-0.0451339	-1.18472	-1.57048	0.41639	0.0825732	0.691312	0.260278
C12orf75	0.810886	0.878786	0.72455	1.14458	-0.116457	0.572387	-0.372208	1.05421	-0.183602	0.634599	0.613066	0.402798
C12orf76	-0.0162808	-0.343155	-0.801609	-0.481235	0.053149	0.33078	0.200113	0.538956	-0.451748	-0.461767	0.273041	-0.715625
C14orf119	-0.548191	0.356999	-0.0559206	0.406448	-0.349257	0.683549	-0.746438	0.419563	-0.342514	-0.76251	-0.741247	-0.848692
C14orf132	1.36416	0.52014	1.47041	0.582701	-0.496931	0.332986	-1.05512	-0.619305	1.35623	0.6212	-0.343549	0.596193
C14orf178	-0.648552	-1.5378	-0.617879	-0.586327	-1.22308	-1.2116	0.113957	0.118613	-0.437451	-0.685339	-0.808299	-0.189757
C14orf180	1.14463	1.28368	0.667047	-0.777776	0.95081	0.278161	0.840422	0.0623086	0.39734	-0.371421	1.07107	1.07463
C14orf28	0.606126	0.655885	-0.204384	-0.304747	0.839309	0.933858	0.310155	1.23533	-0.0601597	0.704232	0.475521	1.17456
C14orf39	0.395927	0.38453	-0.0288135	0.789058	0.641591	0.441677	0.391766	-0.369243	0.744071	0.823165	0.779202	0.412763
C14orf93	0.206121	0.0886065	0.235965	0.809416	-0.239049	-0.574612	0.510959	0.0910437	-0.0671518	-0.935015	-1.10765	-1.56197
C15orf32	0.662018	0.653652	0.374031	0.533339	0.527791	0.11534	1.54033	1.28782	0.446138	0.341864	0.0144895	0.947859
C15orf39	0.731737	0.333319	1.3561	0.792438	0.737547	0.276977	1.30825	1.37315	0.762612	0.808223	1.31705	0.871567
C15orf40	0.981911	0.764492	1.19195	0.394527	0.0979572	1.26459	0.698354	1.49764	0.652948	0.547765	0.175944	-0.680458
C15orf48	0.128531	0.65656	0.307903	1.41316	-0.798932	0.600045	1.75443	0.78802	0.332836	0.410825	1.27649	0.358532
C15orf61	0.0848366	-0.258831	1.52253	0.343199	0.289445	0.150188	2.12678	1.6121	1.14778	1.05506	0.102675	0.0585955
C15orf62	0.356941	0.418693	0.572886	0.979958	1.60193	0.377598	1.27081	1.26502	-1.45722	1.70242	0.207977	0.649485
C16orf46	0.702628	0.426726	0.822286	0.842901	0.858323	0.885916	0.247358	0.889395	0.194561	0.60051	0.665482	0.588674
C16orf47	0.414579	0.533748	0.889167	0.343854	0.713996	0.0568994	1.03807	-0.109795	0.0684952	-0.470669	-0.334019	0.851993
C16orf54	0.292147	0.334109	0.784088	0.552334	0.45956	-0.344056	0.426826	-0.220567	-0.799065	-0.3308	0.0428181	0.485728
C16orf74	0.163093	0.308388	0.92841	0.340265	0.338118	0.337787	0.720218	-0.10047	0.382065	0.59749	-0.785344	0.0858173
C16orf78	0.914569	0.418966	0.488817	0.61836	0.611347	-0.0938985	1.25541	0.558139	0.228657	0.648937	0.785575	0.382513
C16orf82	0.310668	0.522555	-0.049029	0.631592	1.3259	0.484328	0.705693	0.0801972	-0.732489	-0.068635	-0.131699	0.287884
C16orf86	-0.407144	-1.11818	-1.16453	-1.46555	-0.822059	-1.4836	-0.280844	-1.45555	-0.555876	-0.609913	0.275008	-0.255599
C16orf87	-0.0418834	-0.286255	0.569448	0.532788	1.06001	0.720297	0.953137	0.632187	0.45801	0.525486	-0.100523	-0.770524
C16orf89	0.139779	1.84892	0.591201	-0.00847575	0.609109	0.0417428	0.751307	-0.583625	-0.550205	-1.42276	-0.519121	-0.30204
C16orf90	0.569375	1.01534	-0.129693	0.379592	0.469016	0.178602	-0.378705	-0.504024	0.0610592	-0.167398	-0.152561	-0.680443
C16orf92	0.405447	-0.0436821	0.0156023	-0.611296	0.109067	-0.538069	1.30146	-0.752846	-0.225536	-0.663776	-4.52294e-05	0.903152
C16orf95	0.414834	-0.0912695	0.808784	0.16141	-0.0824046	-0.0463288	-0.0398279	-0.479579	-0.162558	-1.18429	-0.225688	0.628888
C16orf96	0.879147	0.974849	1.01429	0.959416	0.800556	0.585379	0.334571	-0.979506	0.144356	-0.152233	0.698592	0.529084
C17orf100	0.593322	0.521594	1.12757	0.647522	0.946919	0.929119	-0.154461	1.11382	0.582773	0.272271	0.914876	0.0371166
C17orf107	0.376047	0.575897	-0.0600264	0.753556	0.379372	0.340258	-0.283388	-0.176622	0.203736	0.29765	0.941745	-0.0276612
C17orf47	0.402498	0.176078	-0.384979	0.0202403	-0.662933	0.0681811	-0.0365816	0.811721	0.385957	0.198717	-0.00461747	0.250228
C17orf49	-0.368554	-0.473161	0.0149396	0.287947	-0.659505	-1.05049	-0.131268	-1.59062	0.720835	0.78241	0.601569	-0.0338448
C17orf50	-0.765525	-0.115658	0.397571	-0.081893	-0.589217	-0.508041	0.334057	-0.365461	0.202943	0.0734626	0.115269	-0.309053
C17orf58	0.359969	0.0851603	0.223648	0.62829	-0.701928	-0.2866	-0.00333329	-0.24942	-0.260232	-0.389517	0.337654	-0.811819
C17orf67	0.0611916	-0.418546	0.136051	0.12753	0.293518	-0.468066	0.380698	-1.51539	-0.578173	-0.389092	-0.823105	0.790228
C17orf75	-0.556702	-0.494041	0.266455	-0.0972703	0.241639	-1.31984	-0.333473	0.395766	0.321862	1.05443	0.638915	-0.388765
C17orf78	0.941046	0.240438	0.395289	0.254976	0.562451	0.127698	0.0627859	0.0092255	0.309525	0.329348	0.48923	1.13823
C17orf99	0.731302	0.876137	0.0628672	0.0365765	-0.263732	0.226257	-0.0843251	-0.349412	0.734526	-0.244569	0.519428	0.383068
C18orf21	-0.251581	-0.95519	-0.233067	-0.743269	-0.94713	-1.02304	0.782019	-0.622446	0.521633	-0.278189	-0.705471	-0.335075
C18orf32	0.714409	0.0226713	0.106114	0.200675	-0.345668	-0.929811	1.41365	0.82791	0.542541	-0.102986	0.112678	1.69558
C18orf54	0.118416	0.62202	0.379921	-0.233769	0.0991267	-0.0184566	0.870168	-0.130987	1.32464	0.103241	0.0386454	-0.045757
C18orf63	0.627568	-0.158768	0.870082	0.597662	-0.975116	-0.539519	-0.82823	-0.167606	-0.0466214	-0.402065	1.1221	0.764997
C19orf12	0.821543	0.0367289	0.68473	1.09524	0.0469993	-0.081093	0.825278	0.574539	0.353999	0.0906617	0.0784619	0.225395
C19orf18	-0.0833542	0.198751	0.373214	0.661277	0.484683	1.04606	0.223909	-0.281654	0.903237	0.430085	-0.919183	0.392137
C19orf25	-0.158938	-0.168377	-1.50383	-1.55607	0.666875	-0.62433	-0.470317	0.533516	-1.52883	-1.10179	-2.61352	-1.88788
C19orf33	0.769842	1.23104	1.00549	0.838866	0.869574	0.811012	0.588825	1.13147	0.609451	-0.0734689	1.01842	1.79608
C19orf38	0.94884	0.489261	0.361328	0.336191	-0.302612	1.02339	0.603924	0.26836	0.854928	0.408678	0.907822	0.147582
C19orf44	0.814029	0.326196	0.100153	0.0215556	0.875663	0.380499	0.846205	1.20046	0.312869	0.0674835	0.0212188	-0.19503
C19orf47	0.673365	0.739067	1.1301	0.439382	1.1916	0.793547	0.926034	0.652132	-0.279927	0.447331	1.27562	0.43346
C19orf48P	0.357976	0.405609	0.0898615	-0.654554	-0.245408	-0.252526	0.0868539	0.500831	0.433151	0.516941	-0.178605	-0.105962
C19orf53	-1.74077	-1.29631	-1.55482	-1.17037	-0.421965	-0.563581	0.510461	1.00424	-1.09228	-0.864801	-1.86642	-0.153046
C19orf67	0.874292	0.288386	0.509332	1.19106	-0.283657	0.526141	2.03377	1.46478	1.31596	0.0121776	0.0383213	-0.188297
C19orf73	0.200588	-0.00363114	0.205913	0.391147	0.811928	0.1278	1.21751	-0.180114	0.461237	1.04803	-0.70375	0.0152539
C19orf81	0.890597	1.10644	0.611249	-0.527768	0.0722151	0.517623	1.04875	-0.291911	-0.0222771	0.280903	0.726048	-1.10335
C19orf84	1.32031	0.784281	0.661244	0.747425	0.54739	1.13531	0.45624	1.03786	-0.0779872	0.434066	0.1832	0.427774
C1D	-0.463931	-1.05362	-1.54877	-0.0382923	-0.740842	-1.68174	-0.189174	-0.062928	-1.17795	-1.63072	-0.207214	0.706815
C1GALT1	0.111428	0.585091	0.773913	1.40855	0.209458	0.743951	1.55724	1.87371	0.791559	1.38358	0.900051	-0.103025
C1GALT1C1	-0.42465	-0.135291	1.24554	1.2728	2.11641	1.84771	0.626226	-0.251005	1.0812	1.24955	1.0071	1.20076
C1GALT1C1L	0.0135157	-0.293786	-0.434287	0.324222	0.115297	-0.298856	0.448977	0.184405	0.911041	-0.0319866	-0.665157	1.68762
C1orf105	0.721131	0.467525	0.2887	0.140408	0.24676	0.239085	0.814255	0.0630047	0.561572	0.960977	0.844666	0.566953
C1orf115	-0.214524	0.289412	0.174615	1.02872	0.481457	0.0601881	1.12768	0.71891	0.663823	0.0731986	0.235525	-0.056731
C1orf116	0.208055	1.55302	0.92269	0.024836	0.714904	0.99285	0.260102	-0.261317	0.474243	0.3118	-0.131046	-0.443266
C1orf122	0.823945	0.638615	-0.46968	-0.329009	0.597737	0.489557	0.842868	-0.675464	0.480189	0.266744	0.404592	-0.1792
C1orf127	-0.116335	-0.339052	-0.833949	-0.479585	-1.09418	-1.10088	-0.811077	-0.0435824	0.0404583	1.25264	-0.271411	-0.407941
C1orf131	-1.40733	-1.43322	-0.986796	-1.776	-0.841496	-0.306736	-1.19908	0.835988	-0.559123	-1.31606	-0.948076	-1.09228
C1orf141	0.681416	0.816691	0.321904	0.00997224	-0.500117	-0.201811	-1.85355	0.864852	0.341735	0.234193	1.9296	0.581395
C1orf146	0.687345	0.584234	0.53048	1.18713	0.199962	-0.0225379	-1.63585	-0.228329	0.581658	0.705239	0.0465867	-0.238601
C1orf159	-0.0123425	0.494378	0.518408	0.0242988	0.22075	0.243272	0.292399	-1.30652	0.329296	-1.52532	0.157342	-0.206571
C1orf162	-1.28006	-0.866347	-0.946151	-0.979129	-1.23046	-1.5297	-1.07592	-0.807289	0.197209	0.410177	0.440217	0.558993
C1orf167	0.520281	0.927921	-0.364683	0.127512	-0.711263	-0.728425	-1.00687	-1.38886	0.602097	0.394675	0.795767	0.720234
C1orf174	0.318161	0.559147	0.929263	0.949329	0.635038	0.119528	-0.32438	0.96532	0.53372	-0.0910393	0.418188	0.405428
C1orf185	1.06287	0.254163	0.600056	-0.778929	0.675243	0.384135	-0.604551	0.596199	0.363934	0.568031	0.701523	0.975734
C1orf198	0.0728352	-0.273997	0.114802	1.04598	1.35302	-0.695497	-0.405994	0.54705	0.531569	0.399485	0.0374488	0.281572
C1orf21	0.446601	0.370353	0.689817	1.27752	-0.221158	0.0342544	1.52085	0.377861	0.332406	0.549577	1.21258	0.606528
C1orf210	0.809582	0.785631	0.443222	-0.319576	0.278214	1.25541	-0.0793273	0.337259	0.431254	0.171423	0.621159	-0.618011
C1orf216	-0.161851	-0.802149	0.12719	-1.05218	-0.00565626	-0.470374	-0.281212	-0.841933	-0.278617	-0.0477027	-0.053441	0.0257872
C1orf226	0.164294	0.511206	0.139082	0.74939	0.456193	-0.435874	-0.263923	1.12049	0.565014	0.242205	0.896496	0.0403434
C1orf43	0.338307	0.215109	-0.116097	1.32133	0.0186804	-0.705057	1.59061	0.954474	-0.142725	0.751027	-0.375506	-0.158474
C1orf50	0.802708	0.509622	-0.10101	-0.0308722	1.57284	-0.977528	-0.503471	-0.47809	0.452944	1.44778	0.22921	0.485643
C1orf52	-1.45934	-0.692893	-0.69147	0.813347	-0.572119	-1.23202	1.24816	-1.54985	0.150754	0.375528	0.379178	0.429167
C1orf53	0.47226	0.513855	0.263675	1.10211	-0.38418	-0.180516	0.966349	0.879827	0.126981	-0.446019	0.808209	1.14934
C1orf54	-1.05973	-0.249715	0.495142	-0.0373936	-0.803086	-0.445862	-0.18632	1.43758	-0.280475	0.420556	0.116651	0.0980422
C1orf56	0.510442	0.659287	-0.212111	0.562526	0.677421	0.53325	0.0978612	0.433275	0.238686	-0.2373	0.953242	0.363024
C1orf87	0.0510508	-0.33217	-0.133606	-0.0877646	-0.12546	0.300243	0.115044	-0.159739	0.475554	0.274969	0.763621	0.933146
C1orf94	0.448365	0.512505	0.896977	-0.361995	-0.364763	0.222601	-0.813735	-0.482655	-0.367881	0.211185	0.0426555	-0.530404
C1QA	0.471877	0.960903	0.645872	0.380824	-0.00883999	1.01052	1.72182	0.505752	0.45666	-0.331829	-0.660013	-0.0191891
C1QB	0.749959	0.535202	0.0667447	0.529932	1.37443	-0.826514	0.33137	0.593528	0.187132	-0.158831	-0.101039	-0.480054
C1QBP	-0.618753	-1.17609	-0.719163	-0.318947	-1.41285	-1.33963	-0.894349	-0.755566	0.418228	-0.897347	-0.845248	0.629144
C1QC	-0.384169	-0.498871	-0.832299	0.467129	1.58066	0.401967	-0.0964497	0.612097	0.39024	0.536156	-0.715796	-0.0573991
C1QL1	0.781879	0.206666	0.304372	0.254227	-0.107162	0.289661	0.30481	-0.370221	0.51645	0.680991	0.336198	-0.176967
C1QL2	0.338187	-0.280645	-0.341363	-0.858763	0.562512	-0.356863	-0.961269	0.68956	0.227556	-0.597319	-0.337064	-0.471042
C1QL3	0.865807	0.673051	1.1576	1.00888	0.428065	-0.343606	0.997725	1.27603	-0.354816	0.095993	0.374016	-0.442854
C1QL4	0.228539	-0.285762	0.316607	0.199409	0.343139	-0.166707	0.407333	0.528611	0.554765	0.627039	0.296186	0.41191
C1QTNF1	0.0989771	0.125328	-0.0572763	0.441688	0.119411	-0.472356	-1.14166	-0.46917	-0.399762	0.0667252	0.576458	-0.536701
C1QTNF12	0.426181	0.572262	-0.368011	0.663268	0.186735	0.967419	-0.132069	-0.148013	1.09733	0.300064	0.730227	0.7585
C1QTNF2	0.393893	0.474069	0.6888	0.60188	0.631409	0.688656	0.24686	-0.54529	-0.401287	0.425365	0.645476	-0.0904205
C1QTNF3	-0.250533	0.00645821	-0.093475	-0.481969	-0.581394	-1.12907	-1.50617	-0.957052	0.0180151	-0.343035	-0.24507	0.754748
C1QTNF4	-0.349821	-0.753378	0.145805	0.576858	2.24848	0.260267	-0.717659	-0.645515	0.532782	-1.1115	0.498401	0.578865
C1QTNF5	-1.32511	-0.382058	-1.00467	-0.179701	0.0730176	0.252444	-0.0993488	0.0704839	0.214342	-0.306754	0.178945	-0.458632
C1QTNF6	0.505893	0.0781692	-0.449577	-0.168083	0.70946	-0.453727	-0.568404	-0.807127	-0.133357	0.331892	-0.202581	-0.349376
C1QTNF7	0.630072	0.0689109	1.14047	0.716246	-0.166434	-0.195854	0.657874	-1.43117	0.278134	-0.311093	0.0385531	-0.16782
C1QTNF8	0.720568	0.845596	0.819866	0.897058	0.490107	1.24598	0.200853	-0.429072	0.713012	0.756417	0.02226	-0.236424
C1QTNF9	-0.272844	-0.196217	0.530453	-0.026232	0.20228	0.178642	0.0258534	-1.06714	-0.532485	-0.488698	-0.063633	-0.023283
C1QTNF9B	-0.512949	-0.187231	-0.265517	1.21954	1.09929	-0.276174	0.582378	0.150716	-0.00897742	-0.202069	0.460545	1.47468
C1RL	0.921802	0.579533	0.791816	1.25873	0.895403	1.35702	0.570268	0.298519	0.373713	-0.103382	1.03703	0.799553
C1S	0.161256	0.751299	0.835486	0.140861	-0.740016	0.130701	0.619023	-0.477507	0.408351	-0.0456157	-0.0938575	-0.432235
C2	0.00262602	-0.061565	-0.154507	-0.455611	0.702483	0.394042	-0.541165	0.489224	0.267244	-0.461476	-0.444903	-0.767752
C20orf141	0.32096	0.498741	0.332194	0.223574	1.01063	0.710635	0.682213	0.446598	0.203837	-0.37406	0.590205	0.120488
C20orf144	0.182467	0.529411	0.31919	0.614875	1.30463	0.952609	-0.521763	0.0500699	-0.612811	-0.301497	-0.153576	-0.727154
C20orf173	0.416419	0.0756034	0.319033	0.0107294	0.702403	0.935145	0.23632	0.710298	-0.531507	0.0638867	0.80074	0.770015
C20orf202	0.635593	0.415231	0.711377	0.646212	-0.174301	1.66295	1.41048	0.955915	-0.0361108	-0.249759	0.163693	-0.541179
C20orf203	0.829772	-0.168117	1.28968	0.0815945	0.496539	-0.276107	0.991067	0.724317	-0.277619	-0.124205	-0.265889	-0.59838
C20orf96	0.520741	0.271225	-0.151707	0.594622	0.450527	1.70983	-0.103592	0.637189	0.780782	0.114554	0.390562	0.420282
C21orf140	0.259895	0.432335	-0.360146	0.261131	-0.614945	0.409444	0.567596	-0.143258	0.407256	0.8286	0.544085	0.857224
C21orf58	1.1064	0.792981	0.289294	1.01973	0.461536	0.840753	0.93837	0.0309671	0.339721	0.545796	-0.309853	0.62596
C21orf91	0.707892	0.712448	0.657449	0.206067	0.930083	0.771425	-1.28338	0.961322	0.695449	1.87059	0.447459	1.7206
C22orf15	0.530836	0.38861	0.14869	-0.391524	-0.373272	-0.197564	-2.09132	-0.659696	0.327225	-0.304226	0.468619	-0.139573
C22orf23	0.338433	0.444879	0.012602	-0.0364792	0.124713	0.514539	0.485607	-0.023654	0.818412	0.434603	0.0740372	0.892321
C22orf31	0.118827	0.0397777	-0.877015	-0.480423	-0.290176	1.08881	-0.637075	-0.876399	0.18775	-0.0757214	0.838048	-1.0105
C22orf39	0.737461	0.823496	0.214892	0.0161897	0.19484	0.0212855	-1.04694	0.0426878	0.990858	0.701235	0.173776	-0.408553
C22orf42	0.185691	0.294273	-0.408904	-0.338153	-0.834136	-0.207528	-1.52176	-0.35404	0.72152	-0.0489486	0.369119	-0.195769
C22orf46P	0.423038	0.268205	0.303641	0.335363	-0.82595	0.245029	-1.36244	-0.765976	-0.456774	-0.326236	0.0427028	-0.0435394
C2CD2	-0.623328	0.631058	0.0754541	-0.536781	0.212705	0.0746523	-0.336987	0.505801	-0.307524	-0.0526439	0.0587529	-0.314155
C2CD2L	0.447112	0.329177	0.902917	0.413679	-0.222795	0.964232	0.225842	-1.0453	0.561493	0.324557	-0.0126236	0.145449
C2CD3	-0.661024	-0.299707	-0.770726	-0.112797	-0.871196	-0.852272	-0.182802	-0.624081	-0.0711026	0.176315	-0.442634	-0.675966
C2CD4A	0.36391	0.64103	0.586031	0.491941	0.50785	-0.0678483	2.42121	1.32126	0.595662	0.725012	0.487604	1.26146
C2CD4B	0.470446	0.922519	0.714732	0.998193	0.253091	-0.0593059	1.9622	1.20309	1.02929	-0.663709	1.3232	0.765281
C2CD4C	0.336766	0.505882	-0.523113	0.387977	-0.0792229	0.271012	1.01751	1.23253	1.05245	0.347053	-0.384431	0.103984
C2CD4D	-0.325644	-0.746236	-0.848744	-0.216083	-0.319279	-0.258055	-1.08564	0.126449	0.324978	0.320164	0.189642	-0.821996
C2CD5	0.569069	0.236869	0.253601	0.860875	1.15474	-0.153093	-0.289483	1.72768	0.887864	0.867029	0.768821	1.17071
C2CD6	0.989859	0.651029	-0.0889622	0.48733	-0.151582	1.08714	-0.167688	0.28225	-0.261093	-0.274476	1.43641	-0.522657
C2orf15	-0.535387	0.0742296	-0.316255	0.495714	0.249643	-0.128288	-0.550587	0.808435	0.154646	0.744495	1.03319	-0.0724243
C2orf27A	-0.995944	-0.538294	-0.255287	-0.206441	-0.982959	0.692537	-1.15845	-1.08498	-0.870043	-0.802393	0.908919	0.439458
C2orf27B	-4.1469	-3.35744	-1.78268	-3.18571	-3.42599	-3.19331	-2.70344	-2.53661	-3.76691	-4.31354	-5.71387	-3.02352
C2orf42	0.0517357	-0.202034	-0.200424	-0.488519	0.433973	-0.529816	0.902842	-0.23089	-0.34492	0.225492	-1.56714	-2.22677
C2orf47	0.0384207	-0.721668	-0.718118	-0.957042	-0.32484	-1.33471	-0.300657	-1.1153	0.260073	0.516292	0.386874	0.503696
C2orf48	0.17169	0.348722	0.332299	-0.0692904	-0.0696334	0.175681	1.38451	-0.386476	-0.382628	-0.53301	0.200419	-1.19471
C2orf49	-1.3441	-1.18401	-0.270275	-0.356677	-1.00695	0.578454	-1.02453	-0.229988	-0.496693	-0.515496	-1.32586	-0.885666
C2orf50	0.325026	0.729406	0.0562616	0.44326	0.0911421	1.41158	0.180378	-0.41072	-0.00970499	-0.152613	0.690726	1.84584
C2orf66	-0.100924	0.0383338	0.184375	-0.350703	-0.180699	-0.185212	-0.0162431	0.760208	-0.414117	1.06888	0.573092	-0.297279
C2orf68	0.746483	0.287623	0.712587	0.144448	-0.638112	0.322753	1.21494	0.519416	-0.258276	-0.420475	-0.573428	0.664326
C2orf69	-0.578783	-1.21024	-1.32181	-0.424563	-0.687915	-0.145488	-0.338479	0.210857	0.697346	-0.103635	0.373335	0.321744
C2orf72	-0.333362	-0.575898	0.784198	0.0277416	0.299426	-0.179302	-0.169213	-0.239781	1.08689	-0.413183	0.94912	0.554842
C2orf73	0.935091	0.00969148	0.150734	0.454893	-0.647629	-0.521135	-1.60389	0.112688	0.241493	-0.41694	0.597939	-0.399341
C2orf74	0.177704	0.160423	-0.100339	-0.682798	0.165039	0.112235	1.76138	-0.229509	0.0176865	0.278984	0.827799	0.452437
C2orf76	0.250451	0.484873	0.613449	-0.963199	-0.604178	-1.03736	-2.19324	-0.365029	0.56695	-0.368804	-0.124188	-0.00136345
C2orf78	-0.917817	-1.06216	-0.0578978	-0.675514	-0.438438	0.151026	-0.90747	-0.802659	-0.144505	-1.37923	-0.555578	-0.355271
C2orf80	0.313321	-4.72744e-05	0.0171699	1.57461	1.36881	0.388445	0.0969402	0.100174	0.073201	0.307036	0.308118	-0.275014
C2orf81	0.639912	-0.152276	0.0230797	1.14133	0.155724	0.0242372	1.47812	1.31955	0.177864	-0.227883	0.0222082	-0.196239
C2orf83	0.31064	-0.196814	0.566093	0.633766	-0.341656	0.0437998	0.57507	0.0483538	-0.0445971	0.164576	-0.229773	-0.786445
C2orf88	-0.0292252	0.465057	-0.571788	-0.0157046	-0.690536	0.275302	-0.856616	1.62828	0.00879136	-0.763964	0.404838	0.176751
C3	0.353705	0.514089	0.088616	0.182198	0.28023	0.510147	0.152852	0.0857824	0.167629	0.772433	0.0769889	0.834721
C3AR1	0.836698	0.916806	-0.194841	0.792019	0.55366	-0.380211	-1.0355	1.00785	0.485607	0.0923639	-0.449308	-0.542543
C3orf18	-0.0690834	0.21293	-0.421719	-0.249437	-0.695899	0.376577	2.56994	-0.128719	1.37031	-0.152479	0.480777	0.236525
C3orf20	0.253283	0.739145	0.476772	0.00521417	-0.47707	0.0938922	0.675947	0.601639	-0.129132	0.602948	0.404668	0.174746
C3orf22	0.0590219	0.713798	0.432359	0.254098	1.23297	0.669353	-0.339504	0.851043	0.829619	0.89716	0.0889849	0.430702
C3orf33	1.50488	0.779814	1.39	1.08193	1.59834	-0.0230894	-0.326624	-0.216652	0.742017	-0.112933	0.619741	1.78215
C3orf36	-0.895072	-0.806616	-0.749963	0.0724062	0.648184	-1.05305	1.18384	0.265883	-1.32409	0.348932	0.239383	0.0275215
C3orf38	-1.43439	-0.933557	-0.859084	-2.55715	-2.78521	-0.891144	-1.19485	-0.0858028	-0.867187	-0.517352	0.125746	-0.495122
C3orf52	0.812879	0.22792	0.699552	0.29031	1.00065	0.992809	1.8325	0.946201	0.69803	0.415948	-0.173291	-0.0955522
C3orf62	-0.0763926	-0.519336	0.308063	0.0252787	0.0065383	-0.514128	0.59642	-0.539154	1.03541	1.2491	-0.144311	-0.697501
C3orf70	0.424137	1.17853	1.42958	0.691827	1.70761	1.0556	0.409342	-0.378547	0.37919	0.326568	0.0731881	-0.145306
C3orf80	-0.490024	-0.191464	-0.092507	-0.227035	-0.57351	1.23689	1.17901	2.32246	0.553924	0.858999	0.343516	-0.539246
C3orf84	0.874777	0.581689	0.67703	0.48133	-0.194543	-0.214943	0.26368	0.766813	0.107497	0.180478	0.513812	-0.582616
C4A	-0.487699	-0.123059	-0.686107	-1.34122	-0.332462	-0.290793	-0.812557	-0.633146	0.109709	-0.527508	-0.174747	-0.0977413
C4B	0.412003	0.156304	0.54258	-0.469995	-1.56152	-0.44145	-0.00695708	-1.35913	0.292241	0.0462917	0.95952	1.22635
C4BPA	1.6829	0.561432	0.498717	1.84862	0.266459	-0.0843408	0.721109	0.89349	0.862399	0.359512	0.581979	-0.315446
C4BPB	0.490814	0.423513	0.0115158	0.068422	-0.0359471	0.119895	-0.473787	-0.538539	0.0316825	1.00625	0.140164	0.188293
C4orf17	-0.30065	0.786488	0.916667	-0.358642	0.525876	-0.403886	-0.356395	1.51836	0.394797	0.904675	0.747265	0.188492
C4orf19	0.942784	0.705046	1.00258	0.440064	0.746136	1.67674	0.649025	0.645656	-0.0925973	0.15081	1.16896	1.78485
C4orf3	0.0647491	-0.0821722	-0.549403	0.665076	-0.321816	0.108681	0.694202	-1.82956	0.794218	-0.111898	1.10548	0.890771
C4orf33	0.936573	1.02923	-0.907375	0.561557	1.15369	1.10579	0.0718001	0.734257	0.401682	0.0766971	0.618663	0.814522
C4orf36	-0.150555	0.486353	-0.482412	-0.0713131	-0.386095	0.835483	-0.0158354	0.397498	0.575458	0.0783971	1.75785	0.33222
C4orf46	0.289251	0.0418579	-0.00552893	0.166928	0.0621478	-0.0141895	1.15153	-0.391426	0.158409	0.22172	0.2429	0.297124
C4orf51	1.2569	0.737093	0.808261	1.03844	0.696898	0.929425	1.27081	1.43871	1.36577	1.17607	0.749761	0.197988
C5	1.02663	0.653652	0.934405	-0.132054	-0.14691	1.476	0.513209	0.325555	0.445336	0.135369	1.0813	0.590251
C5AR1	0.830053	0.892316	0.195004	0.995888	0.766662	0.222887	0.390347	-0.0888787	0.77556	0.145999	0.021835	-0.083114
C5AR2	0.525111	0.554524	0.173573	0.256147	-0.259589	0.551593	0.559472	0.485354	-0.573459	0.443864	0.088151	0.161541
C5orf15	-0.564343	-0.350453	-0.606549	-0.898955	-0.0365056	0.018532	1.1787	0.774762	0.400763	0.911095	0.246852	-0.87155
C5orf22	0.999034	0.488404	0.412559	-0.702946	0.375057	0.602762	0.873293	0.283707	1.28437	0.691907	0.667827	0.276085
C5orf24	0.643157	0.277302	0.631901	1.3027	0.349652	0.50884	-0.683308	0.026159	1.12513	1.13232	0.567438	0.34436
C5orf34	0.339946	-0.163754	-0.591011	-0.167226	-0.235397	-1.52539	-2.0507	-1.41795	0.478742	-0.231394	1.16735	1.25364
C5orf46	0.20125	0.683309	-0.341308	0.548823	-1.23768	-0.274575	0.859281	0.843742	0.958567	1.08631	0.748475	-0.0621042
C5orf47	0.598535	0.322157	0.0855115	0.598841	-1.05069	-0.0233182	-0.957313	-0.281997	-0.40823	-0.151383	-0.147936	-0.0767315
C5orf52	1.09336	1.14802	1.32791	1.18372	0.464964	0.595531	1.91841	0.31003	0.115966	0.790932	0.83315	0.831679
C5orf63	-0.0200095	1.03754	-0.449907	0.341365	-0.666522	0.236716	-0.233704	-1.20351	0.730399	0.228467	0.637572	1.83574
C5orf67	1.06837	0.567899	0.582978	0.615295	-0.12677	-0.238601	2.24697	1.08952	1.02462	1.55007	0.846481	-0.319277
C6	0.136189	0.573352	0.215434	0.690412	-0.237526	-0.493804	-0.808042	1.50897	0.447194	0.566867	0.626076	0.182636
C6orf118	0.618802	1.40902	0.358873	1.07913	0.447543	-0.23635	0.202544	0.556213	0.340093	-0.00663873	1.26988	0.0996058
C6orf120	1.12889	0.547175	0.589303	-0.376537	-0.328711	1.22788	1.16889	0.187221	0.499806	0.392483	1.14063	0.2473
C6orf132	0.944649	0.390851	-0.0191498	-0.511026	-0.522215	-0.180093	-0.897384	1.69191	0.370134	0.0348838	0.461679	-0.792913
C6orf136	-0.5107	-0.685933	-2.30593	-1.09067	-0.810929	0.0328409	0.311544	-1.35033	-0.936971	-0.550502	-0.254771	-2.32286
C6orf141	0.760718	0.415722	0.604126	0.0353163	0.121407	0.494255	-0.420002	0.750657	0.307324	0.902125	0.493768	0.461847
C6orf15	-0.20609	0.262125	-0.537578	-0.380231	-0.131942	-1.179	-0.62498	-1.34895	-1.06214	-0.21256	0.877643	0.440496
C6orf163	0.546783	0.157359	0.211853	0.273091	0.528195	0.794282	1.4446	0.51736	0.237568	-0.121029	0.758099	0.399088
C6orf226	-0.0436775	0.589947	-0.259027	0.603531	0.340981	-0.129983	-0.0946831	0.676771	0.229834	-1.00621	1.01428	0.493689
C6orf47	0.231248	0.741145	0.595986	1.26293	0.198369	0.192716	0.846447	0.364667	0.484277	-0.113007	0.0221385	-0.239943
C6orf52	0.557185	0.815289	0.618866	2.10043	1.69494	-0.179541	1.37469	0.715478	0.327358	0.673811	0.467182	-0.77847
C6orf58	0.658977	0.718629	-0.126321	0.0268849	-0.502214	0.396227	0.155193	0.068946	-0.0660175	0.302486	0.916332	-0.601991
C6orf62	1.02283	0.767218	0.363561	0.578352	0.196211	-0.0130864	0.127652	1.10411	-0.14339	0.667123	-0.094177	0.342199
C6orf89	0.370823	-0.0379973	-0.582734	-0.245402	0.95942	-1.33189	0.0546776	-0.0315703	0.548898	0.114369	1.05722	0.515409
C7	0.0890382	-0.422961	0.311027	-0.672527	-0.110133	-0.148859	-0.558046	-0.611324	0.357206	0.673654	-0.170001	0.289348
C7orf25	1.13604	0.863697	0.121538	0.74829	0.312451	0.6477	-0.0616764	-0.211663	0.432936	0.841171	0.165389	0.81627
C7orf33	-0.0579995	0.293237	0.67813	1.58983	0.212201	0.184995	2.15003	0.285423	0.114458	-0.175048	-0.508816	0.965713
C7orf50	1.22301	0.718473	0.870714	0.709984	1.23489	0.0413016	0.48369	0.799239	-0.284582	0.205029	-0.136537	1.66047
C7orf57	1.25015	1.10587	-0.163406	1.03244	0.729945	0.884037	1.37892	0.662606	1.47606	0.204649	0.702185	0.598709
C8A	0.319792	0.545746	0.611689	0.220037	-0.749996	0.638222	-0.334645	-0.121386	-0.132535	-0.043276	-0.148121	0.504606
C8B	0.129737	0.37478	0.659869	0.165097	0.321867	0.651929	0.0739744	0.700633	0.332093	-0.0378516	0.0235648	0.656593
C8G	0.546425	-0.190945	-0.575418	-0.0151517	-0.649807	-0.47975	0.278281	1.35664	0.312934	0.554967	0.950349	0.682805
C8orf33	0.0589094	-0.131811	0.627336	0.243699	0.592454	0.319137	0.434497	-0.0750372	0.291934	0.165978	-0.24664	-0.805024
C8orf34	-0.141099	0.81921	0.372405	0.202891	-0.307482	-0.440143	1.46362	0.308443	0.350889	0.639565	-0.131852	0.392577
C8orf44	-0.349258	0.687776	-0.296813	0.658578	-1.48353	-0.37874	-1.20517	-0.59371	0.159221	0.00913772	-0.688661	0.287187
C8orf44-SGK3	0.259279	-0.195568	0.0537756	-0.772431	1.49303	-0.815013	0.0753484	-0.602857	0.718508	0.274998	0.338977	0.585646
C8orf48	1.33743	0.904106	1.24428	0.73477	1.16936	1.19889	-0.443561	1.48016	1.01896	1.02994	1.20313	0.539035
C8orf58	0.0513344	-0.0597653	0.650024	0.213427	0.68845	0.334886	1.20286	-0.43948	0.67855	0.0990136	0.460072	0.441122
C8orf74	0.098673	0.429037	0.837494	0.878875	0.515351	0.874968	0.292399	0.538081	0.0929119	-0.526031	1.13447	-0.178485
C8orf76	-0.0240858	-0.0136322	-0.275005	-0.0631883	-0.666542	0.447498	-1.41553	-1.58118	0.477803	-0.466442	0.0787966	0.467491
C8orf82	1.04008	0.808822	0.834194	1.0714	0.111003	1.17681	-0.0235209	-0.141227	0.681993	-0.205223	0.423256	1.07656
C8orf88	1.50577	0.800045	0.662097	0.986403	0.416209	0.690229	-1.11523	0.0672138	0.996843	0.985492	0.135314	0.501422
C8orf89	0.506429	0.688296	0.591696	0.970813	0.850621	-0.316412	-0.323897	0.0699173	0.621694	0.373023	0.379122	0.742267
C9	0.522402	-0.314952	0.458347	-0.092279	0.146752	0.458815	0.739198	-0.866961	0.516959	0.621581	-0.412719	0.929166
[truncated: 17,034 more rows]

## Sheet: TKI resistance genes
Huh7_LVT	Huh7_SRF	Huh7_RRF	HepG2_SRF	HepG2_RRF
AAGAB	CAB39	ABCD1	ARID2	ADGRL2
ACVR1B	COP1	ADGRG4	CDKN1B	AFF1
ACVR2A	DET1	ATP2B3	CSK	ALAS1
AP1G1	DUSP9	AXIN1	CUL5	ARIH2
AP1M1	NCOA6	BCAP31	DUSP9	ATP1B4
CAB39	PDCD10	BGN	KEAP1	ATP6V0D2
CACNA1A	TRIP12	CCDC152	MICU1	BATF3
CLK3		CD40LG	PBRM1	CALHM4
COP1		CD99L2	PTEN	CDKN1B
CTDSPL2		CHIC2	RBM15	CEACAM1
DDA1		CIC	SLC35A1	CHIC2
DET1		COP1	SMAD7	CSTA
DUSP9		CRAMP1	SUPT20H	DCDC1
EGR4		CSAG1	TP53	DUSP8
EMC4		CT45A9	USP28	DUSP9
ERRFI1		CXorf51B		DYNLRB2
GOLGA8J		DET1		ELOA
HSF2		DUSP9		EOLA2
LINC02915		EOLA1		ERF
MGA		EOLA2		FAM107B
MTMR10		FBXO11		GPM6A
NF1		FMR1		GPR34
PDCD10		FMR1NB		GUCY2F
PTER		G6PD		HMBS
S1PR2		GABRQ		IDH3G
SPRED2		GPR119		IL18
STK35		HS6ST2		KRTAP6-3
STK40		HSFX1		LHFPL1
TMEM243		HSFX2		LOC100132146
TRIB1		IDS		LZTR1
TRIM28		LDOC1		MBNL3
VPS37D		LOC389895		NXT1
WIZ		MAGEA2		OCIAD1
		MAGEA2B		OR4M2
		MAGEA4		OR8D1
		MAGEA6		OXNAD1
		MAGEA8		PCDHA13
		MAGEA9		PITPNA
		MAGEC1		PLCL2
		MAGEC2		PRR36
		MMGT1		PWWP2A
		MPDZ		RABGAP1
		MTM1		RALY
		NAA10		RIPOR2
		OPN1MW		SLITRK2
		PABIR2		SMARCA1
		PNMA6A		SREBF2
		PPP6C		STUB1
		RAB33A		SUCLG1
		RAP2C		SUPT20H
		RTL8B		SYT14
		SLC25A14		TADA1
		SLITRK2		TM2D1
		SPANXA1		TM2D2
		SPANXA2		TM2D3
		SPANXC		TMEM179B
		SPANXD		TRAFD1
		SPANXN1		TTC39A
		SPANXN3		USP22
		SPRY3		WASHC3
		STK26		ZC3H4
		STUB1		ZNF41
		TM2D1		ZNF429
		TM2D3		ZNF687
		TMEM185B
		TMEM187
		TMEM257
		UGT1A1
		ZEB1
		ZIC3
		ZNF280C

## Sheet: TKI sensitizer genes
Huh7_LVT	Huh7_SRF	Huh7_RRF	HepG2_SRF	HepG2_RRF
CEBPA	ARAF	ARAF	ARAF	AIRIM
CFL1	BCL2L1	CRKL	ASNS	ARMC7
COASY	DHX15	EFNA3	FDFT1	ATP6V1H
ELP1	ELOB	H2AC19	GRPEL1	BPIFB6
KDM3B	HMGCR	HIRA	NDUFS5	BUD31
LRRC41	ITGAV	ITGAV	NPIPA2	CENPN
NAA40	NDUFA12	KCTD10	RPL3	CEP131
NCOA4	NDUFAF4	PI4KB	RPL5	DDX42
PHF23	PAXIP1	SAP30BP	SHFM1	EIF2B1
RAC1	PDSS1	SMCHD1	VARS1	EP300
RPL13	PGM3	SRSF10		ERV3-1
TLE1	PHIP	TAF2		GNL2
TOP6BL	PPCDC	TNRC18		HMGA1
ZNF518A	PTK2	WDR26		HSPA5
	PXN			HYOU1
	RAC1			ICMT
	RAN			IL6ST
	RBM10			KIF18A
	SLC2A1			KRAS
	TIMM8A			LRR1
				MBTD1
				MIS18BP1
				MKLN1
				NAT10
				NFE2L2
				NOP58
				NPIPA1
				PAXIP1
				PFDN2
				PFDN6
				POP4
				PPP1CC
				PPP1R15B
				PRIM1
				PSMD11
				PSMG2
				RAB35
				RBM8A
				RPA3
				RPL18A
				RPL36
				RPS16
				RPS27A
				SEC61A2
				SERPINB6
				SF3B1
				SRRM1
				SRSF10
				TAF10
				TMEM105
				TRAPPC3
