# Supplementary material
Source: Research Square preprint supplement (doi:10.21203/rs.3.rs-8651907/v1)
Supplement: Supplementary file 6 [file e51d43df608d1afcc7005742.xlsx]

## Sheet: Legend
Sheet	Legend
sgRNA counts	normalized sgRNA counts in druggable gene screens.
Huh7-LR Z-score and hits	Z-score, mono- and combo-hits of Huh7LR cells.
HLE-LR Z-score and hits	Z-score, mono- and combo-hits of HLELR cells.
JHH7-LR Z-score and hits	Z-score, mono- and combo-hits of JHH7LR cells.
Huh7-RR Z-score and hits	Z-score, mono- and combo-hits of Huh7RR cells.
HepG2-RR Z-score and hits	Z-score, mono- and combo-hits of HepG2RR cells.

## Sheet: Huh7-LR Z-score and hits
Gene	Huh7WT_DMSO_R1	Huh7WT_DMSO_R2	Huh7LR_DMSO_R1	Huh7LR_DMSO_R2	Huh7LR_LVT_R1	Huh7LR_LVT_R2		Huh7LR mono hits					Huh7LR combo hits
AARS1	-3.01795	-2.75129	-1.8032	-0.638457	-1.04951	-0.390859		Gene	Huh7WT_DMSO_mean	Huh7LR_DMSO_mean	diff (Huh7LR - Huh7WT)		Gene	Huh7LR_DMSO_mean	Huh7LR_LVT_mean	diff (LVT - DMSO)
AAVS1	0.191141	0.175071	-0.0928459	-0.0258438	-0.0237107	-0.0443372		ADRA1B	0.846365	-1.25754	-2.10391		AKR1B1	0.422871	-1.15152	-1.57439
ABAT	1.10565	1.22126	1.46495	0.688562	0.740166	0.566207		APH1A	0.50294	-1.66146	-2.1644		ATP1B1	0.157952	-0.906503	-1.06446
ABCA1	1.40865	0.504433	2.35135	1.96137	3.1383	2.71338		ATP1A1	-2.035	-4.14564	-2.11064		CDC42BPA	0.291272	-1.1659	-1.45717
ABCB1	0.354768	0.348721	0.289262	0.0858626	0.736521	0.361674		ATP4A	0.812582	-1.21024	-2.02283		CDK1	-4.75875	-5.80618	-1.04743
ABCB11	0.862684	0.420375	-0.510583	-0.194324	-0.188927	-0.288175		CA3	0.470765	-1.61558	-2.08635		CHRNA10	-0.918194	-2.14144	-1.22325
ABCB4	1.33696	0.662853	-0.0849067	0.295289	-0.0161266	-0.647086		CCND1	-2.4283	-5.33825	-2.90996		DIO1	-0.214824	-1.4406	-1.22577
ABCC1	0.424554	0.109538	0.781713	1.1477	1.58698	1.21283		CD40	0.990038	-1.21238	-2.20242		DOT1L	-0.52338	-1.72409	-1.20071
ABCC2	0.621891	0.410446	-0.681232	-0.0725782	-0.547576	-0.309595		CDK1	-1.23018	-4.75875	-3.52857		EGFR	0.283792	-2.15539	-2.43918
ABCC4	0.511022	0.847929	1.58191	0.737318	1.0186	1.41778		CDK18	-0.621163	-2.65562	-2.03446		EIF4E	-2.27263	-3.68775	-1.41512
ABCC5	0.317533	0.61475	0.600432	1.22704	1.54601	1.91467		CDKL1	0.886861	-1.66516	-2.55202		HIPK2	-0.652191	-1.88029	-1.2281
ABCC8	-0.0299134	-0.359809	1.04646	1.70958	2.02421	3.00606		CDKN3	0.560632	-1.80733	-2.36796		HSPA5	-1.44278	-3.8935	-2.45072
ABCG2	0.711137	0.0949431	-0.390976	0.145143	-0.410985	0.232482		CHRNG	0.724052	-1.72895	-2.453		HTR1F	0.325765	-1.3084	-1.63416
ABHD6	1.24405	0.294455	1.49351	0.374502	-0.529224	-0.897525		CTSD	0.837535	-1.8661	-2.70364		HTR3D	0.373044	-0.740983	-1.11403
ABL1	0.962858	0.976072	0.611018	0.551222	1.5593	-0.00805929		DCLK3	0.925581	-1.78313	-2.70872		INSR	-0.00867977	-1.3716	-1.36292
ABL2	-0.148449	0.0880278	-0.468737	-0.463378	-1.1831	-1.12162		DDC	0.851699	-1.27835	-2.13004		ITGAL	0.0129389	-1.22162	-1.23456
ACACA	-0.910989	-1.46662	0.464135	-0.292516	-0.540825	-0.64756		DPP8	0.419537	-1.60957	-2.0291		MTOR	-2.65356	-3.94157	-1.28801
ACACB	0.204537	0.156349	1.03441	0.891571	1.04824	1.01545		ECE1	0.565237	-1.9402	-2.50544		NDC80	-0.0507413	-1.13371	-1.08297
ACAT1	0.343053	0.105248	3.0839	2.79534	2.23467	2.0402		EPHA6	0.693703	-1.37739	-2.0711		NDUFA11	-0.926756	-2.11818	-1.19143
ACE	-0.308494	0.451611	0.817998	0.64246	1.28637	0.463813		ESRRA	0.017344	-2.03687	-2.05421		NDUFS3	-0.705208	-2.11042	-1.40521
ACE2	-0.76033	-0.37114	-0.737342	0.738978	-0.806072	-0.0569089		F8	1.16087	-3.82819	-4.98906		NRAS	-1.92577	-3.03952	-1.11375
ACHE	0.697874	-0.343245	-0.478337	-0.441417	0.228942	0.424232		FABP5	0.615926	-3.53367	-4.14959		NUP85	-0.885245	-2.53017	-1.64492
ACR	-0.421839	-0.263136	0.203069	-0.105153	0.0709013	-0.14825		FGB	0.751514	-1.69419	-2.4457		P2RX3	0.384865	-1.01743	-1.4023
ACVR1	-1.60789	-1.4484	-3.11256	-3.38315	-2.73053	-3.41536		FZD5	0.805032	-1.54086	-2.34589		PARP1	0.320132	-0.716683	-1.03681
ACVR1B	0.787798	0.790878	-0.626697	-0.116153	0.544627	1.08961		GABRA2	0.896109	-1.43884	-2.33494		PI4KA	-1.311	-2.33362	-1.02262
ACVR1C	-0.244	-0.19153	0.96195	1.38733	0.110083	0.34069		GJC2	-0.250383	-2.80523	-2.55485		POLA1	-0.145367	-1.17435	-1.02898
ACVR2B	0.00692462	-0.00307354	-0.218884	-1.81451	-0.769537	-0.559504		GRK6	0.573946	-2.64561	-3.21956		POLR3K	-2.56195	-3.58786	-1.02591
ACVRL1	0.267873	0.201214	1.33949	0.845553	0.9219	1.33685		GSTP1	-0.0799241	-2.10804	-2.02811		PRKD1	-1.78418	-2.84401	-1.05983
ADA	0.198013	1.12038	-1.15339	-0.507123	-0.146982	-0.16915		HMGCS1	-0.658531	-3.42787	-2.76934		PROC	-1.01882	-2.15603	-1.1372
ADAM10	0.38497	0.578515	-1.35339	-0.582217	0.0959998	0.248461		HNMT	0.786579	-1.8319	-2.61848		PSMA2	-0.246119	-1.3107	-1.06458
ADAM12	1.03072	0.631431	0.893681	0.853726	0.302054	0.216365		HRH4	0.991009	-1.2104	-2.20141		PSMD7	-1.07866	-3.30695	-2.22829
ADAM17	-0.11884	0.522562	-1.88091	-1.38444	-1.13803	-2.22861		HTR2C	0.975866	-1.76094	-2.73681		RPL11	-0.633824	-2.36731	-1.73349
ADAM33	0.721575	0.362505	-0.844455	-0.693346	-1.49849	-1.59356		ICAM3	0.20097	-2.97938	-3.18035		RPL18A	-1.08522	-2.08951	-1.0043
ADAM8	0.415837	0.88337	0.879813	0.252453	0.2882	1.14422		IDE	-0.17595	-3.05676	-2.88081		RUVBL1	-1.93314	-3.25737	-1.32422
ADAM9	0.868194	0.608956	-0.957186	-0.451707	1.16083	-0.896236		IDH1	0.713911	-1.52722	-2.24113		SMC3	0.154906	-1.41677	-1.57167
ADAMTS1	0.199076	0.174024	-0.904041	-0.596924	0.490988	-0.974562		IL1A	0.154425	-2.74224	-2.89666		TAF1	-2.33742	-3.38109	-1.04368
ADAMTS4	-0.0716949	-0.121794	1.06615	-0.752781	-0.0434204	0.430269		KAT5	-1.85474	-4.17792	-2.32318		TLR7	0.289587	-0.781844	-1.07143
ADAMTS5	0.226755	0.669137	0.0683391	-0.0139128	-0.0192022	0.492902		KDM4E	0.873735	-2.14553	-3.01926		VEGFC	0.400198	-1.02247	-1.42267
ADCY5	0.000346732	-0.32834	0.343374	1.16988	1.2742	1.21481		MMP17	0.659041	-1.38696	-2.046		VKORC1	0.312299	-0.689922	-1.00222
ADCY6	-0.10107	0.10447	-0.67179	-0.322751	-1.03393	-0.799728		MPO	0.0558641	-2.33723	-2.3931
ADCYAP1R1	0.0429454	-0.0388436	-0.00705404	0.556424	-0.643331	-0.163625		NPY2R	1.24726	-1.12669	-2.37395
ADGRG3	0.248852	-0.181414	-0.337456	0.0549879	-0.896217	-0.819595		NRAS	0.744371	-1.92577	-2.67015
ADH1A	0.210819	0.618067	1.42309	0.991417	-0.195512	0.176806		PCSK1	0.823024	-1.42447	-2.2475
ADH1B	0.208876	0.0741973	0.608631	1.74895	1.36443	1.58557		PDE3B	1.03387	-1.01163	-2.04549
ADH1C	0.664996	0.522025	-1.22682	0.0538374	0.0869145	-0.19899		PDE4D	0.981343	-1.14779	-2.12913
ADK	0.339114	0.90456	-0.241036	-1.18479	-0.0337664	-1.23809		PDE5A	0.24197	-2.04563	-2.2876
ADORA1	0.588616	0.167335	1.75287	0.960945	1.94161	1.43753		PIK3R1	1.49318	-1.79423	-3.28741
ADORA2A	0.487578	0.21061	-0.335221	-0.481728	-0.767303	-0.0329313		PKMYT1	-1.89897	-4.30693	-2.40797
ADORA2B	-0.203556	0.720558	1.27788	-0.251521	0.637195	0.514457		PRKCI	0.555935	-1.94997	-2.5059
ADORA3	1.08031	0.530996	0.735098	0.961751	1.15591	0.927554		PRMT1	-1.69944	-4.15516	-2.45572
ADRA1A	0.555528	0.902854	0.433313	0.570806	0.405029	0.595944		PRMT6	0.433869	-1.83942	-2.27329
ADRA1B	0.791207	0.901522	-1.03765	-1.47744	-1.59397	-1.11967		PSMA3	-0.793827	-3.15297	-2.35914
ADRA1D	-0.0209795	-0.1563	0.991796	1.20051	2.06163	1.21969		PSMB9	0.630547	-1.79851	-2.42905
ADRA2A	0.637232	0.547023	0.699904	0.227275	-0.0018675	0.271874		RARG	0.0661212	-2.24913	-2.31525
ADRA2B	-0.250655	0.0294935	0.51376	-0.256689	0.522784	0.550263		SCTR	0.179076	-1.93281	-2.11189
ADRA2C	0.934977	0.65547	1.87646	1.85287	1.8191	1.82745		SERPINC1	1.08414	-1.29895	-2.38309
ADRB1	1.15095	0.658998	0.954313	0.491254	1.00465	1.29942		SLC16A7	0.775599	-1.76298	-2.53858
ADRB2	0.411697	1.14648	-0.558746	-1.14085	0.384763	0.0850224		SLC17A9	0.94059	-1.85542	-2.79601
ADRB3	0.201614	0.187419	-0.117707	-0.0527982	-0.0506443	-0.073386		SLC5A3	0.385355	-1.70384	-2.08919
ADRM1	-0.827067	0.181486	-1.51393	-1.34758	-0.127526	0.392181		SLK	1.16912	-2.18159	-3.35071
AGER	1.21645	0.398929	1.53016	0.875216	0.379761	1.42564		SRPK1	0.725549	-1.63634	-2.36189
AGRP	0.727179	0.604891	1.576	1.21557	1.18023	1.22538		STK10	-0.159855	-2.29378	-2.13392
AGTR1	0.613835	0.14167	2.29202	2.82641	0.854177	1.25076		STK33	0.752003	-1.46785	-2.21986
AGTR2	0.686012	0.134559	-0.109577	-0.673575	-1.73087	-0.924908		TACR1	0.60929	-1.95509	-2.56438
AHCY	-0.100486	-0.277784	-1.96863	-1.32836	-1.38005	-2.17446		TLR8	0.945917	-1.76555	-2.71147
AKR1A1	0.841831	0.182425	-0.0121553	0.705613	1.04461	0.216619		TMEM199	-1.77914	-4.05162	-2.27247
AKR1B1	0.262909	0.564871	0.556232	0.289511	-1.33512	-0.967921		TNK2	0.406582	-1.69452	-2.1011
AKR1C3	0.899041	0.517259	2.36717	1.74701	1.58605	2.35358		TUBB4B	-0.151558	-3.17988	-3.02833
AKT1	0.436393	-0.301941	1.93884	1.77378	1.83379	2.03739		TXN	-2.03107	-5.01532	-2.98425
AKT1S1	0.945719	0.360021	-1.16536	-0.908946	-0.714859	-1.08961
AKT2	-0.261326	-0.0304051	-0.270505	-0.0162368	-0.141881	-0.628439
AKT3	0.520596	0.396509	0.122906	1.63477	1.44325	1.73309
ALAD	0.852199	0.59356	-1.18077	-1.04441	-0.0684351	-0.251191
ALDH2	-0.00816693	-0.134316	0.917686	1.38299	1.49859	1.08871
ALDH5A1	0.796157	-0.0586922	0.345686	-0.11277	-1.22146	-0.418311
ALG2	-3.24328	-3.42366	-3.68532	-6.07072	-3.36066	-5.00892
ALK	0.90245	-0.0713079	-0.658279	0.493407	0.00783352	0.28984
ALMS1	-0.0385836	-0.272948	0.260248	0.854948	1.36199	0.5465
ALOX12	-0.68834	0.791065	0.575047	0.88446	0.20892	1.2481
ALOX15	0.492295	-0.502576	0.571461	-0.00426534	-0.15663	0.682861
ALOX15B	0.705533	-0.380158	-0.47515	-0.460149	-0.636733	0.00714381
ALOX5	0.0439098	0.397044	0.785463	1.21572	1.00836	0.470418
ALOX5AP	0.107335	0.206641	0.84102	0.160488	0.406414	-0.555466
ALPL	0.348674	-0.29853	1.29709	1.21472	0.916655	0.897053
AMH	0.640945	0.709648	-1.20607	-0.631667	0.728476	-0.181807
AMY2A	-0.108659	0.0957678	-1.42422	-2.40115	-0.940834	-1.48598
ANGPT1	-0.245284	0.586131	0.0696409	0.823864	0.758718	1.07489
ANGPT2	1.09976	1.19126	-0.311694	0.0505649	-0.812943	0.133213
ANO1	-0.632906	0.592532	-0.90205	-0.128742	-0.239878	-1.28015
ANPEP	0.229674	0.896593	-0.877391	-0.660046	-0.325896	-1.01589
ANXA3	0.616264	0.532515	1.42904	0.295676	0.909556	0.683825
ANXA5	0.707448	0.085493	1.09108	0.220847	-0.315742	0.704584
AOAH	1.51569	1.08527	0.927174	0.167882	0.366727	0.0974026
AOC3	0.0640054	0.454905	0.145031	0.163872	-0.0436845	-0.101583
AOX1	0.106681	-0.18013	4.21553	2.91077	2.03509	2.64731
APCS	0.724681	1.55534	0.465102	0.113707	-0.795526	-0.159301
APEH	0.184747	0.139404	-0.119847	-0.149834	-0.880513	-0.613521
APH1A	0.203156	0.802723	-2.19524	-1.12768	-0.980487	-2.57508
APH1B	0.18116	0.131603	0.342318	-0.00551092	-0.00720186	-1.45087
APLNR	0.144656	0.935958	1.58521	1.46413	1.91882	1.15776
APOB	0.226816	1.02719	-0.228798	0.530385	0.585869	0.219206
APOH	0.0101564	-0.30652	-0.214335	-0.203274	-0.717967	-0.887129
APP	0.636859	1.16192	-0.43501	1.17322	-0.362053	0.335552
AQP1	1.13386	0.685047	1.13264	0.770996	0.467361	0.935823
AQP10	0.254078	-0.174873	0.136285	0.692522	0.460302	0.192123
AQP2	0.436767	0.510437	-0.0284881	-0.315188	-0.252994	-0.311127
AQP3	0.62049	0.25344	1.09837	1.04428	1.82397	1.57746
AQP5	-0.756431	-0.661347	0.485742	0.50689	0.467661	0.640018
AQP6	-0.480542	-0.27428	-0.997867	0.400038	0.418092	-0.130685
AQP7	-0.794493	-0.401698	-2.08887	-1.82958	-1.24233	-1.12339
AQP8	0.285039	0.30594	1.03395	0.720806	0.710781	1.71505
AQP9	0.0137617	0.591107	1.04057	0.0797608	0.232678	0.952052
AR	-0.0221867	-0.131466	0.873189	-0.308863	0.325251	-0.041613
ARAF	0.420258	0.756863	-0.246685	0.382172	0.0518779	1.07661
ARG1	-0.0578245	0.706027	2.23169	-0.225715	-1.52794	-1.30123
ARG2	0.356678	0.040086	1.76083	1.75611	2.03871	1.48765
ART1	0.742591	1.02915	-0.648472	-1.56598	-1.27383	-1.1307
ATAD2	-0.0755944	-0.191811	0.636735	0.282375	0.119631	0.784849
ATAD2B	0.414471	1.18785	0.137499	-0.652082	-1.01848	-0.597926
ATM	0.420417	-0.00781375	-0.0898389	0.0368557	0.46223	0.942045
ATP1A1	-1.92831	-2.1417	-5.25836	-3.03292	-3.03065	0.57969
ATP1A2	0.963068	0.982122	0.918005	0.702932	0.794692	1.008
ATP1A3	0.165303	0.636687	-1.36217	-1.24738	-2.26201	-1.11137
ATP1A4	-0.0971238	0.8808	1.57366	0.455834	1.43506	1.25934
ATP1B1	0.703759	0.360757	-0.428688	0.744592	-0.405896	-1.40711
ATP1B2	0.830343	0.681403	-0.0116657	0.605857	-0.306429	-0.364495
ATP1B3	0.970564	0.744761	0.646466	1.13539	0.999179	-0.848087
ATP2A2	-2.01071	-2.58192	-1.47427	-1.03113	-1.76991	0.125962
ATP4A	0.888533	0.736631	-1.39895	-1.02154	-2.18624	-0.319812
ATP4B	0.910272	0.367219	-1.30313	-0.729549	-0.551379	-0.451027
ATP6AP1	-3.20218	-2.27423	0.728238	-2.39257	-1.39524	-0.798005
ATP6V0C	-2.12301	-2.82302	-1.28447	-2.75105	-2.7989	-2.59183
ATP6V1A	-1.2566	-2.31839	-3.4138	-3.54923	-4.02629	-3.68307
ATR	-1.75246	-1.6763	1.1784	0.709495	0.346497	0.367838
AURKA	-2.26839	-3.04379	-4.01378	-1.46522	-2.30959	-0.292928
AURKB	-2.44212	-1.07621	0.564119	1.31054	1.62902	1.48155
AURKC	0.733484	0.496303	0.921075	-0.105925	0.382376	1.15385
AVPR1A	0.671581	0.702849	-0.465608	0.347345	0.749309	0.0595251
AVPR1B	0.574022	-0.118874	0.698457	0.168813	0.815909	0.291698
AVPR2	1.01129	0.232061	2.48373	2.01141	1.47833	2.33568
AXL	3.47638e-06	1.11594	0.0345723	-0.64156	0.331364	-0.465021
BACE1	-0.27592	-0.383685	-0.290882	0.720544	-1.08614	2.05499
BACE2	-0.102331	1.09837	-0.360694	0.0139397	-0.232317	0.169317
BANF1	-1.37975	-2.04633	-2.44482	-2.25776	-1.17109	-2.02526
BAX	0.213743	0.59036	0.0914622	0.782989	0.194385	0.431329
BAZ2A	-0.10156	-0.0204831	0.322043	-0.765198	0.0535522	-0.864699
BAZ2B	0.444309	-0.743395	0.873501	0.355278	0.695283	1.35464
BCAT2	0.63847	0.100938	2.32102	1.30445	0.273843	0.458199
BCHE	0.63359	0.25836	1.93859	2.37786	2.65408	1.75791
BCL2	0.387819	0.2876	1.17731	0.477981	0.00745831	0.63921
BCL2A1	-0.0140513	0.00766612	1.98177	3.35084	2.06912	2.45318
BCL2L1	-1.30956	-1.79087	0.583591	-0.112328	-0.10973	0.564414
BCL2L10	0.964539	0.399272	-0.441718	-0.0613551	0.677396	-0.0406897
BCL2L2	0.120325	0.0513373	1.19436	2.61657	1.50951	1.87049
BCR	1.52858	0.829613	0.268375	0.197533	1.01613	0.532564
BDKRB1	0.253062	1.12328	1.52866	0.706453	-0.121132	-0.0483813
BDKRB2	0.62105	0.985603	-1.08597	-0.66943	-0.545866	-1.01393
BIRC2	0.998048	0.228989	0.181955	0.0191766	-0.975631	-0.442528
BIRC3	0.422742	0.411288	3.24223	1.5052	2.73538	2.51489
BIRC5	-2.43651	-0.929803	-1.00334	-0.388139	-0.343382	-0.232679
BIRC7	0.631325	0.554545	-0.428277	-0.704757	-0.394139	-0.501219
BLK	0.100491	-0.10488	0.336517	0.650496	-0.0297365	-0.272548
BLVRB	0.389503	0.643345	-0.484392	-1.30261	-0.72822	-0.516429
BMP1	-0.367945	0.611105	-0.580572	-0.471535	-0.281078	0.203518
BMP10	-0.527524	-0.0430441	1.55158	0.480541	0.0693111	0.454172
BMP2K	0.865929	1.02913	0.407992	-0.422798	-0.430954	-0.218595
BMPR1A	0.07732	-0.426158	1.66711	0.646073	0.322832	0.216268
BMPR2	-1.6247	-1.75982	-2.02766	-1.46904	-0.805389	-1.01621
BMX	0.819181	0.953457	0.979307	0.943172	0.757967	1.09257
BPTF	-1.1511	-0.899362	1.81244	2.65363	0.966949	1.96532
BRAF	0.429691	0.152381	1.96464	1.60557	0.474234	0.678484
BRD1	-1.49424	-1.3814	0.0589477	-0.0158131	0.505651	-0.641043
BRD2	0.311766	-0.218584	1.40509	2.50784	1.91319	1.18156
BRD3	0.368335	0.538215	0.170621	0.982104	1.09092	0.219769
BRD4	-0.640214	-0.423004	-1.77577	-1.90031	-2.11659	-1.36639
BRD7	-1.56175	-0.580326	-1.74473	-0.464375	-0.824565	-0.399655
BRD9	-0.348868	0.0720246	0.585194	0.702293	0.543326	0.436866
BRDT	-1.02828	-1.07294	1.58985	2.6886	2.31578	1.94026
BRS3	0.93451	-0.060935	-0.304155	0.0354563	0.231762	0.21791
BRSK1	1.14805	0.892505	-0.497099	-0.46662	-0.123421	0.0310256
BRSK2	-0.155127	0.309975	1.24445	1.43204	0.517699	0.827764
BTK	0.317295	0.363458	-1.04671	-0.685281	-0.837443	-1.14318
BUB1	-0.0448649	-0.612823	-0.583548	1.03537	0.0392362	-0.542332
C1QB	0.56181	0.78922	0.548988	1.02467	0.209465	0.0480358
C1S	0.2526	0.599237	-0.340044	1.71908	-0.221898	1.07465
GATD3	0.239841	0.0578507	-0.90331	0.124181	-0.361437	-0.719145
C3AR1	0.317524	0.403576	-0.997871	-1.05111	-0.829382	-0.731933
C5	1.69542	0.335736	-0.907672	-0.403417	-1.63993	-0.89943
C5AR1	0.200351	0.184328	-0.118995	-0.0477857	-0.054681	-0.0713542
C5AR2	0.714173	-0.160575	1.47892	1.96249	0.629195	2.49523
C6	0.609772	0.336016	0.685865	0.507567	1.15897	0.349978
C7	0.791814	0.739318	-1.17298	-0.907967	-1.13894	-0.80869
C8G	0.263229	0.403171	0.567621	0.752642	-1.43111	-0.669628
AOPEP	-0.140626	0.213577	1.29784	0.513217	-0.650368	0.530344
CA1	1.24697	0.556671	1.60765	1.38695	1.73432	1.55877
CA12	0.540981	0.52595	-0.20559	-0.368879	-1.40342	-1.12673
CA13	0.691126	-0.0892034	-0.332814	-0.105258	-0.205938	0.124705
CA14	0.362906	0.0592968	0.0758838	-1.4507	-0.397673	-1.11957
CA2	0.705253	0.684907	0.640696	0.0500319	0.733528	1.12217
CA3	0.598284	0.343247	-1.37378	-1.85738	-0.0466686	-0.852936
CA4	0.116615	-0.165271	0.311516	0.268981	-1.03997	-0.13988
CA5A	-0.796594	-0.232344	-1.10748	-1.1804	-0.984811	-0.905545
CA5B	-0.57663	-0.619878	3.69733	3.67263	3.74181	3.65466
CA6	0.370591	-0.0489875	-0.485568	0.573588	0.756523	0.17035
CA7	0.632259	0.830711	0.219619	0.000611077	-0.875695	0.770644
CA9	-0.198583	-0.443072	0.0427279	0.320641	-0.392941	0.38354
CACNA1A	0.177408	0.505695	-0.953774	-0.703583	-0.590963	-0.421017
CACNA1B	-0.0924303	0.478314	0.839135	-0.547958	0.410489	-0.43389
CACNA1C	0.796858	0.0792669	0.936045	0.754487	0.823866	1.0578
CACNA1D	0.542289	0.752424	-0.821429	-0.450192	-1.15142	-1.84318
CACNA1E	0.345323	0.495322	1.07735	0.64796	0.902909	-0.20874
CACNA1F	0.341185	0.484248	-1.32448	-0.845803	-0.993872	-0.977359
CACNA1G	-0.0719517	0.105727	0.987555	0.803219	0.855037	1.28122
CACNA1H	0.357804	-0.0225694	-0.524919	-0.676176	-1.4438	-0.124182
CACNA1I	0.649725	0.178352	-0.341462	-0.363787	-0.199492	-0.681033
CACNA1S	-0.204887	-0.660552	-0.111301	0.369016	-0.0536643	0.201888
CACNA2D1	0.698131	0.611549	2.76888	3.30867	3.49305	2.39839
CACNA2D2	0.296676	0.719927	-0.872001	-0.566838	-0.314254	-0.733511
CACNA2D3	0.665837	0.768731	0.0138183	0.297314	0.350436	0.739172
CACNA2D4	0.847039	0.412058	-0.0114204	-0.594817	-0.224894	-0.905426
CACNB1	0.805264	0.86454	0.681736	0.527546	0.734019	1.29256
CACNB2	0.726619	0.849471	1.58215	1.24101	1.44531	1.76256
CACNB3	-0.0362788	-0.257646	-1.30653	-0.593324	-0.481099	-0.59431
CACNB4	0.492878	0.807396	-0.171272	0.338438	-0.0749985	0.000399971
CACNG1	0.367607	0.581622	-0.834437	0.279149	0.293511	-0.13714
CACNG2	0.645452	0.431216	-1.06401	-0.175421	-0.296278	0.0203926
CACNG3	-0.125962	0.234267	1.03064	0.602636	0.899045	0.621726
CACNG4	0.790577	-0.00848893	-0.295041	-0.0733524	-0.707147	-0.133682
CACNG5	0.200303	-0.834415	1.3957	1.06304	1.09168	1.41171
CACNG6	0.109838	0.692476	0.526245	0.193634	0.611754	0.682456
CACNG7	1.403	0.935141	-1.14266	-0.460177	0.979298	0.108537
CALCA	0.128024	0.319135	1.04107	0.208818	1.27338	1.95548
CALCB	0.418576	0.180106	0.969863	0.575269	0.361764	-0.689061
CALCRL	0.0794542	0.144448	0.755063	0.0740928	-0.390902	-0.42384
CAMK1D	0.452855	1.05345	0.813536	1.17848	0.463444	1.3055
CAMK2B	0.0483488	0.221674	-0.410712	-0.116119	-0.536878	-0.199318
CAMK2D	0.56704	-0.171672	1.20832	1.84891	2.35282	1.05359
CAMK2G	-0.312791	-0.700105	-0.396288	-1.84269	-0.273737	-0.661828
CAMKK1	0.645872	0.595429	-1.47081	0.112626	-1.03132	-1.57221
CAMKK2	-0.949004	-0.117752	-1.66156	-1.43828	-1.74244	-1.75209
CAPN2	-0.0321715	0.0566195	1.55396	1.18396	1.94918	1.63358
CARM1	-1.96478	-1.94697	-2.10117	-2.09682	-2.57012	-1.5286
CASP1	0.365269	0.77887	0.162931	-0.604085	-1.21223	-0.225197
CASP10	-0.121082	-0.218047	-0.909379	-0.768495	-1.01601	-0.737052
CASP14	-0.425154	-0.0541039	-0.744205	-0.328736	-0.960852	-0.7345
CASP2	0.412571	0.483828	0.603438	-0.16254	-0.435444	-0.173428
CASP3	-0.833628	0.384129	-0.8057	-0.52885	-0.641999	-0.114332
CASP4	0.533392	0.550714	1.34027	2.38056	2.3168	1.8396
CASP5	0.612247	0.555036	1.14458	1.70412	1.75539	1.85559
CASP6	0.452318	0.330685	-0.0263552	-0.721803	-0.42679	-0.282379
CASP7	0.908077	0.784828	0.581551	1.62076	0.783295	0.973755
CASP8	-0.211822	-0.709496	-0.97224	-2.12137	-2.56301	-2.17667
CASP9	-0.347397	0.310241	0.0870156	0.522343	0.778683	-0.0362507
CASR	0.272873	-0.200478	1.40429	0.397871	0.342095	1.26034
CBR1	0.817477	0.714157	-0.252879	-0.368964	1.19813	-0.00188668
CBS	0.206102	0.437804	0.763487	1.30324	1.54831	0.997538
CBX4	-0.0350693	0.505718	0.634949	-0.138011	0.929644	0.790025
CCKAR	0.595178	0.0760196	0.916413	1.05585	0.954942	0.857168
CCKBR	0.359067	0.389388	-1.27145	-0.726695	-0.669836	-0.400479
CCL11	0.188169	0.340035	1.71473	1.4804	1.62538	2.21561
CCL2	0.264495	0.335192	-0.86024	-1.03209	-1.16161	-0.522439
CCND1	-2.30995	-2.54664	-5.03097	-5.64554	-3.67859	-3.79306
CCR1	0.170562	0.4696	2.64619	2.99059	2.16739	2.74605
CCR2	-0.173667	0.133454	1.27934	0.957204	0.860217	1.66938
CCR3	0.146354	-0.499726	1.64368	1.71507	2.94281	1.92265
CCR4	0.0510224	0.204638	-1.40885	-0.144879	-0.274902	-0.633029
CCR5	0.191141	0.175071	-0.0928459	-0.0258438	-0.0237107	-0.0443372
CCR8	0.373304	0.696051	0.0181953	-0.105848	-0.0419272	0.236506
CCR9	-0.122483	-0.105604	-0.259352	0.298574	-0.390211	0.201026
CCT2	-3.3598	-3.77059	-5.03634	-5.36606	-5.5117	-4.21354
CD14	0.240929	0.556858	-0.967904	0.0867839	0.811551	0.36099
CD2	-0.0486711	0.607858	-0.974437	0.353702	0.578653	0.930892
CD200	0.545978	1.30244	-0.739383	-0.23865	-0.0204531	-0.637453
CD248	-1.12458	-0.983022	-2.07038	-2.89116	-3.32401	-3.20616
CD274	0.381778	-0.406557	0.136283	0.378183	0.3732	0.638061
CD28	0.449002	1.07877	2.40952	1.17949	1.79346	1.38839
CD38	0.763747	1.03915	-0.0417828	-0.402278	0.556915	-0.878155
CD3D	1.23445	1.19439	-0.756925	-0.897198	-0.742813	-0.597824
CD3E	0.440783	0.629281	0.0139559	0.245011	-0.370753	-0.379298
CD3G	-0.156528	0.443574	0.72779	1.42417	0.66973	0.411078
CD4	-0.253177	0.28697	-0.648696	-0.554052	0.926422	-0.254192
CD40	0.575867	1.40421	-1.171	-1.25377	-1.98632	-1.11622
CD40LG	0.845077	0.192438	0.383906	1.77119	0.124124	1.02965
CD52	0.292072	0.354094	-0.183227	-0.778418	-0.559236	0.176949
CD74	-0.0259859	-0.351819	1.59805	1.8438	2.54014	1.8457
CD80	0.449143	0.705606	0.45824	0.394386	-0.0122829	0.784937
CD86	0.0269152	0.314058	-0.702632	-0.932587	-1.80919	-0.921222
CDC42BPA	0.161765	0.172092	0.653981	-0.0714375	-0.665217	-1.66658
CDC42BPB	0.617128	-0.0671026	0.782022	1.18732	0.76015	0.747527
CDC7	-1.68114	-2.431	-1.87076	-2.17764	-2.17152	-1.2821
CDK1	-1.47024	-0.990124	-4.95765	-4.55985	-4.95497	-6.65739
CDK10	-0.119681	-0.466388	0.719755	0.543982	1.47467	0.530022
CDK11B	-0.156084	-0.153753	-1.94095	-2.32174	-2.63506	-1.40181
CDK12	-2.3256	-1.24884	-1.60762	-0.651197	-1.05992	-1.2002
CDK13	-0.167223	-0.627354	0.229429	0.377878	-0.227014	-0.0425021
CDK14	1.26504	0.692243	-0.429663	0.492829	-0.316362	-0.0725631
CDK15	0.044559	-0.408192	0.275106	0.291512	0.120085	0.523621
CDK16	0.460187	0.41318	-1.46077	-1.52965	-1.55726	-1.00727
CDK17	0.347562	0.188565	-0.51508	0.120314	0.247874	-0.0386009
CDK18	-0.0544387	-1.18789	-2.97791	-2.33333	-1.03539	-2.63191
CDK19	-0.176259	0.466983	1.52682	1.54904	0.918064	0.512577
CDK2	-0.399609	-0.732181	0.715871	0.895795	-0.995218	0.597265
CDK20	0.119424	0.527538	0.0184178	0.415546	-0.974397	0.591791
CDK3	0.0720637	0.599424	-0.740115	-0.649072	-0.616515	-0.750235
CDK4	-1.37891	-2.20648	-0.140957	-2.47336	-2.82228	-1.06302
CDK5	0.414154	0.213582	-0.107343	-1.53528	0.12829	-0.405671
CDK6	-0.655859	-0.380064	-0.943408	-1.31013	-1.91608	-0.751712
CDK7	-1.72992	-2.01727	3.19501	2.32158	2.0834	4.56704
CDK9	-1.66036	-1.31633	-1.55691	-2.3193	-2.34996	-1.67402
CDKL1	0.706514	1.06721	-1.8082	-1.52211	-1.87642	-1.31685
CDKL2	1.17631	0.0913686	2.33049	1.75138	0.810182	0.408409
CDKN1A	-0.196691	0.392644	1.86207	2.06124	1.99429	1.94361
CDKN3	0.726082	0.395182	-2.16646	-1.44819	-1.29846	-2.75703
CDS1	0.252397	0.592042	1.26909	1.01925	1.09294	1.28856
CECR2	0.734792	0.874282	0.19272	-0.609284	-0.028381	0.402328
CELA1	-0.304431	-0.154665	-0.264997	-0.206915	-0.627723	0.317556
CENPE	-0.942676	-1.08184	-1.42631	-1.22066	-1.4789	-0.343561
CERK	-0.196154	0.283421	1.24096	0.892843	0.713373	0.779254
CES1	-0.681172	-0.588036	1.65223	-0.483177	1.24026	-0.157418
CETP	-0.0067262	0.473221	2.34299	3.41439	1.03263	1.48583
CFB	0.412246	-0.0171236	-0.621913	-0.485325	-1.04575	-0.819822
CFD	0.624717	0.736514	2.01083	1.66565	0.700325	1.47992
CFTR	0.572668	0.354167	-0.441594	-0.176884	-1.04676	-1.25133
CH25H	0.758539	-0.0680605	-1.52932	-1.77067	-0.932482	-1.34204
CHEK1	-1.24715	-1.47643	1.34078	1.98827	0.377941	2.30638
CHEK2	0.304347	0.880099	0.729924	1.67019	0.274624	1.06076
CHKA	-1.21502	-0.397049	-1.89682	0.183706	-0.372013	-1.80317
CHRM1	0.203756	-0.207837	-0.913786	-0.684543	-0.181045	-1.00528
CHRM2	0.45867	0.369539	-0.943062	0.197592	0.150871	-0.346875
CHRM3	0.584016	0.283423	-1.27645	-1.02901	-0.19524	-0.988931
CHRM4	-0.845374	-0.914197	-0.183898	0.370606	0.561882	0.54637
CHRM5	0.798679	0.363075	-0.96256	-0.977619	-0.998643	-1.49011
CHRNA1	-0.17208	0.315324	-1.44053	-1.0483	-1.89783	-0.964109
CHRNA10	0.3997	0.36656	-0.732456	-1.10393	-1.44174	-2.84115
CHRNA2	-0.0167623	0.277552	1.87525	2.39796	1.36881	1.64232
CHRNA3	0.0196367	-0.038138	0.803794	-0.0132253	0.649813	0.697482
CHRNA4	0.544764	0.699508	0.405943	1.02187	0.465866	1.29049
CHRNA5	0.153653	1.01773	0.557687	0.350831	0.0417925	0.363843
CHRNA6	1.55421	1.62169	-0.200666	0.617171	0.568536	0.466606
CHRNA7	0.922438	0.091705	-1.31596	-1.27106	-1.04875	-1.0741
CHRNA9	0.446714	-0.16151	-1.26074	-1.4143	-0.0631593	0.452551
CHRNB1	1.06931	0.244179	0.213784	0.218415	0.927986	0.388554
CHRNB2	0.641482	0.0812738	-0.624728	-0.510382	-0.899364	-1.38545
CHRNB4	0.0653761	0.227314	-0.839265	-0.67347	-0.208646	-0.141728
CHRND	-0.437227	-0.474168	1.05652	1.45883	0.612976	0.701866
CHRNE	-0.0581047	-0.128592	1.42477	1.09139	0.874723	1.04128
CHRNG	0.789993	0.65811	-2.01377	-1.44413	-2.54974	-1.35706
CHUK	0.575727	0.306325	0.292052	0.663241	-0.0777028	0.700683
CIAO1	-2.21422	-1.89168	-0.648225	0.124416	0.828608	0.0755525
CLEC4C	0.0395082	0.508802	1.58621	2.20885	0.854183	0.148008
CLK1	0.375908	0.320768	0.278442	1.04266	-0.0461038	-0.754289
CLK2	-2.09573	-0.92457	-2.96458	-4.00409	-2.85512	-3.56091
CLK3	0.632329	0.46731	-0.665246	-0.997356	0.392074	0.493458
CLK4	0.950062	0.768918	0.0567841	-0.346543	1.19442	-0.465397
CLU	0.939951	0.137516	-1.58769	-1.0082	-1.27204	-1.11318
CMA1	0.558424	-0.05958	-0.218941	-1.12893	-0.387231	-0.505629
CNGA3	0.188766	-0.866982	-1.354	-2.03691	-0.468074	-0.543797
CNR1	0.28455	1.3912	1.89433	1.74704	1.73118	1.90171
CNTN1	0.332305	0.434556	0.16413	-0.381272	-0.823935	-0.035423
COL4A5	-0.0886942	0.0346987	2.2233	2.53606	1.85511	1.80206
COMT	0.103611	-0.103641	0.347275	1.79099	0.930803	1.30374
COPS6	-0.415814	-1.73087	1.36489	1.42189	1.91978	0.337471
CPA1	0.284184	0.874025	0.120554	-0.0469851	0.115037	-0.359463
CPB1	0.55826	1.07317	-0.398962	-0.39004	-0.329428	0.0951758
CPB2	0.613228	0.285038	1.42026	0.128532	1.02448	1.04794
CPM	-0.379994	-0.0765177	-1.04665	-0.400715	-0.702608	-0.616688
CPN1	1.20956	0.900822	1.12734	-0.410062	0.164244	0.269737
CPT1B	-0.0310786	0.980067	-0.046116	-0.869889	-0.4463	-1.32424
CPT2	-0.511412	0.471469	-0.136403	-1.46442	-0.562851	-0.120857
CRBN	0.96608	0.638439	1.30544	1.07747	0.409107	-0.0141022
CREBBP	1.35767	1.41141	1.01246	0.852269	0.443041	0.669568
CRHR1	-0.351413	1.15998	0.707022	-0.569982	1.3598	0.602637
CRHR2	-0.0480172	0.791369	1.88758	1.03672	-0.190732	1.80253
CSE1L	-1.61548	-2.18733	1.29134	1.17484	1.31496	-0.299021
CSF1	0.0431556	0.139126	1.4429	1.53325	1.3679	1.66219
CSF1R	1.08979	0.866362	0.134311	-0.420479	0.370034	-0.388828
CSF2	0.0834706	0.0291548	2.19015	2.94281	2.42792	2.57273
CSF2RB	1.03557	0.602999	0.898718	0.517473	0.681692	0.43162
CSK	-0.533735	-0.437489	-0.524426	-1.06652	-0.884402	0.289591
CSNK1A1	-2.89652	-2.54547	-3.13301	-1.96219	-3.4736	-1.80247
CSNK1D	-0.191344	-0.341236	0.150359	-0.534617	0.939859	-0.21401
CSNK1E	-0.0256029	0.466399	-0.307793	0.368357	-0.376622	1.00684
CSNK1G1	0.209127	0.0698332	1.56362	1.43527	2.11844	1.24441
CSNK1G2	0.503433	0.755555	0.56669	0.315537	-0.0939524	-0.0254196
CSNK1G3	0.833892	0.873347	0.295933	0.265949	0.199747	-0.15832
CSNK2A1	0.0653224	-0.214682	-2.58169	-1.41765	-2.43681	-2.95647
CSNK2A2	1.04662	0.725137	0.705233	1.52949	0.647724	1.07265
CSNK2B	-2.02986	-2.46067	1.54254	1.30315	0.601646	0.361024
CSRP2	-0.0581982	1.1108	-0.293231	0.0701123	0.194968	-0.440056
CSTF1	-0.809881	-0.705338	-1.29625	-1.11449	-0.655132	-1.38248
CCN2	-0.0686826	0.316081	-1.83842	-1.13518	-1.31378	-1.03831
CTH	0.510602	0.429837	2.18001	1.97674	1.79022	1.70903
CTLA4	0.0490329	0.207269	1.13259	0.0998202	0.437808	0.962476
CTRC	-0.277298	-0.275495	0.635702	-0.0542007	-0.0407004	0.41242
CTSA	0.100447	-0.232438	-1.67723	-1.20268	-1.51189	-1.64175
CTSB	0.829362	0.775459	0.880113	0.389119	0.158054	-0.26078
CTSC	0.721972	0.199978	0.789356	0.290153	0.610304	0.776407
CTSD	0.740559	0.93451	-1.60448	-2.12772	-2.03146	-1.27667
CTSE	0.246064	0.196826	0.366479	0.196546	1.03532	0.411204
CTSF	-0.704219	-1.21223	0.570693	-0.0243118	-0.978802	0.0608819
CTSG	0.133782	-0.118757	-1.12056	-2.14254	-1.10704	-0.711987
CTSH	0.92496	0.0592595	-0.516632	-1.12624	-0.547413	-1.04767
CTSK	0.603888	-0.122027	2.22505	1.93611	1.19878	0.569877
CTSL	-0.132337	-0.809767	1.00872	0.405126	0.558688	0.605977
CTSO	0.275964	1.384	0.0877038	0.941129	-0.5336	2.04842
CTSS	0.708265	1.49904	1.47569	1.3556	1.0979	0.63367
CTSV	0.306442	0.108988	0.449562	0.91671	0.739736	-0.433037
CTSZ	0.425769	0.26521	1.53356	1.22805	0.807178	2.34449
CUL4A	0.502569	0.419651	-0.280726	-1.0882	-0.396159	-1.09699
CXCL10	1.21257	0.729599	4.39038	5.05707	3.20264	3.03036
CXCL8	-0.111508	-0.250216	1.96287	1.62234	2.28731	1.82686
CXCR1	-0.245985	-0.171672	-0.46856	0.361227	-1.15742	-0.020942
CXCR2	-0.185156	-0.900366	0.332076	0.722278	0.977823	-1.16119
CXCR3	0.122943	-0.1802	2.07865	1.22223	2.2114	2.73193
CXCR4	0.424718	0.490369	1.17816	0.674847	0.059796	0.08018
CYP11A1	0.702871	-0.0457261	-1.77868	-0.994563	-1.31715	-1.41285
CYP11B1	0.610052	0.598373	-0.946578	-1.28167	-0.230575	-0.0230303
CYP11B2	0.727857	1.04027	-0.733364	-0.670496	-0.266679	-0.210779
CYP17A1	0.17804	0.0413593	0.820027	0.697963	2.1884	0.433899
CYP19A1	0.838492	0.922432	0.0572024	1.15785	1.39673	1.48542
CYP1A1	0.29418	0.158592	2.30479	3.2169	2.29594	2.10825
CYP1A2	0.612014	-0.287573	0.47667	-0.0855299	0.828523	0.131847
CYP1B1	0.567204	0.567418	0.135108	-0.767782	0.184213	0.619092
CYP24A1	0.745603	0.543028	-1.19172	-1.04848	-0.747064	-1.74121
CYP26A1	0.131662	-0.173658	-0.29533	-0.556401	-0.632039	-0.0656452
CYP27A1	0.251418	0.362619	-0.38926	-0.821929	0.558336	1.34506
CYP27B1	-0.372335	-0.283414	-1.51149	0.307007	-0.45643	0.495365
CYP2A6	0.150382	0.648882	-0.271049	-0.207604	0.221028	-0.0472377
CYP2B6	0.566924	-0.0924274	0.305348	-0.159162	0.0119927	0.911137
CYP2C18	0.476673	0.972147	2.07518	2.10869	1.67295	2.44299
CYP2C19	0.917418	0.587019	-1.28768	-0.427056	-0.485461	-0.612714
CYP2C8	0.864528	0.628417	3.44414	3.22964	3.02791	2.304
CYP2C9	0.197374	0.402683	0.671558	1.17488	1.43616	0.584401
CYP2D6	-0.0348708	0.271121	0.129517	0.479255	0.616762	0.515804
CYP2E1	0.600198	0.488967	2.38292	2.50774	2.67236	2.78693
CYP2J2	0.198348	0.181695	-0.117143	-0.0513237	-0.0470881	-0.0696559
CYP3A4	0.380442	0.359965	2.10727	1.78933	1.13374	0.782425
CYP3A43	-0.359772	0.855732	0.80932	1.45305	0.516304	0.543189
CYP3A5	0.970143	-0.375088	-1.67887	-0.225782	0.126707	-0.943149
CYP3A7	0.324856	0.580805	1.71277	1.06635	1.41276	1.39151
CYP4F2	0.0407388	0.423062	-1.03797	-0.546098	-1.01418	-1.23236
CYP51A1	0.394756	-0.133171	-0.613566	-0.659373	-0.528383	-1.02207
CYSLTR1	0.581167	1.18942	3.07133	3.14639	3.08312	1.92259
CYSLTR2	0.123972	-0.112122	0.477599	0.589114	0.731318	0.117926
DAPK1	0.501728	0.180973	0.37516	0.182674	0.159893	0.19559
DAPK3	0.119662	0.150298	-0.225377	-0.505099	0.0161781	0.00673612
DCLK1	0.652527	0.456634	1.11736	1.0026	0.659434	0.7952
DCLK2	0.314832	0.696355	2.47924	2.10069	2.02601	1.72098
DCLK3	1.18688	0.664278	-2.42417	-1.1421	-1.08112	-1.31496
DCPS	-2.35595	-1.49772	2.07095	2.50561	1.33982	3.03413
DDAH1	-1.0467	-0.623546	0.986854	-0.0920227	0.216786	0.863598
DDB1	-1.95624	-0.867799	0.199772	1.5197	-0.0855946	-0.846473
DDC	0.619509	1.08389	-1.18707	-1.36962	-0.816265	-1.2326
DDR1	0.452692	0.370703	0.797028	-0.322482	0.0751632	0.652258
DDR2	0.811359	0.329515	1.19199	0.914951	0.524138	0.279267
DEGS1	0.556696	0.592906	-1.75152	-1.01251	-1.5112	-2.22369
DEPTOR	0.241254	0.570922	0.0329863	-0.452213	-0.275472	0.089053
DGAT1	1.21318	0.681496	-0.563097	-0.235266	0.216533	0.131189
DGAT2	0.613905	0.686402	0.733934	0.578337	0.15221	0.332977
DHDDS	-1.16876	-1.71751	-2.36054	-3.72981	-3.46139	-3.37892
DHFR	-3.11579	-2.37306	-2.52999	-0.849152	-1.76337	-2.57289
DHODH	-0.134438	0.169223	-1.3874	-2.12699	-2.99007	-2.02912
DHX15	-1.79542	-1.12207	-3.40893	-1.832	-1.3575	-2.47679
DIO1	0.353433	0.697382	-0.141142	-0.288506	-1.44267	-1.43853
DKK1	-0.0175399	0.547537	2.0119	-0.143791	0.531674	1.2831
DLL4	0.452388	0.828398	2.2179	0.70485	1.78912	0.123363
DLX3	0.71074	1.16764	-0.815481	-0.620554	0.0329225	0.225238
DMPK	0.284347	-0.0699295	-0.452695	-0.897876	-0.258805	-0.397255
DNMT1	-2.1514	-0.950035	-1.63619	-1.83297	-1.65835	-2.57611
DNMT3A	0.130786	0.622927	2.1884	2.33458	1.8664	2.64719
DNPEP	-0.0541351	0.034138	1.00172	1.66276	2.12522	2.49316
DOT1L	0.944388	1.12092	0.688872	-1.73563	-1.61184	-1.83634
DPEP1	0.222241	0.863769	-0.713689	-0.251656	-0.521136	-0.0638771
DPP4	0.289935	0.29056	-0.654752	-0.384369	-0.95705	-1.00356
DPP7	0.0372478	0.601714	0.523948	0.184501	0.782732	0.0142441
DPP8	0.551699	0.287376	-1.1774	-2.04174	-1.91085	-1.30333
DPP9	0.238202	-0.517972	-1.05571	-1.07769	-0.19619	-0.508043
DRD1	1.04489	0.963012	0.745983	-0.6762	-0.174291	-0.116096
DRD2	0.187455	-0.0681773	1.02817	0.186429	0.445095	0.842013
DRD3	0.142912	0.882389	0.862688	1.14689	0.0637892	-0.039782
DRD4	0.186372	0.118034	0.894589	0.732371	2.58628	2.09186
DRD5	1.26782	0.695677	-0.313509	-0.102129	0.301388	-0.525765
DYRK1A	0.835457	0.832487	0.552841	1.63901	1.12411	0.629659
DYRK1B	0.336709	0.907807	1.91297	0.97496	0.224542	1.12173
DYRK2	0.797138	0.112376	-0.0648828	0.109424	-0.929366	-0.252136
DYRK3	-0.00478342	0.664278	0.109649	0.796885	0.535377	1.31243
DYRK4	0.232586	1.03146	2.01465	2.36354	1.9305	2.31593
ECE1	0.408281	0.722193	-1.72856	-2.15185	-1.05203	-1.77305
ECE2	-0.910592	-0.158473	2.40713	1.27219	0.205279	0.431604
ECT2	-2.53412	-2.11958	-1.69537	-2.83529	-1.89857	-4.48947
EDNRA	0.198493	0.181898	-0.107339	-0.0414765	-0.0374038	-0.0583849
EDNRB	0.619136	0.0830867	-0.375984	0.0438255	-0.61896	-0.347657
EED	-0.498452	-0.697068	1.0384	1.34056	0.771377	0.662835
EEF2	-1.98426	-2.61766	0.816082	0.959827	1.11391	0.483749
EEF2K	0.229121	0.773777	2.26667	2.25019	2.40986	1.40747
EGFL7	-0.477483	0.659255	0.398689	0.362269	0.680125	0.630453
EGFR	0.894604	1.1558	0.343022	0.224562	-1.56946	-2.74132
EGLN1	-2.31019	-1.8903	-1.9982	-1.84948	-1.94054	-1.68882
EGLN2	0.742171	0.252945	0.482778	0.817122	0.534268	0.665972
EGLN3	0.457782	0.711657	-1.19841	-0.271829	-0.99564	-0.995785
EHMT1	-1.33196	-0.778275	0.0911399	0.172651	-0.16021	0.393399
EHMT2	-1.52359	-0.883078	-1.90127	-1.32422	-1.87935	-2.1407
EIF2AK1	0.411275	0.745626	-1.84959	-0.531986	-0.127803	-1.65924
EIF2AK2	0.447111	-0.0686913	3.08957	2.22595	2.50584	1.85463
EIF2AK3	-1.00332	-0.432396	0.954853	0.178368	0.602974	0.575774
EIF2AK4	0.514151	0.578328	-1.84998	-0.314835	-1.27987	-1.10761
EIF4E	-2.70458	-2.61673	-2.75807	-1.7872	-2.82139	-4.55412
EIF5	-2.10874	-2.16139	-3.29303	-1.7095	-1.43309	-1.36637
EIF6	-4.29266	-3.9131	-1.00205	-3.78213	-0.404286	-4.21049
ELANE	0.289202	0.57681	-0.283587	-0.660595	-0.873279	0.363932
ENG	0.15929	0.447966	0.27241	0.521744	0.457162	0.164246
ENPEP	0.20642	0.112077	-0.513455	-1.36295	-0.429071	-0.253647
ENPP2	0.443188	0.817044	0.00439284	-0.634809	-0.400856	-0.420369
ENTPD1	1.4369	-0.595769	2.72211	2.05063	1.84089	2.47358
ENTPD2	0.462523	0.159659	-0.0603388	1.5598	0.418247	2.03963
EP300	-0.519655	-1.81236	-0.940613	-0.0779784	-0.904896	-0.811058
EPCAM	0.104685	-0.133428	-1.68847	-0.220663	-0.98266	-1.49771
EPHA1	-0.150854	0.508778	2.00968	2.28577	1.81415	1.17135
EPHA10	0.119732	0.281704	0.469013	0.389045	1.55338	-0.0573875
EPHA2	0.900979	0.570782	0.635295	-0.135446	0.521704	0.873732
EPHA3	0.412928	0.121983	0.965991	-0.368131	0.36041	0.519179
EPHA4	0.938713	0.86162	0.709509	0.790843	-0.23722	0.614113
EPHA5	-0.756594	-0.010449	-0.954192	-0.280795	-1.01026	-1.58295
EPHA6	1.09346	0.293948	-1.06214	-1.69265	-1.85911	-0.883409
EPHA7	0.705533	0.642948	0.225554	-0.228672	-0.211482	0.211364
EPHA8	0.526036	-0.00628352	1.0015	1.94155	1.77368	1.41034
EPHB1	0.239614	0.106624	1.36392	1.31028	2.11206	2.03541
EPHB2	0.342343	0.371618	0.728358	0.329018	1.37102	1.33426
EPHB3	0.601833	-0.0458523	-0.853219	-0.418132	-1.34201	-0.982683
EPHB4	0.333071	0.467194	1.27877	0.848926	1.08911	1.21789
EPHB6	0.696263	0.580034	-0.225212	-0.446747	-0.451314	-0.901907
ERAP1	-0.256306	0.206676	0.154959	1.02788	-0.0783112	-0.855893
ERAP2	0.339707	-0.311776	2.17696	1.75632	0.552774	2.02984
ERBB2	0.964936	0.300961	1.44971	1.0636	1.22155	0.406912
ERBB3	-0.0905622	0.0888105	0.78654	-0.132987	1.32755	1.22725
ERBB4	0.214224	0.0294328	-0.408885	0.0467667	0.902778	-0.0515988
ERG	-0.677482	0.304818	1.79375	2.53756	2.47654	3.50038
ERN1	-1.01681	-1.34619	-0.462294	-0.237133	0.319967	-0.399942
ESR1	0.00413422	0.815806	-0.665219	-0.221765	-1.1073	0.184831
ESR2	0.637209	0.683412	1.54874	0.619236	1.07549	1.22711
ESRRA	0.00482773	0.0298603	-1.6839	-2.38983	-2.1179	-1.01797
ESRRB	-0.0928039	-0.0202776	-0.303776	-0.129371	0.0552024	-0.608813
ESRRG	0.924143	0.868418	-1.17419	-0.773466	-0.444571	-0.206276
EZH1	-1.11851	0.227295	-0.173962	0.817214	1.44246	1.54346
EZH2	-1.38984	-1.10278	-0.127295	0.572479	0.328692	-0.582844
F10	0.728557	0.827814	-0.924281	-0.851614	-0.16636	-0.470553
F11	0.867424	1.1525	1.02114	0.185661	0.689173	0.417507
F12	-0.0471766	0.116677	1.69542	0.665684	1.11642	-0.64246
F2	-0.394892	0.193985	-1.17772	-0.116121	-0.485374	0.20422
F2R	0.466142	1.1387	1.12831	0.640679	1.52521	1.50116
F2RL1	0.483258	0.822838	0.286195	1.16946	1.82759	1.26765
F2RL3	0.262223	0.105381	-1.30195	-1.23805	-1.15451	-1.00985
F5	0.11586	0.274179	1.73094	2.30035	0.958648	0.817066
F7	0.835363	-0.284629	0.800346	0.798554	0.511962	0.782256
F8	0.511793	1.80994	-4.2548	-3.40158	-3.43025	-3.88664
F9	0.848019	-0.208024	-0.631639	-0.125849	-0.473138	0.349151
FAAH	-0.751504	0.486467	-1.42636	-1.80224	-1.22785	-2.39572
FABP3	0.412111	0.516208	-0.726695	0.0630851	0.570627	0.0512073
FABP4	0.454653	0.529548	0.487573	1.67755	0.9301	0.727369
FABP5	0.527928	0.703924	-3.89985	-3.16748	-3.49195	-4.75459
FAP	-0.0291359	0.260047	0.909044	0.815391	0.279599	0.0378005
FARSA	-1.474	-1.66649	-0.851414	-1.00892	-1.8075	-0.834494
FASN	-0.193142	-0.734985	-2.3499	-1.50869	-1.82094	-2.18595
FBL	-4.93457	-3.3447	-1.30867	-1.47576	-2.23975	-0.478741
FBP1	0.332807	0.71126	-1.09545	-0.815718	-0.526532	-0.622994
FCER2	0.403023	-0.149034	-1.26812	-1.32269	-0.86201	-1.42561
FCGR2A	-0.111508	-0.163706	0.241977	1.25664	0.217128	1.0973
FDFT1	-0.392043	0.832977	0.697307	-0.0960262	0.216639	-0.830883
FDPS	-1.54503	-0.827523	-1.12415	-1.985	-2.21409	-1.21621
FER	0.387924	0.241677	1.13649	1.11288	0.898174	0.881484
FES	0.948684	0.449578	-0.516511	-0.935464	-0.401655	-1.18078
FFAR1	0.21819	-0.194824	-0.858806	-0.279164	-0.0707288	0.702071
FFAR2	1.18555	0.578375	1.10176	0.969008	0.000163169	0.195175
FGA	0.585978	0.373006	0.229891	0.231525	0.543919	-0.316028
FGB	1.02422	0.478805	-1.78149	-1.60689	-1.25475	-1.94006
FGF1	0.349617	0.229454	-0.50231	-0.281194	-0.490899	-0.741095
FGF2	0.616287	0.607531	-0.466874	-0.321931	-0.247098	0.234239
FGF23	0.551185	0.792911	-0.41503	-0.341193	-0.238103	-0.351844
FGFR1	0.919519	0.702172	3.29162	2.3926	3.0213	2.32688
FGFR2	0.18245	0.411101	0.168281	1.45187	1.33885	1.51606
FGFR3	-0.895368	-1.37908	-1.45301	-1.29786	-1.00148	-1.42816
FGFR4	-0.0532712	-0.400623	0.046113	1.39698	1.43512	-0.0319474
FGG	0.466399	0.55055	0.546682	1.44772	1.82946	1.22729
FGR	1.15912	0.482636	-0.807158	-0.810434	-0.426219	-0.987926
FKBP1A	-1.22699	-1.4884	-0.24553	-1.49373	0.341688	0.301334
FLT1	0.0881547	0.218186	0.518534	1.89841	1.99454	2.0789
FLT3	0.577525	0.213483	2.18354	1.43716	1.98372	0.653314
FLT4	0.615446	0.409325	-0.995591	-0.349281	-0.395566	0.455851
FNTA	-1.28416	-1.43132	-1.95134	-0.73979	-1.19157	-1.89143
FNTB	-1.86337	-1.53456	-2.729	-2.94667	-1.95306	-3.82302
FOLH1	-0.386556	-0.581891	0.668639	0.756906	-0.216136	-0.520345
FOLR1	1.14948	-0.399105	0.258555	0.316295	0.37761	0.998411
FPR1	1.13736	0.587182	-0.348681	0.377973	0.731869	0.00787906
FPR2	0.702614	0.718175	-1.22132	-0.225946	0.317739	0.455031
FPR3	0.886525	0.750321	0.763161	0.707811	1.11985	0.602106
FRK	1.01822	0.355681	-0.925783	0.132742	-0.758747	-0.107185
FSHR	0.768347	0.831225	-0.158588	0.211074	0.724339	0.178189
FURIN	-0.605025	-0.166509	0.889733	1.00416	1.5903	2.30461
FXYD2	0.546772	1.03688	3.18483	2.26299	2.50281	3.30971
FYN	0.932222	0.0772695	-0.278174	0.620959	-0.225758	-0.210204
FZD1	0.0434148	0.278143	-0.549871	1.56738	0.961347	0.826227
FZD2	-0.460134	-0.347497	-0.897779	-0.114564	-0.755285	-0.0578908
FZD5	0.622522	0.987542	-1.23012	-1.8516	-1.62267	-1.19656
FZD7	0.112587	0.595172	0.822306	1.21361	1.68295	1.65049
FZD8	0.287887	0.245924	0.382818	0.524666	1.94534	1.25197
GAA	0.752492	0.470067	1.17468	1.37649	1.07942	1.05127
GABBR2	0.332361	-0.151698	0.929207	1.71169	0.662165	0.686309
GABRA1	0.954802	0.944229	-1.11535	-0.338789	-0.530538	-0.497765
GABRA2	0.814931	0.977286	-1.42565	-1.45202	0.343201	-0.78696
GABRA3	0.564915	0.813213	-0.187875	-0.161742	0.00334828	0.112559
GABRA4	0.483188	0.960582	1.82398	1.78549	1.96863	1.40899
GABRA5	1.3697	0.918764	0.101491	0.0119398	0.188419	-0.127818
GABRA6	-0.0877835	1.00238	1.76581	1.71259	0.82415	0.917233
GABRB2	0.735329	0.402237	0.518903	0.377897	-0.104136	1.47501
GABRR1	0.796858	0.0310308	-0.689696	-0.229109	0.689991	0.320853
GABRR2	-0.267794	-0.313295	-0.800257	-0.537185	0.276902	0.947707
GABRR3	-0.571633	0.414418	1.43405	1.35261	0.820172	-0.26307
GAK	-1.39213	-1.31348	-0.696475	-0.605622	-0.408381	-0.026521
GALR1	0.354876	0.87024	1.05177	0.686118	0.752767	0.601417
GALR2	0.616637	0.187847	-0.0822118	-0.253599	-0.696066	-0.267807
GALR3	0.792071	0.713946	-0.516594	-0.210337	-0.691541	-0.900512
GART	-0.202739	-0.325023	0.0222215	-1.21227	-0.772274	-0.461246
GBA1	-1.55673	-0.684101	-1.62677	-1.4709	-0.15509	-2.10656
GC	-0.160101	-0.381676	1.23058	1.77767	1.12715	1.10402
GCGR	0.202431	0.844729	-1.46011	-1.23233	-0.97954	0.00480774
GCK	0.827751	0.981328	1.33524	0.867982	1.02974	1.17033
GDF2	-1.04371	0.305744	-0.953502	-0.282772	0.00658454	0.92315
GGCX	-0.0222824	-0.741713	-1.5398	-1.6339	-1.16959	-1.65644
GGPS1	-1.2379	-1.67527	-1.67196	-1.90852	-1.50045	-0.387433
GHR	0.489166	0.830945	1.22436	2.20615	1.71327	0.751918
GHRHR	0.558307	0.614072	1.67479	2.47084	2.02599	1.90474
GHSR	0.435132	0.496443	-0.122927	0.369888	0.148772	0.313195
CBLIF	-0.420858	-0.121093	0.889892	-0.0192479	0.236354	0.567851
GIPR	0.336216	0.268471	1.98965	2.82648	3.40347	2.21132
GJA1	-0.488995	-0.498511	0.487552	-0.472784	0.587736	-0.184495
GJA4	0.487438	0.626198	-0.379238	-0.140069	0.615425	0.818317
GJA5	0.687857	0.187197	0.310425	0.966068	0.160843	0.696699
GJA8	0.213883	0.399111	0.569014	0.335498	0.254379	0.292696
GJB2	0.526527	0.954835	1.07545	-0.579915	-0.258494	0.240905
GJB3	-0.444886	-0.195876	-1.59753	-1.54327	-2.24662	-1.29012
GJB4	-0.295091	-0.348128	2.1675	3.04655	1.06552	0.256599
GJB5	-0.237298	-0.261641	-0.0806355	0.51661	0.712355	0.482482
GJB6	0.246293	0.254283	-0.532906	-0.544584	-0.360399	-0.315899
GJC2	-0.0867327	-0.414033	-2.49436	-3.11611	-3.0903	-2.3116
GJD2	-0.263614	-0.110486	0.337988	0.736784	0.440155	0.73972
GJD3	0.408536	0.747939	-0.863633	-0.551985	-1.0468	-0.941931
GJD4	0.779275	1.2085	1.88881	1.67657	1.56499	2.31717
GLP1R	0.320368	0.775319	0.0470938	0.531108	0.26171	-0.0713288
GLRA3	-0.511902	0.100305	1.19933	0.82402	0.515663	0.140456
GLRB	0.267806	0.402777	0.919295	1.89263	0.430796	0.629729
GLS	-0.103779	-0.235358	1.19288	1.3414	0.269922	1.74772
RACK1	-2.9082	-3.28115	-3.04046	-2.14639	-2.44271	-2.7677
GNG7	0.491758	0.512049	1.2207	1.39978	1.32752	1.69338
GNRH1	1.37523	0.90262	-0.0255942	0.228977	0.201738	-0.38079
GNRHR	-0.748865	-0.142166	1.31792	1.82653	2.30214	0.410403
GP1BA	-0.676081	-1.16955	0.461964	0.726349	0.384548	1.74861
GP2	1.04064	1.03137	0.729531	0.0104192	0.653498	-0.127287
GPD2	-0.141327	-1.09794	0.2062	-0.259855	-0.378327	-0.796535
GPER1	0.688721	0.441962	1.57313	0.440823	1.42709	1.39486
GPN2	-3.5891	-3.71989	-2.563	-2.90414	-2.3275	-4.38884
GPN3	-0.740692	-0.619435	-0.9873	-1.14855	-1.27691	0.943901
GPR139	1.01815	0.527632	0.0918952	-0.113571	0.75028	0.0723726
GPR55	-0.381232	-0.440923	0.857209	-0.00911096	-0.52841	0.181498
GPR87	0.769327	0.465138	-0.42686	0.623447	-0.0242032	-1.00135
GRIA1	0.666654	0.778146	1.49241	2.3809	2.32891	2.23867
GRIA2	0.639568	0.741561	-0.778121	0.0104179	-1.02505	0.26507
GRIA3	0.373073	0.814124	0.170245	0.185456	1.24473	0.753699
GRIA4	0.36243	-0.107169	0.76603	1.17463	1.44463	0.660702
GRIK1	0.100862	-0.302595	0.87254	0.334507	0.589277	0.593645
GRIK2	0.3241	0.375181	1.36141	1.06255	1.0804	1.99847
GRIK3	0.811919	-0.131629	-0.180167	0.134509	-0.729944	0.219517
GRIK4	1.49803	0.997985	1.24185	1.08899	1.8021	2.15229
GRIN1	-0.0168581	0.85363	-0.0955049	0.439259	0.819793	1.09087
GRIN2A	1.15774	0.552513	0.653772	1.86164	1.07777	1.45242
GRIN2B	0.182797	0.415423	-0.355897	0.209676	0.656228	0.248698
GRIN2C	0.314222	0.661381	-0.0489799	0.604273	0.589331	1.2848
GRIN2D	0.296985	0.172157	-0.82421	0.201266	0.118704	-0.307584
GRIN3A	0.86245	0.723128	0.441799	-0.88861	0.236583	0.0899975
GRIN3B	-0.342797	-0.156931	0.153319	-0.134983	0.0440334	-0.211057
GRK4	0.147335	0.782678	-1.32249	-0.849883	-1.2709	-0.703856
GRK5	0.517887	0.766698	0.71543	0.488392	0.746029	0.618303
GRK6	0.79973	0.348163	-2.68457	-2.60665	-2.04889	-0.812452
GRK7	0.0978149	0.40095	-0.681252	-1.1992	-0.90293	-0.858927
GRM1	-0.275336	-0.28804	0.926077	0.436958	1.71413	1.14405
GRM2	0.241559	0.0960621	-0.384262	0.214603	0.483723	0.873809
GRM3	0.629293	0.89414	-0.377193	-1.44827	-1.74588	-1.52761
GRM4	0.427403	0.0295309	1.0857	1.98739	1.6046	0.878737
GRM5	0.350094	0.575198	0.244677	0.204902	0.993788	0.958722
GRM6	0.681762	0.588257	0.360789	1.50927	1.1859	0.938835
GRM7	0.318451	0.561881	0.0441305	0.262656	0.405424	0.274085
GRM8	0.138945	0.782048	-0.0363707	0.813757	1.1233	0.327373
GRPR	1.2387	0.82674	-0.470174	-0.580418	-0.778668	-0.326775
GSK3A	1.1166	0.372843	0.549738	0.202992	-0.474001	-0.693383
GSK3B	0.931685	0.41832	2.19451	2.06294	2.52653	2.39798
GSR	0.715551	0.6365	0.932786	1.19477	0.932818	1.09889
GSTP1	0.176365	-0.336213	-2.16982	-2.04625	-0.923618	-1.37472
GUCY1A2	0.920103	0.29524	0.234213	-0.257993	0.128039	-0.0529473
GZMB	-0.996056	-0.654361	2.47284	0.497297	3.83497	3.42486
HCFC1	-1.09347	-0.738582	-1.54267	-1.47181	-0.999028	-3.14349
HCK	-0.115104	0.254365	0.696771	0.0993284	-0.225289	0.862301
HCN4	0.0054185	0.164361	-0.138068	-0.258996	-0.330317	-0.635879
HCRTR1	-0.677459	-0.18576	-0.394495	-0.712604	-0.201234	-0.289723
HCRTR2	0.700513	0.193829	1.44898	0.887087	1.08912	1.96478
HDAC1	0.109696	-0.159804	-0.188917	-0.683275	-0.482475	-0.529727
HDAC10	0.056337	0.177433	-1.05857	-1.28829	-1.12401	-1.09052
HDAC11	0.368438	-0.3685	-0.374382	-1.04444	-0.61966	-0.381978
HDAC2	0.497572	0.151179	-0.738123	-0.663665	-1.20858	-1.43982
HDAC3	-2.05333	-2.53426	0.963222	-0.320414	0.985402	0.854095
HDAC4	0.131858	0.297125	1.42383	1.91231	2.36478	1.04068
HDAC5	0.51742	0.0745781	-0.076553	0.656399	1.70785	0.50953
HDAC6	-0.0394312	0.16478	0.371437	2.14344	-0.556436	-1.87249
HDAC7	-0.568224	-0.100955	3.17226	2.80542	3.13866	3.06311
HDAC8	0.00851481	-1.53853	1.16844	0.0152357	-0.173111	0.0910611
HDAC9	0.801458	0.750508	0.703615	0.261516	1.0171	1.07057
HDC	0.488255	0.394027	1.16249	2.36619	2.24695	1.91474
HEATR1	-1.35858	-0.644689	-2.72544	-2.02403	-0.680321	-0.812141
HEBP1	0.524729	-0.296194	0.0183125	0.288949	-1.06468	0.0124111
HGF	0.62495	0.227583	-0.447859	0.582326	0.785105	1.39615
HIF1A	0.135708	0.232584	-0.615412	-0.779498	-1.38533	-0.446974
HIPK1	-0.0502823	0.161116	-1.75184	-1.04458	-0.672987	-1.70525
HIPK2	0.506725	0.0725246	0.174571	-1.47895	-2.26199	-1.49859
HIPK3	0.960873	0.372081	1.8178	2.17368	1.69246	1.87873
HMGCR	-0.578195	-1.08958	-1.97513	-1.51266	-2.93932	-0.237256
HMGCS1	-0.665363	-0.651698	-3.82285	-3.0329	-3.2485	-2.74285
HMOX1	1.09997	0.962288	1.07592	1.12677	0.361765	-0.0815633
HNF4A	-1.19834	-1.09659	-0.0976948	0.607591	0.0898145	-0.677974
HNMT	1.12678	0.446378	-1.68464	-1.97916	-1.8441	-2.19616
HNRNPK	-1.50716	-1.2412	0.739472	0.385836	-0.390089	-1.33792
HPD	0.937733	0.233304	-0.756477	0.35299	0.664739	-0.0489721
HPGD	0.455307	0.352461	-0.625627	-0.511735	-0.113868	-0.558537
HPGDS	0.326477	0.249258	-0.230655	0.288221	-0.139427	0.127835
HPSE	0.899461	0.330573	0.200721	-0.246511	0.435216	0.779486
HRAS	-0.36965	0.048111	0.516551	-0.180063	-0.205672	-0.252234
HRH1	0.734605	0.254959	-0.397556	0.0790002	-0.373182	0.0695603
HRH2	0.33942	0.430281	-0.213427	-0.510016	-0.338926	-0.919724
HRH3	-0.194846	0.0265008	-1.77694	-1.89623	-1.33861	-1.36473
HRH4	0.946886	1.03513	-1.1532	-1.26759	-0.501142	-0.159982
HSD11B1	0.967178	0.338498	1.01763	1.19229	0.883096	1.79806
HSD3B2	-0.780272	-0.0765644	-1.81872	-1.15912	-2.25967	-0.861088
HSP90AA1	-0.499316	0.0493258	-1.40064	-0.0302714	-0.662245	-0.849995
HSP90AB1	-0.0266887	-0.625719	-0.299523	-0.240222	-1.49713	-0.248495
HSP90B1	-1.89436	-1.58229	-1.30473	-2.7038	-1.45334	-2.6535
HSPA5	-2.0708	-3.0223	-0.317455	-2.56811	-3.81098	-3.97603
HSPA8	-2.44959	-3.93156	-3.75442	-4.46035	-5.56133	-3.89806
HSPB1	-0.486987	0.127013	1.61893	1.33477	1.57398	2.53734
HTR1A	0.501985	0.536837	-0.298896	-0.117101	0.0231292	0.0442143
HTR1B	-0.103639	-0.25309	0.574007	0.58891	1.04947	0.751192
HTR1D	0.649328	0.276288	-1.38484	-0.70946	-0.391208	-1.23565
HTR1E	0.343441	0.606877	-0.170566	-0.282221	0.436283	-1.01058
HTR1F	-0.164514	0.364446	-0.140537	0.792068	-0.85987	-1.75693
HTR2A	1.24608	0.806368	0.3773	-0.19933	-0.132414	-0.331287
HTR2B	0.0578315	0.785342	0.527831	-0.327324	-0.0544833	0.0702171
HTR2C	0.587542	1.36419	-2.13815	-1.38373	-1.56695	-3.6708
HTR3A	1.15907	-0.483676	-1.46886	-0.685395	-0.412421	-0.944204
HTR3B	0.346105	0.960512	0.358444	0.630233	0.984985	0.500559
HTR3C	0.841901	-0.147913	-0.280007	1.04699	0.94175	0.695086
HTR3D	0.480362	0.335143	0.282458	0.463631	0.0985891	-1.58055
HTR3E	0.822754	-0.237905	0.159908	-0.0402787	1.48526	0.350866
HTR4	1.03975	0.745672	1.35314	0.312112	0.384253	-0.138539
HTR5A	0.453206	-0.117892	-0.338248	0.0220315	-0.115178	-0.187815
HTR6	0.64704	0.327837	0.517257	-0.558517	0.0552125	0.835016
HTR7	-0.0597626	-0.242624	0.458192	1.19107	0.427565	-0.203306
HTT	0.37127	0.191978	1.02435	0.234488	0.564377	0.510228
ICAM1	0.841621	-0.0458593	-0.483575	-1.05531	-0.371663	-0.492106
ICAM3	0.141798	0.260143	-2.55977	-3.39899	-2.00115	-1.90446
ICE1	-0.62569	-0.70202	-1.09429	-1.27225	-1.63463	-1.61849
IDE	-0.385879	0.0339791	-2.79549	-3.31802	-2.61217	-3.55119
IDH1	1.11452	0.313301	-2.21378	-0.840656	-1.74183	-1.57974
IDH2	-0.604161	0.434977	-0.325211	-1.03774	-0.544415	-0.725219
IDI1	-1.0336	-1.19195	0.0295013	0.236859	0.388408	-0.580458
IDO1	0.550648	0.374856	2.36231	2.96576	2.70214	2.32401
IFNAR2	-0.0139789	0.470044	0.783228	0.609475	2.02138	0.791181
IFNG	0.319808	0.589589	-0.188318	0.364167	-0.60536	1.36131
IGBP1	-2.62916	-1.76505	0.808596	-0.524544	-0.713162	1.22951
IGF1	0.470158	0.249282	1.12762	1.10825	0.791034	1.74716
IGF1R	-0.895204	-0.780821	-0.979931	0.833387	0.415329	0.35997
IGF2	1.03574	1.04733	0.0348469	0.0124004	0.353377	0.451396
IKBKB	0.692223	0.436986	1.90795	1.99415	2.27329	1.64244
IKBKE	-0.33341	-0.354903	0.32228	-0.443917	-0.327049	-0.00288277
IL10	0.5938	0.259126	0.337277	-0.447378	-0.124573	-0.890135
IL12A	0.541728	0.0716041	0.198005	0.485158	0.125732	0.421965
IL12B	0.722836	0.103842	-0.776188	-0.853426	-0.179978	-0.229227
IL13	0.635528	1.16042	0.873036	1.59496	2.44075	1.99299
IL15	0.588616	0.36838	2.9629	2.77756	3.23933	2.56042
IL17A	0.0184342	0.227298	1.8569	1.44472	1.75026	1.55082
IL17RA	0.278222	0.0986273	-0.95137	-1.42183	-0.986381	-1.30492
IL1A	0.440573	-0.131723	-2.94623	-2.53825	-3.62039	-3.53114
IL1B	0.545628	1.08148	1.44865	1.40593	1.48669	1.51987
IL1R1	-0.429801	0.383573	-0.773903	1.24076	-0.723672	-0.771128
IL1R2	0.216518	-0.399502	-1.55995	-0.327481	0.199115	0.71418
IL22	0.357342	0.388549	-0.811468	-0.74311	0.500567	-0.494445
IL23A	0.201011	0.0693637	0.368515	0.340276	1.47424	0.62726
IL2RA	0.487998	0.80249	1.23473	0.904699	1.42172	1.646
IL2RB	0.845848	0.651405	0.933382	0.356468	0.655691	0.755601
IL2RG	0.480596	0.653578	1.70453	0.68126	0.903233	0.55803
IL4	0.339144	0.158204	0.00816021	-0.907556	-1.02358	-1.0823
IL4R	1.14352	0.0340025	1.09824	0.461478	0.81651	1.67178
IL5	-0.549637	-0.604132	0.625521	0.828065	1.39656	0.642825
IL5RA	0.634103	0.639935	0.103344	-0.0942938	1.38146	0.245714
IL6	0.740583	1.02712	1.45001	1.10049	1.46339	1.68053
IL6R	0.944061	0.873534	-0.736256	-0.928715	-0.5894	0.506409
IL6ST	0.745556	1.1308	0.930589	0.380342	-0.632501	-0.0638705
IL9	0.808627	0.0926349	1.02983	3.31454	1.96798	2.67862
ILK	0.686619	0.0573741	1.48246	0.705708	1.04075	1.25148
IMPA1	0.612971	0.651359	-0.0952842	0.175489	0.752296	0.505138
IMPDH1	-0.15424	-0.183891	-1.37567	-0.522669	-1.89447	-0.924964
IMPDH2	-0.69259	0.0281385	-0.013785	0.549715	0.29524	1.115
INHBA	-0.0587819	0.732379	1.16032	1.65135	0.604099	1.30839
INPP5A	0.141742	-0.305375	0.439152	0.699774	0.437835	0.164679
INPP5D	0.278484	-0.0153271	0.0463387	-0.121851	-0.143779	0.70941
INPPL1	0.399125	-1.01991	1.8293	1.06524	1.23133	2.03534
INSR	-0.644394	-0.176088	-0.128322	0.110963	-1.07839	-1.66482
INSRR	0.49881	0.717918	0.0719164	-0.0822321	0.489837	0.0847298
IRAK1	1.21243	0.277319	0.0690119	0.981593	0.675598	0.146007
IRAK3	0.400582	0.91582	1.30204	1.37042	1.16076	0.353827
IRAK4	0.296532	0.600569	0.789819	1.37834	0.798647	0.727887
ISG15	-0.215021	0.444532	0.58709	0.400922	1.54476	0.267497
ITGA2	0.542242	1.12912	-0.177828	-0.124734	0.15454	-0.328926
ITGA2B	0.645265	0.855265	0.236106	0.19714	0.880451	0.0905523
ITGA4	0.510205	0.394892	0.79222	0.54245	1.05492	-0.0603767
ITGA5	-0.376398	-0.373056	0.815476	0.108469	-0.218361	0.441486
ITGAL	0.137532	0.331982	0.0833021	-0.0574243	-1.80463	-0.638619
ITGAM	0.0506792	0.236888	2.14618	1.02096	2.35607	1.01958
ITGAV	-0.615486	-0.532223	-0.0248756	-0.143459	0.215839	0.407051
ITGB1	0.805568	0.769525	0.58106	0.784289	1.43191	1.79111
ITGB2	0.358775	0.91846	0.210364	-0.0774068	0.539508	0.784996
ITGB3	-0.104853	0.180662	-1.13153	-1.14951	-1.65697	-0.726641
ITGB5	-0.488808	-0.215009	1.24204	0.906349	1.82024	1.11212
ITGB6	-0.197952	0.0125722	-0.798771	0.85702	-0.414296	-0.15406
ITGB7	0.232794	-0.220056	1.53981	1.95551	2.46168	1.8084
ITK	-0.310012	-0.173191	1.33567	0.694822	-0.494214	-0.329501
ITPKA	0.140316	0.356914	0.0579413	-0.25927	1.26469	1.26164
ITPKB	-0.787487	-1.99337	0.0283434	0.753554	1.07104	-0.402855
ITPR1	0.227888	-0.248114	0.0981022	-0.126888	-0.282185	0.218972
ITPR2	0.57122	0.198968	1.00039	-0.205143	0.249598	-0.224906
ITPR3	1.00776	0.48857	-0.0388637	0.395243	0.788937	-0.709353
JAK1	-0.00374665	0.0410135	0.486006	-0.25193	-0.435631	-0.939421
JAK2	1.19155	1.54749	-0.735008	-0.791908	-0.698106	-1.17948
JAK3	-0.316667	0.239432	0.0473244	-1.32714	0.00840559	-0.926799
JUN	-0.856115	-1.01694	-0.133264	-0.14367	-0.626656	-0.463322
KARS1	-1.97233	-1.99202	-0.506372	-0.183458	0.83273	-2.5228
KAT2B	0.479428	0.378027	-0.707306	-1.01754	-0.303261	-0.74955
KAT5	-1.52402	-2.18546	-4.22991	-4.12594	-4.12351	-3.32278
KAT8	-2.01949	-1.44807	-1.91981	-2.51719	-1.87494	-2.1549
KCNA1	0.544834	0.550387	2.21806	1.50489	1.50275	1.4317
KCNA10	0.788638	0.590804	1.14511	-0.196595	0.332944	0.261768
KCNA2	0.300901	0.603232	1.12621	0.998158	1.01724	0.292907
KCNA3	0.455424	0.00571303	0.671682	1.77099	1.43548	1.77428
KCNA4	0.270526	0.282715	1.76331	1.38241	0.980122	1.06804
KCNA5	0.547029	1.03602	-0.0474537	0.81495	0.987802	0.541398
KCNA6	-0.0857286	-0.293413	-0.517694	-0.22041	-0.0324498	0.318312
KCNA7	0.981095	1.19797	0.194454	0.606038	0.292676	0.203429
KCNB1	1.15099	0.830291	-0.654361	-1.05995	-0.899258	-0.575891
KCNB2	0.500421	0.763848	1.08184	0.778885	1.33548	0.688608
KCNC1	0.826887	-0.34411	-0.478257	-0.345491	-0.990711	-0.392191
KCNC2	0.293043	0.455326	2.10084	2.55658	2.33822	2.01605
KCNC3	0.555225	1.08893	-0.659131	-0.202522	0.0824412	0.563625
KCNC4	0.658528	0.320852	1.02912	0.416846	1.08554	1.26173
KCND1	-0.906763	-0.179499	-0.882472	0.496356	-1.43501	-0.348951
KCND2	0.94294	0.411498	0.215024	0.476751	0.839731	1.50958
KCND3	-0.252616	-0.126163	-0.964551	1.98786	-0.0574359	-0.881013
KCNF1	0.911907	1.14199	0.730505	-0.0833659	0.523112	0.38513
KCNG1	-0.590337	0.154278	1.55804	1.00381	1.61398	0.801291
KCNG2	0.983407	1.00995	-0.109629	-0.81159	-0.144841	0.178654
KCNG3	-0.123627	0.10786	-0.240212	1.1969	0.685728	0.808946
KCNH1	0.203929	1.06401	0.620118	0.814377	0.259396	0.156158
KCNH2	0.0076018	0.484528	-1.451	-1.12989	-0.831456	0.135479
KCNH3	-0.146184	-0.0933853	-0.545399	-0.231894	0.259532	0.593824
KCNH4	-0.270199	0.0108995	0.14076	0.709575	1.32242	1.10349
KCNH5	0.732527	0.0879998	0.111	0.907243	0.154748	-0.146107
KCNH6	0.298696	0.132732	-0.480876	-0.303079	-0.280972	-1.11439
KCNH7	0.13466	0.0107943	1.67383	0.927339	0.954087	1.37987
KCNH8	-0.0545788	1.06655	1.15746	0.282147	0.331651	0.165333
KCNJ10	-0.0348755	-0.358618	1.65849	1.63831	0.149046	1.76437
KCNJ11	0.926197	-0.0105425	0.159357	0.732042	0.236813	1.71622
KCNJ12	-0.205705	-0.52713	1.32684	0.719933	0.484646	1.02306
KCNJ14	0.498249	0.842159	0.0746602	1.67653	0.558806	1.2267
KCNJ2	0.131498	0.119913	0.760026	1.42865	1.25913	0.637194
KCNJ5	0.891965	1.97761	0.811498	0.394395	0.737577	1.22476
KCNK13	0.46787	0.387488	0.363564	0.457977	0.996803	1.19201
KCNK18	0.1789	0.814241	-0.74105	-0.204909	0.584069	-0.497768
KCNK3	0.709036	0.656452	0.158621	0.451602	0.633621	0.904158
KCNK9	0.415693	0.768053	-0.433518	-0.466529	0.265071	0.12565
KCNN1	0.790483	0.375095	-0.268218	-0.154328	-0.125724	0.111437
KCNN2	-0.13661	0.741561	-1.50497	-0.529346	-1.6342	-0.461683
KCNN4	0.241611	-0.135414	-0.298322	-0.600194	-1.3772	-0.476221
KCNQ1	1.06233	0.825244	-0.293164	-0.561524	-0.627652	-0.0435359
KCNQ2	0.224021	0.240666	-0.269847	-0.257444	0.153345	0.928728
KCNQ3	-0.111881	0.525553	0.718606	0.924809	1.09256	1.21963
KCNQ4	0.657945	0.32487	1.16738	1.82498	1.30851	1.70159
KCNQ5	0.116493	0.337164	1.03713	1.78847	1.09383	2.48621
KCNS1	0.214204	-0.580443	-1.088	0.080045	-1.43611	-0.796893
KCNS2	0.373533	0.875216	0.532235	0.838324	1.13666	1.05807
KCNS3	0.335712	0.792537	0.254673	2.16323	0.68425	0.972525
KCNV1	0.165415	-0.659384	1.42114	0.778487	0.660148	-0.365449
KCNV2	0.611126	0.712498	-0.898341	-0.344014	-1.57766	-0.98996
KDM1A	-0.76416	-1.75816	-1.50801	-1.78161	-1.12261	-1.51923
KDM2A	-3.03639	-2.98235	-4.61512	-3.12661	-5.37668	-2.57564
KDM3A	-0.287642	0.0930974	1.81783	0.259073	0.49825	-0.210453
KDM4A	0.412729	0.506068	1.47157	1.80663	0.625618	0.103657
KDM4C	1.3477	0.909139	2.58044	1.72677	2.14802	2.68898
KDM4E	0.458716	1.28875	-1.93758	-2.35348	-1.87678	-2.54061
KDM5A	0.384424	0.808984	-0.0654598	0.32085	-0.0226396	-0.530895
KDM5B	0.636392	0.625497	-1.55885	-0.522623	-0.187077	0.377202
KDM5C	-0.19501	-0.250614	0.427253	0.0976293	0.64435	0.307369
KDM6A	1.055	1.1879	1.97587	1.57268	1.4227	0.755321
KDM6B	0.659135	0.425609	0.820304	0.454438	0.295921	0.727505
KDM7A	-0.774037	0.20879	1.02149	0.504715	1.13861	0.830365
KDR	-0.0108383	1.09587	2.27413	1.46168	-0.0939985	1.31475
KEAP1	-0.0567037	0.701634	-1.8403	-1.22002	-1.03225	-0.194155
KIF11	-1.99094	-1.50746	-1.41635	-0.430337	-0.21032	-0.925549
KIR2DL1	0.541892	1.40129	0.709585	0.77589	1.25938	0.116611
KIR2DL3	-0.325961	0.54485	-0.118381	0.197055	-0.388957	0.00235114
KIT	0.335703	0.310168	2.64002	2.24622	2.2651	2.34425
KLK1	1.13995	1.29581	-0.81418	-0.337288	-0.218872	0.240641
KLK14	0.488582	-0.0477867	1.19328	1.05139	1.02789	1.82972
KLK2	0.988661	0.813096	0.390131	0.0221453	0.928487	0.104599
KLK3	1.03095	0.591504	0.868197	0.506915	0.545735	0.214996
KLK4	0.56669	0.787164	-0.68933	-0.129998	-0.12899	-0.442208
KLK5	0.554594	0.41068	-1.33899	-0.467921	-1.98326	-1.1471
KLK6	0.178686	0.378639	1.78956	2.19689	1.91783	2.19394
KLK7	0.423072	0.445934	-0.809449	0.733198	0.824444	-0.226953
KLKB1	1.27242	0.351433	-0.209663	0.370494	0.383689	1.14432
KMO	0.203875	1.02406	1.11687	0.701329	1.51204	0.203645
KPNB1	-3.19868	-2.08418	-1.07081	-1.53896	-0.806061	-2.78883
KRAS	-0.225926	-0.807057	0.800906	0.591201	0.817543	0.404094
LAP3	0.388323	0.466119	-1.23595	-0.607182	-0.995672	-0.843142
LATS2	0.43177	0.926824	0.506431	0.211038	0.72434	0.220115
LCK	-0.517623	-0.926953	0.189146	0.467408	0.782332	1.07287
LGMN	0.19532	0.282599	-1.38061	-0.484795	-0.544695	0.0214876
LIMK1	0.636275	0.735627	0.964046	-0.15319	0.50583	-0.994789
LIMK2	0.0791063	0.249291	-0.87519	-0.792911	-0.356459	-0.1444
LINGO1	0.922345	0.239551	0.268013	-0.258733	-0.447759	-0.511157
LIPE	-0.0151395	-0.0438712	1.00023	0.59363	0.0673506	0.88036
LIPF	0.359602	0.458877	1.34432	1.22355	1.29765	1.19688
LIPG	-0.0255445	0.300618	-0.82718	-0.328071	-0.601928	-0.281075
LNPEP	1.47531	0.976539	1.29474	1.08906	1.39991	2.25929
LOXL2	-0.660506	0.346586	1.68609	2.39068	2.13131	2.3531
LPAR1	-0.125401	0.492355	2.12341	2.5709	1.96213	2.5361
LPAR2	-0.0672816	0.338362	-0.609535	-0.00852379	-0.809461	-0.761144
LPAR3	0.554968	0.234512	0.684176	0.0208074	0.0505159	0.260038
LPAR4	0.757255	0.141327	1.28885	0.152049	0.69838	0.823528
LPAR5	0.863501	0.573375	2.00196	2.20622	1.67648	2.24851
LRRK2	0.560712	-0.334461	-1.82243	-1.90513	-0.619573	-1.20877
LSS	0.442114	0.109206	1.34243	0.627921	1.56783	0.787309
LTA	0.571757	1.13676	1.60346	0.67511	0.682544	0.313431
LTA4H	-0.201291	-0.416159	0.783641	0.99789	0.504415	0.864665
LTB	0.189265	0.260108	-1.13266	-0.690376	-0.391332	-0.761332
LTB4R	0.0141213	-0.0825685	-1.63254	-0.0557707	-0.299262	0.326599
LTB4R2	-0.0903521	0.0695833	0.061748	-0.958438	-0.466554	-1.00459
LTC4S	0.127746	-0.0887829	0.445934	0.00524069	0.0501594	0.601807
LTK	0.997931	0.295221	-0.32213	0.363185	0.0407196	0.0957276
LVRN	0.805311	0.713362	0.676012	1.13844	1.0037	-0.197527
LY96	0.278804	0.508872	1.97839	2.39875	1.78666	1.63173
LYN	0.27068	0.488243	1.02517	1.4161	0.89813	1.67705
MADCAM1	0.267619	0.0812411	0.245896	-0.240329	-0.174986	-0.882412
MAG	0.296947	-0.576284	-0.120347	0.787655	0.378356	0.66019
MAOA	0.518985	0.817955	0.711492	-0.392704	0.3809	-0.255936
MAOB	0.626024	0.334949	1.22951	1.0159	1.00728	0.382391
MAP2K1	0.793192	0.362208	1.29927	1.05793	-0.334221	0.578021
MAP2K2	0.837932	0.268845	-0.250251	-0.443313	-0.540866	0.472013
MAP2K3	0.351635	0.639491	-1.74195	-0.152893	0.295345	-0.175862
MAP2K4	-0.611423	0.505554	0.392625	-0.208271	1.16194	1.14055
MAP2K5	0.0285497	-0.140974	0.852211	0.425899	-0.53043	-0.718948
MAP2K6	0.519148	-0.211575	0.523032	1.13529	1.8904	0.200353
MAP2K7	-2.22566	-1.75685	-2.09122	-2.84508	-2.17749	-1.20651
MAP3K1	0.272186	1.21425	-0.0114014	0.0518785	0.442909	-0.000884332
MAP3K10	0.370493	0.128758	0.530514	0.413459	0.534357	0.291754
MAP3K11	0.0988096	0.238469	-0.665856	-0.639442	-0.873589	-0.0475857
MAP3K12	0.554431	-0.215313	0.562541	0.654181	0.921148	1.43318
MAP3K13	-0.0271277	0.0420157	-1.04936	0.342918	0.206059	0.726734
MAP3K14	0.603701	0.504176	-0.828766	0.786471	0.281869	0.749296
MAP3K19	0.0184972	0.000648077	-0.917089	-0.65997	-1.04241	-0.281091
MAP3K2	-0.681779	0.664068	0.210881	0.89013	0.866335	0.222493
MAP3K3	0.296602	-0.0830357	-0.102392	0.751336	0.135525	0.801023
MAP3K5	0.897569	0.325408	0.777166	0.134605	0.172609	0.834208
MAP3K6	0.517046	0.226459	-0.0515406	1.22269	0.567592	0.00512054
MAP3K7	-1.85595	-0.309417	-1.5636	-1.6482	-1.22347	-1.37173
MAP3K8	0.554921	-0.0819144	-0.367806	-0.429213	0.261144	-0.399838
MAP3K9	0.649141	-0.134947	1.31567	1.48697	0.527699	1.02501
MAP4K2	-0.202062	0.454531	-0.280543	-0.594797	-0.041258	-0.621264
MAP4K3	-0.134228	0.435094	-0.103372	0.19756	0.325853	-0.0709378
MAP4K4	0.339464	-0.144595	1.51943	1.36773	1.95693	1.85421
MAP4K5	0.222297	-0.0502818	1.66484	0.995296	-0.420972	0.685597
MAPK1	0.197703	0.18209	-0.110141	-0.045156	-0.0402545	-0.0637799
MAPK10	0.232243	0.41603	1.1109	0.762834	-0.270132	1.18772
MAPK11	-0.416958	-0.337335	-0.0973049	0.152738	0.662764	0.390485
MAPK12	0.322904	-0.0180371	0.615972	0.378479	0.786741	0.548383
MAPK13	-0.147771	-0.0596501	0.938727	0.656341	-0.834652	-0.91526
MAPK14	1.52953	1.35779	0.283629	-0.210843	0.387778	0.0753097
MAPK15	0.175411	-0.0707939	-0.692135	-0.566681	-1.62657	-1.43689
MAPK3	0.297022	0.224803	0.741677	1.36276	1.47894	2.07686
MAPK7	0.311995	-0.84974	0.086681	0.630881	0.00974651	-0.403111
MAPK8	0.494373	0.516511	1.98068	0.89833	0.178227	0.611695
MAPK9	0.389197	0.248592	0.314195	-0.426452	-0.097722	0.252134
MAPKAP1	-0.0931542	-0.88205	-0.340187	-1.11385	0.0501773	-1.05192
MAPKAPK2	0.174846	-0.0889464	0.294244	0.187821	-0.437262	-0.139537
MAPKAPK3	0.576848	0.546766	-0.341947	-1.25186	0.324802	0.937113
MAPKAPK5	-0.93051	-0.102146	0.605934	-0.0887003	-0.791241	-0.077198
MARK1	0.460234	-0.151464	1.93942	1.46927	0.164421	1.38706
MARK3	-0.0341376	0.374214	1.78949	0.965228	1.33246	0.351262
MAS1	0.701797	0.725067	1.69591	1.15755	1.76797	1.35191
MAST3	-0.297496	0.216511	0.0620777	0.14163	0.369546	0.520215
MAT2A	-0.372896	-1.77634	0.934222	-1.32634	-0.8738	-0.351437
MBTPS1	-0.857142	-0.97001	-0.335454	-0.437687	0.247577	0.546301
MC1R	-0.346906	0.237397	-1.83625	-1.15126	-1.37871	-0.911064
MC2R	0.734885	0.604587	0.467387	0.772466	0.533576	1.58843
MC3R	0.812036	0.159729	1.49366	0.638472	0.337553	-0.313083
MC4R	0.763093	0.508381	0.993754	0.16811	0.575932	1.95271
MC5R	0.141383	0.0708916	-0.593086	-1.69408	-1.39878	-1.23151
MCHR1	0.356856	0.215145	-0.93862	-0.937776	0.516208	0.321331
MCHR2	0.598867	0.789897	-0.0609823	-0.463998	0.350762	0.484305
MCL1	0.223063	0.236269	0.304357	0.542063	0.697412	0.745959
MDM2	-0.969856	0.300919	0.466961	0.262451	0.635672	0.0386694
MELK	-0.139389	-0.51872	1.27162	2.10294	1.04617	2.30671
MERTK	0.432003	0.455396	1.41828	0.104477	0.467438	0.527154
MET	0.286129	0.939393	-0.687591	0.429433	-1.00003	-0.233464
METAP1	-0.86263	-0.552104	-1.36615	-1.74116	-1.23074	-1.76497
METAP1D	0.345321	-0.343385	-0.338715	-1.44413	-1.03875	-0.500689
METAP2	-1.72278	-1.8475	-0.000116983	0.0622966	-1.38622	-0.342041
MGA	-0.654972	0.275515	2.21571	2.23401	1.86498	3.61276
MGAM	0.205244	0.632996	0.924574	0.919744	-0.167039	0.0261647
MGLL	0.937359	0.136731	-1.01246	-1.07031	-2.13619	-0.816497
MINK1	0.0411404	0.465044	0.218598	0.0767921	-0.587208	-0.0676803
MIP	-0.345692	0.352372	-1.84958	0.1272	0.306659	-1.17513
MKNK1	0.545371	0.153147	-1.01417	-0.106184	-1.00109	-0.285219
MKNK2	-0.218781	0.53992	0.300322	0.464241	0.421135	0.735764
MLKL	0.287546	-0.0523563	1.81649	1.87432	1.69022	1.73391
MLNR	0.403828	0.904092	0.160151	-0.161218	-0.701376	0.466093
MLST8	-1.04038	-1.71006	-3.02271	-2.65136	-2.26455	-3.21529
MLYCD	0.836811	0.568609	-0.813491	-0.269145	-0.726076	-0.941133
MME	0.561997	0.229005	0.0132525	0.120123	-0.601239	0.748475
MMP1	1.00599	0.806391	1.0098	0.877244	0.665411	0.610625
MMP10	-0.261443	0.406638	2.12752	2.45011	1.74056	1.88067
MMP11	0.551325	0.645915	-1.12989	-0.622404	0.0364023	-0.601655
MMP12	1.63141	1.33522	0.937969	1.55216	1.73772	0.679555
MMP13	0.614489	-0.373593	0.339014	0.0723548	-1.06796	0.337371
MMP14	0.0380138	-0.152492	2.69169	1.90177	1.28113	2.72133
MMP15	-0.0645028	0.303468	-0.774022	-1.09425	-0.120506	-0.282002
MMP16	0.71471	1.03298	-0.36795	-1.28002	-1.33719	-1.1791
MMP17	0.481156	0.836926	-1.6358	-1.13812	-0.876029	-1.22167
MMP2	1.06544	0.710349	1.67806	1.76023	2.07968	1.94365
MMP25	0.915923	0.236449	1.20744	0.160275	-0.137743	0.599172
MMP26	0.302951	0.85099	-0.347706	0.374122	-0.102628	-0.109511
MMP3	0.790203	0.721259	-0.601374	-0.952972	0.189878	-1.40772
MMP7	0.562137	0.668366	0.439209	-0.23675	0.895342	0.402151
MMP8	0.521903	0.485276	1.22743	1.32642	1.9629	0.683319
MMP9	-0.304571	0.324749	0.308633	0.563013	0.737894	0.121083
MPI	0.512073	0.827207	0.960144	0.224568	0.987248	0.682246
MPO	-0.000965578	0.112694	-2.55166	-2.12281	-1.92894	-2.46476
MRPL34	-2.77977	-2.53309	-1.64212	-3.02621	-2.14584	-1.44859
MRPL45	-1.77037	-1.61145	-1.26029	-2.27829	-1.85109	-1.5816
MS4A1	0.698995	0.442803	2.68865	3.2567	1.97984	1.48249
MSLN	0.826607	0.790178	1.57215	0.318485	1.37668	0.226203
MST1R	0.122868	-0.108384	-0.347791	-0.526163	-0.123973	0.0329656
MSTN	-0.75482	0.52088	-1.41308	-0.526267	-0.300681	-2.07702
MTNR1A	0.854231	0.199571	-0.780652	-0.0624601	0.251009	0.0348397
MTNR1B	0.443632	0.257905	-0.139061	0.11546	0.424443	-0.170564
MTOR	-2.57522	-2.67069	-2.32403	-2.98309	-3.6225	-4.26064
MTTP	0.597863	0.9129	0.1123	-0.292997	0.420402	-0.0628969
MUSK	1.23289	0.625029	1.75697	0.0571636	0.786061	0.322328
MVK	-1.18242	-0.805562	-1.55585	-1.51249	-1.82121	-1.25431
MYLK	0.291817	-0.211575	1.41425	1.29007	2.19802	1.60496
MYLK2	-1.16887	-1.3964	-0.0505777	0.556469	0.0565566	0.315754
NAAA	0.219379	0.838187	0.27351	1.17428	0.516843	0.836322
NAE1	-0.603904	-0.676392	0.351826	0.274591	0.845742	-0.749706
NAMPT	0.464297	1.77418	-0.00378835	-0.557113	-0.375607	-0.144139
NARS1	-1.99224	-2.92487	-0.661973	-0.973537	-0.646437	-1.98945
NAT1	0.676438	1.36905	-0.714164	-0.692333	0.389256	-0.153977
NCOA1	-0.0819692	-0.72585	0.607112	1.18648	1.8089	1.33538
NCSTN	-0.666157	-0.0373274	-1.10584	-1.67978	-1.41313	-0.577317
NDC80	-1.89057	-1.68511	-0.0361917	-0.0652908	-1.24157	-1.02585
NDUFA1	-3.15221	-2.64546	-2.51701	-3.06995	-2.62966	-1.58259
NDUFA10	-1.24047	-0.905646	-2.12817	-2.363	-1.46554	-3.16804
NDUFA11	-1.4166	-2.14427	-0.855864	-0.997648	-1.57721	-2.65916
NDUFA12	-0.151367	0.0375839	0.312817	-0.141591	-0.00868843	0.422636
NDUFA13	-2.08359	-1.61607	-1.597	-2.34224	-1.41315	-1.61997
NDUFA2	-2.83534	-1.40067	-2.54936	-2.19656	-2.75149	-2.78482
NDUFA3	0.535517	0.00348193	0.722617	1.402	1.44966	1.41182
NDUFA4	-0.120358	0.530739	1.44031	2.05048	1.56079	1.42396
NDUFA4L2	0.566713	0.0899085	-1.34953	-0.809147	-1.2529	-0.634972
NDUFA5	-0.614272	-0.672444	0.907251	1.17234	0.950234	0.38129
NDUFA6	-2.8601	-3.52202	-2.47317	-1.48457	-1.40547	-1.42997
NDUFA7	0.633356	0.217098	0.235631	-1.30855	0.372217	-0.437319
NDUFA8	-0.836734	-1.64315	0.820199	1.09692	1.0163	2.03533
NDUFA9	-1.77592	-1.23886	-2.79028	-2.75356	-1.75466	-2.30041
NDUFAB1	-3.30796	-2.39502	-2.05375	-3.21248	-2.16509	-2.61864
NDUFAF1	-0.601382	-2.32703	-1.22855	-1.32416	-0.595871	-2.18908
NDUFAF2	0.230066	-0.478186	-0.332189	0.657065	0.0151068	0.736615
NDUFAF3	-2.56191	-2.9723	0.0577059	-0.402199	-0.472336	-1.26165
NDUFAF4	-3.02519	-1.70681	-3.25782	-3.98281	-3.77502	-4.3332
NDUFB1	0.414215	0.0680764	-1.10854	-0.40597	-0.29746	0.109227
NDUFB10	-2.31509	-3.82923	-2.48211	-2.63678	-1.31408	-1.54173
NDUFB11	-3.41374	-2.54991	-1.80961	-0.0406824	0.419261	-0.468431
NDUFB2	-1.84812	-1.59668	-1.89281	-0.889135	-0.276391	-1.99179
NDUFB3	-0.767616	-0.64018	1.24384	1.12579	0.469405	-0.713931
NDUFB4	-2.34731	-0.821425	-1.65365	-1.78921	-2.00855	-1.90074
NDUFB5	-0.546952	-0.943727	-0.672312	-0.335674	-0.0754494	0.0799726
NDUFB6	-2.13048	-1.84537	-1.1757	-1.34811	-0.71978	-1.10713
NDUFB7	-2.11528	-1.76919	-2.96027	-3.55445	-2.06374	-3.04278
NDUFB8	-1.92373	-3.57598	-0.0746818	-0.67135	0.282261	-0.588655
NDUFB9	-0.542328	-2.24503	-0.47752	-1.51204	-0.114645	-0.894632
NDUFC1	-1.48546	-1.01902	-2.58158	-0.769942	-0.791149	-0.994078
NDUFC2	-2.90026	-2.30087	-0.815899	-0.921998	-0.431747	-0.562986
NDUFS1	-1.47615	-1.76466	0.493094	-0.489301	0.897467	0.641844
NDUFS2	-2.62122	-2.72559	-1.30983	-1.77256	-2.99809	-2.00745
NDUFS3	-1.24624	-1.32519	-1.5617	0.151284	-1.85797	-2.36287
NDUFS4	1.06714	0.603139	0.511073	-0.291901	-0.0226562	0.0617619
NDUFS5	-1.73037	-2.834	-0.642497	0.222809	-1.6512	-0.328707
NDUFS6	0.0921173	0.634678	0.452859	0.144908	0.700913	0.561536
NDUFS7	0.119452	0.168484	0.479233	-0.412728	1.31376	0.798041
NDUFS8	-1.94139	-1.85575	-1.90134	-0.368885	-0.860175	-2.26759
NDUFV1	-3.94263	-2.66555	-1.81965	-1.28683	-0.977503	-2.4122
NDUFV2	-0.322108	-0.249469	1.4183	-0.450639	0.23257	0.00300037
NDUFV3	0.377724	0.693808	0.373759	0.20037	-0.129932	0.977485
NEK1	-0.270619	0.478688	-1.4779	-2.13189	-1.28821	-1.82949
NEK11	0.350619	0.680445	-0.142991	-1.00486	0.179507	-0.0868669
NEK2	-1.55318	-0.93527	-1.85008	-2.4299	-1.07049	-0.795868
NEK3	0.806292	1.12748	-0.204425	-0.592231	-0.789904	-0.665593
NEK6	0.298827	1.07352	1.34521	0.376569	-0.167775	0.687082
NEK7	0.304887	0.801111	1.36489	2.07643	0.592164	1.28297
NFKB2	0.0451077	-0.270705	1.08541	1.36722	0.128228	1.0444
NGF	0.234874	0.971259	-1.19143	-0.61575	-0.906948	-0.693484
NGFR	0.367212	-0.109529	-1.02839	-0.654066	0.47584	-0.182096
NLK	0.0564258	-0.130041	-1.96116	-1.92062	-1.85953	-1.52535
NLRP3	1.13341	0.635636	-0.147048	0.0393503	-0.332068	-0.194575
NMBR	0.0481083	0.103356	0.0784027	-0.733003	0.477496	-0.0187841
NMUR2	0.459137	0.951985	0.795413	1.15617	1.26573	1.6698
NOD1	0.326755	0.507423	1.34314	0.367595	0.790702	1.53253
NOD2	0.749082	0.573142	-0.90418	-0.791704	-0.557724	-0.754719
NOL9	-1.48775	-0.342334	-1.46236	-1.65148	-1.88328	-1.31033
NOS1	0.237928	0.575501	-0.147608	0.81582	1.14055	0.574482
NOS2	0.36777	-0.307688	-0.489606	0.525535	0.347091	0.172452
NOTCH1	0.349503	0.788823	2.13373	1.22942	1.49402	1.95223
NOTCH2	0.133074	-0.0437543	0.447711	1.85594	1.34019	0.945204
NOTCH3	0.424473	0.545691	-0.399195	0.580231	0.945608	0.404498
NOTCH4	0.426142	0.327576	-0.265075	-0.864051	-0.432527	-0.265317
NPC1L1	-0.0328953	-0.342685	0.126715	0.0923319	-0.558371	-0.607381
NPEPL1	-0.0552326	0.451377	1.03808	0.500755	1.24149	0.683714
NPEPPS	-0.475942	0.0897566	-0.817684	0.0723547	-0.647568	0.853365
NPFFR1	0.0580557	-0.0834095	0.446633	0.412114	1.09627	0.786621
NPR2	0.275759	-0.0205018	0.925012	2.59164	2.15453	2.06689
NPR3	0.889163	1.20612	-0.820564	-0.4959	-0.252023	-0.281791
NPY1R	-0.344898	1.01971	0.913	0.889549	1.72187	0.796831
NPY2R	1.50207	0.992449	-0.663357	-1.59003	-1.02266	-0.999446
NPY5R	0.72795	-0.312243	-0.375789	0.443389	-0.596133	0.241012
NR1D1	0.262774	0.284054	0.792464	0.20422	-0.419279	-0.363124
NR1D2	0.224644	0.231395	0.151157	0.455381	0.930797	0.358395
NR1H2	0.516229	0.715114	1.23797	1.76756	1.7654	0.722258
NR1H3	0.528722	0.502728	0.652407	1.01969	0.376041	0.196942
NR1H4	-0.988187	-0.711015	1.12769	0.486805	-0.0577184	0.520936
NR1I3	0.822357	0.538122	0.301333	1.26301	1.4349	-0.311728
NR2E3	0.465021	-0.186297	-0.0529934	-0.0367028	-0.339287	0.356116
NR3C1	0.474408	0.16022	1.37523	1.31211	2.15083	2.07427
NR3C2	1.04412	0.475838	0.290198	0.898222	0.361271	0.633608
NRAS	0.578716	0.910026	-1.62427	-2.22728	-3.89064	-2.1884
NRF1	-0.523951	-1.88901	-1.86281	-1.98677	-0.385801	-0.621993
NRP1	1.59041	1.16605	-1.10633	-0.201997	-0.0388734	-0.35987
NT5E	0.771989	1.13755	1.15391	0.368507	1.12694	1.55423
NTRK1	0.295381	0.412269	-1.53377	-0.790589	-0.802965	-0.483902
NTRK2	0.895655	0.486701	0.132354	0.493911	2.15513	1.37331
NTRK3	0.658809	0.417292	-0.0128386	-0.138936	0.568657	0.0308075
NTSR1	0.708639	0.468105	2.19927	2.51724	2.14893	2.09465
NUAK1	0.893857	0.777772	0.0778837	0.0696458	1.29643	0.703325
NUCB1	1.00015	0.0989147	-0.108185	-0.767506	-0.919718	-0.56543
NUP85	-3.22974	-2.60084	-1.26919	-0.501301	-2.58223	-2.4781
ODC1	0.238143	0.106585	-0.680845	-0.417793	-0.783728	-0.359186
OPRD1	0.621984	1.12849	-0.375143	-0.616675	1.21543	-0.0830878
OPRK1	1.02626	1.12085	-0.26417	-0.299754	-0.582282	-1.05013
OPRL1	0.326351	0.295235	-1.07075	0.652387	-0.335611	-0.441929
OPRM1	0.247087	0.0899459	0.0486171	0.0686083	2.11801	1.2204
ORAI1	0.630344	0.516068	1.52263	2.23205	2.0751	1.86336
OSGIN2	-0.0102802	0.272959	-1.99156	0.323022	-0.786592	-1.41274
OXER1	0.120299	-0.426111	-0.270175	-0.582157	-1.3021	-0.68113
OXSR1	0.408543	0.0653874	-0.801376	-1.33619	-0.822233	-0.946121
OXTR	0.441203	-0.385017	0.159717	0.0131321	-0.349908	-0.610694
P2RX1	-0.0597159	0.365004	0.426446	1.01768	0.895582	0.633508
P2RX2	-0.239283	0.0281829	1.0432	0.786151	0.674374	0.850946
P2RX3	0.307663	0.297632	0.298476	0.471254	-1.08065	-0.954209
P2RX7	0.596042	-0.235662	-0.225981	-0.0794788	0.255491	-0.440174
P2RY1	0.815235	0.548635	0.529535	-0.26424	-0.977372	0.0744747
P2RY10	1.02133	1.02745	0.805324	0.840198	1.53416	1.7728
P2RY11	0.193454	0.217165	0.912805	-0.122905	-0.382885	0.138731
P2RY12	1.06462	0.881781	0.348383	1.07178	1.47362	0.321598
P2RY13	0.488956	1.14914	-0.489736	-0.890362	0.291334	-0.105779
P2RY14	0.680408	0.963479	0.350776	0.228956	0.0751309	-0.100517
P2RY2	-0.355873	0.438131	0.105678	0.459984	-0.445628	0.340906
P2RY4	-0.677249	0.415633	-0.214568	-0.428609	-0.901589	0.203394
P2RY6	0.239299	0.188174	-0.799311	-0.558174	-1.40178	-0.494317
P4HB	-0.0878068	-0.106585	0.544554	-1.33345	0.399921	0.39765
P4HTM	0.340095	-0.327242	0.0667383	0.710755	-0.195942	-0.205182
PADI1	0.731616	0.411124	0.335109	-0.756668	-0.0420964	0.411343
PADI3	1.28722	0.935304	0.838208	0.301508	0.053077	0.19264
PADI4	0.618202	0.338035	0.491566	0.646441	0.766938	0.0640131
PAH	0.461635	0.216509	1.35472	0.839073	0.982968	0.832406
PAK1	0.297751	0.679464	-0.870307	-0.712297	-0.71006	-0.250128
PAK2	-0.193842	0.376104	-0.77011	-0.899695	-1.58102	-1.27234
PAK3	-0.102915	0.146957	-0.0726304	0.858184	0.519256	0.116142
PAK4	0.36826	0.0362242	1.9896	1.17688	1.00882	1.6121
PAK6	0.199121	0.183808	-0.512856	-0.883795	-0.463879	-0.56841
PANX1	0.211729	0.162489	1.32173	0.160144	1.26514	1.63243
PANX3	0.231227	0.636313	0.205912	0.468958	0.0510443	-0.322173
PARP1	-1.94451	-1.4852	-0.573852	1.21412	-1.6274	0.194039
PARP2	-0.23968	0.171659	0.159674	1.4079	0.327314	0.770735
PARP3	0.939577	0.683645	0.28649	0.209859	-0.0566931	0.192456
PASK	0.350383	-0.271827	-0.410915	-0.567846	-1.25332	-1.43844
PBK	0.469271	0.918647	0.881022	1.62703	1.60669	-0.0628804
PBRM1	-0.468984	-1.0389	-1.24169	-1.02557	-0.871322	-0.36085
PCSK1	1.03312	0.612928	-1.38074	-1.46821	-2.0356	-2.0232
PCSK2	0.557513	0.710489	-0.311644	-0.530043	-1.13015	-0.619152
PCSK4	0.317961	0.638042	-0.19714	0.614024	-0.164864	-0.209417
PCSK5	0.175843	0.151251	2.12604	1.31318	1.72996	1.24408
PCSK6	0.793822	0.620357	1.2537	0.100322	0.226807	0.836687
PCSK7	-0.264969	0.388614	0.931786	0.184678	-0.0171643	-0.883958
PCSK9	-0.153889	0.401613	-1.00652	-0.731197	-0.792475	-1.33421
PDCD1	0.889303	-0.170247	-0.30798	0.553108	-0.00134359	0.928058
PDE10A	0.228502	1.22434	-1.0895	-0.427196	-1.05654	-1.92072
PDE11A	-1.05796	-0.817944	-1.30179	-0.546779	-0.215837	-0.304422
PDE1A	0.0814367	-0.104436	1.18967	1.46105	1.40448	1.6804
PDE1B	0.286197	0.170285	1.38673	0.618463	1.58398	2.0608
PDE1C	-0.182751	0.49086	1.28575	0.635068	0.499335	1.52075
PDE2A	0.0334604	0.031491	-0.563132	0.777574	-0.93137	-0.611221
PDE3A	0.143834	0.347331	0.0439614	-0.658504	0.0322852	-1.51604
PDE3B	1.27977	0.787958	-0.608788	-1.41446	-0.499083	-0.609688
PDE4A	-0.838929	-0.113827	0.157199	-0.402961	-0.329125	0.71298
PDE4B	0.30049	0.477894	1.83341	1.32297	0.164207	1.17464
PDE4C	0.216191	0.394749	-0.198223	-0.317676	-0.314833	0.0582159
PDE4D	1.10948	0.853209	-1.43254	-0.863037	-0.194938	-1.14379
PDE5A	0.0375864	0.446354	-2.20334	-1.88792	-1.0587	-1.40881
PDE6A	0.147346	-0.216668	0.899202	0.535224	0.492469	1.42924
PDE6B	1.29834	1.53686	0.57275	0.533801	0.766079	1.36555
PDE6C	0.801271	1.75046	0.133957	0.212235	-0.0723438	-0.0493317
PDE6D	0.731429	0.555854	1.10376	0.65583	0.883939	-0.674226
PDE6G	-0.361617	-0.0749991	2.06575	0.620994	0.691999	0.965838
PDE6H	0.711604	0.826506	0.147882	0.399947	0.566541	1.12439
PDE7A	1.06191	0.140483	0.96478	1.17735	0.342846	0.0512724
PDE7B	1.29166	0.567465	-0.807907	-0.304085	-1.30041	-0.78365
PDE8A	-0.674844	0.943177	-1.04466	-1.08874	-0.667306	-0.458644
PDE8B	-0.0259812	1.18902	0.658534	-0.0906743	1.58909	0.205058
PDE9A	0.0120735	0.129087	0.99861	1.44672	0.693327	0.398575
PDGFA	0.275915	0.864727	0.19608	0.534589	-0.2623	0.0788982
PDGFB	0.948404	0.783566	0.141818	0.0439542	0.409716	0.163622
PDGFC	0.396179	0.710325	1.73082	0.162269	-0.192858	0.688382
PDGFD	0.989992	1.19514	1.55723	0.970601	1.57338	1.84661
PDGFRA	-0.115431	-0.0763541	-0.436872	-0.132417	0.335963	0.728
PDGFRB	0.540537	0.106458	-0.692818	-1.42675	-0.728898	-0.895762
PDK1	-0.421278	-0.538017	0.376389	-0.0949762	-0.459041	0.983452
PDK2	-0.223965	0.209145	0.752464	0.405921	0.487099	-0.289638
PDK3	0.410366	0.657339	2.18992	1.96188	1.80713	1.29084
PDK4	1.03536	0.845616	0.991184	0.882341	0.978796	0.719964
PDPK1	-1.15867	-1.77652	-0.976814	-1.71824	-2.21765	-1.27081
PDRG1	-1.01518	-0.742647	-0.597507	-0.472641	-2.04019	-0.966485
PFKFB3	0.838305	0.613512	1.54479	1.93168	1.53567	1.54656
PGA5	-0.531353	-0.74767	-0.369495	0.739664	-0.0150971	-0.141321
PGC	0.445803	-0.093175	0.343541	-0.467563	1.11787	0.253907
PGF	0.604915	-0.245567	1.12277	0.479789	0.560363	-0.0393038
PGR	0.609515	0.00102888	0.433935	0.380835	0.136099	-0.722798
PHF8	-0.127807	-0.201343	0.596383	0.502329	1.32969	0.817968
PHKG1	0.287752	0.599962	0.686952	0.888242	-0.00885627	0.285402
PHKG2	0.296508	-0.902562	1.91426	1.33946	1.69213	1.41547
PI4K2A	-0.0147962	0.0878292	-0.528544	-0.348386	-0.058809	-0.742816
PI4K2B	0.123779	0.280134	-0.258349	0.500364	0.544095	-0.31024
PI4KA	-0.605445	-0.822476	-0.812785	-1.80921	-2.33304	-2.3342
PI4KB	-0.77726	-1.54211	-0.569024	-0.669722	-0.811189	0.021093
PIK3C2A	0.0448719	0.292602	-0.0290343	0.405017	0.901097	0.749321
PIK3C2B	0.0271767	0.114916	0.253888	-0.0697855	0.382289	-0.502905
PIK3C2G	-0.388167	0.0971134	3.46092	1.76836	1.43921	2.39084
PIK3C3	-1.18914	-1.92149	-1.56346	-1.91356	-1.89622	-3.40172
PIK3CA	-1.06854	-0.979214	-0.639104	-0.982698	-0.463245	-0.0235942
PIK3CB	0.730519	1.30345	0.979678	0.687331	-1.07088	-0.280626
PIK3CD	0.413288	-0.414547	0.650003	-0.832098	0.09761	0.0169902
PIK3CG	0.216177	-0.380648	0.404216	1.47549	0.78389	0.706866
PIK3R1	0.887739	2.09863	-1.64388	-1.94458	-0.992317	-1.56878
PIK3R2	0.120972	-0.300399	-0.319703	-0.283044	-0.425151	-0.661366
PIK3R3	0.988217	1.13129	1.87792	1.35757	2.45064	2.14211
PIK3R4	-0.119214	-0.495918	-1.72403	-0.874278	-0.202244	-1.33402
PIK3R5	-0.382983	-1.24597	0.774202	1.18947	0.693343	0.639238
PIK3R6	0.184369	0.0617265	-0.156418	0.596534	-0.929186	1.14827
PIM1	-0.250515	0.290708	0.938814	0.871002	0.985274	0.500016
PIM2	-0.341419	-0.159804	-0.482496	0.338829	-0.403935	-1.11462
PIM3	-0.00542556	-0.411136	3.18712	1.98441	1.67062	1.8978
PIP5K1A	0.776916	0.368752	0.880975	0.777698	1.83712	1.46728
PKMYT1	-1.27185	-2.52608	-4.14895	-4.46491	-3.59263	-4.46392
PKN1	0.115774	-0.0371311	0.46506	0.517237	0.613998	0.636957
PKN2	0.201634	-0.321775	1.07177	1.53644	-1.25081	-0.533021
PKN3	0.364788	0.189107	0.172503	0.0572543	-0.040582	0.658202
PLA2G10	-0.943143	-1.6439	-2.23767	-1.8597	-2.2152	-2.80207
PLA2G1B	0.741844	0.600312	1.79021	0.891554	1.42239	1.36943
PLA2G2A	0.681786	0.526861	-0.564065	-0.43357	-1.79807	-0.443625
PLA2G2E	0.626958	-0.0496627	0.642812	0.450387	0.460903	0.215036
PLA2G4A	-0.130912	-0.0858626	-0.18828	-0.266396	0.430669	0.521893
PLA2G5	1.11025	1.85587	-0.499832	-0.251127	-0.718563	-0.352135
PLA2G7	0.327959	1.01618	0.556044	0.798676	1.99404	1.09604
PLAT	0.555879	0.65248	-0.24832	-0.821852	0.694257	-0.71224
PLAU	0.448115	0.257722	-0.594714	-1.94561	-0.641331	-0.718996
PLCG2	0.114116	0.147564	0.480572	0.110675	-0.215329	0.740101
PLD1	0.363548	-0.136465	0.943517	-0.256378	1.19099	0.584849
PLD2	0.302035	0.231173	0.034316	-0.28118	0.390044	-0.194978
PLG	0.133908	0.0948099	3.78431	3.16485	2.7331	3.21353
PLK1	-1.48294	-1.0792	-3.98488	-1.75465	-1.06047	-3.51926
PLK2	0.873915	1.63505	0.956807	0.862731	0.72567	0.657507
PLK3	0.687413	0.567628	0.0365822	-0.413744	0.189516	0.494538
PLK4	-1.73277	-2.34385	-1.98587	-2.1648	-2.26357	-0.397988
PMPCA	-2.20371	-2.17004	-1.80989	-1.25671	-1.24091	-1.97387
PMVK	-1.63222	-1.08755	-0.246362	0.419649	-0.986205	2.20393
PNLIP	0.411534	0.919091	0.165726	-0.0553862	0.833869	0.601406
PNMT	1.1799	0.0477652	-0.280611	0.207712	-0.1595	-0.187385
PNP	0.40561	0.266357	2.42281	2.43427	1.99297	1.78494
POLA1	-1.58865	-1.03535	0.428151	-0.718884	-1.20849	-1.1402
POLD1	-0.830593	-1.70078	-0.227725	-0.546171	0.522793	0.461112
POLE	-3.11929	-3.08187	-2.94934	-1.5274	-0.952989	-1.78852
POLR1B	-2.29641	-2.45226	-0.774441	-1.85268	-0.603818	-0.441903
POLR2C	-1.83937	-2.44945	-1.79181	-2.53623	-2.99761	-1.92646
POLR2L	-4.26114	-4.75485	-2.08824	-3.42716	-4.06955	-3.43676
POLR3A	-3.47609	-2.51089	-3.31891	-1.31743	-1.81177	-3.2196
POLR3H	-2.97545	-3.78484	-4.056	-3.26279	-4.69058	-4.18701
POLR3K	-3.24562	-3.24424	-2.40282	-2.72108	-4.43332	-2.74241
PPARA	0.531454	0.879702	2.09847	2.01822	1.38937	1.61577
PPARD	1.07034	0.225604	2.10215	1.25334	1.04452	2.04246
PPARG	0.426306	0.551251	0.169359	0.74618	0.631651	0.888772
PPAT	-0.665153	-0.850885	-0.910271	-1.81889	0.0367058	-0.852259
PPIA	-0.968198	0.323959	0.104898	-0.464362	-0.122295	-0.274019
PPME1	-0.908351	-1.01405	-0.860847	-0.954107	-0.362742	0.458236
PPWD1	-1.46139	-1.11413	-2.53408	-1.04562	-2.51559	-2.02123
PRCP	0.503176	0.542444	0.509563	0.730335	0.384105	0.369542
PREP	0.106994	0.74934	2.81992	2.61869	3.35064	2.94241
PRKACA	-0.0712512	0.0810098	2.0516	0.762895	2.29143	-0.0321042
PRKACB	0.400456	1.11601	0.553506	0.786303	0.0469546	-0.628333
PRKACG	0.507706	0.744317	0.0841876	0.0752369	0.224766	-0.226428
PRKAR2B	0.64711	0.690304	1.19256	0.86556	0.250159	-0.337384
PRKCA	0.370406	0.995065	0.203688	1.71554	-0.248099	2.54446
PRKCB	0.0740462	0.704508	-0.344798	-0.647609	-1.028	-0.523853
PRKCD	0.474385	0.624772	-0.158525	0.235531	-0.813274	-0.214835
PRKCE	0.160002	0.185824	-1.77115	-1.16648	-2.49323	-1.10969
PRKCG	0.877791	0.618184	0.184853	0.537131	-0.347667	0.267795
PRKCH	0.80008	-0.134737	0.558627	1.80709	1.23729	0.983551
PRKCI	0.333328	0.778543	-2.20946	-1.69047	-0.911255	-1.85868
PRKCQ	0.972852	0.344593	0.444523	1.18557	1.06265	0.901852
PRKCZ	0.0628239	0.697476	0.992069	1.65896	-0.0399293	-0.00980454
PRKD1	-1.09969	-0.970944	-1.59493	-1.97343	-2.49469	-3.19333
PRKD2	0.0907443	0.605802	-0.797053	-1.67003	-1.23512	-1.72758
PRKD3	0.251582	0.86204	0.345406	0.601528	-0.114462	0.0595809
PRKDC	-1.80114	-0.62385	-1.57679	0.088054	-0.853387	-0.170153
PRKG1	0.821586	0.507984	-0.665959	-0.254337	-0.278755	-0.489286
PRKG2	0.448559	0.602905	-0.154366	-0.473047	1.22049	0.818244
PRKX	0.975608	0.336367	1.58356	1.31085	1.33605	1.58511
PRLHR	1.12937	1.49233	1.38172	0.648007	0.679276	1.03836
PRMT1	-1.97737	-1.42151	-4.05418	-4.25615	-3.76661	-3.53859
PRMT3	0.210133	-0.222485	1.62349	1.51867	2.09722	1.0781
PRMT5	-2.99646	-3.58112	1.26722	-2.61504	0.469676	-0.976796
PRMT6	0.337816	0.529921	-2.33344	-1.34539	-1.16159	-2.04795
PRMT7	0.704506	0.728548	-1.7653	-0.680729	-1.31464	-1.06843
PRMT8	0.994475	0.769292	0.829967	1.05581	1.27511	1.24116
PROC	-0.328786	-0.158706	-0.518866	-1.51878	-1.81632	-2.49573
PROKR1	0.770472	1.11132	1.21114	1.128	0.305972	-0.0415581
PROKR2	0.229791	0.237234	0.29681	-0.848789	-0.771847	-0.525326
PRPF6	-1.37756	-2.3789	-3.18977	-1.64447	-1.07522	-2.55757
PRRT2	-0.385155	0.601293	0.304495	-0.781482	0.134404	-0.343285
PRSS1	0.548617	0.697523	1.1474	1.58329	1.36108	1.52847
PRSS3	0.611523	0.0840212	-1.23947	-1.20222	-0.902379	0.016073
PRSS8	0.699135	0.688458	-0.0331115	0.313036	0.10299	-0.742348
PRTN3	0.150809	0.300536	0.297717	0.190413	0.728895	0.301279
PSEN1	-0.0836738	0.120305	-0.709221	-0.493199	-0.481941	-0.431003
PSEN2	-0.74179	-0.060421	-1.38024	0.0904849	-0.252993	-0.329278
PSENEN	-0.647617	-0.0735039	1.19291	1.29356	1.91659	0.976047
PSMA1	-2.56424	-1.8107	-1.71935	-1.55993	-1.91547	-2.03993
PSMA2	-1.52114	-1.65845	-0.21573	-0.276508	-0.771313	-1.85009
PSMA3	-0.36087	-1.22678	-3.19821	-3.10774	-3.49696	-3.40651
PSMA4	-2.23079	-1.72176	0.288872	0.56125	-0.347144	0.340555
PSMA5	-3.25752	-2.21443	-2.22472	-2.34283	-1.02639	-0.654737
PSMA6	-4.28846	-3.27321	-2.0963	-4.82165	-4.946	-2.59508
PSMA7	-1.73242	-2.24456	-2.25751	-1.53981	-2.68923	-2.97814
PSMA8	0.460678	0.766138	0.127208	0.392487	-1.10583	-0.175864
PSMB1	-0.994491	-0.0162803	1.12968	1.05819	1.34931	1.91046
PSMB10	0.0469828	0.602134	-0.906415	-0.340717	0.158407	-0.461251
PSMB11	0.788732	0.179483	1.32482	1.14412	0.398885	1.33402
PSMB2	-1.72189	-2.95875	0.0196414	0.449176	0.19808	1.22451
PSMB3	-3.141	-2.5651	-2.71672	-1.96732	-0.722397	-1.47653
PSMB4	-4.95372	-3.42646	-1.50982	-3.62157	-2.59785	-3.51551
PSMB5	-2.98876	-2.27634	-3.7979	-2.52559	-2.32592	-2.21659
PSMB6	-0.784919	-1.23697	0.926867	1.0033	1.0729	0.242527
PSMB7	-2.95653	-3.07066	-0.721634	-1.77654	-0.647662	-1.97324
PSMB8	0.364237	0.387972	0.773508	0.927373	0.729158	0.160084
PSMB9	0.778644	0.482449	-2.43407	-1.16294	-1.6665	-1.24075
PSMC1	-1.0231	-0.991503	-1.70286	-3.13406	-2.95964	-3.3361
PSMC2	-1.61422	-1.66247	-1.35309	-0.515751	-1.48379	-1.12774
PSMC3	-2.36716	-1.85271	-1.7633	-0.305411	-1.8332	0.750141
PSMC3IP	-0.686869	-0.237998	-2.35189	-1.63015	-1.46006	-1.87472
PSMC4	-1.13924	-2.17775	-1.90394	-2.84959	-0.992964	-1.99386
PSMC5	-1.54328	-0.667795	-2.79629	-3.31888	-2.3273	-3.37916
PSMC6	-0.629403	-1.17373	-1.62373	-1.58986	-0.734406	-1.51305
PSMD1	-1.3249	-1.00538	-0.490769	-1.38622	-1.47694	-1.44609
PSMD10	-0.441547	-0.232625	-0.786989	-1.19712	-0.595562	-0.656628
PSMD11	-3.77101	-2.39385	-2.81969	-2.65238	-2.54247	-1.51796
PSMD12	-1.08976	-2.22237	-2.34312	-2.60935	-2.72275	-1.94037
PSMD13	-0.132337	-0.457137	-1.18825	-1.7107	-0.753046	-0.361488
PSMD14	-2.78094	-1.98115	-2.5714	-3.30209	-1.70196	-4.13451
PSMD2	-0.614809	-1.18854	-0.0480141	-0.245673	-1.51295	-0.466776
PSMD3	-2.27212	-2.2476	-1.96733	-2.11981	-2.40862	-2.48244
PSMD4	-2.00044	-1.97559	-0.883771	-1.23659	-1.28798	-0.0794822
PSMD5	0.430018	0.299763	0.0275682	-0.556188	-0.394387	-0.523019
PSMD6	-1.99096	-2.7819	-2.91237	-2.72358	-3.22026	-2.05017
PSMD7	-1.68331	-1.29033	-1.67036	-0.486965	-3.72337	-2.89053
PSMD8	-1.62909	-1.25575	-1.42183	-1.36391	-1.32926	-1.38703
PSMD9	0.0833818	-0.0377876	0.326781	0.457108	0.791784	1.29932
PSME1	0.249562	-0.065771	0.582317	1.24789	0.458087	2.03347
PSME2	0.0928856	-0.180176	0.0571241	-1.05888	-0.135761	-0.687617
PSME3	-0.586391	-0.166953	-1.23514	-0.567023	-1.16344	-1.76972
PSME4	-0.242552	-0.935503	1.45062	-0.349994	-0.642295	0.996284
PSMF1	0.527461	0.254879	-0.439265	0.240163	0.389672	0.611353
PTAFR	0.802112	0.288051	-0.895425	0.682583	0.366371	-0.359226
PTCH1	0.116344	-0.081634	1.11854	1.45221	1.4551	1.32725
PTEN	0.438471	0.768591	-0.557672	-1.12233	-0.558429	-1.41551
PTGDR	0.902053	0.851807	0.317156	1.19228	0.812905	1.15156
PTGDR2	0.0673446	-0.295633	-0.733626	-0.101578	-0.528796	-1.39041
PTGER1	-0.130702	-0.211972	-1.74626	-0.619524	-1.87943	-0.305251
PTGER2	0.899718	0.46939	0.7493	0.98571	0.470063	0.98071
PTGER3	0.545091	0.87267	-0.755649	0.0448655	-0.204401	-0.979339
PTGER4	0.43233	-0.13775	-0.499979	-0.333185	-0.102948	-0.659089
PTGFR	0.756555	0.679277	0.625081	0.419667	2.26053	1.20868
PTGIR	0.439452	1.06735	0.345987	-0.591327	-0.0476668	0.194108
PTGIS	0.223633	0.431473	0.807427	0.649265	0.427188	0.384314
PTGS1	0.704693	-0.0600472	-0.16609	-0.355784	0.536354	-0.43325
PTGS2	0.0940251	0.590056	0.914673	0.728114	1.37033	3.48635
PTH2R	0.430672	0.184028	1.66282	0.633234	1.32959	0.889259
PTHLH	0.861002	0.430328	1.78253	0.977928	1.07654	1.36832
PTK2	-0.0919633	-0.0518471	-1.16466	-1.21584	-1.14711	-0.764336
PTK2B	0.201332	0.244044	-0.413315	0.477316	0.978861	-0.346383
PTK6	0.25731	0.0782343	-0.298062	-0.442593	-0.820259	0.284097
PTPMT1	-3.30516	-3.24704	-3.54289	-3.49368	-4.17328	-2.84623
PTPN6	-0.0943684	-0.30374	0.129573	0.27139	0.034843	0.453793
PTPRF	1.14343	0.631174	1.17041	3.22306	0.565907	1.24572
PTPRG	0.922088	0.898112	-1.08221	-0.985824	-1.68561	-0.909519
PTPRM	0.336954	1.02324	0.621879	-0.226255	-0.0861482	-0.451028
PTPRS	0.266879	0.123123	-1.16131	-0.53385	-0.939588	1.4915
PYGB	0.528535	0.57473	1.84737	1.548	2.05369	1.51995
QPCT	0.694465	-0.100441	0.945608	-0.0871182	0.0432252	1.08936
QRFPR	0.21483	0.734832	1.57231	2.4511	1.44739	1.47122
RAB27A	0.707682	1.10877	0.553545	0.733862	1.00084	0.486172
RAD51	-2.11451	-0.548296	-1.26133	-2.8578	-2.88358	-2.72162
RAF1	-1.5277	-0.75524	-0.395611	0.345982	-0.426835	0.741327
RAMP3	-0.016732	1.0473	0.129209	-0.873368	-0.689794	-0.243833
RAN	-4.37953	-4.0194	-3.56109	-2.03255	-2.67406	-1.44635
RAPGEF3	0.494396	0.169561	-0.454247	-0.291207	-0.434926	-0.374474
RAPGEF4	-0.389685	-0.138194	0.397528	0.263049	0.524795	-0.22469
RARA	-0.51753	-1.17621	-0.8036	-1.61593	-1.35698	-1.16828
RARB	0.300387	0.824824	-0.197854	-0.875339	-0.21876	0.38958
RARG	-0.117836	0.250078	-2.76366	-1.7346	-1.68038	-0.963641
RBBP9	0.537829	0.528636	2.10363	1.95565	1.54204	2.11743
RBP4	-0.205027	-0.143287	0.766658	0.0786536	0.286618	-0.0144075
RBX1	-1.75759	-1.53711	-1.51883	-1.98045	-1.26156	-0.780052
RCE1	-2.26068	-1.90861	-3.09459	-1.91742	-3.0727	-1.93885
REN	0.201174	0.182639	-0.112596	-0.045264	-0.0439506	-0.0658856
RET	-0.334227	-0.489891	0.485555	0.691628	0.76591	0.881864
RFC3	-2.36156	-3.89044	-0.306623	-0.238566	0.551708	1.58274
RFC4	-0.361384	-1.38058	-0.538819	-0.411775	-0.299798	-0.482646
RHD	0.281688	0.928973	0.0951314	-0.874678	0.000938963	0.387419
RICTOR	-1.28656	-1.08972	-1.27695	-1.05874	-1.06008	-1.46211
RIPK1	0.736636	0.454461	0.309088	0.802059	0.423013	0.100994
RIPK2	0.892502	1.01025	-0.138317	0.284881	-0.330154	-0.932682
RNPEP	0.557326	0.438271	-1.62533	-0.473337	-0.568627	-2.01635
RNPEPL1	0.41283	0.64463	-0.26942	-0.349517	0.0847137	-0.253711
ROCK1	0.937032	0.50427	1.09562	0.026404	1.25156	0.602337
ROCK2	1.0423	0.907363	3.47236	3.65076	3.20546	4.90897
RORB	0.0468216	0.624212	0.478733	-0.29296	0.981218	0.963153
RORC	-0.345552	-0.112052	0.417143	0.385637	1.14133	0.279519
ROS1	0.470322	0.462381	-0.794193	-0.108727	-0.365098	0.435889
ROSA26	0.191141	0.175071	-0.0928459	-0.0258438	-0.0237107	-0.0443372
RPE65	0.985812	0.51275	-0.423703	-0.402098	-0.446505	-0.99237
RPL11	-2.61001	-2.17518	-0.631756	-0.635892	-2.48515	-2.24948
RPL18	-2.00768	-2.88025	0.71888	-0.158387	-0.973155	0.769896
RPL18A	-3.34789	-2.77909	-2.03751	-0.132921	-1.09089	-3.08813
RPL27A	-3.5361	-3.85096	-2.67376	-2.75518	-2.98157	-3.24298
RPL3	-2.73937	-4.53174	-2.0626	-2.43256	-3.31777	-1.69634
RPL35	-1.85085	-2.20999	-0.781642	-0.855299	-0.886795	-2.12319
RPL37A	-2.35012	-2.26279	-1.54594	-1.36665	-0.941453	-1.06389
RPL4	-2.02239	-1.621	-0.013204	-1.35071	-0.550967	-0.476072
RPS11	-2.47014	-2.74872	-1.65042	-2.55691	-3.03052	-2.26557
RPS6KA1	0.182861	0.638977	1.69435	0.861742	-0.279078	0.915895
RPS6KA2	0.964259	0.739551	1.53753	1.32209	1.05981	1.41344
RPS6KA3	-0.344128	-0.525378	2.40469	2.28467	2.36461	2.04598
RPS6KA4	-0.230853	0.615334	-0.584096	-0.658601	-0.173942	-0.524107
RPS6KA5	0.693648	0.20926	0.481342	-0.00340095	-0.289076	-0.104628
RPS6KA6	0.759917	0.439089	2.74315	2.84272	2.92204	3.36798
RPS6KB1	-1.52623	-1.0122	-1.61304	-1.41373	-0.438359	-2.4425
RPS6KB2	-0.649695	-0.796474	-0.763898	-1.55442	-2.22109	-1.52547
RPS8	-3.99634	-3.18116	-2.01961	-2.90832	-2.61283	-3.57533
RPS9	-2.5033	-3.53183	-1.23679	-1.23312	-0.211423	-1.33031
RPTOR	-2.2782	-2.42282	-1.40286	-0.463778	-0.741902	-1.29811
RRM1	-3.70166	-2.64897	-1.66336	-1.15159	-0.12347	-0.450492
RRM2	-3.82448	-3.6692	0.35477	-1.83399	0.302754	-0.742979
RRM2B	0.183543	0.382005	-0.66457	-0.250508	-0.557951	-1.6509
RTN4	-0.0871063	-0.430714	0.652735	-0.0334579	1.4086	0.683942
RUVBL1	-3.90154	-4.26961	-2.55783	-1.30845	-3.49468	-3.02005
RUVBL2	-2.02337	-1.80666	-0.206655	-0.948619	-0.300442	-0.854667
RXFP1	-0.324209	0.230314	-0.637242	0.547541	1.02734	-0.0974043
RXFP2	-0.774504	-0.37941	2.22373	2.63963	0.715522	1.84028
RXFP3	0.326818	0.032554	-1.82416	-0.769904	-2.09487	-1.81444
RXFP4	0.258026	0.755905	-0.397596	0.648762	0.0933234	0.405945
RXRA	1.09446	0.834029	-0.238778	-0.196702	0.180507	-0.174377
RXRB	0.514548	0.414395	-0.155095	0.265485	0.233992	0.424366
RYR1	0.307514	0.159381	0.993807	1.24809	1.13915	1.56339
RYR2	1.09052	0.170198	2.58621	2.15014	1.66357	2.2661
RYR3	0.541495	0.684276	0.721992	1.61909	0.538674	0.861887
S1PR1	-0.464781	-1.75368	0.501632	0.160284	0.0743473	0.717431
S1PR2	0.508547	0.415282	0.13628	-0.528257	0.907906	0.0990534
S1PR3	0.688067	1.09435	1.27285	1.1764	1.87239	1.3535
SBK3	0.922064	0.377721	1.53893	0.959736	1.39583	2.39251
SCN10A	-1.39801	0.0859159	-1.05396	-0.722198	-0.376588	-0.849985
SCN11A	0.613088	0.174113	-0.865035	-0.847345	-0.378499	0.0906482
SCN1A	0.302085	0.0640137	-0.483513	-2.2717	-0.152822	-1.00775
SCN2A	0.354357	-0.00261097	0.506726	0.163077	1.22115	0.468264
SCN3A	-0.441173	-0.0445674	-0.74216	-0.352087	-0.141008	-0.672683
SCN4A	-0.703215	0.0797015	0.704809	1.20485	1.48699	1.68112
SCN5A	-0.525049	-0.211739	-1.33732	-0.551153	-0.0755306	0.539025
SCN7A	-0.2125	0.099181	1.54296	0.195327	0.198944	0.721827
SCN8A	-0.251472	0.327886	1.84768	1.58669	1.34755	0.487939
SCN9A	0.425698	0.332736	-1.59559	-0.861159	-1.87751	-0.210843
SCNN1A	0.121565	-0.0762607	-0.224486	1.04643	1.72066	2.15261
SCNN1B	0.551022	0.744761	-0.10631	-0.172481	-0.820248	-0.354435
SCNN1G	0.541588	0.38268	-0.893575	-0.973241	-0.119435	-0.333127
SCTR	0.266911	0.0912401	-1.86613	-1.99949	-3.21739	-2.32376
SELE	0.0398491	0.551251	-0.0523711	-0.210181	-0.0133416	0.221125
SELL	0.104633	-0.170715	-1.63918	-0.53876	-0.397578	-0.268329
SELP	0.398847	0.501303	0.701064	0.503747	1.26387	0.350964
SENP1	-0.892986	-0.65331	-0.109182	0.188904	-0.0177515	-0.373724
SENP8	0.501728	0.512937	0.728256	0.747999	0.67559	1.02794
SERPINA1	0.183375	0.956471	1.69534	1.60952	0.688354	1.8254
SERPINA3	0.696567	0.259171	0.902813	1.68379	0.797151	0.615166
SERPINC1	1.27781	0.890472	-1.76991	-0.827989	-1.16808	-2.13082
SERPINE1	0.192808	0.26285	-0.655262	-0.089729	-0.310349	0.04484
SERPINF1	0.809117	0.932921	-0.183134	-0.969452	-0.376455	0.94681
SETD2	-2.96704	-1.9691	-0.0321562	-0.890904	-0.67455	-1.0915
SETD7	0.476766	0.542467	0.859765	1.7043	1.35759	1.23757
SGK1	0.703969	0.657667	-0.047682	0.938508	-0.117823	0.479088
SGK2	0.520269	0.703503	0.466867	0.338396	-0.111648	0.35279
SGK3	-0.0871297	0.175981	2.16195	1.97752	2.63403	1.67222
SGMS1	-0.231437	-0.0768681	1.10742	-0.523999	0.26488	0.549581
SGMS2	-0.302213	0.893322	1.39708	0.228545	1.12472	0.413354
SGPL1	0.92928	0.835501	-0.318307	0.272382	0.0706607	0.0621711
SHQ1	-1.76712	-1.45777	0.79607	0.894079	2.23787	0.382199
SIGMAR1	-0.17703	-1.16866	-0.065794	-0.288692	0.632336	0.427155
SIK1	0.942473	0.484739	-1.21534	0.329695	-0.995552	-0.919356
SIK2	0.883512	0.980604	0.262185	0.316243	0.322633	-0.251038
SIK3	0.653134	-0.000646195	0.759351	0.992229	-0.0562493	0.599408
SIRT1	0.501565	0.565409	0.908202	0.637817	0.959447	0.0571132
SIRT2	-0.0575677	0.506466	-0.154228	-0.407559	-2.04945	-0.196962
SIRT3	0.214867	-1.13282	-0.582497	-0.208639	1.31846	0.920913
SIRT5	1.34186	1.26301	0.688103	1.14409	1.89354	1.28323
SIRT6	0.976542	1.0705	-0.529517	-0.216136	0.505535	0.617848
SLAMF7	0.802485	0.877366	-0.249596	-0.686286	0.462165	0.401265
SLC10A1	0.882181	0.561157	-0.190835	0.282864	0.175873	0.0914239
SLC10A2	0.729608	0.204573	0.347159	-0.39822	-0.65821	-0.578937
SLC11A2	-0.104923	-0.510449	0.542564	-0.558439	-0.434324	1.06267
SLC12A1	0.726129	1.11197	-0.416656	-0.287216	-1.25722	-0.466208
SLC12A2	0.248994	0.0184525	1.89238	1.10652	0.799594	0.130523
SLC12A3	0.734628	0.275324	0.829595	0.146581	1.26353	0.486683
SLC12A4	0.250426	0.91325	-0.330534	0.660761	0.224296	0.479286
SLC12A6	0.991299	0.677852	-0.170242	0.184533	0.26782	0.157002
SLC12A7	0.684191	0.677758	0.176443	0.13662	0.0196101	-0.53136
SLC15A2	0.579766	-0.22606	-0.175871	0.208847	0.228021	-0.567811
SLC16A1	0.495517	0.251249	-0.186043	0.243337	-0.351599	-0.941078
SLC16A7	1.46602	0.08518	-1.70448	-1.82148	-1.84097	-1.44383
SLC17A9	0.866233	1.01495	-1.63819	-2.07264	-1.37666	-1.05227
SLC18A1	-0.377099	0.473712	2.69553	2.7295	2.7582	3.38032
SLC18A2	1.0302	0.215201	0.163101	0.332132	0.446617	-0.550596
SLC19A1	0.4363	0.941682	-0.958061	-0.467702	-0.790315	-0.139244
SLC1A2	0.28133	0.816834	-0.343657	-0.0782199	-0.727861	-0.105582
SLC1A3	0.51268	0.926216	1.35327	1.53236	1.05609	0.652939
SLC1A5	0.127762	0.497705	0.497465	-0.486014	0.426181	0.921879
SLC1A6	0.329547	0.483757	1.47541	-0.197713	0.747096	0.15824
SLC1A7	-0.0814321	0.39899	-0.331646	0.607344	-0.28066	0.53373
SLC22A1	0.515575	0.563797	-1.28751	-1.01096	-1.37973	-1.01
SLC22A11	0.395625	-0.0713779	0.579348	0.502367	0.57455	0.93024
SLC22A12	0.939717	0.676894	-0.748803	0.0535644	-0.825214	-0.576535
SLC22A2	0.977009	1.56172	-0.360289	0.625904	0.997021	-0.305463
SLC22A6	0.360879	-0.275097	-0.490751	-1.01008	-0.485668	-0.853789
SLC22A8	1.04662	0.0793207	-0.480184	-1.73822	-0.431009	-0.610284
SLC23A1	-0.162739	-0.0490436	0.323383	-0.36467	0.225238	0.0478121
SLC25A1	0.29577	0.59898	-0.288396	0.513928	-0.207496	-0.610547
SLC25A4	0.530637	0.205982	1.24863	1.07557	2.33839	1.22443
SLC27A1	0.509317	0.436963	0.0427978	-0.43541	0.444365	0.685203
SLC28A2	0.815328	0.601176	-0.528086	-0.58282	-0.633882	-0.3838
SLC28A3	0.960173	0.688458	-1.08026	-0.822718	-0.682986	-0.749812
SLC29A1	0.78217	1.01422	-0.219434	-0.407813	-0.606896	-0.492302
SLC29A4	0.833962	0.143724	0.388771	-0.152684	-0.233015	0.527217
SLC32A1	-0.0764818	-0.28498	-1.04456	-1.27444	-1.09754	-1.09705
SLC36A1	0.201628	0.413414	1.13951	1.355	1.11049	1.56722
SLC44A1	0.122109	0.793004	1.29597	1.1703	1.0462	1.38314
SLC47A1	-0.12316	0.373085	0.492756	1.4758	0.758449	-0.0799346
SLC5A1	0.806548	0.771768	-0.449847	-0.744175	-0.72755	-0.656804
SLC5A11	0.557373	0.898369	1.67534	1.3065	1.34476	0.512716
SLC5A2	0.976331	0.437804	0.887445	0.26728	0.431278	0.580598
SLC5A3	-0.190363	0.961073	-1.87081	-1.53687	-0.969176	-2.59771
SLC5A7	-0.0121342	0.53658	2.73164	2.69424	1.95191	1.60855
SLC5A8	0.389432	-0.0764709	0.65752	-0.2514	0.939981	-0.258994
SLC6A1	0.622778	0.892341	1.15759	0.492826	1.82943	1.30285
SLC6A12	0.103305	-0.234938	0.657608	1.05801	0.0125826	0.536462
SLC6A14	0.419557	0.267343	-1.00087	-0.704457	-1.1471	-0.50333
SLC6A15	-0.0325334	0.396266	0.899927	-0.890347	-0.165557	-0.00973299
SLC6A19	0.825042	0.892995	1.58818	0.841642	0.764043	0.36185
SLC6A2	0.617501	0.517166	1.00544	1.46912	1.05278	0.679632
SLC6A3	0.594314	0.754877	0.150774	0.51834	-0.566156	0.925555
SLC6A4	0.108234	-0.833597	-1.12343	-0.693507	-1.50607	-0.44099
SLC6A5	0.305433	0.483103	0.814329	0.344183	-0.050974	0.666622
SLC6A7	0.180178	0.0089931	-0.230197	-0.93961	-0.523408	-0.906217
SLC6A9	-0.0991319	-0.325934	-0.306778	-0.799183	0.339817	-0.0489755
SLC7A5	-0.255418	0.452172	0.388548	0.221543	0.483684	0.82537
SLC8A3	0.137742	0.679954	0.0625679	0.569711	0.870245	0.176024
SLC9A3	0.711394	1.3762	0.954867	0.657259	0.464478	1.62794
SLC9A5	0.191212	0.270985	0.262122	0.317648	-0.718585	0.549755
SLCO1A2	0.786607	1.22712	1.22905	0.145553	0.150944	0.420324
SLCO1B1	0.966524	0.58001	0.887559	-0.0700782	1.96882	0.766334
SLCO1B3	1.32655	0.236848	0.746062	1.01459	0.0103245	-0.281915
SLCO1C1	0.095767	0.260708	4.00778	3.4816	1.56932	1.99716
SLK	0.897756	1.44049	-2.19316	-2.17002	-2.09074	-1.67047
SMARCA4	-2.79191	-2.63752	-2.74695	-1.43712	-0.723473	-0.854212
SMC3	-1.45107	-1.99139	0.119871	0.189942	-0.814287	-2.01925
SMG1	-1.08388	-1.43691	-1.77284	-2.05556	-2.08037	-1.03445
SMO	0.256422	0.56674	0.769923	0.0969274	0.321688	0.361772
SMPD4	-0.326848	-0.302174	0.409781	-0.273056	0.12567	0.251923
SMYD2	0.498296	0.0227956	0.0464412	-2.23444	-0.748814	-0.307453
SNAP25	0.197581	0.713549	-0.0261742	0.29032	0.384896	-0.254935
SNCA	0.131996	0.354573	1.08614	1.54929	1.78257	1.8936
SOD1	-1.82795	-2.84404	-1.55425	-1.76842	-2.96381	-1.92697
SOST	0.460141	0.207683	0.970631	1.52065	0.15539	1.46354
AFG2A	-2.36389	-2.12848	-2.57218	-0.0460763	-1.80253	-2.43999
AFG2B	-1.4549	-1.59163	-2.05732	-2.40238	-2.49363	-1.48348
SPC24	-2.04829	-2.51089	-0.542864	-0.177492	-1.55742	0.729889
SPHK1	0.0761431	0.330068	1.2264	1.53733	0.917655	1.23313
SPHK2	-0.180019	-0.527107	0.726482	-0.47431	0.0297471	-0.212127
SPP1	1.01047	0.287822	1.36017	1.2053	0.177749	0.77507
SPR	0.56718	0.519315	-1.433	-1.12828	-0.895182	-1.01478
SPTLC2	-0.641826	0.561671	0.749427	0.193425	0.331178	0.218527
SPTLC3	0.479405	1.07548	0.552949	1.34072	-0.261183	0.301138
SQLE	-0.151531	0.442616	1.01429	-0.372343	-0.144576	-0.158846
SRC	0.242012	0.335327	0.510548	0.299233	0.587266	0.168945
SRD5A1	1.07408	0.645962	-0.468721	-0.660317	-1.4552	-0.0924014
SRD5A2	1.14677	0.981842	-0.661821	0.192837	-1.18647	-0.411425
SRD5A3	0.543386	0.0990455	0.823504	0.98052	0.578531	1.31806
SRMS	1.07104	0.683832	0.593171	-0.320457	0.101909	-0.280233
SRP72	-1.84278	-1.6816	-0.614927	-0.562074	-0.927554	-1.36192
SRPK1	0.685405	0.765694	-1.83055	-1.44213	-0.511446	-1.77253
SRPK2	0.804727	0.0988749	0.776683	-0.95832	-0.589443	-0.795706
SRPK3	-0.245144	0.537351	0.916185	0.902266	0.906865	0.66394
SSTR1	0.470625	0.40637	0.263239	0.725315	0.0996963	0.139763
SSTR2	1.10943	0.701097	0.423221	0.278614	-0.0243232	0.710235
SSTR3	0.991182	1.21168	1.32479	0.72747	0.8065	0.612137
SSTR4	1.10871	0.378791	1.84058	2.29948	3.14603	2.83802
SSTR5	0.726852	1.38526	2.88043	1.2338	1.51042	1.49666
ST14	0.139746	0.215493	-0.181551	-0.276698	0.189913	-0.193419
STAT1	-0.340952	-0.150997	-0.20599	-0.0262186	-0.821895	-0.450987
STAT3	0.0256425	0.629351	1.95908	1.85143	1.97473	3.20134
STK10	-0.127316	-0.192395	-1.87273	-2.71483	-2.36374	-1.96117
STK16	0.329452	0.732356	0.423732	-0.267157	0.40444	0.296152
STK17A	0.585137	0.63094	2.45841	1.98661	1.51199	2.43676
STK24	0.668476	0.586785	0.716117	0.0311961	1.00198	0.364756
STK3	0.776893	0.0805355	1.40788	0.565311	0.845368	0.999322
STK31	1.04832	0.984155	1.36125	2.12231	1.29879	1.55686
STK32B	0.761505	0.434229	1.65307	0.625878	1.34489	0.149981
STK33	0.467426	1.03658	-1.6951	-1.24061	0.183067	-0.794669
STK36	-0.560075	-0.286872	2.14788	2.1949	2.05861	1.06049
STK38L	1.54051	0.574193	-0.601988	-0.556103	0.338281	0.180935
STK4	0.671792	0.413554	-1.06585	-1.47817	-0.644224	-1.15885
STS	1.11538	0.121915	1.49225	1.44128	0.940325	2.55529
SUCNR1	0.023165	0.723735	0.393555	-0.0128792	1.18861	0.518119
SUPV3L1	-1.46237	-1.81865	0.530623	1.57977	0.106956	2.22158
SUV39H1	-0.982232	-1.14948	1.10718	-0.410514	-0.199562	0.477475
SV2A	-0.388797	0.0808579	-1.40566	-0.898969	-1.19505	-0.804288
SYK	0.758726	1.12545	0.938144	1.80932	0.957738	2.04561
TAAR1	0.578015	1.33267	1.2559	0.681176	-0.0531028	0.559988
TACR1	0.186952	1.03163	-2.4895	-1.42067	-1.34159	-0.531545
TACR2	0.466375	0.170165	0.645808	0.76073	1.54098	1.57135
TACR3	0.918842	0.386731	-0.842939	-1.52756	-1.06708	-1.45279
TAF1	-2.10848	-2.30788	-1.4525	-3.22233	-3.03509	-3.7271
TAOK1	0.938503	0.286542	1.24405	1.60286	0.553346	0.898884
TAOK3	0.393451	1.33791	0.766576	1.21415	0.544601	1.43258
TAP2	0.0839819	0.710535	1.15922	1.63251	1.36011	2.24758
TASP1	-0.349662	-0.970196	2.05239	1.31835	0.844105	1.16515
TBCD	-1.83797	-1.08857	-1.69955	-1.59525	-2.39277	-2.03205
TBK1	0.570426	0.268455	0.492339	0.79566	-0.323802	-0.230354
TBXA2R	0.800687	1.16007	-0.496285	-0.980946	-0.268609	0.219933
TBXAS1	0.26491	0.151164	0.564053	0.720403	1.35909	0.762696
TDO2	0.974884	-0.390601	-0.640465	-0.584802	-0.39876	-1.01765
TEC	-0.115781	0.287126	-1.74608	-1.29169	-0.841309	-0.198866
TEK	0.447391	0.295366	1.9928	0.539554	1.49183	0.726249
TEP1	-0.00350847	0.743617	0.153514	0.317971	0.0524655	0.350446
TERT	1.15501	0.694579	0.579422	0.491885	1.17965	0.926282
TESK1	-0.221817	-0.196764	-0.665497	-0.857087	-0.415379	-0.91219
TESK2	0.00907989	0.695046	2.01828	1.72259	2.05165	1.90188
TGFB1	0.47714	0.627763	-0.644357	-0.554257	-0.397517	-0.0897503
TGFB2	0.295572	0.0821031	0.819582	1.5876	1.25908	1.62712
TGFB3	0.906116	0.353543	1.39789	2.02539	2.00467	1.84118
TGFBR1	0.5846	0.310042	1.03382	0.856799	1.23063	0.530236
TGFBR2	0.0807362	0.383785	0.796414	0.705671	1.32913	0.62956
TGM2	0.786957	0.608816	0.182869	0.579206	0.957705	0.848879
TH	-0.607407	-0.00723904	0.0662634	1.05368	0.938137	0.845436
THOC5	-1.6577	-1.0193	-2.68817	-3.64868	-3.63339	-3.89911
THRA	0.974417	0.0800893	0.25062	0.818967	0.266475	0.648071
TIE1	0.326089	1.28338	-0.989231	-0.675534	-1.41362	-0.338534
TLR4	1.09591	1.20049	-0.306295	-0.0876277	-0.10271	0.0786756
TLR7	-0.342073	0.35076	-0.39992	0.979095	-0.194835	-1.36885
TLR8	1.05238	0.839449	-1.96086	-1.57024	-1.20296	-1.44089
TLR9	0.111412	0.481328	-0.288875	-1.43121	-0.375557	-1.73966
TMEM199	-1.25298	-2.30531	-5.01455	-3.08868	-3.55398	-2.27554
TMPRSS11D	0.535844	0.193299	-0.386491	-0.582905	-0.0449092	-0.196471
TMPRSS2	1.1081	0.965652	0.506449	0.494708	1.50947	1.28827
TMPRSS6	0.292758	0.140637	1.5722	0.596021	1.70065	1.81787
TNF	0.629573	0.816413	0.251869	0.0501153	0.287501	1.39625
TNFRSF4	0.355544	0.119604	0.574216	0.195176	0.502465	-0.0567004
TNFRSF8	-0.237415	-1.10567	0.973359	-0.115723	1.01452	-0.343535
TNFSF11	0.258818	0.447522	1.42244	1.24727	1.59617	0.873415
TNFSF13	0.250181	0.0837969	0.841712	1.3023	1.2709	1.0849
TNFSF13B	0.754757	0.441191	0.517622	0.289793	0.548535	0.443824
TNFSF14	0.577174	0.0901561	0.227861	0.313442	1.57514	1.48936
TNFSF4	1.04213	1.2634	0.12658	-0.115659	-0.338564	-0.592652
TNIK	-0.079961	0.68486	1.25995	0.908832	0.532515	-0.236794
TNK1	-0.0530376	0.71974	0.612147	0.795531	0.302076	0.73977
TNK2	0.274482	0.538682	-1.33537	-2.05367	-1.21608	-2.08499
TOP1	-1.5281	-2.66532	-2.89355	-3.82165	-3.36178	-3.65223
TOP1MT	0.0335888	0.248933	0.390625	0.245064	-0.446377	-0.124622
TOP2A	-2.70505	-2.53729	-2.81508	-2.97489	-1.41034	-2.93744
TOP2B	-0.295675	-0.725079	-1.90788	-0.964353	-1.57322	0.0428062
TP53	0.719707	1.03728	0.223274	0.0447177	-0.444598	-0.808797
TPH1	-0.10985	0.0832993	-0.777164	-0.62808	-0.286137	-0.518866
TPH2	-0.354052	-0.313388	-0.496237	-0.46174	-0.432879	-0.0911256
TPO	0.88935	0.220387	0.673681	0.224792	0.658971	0.224336
TPP2	1.14597	0.962288	0.168834	0.897338	1.75535	1.53595
TPSAB1	0.85325	0.491374	0.34029	0.00368195	0.6863	0.685226
TPX2	-1.36434	-2.36652	-2.222	-0.738653	-2.45307	-2.48334
TRAP1	0.0359566	0.394497	0.503279	-0.807947	-0.2077	0.497711
TRIM24	1.29862	0.696214	1.36252	0.932402	0.946185	1.01818
TRPA1	0.831464	0.763334	1.99504	2.32551	2.47626	2.60614
TRPV1	-0.385645	-0.138685	0.0783867	0.695642	0.377825	1.90894
TRPV3	0.174454	0.723221	-0.599756	0.063113	0.754086	-0.439893
TRPV4	0.556789	0.80576	1.32654	1.7238	0.0695767	0.787655
TSSK1B	0.0656423	-0.116584	1.64408	1.23129	1.3871	0.201752
TSSK2	0.094331	0.34909	1.7969	2.16716	2.11649	0.767189
TTK	-1.16364	-1.54818	-0.890274	1.93611	-0.47277	-0.354951
TUBA1A	-1.81557	-1.95824	-1.54752	-2.41044	-1.83859	-2.55667
TUBA1B	-3.22647	-3.13233	-3.18451	-3.96845	-3.55843	-3.48025
TUBA1C	-1.41233	-1.71676	-3.18557	-2.7827	-2.75698	-3.24704
TUBA3D	-0.0530376	0.535785	0.313082	0.810066	1.04818	1.22699
TUBA3E	0.0208837	0.182306	-0.167207	-0.570042	0.248943	-0.516952
TUBA4A	-0.645071	-0.136162	1.65242	1.64554	1.15473	1.22191
TUBB	-1.69146	-1.36011	-0.893528	-1.20796	-1.15791	-0.784386
TUBB1	0.342208	0.376144	0.180607	0.894433	0.896736	2.84248
TUBB2A	0.554851	0.489832	1.71407	1.27078	1.37318	1.31499
TUBB2B	-0.0372759	1.12508	0.468108	-0.69801	0.012096	-0.453147
TUBB3	-0.442808	-0.283671	0.340209	0.574759	1.00174	-0.0382925
TUBB4B	-0.191414	-0.111701	-3.21548	-3.14429	-1.98338	-2.10845
TUBB6	-0.222377	-0.27157	-0.554131	-0.999243	-1.00151	-0.949258
TUBB8	-2.11883	-1.61507	-2.56892	-2.32428	-1.91668	-2.06819
TUBG1	-2.12462	-1.57549	-1.34204	-1.20316	-0.804922	0.17059
TXK	-0.45105	-0.220803	0.218894	0.41881	-0.404157	-0.274209
TXN	-2.00165	-2.06049	-5.19697	-4.83367	-4.33247	-4.1798
TXNRD1	-1.33154	-0.526336	-2.41165	-2.20761	-3.49549	-2.49654
TYK2	0.855562	0.294147	-0.305007	-0.0358075	0.36691	0.086958
TYMP	0.135489	-0.566682	1.01476	0.534294	-0.38558	0.0264289
TYMS	-3.09757	-2.60061	-0.276243	-0.831179	0.0979418	1.17347
TYR	0.627845	0.0565097	2.00598	3.60916	2.64605	2.34043
TYRO3	-0.271227	-0.233022	0.64584	1.14175	0.93193	1.2817
U2AF2	-1.19043	-1.38154	-0.514742	-1.82091	-1.73857	-1.25464
UBA1	-3.14054	-3.99604	-2.76969	-2.47777	-4.1896	-2.50683
UBA3	-2.05744	-1.80302	1.29611	0.599741	-0.308912	-1.01996
UCHL1	0.265748	0.760437	-0.699432	-0.192202	-0.706335	-0.21579
UCHL3	0.305533	-0.0701865	0.456745	0.190744	0.35429	-0.0608661
UGCG	0.297494	0.112703	1.36126	1.12951	1.2097	0.562195
ULK1	1.49612	0.807139	0.0123649	-0.335373	-0.0994524	-0.139083
ULK3	0.243124	-0.18576	-1.75699	-1.48375	-1.14054	-0.992121
UPF1	-2.91404	-2.10582	1.6397	1.17488	1.19613	1.53656
USP1	-0.238792	1.19984	0.82341	-0.0714612	0.350722	0.385384
USP14	0.267537	0.780552	1.57636	1.62609	-0.0309652	0.317567
USP5	-2.16004	-2.23569	-2.02411	-1.80215	-2.52086	-2.82199
UTP20	-3.36797	-3.50029	-3.20644	-3.31451	-4.00857	-2.23319
UTS2R	0.925637	0.136343	1.29985	0.765949	0.980725	1.43586
VAMP2	-0.0155177	0.0464476	0.781147	0.00855414	0.505249	0.526758
VARS1	-4.44561	-4.05281	-4.46976	-5.21366	-4.46803	-4.44512
VDR	0.816146	-0.356001	-0.206174	1.05382	-0.0879438	0.448257
VEGFA	0.692994	0.955489	-0.229882	-0.852088	0.241706	-0.0102252
VEGFB	0.156171	0.15944	0.825102	0.203333	-0.0849751	0.425422
VEGFC	-0.193048	0.034986	0.252594	0.547803	-0.692545	-1.3524
VIPR1	-0.140906	0.162968	0.590063	-0.551534	0.484993	-0.281409
VIPR2	0.343733	1.07604	-0.592363	-0.838343	-0.0340986	-0.714666
VKORC1	0.964259	0.748312	0.416435	0.208162	-0.752256	-0.627587
VPS25	-2.65975	-2.595	-4.06821	-2.34975	-2.11062	-1.71385
VWF	0.545418	0.455022	-0.0580989	0.996044	-0.116552	-0.270098
WDR5	-2.03939	-2.0294	1.37622	0.976393	0.745445	1.32597
WDR74	-1.85384	-2.99146	1.36078	0.00948292	2.13688	0.767159
WDR75	-1.76058	-2.841	-1.8146	-4.53842	-2.4163	-1.80976
WEE1	-1.14566	-1.08906	0.770865	1.25203	1.02499	2.2735
WNK1	0.12854	-1.32362	-1.14555	-1.19618	-1.3884	-0.222585
WNK2	0.071055	0.166728	-0.381269	-0.482315	0.396291	0.643892
WNK3	-0.322995	0.623768	-1.04008	-1.71893	-1.86213	-0.983962
XDH	0.564542	0.175932	-0.742952	-0.332745	0.229477	0.271378
XIAP	0.16983	0.165903	-1.40658	-0.890949	-1.33364	-1.29591
XPNPEP1	-0.524418	0.0513537	-0.410523	-0.675894	-0.321856	-0.0729821
XPNPEP2	1.25691	0.325817	0.124259	0.0822017	-0.678099	0.713137
XPNPEP3	-0.313164	-0.186998	-1.10131	-1.53665	-1.38399	-1.74204
XPO1	-2.4211	-2.95081	-0.391726	-2.45428	-1.09198	-2.3488
YARS1	-1.4021	-2.00482	0.142504	-0.846881	-0.439315	-0.285083
YARS2	-4.50795	-4.043	-0.433297	-2.44559	-2.01121	-2.74509
YES1	1.13421	0.404211	-0.15933	0.564772	0.655193	-0.174175
ZACN	0.582358	-0.326144	-0.287762	0.0804185	1.98387	0.346812
ZAP70	-0.361337	0.670399	2.07238	1.58655	1.61103	1.4689
Zhang_294	1.4419	0.513101	5.00928	3.16838	4.40321	3.02006

## Sheet: HLE-LR Z-score and hits
Gene	HLEWT_DMSO_R1	HLEWT_DMSO_R2	HLELR_DMSO_R1	HLELR_DMSO_R2	HLELR_LVT_R1	HLELR_LVT_R2		HLELR mono hits					HLELR combo hits
AARS1	-0.591375	-0.843916	-1.46815	-0.467699	-2.4419	-1.71468		Gene	HLEWT_DMSO_mean	HLELR_DMSO_mean	diff (HLELR - HLEWT)		Gene	HLELR_DMSO_mean	HLELR_LVT_mean	diff (LVT - DMSO)
AAVS1	0.145276	0.152846	0.148158	0.147953	-0.213408	-0.180963		APOB	0.830981	-1.19429	-2.02527		AARS1	-0.967927	-2.07829	-1.11036
ABAT	-0.0119226	-0.0552566	0.321086	0.262942	0.0704281	0.832507		AQP5	0.760892	-1.33304	-2.09394		ABCB4	-0.209865	-1.23056	-1.02069
ABCA1	2.09543	1.64093	0.688855	0.64845	1.22992	0.906824		BRD3	0.603528	-1.40835	-2.01187		ADRM1	0.105875	-1.20574	-1.31161
ABCB1	-0.294292	-0.327666	0.304038	0.38251	0.637285	-0.542481		CALCRL	1.37624	-1.01605	-2.39229		ART1	-0.128963	-1.34432	-1.21536
ABCB11	-1.92579	-1.48301	-1.94819	-1.90982	-1.96614	-0.904563		CHEK1	-1.09807	-4.01315	-2.91508		BIRC5	-0.363458	-2.53413	-2.17068
ABCB4	1.64189	1.30422	-1.16068	0.740946	-1.39856	-1.06256		CLK3	0.541832	-1.59654	-2.13837		GATD3	0.424685	-0.597623	-1.02231
ABCC1	-0.327766	-0.100789	1.85604	1.86816	1.05844	1.45792		FCER2	0.979484	-1.10027	-2.07975		CCND1	-5.38125	-7.06399	-1.68275
ABCC2	-1.0562	-0.65519	0.0986214	0.17247	-0.155378	-0.726074		GJB6	1.03444	-1.06812	-2.10257		CCR4	0.315405	-1.19672	-1.51212
ABCC4	0.307332	0.25675	0.565647	0.1039	-0.141813	-0.0778772		HSPA5	1.5926	-3.83673	-5.42933		CDK2	-0.102743	-1.36283	-1.26008
ABCC5	-0.193121	-0.403093	1.19741	1.09036	0.446728	-0.0035076		KAT5	-0.921158	-3.17136	-2.2502		CHEK2	0.34842	-0.812505	-1.16093
ABCC8	2.33438	2.76293	0.510119	0.753438	1.82059	2.14856		LTB4R	0.584789	-1.57987	-2.16466		CHRM4	0.460191	-0.845276	-1.30547
ABCG2	-0.131526	-0.0880344	-0.110765	0.490672	0.779835	0.487483		MCL1	1.18866	-1.86525	-3.05391		CTSD	-0.764283	-1.85885	-1.09457
ABHD6	-0.454852	-0.0553879	0.810279	0.470272	-0.125493	0.0888426		NDC80	1.05511	-3.93584	-4.99095		CYP27B1	0.346039	-0.662861	-1.0089
ABL1	-0.568453	-1.20661	1.58692	1.06414	-0.713278	1.17532		NDUFB6	-1.06691	-3.06981	-2.0029		DHODH	-0.197001	-1.33015	-1.13315
ABL2	0.301067	0.487145	-1.87403	-0.736812	-0.831157	0.690123		NPY5R	0.486965	-2.12363	-2.61059		EED	-0.911942	-3.30079	-2.38885
ACACA	-2.52838	-1.64857	-0.544437	-0.296644	-0.528857	-1.20222		PAK2	-0.67396	-3.16649	-2.49253		EPHA10	0.483595	-0.649515	-1.13311
ACACB	1.16576	1.12499	1.90058	1.30889	0.424348	1.31085		PLK1	-1.47147	-3.66397	-2.1925		EPHA5	-0.964335	-2.12598	-1.16165
ACAT1	-0.551586	0.127338	-0.666917	-1.5552	-0.935506	-0.218755		PSMA3	-1.58601	-3.8216	-2.2356		ERBB3	0.106616	-1.50349	-1.6101
ACE	-0.194854	-0.598673	0.82064	0.834495	0.887344	0.11033		PSMA6	-3.60195	-6.02768	-2.42573		F8	-2.37774	-3.7058	-1.32806
ACE2	1.70475	2.03218	3.22246	4.36924	4.03872	3.85059		PSMB4	-1.71625	-4.76784	-3.0516		FER	-0.50724	-2.39734	-1.8901
ACHE	1.06289	1.02024	1.36556	0.749448	0.570548	0.187167		PSMC6	-1.71903	-3.93275	-2.21372		FPR2	-0.697679	-1.80387	-1.10619
ACR	-0.294557	-0.115723	-0.168637	-0.0193924	-0.454812	0.508444		PSMD14	-0.472029	-6.57836	-6.10633		FZD7	-0.263468	-1.50672	-1.24325
ACVR1	0.31891	-0.0335214	-0.185931	-0.619989	1.50282	0.114529		PSMD7	-1.82252	-4.65876	-2.83624		GABRA1	0.145407	-0.860693	-1.0061
ACVR1B	0.079501	-0.477521	-0.968336	-1.04118	-1.25243	-0.502657		RAN	-1.46965	-3.90099	-2.43135		GJC2	-1.10452	-2.45928	-1.35476
ACVR1C	-0.214112	-0.0988773	0.0225493	0.288938	1.13337	-0.0706334		RPL27A	-1.66687	-4.32142	-2.65455		GRM1	0.0566401	-1.18612	-1.24276
ACVR2B	1.70209	1.35627	0.326918	-0.383801	-0.964524	-0.417251		RPL3	-0.240242	-2.82198	-2.58173		GRM3	-0.612424	-1.81255	-1.20012
ACVRL1	0.374678	1.04514	-0.877262	0.0452427	0.765496	-0.353917		RPL4	-2.38028	-4.6001	-2.21982		HDAC8	0.35884	-0.692723	-1.05156
ADA	0.867886	0.843008	-0.385217	-0.81327	0.281735	-0.109104		RPS9	0.427475	-3.19385	-3.62132		HTR2C	0.130248	-1.39	-1.52025
ADAM10	-1.40274	-0.481249	-1.49502	-0.831731	-2.49489	-1.41606		RRM1	1.27007	-2.93912	-4.2092		IRAK4	-0.449658	-1.74592	-1.29626
ADAM12	0.0859827	-0.672662	0.0715867	1.06108	1.28565	0.159573		SRP72	0.255439	-2.1376	-2.39304		KCNG2	0.0518384	-0.987387	-1.03923
ADAM17	-0.599001	-0.562987	-0.260031	-0.752861	0.0563146	-0.770239		TUBB	-0.267252	-2.39715	-2.12989		KLK1	-0.423044	-1.6097	-1.18666
ADAM33	-0.654498	-0.859255	0.503019	-0.189565	0.853686	0.230454		UPF1	-0.963562	-3.04492	-2.08136		LRRK2	0.202194	-0.839419	-1.04161
ADAM8	0.580881	0.865579	1.675	1.53231	1.27429	1.46691		UTP20	-1.41801	-4.30278	-2.88477		MTOR	-2.66739	-4.82458	-2.15719
ADAM9	-1.79441	-1.58638	-0.939541	-0.243649	1.17348	-1.92587		WDR5	0.505704	-2.36496	-2.87066		NPY2R	-0.679522	-2.10811	-1.42859
ADAMTS1	1.0457	0.398026	1.17102	1.22227	0.343111	0.944061		WEE1	1.70662	-2.49626	-4.20289		NR1H2	0.0847193	-0.990935	-1.07565
ADAMTS4	0.432663	-0.423294	0.739022	0.515426	1.16929	1.19097							NRAS	-0.79136	-1.92921	-1.13785
ADAMTS5	0.257925	0.410196	0.318898	0.230918	0.691344	1.14888							NUCB1	0.485069	-0.529292	-1.01436
ADCY5	1.49871	1.67908	0.869381	0.970114	1.07102	0.967527							NUP85	-0.493458	-2.17148	-1.67802
ADCY6	1.19712	0.65132	0.499037	-0.469578	0.347903	0.299576							P2RX3	-0.310572	-1.33559	-1.02502
ADCYAP1R1	0.393742	0.101605	-2.04586	-1.22223	-0.749091	-1.31529							PDE3B	-0.1424	-1.36241	-1.22001
ADGRG3	0.517652	0.447408	-0.758653	-0.122178	-0.79804	0.355467							PDK2	0.117635	-1.08733	-1.20496
ADH1A	-0.446532	-0.0870728	-0.325881	0.0304093	-1.25922	-0.81428							POLA1	-0.990031	-2.0686	-1.07857
ADH1B	0.716205	0.706528	1.17955	0.685042	0.769487	0.940276							PRKCH	0.0752621	-1.24194	-1.3172
ADH1C	-0.343482	0.0122946	-1.02003	-1.57469	-0.553549	-1.47958							PRKCI	-1.02029	-2.02592	-1.00562
ADK	-0.697344	-0.171012	0.048575	0.458175	0.138695	0.887149							PRKD3	0.447523	-0.682696	-1.13022
ADORA1	1.68703	2.06824	0.956059	1.0616	0.0324919	0.424308							PSMA4	-0.862268	-1.92189	-1.05962
ADORA2A	0.942585	0.915048	-0.101973	0.655766	0.433617	-0.27159							PSMC4	-0.139915	-1.56293	-1.42302
ADORA2B	-0.663508	-0.844433	0.718617	1.00364	-1.19567	0.877355							RAPGEF3	0.233844	-0.768329	-1.00217
ADORA3	0.0868171	0.338748	1.38552	0.262717	1.33577	1.32094							SERPINF1	-0.816425	-1.90524	-1.08881
ADRA1A	0.578054	0.994788	1.26845	1.36716	1.028	1.68988							SUV39H1	-0.272454	-2.7286	-2.45614
ADRA1B	0.174142	0.21476	3.39785	2.14808	3.14445	2.77147							TACR1	0.0969448	-1.33796	-1.4349
ADRA1D	2.02458	2.50193	1.3447	1.96596	1.95724	1.01305							TMPRSS2	-0.626412	-1.63559	-1.00917
ADRA2A	1.32214	0.824038	-0.721835	-0.0846724	-0.250055	-0.282074							XPO1	-2.73287	-3.8776	-1.14472
ADRA2B	0.861037	0.333754	1.23765	1.51254	1.02536	1.89128							YES1	-1.38454	-2.43133	-1.04679
ADRA2C	0.936206	1.41402	0.99986	1.1729	0.630489	1.22469
ADRB1	0.672626	0.238218	0.77624	0.533826	0.0426306	-0.171563
ADRB2	0.686459	0.784019	1.46616	0.243472	2.22184	-0.355691
ADRB3	0.111206	0.115559	0.120515	0.119717	-0.241761	-0.211638
ADRM1	0.174607	0.195698	-0.211054	0.422803	-1.04429	-1.36719
AGER	2.18131	2.32435	1.18235	1.34004	0.594998	0.503993
AGRP	0.386788	0.285844	-0.763526	-0.466673	-0.374453	-0.201344
AGTR1	0.396307	0.739344	1.8027	1.74373	1.68729	1.12412
AGTR2	0.367303	0.0912262	1.23273	1.36946	1.36717	1.77303
AHCY	-1.43627	-1.47798	-0.990368	-1.93199	-1.50478	-0.792177
AKR1A1	1.24049	1.77057	0.652588	0.400047	-0.28181	-0.182642
AKR1B1	1.19528	1.14707	-0.455755	0.0510432	-1.50321	-0.622625
AKR1C3	0.582788	0.589375	2.0313	1.90269	1.50931	0.879856
AKT1	1.28396	0.813024	1.46785	1.02905	1.33547	2.1237
AKT1S1	0.753308	1.39868	-0.270789	0.555562	-0.504021	0.0803857
AKT2	-0.267049	-0.266443	0.338999	-0.354523	-0.293044	0.338567
AKT3	-0.665979	-0.480195	0.627982	1.29484	1.12584	1.0731
ALAD	0.520211	-0.174635	-0.529237	-0.883158	-1.02993	-0.63131
ALDH2	0.831338	0.595248	0.186702	-0.152902	0.611586	1.24208
ALDH5A1	0.250079	0.220959	1.49882	1.68869	-0.0759797	1.16725
ALG2	-2.64589	-2.14663	-2.89898	-2.84632	-2.41522	-3.9247
ALK	0.746895	0.806883	-0.0966699	-0.509624	-0.249335	-1.36359
ALMS1	-1.21645	-1.1237	-1.7255	-0.857752	-0.931939	-1.44828
ALOX12	-0.62573	-0.0717971	1.15592	0.846534	0.602839	-0.265024
ALOX15	1.02564	1.04628	0.969487	1.35186	0.721192	0.267114
ALOX15B	0.414253	0.921592	1.00992	0.458109	0.182183	0.269092
ALOX5	0.167658	0.226349	-0.0201992	0.69597	-0.0185252	0.121123
ALOX5AP	0.978875	0.647502	-0.260819	-0.196585	-0.151015	-1.76624
ALPL	0.591525	0.847008	-0.0333288	0.36374	0.422363	-0.0106573
AMH	-0.409581	-0.283735	-0.19759	-0.355278	-0.68443	-0.754781
AMY2A	1.16185	1.54942	1.35878	2.32866	0.678335	0.666612
ANGPT1	0.339343	0.0350062	1.84749	1.80955	-0.105073	1.52817
ANGPT2	0.601874	0.092068	0.866728	0.362157	1.42697	0.547153
ANO1	-0.151747	-0.202243	0.17632	0.447337	-0.537466	1.08082
ANPEP	0.756881	0.195786	0.49019	0.222174	-0.898592	-0.194252
ANXA3	0.126801	0.325541	1.6655	1.3507	1.71672	0.00877523
ANXA5	-0.572491	-0.909565	1.83602	1.77655	0.779104	1.83113
AOAH	-0.155994	-0.467907	0.248519	1.07613	-1.52987	0.461545
AOC3	-0.204369	-0.804713	1.83444	0.880035	1.13719	0.554123
AOX1	1.06469	1.02314	-0.405825	-0.602222	0.122907	-0.335932
APCS	-0.0221518	0.682801	-1.75045	-1.26798	-0.861331	-1.17038
APEH	-0.199228	-0.226052	0.136998	-0.16663	-0.305665	0.119709
APH1A	-0.16469	-0.217069	-0.602141	-0.0749099	0.345721	0.985649
APH1B	0.562766	0.340304	-0.175685	-0.068994	-0.538296	0.280617
APLNR	-0.0217971	-0.0272053	0.248789	-0.190632	-0.305119	-0.28016
APOB	0.56457	1.09739	-1.2174	-1.17118	-1.64192	-1.67401
APOH	0.618726	0.332892	0.848329	1.71125	1.35264	-0.104056
APP	-0.855234	-1.15109	-1.55503	-1.19128	-0.555204	0.973176
AQP1	0.241724	0.588126	0.408555	1.03759	0.637704	1.31506
AQP10	0.223022	0.453969	-0.969142	-0.56736	0.527523	-0.255661
AQP2	0.210414	-0.0088757	3.3247e-05	0.13261	0.0265292	-0.118269
AQP3	0.385478	0.391625	0.745992	0.316969	0.138251	0.494721
AQP5	0.68148	0.840305	-1.65925	-1.00684	-0.880848	-0.87792
AQP6	0.0910723	0.556257	-0.337094	-0.27252	1.31458	0.469999
AQP7	-0.420896	-0.544079	-0.629531	-0.560496	0.42599	-1.71662
AQP8	0.593395	0.566683	1.21406	1.829	1.85036	2.07089
AQP9	-0.623077	-0.866546	-0.0248941	0.372604	-0.108141	-0.47775
AR	1.29545	1.21226	0.320383	0.533922	0.314294	0.11483
ARAF	0.588788	0.206664	-0.390123	0.273427	0.225274	-0.443755
ARG1	-0.289001	-0.535557	0.445343	1.91803	-0.574289	1.53034
ARG2	0.624405	0.367463	1.72364	1.51106	1.97916	3.03236
ART1	-0.10192	-0.339133	0.0118213	-0.269748	-2.15504	-0.533607
ATAD2	0.504563	-0.242712	-1.22137	-1.08122	-1.25748	-2.02165
ATAD2B	-0.594161	-0.747863	0.672147	1.46475	2.73416	1.50971
ATM	-0.585904	-0.394765	0.64014	0.93088	0.821927	0.666562
ATP1A1	-3.03766	-4.27057	-2.45025	-2.45467	-3.22472	-2.69202
ATP1A2	0.0923948	0.260358	-1.43718	-0.269862	-0.55911	-0.39794
ATP1A3	-0.352331	-1.41788	-1.06856	-1.17411	-1.62917	-1.5691
ATP1A4	0.0110609	-0.477874	0.659882	0.524247	0.708255	-1.05107
ATP1B1	-1.02209	-0.979493	0.544618	0.984472	0.331379	0.794534
ATP1B2	-0.310726	-0.134743	-0.447508	-0.30801	-0.515272	-0.000741525
ATP1B3	0.924217	0.486926	0.770903	1.94322	0.626062	1.73588
ATP2A2	-1.33205	-1.1984	0.553922	-2.46346	-0.567863	-2.54819
ATP4A	-2.50998	-2.52178	-0.544808	-0.171184	-1.40683	-1.03581
ATP4B	-0.00532779	0.600344	-0.117082	0.0371915	-0.246703	-0.0806258
ATP6AP1	-1.6757	-1.36934	-1.10712	-1.06708	-1.97197	-1.12891
ATP6V0C	-2.76147	-3.1732	-2.33841	-3.41972	-2.92177	-2.73239
ATP6V1A	-2.78869	-2.24164	-3.02911	-4.10334	-1.81412	-2.1561
ATR	-0.680531	-0.278438	0.609226	0.417914	-0.41874	1.10721
AURKA	0.287088	0.664307	-1.7324	-0.944385	-0.294456	-1.19793
AURKB	-0.14852	-1.12924	-2.30789	-2.07655	-2.49045	-2.36621
AURKC	-0.402931	-0.106922	0.281668	0.976301	0.0460373	0.767096
AVPR1A	0.075033	0.430736	0.532233	-0.051976	-0.06346	-0.939702
AVPR1B	0.775797	0.537324	1.77524	1.07337	2.70946	1.56899
AVPR2	1.82103	1.90008	0.654703	0.656915	1.63707	0.454027
AXL	0.146562	-0.0427319	0.786972	1.2771	0.759425	1.00384
BACE1	-0.339468	0.066683	0.0590874	0.275114	-0.688547	0.219015
BACE2	-0.298514	0.0169198	1.65092	1.07518	1.09106	0.105878
BANF1	0.627017	0.750934	-0.525798	0.695744	-0.837211	-0.26
BAX	0.235378	-0.610357	2.0097	1.92573	1.19709	1.48844
BAZ2A	0.0367667	-0.200469	-0.917337	-0.456188	-1.17288	-0.513147
BAZ2B	0.108656	-0.373724	1.25977	1.41489	2.17915	1.89259
BCAT2	1.16155	0.898134	0.77682	0.75451	-0.0855156	1.11969
BCHE	-0.231704	-0.425856	1.21728	1.07775	1.32468	0.418212
BCL2	0.251616	0.496616	2.41216	2.01116	2.11274	1.93958
BCL2A1	0.495709	0.34822	0.600855	-0.687948	-0.432164	0.259311
BCL2L1	2.04257	1.86042	-0.101076	0.481373	0.36639	-0.409428
BCL2L10	-0.665331	0.462075	-0.0729163	-0.709557	-0.400286	0.198002
BCL2L2	-0.118886	0.3159	-0.79807	-0.186352	-0.982149	-0.652762
BCR	-0.121532	-0.0831952	0.529569	0.66052	0.334252	1.87062
BDKRB1	1.18693	1.37061	2.05099	1.35593	2.11882	1.91199
BDKRB2	-1.22201	-0.704624	-0.5803	-0.179655	0.663279	0.531185
BIRC2	-0.0350442	-0.535682	1.34139	2.26137	1.67681	2.43095
BIRC3	2.24119	2.05758	0.721211	2.09488	2.08301	1.15143
BIRC5	-2.01808	-1.88537	0.0924831	-0.8194	-2.88998	-2.17829
BIRC7	0.47998	0.754006	1.83694	1.07805	1.2315	0.599304
BLK	1.22432	1.41251	2.65423	2.4969	1.49739	3.41392
BLVRB	0.755686	0.190216	0.912619	1.69876	1.51852	1.13632
BMP1	0.911494	0.77329	0.685494	0.524729	0.2391	1.55446
BMP10	-0.189224	0.282996	0.833911	2.11189	0.891697	0.469776
BMP2K	-0.0985551	-0.0859129	1.74829	1.13987	1.55742	-0.343644
BMPR1A	-1.90135	-1.82828	-2.18164	-2.10373	-1.52779	-2.01465
BMPR2	0.666218	0.798051	0.388745	0.369244	1.55094	1.10681
BMX	-0.610699	-0.667014	-0.527929	0.161029	0.203718	-0.561374
BPTF	-0.0750834	-1.31389	-2.30845	-1.76781	-1.58736	-2.08944
BRAF	0.971092	1.11064	2.87354	3.46209	1.9652	2.61922
BRD1	-1.81362	-1.70641	0.301757	0.86764	0.0178311	-0.399435
BRD2	-0.767816	-1.05593	-1.29883	-0.826185	1.40453	1.10428
BRD3	0.395992	0.811065	-0.896362	-1.92033	-0.222677	-0.729836
BRD4	-0.3026	-0.357727	-2.56568	-1.5404	-1.23069	-1.58173
BRD7	-0.177379	-0.172901	-1.74023	-0.0416376	-0.442025	0.280125
BRD9	0.778377	-0.474431	-0.218585	0.186194	-0.0758767	-0.538838
BRDT	1.52788	1.56537	0.268879	1.12334	-0.0250659	0.462476
BRS3	-0.71296	-1.41383	-0.304067	-1.0725	-0.567581	-1.2347
BRSK1	-0.0337383	-0.0333105	-0.809659	-0.0490448	-0.959946	-0.451768
BRSK2	-1.06643	-1.01453	1.29542	0.424368	1.44498	1.07042
BTK	-0.706963	-0.189334	0.890272	0.412542	0.233854	1.05203
BUB1	0.680752	-0.38927	0.28444	0.354303	1.27537	0.977659
C1QB	2.04593	1.73994	1.53543	1.61585	0.929398	1.25018
C1S	-0.207544	0.365262	1.63308	1.48509	1.74081	2.21357
GATD3	0.184761	-0.543488	0.747221	0.10215	-0.872125	-0.323121
C3AR1	-1.41145	-0.247686	-1.19209	-1.19939	0.27648	0.382683
C5	-1.09022	-0.447251	-0.0756808	0.05387	-1.23572	0.205366
C5AR1	0.117656	0.12331	0.124416	0.122103	-0.235891	-0.20311
C5AR2	0.960718	0.639936	1.24111	1.68502	0.119126	0.851201
C6	1.47958	1.32056	0.81115	0.383819	0.524128	1.00648
C7	-1.48906	-1.54823	-0.420784	-0.161042	-0.0270453	-1.08475
C8G	0.916668	0.522979	1.7956	1.83625	2.11839	0.921929
AOPEP	1.05935	0.261648	0.403859	0.191619	0.242043	0.126929
CA1	-0.250126	0.0862004	-0.771432	-1.00268	-0.327989	-0.285694
CA12	0.539102	0.0607039	-0.129253	0.561578	-0.716051	-0.73935
CA13	1.51289	1.19806	0.117205	0.0884275	-0.76585	0.0457873
CA14	0.791141	1.18154	0.141726	0.419293	0.398587	-0.524247
CA2	0.479491	-0.0727001	0.313274	0.589642	1.16352	1.7713
CA3	1.04343	1.28316	0.88047	1.4977	0.729145	0.773309
CA4	0.522122	0.950458	-0.711487	0.262534	-0.457442	-0.654668
CA5A	0.429445	0.630178	-0.0240879	-0.438173	0.0791502	0.858242
CA5B	2.80496	2.63874	1.43368	2.56964	0.650829	2.09943
CA6	0.588582	0.452984	0.662357	1.11912	0.487975	-0.812449
CA7	-1.09508	-0.816978	0.0604925	-0.856002	-0.136725	-0.0490282
CA9	-0.232133	-0.617875	-0.539117	-0.944983	0.468819	-0.217884
CACNA1A	-0.0442184	-0.894357	0.684178	1.31911	-0.485841	1.14874
CACNA1B	-0.0822422	-0.0157438	-0.960098	-0.428826	0.107045	-0.49723
CACNA1C	1.5155	0.723099	0.783613	-0.497134	0.0220431	0.0780663
CACNA1D	-0.521938	-0.334529	-0.45838	-0.515651	-2.10267	-0.358205
CACNA1E	0.693342	0.377812	0.932435	1.09257	0.769108	0.957406
CACNA1F	0.92361	1.00181	-0.536624	-1.49267	-1.07084	-1.42813
CACNA1G	-0.362556	-0.0741558	0.380697	0.550132	0.293253	0.414246
CACNA1H	0.953606	0.709613	0.42917	1.05772	0.055864	0.398688
CACNA1I	-1.12856	-1.26873	-0.878092	-0.7055	-0.732261	-1.42964
CACNA1S	-0.487894	-0.337655	-0.811175	-1.10768	0.0677696	-0.0750709
CACNA2D1	1.17246	1.67496	1.52447	0.217624	0.864973	0.623749
CACNA2D2	0.0856516	0.0886754	1.32804	0.391363	0.947669	0.691767
CACNA2D3	0.900714	0.97488	0.703932	0.988646	1.13611	0.340686
CACNA2D4	1.30597	1.29503	-0.0922779	0.30815	-0.308437	-0.39198
CACNB1	-0.00395425	0.448211	0.38603	0.261213	0.469894	0.983623
CACNB2	-0.41295	-0.115353	0.781437	1.51286	0.83905	1.2859
CACNB3	1.42046	1.92397	-0.306068	0.790945	1.06734	0.504949
CACNB4	-0.790744	-0.432123	0.839695	0.992784	1.40354	2.82336
CACNG1	0.785416	0.780409	-0.214791	0.012423	-0.803342	-0.585848
CACNG2	0.604498	0.482396	0.145058	0.59309	1.4468	0.674611
CACNG3	0.0343997	0.299986	-1.10629	-0.93251	-1.04211	-0.335751
CACNG4	0.0867512	0.0152844	0.17391	0.438938	1.28646	0.221262
CACNG5	2.10664	2.2619	1.5496	1.18326	1.16054	1.86341
CACNG6	1.08486	0.757309	0.186431	0.324575	0.0957318	-0.0670536
CACNG7	0.473616	0.241634	-0.264451	-1.18981	-0.507222	-0.992674
CALCA	0.291017	0.590408	1.15553	0.3045	0.601137	0.425746
CALCB	0.532692	0.10813	1.12604	0.476937	1.49353	0.879398
CALCRL	1.44292	1.30955	-0.990167	-1.04194	0.0209019	0.0474195
CAMK1D	-0.258048	-0.0958224	0.660813	0.771773	1.77653	1.61169
CAMK2B	-0.279764	-0.150628	0.401251	0.436172	1.48089	1.06837
CAMK2D	0.631852	0.814615	0.798986	0.684874	0.450814	0.442986
CAMK2G	0.243599	-0.0543361	0.218666	-0.285877	2.51506	-0.514614
CAMKK1	1.11318	0.754076	-0.141584	-1.17673	-1.22254	-1.09674
CAMKK2	-0.934074	-0.499383	-0.879949	-0.804106	-0.235372	-0.571491
CAPN2	1.38413	1.01272	0.712553	0.79939	1.66798	0.0803483
CARM1	-2.8052	-2.2214	-3.39803	-2.70653	-3.42916	-2.70095
CASP1	0.268046	-0.0756946	0.3752	-0.0160638	1.08899	-0.381459
CASP10	0.170085	-0.44492	-0.651555	-0.402716	-1.18111	-1.12543
CASP14	0.696448	0.527112	0.809037	0.426883	0.439807	0.635176
CASP2	-0.850751	-0.0901233	-0.30956	-0.622964	-0.73727	-1.83234
CASP3	-0.575052	-0.949159	-0.259551	-0.95776	-1.17755	-0.750806
CASP4	-1.11146	-1.34282	-0.109653	-0.041657	-0.178621	-0.367548
CASP5	1.5255	1.13668	1.96776	1.57229	2.64138	1.33836
CASP6	0.415504	0.859699	-0.498622	-0.489311	-0.67415	-1.2084
CASP7	-0.253398	-0.629452	-0.481208	-0.900548	-0.389192	-0.796205
CASP8	-0.0326646	-0.786738	0.941086	-0.326096	-0.475358	0.538598
CASP9	-0.462407	-0.645271	-0.87424	-0.510387	-0.142172	-1.24865
CASR	-0.504693	-0.227621	-0.460678	-1.00114	-1.61742	-0.872281
CBR1	0.436925	0.979371	-0.594877	-0.277522	0.171371	0.0430878
CBS	-0.823381	-0.398894	1.29334	0.584063	2.09913	0.144506
CBX4	1.22533	1.60344	1.11914	0.651314	1.05389	1.24917
CCKAR	0.251946	0.323692	0.689846	1.22986	2.14488	1.14379
CCKBR	0.103111	0.573129	1.27539	0.086724	1.40572	1.55636
CCL11	1.79179	1.58386	1.84019	2.49811	0.611261	2.57128
CCL2	0.679767	0.502871	0.768446	1.02941	-0.756544	0.176478
CCND1	-4.43132	-4.06734	-5.17874	-5.58376	-6.96611	-7.16188
CCR1	0.725437	0.303209	0.651248	0.906853	1.15274	0.352251
CCR2	-0.0252133	-0.279696	1.44836	1.27258	0.160969	0.876127
CCR3	0.537858	1.01211	-0.242756	-0.530852	0.859757	0.383257
CCR4	0.351464	-0.076309	0.609403	0.0214072	-1.41928	-0.974161
CCR5	0.145276	0.152846	0.148158	0.147953	-0.213408	-0.180963
CCR8	0.557333	0.319033	-0.384517	-1.16026	-0.140283	0.0394945
CCR9	0.423298	0.247276	-0.0795169	0.031063	1.42979	0.732377
CCT2	-2.68318	-3.0502	-4.23109	-3.94042	-2.31464	-3.09924
CD14	1.35158	1.26961	-0.522871	-0.0240575	-0.38721	-0.324471
CD2	-1.00366	-0.311647	-1.33919	-1.04346	-1.59646	-0.372673
CD200	-0.299739	-0.611352	0.367077	0.959832	-0.153457	-0.0309752
CD248	-1.92245	-1.92934	0.114292	-0.217802	-1.50759	-0.591362
CD274	1.01271	0.493183	1.34478	1.4773	2.36163	2.29051
CD28	-0.761477	-0.502236	-1.36627	-1.12346	-1.23532	-1.5589
CD38	-0.742625	-0.537808	0.33037	-0.0738725	-0.020837	-0.786346
CD3D	-0.358298	-0.631939	0.343138	-0.578563	-0.678346	-0.536357
CD3E	0.520536	0.943676	0.459023	-0.226286	1.49433	0.598315
CD3G	1.22025	1.24777	1.26682	1.84234	3.00223	2.15291
CD4	0.150318	-0.542591	-1.46109	-1.74584	-2.36147	-2.51453
CD40	-0.51222	-0.390727	-0.921796	-1.15245	-1.71586	-1.98793
CD40LG	0.654559	0.834188	0.695377	0.497868	-1.16988	-0.310722
CD52	1.22081	1.06972	0.901182	0.940461	-0.328466	1.72469
CD74	1.52976	0.855955	1.15746	2.22578	2.45851	1.4993
CD80	-0.00257422	-0.805811	-0.619901	-0.687341	0.141163	-0.869904
CD86	0.847736	1.0141	1.52119	1.42913	2.39367	2.59768
CDC42BPA	0.26297	0.748946	0.491073	1.29507	0.471834	-0.254447
CDC42BPB	0.172509	0.573403	0.280113	-0.172945	0.835447	-0.437008
CDC7	-2.75301	-3.09055	-2.49643	-2.27444	-2.25252	-1.57655
CDK1	-3.55021	-3.77626	-4.66024	-4.49434	-3.13237	-4.29756
CDK10	-0.687558	-1.11399	1.44254	1.60524	0.903493	0.3928
CDK11B	-0.871264	-0.7074	0.205903	0.0941613	-0.314149	-0.521087
CDK12	-0.622259	-0.396756	-0.153021	-0.943693	0.668137	-1.06049
CDK13	-1.40651	-1.91673	-0.384678	-0.103146	-0.745586	-0.615818
CDK14	-0.381153	-0.123322	-0.409708	-0.0691475	0.0208448	-0.353416
CDK15	0.10645	-0.0431732	-0.173156	0.507827	0.70142	1.18745
CDK16	-0.057674	-0.496212	-0.543184	-0.540036	-0.543422	-0.754112
CDK17	-1.90918	-1.30889	0.0884602	1.06515	0.818522	0.693936
CDK18	-0.362799	0.348142	0.476643	0.505675	-0.462085	1.08512
CDK19	-0.69133	-0.605787	-0.225028	-0.160477	-0.501428	-0.30134
CDK2	-0.93865	-1.32736	0.316924	-0.522409	-1.21471	-1.51095
CDK20	0.335161	0.561845	-0.0183881	-0.222214	-0.383224	-0.0350508
CDK3	0.438405	0.759432	0.0564693	0.515738	0.125822	1.21861
CDK4	-0.420901	-0.335517	-2.40227	-1.85829	-2.10041	-3.28621
CDK5	-0.0123587	0.54582	0.346254	-0.134275	0.460585	-0.124102
CDK6	0.190684	0.216049	-0.0371718	-1.25416	-1.41201	-1.36864
CDK7	-0.555088	-1.20745	0.161185	0.763471	0.0373674	0.0416682
CDK9	-2.43681	-1.90433	-2.30888	-1.95807	-1.28198	-1.21516
CDKL1	-0.315039	0.0991551	-0.367245	-0.841936	-1.87597	-1.23378
CDKL2	-0.195568	-0.335936	-0.861075	-0.413429	-0.511202	-0.485256
CDKN1A	0.38937	0.506234	2.02174	0.913213	1.2084	1.55835
CDKN3	-1.0619	-0.636983	-0.789103	-1.13542	-1.52852	-1.04863
CDS1	-0.64954	-0.348224	-0.154397	0.738035	0.882863	0.562122
CECR2	1.39016	1.46824	0.389104	1.07418	1.20196	1.1946
CELA1	-0.77434	-0.894681	0.438362	0.704019	1.69699	0.0778103
CENPE	-0.442693	-0.584525	0.62508	0.646947	-0.0838731	0.122953
CERK	0.131611	0.483941	0.228291	0.636866	-0.344507	0.780186
CES1	-0.245566	0.595636	1.73488	2.5557	2.71255	0.819514
CETP	1.07691	1.50594	1.54507	0.544717	0.472149	1.67307
CFB	0.0567495	-0.379199	-1.15201	-0.781022	-0.7157	0.0999202
CFD	1.63201	1.28261	2.92198	2.74578	1.85586	1.89599
CFTR	-1.45008	-1.70872	-0.731404	-1.32912	-1.4299	-1.28761
CH25H	0.0531551	-0.118357	-0.0242049	-0.415889	0.265636	-0.386077
CHEK1	-1.27762	-0.918522	-3.38178	-4.64452	-2.61168	-1.85664
CHEK2	0.636289	0.259583	-0.218991	0.915832	-1.38776	-0.237246
CHKA	-1.7546	-1.52887	0.941829	0.692008	-0.456751	0.328138
CHRM1	0.257832	-0.251332	-0.0101754	0.455331	-0.0245712	-0.259567
CHRM2	-0.202789	0.152829	0.244176	0.201414	0.237442	0.667827
CHRM3	0.459957	0.700728	-0.0840134	-0.670055	-0.765147	-0.624906
CHRM4	0.891644	0.611081	0.364685	0.555696	-0.896595	-0.793956
CHRM5	1.31454	0.649769	1.02257	0.271023	0.304643	-0.000446727
CHRNA1	0.978249	0.229493	0.126922	0.685102	2.62439	0.0192263
CHRNA10	-0.0598818	0.450876	-0.050342	0.230088	-0.852191	-0.848652
CHRNA2	1.55791	1.29739	1.29134	2.19863	1.58622	1.48493
CHRNA3	0.407817	0.760169	-0.940231	-0.472409	-1.6141	-1.63575
CHRNA4	1.23009	0.59386	1.82108	1.56081	1.83769	0.952906
CHRNA5	-0.881309	-0.251104	0.315606	0.563206	0.830003	-0.0339726
CHRNA6	0.171141	0.183528	0.204735	0.512159	1.33889	0.138906
CHRNA7	-1.99206	-2.44193	-2.12279	-1.0865	-0.174688	-1.75059
CHRNA9	-1.48681	-0.503944	0.596224	1.07354	-0.369033	-0.115248
CHRNB1	0.402089	-0.0292245	-0.0874896	0.325962	0.969182	0.279621
CHRNB2	-0.693328	-0.456587	0.888549	0.300842	1.16631	0.62889
CHRNB4	-0.884032	-0.603787	-1.05187	-0.635808	-0.665662	-0.559495
CHRND	0.289128	-0.00423439	0.65786	0.661044	1.34534	0.775001
CHRNE	0.447295	0.292541	0.945157	0.729796	2.19277	0.899726
CHRNG	-0.522659	-1.1831	-0.486336	-0.780504	-0.123674	-0.810319
CHUK	0.000232444	-0.587415	-0.593487	-1.92591	-0.679216	-0.911638
CIAO1	-0.931755	-1.47859	-1.64039	-1.0765	-1.20697	0.887599
CLEC4C	0.539073	0.909131	1.29736	1.38775	0.801592	0.403217
CLK1	-0.132057	-0.569009	-1.53902	-0.65343	-0.701451	-0.831019
CLK2	-1.08143	-0.055793	-0.502236	-1.69911	-0.435557	-2.06771
CLK3	0.336473	0.747191	-1.799	-1.39408	-0.389124	-1.16034
CLK4	-0.788374	-1.21561	0.820145	0.8996	0.0619976	-0.497796
CLU	0.359248	0.452736	0.823605	0.763467	0.945533	0.197546
CMA1	-0.531164	-0.260609	1.13139	0.86431	0.987564	0.893771
CNGA3	-0.0324379	-0.0827579	-0.407634	-0.0839411	1.34464	0.936003
CNR1	-0.131388	-0.890295	0.312522	0.845242	0.431002	-1.13543
CNTN1	-0.960567	-0.968259	-0.869049	-1.12208	0.829178	-0.546448
COL4A5	1.51194	1.66932	0.565774	1.29315	0.819727	0.383297
COMT	1.28542	1.63742	1.88752	1.63734	1.93454	3.03594
COPS6	0.337363	-0.372037	-0.438087	-0.60598	1.26417	-1.06237
CPA1	0.216635	-0.0745583	0.0158108	-0.89259	-0.45718	-0.188595
CPB1	0.167277	0.260666	-0.202795	-0.6321	0.025727	0.0687623
CPB2	0.591591	-0.0656528	-0.312767	-0.484528	-0.330022	0.264323
CPM	-0.318166	-0.437382	-0.0791815	0.510884	-0.318935	-0.519013
CPN1	0.353911	0.744312	0.991558	1.44259	0.949229	1.16722
CPT1B	0.116192	-0.563191	-0.64438	-0.334095	-0.814275	-0.542834
CPT2	-1.0034	-0.579674	-1.56777	-1.5482	-0.559711	-2.52268
CRBN	-0.133971	0.143159	0.590392	0.419259	0.379487	0.467149
CREBBP	0.554933	0.691248	1.80928	1.01843	1.96991	1.1224
CRHR1	-0.658173	-0.779278	-1.07531	-1.17512	-0.920493	-2.16425
CRHR2	0.267447	-0.0398308	0.144343	0.522588	0.559316	0.191452
CSE1L	-4.02291	-3.65384	-4.01914	-3.58575	-1.40374	-2.57969
CSF1	-0.142007	-0.0947401	1.1367	0.883905	1.98733	3.29724
CSF1R	-0.318472	0.0667698	-0.0805862	0.434095	0.0698144	0.23006
CSF2	0.50199	0.768156	0.857266	0.992859	1.64762	-0.0471045
CSF2RB	0.983659	0.791945	0.76671	0.15597	0.652647	0.803173
CSK	-0.89382	-0.035267	-0.0492489	-0.442441	3.97937	3.84962
CSNK1A1	-3.53421	-3.31902	-1.04278	-0.344704	2.39918	1.67971
CSNK1D	-0.145404	-0.45306	0.518075	-0.298058	-0.210927	0.438161
CSNK1E	0.112669	-0.0228537	0.15161	0.336902	0.39934	0.0476749
CSNK1G1	0.999023	0.0376727	-0.00440032	0.40365	-0.0905465	0.380096
CSNK1G2	1.06164	0.86853	0.299764	0.70891	0.827982	0.254209
CSNK1G3	0.831814	0.0360995	0.594226	0.992079	-1.03419	1.11528
CSNK2A1	-0.190777	-0.427677	-0.696856	-1.03505	-1.01135	-0.933854
CSNK2A2	1.92058	1.60452	0.801475	0.511463	0.849257	1.08129
CSNK2B	-2.10079	-1.98036	-1.34553	-1.28958	-1.52596	-2.9911
CSRP2	1.44932	1.38174	1.30026	1.66443	1.55037	2.38153
CSTF1	0.566487	0.730165	-0.942219	-1.17097	1.04146	-0.566857
CCN2	0.0899191	-0.448051	1.51063	1.49206	2.84734	1.6337
CTH	0.793732	2.14752	1.4088	1.67199	2.08635	1.01859
CTLA4	0.524913	1.20719	0.956266	1.19154	0.829666	1.17533
CTRC	0.481417	-0.0224532	-0.418359	-0.578517	-0.799057	-1.38063
CTSA	0.38164	0.2963	0.487587	-0.000469999	1.1397	0.3084
CTSB	1.45313	1.79202	0.284987	0.30052	0.559264	0.499203
CTSC	0.268199	0.00538062	0.33845	-0.21559	0.81712	0.826091
CTSD	-0.203452	-0.337683	-0.511849	-1.01672	-1.57964	-2.13807
CTSE	0.148166	0.341113	-0.857398	0.231566	-0.1327	0.328308
CTSF	-1.07065	-1.11229	0.126478	0.0178982	-0.369891	0.433565
CTSG	-0.235553	-0.206297	-0.748402	-0.525126	0.00222353	-1.08718
CTSH	0.303609	0.77208	-0.713526	-0.980149	-1.52747	-0.0715494
CTSK	1.63084	1.19272	-0.839709	-0.962362	-0.283089	-1.72731
CTSL	-0.0431855	-0.11079	0.198909	0.564164	1.50629	0.831767
CTSO	-0.0449362	-0.024478	0.428258	1.53372	0.545438	0.975037
CTSS	0.479188	-0.185761	-0.217038	0.49407	0.92746	0.759825
CTSV	-0.00315229	0.336253	0.55678	0.667112	1.19366	0.192694
CTSZ	0.322432	-0.222189	0.663277	0.387881	1.10114	1.13184
CUL4A	0.956594	0.892615	0.471674	0.80257	0.199515	0.913741
CXCL10	1.67192	1.75268	1.37377	1.57217	-0.11365	0.516651
CXCL8	0.118295	0.248122	1.2839	1.03791	0.860283	0.983938
CXCR1	0.9287	0.182642	0.606518	0.580173	0.361285	0.74266
CXCR2	-0.105485	0.0725395	-0.505412	-1.01554	-0.629503	-0.211762
CXCR3	0.937465	0.459475	0.493984	0.9029	0.11682	0.0947964
CXCR4	-0.50181	-0.237625	0.560654	0.298486	0.0768158	0.735368
CYP11A1	0.125341	-0.339712	-0.830164	-1.27705	-0.530855	-1.34177
CYP11B1	1.83625	1.75777	0.604691	1.2599	0.371242	0.949648
CYP11B2	0.918944	0.652977	0.867278	1.05392	1.07837	0.485334
CYP17A1	0.000369291	-0.713168	-1.08819	-1.03784	0.217276	-1.1941
CYP19A1	0.303231	-0.133297	0.441509	0.775973	0.112564	0.747299
CYP1A1	1.31929	2.05735	1.28129	1.51898	2.69917	2.46527
CYP1A2	0.39967	0.0802878	-0.534514	-0.531381	-0.148124	-0.952673
CYP1B1	1.77442	1.44944	1.80617	2.1141	3.00628	2.05959
CYP24A1	0.0461602	-0.0786475	-0.122171	-0.0578071	-0.0792206	-0.993073
CYP26A1	-1.1187	-1.19152	-0.517591	-1.14286	-1.53951	-1.62161
CYP27A1	0.506372	-0.0313902	0.439852	0.317463	0.141618	0.299395
CYP27B1	0.541682	0.115135	0.585519	0.10656	-0.275885	-1.04984
CYP2A6	-0.821886	-1.03344	0.218775	0.547661	0.0454371	0.280776
CYP2B6	0.268449	0.111052	0.331857	0.555648	0.628527	0.153997
CYP2C18	-1.18025	-1.09489	-1.74357	-1.53367	-2.09803	-1.37967
CYP2C19	-1.03283	-1.34379	0.719292	0.939012	1.70199	-0.731261
CYP2C8	-0.761291	-0.436112	0.211886	0.688564	1.3686	0.891554
CYP2C9	0.00572177	0.343128	0.633576	1.09299	2.28281	0.84005
CYP2D6	2.1115	2.04518	0.936254	0.66208	0.222817	0.98746
CYP2E1	1.18906	1.18947	0.0686623	-0.0695377	0.821696	2.34628
CYP2J2	0.12186	0.131089	0.127819	0.128236	-0.232332	-0.197722
CYP3A4	1.74256	1.33886	2.37221	1.6678	3.30304	2.85601
CYP3A43	-0.146498	0.435329	0.801565	1.06897	1.0792	1.00009
CYP3A5	-0.676158	-0.265579	0.241163	0.271556	-0.257276	0.0960363
CYP3A7	0.108328	0.733118	1.07114	1.10627	2.1922	2.89934
CYP4F2	-0.0319824	0.855788	1.32195	0.0900539	0.669662	0.650133
CYP51A1	1.39271	1.14607	-0.0842198	0.157129	0.204735	0.960805
CYSLTR1	0.397894	1.01944	0.546623	0.760183	-0.27298	-0.637034
CYSLTR2	0.437001	0.834796	1.00481	0.959383	1.8607	2.64775
DAPK1	0.413726	0.336794	1.19028	0.348443	1.88299	1.31308
DAPK3	0.242846	0.0112626	-0.614585	-0.0416712	0.211142	0.049801
DCLK1	0.735941	0.733528	-0.0563166	-0.774146	-0.429817	-0.681908
DCLK2	2.5524	1.84898	1.07607	1.14956	0.327698	0.856756
DCLK3	-0.558191	0.034776	-1.43388	-0.687001	-1.03559	-1.13873
DCPS	-0.287979	-1.87229	-0.500886	-0.610438	-0.562936	0.540564
DDAH1	1.56206	1.25209	0.174624	-0.167602	0.609315	1.76944
DDB1	-2.23618	-2.2412	-2.21788	-2.52298	-1.23262	-0.776905
DDC	0.457408	0.0294922	-0.158816	-0.280331	0.0262534	-1.16998
DDR1	0.745392	0.0280261	1.57502	1.9459	1.00172	0.774444
DDR2	1.45914	1.68953	0.830892	0.588678	0.567027	0.95793
DEGS1	-1.24175	-1.11798	0.115369	-0.301835	0.549927	-0.87665
DEPTOR	-0.100065	0.10078	0.425535	0.5324	0.145994	0.357306
DGAT1	0.037027	0.59729	-1.29317	-1.33016	-1.47492	-1.94462
DGAT2	0.120777	0.0740034	-0.551676	-0.382737	0.299924	1.38363
DHDDS	-3.85642	-3.71272	-3.34727	-3.61791	-3.06815	-3.04718
DHFR	-1.70027	-0.880337	-1.41238	-0.792078	-1.00465	-1.09678
DHODH	-0.531337	-0.679718	-0.0220845	-0.371917	-1.22447	-1.43584
DHX15	-3.85881	-4.69081	-3.75434	-2.29429	-3.91388	-2.2412
DIO1	-0.464989	-0.664786	-0.714694	-0.525201	-0.157377	-0.354079
DKK1	1.37369	0.649009	-0.369384	0.321961	-0.376652	-0.295955
DLL4	0.0983369	0.478291	-1.38493	-1.36815	-0.358738	-0.379037
DLX3	-0.341321	0.157434	0.113363	-0.561155	0.121014	-1.10661
DMPK	-0.125126	-0.119376	1.12673	1.74211	1.26255	1.24283
DNMT1	-1.26005	-0.663326	-0.884437	-0.5489	-1.00613	1.1566
DNMT3A	1.88997	2.22917	2.1706	2.33133	1.8308	1.31105
DNPEP	1.67825	1.95648	0.302928	0.406428	0.625292	-0.453952
DOT1L	-0.416873	-0.337434	-1.16011	-0.650738	-1.5104	0.386448
DPEP1	-1.15345	-0.315146	-0.235285	-0.268309	-0.634886	-0.522749
DPP4	0.463964	0.569955	-0.854887	0.11301	-0.745358	1.37899
DPP7	1.72316	1.15186	0.401728	0.460336	-0.0588719	-0.12137
DPP8	-2.0569	-1.83165	-0.98317	-1.92077	-2.34706	-0.222056
DPP9	-1.38007	-1.84404	-0.760643	-1.09063	-0.324063	-0.752499
DRD1	-1.3062	-1.80199	0.941108	0.745422	0.227854	-0.286278
DRD2	0.50158	0.184178	1.40733	1.83044	1.2236	0.390209
DRD3	-0.87554	-1.05943	-1.05373	-1.24522	-2.35304	-1.89803
DRD4	1.17055	1.09523	1.27894	1.90765	1.94082	2.21816
DRD5	0.943676	0.596744	0.275697	-0.193176	-1.12054	-0.206772
DYRK1A	0.865538	0.46544	1.98034	0.912473	1.40517	1.80262
DYRK1B	0.953789	1.20439	1.57317	1.57505	1.19283	0.999567
DYRK2	-0.409071	-0.924947	-0.933368	-1.61661	-1.43817	-1.88158
DYRK3	1.76575	1.60028	2.55795	2.822	2.22478	1.74621
DYRK4	0.808118	0.770816	0.303485	0.136566	0.276161	-0.234814
ECE1	0.247439	0.690743	-0.184154	-0.421276	-0.61596	-1.07427
ECE2	0.519647	0.926413	0.631861	1.97762	0.117071	-0.27892
ECT2	-1.91001	-1.7492	-2.00935	-3.2804	-2.23815	-1.41377
EDNRA	0.129077	0.138016	0.132792	0.133184	-0.226945	-0.194418
EDNRB	0.550585	0.411046	0.189326	-0.0596572	-0.714652	-0.360462
EED	-3.29204	-2.8634	-1.04477	-0.779117	-2.94709	-3.65449
EEF2	-2.56785	-2.24221	-0.292781	-1.44557	-0.245192	-0.0386318
EEF2K	0.518753	0.845889	1.71242	1.39094	1.94068	0.4763
EGFL7	2.03705	1.65238	-0.318782	-0.358535	0.287853	-0.855814
EGFR	0.461256	0.392266	0.601367	0.913098	-1.92668	-0.993984
EGLN1	0.23175	-0.0960017	-0.279279	-0.981035	-1.15726	-0.588922
EGLN2	1.65422	1.56025	1.5334	2.01749	1.25023	0.793576
EGLN3	-0.624423	-0.23057	-0.499504	-0.191229	-0.639154	-0.843996
EHMT1	0.194695	0.721795	2.40717	2.33623	2.48047	1.25189
EHMT2	1.09614	1.04335	1.02264	1.06667	1.83039	1.90974
EIF2AK1	0.352704	0.401999	-0.622227	0.0898541	0.566936	0.968095
EIF2AK2	0.754651	0.377424	1.20686	0.505068	1.58421	0.621556
EIF2AK3	-0.491687	-0.560415	0.97026	-0.119165	1.50339	0.488337
EIF2AK4	-1.24633	-2.67982	-1.68344	-1.85183	-1.51084	-0.975067
EIF4E	-4.54521	-3.96521	-4.66894	-4.23745	-3.58583	-3.52796
EIF5	-2.80313	-2.5509	-1.94833	-2.31925	-2.28311	-1.78667
EIF6	-2.45378	-2.67468	-0.972796	-2.73195	-2.33889	-2.14105
ELANE	0.984888	0.9211	1.77446	1.61268	0.940727	0.976425
ENG	0.223858	0.106375	1.39449	1.80856	0.629889	1.33418
ENPEP	1.74938	1.36238	1.41551	1.45868	1.18064	2.18356
ENPP2	-0.776169	-0.280164	3.05255	1.56733	1.2113	2.7078
ENTPD1	-0.415941	-0.698185	0.361423	0.525687	0.939112	0.00844806
ENTPD2	-0.419774	-0.109174	1.34399	1.20756	1.80762	2.1041
EP300	1.80332	1.30204	1.16581	2.6827	1.13068	-1.11838
EPCAM	-0.896022	-1.4295	-0.692057	0.00789748	-1.35655	-0.777078
EPHA1	0.579176	0.396984	0.794239	0.536357	0.576001	-0.00351672
EPHA10	0.204278	0.210546	0.366915	0.600275	-0.656663	-0.642366
EPHA2	0.154697	0.51665	1.92751	1.59673	1.45469	1.36469
EPHA3	0.54003	0.873261	-0.0297067	-0.490032	-0.991602	0.644565
EPHA4	0.0871778	0.0077722	-0.294459	-0.427063	0.0347703	-0.674868
EPHA5	0.701872	-0.491872	-0.975369	-0.9533	-1.40572	-2.84624
EPHA6	-0.336658	-0.226105	-0.862781	-1.06216	-1.08399	-0.984773
EPHA7	0.910487	0.592717	0.956918	0.549325	1.89366	0.541583
EPHA8	1.26047	1.08688	1.51044	1.45677	2.2252	1.54278
EPHB1	0.701186	0.579248	0.624813	0.485825	-0.0453944	0.0677469
EPHB2	0.74391	0.589339	0.870575	-0.177479	-0.155823	1.04735
EPHB3	-0.914723	-0.95013	-1.03512	0.0380547	-1.17537	-1.00648
EPHB4	1.47754	1.83849	1.67585	1.01391	0.649801	0.813727
EPHB6	-1.18839	-0.933141	-0.385756	-0.79265	-0.92902	0.0638691
ERAP1	0.143331	-0.411123	-1.48459	-0.610603	-0.733086	-1.53942
ERAP2	0.342585	0.24615	2.58447	2.06361	1.15041	3.01473
ERBB2	-0.245317	0.0732064	0.972465	0.861604	-0.706783	-1.70468
ERBB3	0.492486	-0.256939	-0.684797	0.898028	-1.06355	-1.94343
ERBB4	-0.714139	-0.515797	-1.62254	-1.85419	-0.937615	-2.26494
ERG	0.149591	-0.537458	0.312265	0.497132	0.879069	0.0787529
ERN1	0.252816	-0.0723068	0.727758	-0.0118396	0.65842	0.191446
ESR1	0.195067	0.384604	-0.323865	-0.394131	-0.0027474	-0.279773
ESR2	0.435304	0.319629	-0.592609	-0.402632	-0.60589	-0.682689
ESRRA	0.506221	0.427599	-0.062303	0.485497	1.20478	0.099753
ESRRB	0.518251	0.572462	-0.570097	-0.229366	-0.499404	-0.420174
ESRRG	-0.764761	-1.25604	0.0467025	-0.207609	-0.879636	-0.214667
EZH1	0.627137	1.08906	0.180924	1.16838	1.90983	0.168741
EZH2	-0.151785	-0.00781317	-0.183144	0.372162	-1.31736	0.0165956
F10	0.329753	0.186918	1.07875	0.582925	0.889997	0.631504
F11	0.162315	0.218125	0.158183	-0.267904	-0.537194	-0.0122062
F12	1.4495	0.877254	0.664489	1.75953	0.1138	1.09
F2	1.10851	1.1781	0.868671	0.43059	0.107678	-0.060991
F2R	0.00759016	0.554375	-0.307254	0.299538	-0.771485	0.296472
F2RL1	0.408428	0.306916	2.75117	2.11778	2.88317	1.99206
F2RL3	0.150566	0.0219478	-0.627817	0.0807071	-0.0729572	-0.0459399
F5	1.35902	1.50721	0.432246	1.35508	-0.154546	0.349326
F7	1.09609	0.844302	0.514388	1.04654	-0.117844	0.198584
F8	-1.3321	-1.17735	-2.19312	-2.56236	-3.28456	-4.12705
F9	1.00028	0.578253	0.359898	0.0457723	0.553598	-0.289287
FAAH	-1.13549	-1.13887	-0.79404	-1.74758	-1.96876	-1.5811
FABP3	-1.61811	-1.44023	-0.506574	-1.05241	-1.82002	-1.25534
FABP4	1.113	0.525517	0.308616	0.920033	0.969874	1.08632
FABP5	-2.44726	-2.29262	-3.84955	-3.6833	-3.631	-3.30051
FAP	0.664265	0.699278	-0.90251	-0.508944	-0.710558	-1.07013
FARSA	-2.40585	-2.57431	-2.76847	-1.66774	-2.20098	-1.54313
FASN	-1.41929	-0.885081	-1.40666	-1.01895	-2.19094	-0.346827
FBL	-1.29839	-1.87213	-0.814304	-0.860238	0.109708	-0.580371
FBP1	0.129757	-0.487504	-0.929339	-1.63774	-1.44829	-1.15066
FCER2	0.925663	1.0333	-0.817423	-1.38311	-0.426685	1.55306
FCGR2A	0.100271	0.0237439	0.0566984	0.179704	-0.374481	-0.108895
FDFT1	-0.608247	-0.396027	1.10598	0.484979	1.99788	0.669549
FDPS	-3.09707	-3.24128	-2.93611	-2.39183	-1.38346	-1.67066
FER	-0.14191	-0.239001	-0.115297	-0.899183	-1.51421	-3.28048
FES	-1.0331	-1.00202	0.257332	-0.132303	0.40614	0.3038
FFAR1	-0.157464	0.0953001	1.37266	1.00299	0.807798	0.364063
FFAR2	-1.3184	-1.00038	0.770871	0.958677	0.176641	-0.334917
FGA	1.0112	0.980364	1.06931	0.796037	1.80199	1.01471
FGB	0.525966	0.209903	0.521904	0.161181	-0.720734	0.138615
FGF1	0.583392	0.346313	0.583436	0.47636	0.41012	0.479346
FGF2	1.46507	1.6834	2.48025	1.92323	1.32369	1.49018
FGF23	0.357963	0.412185	0.00228141	-0.842873	-0.712465	-0.63116
FGFR1	-1.06599	-0.696506	0.0571989	-0.93456	1.44903	1.04677
FGFR2	-0.498717	-0.18016	1.51358	0.96646	1.74279	0.805324
FGFR3	-0.532006	-0.199605	-0.934204	-1.2102	-1.21567	-1.17488
FGFR4	-0.518147	-1.21172	1.28366	0.53711	1.29314	1.38494
FGG	0.139416	-0.0392798	-1.56084	-1.01313	-1.31589	-1.33783
FGR	0.387542	0.20674	0.338656	-0.34723	0.771052	0.642187
FKBP1A	-0.0342667	0.173001	-0.285563	0.542878	1.92907	1.16968
FLT1	2.50561	2.50433	1.75326	2.2221	1.82676	2.24327
FLT3	1.8084	2.20553	1.6341	1.65033	0.571773	-0.0919998
FLT4	0.696263	-0.137309	-0.01029	-0.788738	0.751753	0.263062
FNTA	-3.66506	-3.16823	-1.36374	-1.18358	-1.73854	-0.264408
FNTB	-2.04319	-2.9349	-3.24991	-1.76341	-2.10749	-0.0352765
FOLH1	0.669192	0.673499	-0.656148	-0.892386	-1.42023	-0.580848
FOLR1	0.750124	0.291132	0.809855	0.163642	-0.552914	0.317613
FPR1	-1.12921	-1.48688	0.328914	0.492023	0.731182	-0.387142
FPR2	-1.88831	-1.4017	-0.662438	-0.73292	-1.81115	-1.79659
FPR3	-0.0968597	0.280808	0.535903	0.83283	0.600576	0.48834
FRK	-0.632438	-0.33485	-1.42163	-1.35857	-1.64033	-0.445172
FSHR	-0.589348	-0.612385	-0.699176	0.451035	-0.572465	-1.1651
FURIN	0.282381	0.0354702	-0.605695	-1.24245	-0.396734	-0.660835
FXYD2	-0.294959	0.171055	0.613468	0.0448164	1.8162	0.843657
FYN	0.910598	0.430481	-0.0146235	-0.354903	0.899696	0.86342
FZD1	0.681477	0.939377	0.0109104	0.124631	-0.271345	-0.399582
FZD2	-0.691317	0.141962	1.1984	-0.0694911	-0.453187	-0.227307
FZD5	-0.627495	-0.490161	0.450962	-0.0843248	-0.375605	-0.138981
FZD7	1.38265	1.02202	-0.669105	0.142169	-1.11925	-1.89418
FZD8	0.296342	-0.081412	1.03385	1.5268	1.74702	0.626078
GAA	0.933016	0.555954	-0.422562	-0.0442038	1.80654	1.46822
GABBR2	1.57661	2.06255	0.698008	2.07907	1.26265	1.66883
GABRA1	-0.833841	-0.338217	-0.195376	0.486189	-1.241	-0.480385
GABRA2	0.601881	0.323813	2.14316	1.08622	2.64128	1.49147
GABRA3	0.675333	0.208225	0.896549	0.343125	0.770383	1.35591
GABRA4	0.317974	0.621414	0.16938	-0.0706112	-0.525228	0.0195737
GABRA5	0.337948	0.230521	0.294554	0.225667	0.046983	0.0439516
GABRA6	0.040141	-0.310831	-0.200825	-0.589769	-0.597554	-1.74411
GABRB2	1.32424	1.08714	1.48999	1.94708	1.14238	1.04647
GABRR1	0.276827	0.086817	-0.0109153	-0.423442	-0.695476	0.0854098
GABRR2	0.303673	0.312619	-0.0321481	1.08807	-0.634675	-0.491319
GABRR3	0.82275	0.52699	-0.409081	-0.931194	0.281152	-0.0111439
GAK	-1.17803	-1.77181	-1.02537	-0.490992	-1.01504	-0.609589
GALR1	0.6158	0.886446	0.890306	0.941063	0.735181	0.913523
GALR2	1.26461	1.0418	1.22008	1.43972	1.11482	0.602524
GALR3	0.312524	-0.0188359	-0.76068	-0.129857	-0.695414	-0.0893003
GART	0.105851	-0.437335	0.488631	0.597126	0.915379	0.509829
GBA1	-0.327392	-0.585778	1.19133	0.277178	0.43255	0.236093
GC	0.736569	0.867823	0.0744137	-0.142079	0.170871	-0.401209
GCGR	1.35672	1.29241	0.410743	0.178881	0.208798	1.03539
GCK	1.00309	0.624003	-0.68777	0.453375	0.527444	-0.754076
GDF2	-0.390589	-0.324964	-0.740594	-0.379931	-0.116573	-1.05593
GGCX	0.116778	0.267789	0.301917	0.014472	0.883633	0.939831
GGPS1	-4.09274	-5.16984	-5.62543	-5.03769	-2.87227	-3.54882
GHR	-0.268985	0.213608	-0.0122514	-0.478137	0.25062	0.314084
GHRHR	1.22757	0.495785	0.72265	0.370241	-0.374434	0.00544029
GHSR	0.663933	1.13174	0.988494	0.918483	0.780486	0.935492
CBLIF	0.244323	-0.511392	-0.384818	0.37637	-0.814706	0.149666
GIPR	1.34161	1.56928	1.17866	0.94912	0.107515	0.832275
GJA1	0.190406	0.109254	0.901088	-0.16153	1.08462	1.57899
GJA4	0.558007	0.960729	-0.320865	-0.13726	-0.566514	0.158544
GJA5	1.28672	1.52715	0.189384	0.165997	0.676601	0.0478126
GJA8	0.909663	1.13794	-0.16125	0.273819	0.468478	0.905669
GJB2	0.0420864	-0.255519	-1.25941	-0.0992832	0.273002	-1.14278
GJB3	-0.0121559	0.57583	-0.0666171	0.225638	-0.172033	-0.924875
GJB4	0.967196	0.959001	0.395602	0.35547	0.411363	0.649368
GJB5	0.207162	0.126316	1.56676	1.38173	1.35893	1.24496
GJB6	1.02163	1.04726	-1.68481	-0.451432	-0.269858	-0.391043
GJC2	-0.287919	-1.06138	-0.479649	-1.72939	-1.8242	-3.09436
GJD2	0.110586	0.451275	1.22255	0.576562	1.66817	0.521138
GJD3	-0.134978	-0.378607	0.79584	0.798214	0.140842	0.50679
GJD4	0.771651	0.0651468	0.992157	1.62392	0.785583	1.5713
GLP1R	-0.602876	-0.452865	0.347138	1.06178	-0.0209991	1.17655
GLRA3	-0.486665	-0.436201	-0.434804	-0.349794	-0.72232	-0.358575
GLRB	1.61167	1.1487	-0.191608	1.11768	-0.169092	1.16317
GLS	0.311162	0.224329	0.798575	0.239003	0.529139	0.522636
RACK1	-5.14692	-4.53347	-2.34415	-4.465	-2.41002	-2.92276
GNG7	0.295614	0.200277	1.02114	1.0446	0.368403	0.925758
GNRH1	0.360115	0.720367	0.605263	1.08578	1.779	1.69697
GNRHR	0.816255	0.631595	0.881869	0.114158	0.695026	0.0640898
GP1BA	1.04457	0.858879	1.7574	1.63883	0.939877	1.81519
GP2	0.959354	1.10019	-0.126372	-0.59103	-0.394225	-0.508416
GPD2	0.997984	0.720891	1.31148	2.1614	1.78953	2.63509
GPER1	0.607153	1.11631	0.473705	0.706427	0.132762	-0.0331728
GPN2	-1.70145	-2.17032	-2.65208	-2.58877	-2.25596	-1.49803
GPN3	-2.8457	-2.61175	-1.10324	-0.743775	0.205844	-1.0577
GPR139	0.579636	0.838752	0.655236	0.072534	0.356029	-1.06051
GPR55	0.481189	0.760937	1.88818	1.60729	2.26229	2.19723
GPR87	-1.39488	-1.21194	0.737729	0.109386	0.704114	-0.61669
GRIA1	0.845395	0.753859	2.09328	1.54334	1.14549	2.45028
GRIA2	-1.03352	-0.872893	-0.0557904	-0.386912	-1.21607	-0.425928
GRIA3	-0.509578	-0.33071	-0.346364	-0.985543	0.739625	-1.75137
GRIA4	-0.032947	-0.52336	0.248876	0.488264	-0.905436	-0.245331
GRIK1	0.287546	0.361755	-0.0894553	-0.262959	0.412363	-0.505949
GRIK2	0.842614	0.832862	1.0666	0.926069	1.02962	1.03588
GRIK3	-0.329126	-0.574816	-0.669257	-0.241969	-0.243915	-0.512837
GRIK4	-0.361657	-0.364701	1.88909	1.75576	1.74626	1.77373
GRIN1	1.33199	1.67221	0.311271	0.837797	0.470136	-0.0281387
GRIN2A	0.0789225	-0.0366624	0.192073	-0.490749	-0.429839	0.271975
GRIN2B	0.452399	0.564954	0.541735	-0.0615506	0.126305	0.981961
GRIN2C	1.2404	1.30347	1.02116	0.618221	0.930338	1.02916
GRIN2D	0.747051	1.47727	0.770125	1.87373	1.2998	1.33963
GRIN3A	0.0502529	0.27077	0.197676	1.46278	0.672387	0.841775
GRIN3B	0.452088	0.0633938	-0.576526	-0.377887	-0.175864	0.954561
GRK4	-0.136119	0.191782	2.45987	0.46208	1.51114	1.74358
GRK5	1.42279	1.38658	0.730404	1.24973	0.65258	0.933018
GRK6	0.683606	0.0943765	0.663648	0.311668	0.175789	0.976793
GRK7	1.21876	1.51632	-0.694089	-0.945388	-0.69038	-1.28689
GRM1	0.558212	1.31858	0.104664	0.00861646	-1.89156	-0.48068
GRM2	1.96084	1.24295	0.557404	0.838972	0.766983	1.71905
GRM3	-0.560088	-0.207372	-0.181938	-1.04291	-2.6879	-0.937195
GRM4	0.452166	1.11093	0.864482	-0.556941	-0.133414	0.290057
GRM5	-0.391942	-0.488262	0.0937225	0.235354	0.796377	-0.0734546
GRM6	-0.36897	-1.12605	1.06851	0.902931	0.184796	1.43053
GRM7	0.446436	0.383383	0.574892	-0.142758	1.19914	0.58905
GRM8	0.717394	1.07033	2.07352	2.26665	2.13964	2.27577
GRPR	-0.280511	0.0261334	-0.362382	0.366999	0.842414	0.151577
GSK3A	-0.608795	-0.967991	1.0232	1.77763	0.613312	-0.175525
GSK3B	0.693895	0.527327	1.86474	3.49219	3.30065	3.73992
GSR	0.455937	0.752741	0.12743	0.0828118	1.68385	0.917509
GSTP1	0.0348486	-0.141637	-0.126946	-0.0654856	0.393959	-0.919682
GUCY1A2	0.0677444	0.345181	1.23631	1.20438	0.93304	0.71991
GZMB	0.659698	0.339813	0.203422	-0.705648	0.320976	0.361335
HCFC1	-1.26169	-1.23698	-3.48462	-1.59997	-3.76801	-2.06004
HCK	-1.23246	-0.909489	-0.691126	-1.09745	-0.150124	-0.321455
HCN4	0.585492	0.478989	0.473541	1.33989	1.58322	1.05076
HCRTR1	-0.787098	-0.62348	-0.179694	-0.188863	-1.0108	0.10827
HCRTR2	-0.843122	-0.919812	1.5099	0.907474	0.812348	0.707448
HDAC1	0.506388	0.45683	0.368826	-0.514639	0.136633	0.0554912
HDAC10	-0.160396	-0.300549	-1.26378	-1.87819	-1.84788	-1.96535
HDAC11	0.293747	0.381636	0.0180579	-0.500157	0.0102281	-0.14556
HDAC2	0.621513	0.170866	2.32665	1.72622	2.37138	0.150048
HDAC3	-0.702272	-0.243995	-1.00162	-3.12498	-0.927958	-1.47818
HDAC4	1.23052	1.3554	1.32889	0.25437	0.551984	1.01959
HDAC5	1.31877	0.972009	0.927345	0.805108	0.276486	1.63856
HDAC6	-0.68418	-0.373236	-1.37179	-1.46305	-0.0950786	0.00776896
HDAC7	1.78844	1.47023	1.07653	1.38381	1.63528	1.73879
HDAC8	0.120173	0.00930043	0.206013	0.511668	-0.943774	-0.441671
HDAC9	-0.146874	-0.138388	-0.428995	-1.0895	-0.467623	-0.232637
HDC	0.0453835	-0.309692	-0.986597	-0.665447	-0.0564967	-1.28123
HEATR1	-4.1209	-3.86884	-2.2493	-3.10606	-3.43924	-1.62607
HEBP1	1.45425	1.49111	1.04293	1.11824	1.97616	1.55216
HGF	0.061598	-0.0180391	0.158658	0.621465	0.489123	-0.173253
HIF1A	-0.693335	-0.666889	-0.558342	-0.0499795	-0.152429	0.477231
HIPK1	-0.448669	-0.134225	0.113385	0.664974	0.601328	0.0276414
HIPK2	1.58958	0.974369	0.323437	0.299472	0.509251	-0.43389
HIPK3	-0.550516	-0.542141	-0.16412	-0.532149	-1.01854	-0.46048
HMGCR	2.08129	1.72793	-0.192118	0.574632	0.942971	0.69446
HMGCS1	-4.14362	-4.67259	-2.09867	-2.79856	-2.45729	-2.12567
HMOX1	0.583921	0.577403	0.81533	1.0222	-0.289492	1.18575
HNF4A	-0.636772	-0.892332	0.302261	-0.526691	-0.741143	-0.29948
HNMT	-1.34518	-1.58927	-0.685213	-0.313769	-0.457388	0.154066
HNRNPK	0.256755	0.511174	-0.414736	-0.707057	-0.277751	-0.295731
HPD	-0.0667016	0.633064	-0.942034	-0.276215	-0.226567	-0.188623
HPGD	-0.139002	0.0983763	0.941981	1.66032	0.76759	-0.136814
HPGDS	0.0872505	0.310063	-0.844685	-0.207213	-0.096002	-0.190268
HPSE	-0.383867	-0.604026	-2.47583	-1.39193	-1.37183	-1.67339
HRAS	0.573404	1.12494	-0.606059	-0.260039	0.114017	0.258334
HRH1	-0.0210652	-0.158081	0.423638	1.14187	1.049	1.2919
HRH2	0.490152	0.354967	1.27517	0.962749	1.7644	1.91334
HRH3	0.569883	0.179713	0.150714	0.191482	-0.321425	0.826778
HRH4	-0.469688	-0.391683	-2.38253	-2.10559	-1.80467	-1.1638
HSD11B1	0.791491	0.516385	0.89656	1.40509	1.57784	0.782407
HSD3B2	-0.133631	-0.496007	0.019732	0.169193	-0.235906	0.638507
HSP90AA1	0.125219	0.113972	0.216407	0.764704	0.0624987	-0.356703
HSP90AB1	-1.45084	-1.38652	-0.198482	-0.660135	-0.987967	-1.67506
HSP90B1	-1.48162	-0.972238	-0.977752	-0.868421	-1.83951	-1.55511
HSPA5	1.41048	1.77472	-3.71417	-3.95929	-4.91064	-3.94803
HSPA8	-1.46315	-1.50018	-0.46463	0.468529	-0.182932	0.310311
HSPB1	2.49094	2.04675	1.98204	2.42836	2.03854	1.84697
HTR1A	0.528243	0.656672	1.56494	1.11925	0.821602	0.431704
HTR1B	0.934771	1.56018	1.81141	1.29641	2.44644	1.35776
HTR1D	-1.54716	-1.88932	1.7384	1.94081	2.2008	2.06211
HTR1E	-1.07948	-1.75042	0.108985	-0.271162	-0.108599	-0.870758
HTR1F	-1.2385	-1.07822	-0.227219	-0.718769	-0.140906	-0.411453
HTR2A	0.810627	0.889361	0.183423	0.780818	0.734882	0.0237911
HTR2B	0.344045	0.650181	-0.648283	-0.705517	-0.70695	-0.960042
HTR2C	-0.146555	0.120239	-0.585357	0.845853	-1.77795	-1.00205
HTR3A	0.285849	-0.141041	-0.258515	0.113836	0.57507	-0.27996
HTR3B	-0.533987	-0.977968	-0.426837	-0.578078	-0.435839	-0.886244
HTR3C	-0.670693	-0.579161	-0.0691349	-0.456281	-0.0369199	0.3325
HTR3D	-0.759488	-0.76861	-0.361981	-0.0340978	-0.768037	-1.07544
HTR3E	0.58472	0.654406	-0.33547	0.125819	0.143618	1.1006
HTR4	0.928862	1.55313	1.80013	0.786009	0.328834	1.51203
HTR5A	0.776132	0.96263	0.675233	1.12481	1.18144	0.685742
HTR6	0.626773	0.606395	1.20685	1.08029	0.857486	1.74328
HTR7	-0.753219	-0.453572	0.00430493	0.517832	-1.0168	1.58938
HTT	-0.561888	-0.708956	0.997381	0.436043	-0.139715	0.142642
ICAM1	0.648438	0.658448	0.678321	1.05811	1.46255	1.22561
ICAM3	0.333149	0.394118	1.07535	-0.144334	0.374677	0.480731
ICE1	-1.50668	-1.79541	-1.6837	-0.846214	-0.925943	-1.71289
IDE	-1.17049	-1.13237	-1.09488	-0.488121	-0.109032	-0.720355
IDH1	-0.845746	-1.29106	0.523802	0.207267	0.43232	-0.837493
IDH2	0.891072	0.41179	-0.386883	0.28499	0.386574	1.18607
IDI1	-0.789371	-0.927338	-0.823917	-1.30385	-0.953097	-0.881011
IDO1	0.615902	1.07003	0.697143	0.338383	0.282848	0.164255
IFNAR2	-0.647629	-0.580498	0.802503	-0.917865	0.899562	1.09413
IFNG	-0.870136	-0.281984	0.118512	0.262865	0.958956	0.18018
IGBP1	-0.938445	-1.13996	-0.833844	-0.590743	-0.679424	-1.54639
IGF1	0.988006	0.881404	0.782503	1.6751	0.790466	1.17379
IGF1R	0.944367	0.734255	0.598766	0.671013	0.744641	1.31262
IGF2	0.578834	0.884856	-0.00533535	-0.398981	-0.0227844	0.340818
IKBKB	-0.176178	0.530773	1.58023	1.7186	2.51354	2.85941
IKBKE	2.1403	2.54021	0.111301	-0.28633	-0.118875	0.688908
IL10	0.488187	0.558112	2.07743	1.84839	2.11187	1.88266
IL12A	-0.211672	-0.54989	-0.752088	0.396724	0.288528	-0.405928
IL12B	-0.15395	0.470553	-0.498962	-0.574622	-0.583975	-0.927344
IL13	1.62345	1.62673	1.50214	1.33008	0.793039	1.12337
IL15	0.0611158	-0.301417	-1.05306	-0.173957	-1.41287	-0.834652
IL17A	-0.129456	-0.524264	-0.186668	-0.692471	-0.516441	-0.920687
IL17RA	1.15658	1.07038	0.799726	1.17863	1.30126	0.666668
IL1A	-0.749631	-0.237866	-1.92042	-2.22783	-2.41938	-1.81438
IL1B	-0.969749	-1.06819	0.717816	1.43787	1.09649	0.909606
IL1R1	-0.843918	-0.940144	-1.41896	-1.77945	-0.358062	-1.66596
IL1R2	1.12383	1.17486	-0.0969484	-0.646752	0.430109	-0.38829
IL22	-1.18872	-0.798773	-1.95398	-1.25551	-1.14982	-0.560376
IL23A	0.740842	1.03355	0.510408	0.622373	0.497737	-0.0251201
IL2RA	-0.12415	-0.259684	1.59446	1.0402	1.86507	2.59063
IL2RB	-0.478951	-1.61852	-1.03992	-1.2289	-0.395039	-0.412836
IL2RG	0.989837	1.05953	-0.0131702	0.142532	-0.67379	0.0426311
IL4	0.0176762	0.242873	0.630878	0.445447	-0.511914	-0.55413
IL4R	-0.360478	0.190838	1.0094	0.766728	0.417891	0.626385
IL5	1.87244	1.94183	1.45367	1.92877	2.18404	1.71888
IL5RA	-0.0703337	-0.326293	0.344435	0.0597407	-0.726631	-0.507706
IL6	-0.263804	-0.169513	0.0635037	0.24873	0.739162	1.52917
IL6R	0.671894	0.710973	0.69784	0.708141	-0.128484	0.729203
IL6ST	-1.00921	-0.380877	0.654178	0.120703	2.03812	1.52393
IL9	1.35213	1.05313	1.05248	1.33503	0.869202	0.523229
ILK	-0.934774	-0.765737	-0.121058	-0.13356	0.237443	0.379183
IMPA1	-0.508074	-0.272719	0.24356	0.778043	0.706449	-0.0943584
IMPDH1	0.0364629	-0.14588	-0.234711	0.389985	1.48618	0.95897
IMPDH2	-1.2649	-1.86192	-1.43326	-1.6406	-2.36296	-2.18671
INHBA	1.84214	2.0955	0.925669	0.416478	0.495145	-0.0937206
INPP5A	1.75702	1.5852	2.24275	1.9338	1.73024	1.49318
INPP5D	0.242155	0.235017	1.37314	1.33938	1.37588	1.30696
INPPL1	0.629996	0.611914	1.4038	1.08211	0.558367	1.93367
INSR	-0.020176	-0.184964	-0.363016	-0.22251	-0.707969	-0.825555
INSRR	0.720243	1.5767	0.372715	0.595544	1.18881	0.818875
IRAK1	0.895611	1.29386	0.569307	1.41777	-0.160963	-0.427974
IRAK3	1.63043	1.32475	-0.717248	-0.253058	-1.01815	-0.0169394
IRAK4	-1.57192	-1.08743	-0.671436	-0.22788	-2.14321	-1.34863
ISG15	0.47547	0.196369	1.59446	1.21435	-0.285548	-0.0727279
ITGA2	1.29837	1.8367	1.20578	0.85681	-0.0353357	0.884747
ITGA2B	-0.682101	-0.752178	-0.409382	-0.269113	-0.288752	-0.347082
ITGA4	0.12347	-0.0277496	1.07232	0.881909	-0.33761	1.06131
ITGA5	1.37804	1.33711	2.47033	2.56838	1.24777	2.34147
ITGAL	0.928142	0.693462	0.844007	0.526892	0.952765	1.47812
ITGAM	0.715058	-0.756421	-0.00626784	-0.224016	-1.25407	0.234739
ITGAV	-1.63468	-1.20083	-1.46822	-1.97678	-2.33389	-0.77648
ITGB1	1.47597	1.70064	1.34537	0.461238	0.965383	1.50436
ITGB2	-0.271068	-0.269149	-0.0978628	-0.527674	-0.422954	-0.68287
ITGB3	-0.129325	-0.439949	1.32833	1.75445	0.612698	0.25695
ITGB5	0.300202	0.584601	-0.525023	-1.22339	-1.27793	-1.87553
ITGB6	0.775416	0.356827	-0.471842	-0.09103	0.51592	0.621338
ITGB7	1.67043	1.68839	-0.762246	-0.28773	-0.476236	0.4395
ITK	0.0384208	0.554135	0.40614	0.148106	-0.393937	0.217131
ITPKA	0.661804	1.08101	-0.309205	0.386378	-0.320932	0.244185
ITPKB	-0.509467	-0.181269	-0.512785	-1.40492	-0.768311	0.523018
ITPR1	0.53732	0.690196	1.47189	0.905619	0.898538	0.535691
ITPR2	0.254278	-0.000257893	-0.377425	-0.333659	-1.20443	-0.498898
ITPR3	0.834578	0.435721	-1.11199	0.0296408	-0.284323	-0.428117
JAK1	-1.31872	-0.450895	0.652314	0.60852	0.546812	0.999197
JAK2	-1.23049	-1.16534	-1.53621	-1.19285	-0.120621	-0.550483
JAK3	-0.516853	-0.359194	-2.41693	-1.59074	-1.37306	-1.62475
JUN	2.09767	2.46453	1.48009	1.24133	1.08065	0.909647
KARS1	-0.677693	-0.62106	-3.21476	-0.813803	-1.69166	-0.133977
KAT2B	1.10091	0.62148	0.863421	0.783172	-0.0930463	0.777704
KAT5	-0.651439	-1.19088	-3.36097	-2.98175	-4.05804	-2.48565
KAT8	-1.76779	-1.58846	-1.44527	-1.00814	-1.2292	-2.36031
KCNA1	-0.68902	-0.0782879	1.23527	0.601399	1.56984	0.617622
KCNA10	-0.170695	0.0176868	-0.417388	0.366339	0.457637	0.296108
KCNA2	0.675431	0.563353	-0.240242	0.0105487	-0.718739	-0.159133
KCNA3	1.36534	0.419822	-0.195556	-0.200786	0.270987	-0.530036
KCNA4	1.87268	2.55202	2.88846	2.62815	2.6532	3.01886
KCNA5	0.74788	1.02111	0.880916	1.3261	1.20745	1.44286
KCNA6	0.337258	0.41031	0.0801337	0.242872	0.897253	0.709035
KCNA7	-0.76523	-0.344556	-0.100567	-0.637024	-1.19617	-0.399777
KCNB1	-0.0168847	-0.272218	-0.605478	-0.151576	-1.36622	-1.2061
KCNB2	-0.292919	-0.18825	-0.817953	-0.534751	-1.23754	-1.7366
KCNC1	0.568774	-0.0622317	-1.33996	-0.289858	0.620647	0.992371
KCNC2	1.41176	1.78109	-0.505639	0.693567	-0.0649043	0.196936
KCNC3	-0.0673252	0.612354	-0.457818	-0.626848	-0.233181	-0.683374
KCNC4	-0.0308268	0.0346486	1.16217	1.70117	0.0331794	-0.4425
KCND1	1.05688	1.21432	0.152644	-0.606628	-1.41461	-0.366154
KCND2	1.21476	0.46068	3.0345	2.87196	2.2731	2.36418
KCND3	1.04533	0.962582	-0.261276	-0.497263	-0.328139	0.91151
KCNF1	-0.13516	0.64262	0.45549	-0.355594	-0.1307	-0.734499
KCNG1	0.712007	0.374617	1.36649	-0.265934	0.275601	1.42903
KCNG2	0.965292	0.705697	-0.0613376	0.165014	-0.863354	-1.11142
KCNG3	-0.682493	-0.254125	-0.315711	-0.122529	0.590747	-0.324458
KCNH1	0.679867	0.648258	-0.486977	0.0518162	-0.277941	-0.475636
KCNH2	0.958793	0.529968	0.220537	-0.566568	-0.414433	-0.528682
KCNH3	0.750816	0.238986	-0.00502331	-0.307472	-0.588167	-0.698362
KCNH4	0.33347	-0.0470991	1.24853	1.0359	0.176953	0.089038
KCNH5	-0.961225	-0.883655	1.16599	0.777964	1.09921	1.68483
KCNH6	-0.633524	-1.18679	0.124878	0.394275	0.716061	0.355142
KCNH7	0.318735	0.246284	0.0874149	0.0733132	0.183822	-0.49517
KCNH8	0.827768	0.464643	0.136056	0.58888	1.01225	0.675867
KCNJ10	0.902077	1.88636	1.77381	1.80711	1.44539	0.814873
KCNJ11	0.598057	0.129295	0.545322	0.968467	-0.0334474	0.745906
KCNJ12	0.078259	1.07869	0.313346	-0.0122441	0.675073	0.100009
KCNJ14	0.148919	-0.0249349	0.873633	1.05271	0.594897	0.165046
KCNJ2	2.21019	2.10946	1.84342	2.3108	2.43274	2.7514
KCNJ5	0.202004	0.242928	-0.396989	-0.0716453	-1.11104	-0.740547
KCNK13	-0.401819	-0.614836	-0.458464	0.0279439	-0.49857	-1.06442
KCNK18	1.2355	1.0102	1.01261	0.445399	0.486833	0.747121
KCNK3	-0.198751	-0.201062	1.71352	0.761251	1.30706	0.951855
KCNK9	1.31072	1.43739	0.565682	0.961196	-0.357236	0.0676682
KCNN1	0.971088	1.44929	0.964467	1.11141	0.244207	0.278958
KCNN2	-0.542354	-0.631535	0.594374	1.35022	0.481175	1.17768
KCNN4	-0.0747405	-0.345752	-0.207158	0.497539	0.417093	0.452589
KCNQ1	-0.948366	-0.236363	0.388653	0.122871	0.593734	1.09271
KCNQ2	0.216016	0.604531	1.0895	0.430028	0.488091	0.61455
KCNQ3	0.571825	0.333664	1.56951	0.754427	2.12731	0.818695
KCNQ4	0.519836	0.273837	0.827096	0.153637	0.902323	0.386833
KCNQ5	0.854048	0.66576	0.228786	0.104448	0.708047	0.281393
KCNS1	0.628826	1.12619	-0.413697	0.480559	0.399728	0.706217
KCNS2	0.365205	0.5261	1.40062	0.79075	1.04928	0.68279
KCNS3	0.747641	0.926176	0.763021	0.572945	0.871557	0.357242
KCNV1	0.476847	0.448225	0.291723	0.74407	-0.163611	-0.0328262
KCNV2	0.107077	-0.237899	0.142274	-0.671647	-0.0779563	0.580311
KDM1A	-1.2659	-1.47678	-2.69995	-2.69739	-2.6122	-2.79672
KDM2A	-1.68021	-2.32478	-2.25301	-1.7262	-1.45969	-1.98939
KDM3A	0.283496	0.198207	-0.158488	-0.467498	0.434446	0.775279
KDM4A	-1.1276	-0.813807	-2.95782	-2.46567	-3.0608	-3.55073
KDM4C	-0.414342	-0.0200234	0.275395	0.788327	1.73165	1.1182
KDM4E	0.0554869	0.126371	0.401648	-0.384885	-0.859526	0.827449
KDM5A	0.665644	0.52861	1.13615	1.68874	0.189432	-0.0760086
KDM5B	0.324646	-0.000239745	0.564315	0.865584	1.28434	0.548803
KDM5C	1.64554	2.16073	1.28795	0.977901	0.573957	-0.339609
KDM6A	1.49526	1.7209	1.4804	0.970014	1.82228	1.6992
KDM6B	0.620173	1.27456	0.775024	1.2396	0.399157	1.10192
KDM7A	0.958039	0.793774	-0.73465	-1.03059	-0.759975	-0.265312
KDR	-0.331925	-0.363527	0.265578	0.734307	0.922212	0.148891
KEAP1	1.17375	0.970403	2.70009	1.40279	2.43458	3.0536
KIF11	-1.79495	-1.95031	-2.66097	-2.92356	-2.9371	-3.3885
KIR2DL1	-0.201644	-0.367041	1.61263	1.90028	0.855323	1.6204
KIR2DL3	-1.27273	-1.34576	-0.000648556	0.490956	0.0627206	1.03778
KIT	0.00585689	0.310643	-0.326503	-1.11256	-1.49807	-1.29981
KLK1	0.230989	-0.374558	-0.40754	-0.438548	-1.4204	-1.79901
KLK14	0.991333	1.48192	2.0105	1.66472	1.43776	1.72776
KLK2	1.2385	0.960161	0.776066	1.23211	0.691819	0.000506537
KLK3	-0.223713	-0.36634	1.23122	1.13906	0.229999	0.55399
KLK4	0.121649	-0.202787	1.10866	1.08899	-0.234218	0.174025
KLK5	-0.981304	-0.927817	0.6105	0.267646	1.03533	0.567499
KLK6	-0.373344	-0.612039	1.41231	1.25067	1.13762	0.217971
KLK7	0.0608905	-0.113193	-0.303599	-0.190522	-0.467248	-0.572139
KLKB1	1.55143	1.58624	-0.00913891	-0.0329146	0.496254	-0.336826
KMO	0.815519	0.404501	1.50573	1.45669	1.19575	2.01975
KPNB1	-2.49689	-1.16677	-3.46622	-2.4826	-2.77607	-2.58875
KRAS	0.360052	1.25569	0.89058	0.215223	-0.173048	1.12594
LAP3	-0.188181	-0.197477	0.458093	0.879304	0.634079	0.383906
LATS2	1.32642	1.14216	2.45181	2.08641	2.09262	1.63387
LCK	0.024756	-0.0101087	0.682229	1.2622	1.27449	1.08287
LGMN	-0.453344	-0.302581	0.197104	-0.42081	0.591487	-0.208368
LIMK1	0.640006	0.66698	0.309984	1.13865	1.62707	0.818305
LIMK2	0.475861	-0.17176	-0.315339	0.0355954	0.725791	-0.204885
LINGO1	0.349206	0.138294	0.349038	-0.235463	1.09516	0.0924767
LIPE	1.7506	1.63323	1.88461	1.7816	1.19409	1.35986
LIPF	-1.29669	-1.36297	-1.6192	-1.90205	-2.58716	-2.20507
LIPG	0.599373	0.743755	0.99485	1.3397	0.307253	1.68515
LNPEP	0.0104018	0.0256189	2.41548	2.15341	1.3142	1.9302
LOXL2	0.309176	0.900883	1.3377	1.66847	1.67594	2.04262
LPAR1	0.494174	0.287883	0.74503	1.84149	1.69413	1.16937
LPAR2	0.237196	0.1167	-0.395673	-0.0909971	-0.762409	-0.18324
LPAR3	-0.512724	-0.212645	-0.6336	-0.86268	-0.940627	-1.03622
LPAR4	2.72206	2.53055	1.06812	1.14747	0.518881	1.28162
LPAR5	0.67133	0.360838	0.548428	-0.213168	0.210394	-0.282822
LRRK2	-0.969308	-0.525909	0.421738	-0.0173502	-0.888899	-0.789939
LSS	-0.430267	-0.483143	1.84068	1.97425	1.65095	1.77019
LTA	0.356658	0.815629	-1.12092	-0.161422	-0.884304	-1.4591
LTA4H	0.0949891	0.491189	-1.58945	-1.02542	-1.03734	-0.487087
LTB	1.20282	1.17749	1.66646	1.7775	1.69152	0.874001
LTB4R	0.458513	0.711066	-1.77656	-1.38318	-0.696501	-0.788577
LTB4R2	0.78299	0.834975	0.225204	-0.164201	-0.8287	-0.420688
LTC4S	0.998936	0.825935	1.67675	1.78188	0.562139	1.73364
LTK	-0.0273831	-0.335209	-2.51054	-1.60599	-1.27272	-1.90441
LVRN	0.799679	0.855812	-0.524535	-0.609178	-1.12614	-0.251193
LY96	0.180399	0.487003	1.97291	1.05765	0.754337	0.464269
LYN	0.502794	0.816555	0.817947	0.477017	0.991455	1.08803
MADCAM1	0.419111	0.253367	0.190152	0.556469	-0.522828	-0.464223
MAG	1.74105	1.75848	1.61002	1.96625	0.32201	1.07442
MAOA	-0.335333	-0.145015	-0.0401296	0.810363	-0.0979842	0.871572
MAOB	-0.863091	-0.226495	0.275854	-0.307591	0.263611	0.679557
MAP2K1	-0.0899907	-0.0847557	0.335262	0.573281	1.1711	2.4165
MAP2K2	0.432296	0.408496	1.08239	1.11811	0.950163	1.61529
MAP2K3	1.00123	1.17985	1.67354	1.21096	-0.43171	-0.633213
MAP2K4	-0.120565	0.0455096	1.68771	1.42087	2.64455	2.18795
MAP2K5	-0.11572	-0.276637	0.77357	0.471486	0.36749	0.219227
MAP2K6	-0.117293	0.138274	0.606789	2.36202	1.44976	0.327422
MAP2K7	0.571516	1.34345	-0.28153	0.304727	1.11702	1.14402
MAP3K1	0.281452	0.0621183	0.648382	0.535849	0.508014	0.792203
MAP3K10	0.0988146	0.26189	1.73226	2.38825	1.48519	1.8338
MAP3K11	1.6179	1.65186	2.40029	2.43469	1.8908	2.41286
MAP3K12	1.08223	0.904573	1.05096	1.06647	0.95076	0.464115
MAP3K13	0.894617	1.12988	2.12993	2.12384	2.19426	2.62912
MAP3K14	-0.214119	0.217045	0.139196	0.262704	-0.420301	0.272725
MAP3K19	0.027625	-0.483684	0.89094	0.463583	0.962735	1.22387
MAP3K2	0.560562	-0.197845	-0.535239	-0.769091	0.0767148	0.614758
MAP3K3	0.752965	0.614009	0.00703152	-0.665091	-0.141258	-0.0232947
MAP3K5	1.33412	1.75408	0.451296	1.31835	0.383678	0.396903
MAP3K6	1.36327	1.41669	0.500086	0.226619	0.665358	0.498707
MAP3K7	0.262774	0.346227	-1.27775	-0.733868	-1.81315	-0.703182
MAP3K8	1.4125	1.90199	0.352161	1.00016	0.655812	1.02838
MAP3K9	1.57577	0.965666	0.649096	0.179901	0.278126	0.0977953
MAP4K2	0.243449	0.195795	0.51715	1.73651	1.07611	0.795847
MAP4K3	0.686045	1.33854	1.67447	1.27544	2.07715	1.53578
MAP4K4	1.39727	0.894108	2.33075	2.27556	1.41123	1.31919
MAP4K5	0.562534	0.353511	-0.554505	-0.671377	0.593326	-0.449749
MAPK1	0.122392	0.128933	0.125337	0.124952	-0.239655	-0.206109
MAPK10	1.5165	1.51822	2.15469	1.86507	2.89334	1.74671
MAPK11	1.40809	0.95425	0.167207	0.454496	-0.575589	-0.361714
MAPK12	-1.02351	-0.850145	0.145133	0.718851	0.800625	0.627399
MAPK13	-1.76317	-1.70728	-1.37066	-1.72267	-0.75835	-2.49651
MAPK14	-1.564	-1.53472	1.02638	0.759888	-1.86725	-0.711392
MAPK15	0.237451	0.400996	-0.500428	-0.817856	-1.72766	-0.953909
MAPK3	1.56793	1.68574	1.32103	1.30425	1.58489	2.77235
MAPK7	1.29334	1.01258	-0.0478699	-0.501843	-0.315222	1.16512
MAPK8	0.624094	0.552967	0.105132	1.40548	1.02342	1.08637
MAPK9	0.115273	-0.162078	0.0842043	0.422891	0.827596	0.304903
MAPKAP1	-0.332213	-0.0896408	-0.222675	0.2015	0.478254	-0.709454
MAPKAPK2	-0.762354	-0.943346	-0.580976	-0.191062	0.211813	0.788253
MAPKAPK3	-0.635048	0.23869	-0.370068	-0.784857	-0.439737	-0.684979
MAPKAPK5	0.529837	0.522223	1.29678	1.38893	1.41846	1.06959
MARK1	0.727777	-0.0568099	-1.03002	-0.992817	-0.722855	-0.912002
MARK3	1.10308	0.337222	0.411981	-0.844832	-0.800318	-0.96974
MAS1	-0.0201587	0.136883	0.359167	-0.447286	-0.679136	0.445028
MAST3	1.20833	0.96162	-0.407367	-0.137783	0.177075	-0.286772
MAT2A	-1.10673	-1.5895	-1.89921	-2.11168	-1.45734	-1.67971
MBTPS1	-3.15209	-2.51585	-0.507911	-0.410639	0.832579	-0.247385
MC1R	0.0463253	-0.128231	0.151578	0.337195	-0.203044	0.0862636
MC2R	-0.282306	0.0374795	0.452593	-0.0875854	-0.351762	-0.0358824
MC3R	0.613937	0.574282	1.40629	1.45718	0.390855	0.959668
MC4R	-0.0401829	0.312301	-1.10838	-1.49631	-0.790363	-0.0179458
MC5R	1.35042	1.57415	2.13242	1.53914	1.45267	0.607873
MCHR1	-0.0244227	-0.0563003	0.368463	0.741641	1.12781	1.08203
MCHR2	-2.10339	-2.13804	0.390426	0.105862	0.332718	0.288541
MCL1	1.37582	1.0015	-1.58175	-2.14875	-2.11727	-1.81975
MDM2	0.197263	-0.101984	-0.715943	-0.927351	-0.917522	0.539358
MELK	1.65658	1.90297	0.156926	-0.126371	-0.240863	0.0330056
MERTK	0.587343	0.383832	0.667525	0.344453	-0.118704	-0.0763831
MET	-0.58032	-0.516468	-0.471767	-0.336127	-0.31474	0.715951
METAP1	-1.83065	-2.25346	-2.20142	-2.44858	-1.34242	-1.95252
METAP1D	-0.0883665	-0.223112	-0.843982	-2.37459	-1.92052	-0.373116
METAP2	-1.85667	-1.16724	-0.383677	-0.441726	0.0770875	0.0795746
MGA	1.44869	1.12985	0.436493	2.54852	2.46374	4.03595
MGAM	-0.909282	-1.25082	-0.396458	-1.34574	0.00209696	-0.201887
MGLL	-0.146011	0.286297	-1.51293	-0.70757	-0.699793	-1.34076
MINK1	0.0339415	-0.152283	0.575059	-0.00828602	-0.415887	-0.438701
MIP	-0.920446	-1.09323	0.513347	-0.18542	0.17603	-0.254626
MKNK1	0.412603	0.496508	-0.435909	-0.572046	-0.98953	-1.67411
MKNK2	-0.211917	0.250786	-0.750739	0.962643	0.635856	0.0271196
MLKL	-0.0294908	-0.0599454	1.10457	0.789057	2.31237	2.26933
MLNR	0.828096	0.0965467	0.406881	0.135019	-0.208421	-0.494857
MLST8	-0.0305018	-0.00984334	-1.72952	-1.01924	-0.348112	-0.0803648
MLYCD	-0.625256	-0.0855397	0.764283	0.866331	-0.655335	-0.460116
MME	-0.603967	0.100533	-1.24975	-0.2305	-1.43112	-1.44425
MMP1	-1.17772	-1.16656	0.945998	2.36561	1.81457	1.31903
MMP10	1.74825	1.07788	1.84382	1.38656	0.634184	0.820471
MMP11	-0.454142	-0.654625	0.266195	0.683719	1.03186	1.75777
MMP12	-0.0568627	0.577647	-1.74978	-0.293626	-0.925773	-0.855366
MMP13	0.378125	0.879569	1.52313	2.00646	1.47632	1.66085
MMP14	0.822657	1.1851	-0.223916	-0.46012	0.946175	0.653124
MMP15	0.977863	0.897549	1.74286	1.27366	3.96598	1.02396
MMP16	0.266947	0.340683	-0.846479	-0.61596	-1.33371	-1.45882
MMP17	-0.876559	-0.402608	-1.84178	-1.37951	-2.21037	-0.745714
MMP2	0.447545	0.349683	0.862668	1.71967	2.49704	0.783444
MMP25	1.21905	1.48215	1.3422	1.28752	0.504216	1.05055
MMP26	-0.0247086	0.0252821	-0.314815	-0.28965	-0.38752	0.492799
MMP3	-1.93809	-1.97751	1.53102	0.452259	-0.0994361	0.962017
MMP7	-0.780579	-1.49769	-0.223034	0.143816	-0.0222754	-0.355385
MMP8	-0.478743	-0.495136	0.303188	-0.549561	-0.269922	-0.109684
MMP9	-0.187194	-0.465304	0.927995	0.312884	0.904028	-0.0532912
MPI	0.205883	0.263161	-0.286657	-0.0789418	0.0178108	-0.0152939
MPO	-1.38789	-1.1126	-1.82255	-1.57329	-2.54129	-1.92333
MRPL34	-0.862035	-0.434348	-1.05969	-1.01963	-0.613328	-0.646165
MRPL45	-0.472946	-0.0564839	0.792618	-0.742387	-0.365969	-0.0601962
MS4A1	0.903311	0.560711	0.994195	-0.0852108	0.29079	0.257828
MSLN	-0.469844	-0.494883	0.753222	0.81859	-0.0817319	0.748372
MST1R	0.15557	-0.19489	0.417223	-0.617406	-0.208964	-0.924242
MSTN	-0.686455	-1.11833	0.197484	-0.00231585	0.75234	-0.742283
MTNR1A	0.900762	0.952091	-0.309864	-0.310837	1.1493	0.849212
MTNR1B	0.376206	0.0798685	0.445929	0.741823	0.72979	1.9058
MTOR	-2.49698	-2.04004	-2.85417	-2.4806	-3.92219	-5.72697
MTTP	-0.738007	-0.0229068	-1.02803	-1.47626	-0.730771	0.802203
MUSK	0.926157	0.5896	0.0706098	0.236079	0.205005	0.611337
MVK	-0.342533	-1.17938	-1.69839	-0.146266	-1.06763	-1.04545
MYLK	0.380614	0.779401	0.467576	0.60943	0.622465	0.60763
MYLK2	2.71606	2.2843	0.0920956	0.406688	1.9345	0.712134
NAAA	-0.466738	-0.172186	-0.691025	-0.852637	-0.131241	-0.0227062
NAE1	-1.05334	0.107584	-2.47776	-1.56647	-1.64583	-1.54503
NAMPT	-0.0256375	-0.0598306	0.545785	-0.584764	0.437639	0.573807
NARS1	-0.794307	-0.502836	0.588056	-1.10128	0.510065	0.186918
NAT1	-0.558079	0.136694	0.418753	0.248934	0.14961	-1.14878
NCOA1	2.42103	1.9583	1.06813	0.903262	2.15021	1.13977
NCSTN	-0.761061	-0.925319	-0.247783	-0.485238	1.72406	-0.111143
NDC80	0.536022	1.57419	-4.40006	-3.47162	-2.68824	-1.49282
NDUFA1	-0.836507	-1.09532	-2.26368	-2.45787	-2.5762	-2.17625
NDUFA10	-2.19443	-2.2573	-1.3255	-0.211693	0.252512	-0.0137482
NDUFA11	-0.95721	-0.972726	0.811395	0.373306	0.955186	3.32179
NDUFA12	0.566208	0.515718	-1.67672	-0.84339	-1.08029	0.166699
NDUFA13	-0.700104	-0.24586	-0.825706	-1.03027	0.0158155	-0.10995
NDUFA2	-1.58963	-1.25194	-1.78478	-1.62579	-1.88904	-2.64524
NDUFA3	0.623741	0.853432	0.742841	0.581285	0.202034	0.688059
NDUFA4	0.24572	-0.315144	-0.081656	-0.133881	0.331812	-0.855246
NDUFA4L2	-0.93003	-0.176583	-1.38557	-1.20169	-0.88174	-0.779767
NDUFA5	-0.546547	-0.971994	-1.34311	-1.52111	-0.845908	-1.43352
NDUFA6	-2.59401	-2.47225	-1.83479	-1.62674	-0.824999	-0.898166
NDUFA7	-0.146165	0.185352	0.983232	1.18827	1.52535	0.931248
NDUFA8	-0.641356	0.375137	0.0900199	0.421427	0.29174	-0.00791127
NDUFA9	-1.97657	-2.16675	-0.206124	-1.93038	-1.23403	-1.19836
NDUFAB1	-1.73797	-2.30945	-3.38759	-4.02204	-2.92926	-3.28973
NDUFAF1	-1.54851	-1.4538	-0.792011	-0.334729	-1.0071	-1.30097
NDUFAF2	-0.0855362	-0.0315489	0.57527	1.00454	-1.08	0.703956
NDUFAF3	0.669055	-0.385178	-1.1415	-1.56377	1.56612	-0.131279
NDUFAF4	-0.101728	-0.785027	0.214369	0.199722	1.4616	1.03405
NDUFB1	0.0840615	-0.126066	0.282613	0.440103	0.343905	0.945374
NDUFB10	-1.33598	-2.12884	-2.36903	-2.4028	-1.60199	-0.721046
NDUFB11	-1.64573	-1.92278	-1.11671	-0.210769	0.109489	-0.48277
NDUFB2	-1.92968	-0.733669	-1.75836	-2.66135	-1.61955	-0.722588
NDUFB3	-0.578482	-0.322537	-0.343643	0.179954	-0.545659	-0.171335
NDUFB4	-1.67765	-2.61019	-1.8502	-2.05035	-1.47136	-1.31481
NDUFB5	-0.846049	-0.444431	-1.34548	-1.44057	-0.457456	-1.94719
NDUFB6	-1.41573	-0.71808	-2.83038	-3.30923	-1.63899	-1.60309
NDUFB7	-1.4753	-1.80005	-1.28559	-1.43808	-1.24532	-1.08185
NDUFB8	-0.161723	0.620156	0.645701	-0.392234	0.217726	1.62383
NDUFB9	-0.717327	-0.417364	-2.16287	-1.45872	-1.78187	-1.62078
NDUFC1	0.210791	0.234393	-0.860759	-0.657395	-2.17391	-0.897802
NDUFC2	-0.418617	0.0652227	0.738865	1.3473	1.85292	2.02364
NDUFS1	-1.91303	-1.68703	-1.46098	-1.67001	-0.536699	-0.462057
NDUFS2	-1.94141	-2.8011	-2.37066	-2.62706	-2.0868	-1.48101
NDUFS3	-0.157179	-0.710216	-1.80709	-1.57528	0.0760849	-1.03984
NDUFS4	0.509681	0.816744	0.619287	0.11283	-1.31607	0.353731
NDUFS5	-1.07716	-2.00261	-1.77064	-2.25729	-1.52808	0.0386276
NDUFS6	0.012494	0.174885	0.451707	0.0353379	0.898916	-0.487268
NDUFS7	0.642494	0.598997	0.399737	0.903948	1.11563	0.679902
NDUFS8	-1.43234	-1.7196	0.573003	0.0802941	1.0177	1.79761
NDUFV1	-1.94816	-2.04329	-2.1346	-2.88172	-0.57866	-0.702572
NDUFV2	-1.45817	-0.747213	0.451284	0.921086	0.186563	-0.176855
NDUFV3	-0.307186	-0.197106	-0.267342	0.208426	0.450239	-0.198007
NEK1	-0.0993422	-0.460486	-0.54999	-0.87877	0.453049	-0.484942
NEK11	0.145558	0.150836	-0.310085	-0.0143248	0.147915	-0.30374
NEK2	-1.00681	-1.6171	-1.01516	0.0886177	0.00699553	-1.74664
NEK3	0.656241	0.849891	-0.438318	0.190721	0.116132	-0.056915
NEK6	-0.61055	0.0858173	0.540721	0.860921	1.27216	1.10202
NEK7	-1.0747	-1.42256	1.87254	1.51875	2.2661	1.46514
NFKB2	2.00523	2.47284	2.94699	2.44027	2.63856	2.96368
NGF	-0.418495	0.0846479	-0.475686	-1.38132	-1.40068	-0.389962
NGFR	0.292756	0.148678	-0.458702	0.337283	0.606579	0.496246
NLK	-0.0451901	0.684425	-0.120112	0.47818	-0.458303	-0.352064
NLRP3	-0.671163	-0.637697	-0.0513571	0.110163	-1.17344	0.0678797
NMBR	1.01361	0.701453	0.880416	1.04854	0.54152	0.804362
NMUR2	0.547112	0.219252	0.917333	0.733563	-0.336963	1.16014
NOD1	0.15201	0.536532	0.44431	0.557081	-0.322996	-0.224443
NOD2	0.839299	1.03553	1.16893	0.380554	0.66912	0.465523
NOL9	-3.01665	-2.18	-0.703665	-1.80096	0.0597174	-1.70711
NOS1	0.441763	0.336448	0.206992	1.20694	1.80767	0.87795
NOS2	1.33136	0.839959	0.444193	0.278426	-0.228477	0.046246
NOTCH1	1.10211	0.638821	0.628651	0.585927	0.806726	0.347485
NOTCH2	1.73789	1.80743	1.53027	1.5003	1.26839	1.90441
NOTCH3	0.665829	-0.201305	1.42286	0.541189	1.62618	0.746871
NOTCH4	0.0690536	0.955247	1.01485	0.830886	0.939767	0.115614
NPC1L1	0.864895	0.158322	-0.268285	0.405306	-0.509715	0.539293
NPEPL1	1.09085	1.29356	1.29488	1.49187	0.910415	1.66407
NPEPPS	-0.399361	-0.793622	1.04273	0.808842	0.590712	0.209176
NPFFR1	0.918658	0.683933	0.916259	0.714277	0.649009	0.484496
NPR2	0.847771	0.179872	0.923088	0.303219	1.0102	0.771038
NPR3	0.392273	0.487987	-0.829894	-0.266216	-1.82581	-0.933933
NPY1R	1.23333	1.52432	1.36277	0.306144	1.80726	1.32055
NPY2R	-1.16603	-1.00449	-0.403371	-0.955673	-2.42425	-1.79198
NPY5R	0.0618881	0.912042	-2.38528	-1.86197	-2.47666	-1.49524
NR1D1	0.595345	0.315123	2.06983	0.837955	-0.104934	0.641808
NR1D2	0.343028	0.052351	-0.827916	-1.67748	0.0294115	-0.673463
NR1H2	-0.155487	-0.246264	-0.0862285	0.255667	-1.49046	-0.491407
NR1H3	1.17395	1.10207	2.41187	1.51818	1.13949	0.947565
NR1H4	0.627288	0.513277	0.77477	0.83366	0.960941	-0.913155
NR1I3	0.3188	0.672665	0.606802	0.518396	1.02801	0.616159
NR2E3	0.535345	0.636092	0.13543	0.20765	0.0668683	0.35637
NR3C1	-0.395886	-0.254505	-0.36514	0.224705	0.552735	0.548263
NR3C2	-0.417425	-0.28923	0.876678	0.993472	2.07957	1.88667
NRAS	-1.38037	-0.789971	-0.901394	-0.681326	-2.77631	-1.08211
NRF1	-1.43148	-1.72033	-2.53309	-2.41524	-3.35795	-2.99123
NRP1	-0.412109	-0.324285	-0.0642907	0.388978	-0.261953	0.217172
NT5E	-0.0784351	0.0320805	2.60779	2.07908	2.35103	2.50908
NTRK1	-0.3405	-0.533604	-0.572702	-1.82921	-0.979497	-1.64927
NTRK2	0.658682	0.045257	0.186383	-0.54963	1.32963	0.340794
NTRK3	0.549835	0.386268	1.71741	1.11394	1.23795	0.818295
NTSR1	0.846311	0.317297	-0.55645	-0.421579	-2.00955	-0.764274
NUAK1	0.576881	1.13175	0.670545	0.696903	0.806929	0.657145
NUCB1	-0.460245	-0.95576	0.367544	0.602594	-1.4245	0.365916
NUP85	-2.95861	-3.99869	-0.622392	-0.364524	-2.63653	-1.70643
ODC1	-0.511279	-0.229976	0.0431909	0.444442	0.385995	-1.00568
OPRD1	0.842688	0.472738	-0.717159	-0.716453	0.0163661	-0.100758
OPRK1	0.73495	0.808635	1.47026	1.18953	0.0377668	0.985639
OPRL1	0.900969	0.93477	-0.112422	0.302444	0.794933	1.57603
OPRM1	-0.5978	-0.525063	0.351431	0.0837757	-0.289415	0.209535
ORAI1	2.15918	2.36864	1.1179	0.709987	1.2794	0.717684
OSGIN2	0.503532	0.618545	0.274833	-0.0320273	-1.38214	-0.148511
OXER1	0.464994	0.306282	0.98174	1.68454	3.03641	1.74914
OXSR1	0.272242	0.602221	1.1144	0.671015	0.437964	0.959536
OXTR	-0.0466204	-0.234819	-0.551915	0.233562	-0.452117	-0.598659
P2RX1	0.0121972	0.169643	-0.372871	0.00248678	-1.56597	0.524325
P2RX2	0.697691	0.441038	0.873612	-0.0666881	0.748812	1.00795
P2RX3	-0.345061	-0.542554	-0.448511	-0.172634	-1.85438	-0.816806
P2RX7	-0.409339	-0.352003	-0.323828	-0.542976	-0.247516	0.264685
P2RY1	-0.269102	-0.027222	-0.303198	1.3783	0.299105	0.747398
P2RY10	2.07894	1.64674	2.00744	1.30421	0.36413	1.73842
P2RY11	0.513128	0.786292	0.190714	-0.453915	0.742031	0.601547
P2RY12	0.0502717	0.0130125	0.705455	0.397375	0.662587	-0.623378
P2RY13	0.414118	0.759751	-0.783656	-0.965076	-2.00422	-1.71463
P2RY14	-1.37844	-1.01752	-0.295617	0.00441786	-0.717737	-0.585771
P2RY2	0.246512	0.462219	1.53263	1.4115	1.8303	0.970251
P2RY4	1.09142	1.39078	0.45656	-0.0134047	0.0906391	0.313696
P2RY6	1.30593	1.56608	-0.144062	0.311041	0.0466715	-0.410591
P4HB	0.0526734	-0.252733	1.11425	1.04304	0.711048	-0.00912405
P4HTM	0.102217	0.340637	-1.01491	-1.29724	-1.54013	-0.596239
PADI1	0.78414	0.757745	-0.62937	-0.991807	-1.14192	-0.239377
PADI3	-1.69917	-1.31915	-0.766245	-0.0108515	-1.51394	-1.12178
PADI4	0.638876	0.901011	0.693373	0.93708	0.132047	0.278825
PAH	0.015479	0.253785	-0.177892	0.1701	-0.931322	-0.40985
PAK1	-1.57126	-1.28125	0.0925245	0.879326	0.158597	0.387029
PAK2	-0.861718	-0.486203	-3.55909	-2.77389	-2.74711	-2.34
PAK3	0.773962	0.676639	1.39908	1.74684	0.867878	1.69433
PAK4	1.82528	1.78126	2.04645	1.23333	1.5617	1.69122
PAK6	0.32428	0.458599	0.746432	0.768816	1.76305	1.16169
PANX1	1.38789	1.46693	1.32706	0.516297	1.57486	0.801301
PANX3	-0.00913791	0.200071	0.17128	0.403139	-0.258538	-0.241021
PARP1	0.827474	0.80042	0.228893	0.932645	0.0756764	-0.281719
PARP2	-0.0591636	-0.360721	0.242753	1.06861	0.983742	1.29185
PARP3	0.407668	0.3905	-1.31423	-0.231184	-1.30491	-0.0892515
PASK	-0.0495822	0.731161	0.00250985	0.0947879	0.861494	1.33747
PBK	0.568764	0.641963	0.469125	-0.411776	1.73413	2.34175
PBRM1	-0.00136156	-0.258766	-0.338758	-0.334832	-0.506187	-0.364128
PCSK1	-0.214063	-0.312717	-0.263082	-0.351612	-0.106529	-1.45367
PCSK2	0.607777	0.0744582	0.765751	0.11163	0.119069	0.784486
PCSK4	0.769113	0.522204	0.589087	0.551875	-0.392083	-0.371282
PCSK5	-0.243516	0.104554	-0.188282	-0.325513	0.50571	0.140323
PCSK6	0.900725	1.14913	0.149972	0.283305	-0.214809	0.492639
PCSK7	0.46426	0.771204	0.0148787	0.16583	0.646788	1.59535
PCSK9	0.202874	-0.365907	0.640751	0.518911	0.415765	-0.362827
PDCD1	0.508714	0.660551	0.816182	1.51643	2.3774	1.85019
PDE10A	-0.120152	-0.226913	-1.10416	-0.726866	-1.01095	-1.79914
PDE11A	0.215372	0.463032	0.427563	1.02437	-0.0635425	0.621912
PDE1A	2.96135	3.04641	1.8933	0.273637	0.840471	1.59104
PDE1B	-0.257971	-0.718931	0.511221	0.061378	2.05583	0.762926
PDE1C	0.286372	0.0127412	-0.507512	0.0789758	-0.142588	-0.327879
PDE2A	-0.23462	0.81643	2.08572	2.2113	1.13651	1.29593
PDE3A	0.535077	0.556247	0.155219	0.76604	0.950499	1.22821
PDE3B	0.0400523	-0.498186	-0.231265	-0.0535338	-1.64237	-1.08246
PDE4A	-0.0794587	0.052124	0.646678	-0.555785	0.093942	0.992831
PDE4B	-0.205632	-0.605269	0.798218	-0.104263	0.384678	0.673169
PDE4C	0.245242	0.0903743	0.205062	-0.00176463	-0.64241	0.266261
PDE4D	-0.180907	-0.0829098	0.619536	0.643984	0.418216	0.809291
PDE5A	-0.353237	0.0503947	-0.0859787	-0.513717	-1.14043	0.595769
PDE6A	1.56134	0.931383	1.02314	1.55831	0.836453	1.0816
PDE6B	-0.478279	-0.144611	0.11814	0.872978	0.672203	1.04685
PDE6C	-1.37042	-1.97765	-0.530947	-0.441242	0.570919	-1.4009
PDE6D	1.3517	2.0384	-0.0470215	0.241743	-0.124737	1.57688
PDE6G	0.856682	1.17191	-0.877543	-0.884653	-1.33594	0.271837
PDE6H	0.649266	0.175276	0.65205	1.26394	0.861656	0.41841
PDE7A	-1.62067	-1.57831	0.158464	0.0817381	0.850669	0.521947
PDE7B	-0.177466	0.00806621	-0.724938	-1.7433	-1.21268	-1.21787
PDE8A	-1.84557	-1.94716	0.359405	0.272147	1.6809	1.09777
PDE8B	1.51458	1.16685	1.5061	0.614417	0.363361	0.211035
PDE9A	0.712363	1.34716	0.715237	0.802777	0.221875	2.2405
PDGFA	0.819614	0.843698	1.91871	1.39805	1.20837	2.0296
PDGFB	1.09791	0.895012	2.27228	1.10912	0.699702	1.48885
PDGFC	0.383954	0.888721	0.0104759	0.234919	0.837394	0.343205
PDGFD	0.136068	-0.760303	-0.347379	-0.952374	-0.511725	-1.37518
PDGFRA	0.997352	0.778541	1.54765	-0.311499	0.992644	0.59608
PDGFRB	0.503995	0.52779	-0.32815	-0.462781	-0.539222	-0.768423
PDK1	0.474118	0.274524	1.55779	1.59595	0.769386	2.88591
PDK2	-0.392422	-0.830599	-0.034355	0.269626	-1.76347	-0.411182
PDK3	1.34083	0.887375	-0.149455	0.614403	0.673586	0.314059
PDK4	1.22992	0.487101	1.6612	1.87414	0.645652	2.80982
PDPK1	-1.31688	-1.03811	-0.595487	-1.38135	-2.30871	-1.44554
PDRG1	-1.67	-1.77369	-2.76639	-3.37834	-2.93649	-2.27278
PFKFB3	-0.420404	-0.460619	-0.199507	-0.813174	0.437905	-0.863073
PGA5	-0.365527	-0.860464	-1.11546	-0.816271	0.0953018	-0.735173
PGC	0.515406	0.485446	0.0490033	-1.36122	-1.76483	-0.210634
PGF	-0.0344732	0.0962082	1.42136	0.811662	1.02981	1.96112
PGR	-0.156008	-0.576605	-0.00212031	0.0103981	-0.106819	0.195638
PHF8	-0.284658	-0.74407	-2.17503	-1.9262	-1.06483	-2.72371
PHKG1	-0.337488	-0.270643	1.03527	0.349424	0.810144	-0.242281
PHKG2	0.0461152	0.164651	0.499604	0.419161	1.21677	0.689183
PI4K2A	-1.28165	-0.920656	0.701719	-0.76677	-0.910058	0.701443
PI4K2B	1.01541	1.4466	1.64841	1.87673	0.930245	0.84897
PI4KA	-2.79128	-2.6984	-0.979703	-0.92371	-1.54791	-0.435359
PI4KB	-0.613174	-0.208041	-0.679171	-0.372365	-0.697576	0.790832
PIK3C2A	-1.5336	-1.47246	-0.587861	-0.772232	0.794854	0.282063
PIK3C2B	-0.342603	-0.35347	-0.408552	0.222289	0.0848909	-1.02458
PIK3C2G	0.705669	-0.127929	0.436222	0.116215	-0.785074	0.730686
PIK3C3	-1.22286	-2.34304	-2.44538	-1.22593	-1.00947	-1.29597
PIK3CA	0.946268	1.55409	-0.549004	0.565885	-0.0988167	-0.856227
PIK3CB	0.31052	0.0700179	-0.55655	-0.981762	-1.2877	-0.333046
PIK3CD	0.484605	0.507557	-0.254325	0.300198	0.839572	0.898945
PIK3CG	0.640604	0.623724	0.563975	0.504691	0.517046	2.79026
PIK3R1	-0.655417	-0.752535	0.531347	0.199302	-0.286944	0.190576
PIK3R2	0.495945	-0.0901711	-0.209289	0.313264	-1.30358	-0.558284
PIK3R3	0.266989	-0.346939	0.396278	-0.560151	1.27476	-0.0896906
PIK3R4	-0.893661	-0.858545	-0.668171	-1.10351	-0.911082	-0.392628
PIK3R5	1.34761	1.65332	0.451412	0.379805	0.212252	1.07169
PIK3R6	-0.886631	-0.193134	-0.304489	-0.24022	0.0462621	0.227384
PIM1	1.70931	1.39577	0.210114	0.0676129	0.283659	-0.288852
PIM2	1.70086	1.89184	-0.697913	-0.372757	-0.99293	-0.310389
PIM3	1.75569	1.67831	1.08795	1.04075	1.59173	1.13143
PIP5K1A	0.280613	0.675062	-0.938016	0.224308	-0.716975	-1.55773
PKMYT1	-2.68861	-2.65177	-3.22416	-2.4625	-1.91838	-2.57649
PKN1	1.29463	1.52943	0.801234	1.29389	1.09581	0.866298
PKN2	0.587542	0.35313	-1.95331	-0.506036	-3.64005	-0.672084
PKN3	0.262972	0.401065	0.341652	0.648674	0.137393	0.100216
PLA2G10	-0.507682	0.0268511	-2.42412	-1.34637	-0.249286	-1.87389
PLA2G1B	0.183091	0.0146025	1.75186	0.887559	1.29199	1.76502
PLA2G2A	-1.38363	-1.02434	-0.0758693	-0.174481	-0.507192	0.418872
PLA2G2E	0.504276	0.380682	1.35533	0.744779	0.652238	0.695149
PLA2G4A	-0.170912	0.00658924	-0.345627	0.0749318	0.0870653	0.805738
PLA2G5	0.265441	0.0988039	0.35624	-0.193108	1.06335	-0.499587
PLA2G7	0.395303	0.0789271	1.60173	1.66774	0.951355	2.78686
PLAT	-1.03688	-0.776703	-0.0420788	-1.09444	0.165777	0.128683
PLAU	-0.44871	0.518548	-0.18239	0.126744	-0.383086	1.35758
PLCG2	1.10628	1.04518	0.738569	0.471341	1.84593	0.189742
PLD1	-0.0200444	-0.344834	0.420283	0.126496	-0.570054	0.0849556
PLD2	1.20223	0.843815	0.392034	0.160281	0.89151	0.621016
PLG	0.485441	1.29073	1.39267	2.17404	2.5299	2.00352
PLK1	-1.13942	-1.80352	-3.29944	-4.0285	-4.07613	-4.24662
PLK2	0.815257	0.297277	0.572894	1.08696	0.49118	1.19379
PLK3	0.51826	0.832631	0.766745	1.09799	-0.540695	1.04434
PLK4	-4.27206	-4.04078	-3.03834	-2.30577	-1.6556	-2.25237
PMPCA	-2.62318	-3.0018	-3.58356	-2.67805	-2.15741	-1.7879
PMVK	-2.10556	-2.81398	-0.944737	-1.0693	-0.700843	-1.34354
PNLIP	-0.852389	-0.473988	-0.184095	0.238471	-0.158827	-0.367999
PNMT	-0.152663	-0.750576	0.271867	-0.49298	0.0541322	-0.68284
PNP	0.619547	0.395944	1.40446	1.18397	1.02207	1.47146
POLA1	-0.982688	-0.0200698	-0.868666	-1.1114	-2.37767	-1.75952
POLD1	-0.871646	-0.937751	-0.724425	-1.36934	0.100814	-0.343861
POLE	-2.16888	-2.63963	-2.02402	-2.70999	-2.18648	-1.37179
POLR1B	-1.52861	-2.3226	0.557008	0.141221	1.84675	0.277469
POLR2C	-1.95342	-2.64637	-1.58618	-1.75639	-0.332098	-1.15391
POLR2L	-4.29765	-2.74635	-2.29494	-3.60426	-1.90696	-2.85396
POLR3A	-1.85541	-1.11656	-3.24179	-2.5392	-4.62148	-2.16363
POLR3H	-2.91982	-3.02732	-3.1049	-3.58193	-0.087227	-2.88024
POLR3K	-3.94303	-3.53027	-2.77354	-1.39672	0.362894	-0.161456
PPARA	-0.258542	0.303708	-0.238137	1.01624	-0.184781	0.464605
PPARD	-0.0205032	0.12435	-1.35636	-0.600207	-1.36812	-0.113781
PPARG	0.808524	0.523752	0.0474229	1.02977	0.152486	0.11356
PPAT	-0.340209	-0.268218	-0.283617	-0.134924	0.43384	-0.400563
PPIA	0.0405718	0.872724	-1.10267	-0.975065	-0.967503	-1.99704
PPME1	-0.358908	-0.727038	-0.421461	0.044437	-0.698497	0.374316
PPWD1	-0.951453	-0.392968	-1.66197	-2.9547	-2.13092	-1.38089
PRCP	-1.4235	0.0260203	-0.0713248	0.954782	0.624618	0.984029
PREP	0.0945148	-0.297931	-0.587862	-0.763026	-0.948026	-1.25995
PRKACA	-1.17424	-0.934939	-0.120814	-0.510118	0.209481	-0.588748
PRKACB	-0.630259	-0.544716	-1.78787	-1.45243	-2.62466	-1.38533
PRKACG	-1.12086	-1.33833	-0.728174	-0.666911	-0.619208	0.425458
PRKAR2B	1.1361	1.51652	0.972982	0.370616	0.181103	0.421845
PRKCA	-1.19874	-1.90465	-0.247843	0.685867	0.891666	0.333223
PRKCB	-0.720487	-0.770945	0.664413	0.931058	0.434196	-0.869689
PRKCD	0.265977	0.637285	1.22623	1.80835	0.548485	-0.974843
PRKCE	0.404198	1.22403	-0.0622512	0.411175	-0.286669	-0.371734
PRKCG	-0.246147	0.54885	1.16633	0.828527	-0.350861	-0.127895
PRKCH	0.492291	1.03242	0.359211	-0.208687	-1.27301	-1.21087
PRKCI	-0.573535	-0.0921483	-1.32701	-0.713582	-1.75514	-2.2967
PRKCQ	0.157417	0.00961783	0.00753605	0.250044	0.304244	-0.380622
PRKCZ	1.67319	2.01319	0.0340576	-1.02408	-0.494861	-1.34064
PRKD1	0.337091	0.177997	-1.00252	-0.112457	0.895316	-0.967776
PRKD2	-0.608343	-0.990725	-0.0243071	0.163067	0.137341	-0.147882
PRKD3	1.17615	0.844887	0.321951	0.573096	-1.32464	-0.0407539
PRKDC	-1.49347	-1.7663	-2.52509	-1.06714	-1.67839	-1.52917
PRKG1	-0.878627	-0.101629	-0.978714	-1.09604	-1.11343	-0.16161
PRKG2	0.516338	0.636706	-1.17423	-0.0141977	-0.620524	-0.666886
PRKX	0.449782	0.13325	1.40834	1.34795	1.58198	1.74745
PRLHR	0.923273	0.727153	1.10888	0.48777	0.180734	-0.0244054
PRMT1	-5.4286	-3.77447	-3.45496	-5.30008	-4.93536	-5.31679
PRMT3	0.363166	0.313053	0.501485	0.565567	0.711849	0.635822
PRMT5	-1.19366	-2.04658	-2.60201	-1.45967	-1.6003	-1.1458
PRMT6	-0.304354	-0.0551928	-0.772097	-0.388204	-0.978745	-1.00984
PRMT7	-0.990811	-0.838457	-0.311924	-0.989059	-0.759785	-1.1198
PRMT8	0.874046	1.35795	0.512418	0.277202	0.336165	0.481361
PROC	-1.82433	-1.36179	-2.14158	-2.74706	-1.15832	-2.64837
PROKR1	-1.81838	-1.49846	0.623057	0.911202	-0.161764	0.510102
PROKR2	0.584045	0.59687	1.04291	0.701052	0.107537	-0.145655
PRPF6	-1.05986	-0.972194	-2.92403	-2.04507	-0.601556	-0.380733
PRRT2	0.203788	0.866785	0.878709	0.0793211	-0.0435472	0.131795
PRSS1	-0.541499	-0.649411	0.588409	0.866417	0.171632	1.04845
PRSS3	-0.154896	0.0619682	-0.041519	0.38454	0.836121	1.4698
PRSS8	0.629603	0.603775	1.25191	1.29737	0.977665	0.769339
PRTN3	0.344599	0.520769	0.739077	1.61645	1.67131	1.48406
PSEN1	-0.116399	0.164514	-0.197181	0.034772	-1.04713	-0.331306
PSEN2	0.80891	0.882038	-0.461697	1.02047	-0.355431	-0.567919
PSENEN	1.69115	1.58257	0.997442	0.985374	0.622492	0.150127
PSMA1	-1.18524	-1.074	-2.17844	-1.94736	0.28992	-2.38423
PSMA2	-3.64585	-2.77488	-3.52619	-5.30515	-4.19666	-4.00025
PSMA3	-1.6097	-1.56231	-3.29607	-4.34714	-3.80889	-5.46728
PSMA4	-0.374408	-0.997054	-0.366545	-1.35799	-2.14611	-1.69767
PSMA5	-2.37658	-1.82029	-4.14031	-3.7862	-2.52011	-3.6049
PSMA6	-4.44135	-2.76255	-5.82639	-6.22896	-6.35388	-4.68972
PSMA7	-2.21682	-2.20012	-1.92568	-1.86145	-1.74962	-2.6458
PSMA8	0.300577	0.276323	-0.237108	-0.242185	1.51684	0.70744
PSMB1	-1.93165	-2.26668	-2.28964	-2.69638	-2.76647	-0.567103
PSMB10	0.15791	0.445704	0.000149828	-0.0112005	-0.176108	-0.831807
PSMB11	1.89848	1.1351	0.132938	0.682903	-0.0389562	0.400033
PSMB2	-0.840317	-0.673328	-1.3995	-2.53939	-1.60203	-1.4757
PSMB3	-4.00755	-2.90846	-5.80258	-4.53817	-4.26422	-4.72859
PSMB4	-1.67094	-1.76156	-5.35268	-4.183	-5.22565	-5.13007
PSMB5	-1.41244	-0.844735	-1.77971	-2.01644	-1.36003	-2.58201
PSMB6	0.147558	-0.424293	-0.769333	-0.363123	0.318653	-0.314197
PSMB7	-0.565403	-0.406012	-3.1411	-1.09452	-1.46124	-1.66787
PSMB8	0.500418	0.292909	0.61395	0.424602	1.32519	0.102508
PSMB9	0.581933	0.669375	0.588722	1.50628	0.443609	1.16799
PSMC1	-1.76925	-1.56207	-3.12776	-3.53257	-4.26317	-2.47661
PSMC2	0.0167201	-0.0954028	-1.54721	-1.91959	-1.8063	-1.74559
PSMC3	1.99457	0.782894	-0.8219	-0.269905	-0.97932	-0.377345
PSMC3IP	-0.00925054	-0.789994	1.28349	0.491514	-0.468109	0.580144
PSMC4	-0.950348	-0.60559	0.204623	-0.484453	-1.06438	-2.06149
PSMC5	-2.83778	-2.38173	-1.38637	-1.59366	0.628784	-0.154058
PSMC6	-1.99389	-1.44417	-3.56386	-4.30165	-2.47409	-3.43277
PSMD1	-1.12665	-0.772165	-2.00876	-2.34469	-1.30455	-1.93639
PSMD10	1.08394	0.196626	1.04895	1.36681	1.27137	1.39069
PSMD11	-0.475693	0.0842889	-1.45254	-2.55457	-1.84613	-2.12154
PSMD12	-2.01707	-2.23248	-2.461	-2.55894	-1.83577	-1.40353
PSMD13	-1.01416	-0.803928	-2.92153	-2.46686	-1.77739	-2.75885
PSMD14	-0.76733	-0.176728	-6.55392	-6.6028	-6.9497	-7.70482
PSMD2	-1.05682	-2.24847	-2.19851	-1.99821	-1.52421	-1.02499
PSMD3	-2.91761	-2.57402	-3.75958	-4.51495	-5.55006	-4.2973
PSMD4	-2.07968	-1.8047	-1.41329	-0.903166	-0.0787765	-0.772192
PSMD5	0.977294	1.08662	1.61022	0.954293	1.01487	1.48048
PSMD6	-2.76275	-2.30989	-3.32434	-5.25646	-4.37936	-3.7535
PSMD7	-1.60627	-2.03876	-4.23123	-5.08628	-4.47884	-2.44284
PSMD8	-4.01903	-3.89301	-2.80929	-2.51874	-1.75717	-1.98706
PSMD9	1.2901	1.15901	0.379487	0.125462	0.502601	-0.385496
PSME1	0.820148	0.926087	-0.066617	0.558831	0.118479	0.604507
PSME2	-0.169356	-1.25691	0.794314	0.498037	-0.318968	-1.184
PSME3	-1.51685	-1.5745	-1.41397	-1.71254	-1.05787	-1.14247
PSME4	0.876112	0.323111	0.661616	1.33054	0.854777	0.684427
PSMF1	1.87905	1.50789	2.37924	1.43301	1.43882	3.18954
PTAFR	0.816913	0.383383	-0.790055	-1.63139	-0.523605	-1.94255
PTCH1	1.54007	0.997211	-1.19326	-0.210824	-0.257899	0.89781
PTEN	0.0923508	0.411771	-0.196117	0.176491	1.26825	0.940865
PTGDR	-1.8942	-1.94897	-0.991299	-0.621021	0.0759281	-0.396877
PTGDR2	0.496937	0.58458	-0.165582	-0.236907	1.1353	-0.859882
PTGER1	-0.341591	-0.179516	-0.560812	-0.219027	-0.772055	0.353782
PTGER2	1.54552	1.1657	2.61746	1.60081	1.5154	2.45375
PTGER3	1.1638	0.332833	-1.42697	-0.991658	-0.764627	-2.01561
PTGER4	0.49758	-0.119443	0.981261	0.415986	-0.399293	-0.712902
PTGFR	-0.0194653	0.12524	-1.41693	-0.950582	-1.31607	-1.29213
PTGIR	0.795557	0.903314	1.72561	2.1414	2.21074	1.88213
PTGIS	1.757	1.23049	1.22156	1.20639	2.37399	1.19581
PTGS1	0.390809	0.25157	0.383407	0.663212	0.796799	0.806196
PTGS2	1.38421	0.800714	2.33397	1.98596	2.21132	0.642813
PTH2R	0.77838	-0.343136	-0.276109	-0.469014	-1.13255	-0.249794
PTHLH	0.415221	0.703461	1.64569	1.38077	1.87375	2.01896
PTK2	-1.48391	-1.45423	-0.67769	-0.118005	0.33789	0.279994
PTK2B	-0.944598	0.0585415	-0.417777	-0.310551	0.2451	0.426694
PTK6	1.01902	0.764019	-0.0919886	-0.0256377	0.567142	-0.367659
PTPMT1	-0.479513	-0.499405	-2.65524	-2.2189	-2.2977	-0.512433
PTPN6	1.02583	1.2923	1.46368	1.36018	1.01737	1.94761
PTPRF	-0.687252	0.204679	0.150523	0.125307	-0.303641	-0.447925
PTPRG	-1.39297	-0.908445	-0.973671	-2.35212	-0.734104	-0.514443
PTPRM	0.285664	0.279748	0.590235	0.565807	-0.854045	-0.78414
PTPRS	0.254101	0.743834	0.0590508	-0.129953	0.778617	0.546135
PYGB	0.962717	0.359801	0.417862	0.854027	0.877806	-0.184198
QPCT	0.387801	0.641262	1.07117	0.804985	2.83991	1.62472
QRFPR	2.00036	1.75041	1.75064	2.15592	2.09962	1.58992
RAB27A	0.89307	0.782802	1.11313	0.803271	1.39834	0.989107
RAD51	-4.18256	-3.66094	-1.33419	-2.17028	-2.2349	-1.16431
RAF1	-1.54631	-1.62012	-0.66562	-0.697693	-0.269626	-1.25099
RAMP3	-1.09185	-0.703919	0.448442	0.22226	-0.164702	-0.187091
RAN	-1.06844	-1.87086	-3.488	-4.31399	-3.53313	-4.36953
RAPGEF3	-0.499635	-0.333488	0.177159	0.290529	-0.883618	-0.65304
RAPGEF4	-0.522154	-0.0743587	-0.059541	-0.340863	-0.230771	0.313066
RARA	-0.357567	-0.927909	0.553739	0.704733	0.336321	0.319284
RARB	0.501484	0.585262	0.171776	0.662909	0.0183137	0.308626
RARG	-0.748772	-1.19284	0.501933	-0.032679	0.863079	0.666203
RBBP9	2.59158	2.6198	1.92576	1.23372	1.2024	0.585051
RBP4	0.231997	-0.147422	-0.500008	-0.0610518	-0.076484	-0.0647087
RBX1	-2.87673	-1.9612	-3.28361	-3.5041	-3.71017	-2.33766
RCE1	-0.622642	-0.95144	0.311567	-0.192287	0.0845929	1.05046
REN	0.124471	0.133658	0.129707	0.13199	-0.234555	-0.201242
RET	0.140832	0.0545097	0.502062	1.03007	0.409975	-0.600702
RFC3	-2.37565	-3.02346	-3.41706	-4.78597	-2.08245	-2.58006
RFC4	0.113271	-0.446076	-1.21047	-0.308431	-0.505764	0.102637
RHD	0.877291	1.42448	2.03006	1.18707	-0.214957	-0.389088
RICTOR	0.291678	0.592167	0.451496	0.430805	-0.397257	0.748968
RIPK1	0.571861	1.4504	-0.769412	-0.133613	-0.39572	-1.57988
RIPK2	-0.940038	-0.461746	-0.0783383	-0.352463	-1.0173	-1.0945
RNPEP	-0.667033	0.175306	-0.415347	0.094646	-0.655033	0.0687194
RNPEPL1	-0.724634	-0.0733473	0.121172	0.385788	-0.34633	-0.00962454
ROCK1	1.49623	2.24694	0.443287	0.891188	0.476371	0.98118
ROCK2	-0.309796	-0.363758	1.46646	1.53187	1.75009	1.47286
RORB	0.716243	0.667048	-0.592379	-0.267383	-0.0287207	-0.23909
RORC	-0.662153	-0.621913	-0.504348	-0.717254	-0.765882	-0.546238
ROS1	0.644797	0.667994	-1.17413	-0.946113	0.0908449	0.240185
ROSA26	0.145276	0.152846	0.148158	0.147953	-0.213408	-0.180963
RPE65	-0.043035	-0.30879	-0.607645	-0.724365	0.119205	-1.25361
RPL11	-1.85346	-2.93637	-2.37481	-2.5123	-0.713326	-1.3156
RPL18	-1.92214	-1.92846	-0.0984133	-0.977729	-1.39521	0.595853
RPL18A	-1.01565	-2.41791	-1.36701	-1.4268	-1.53483	-0.685505
RPL27A	-1.94686	-1.38688	-3.98768	-4.65516	-3.3619	-3.67504
RPL3	-0.0143659	-0.466119	-3.07862	-2.56533	-2.45632	-3.15987
RPL35	-1.56214	-1.07545	-2.34925	-1.99674	-0.681398	-2.29457
RPL37A	-0.441715	-0.730625	-0.649803	-1.20557	-0.358168	-0.112448
RPL4	-2.35509	-2.40547	-4.48102	-4.71919	-3.9646	-4.37765
RPS11	-2.06011	-2.40287	-2.05602	-1.53577	-1.97747	-1.14081
RPS6KA1	-0.698443	-0.899254	-1.52555	-1.02659	-0.0882538	-0.991513
RPS6KA2	-0.142891	0.300866	0.571894	-0.167071	0.783696	0.0574811
RPS6KA3	1.09339	0.536537	-0.0545453	0.14253	-0.0218829	1.91632
RPS6KA4	0.938896	1.57889	0.930428	0.675986	0.98159	1.03079
RPS6KA5	0.575443	0.507564	1.44247	0.906599	0.351205	1.06272
RPS6KA6	0.119207	0.239955	1.45023	0.942645	-0.384952	-0.835956
RPS6KB1	-1.03515	-1.49914	-0.0330507	-0.0243364	0.943683	-0.282491
RPS6KB2	-1.51175	-1.08067	-2.31365	-1.21681	-2.21643	-2.1052
RPS8	-2.65777	-2.49172	-2.95107	-4.64552	-3.32752	-3.9595
RPS9	0.558725	0.296225	-3.39233	-2.99537	-1.53461	-2.8735
RPTOR	-0.864091	-0.917268	-0.949301	-1.08914	-1.03906	-1.41949
RRM1	1.00476	1.53539	-2.57624	-3.302	-2.18391	-0.819505
RRM2	-0.293797	-0.37097	-2.57317	-1.68934	-1.14026	-1.51941
RRM2B	-0.359058	0.301564	-0.822163	-0.50158	-0.924594	-1.73915
RTN4	-0.0267264	-0.285024	0.703367	0.0913243	1.28754	0.658441
RUVBL1	-3.37207	-1.418	-3.16034	-3.9052	-0.525066	-4.54008
RUVBL2	-2.08125	-2.83215	-0.530038	-0.601002	-0.181435	-1.01829
RXFP1	0.200714	0.531041	0.546583	0.432453	1.16	-0.00209975
RXFP2	0.876946	0.950809	0.274156	-0.881381	0.0165864	-1.12519
RXFP3	1.31665	1.32198	0.707238	0.872692	0.77479	0.479021
RXFP4	0.444536	0.0153914	0.365146	-0.266714	-0.377916	-1.09095
RXRA	-0.23414	-0.230042	-0.966633	-0.270021	-1.96863	-0.738145
RXRB	0.455736	0.261078	1.95902	1.7063	2.5257	2.62829
RYR1	0.763135	-0.0260773	-0.434351	0.00105504	-0.403467	-0.730281
RYR2	0.75326	0.63675	0.462821	-0.063356	0.889808	0.888633
RYR3	0.93969	1.10628	1.85562	1.22198	1.93199	0.554757
S1PR1	0.83364	0.920818	0.989669	0.28329	-1.54721	-1.08544
S1PR2	-0.0289392	0.7153	2.27085	1.49959	2.01347	1.65489
S1PR3	0.461566	0.232328	1.83539	0.855558	0.427076	1.97898
SBK3	0.882222	1.13233	1.89908	0.939044	1.88122	0.947032
SCN10A	-0.140577	-0.760299	-0.0109141	-0.499583	-1.50421	0.298509
SCN11A	0.206934	-0.502436	0.30841	0.263432	-1.4428	0.0212522
SCN1A	-0.719136	-0.718561	0.887999	1.27834	1.50355	1.75629
SCN2A	0.407685	-0.038151	-0.0991306	-0.293943	-0.324667	1.14251
SCN3A	0.602212	0.623284	-0.622842	-0.190058	-0.146938	-1.14678
SCN4A	0.836382	0.336452	2.18814	0.538638	1.18085	1.62034
SCN5A	-0.482745	-0.678403	-1.0615	-1.25833	-0.482289	-0.972537
SCN7A	1.13823	1.35109	0.688043	0.95958	1.12155	0.725849
SCN8A	0.0151206	0.360311	1.04499	1.50749	1.46595	1.73876
SCN9A	0.821322	0.729516	0.202167	-0.0442642	-0.503469	-0.464927
SCNN1A	2.47023	1.88983	-0.01075	1.70405	2.11169	1.82349
SCNN1B	-0.331412	-0.254364	-0.540356	-0.629464	-0.256785	-0.0382825
SCNN1G	0.504114	0.619981	-0.316901	-0.017396	-0.713435	-1.21984
SCTR	-0.66422	-0.0647101	0.750116	-0.346859	0.372579	1.08891
SELE	1.77167	1.42759	0.455525	0.727527	0.0860475	-0.0865164
SELL	-1.21858	-0.893524	-1.64091	-2.88137	-2.92571	-2.03597
SELP	0.420179	1.10012	0.00196806	0.149815	-0.808776	-0.561542
SENP1	0.748245	0.650206	-0.788654	-0.41867	-0.668558	-1.19136
SENP8	-0.0357884	-0.307294	-1.55086	-0.975599	-0.311199	0.595539
SERPINA1	0.683065	1.18473	0.582973	0.54138	0.0518001	0.00397327
SERPINA3	1.2495	0.771243	2.18363	1.24356	1.3365	1.6851
SERPINC1	-0.617847	-0.495965	-0.275133	-0.0767624	-0.719828	-1.10177
SERPINE1	1.24547	0.777359	0.66929	0.243569	1.67507	0.569201
SERPINF1	-0.0157084	0.0897091	-0.968818	-0.664032	-1.84662	-1.96385
SETD2	0.0929078	-0.00443348	-1.34114	-1.66625	-0.744379	-2.49074
SETD7	-0.508035	-0.747741	0.203013	-0.0869577	0.189767	0.23803
SGK1	-0.624622	-0.238269	0.754981	0.0839592	-0.284056	-0.302915
SGK2	0.614375	0.379065	0.100501	-1.06659	-1.36595	-1.06406
SGK3	1.59423	1.70979	1.78559	2.63662	0.947699	1.98223
SGMS1	0.328138	-0.0193074	-1.51286	-0.718345	0.0921698	0.712531
SGMS2	-0.0359776	-0.547701	-0.703296	-0.627149	-1.45473	-0.671796
SGPL1	-0.43713	0.0703518	-0.524847	-0.715727	-0.701091	-0.0834708
SHQ1	-0.430258	-0.210254	3.02717	2.91012	3.08016	0.206202
SIGMAR1	0.450824	0.436	0.0522533	0.0117881	-0.383769	-0.18042
SIK1	0.671572	1.20733	0.943723	0.609038	0.512307	1.62042
SIK2	-0.439021	-0.780549	-1.23874	-1.19646	-1.66713	-1.41149
SIK3	-0.888358	-0.768902	0.933693	0.888729	0.997923	1.17882
SIRT1	-0.730746	-0.558829	0.141906	0.417444	-0.233552	0.192171
SIRT2	0.300386	0.107066	0.945065	0.959357	1.31754	1.54073
SIRT3	0.12889	0.465771	0.310232	1.35281	0.529891	1.61085
SIRT5	0.29503	0.189561	0.711558	1.61583	0.614954	0.31257
SIRT6	0.143004	-0.359162	0.576197	0.0748379	-0.10802	0.0438926
SLAMF7	0.196135	0.17079	-0.39748	-1.13472	-0.352706	-0.167971
SLC10A1	-0.246369	0.174734	-0.234348	-0.798039	0.376473	0.317538
SLC10A2	1.08085	1.08556	0.773464	1.35363	1.18535	1.77777
SLC11A2	-0.73727	-0.271484	0.484512	0.748802	0.867972	0.716093
SLC12A1	-1.8757	-2.42156	-1.47922	-1.51152	-2.01353	-1.4539
SLC12A2	-0.131825	-0.000753946	0.259386	0.781457	0.323994	1.05694
SLC12A3	1.53296	1.07321	2.08161	1.83644	0.674439	1.65387
SLC12A4	0.516735	0.406233	-0.580044	0.350761	-0.0470839	-0.60874
SLC12A6	-0.819793	-0.594632	1.05973	0.728941	1.47588	0.137151
SLC12A7	0.300268	0.437327	0.680616	0.733646	0.698652	-0.0468861
SLC15A2	1.56194	1.65419	2.07712	1.88597	1.7784	1.12563
SLC16A1	-2.19832	-1.92527	-1.05963	-1.91944	-2.16889	-2.42214
SLC16A7	-1.80039	-1.7057	-0.798782	-0.401061	-1.37062	-1.04335
SLC17A9	0.205491	0.198139	-0.655517	-0.573068	-0.551142	-0.658986
SLC18A1	0.685633	0.536796	0.990452	0.622083	1.10693	2.05811
SLC18A2	0.694028	0.739017	0.579665	-0.300155	1.12727	-0.136568
SLC19A1	0.104967	0.487288	-0.678662	-0.864284	0.0327334	-0.704454
SLC1A2	1.01352	1.08967	0.096548	0.20309	-1.02706	-0.0371482
SLC1A3	0.456504	0.0584335	1.02247	0.754431	0.339812	0.160859
SLC1A5	-0.319489	-0.283963	2.48852	1.76105	0.908554	1.70105
SLC1A6	0.588297	0.102507	0.184432	-0.311278	-1.3984	-0.297497
SLC1A7	-0.803129	-0.474399	1.32267	0.47102	0.801401	0.88254
SLC22A1	-0.390248	-0.342931	0.52842	0.176722	-0.254019	-0.653999
SLC22A11	0.368278	0.42434	1.51631	1.70555	1.58658	0.254717
SLC22A12	0.373864	0.193992	0.548881	0.106606	0.346063	0.993032
SLC22A2	-0.0235866	-0.652563	0.408947	0.444138	-0.369926	-0.170485
SLC22A6	0.519394	1.21694	0.0102004	0.216958	0.819717	-0.439127
SLC22A8	-0.444051	-0.374889	0.0238878	-0.00412084	-0.843777	0.257413
SLC23A1	-0.0220796	0.15194	1.21454	0.930749	0.389241	1.01886
SLC25A1	0.346114	-0.554898	1.28347	1.53219	-0.583329	-1.29961
SLC25A4	-0.426643	-0.34448	-0.178115	-0.143847	-0.707549	-0.174781
SLC27A1	0.60961	0.628993	0.323888	0.537938	-1.0762	0.677508
SLC28A2	-0.0158607	0.321508	0.300453	-0.0547389	-0.227945	-0.853898
SLC28A3	-0.700148	-0.452499	0.232187	1.12653	1.03588	0.803598
SLC29A1	0.614032	0.631044	1.04575	0.613145	1.4572	1.5112
SLC29A4	1.04848	1.29879	1.86438	2.5707	2.05263	2.12662
SLC32A1	0.164467	-0.0193174	0.576517	0.732142	-0.339129	-0.324677
SLC36A1	2.21475	1.85909	0.434793	0.426152	0.93003	-0.0269409
SLC44A1	0.0980277	0.321739	0.670314	-0.3898	-1.47899	-0.207279
SLC47A1	0.800888	0.832234	-0.14933	0.156848	0.620524	-0.863986
SLC5A1	-0.598092	-0.438128	-0.760673	-0.738921	-0.191424	-0.922513
SLC5A11	1.24468	0.99538	0.787066	0.724307	0.253133	0.885425
SLC5A2	0.0640563	0.64434	-0.843665	-0.157816	0.450506	0.633783
SLC5A3	-0.343193	-0.857468	-0.160235	0.272997	-0.342145	-1.43746
SLC5A7	-0.0337333	-0.501073	0.325053	0.0617158	0.14997	-0.422184
SLC5A8	-0.412083	-0.387217	-0.171403	0.0728048	-0.506746	-0.298906
SLC6A1	0.873432	1.01622	-0.595263	-0.895435	-0.441817	0.0981978
SLC6A12	-0.120253	0.122524	1.46291	2.00458	2.39543	0.64053
SLC6A14	-1.13509	0.0472098	-0.0471002	0.683241	0.0139836	0.173458
SLC6A15	-0.989704	-1.01596	-1.13054	-0.954038	-0.789939	-1.57307
SLC6A19	0.802676	0.851071	0.621157	0.62801	0.83698	0.0801411
SLC6A2	0.358381	0.288566	-0.191597	-0.674189	0.790838	0.323133
SLC6A3	0.274644	0.671306	1.65654	1.59251	1.88652	1.25486
SLC6A4	-0.349325	0.537008	0.701653	0.786457	1.01389	0.609746
SLC6A5	0.100608	-0.315697	0.331628	0.716236	0.711183	-0.029641
SLC6A7	-0.289068	-0.0296832	0.682716	0.768861	0.536003	1.18757
SLC6A9	-0.081149	-0.119422	0.00852005	0.950945	0.107019	-0.407026
SLC7A5	1.0202	1.09244	2.34768	2.36887	1.72899	1.79642
SLC8A3	0.241668	0.438667	0.950485	0.734013	1.23717	1.25359
SLC9A3	0.274805	-0.0132289	0.873462	0.17299	-0.0717224	0.539633
SLC9A5	0.128324	0.164947	0.4681	1.0679	3.05824	0.865241
SLCO1A2	-0.493817	-0.0988697	0.264961	0.708815	0.783628	-0.0205034
SLCO1B1	-0.206182	-0.393501	-1.88847	-0.921355	0.610685	-0.595331
SLCO1B3	-0.622846	-0.909902	-0.133613	-0.156611	-1.15015	-0.333179
SLCO1C1	1.04755	2.10665	1.02823	1.27075	-0.520739	0.729799
SLK	-0.274652	-0.360601	-1.80899	-1.95905	-2.74181	-1.55823
SMARCA4	0.394721	0.196085	-1.41093	-0.600963	0.115926	-1.32318
SMC3	-1.21037	-1.06967	-2.15291	-2.23018	-0.895627	-1.63109
SMG1	-2.41503	-1.83725	-2.46576	-2.00629	-1.8245	-1.47211
SMO	-0.925539	-1.14386	0.273125	-0.333577	-0.154597	-0.33542
SMPD4	0.597444	0.685798	-0.686958	-1.75093	-0.950644	-0.795628
SMYD2	-0.40604	0.227857	-0.541144	0.48929	-1.0585	-0.887293
SNAP25	2.38455	1.84874	1.59662	0.990333	-0.291128	0.792654
SNCA	0.973609	0.956387	0.345674	0.562122	1.21472	1.03355
SOD1	-2.22362	-1.9317	-1.22152	0.365647	-1.00199	-1.4798
SOST	0.558742	0.64812	1.02329	1.50476	0.87964	1.09977
AFG2A	-3.20026	-3.02907	-2.75156	-4.35506	-4.09391	-1.04199
AFG2B	-1.43304	-0.640614	-1.04648	-0.936575	-0.0768343	-0.579042
SPC24	-2.00047	-2.36703	-3.14392	-2.38775	-1.76951	-2.81307
SPHK1	0.928497	0.289069	0.935419	0.999705	2.19408	0.917743
SPHK2	0.553453	0.779613	0.940236	1.60216	0.907152	-0.207087
SPP1	-0.423575	-1.29871	-0.574643	-0.29206	-0.393154	-0.846928
SPR	-2.31969	-1.86311	-0.99853	-0.726345	-0.386877	0.175015
SPTLC2	-1.02223	-0.725287	0.844704	0.578361	1.3861	-1.00984
SPTLC3	0.748006	0.681991	0.475225	0.974394	1.52441	-0.0859419
SQLE	-1.90751	-3.36575	-0.33475	-1.36724	-0.473954	0.784742
SRC	0.219823	0.534735	0.0474386	-0.177493	-0.573684	-0.020511
SRD5A1	0.0261676	0.233612	0.312079	0.821573	0.380755	-0.0891882
SRD5A2	0.237622	0.544037	-0.884309	-0.534169	0.257236	-0.798968
SRD5A3	-0.10633	-0.683569	-0.328001	0.151634	-0.53222	-0.637484
SRMS	-0.521536	-0.311274	0.156643	0.673596	0.244496	1.03296
SRP72	0.322169	0.188708	-2.6351	-1.6401	-1.48185	0.18448
SRPK1	-1.12533	-0.747756	-1.17586	-2.08007	-1.31401	-1.89987
SRPK2	0.554886	-0.497675	-0.910172	-1.01312	-0.649496	0.0964668
SRPK3	0.596003	0.789063	1.64115	0.211351	-0.31572	-0.479461
SSTR1	-0.416751	0.0111556	-0.939458	-0.175949	-0.878284	-0.759792
SSTR2	-0.944432	-1.11889	0.348014	-0.319703	-0.795514	-0.454253
SSTR3	0.758401	0.239387	1.92735	1.77764	1.20499	1.00369
SSTR4	2.7071	2.43613	2.73796	2.41679	2.653	2.86284
SSTR5	1.51749	1.59811	0.316142	0.749039	-0.161212	0.0942007
ST14	0.503457	0.0993668	-0.0841686	-0.501563	-0.353834	0.0304382
STAT1	0.214605	0.15092	0.139495	-0.0572024	0.0490139	0.272988
STAT3	-0.179235	0.68625	0.694639	0.57125	0.681247	2.08136
STK10	0.272851	0.350215	1.38784	1.43791	2.33085	1.94929
STK16	0.642508	0.758515	-0.318978	-0.140296	-0.692869	0.227232
STK17A	0.303054	-0.306612	0.0776981	0.375227	0.435908	1.75497
STK24	0.846403	0.66415	0.713711	-0.17536	0.947502	0.0938366
STK3	0.879879	0.834612	2.28476	1.46731	-0.00766583	1.72068
STK31	0.861831	0.915289	0.108136	0.473174	0.603096	0.340634
STK32B	0.717704	1.24293	0.670421	0.66014	1.12355	1.14934
STK33	0.230335	0.143799	-0.149043	-0.315659	-0.142087	0.00255869
STK36	0.427475	1.32653	-0.291523	-0.424371	-1.2616	-0.939607
STK38L	-0.844407	-0.439034	0.214333	-0.388159	0.463889	1.27922
STK4	-0.0125111	0.492713	0.16136	-0.0169273	-0.345703	1.49253
STS	0.296789	-0.425013	0.637304	0.895254	0.224597	0.266423
SUCNR1	-0.836255	-0.189946	1.0166	-0.273234	1.66508	1.06822
SUPV3L1	0.384532	0.416684	0.66509	0.038627	1.39669	0.498954
SUV39H1	-0.429034	-0.172237	-0.745214	0.200306	-2.7815	-2.67569
SV2A	0.647736	0.405414	0.544841	0.174896	0.653937	0.218928
SYK	2.51843	2.88086	0.963512	0.782272	0.749573	1.3191
TAAR1	0.400094	-0.079287	1.70426	1.95072	-0.0795293	2.599
TACR1	1.44681	1.13584	0.187751	0.00613911	-1.62313	-1.05279
TACR2	0.699679	-0.184576	-0.515176	0.487222	0.0168962	-0.670967
TACR3	-0.305807	-0.229406	-1.76155	-0.761995	-1.66199	-0.872962
TAF1	-1.07675	-2.14425	-2.72504	-3.28435	-2.91467	-3.17637
TAOK1	-1.31402	-1.26067	1.96038	2.39363	3.06966	2.78584
TAOK3	-0.429268	-0.469844	-0.0921713	-0.199763	0.473658	1.3846
TAP2	0.822399	1.6318	-1.13701	-0.613946	-1.96587	-0.758951
TASP1	0.4652	-0.052499	0.890452	0.34039	2.16073	1.60031
TBCD	0.0701939	0.00109218	-0.117359	0.246451	-0.416307	-0.369083
TBK1	0.144573	0.163816	-0.388207	-1.01791	0.88604	-0.755164
TBXA2R	-0.358937	-0.829129	0.648031	0.363105	1.20119	0.826781
TBXAS1	0.636555	0.922727	2.06723	2.57598	2.54158	2.13916
TDO2	0.756953	1.25534	0.717716	0.970113	1.06704	1.75237
TEC	-0.385013	-0.227402	-1.71143	-0.796097	-1.97665	-1.40484
TEK	-0.455112	-0.0300657	0.896418	1.30521	0.363359	0.594189
TEP1	0.455897	0.272456	-0.412892	-0.204321	-0.141627	0.567598
TERT	0.415684	-0.103069	0.196279	0.165965	-0.621455	0.123257
TESK1	-0.953986	0.0649959	-0.967275	-0.772035	0.0431112	-0.21783
TESK2	0.4981	0.749094	1.34549	1.00633	1.0927	1.68418
TGFB1	-0.0443655	-0.0281452	-0.734889	-0.325355	-0.700694	-0.393065
TGFB2	0.56899	0.591208	0.592157	0.105798	-0.432022	1.22336
TGFB3	-0.337805	-0.493314	0.183086	0.0782414	-0.0469656	-0.556145
TGFBR1	0.0461873	0.258892	0.109471	0.0504182	0.493867	-0.0535235
TGFBR2	-0.443253	-0.487873	-1.01382	0.153087	-0.640502	-2.02712
TGM2	0.657167	0.587765	0.290884	-0.149067	-0.744486	-0.469039
TH	0.714569	0.710911	1.14969	0.584027	1.53134	1.64275
THOC5	-1.4996	-1.90851	-2.3458	-1.20344	-0.850005	-1.25987
THRA	-0.396789	-0.698902	0.516017	1.15507	0.806961	1.6702
TIE1	0.361689	0.387959	1.08436	-0.09734	0.893297	1.93552
TLR4	-1.06071	-0.195799	0.0217325	0.367443	0.998534	0.0975264
TLR7	1.77879	0.984728	2.03898	1.59934	0.489781	1.1993
TLR8	-0.386214	-0.542335	-0.667145	-0.680607	-0.00820911	-1.36252
TLR9	1.5005	1.27911	0.177789	-0.284159	-0.236511	-0.269011
TMEM199	-2.36959	-2.71437	0.132886	0.0647536	-0.855083	-0.442707
TMPRSS11D	0.407695	0.227247	0.626359	0.229121	1.35264	0.538427
TMPRSS2	0.306909	-0.577796	-0.456197	-0.796627	-2.07766	-1.19352
TMPRSS6	0.718425	0.927003	-0.0214992	-0.551833	-0.546974	-0.665595
TNF	0.59684	0.478713	-1.01241	0.327273	0.310729	-0.200853
TNFRSF4	0.561819	0.785213	0.446603	0.638177	0.298471	-0.946129
TNFRSF8	0.5144	0.757488	0.0189125	0.298704	0.504261	0.197102
TNFSF11	1.80029	2.37685	0.403526	0.261671	0.70767	0.541932
TNFSF13	0.906579	0.832353	1.3533	1.19145	1.20603	0.764416
TNFSF13B	-0.165286	-0.531464	-0.208196	-0.0135125	0.00429899	-0.790372
TNFSF14	0.229209	0.236936	1.04974	0.642757	1.32859	1.12158
TNFSF4	0.715083	0.90281	0.364965	0.307502	0.571757	-0.198616
TNIK	-0.617178	0.297452	-0.531409	-0.514526	0.0781889	-0.365305
TNK1	1.19212	1.32246	0.504369	0.535332	0.256897	-0.506337
TNK2	0.822605	0.915569	-1.75665	-0.45213	-0.754268	-0.421277
TOP1	-1.59454	-1.11459	-0.0311566	-0.889171	-0.902902	-0.184415
TOP1MT	-1.07414	-1.25519	-1.25632	-0.677299	-0.749899	-0.948009
TOP2A	-2.05314	-1.64493	-3.08483	-2.09807	-0.600332	-1.17005
TOP2B	-0.669168	-1.22526	-0.270683	-0.231636	-1.41936	-0.767149
TP53	0.0540239	0.0832045	1.46136	1.76655	0.933597	-0.281124
TPH1	-0.509317	-0.974279	-0.845821	-0.707103	0.155551	0.909939
TPH2	-1.15138	-0.868985	-0.298498	-0.0260081	0.219225	0.184191
TPO	0.198759	0.460845	0.523856	1.0226	1.0219	1.31907
TPP2	1.57072	1.43477	1.29883	0.481326	1.97979	1.44194
TPSAB1	0.542916	0.390677	0.39681	0.462248	-0.424044	-0.49939
TPX2	0.362433	0.0628074	0.227795	0.83434	1.3102	0.967948
TRAP1	-0.430129	-0.763357	-0.183434	0.295781	0.282922	0.271977
TRIM24	2.1381	2.11859	0.846301	0.718273	1.93453	1.85126
TRPA1	-0.990967	-1.00535	-0.504774	-0.850263	-0.196925	-0.980884
TRPV1	0.270869	0.388376	0.365529	0.906372	1.04112	1.05525
TRPV3	0.244956	-0.0203189	-0.592379	-0.224024	-0.211143	-1.25091
TRPV4	-0.355995	-0.0838433	0.74352	1.69639	1.89656	1.76216
TSSK1B	1.10133	0.230438	1.90749	0.881047	0.580044	-0.298479
TSSK2	-0.728314	-1.07713	1.60107	2.2053	1.44102	0.797982
TTK	-2.29195	-2.28037	-1.06112	-2.10835	-1.41253	-2.0567
TUBA1A	-0.763858	-1.20962	-3.09191	-2.11523	-1.05438	1.04493
TUBA1B	-1.33115	-1.46814	-2.3708	-2.75818	-1.36493	-1.34437
TUBA1C	1.31342	1.00949	-0.0615377	-1.37411	-0.525231	-0.309192
TUBA3D	1.21381	0.914681	0.259097	0.25897	0.687544	1.13279
TUBA3E	0.716199	1.06552	-0.0315358	-0.590465	0.794009	-0.640469
TUBA4A	1.57256	1.5774	-0.542589	-0.707033	-0.0103977	-0.212399
TUBB	-0.709379	0.174875	-2.20273	-2.59156	-0.842204	-1.67552
TUBB1	2.09996	2.46127	1.07316	0.397234	0.0306437	-0.162424
TUBB2A	0.363496	0.319534	1.21318	1.02179	0.843891	1.27261
TUBB2B	-0.954481	-1.05014	0.222031	-0.794371	-0.984815	0.0584423
TUBB3	0.445253	0.54866	1.05415	1.20294	0.604339	0.94327
TUBB4B	-1.06826	-0.72173	-0.772104	-1.23493	-0.401663	-0.607107
TUBB6	-0.126103	-0.607834	0.617596	0.461874	0.854607	0.928534
TUBB8	0.414241	0.0868182	-1.50995	-1.08111	-1.03866	-0.109939
TUBG1	-0.142273	-0.192784	-1.21166	-0.444193	-1.25384	-0.934859
TXK	-0.165302	0.0953103	1.89254	2.05681	1.90296	2.12255
TXN	-5.01875	-4.64619	-3.44566	-4.41482	-3.9636	-4.4379
TXNRD1	-0.814012	-1.05166	-0.671508	-1.24616	0.444564	-0.36315
TYK2	0.741725	0.361506	-0.993151	-0.90213	-1.83761	-0.560971
TYMP	-0.531903	-0.466963	-0.488292	-1.21743	-0.346558	-0.939574
TYMS	1.3985	1.65247	1.50789	0.762339	1.03674	2.60982
TYR	0.919364	1.03012	-0.219716	-0.592864	0.993097	0.311233
TYRO3	0.58423	0.351961	-0.0905963	0.480957	-0.0505538	0.422993
U2AF2	-2.0784	-2.15617	-1.80271	-2.07908	-2.09353	-1.3317
UBA1	-0.867233	-1.78397	-2.84333	-2.06422	-0.98346	-2.70851
UBA3	-2.17831	-1.68757	-2.69867	-2.50004	-2.22462	-2.91785
UCHL1	-0.826957	-0.827959	0.142878	0.107035	-0.0914575	-0.322848
UCHL3	0.705288	1.04401	0.946028	0.487913	-0.85626	-0.266329
UGCG	0.321972	-0.334716	-0.407098	-0.490083	-1.65959	0.38058
ULK1	-0.585556	-0.351916	0.255385	0.107118	0.67124	0.884238
ULK3	-0.0168784	-0.0048396	0.620411	-0.748467	-0.239316	-1.80214
UPF1	-1.32482	-0.602304	-2.88692	-3.20292	-1.0056	0.200156
USP1	-2.0173	-1.39027	-2.1466	-0.564683	-2.52149	-1.94712
USP14	-0.224874	0.227568	-0.297479	-0.411605	0.629432	-0.433021
USP5	-0.366391	-0.447418	-1.7288	-0.467866	-0.731631	-0.704576
UTP20	-1.30983	-1.52619	-4.84615	-3.7594	-0.82423	-5.26408
UTS2R	0.969807	0.473555	1.51047	1.85991	1.84705	2.21714
VAMP2	-0.586047	-0.298422	0.353427	0.618248	-0.703395	0.882707
VARS1	-2.29732	-3.22758	-3.7796	-5.26504	-3.86603	-2.12299
VDR	1.07941	1.23514	1.48634	1.01766	0.0784115	0.903246
VEGFA	-0.469546	-0.744851	0.207461	0.378894	-0.816213	-0.308313
VEGFB	1.43859	0.807922	1.87755	1.36405	2.23774	1.57775
VEGFC	-0.0126792	-0.0338032	-0.534321	0.433963	-0.671704	-0.206078
VIPR1	1.34473	1.42244	2.02239	1.68517	2.89511	2.90439
VIPR2	-0.285038	-0.223491	-0.0677931	-0.129808	0.194295	0.732809
VKORC1	0.234329	0.066371	-0.40612	-0.224696	-0.7173	0.0666149
VPS25	-5.20896	-2.9508	-0.524359	-1.74695	0.246827	-1.48047
VWF	-0.573912	-0.763915	1.38953	1.32458	1.37529	1.43571
WDR5	0.677345	0.334064	-2.65683	-2.07309	-2.15239	-2.59487
WDR74	-2.18839	-1.31903	-1.72756	-0.409044	-0.757961	-0.542238
WDR75	-1.88197	-1.57898	-2.22003	-1.75827	-2.21532	-1.19651
WEE1	2.25597	1.15727	-3.20621	-1.78632	-1.58802	-2.367
WNK1	-0.197601	-0.0660892	-0.418998	0.279672	0.196477	0.165922
WNK2	0.114821	-0.126278	-0.420197	-0.212185	-0.952592	-0.80316
WNK3	0.56486	0.90982	0.344089	0.831811	0.0216048	-0.0677104
XDH	0.707279	1.41453	1.18544	0.823375	0.848338	0.278516
XIAP	0.629307	0.203258	0.683871	0.59067	0.505799	0.309481
XPNPEP1	0.315341	0.365289	0.496917	-0.338817	-0.365648	-0.619266
XPNPEP2	-0.386999	-0.415924	-0.0952933	-0.275508	-0.311429	-0.114622
XPNPEP3	0.205462	-0.0970737	0.84194	0.97181	0.972278	0.012255
XPO1	-2.1072	-1.07212	-3.06685	-2.39889	-4.04845	-3.70674
YARS1	-1.49308	-1.70276	-2.75118	-1.88645	-2.19584	-1.85408
YARS2	-1.94975	-2.63619	0.604443	-0.601426	0.519792	0.696795
YES1	0.112422	0.649899	-1.44007	-1.329	-2.06875	-2.7939
ZACN	1.26703	1.11839	0.043629	-0.806653	0.501389	-0.582666
ZAP70	0.620695	0.805203	-0.895257	-0.940117	-1.29485	0.941229
Zhang_294	1.58465	1.75268	0.689489	-1.45765	-0.98243	-1.15421

## Sheet: JHH7-LR Z-score and hits
Gene	JHH7WT_DMSO_R1	JHH7WT_DMSO_R2	JHH7LR_DMSO_R1	JHH7LR_DMSO_R2	JHH7LR_LVT_R1	JHH7LR_LVT_R2		JHH7LR mono hits					JHH7LR combo hits
AARS1	-1.6906	-1.68658	-1.71389	-1.35183	-2.04987	-1.248		Gene	JHH7WT_DMSO_mean	JHH7LR_DMSO_mean	diff (JHH7LR - JHH7WT)		Gene	JHH7LR_DMSO_mean	JHH7LR_LVT_mean	diff (LVT - DMSO)
AAVS1	0.0711862	0.073414	-0.0258776	-0.0200953	0.0502829	0.0561923		ADAM12	-0.081457	-2.08596	-2.00451		ANO1	-1.10532	-2.16114	-1.05582
ABAT	0.0482294	-0.0712678	0.766081	0.686705	-0.42145	-0.148836		AURKB	0.836414	-1.16417	-2.00059		CCND1	-3.17221	-4.56195	-1.38975
ABCA1	0.973231	0.892873	0.882383	0.540173	0.438019	0.918088		BPTF	0.981108	-1.13117	-2.11228		CSTF1	-1.01965	-2.18869	-1.16904
ABCB1	-0.116407	0.0667696	1.67232	1.99233	0.706177	0.613379		CD40LG	1.11461	-1.3299	-2.44451		EGFR	-0.435718	-3.61921	-3.18349
ABCB11	-1.39295	-1.31581	-0.0604058	0.378911	0.608179	0.774489		CDK1	-0.0284837	-2.71029	-2.68181		GGPS1	-1.4151	-2.83866	-1.42357
ABCB4	-0.075652	-0.0698858	-0.247486	-0.576411	-1.4445	-1.08524		CMA1	0.290424	-1.73976	-2.03018		HMGCS1	-3.09743	-4.71897	-1.62154
ABCC1	0.825479	0.85927	0.588202	0.527252	0.526403	0.536633		DYRK2	0.942859	-1.63793	-2.58079		HNF4A	-2.58468	-3.94954	-1.36486
ABCC2	-1.32721	-1.07399	-0.933657	-0.857828	-1.48459	-0.843167		GLRA3	0.943678	-1.16737	-2.11105		IMPDH2	-1.23429	-2.25335	-1.01906
ABCC4	1.09625	1.20162	2.33453	1.61821	1.95735	1.71935		HSPA5	0.811117	-1.77644	-2.58756		ITGAV	-0.838252	-2.35185	-1.5136
ABCC5	-0.724027	-1.14271	1.66715	1.48482	1.79894	1.59306		IL1B	0.0939029	-2.68884	-2.78274		MVK	0.404708	-1.11886	-1.52357
ABCC8	2.29891	2.43694	1.06728	0.92851	0.895849	0.940343		IL6ST	-0.00437948	-2.17131	-2.16693		NDUFA11	-0.664759	-2.33491	-1.67015
ABCG2	-0.580861	-0.517833	0.502103	0.910371	1.60356	0.65534		KIF11	-0.975752	-3.42513	-2.44937		NDUFA6	-2.32136	-3.47969	-1.15833
ABHD6	0.449429	0.451811	0.206638	0.493731	0.632434	0.741444		NDC80	1.24985	-1.55239	-2.80225		NDUFS2	-2.27945	-3.42445	-1.145
ABL1	0.198333	-0.0088129	-0.627802	0.373698	-0.0247428	-0.326373		NDUFB11	-1.12539	-3.14197	-2.01658		PGA5	0.415584	-0.696296	-1.11188
ABL2	0.0697855	0.00834862	1.44583	1.88335	1.58068	1.21031		POLE	-1.05419	-3.27573	-2.22154		PMPCA	-2.64052	-4.32948	-1.68896
ACACA	-0.812863	-1.34209	-1.52623	-1.83435	-1.98086	-2.29089		POLR3H	-2.22274	-4.74876	-2.52602		PSMB4	0.17373	-0.921696	-1.09543
ACACB	0.976879	1.0288	0.447992	0.32486	0.514547	0.735111		PSMA2	0.853763	-3.16766	-4.02143		RAD51	-2.08153	-3.18324	-1.1017
ACAT1	0.71656	0.483553	0.35353	0.52328	0.0267435	-0.0171507		PSMA6	3.31625	-1.39116	-4.70742		RPL3	0.340229	-0.747398	-1.08763
ACE	1.35993	0.972231	0.524217	1.21062	0.505206	0.150139		PSMD7	0.444876	-1.97521	-2.42008		RPS8	0.112102	-1.29972	-1.41182
ACE2	1.65905	1.14636	1.87824	2.02694	1.10427	1.76316		RAN	3.06295	-1.0514	-4.11434		SRP72	-1.28894	-2.42602	-1.13708
ACHE	-1.13717	-0.799941	0.208287	0.225384	0.14186	0.231519		STK31	0.895168	-1.33064	-2.22581		TOP1	-2.12684	-3.22158	-1.09474
ACR	0.634349	0.406912	-0.108533	-0.109829	0.344292	0.552497		VARS1	-0.875747	-2.89447	-2.01872		TXN	-0.974668	-2.2585	-1.28384
ACVR1	0.362674	0.214933	-0.135011	0.125065	-1.14624	-0.657107		YARS2	-1.60758	-4.44382	-2.83624		VARS1	-2.89447	-3.96707	-1.07261
ACVR1B	0.627429	0.435654	1.14873	0.978811	1.18951	1.02472							WDR75	-3.33839	-4.51975	-1.18136
ACVR1C	1.29725	1.24387	1.1154	1.29191	1.09697	0.931682
ACVR2B	0.50217	0.723686	0.124357	-0.0349103	0.333152	0.19589
ACVRL1	0.524375	0.583432	0.933545	1.4626	1.48971	1.73946
ADA	0.523827	0.524189	1.65452	1.5959	1.09503	1.31812
ADAM10	1.36422	1.47687	0.382847	-0.0505039	-0.693331	-0.192161
ADAM12	-0.214822	0.0519078	-1.87039	-2.30154	-1.1644	-1.11897
ADAM17	0.545756	0.536467	-0.203985	-0.740276	0.0001338	-0.829982
ADAM33	0.348517	0.318491	-0.434187	-0.47487	-0.299311	-0.592987
ADAM8	0.133327	0.248206	0.288255	0.538668	0.375091	0.341138
ADAM9	-1.1727	-0.898446	0.274618	0.143586	0.49596	0.56934
ADAMTS1	0.279452	0.269382	0.435418	0.961883	-0.132481	-0.124246
ADAMTS4	-0.0517485	-0.247431	0.700271	0.324998	0.495876	0.682028
ADAMTS5	0.0175366	0.280863	0.0815708	0.498144	0.843871	0.431421
ADCY5	1.08583	1.22035	0.203941	0.266569	0.732626	1.05091
ADCY6	0.694556	1.19066	0.453802	0.254557	0.332029	0.493173
ADCYAP1R1	0.477112	0.305661	0.265827	0.594993	-0.400353	0.00551296
ADGRG3	0.54581	0.627795	-0.0085818	-0.497239	-0.309587	0.102791
ADH1A	-0.210186	-0.108054	-0.185282	0.429976	0.0642043	-0.0286442
ADH1B	0.592748	0.628215	-0.279861	0.297806	0.306126	1.0222
ADH1C	-0.7879	-0.598805	0.199708	-0.376626	-0.954406	-0.20826
ADK	-1.02256	-1.2314	-1.04666	-1.05829	0.00832693	-0.0589358
ADORA1	0.800071	1.04648	0.0447062	-0.396959	0.166332	0.273616
ADORA2A	-0.274228	-0.171413	-0.381029	-0.559998	-0.256279	-0.492695
ADORA2B	-0.53926	-0.85841	0.317385	0.675172	0.656679	0.617801
ADORA3	0.38146	0.263545	0.323177	-0.148856	-0.116603	0.303671
ADRA1A	0.866691	0.84178	-0.0379262	-0.0942061	-0.27246	-0.233874
ADRA1B	0.0760948	0.370091	0.346521	0.266748	-0.11764	0.0360742
ADRA1D	0.631881	0.510846	1.72328	0.979247	1.01498	1.07695
ADRA2A	-0.425388	-0.202347	2.01658	1.71161	1.03508	1.24635
ADRA2B	0.571581	0.63482	0.203295	0.319843	0.63004	0.563162
ADRA2C	0.803998	0.696088	1.14291	1.14716	1.51785	1.119
ADRB1	0.32689	0.300271	1.14875	1.05346	1.18302	1.2165
ADRB2	0.703707	0.550243	0.0301377	0.231489	0.648092	0.550295
ADRB3	0.0435011	0.044868	-0.0481629	-0.0463133	0.0254927	0.0329874
ADRM1	0.447419	0.38608	1.11634	0.782936	0.304779	0.543894
AGER	0.631426	0.76612	1.91338	1.57237	1.85864	1.76374
AGRP	0.165729	0.253287	0.726195	1.11997	0.601438	0.538
AGTR1	0.959154	1.09244	0.798019	0.934895	1.31046	1.58161
AGTR2	0.673218	0.706357	1.15335	1.10213	0.345687	1.29203
AHCY	-2.71465	-2.63729	-3.58715	-3.4038	-3.21092	-3.50773
AKR1A1	1.0172	0.865108	0.359408	-0.0746877	-0.0111308	0.192379
AKR1B1	0.198639	0.127934	2.04024	2.01918	2.05829	1.60437
AKR1C3	1.43956	1.27259	0.798429	1.04531	1.15809	0.875935
AKT1	1.15994	1.39818	0.122546	1.0916	0.340034	0.46979
AKT1S1	0.0642755	0.209777	-0.163289	0.630446	0.446137	0.196162
AKT2	-1.25003	-1.16215	0.0830178	-0.714828	0.349458	0.32331
AKT3	-0.730936	-0.501124	-1.81881	-1.9075	-2.027	-1.80529
ALAD	-1.54301	-2.21842	-0.971295	-0.185985	0.453786	0.456118
ALDH2	0.521022	0.584761	0.166214	0.274983	-0.0557343	0.429844
ALDH5A1	0.873756	1.11579	0.854642	0.8129	0.539097	0.92031
ALG2	-2.27193	-2.64669	-2.49234	-1.47044	-2.5106	-2.47978
ALK	-0.692785	-0.66929	-0.0929596	0.262778	-0.278197	-0.287197
ALMS1	-0.735356	-0.581028	0.673005	0.504361	-0.418799	0.742941
ALOX12	0.153497	0.178785	-0.183613	0.0752456	-0.0506042	-0.0842494
ALOX15	-0.639011	-0.947676	0.429492	0.163792	-0.55123	-0.734951
ALOX15B	-0.0515648	-0.0549414	-0.349718	-0.602822	-0.458603	-0.13139
ALOX5	-0.0151105	0.0582922	1.40653	0.869837	1.11042	1.15467
ALOX5AP	0.0603711	0.00618672	-0.692731	-0.448406	-0.913691	-0.298809
ALPL	0.995688	1.16444	1.2206	1.2239	0.766938	0.888787
AMH	0.277023	0.362143	-0.25334	-0.953718	-1.02763	-0.215984
AMY2A	0.377248	0.355564	-0.9103	-0.690447	-1.2862	-0.438475
ANGPT1	-0.437978	-0.424177	0.498979	0.581547	0.689001	0.815594
ANGPT2	-0.115181	-0.0065345	-0.365833	-0.299422	0.656644	0.332495
ANO1	-0.56784	-0.286394	-1.09513	-1.11551	-1.6551	-2.66719
ANPEP	-0.0982633	-0.219233	-1.22708	-1.73032	-0.728968	-0.744713
ANXA3	-0.502763	-0.404694	1.02171	0.608224	0.477782	0.472759
ANXA5	1.61685	1.52963	0.820123	0.79781	0.976195	1.10104
AOAH	0.312512	0.710923	-0.75985	-1.37085	-0.819631	-0.554169
AOC3	0.244173	0.0456996	-0.24082	0.305746	-0.353671	-0.451615
AOX1	0.00645378	0.00954935	-1.39044	-0.731007	-1.72818	-0.467769
APCS	-0.177343	-0.507338	0.267135	0.523943	-0.322321	-0.160087
APEH	-0.343006	-0.115093	-1.06677	-0.441075	-0.846158	-0.441454
APH1A	-0.664021	-0.578903	-0.545073	-0.642597	-0.272177	0.0386611
APH1B	-0.160751	-0.278001	0.725846	1.2248	0.813654	1.37847
APLNR	-0.97011	-0.887476	0.912028	0.558498	0.834295	1.26553
APOB	-0.152515	0.271063	-0.597608	-0.394549	-0.644031	0.150963
APOH	0.498004	0.414613	0.946998	1.03088	1.36029	0.834291
APP	-0.622267	-0.851038	0.200706	0.225079	0.894675	0.149697
AQP1	1.03893	0.679236	1.69985	1.56541	1.32608	1.18952
AQP10	0.489788	0.272725	0.586467	0.604617	0.898308	0.753977
AQP2	0.185644	0.16891	-0.0037886	0.114519	0.441406	0.179798
AQP3	0.440867	0.322134	0.240396	-0.0496727	0.338136	0.832258
AQP5	0.998273	1.12274	0.930297	1.21557	2.11876	1.54628
AQP6	0.798087	1.29716	0.541459	0.183129	0.844977	0.732219
AQP7	-1.43962	-1.71999	-2.28312	-1.94372	-1.8299	-1.6383
AQP8	0.440463	0.584954	1.4688	1.63542	1.51241	1.95635
AQP9	-0.600758	-0.547047	0.245511	0.381888	1.42677	1.50757
AR	0.663253	0.518664	0.16333	-0.151481	0.65014	0.528156
ARAF	0.28218	0.164532	-0.0712249	-0.060289	0.509675	0.00456931
ARG1	-0.0695618	0.12693	0.821894	1.09877	0.188531	0.0394875
ARG2	0.648411	0.315228	1.27363	1.80715	1.84723	1.38468
ART1	0.270805	-0.0644928	-0.251604	0.653882	1.11755	0.206644
ATAD2	-0.416334	-0.606984	-1.16683	-1.60135	-1.89434	-1.28844
ATAD2B	0.793391	1.03318	-0.921055	-0.775152	-0.671823	-1.1926
ATM	-1.35908	-0.869873	-0.706771	-0.176936	-0.433654	-0.55669
ATP1A1	-2.70723	-3.33591	-1.54026	-1.99659	-3.13616	-1.7455
ATP1A2	-0.778314	-1.26874	-1.91717	-1.12216	-0.988711	-1.67833
ATP1A3	-0.921835	-0.877662	-0.64517	-0.51889	-0.402682	-0.865
ATP1A4	-0.344689	-0.356426	1.16572	0.919982	1.05335	0.92778
ATP1B1	-0.542906	-0.595665	-0.110561	0.229565	-0.14123	0.250368
ATP1B2	0.496982	0.849948	-0.188949	0.847439	-0.323418	-0.298499
ATP1B3	0.42459	0.623735	1.42691	2.03141	1.96424	2.07846
ATP2A2	-3.02248	-3.03392	-0.965769	-1.32969	-0.854586	-1.48313
ATP4A	-1.17512	-1.36274	-1.34386	-2.13191	-1.78148	-1.60645
ATP4B	0.644244	0.232	0.396617	0.556794	0.687531	-0.102101
ATP6AP1	-1.50552	-1.25597	-2.39165	-2.3041	-1.54418	-0.90695
ATP6V0C	-1.85207	-3.25692	-1.93612	-2.29585	-3.36376	-2.46501
ATP6V1A	-3.24496	-3.89388	-2.25441	-2.06996	-2.37796	-2.31714
ATR	0.00022192	-0.715214	0.115736	-0.769201	-0.901473	-0.704763
AURKA	-0.634759	-0.244819	-2.61686	-1.10321	-1.22546	-1.42439
AURKB	0.524389	1.14844	-0.960316	-1.36803	-1.62187	-1.70016
AURKC	-0.210245	-0.299646	-0.431535	0.165946	0.66709	0.205665
AVPR1A	0.535577	0.251543	0.582655	0.579043	0.202003	0.32556
AVPR1B	1.05087	0.677134	0.620627	-0.22478	-0.206611	-0.824621
AVPR2	0.96346	0.782104	0.669412	0.308116	0.26978	0.830253
AXL	0.86173	0.922213	0.133706	0.196988	0.232973	0.29323
BACE1	0.536846	0.318257	0.0964462	0.264932	-0.27867	0.206243
BACE2	0.615255	0.505975	0.192961	0.68304	0.726847	0.725396
BANF1	0.532967	0.662086	0.339202	1.10609	0.26542	0.741408
BAX	0.113735	0.303153	0.717871	1.03423	1.63557	1.50515
BAZ2A	0.339924	0.39403	-0.402163	-0.222411	-0.225378	-0.346325
BAZ2B	0.324096	0.00944786	0.99746	1.02	1.039	0.959103
BCAT2	1.52376	1.27777	1.25234	1.26534	1.12768	0.568916
BCHE	0.719943	0.952759	1.51585	0.860694	1.05698	1.34215
BCL2	0.792874	0.545623	1.41605	1.08015	0.851249	0.811494
BCL2A1	0.460801	0.585498	1.09868	1.75162	1.96797	1.30555
BCL2L1	0.00942995	0.371084	-1.12165	-1.00975	-0.421239	-0.256774
BCL2L10	0.494494	0.504372	0.513844	0.272323	0.61043	0.475256
BCL2L2	0.475337	0.245006	0.888704	0.376298	0.757695	1.06583
BCR	0.453749	0.285563	0.0784823	-0.582572	-0.0211971	-0.112432
BDKRB1	0.133852	-0.1406	0.516571	0.240628	1.02232	0.654161
BDKRB2	-1.18227	-1.43651	0.742987	1.0912	0.401452	0.877797
BIRC2	-0.532698	-0.453585	0.531641	0.561935	-0.202715	-0.114585
BIRC3	0.634492	1.04538	0.222705	0.504818	0.445241	0.356834
BIRC5	-1.38249	-1.21915	-2.4365	-1.77192	-2.56045	-1.70954
BIRC7	1.22441	0.959229	-0.283883	0.0263045	-0.060619	-0.0228862
BLK	0.208864	0.296447	0.510581	1.09196	0.656106	1.01063
BLVRB	0.792078	0.795388	-0.0473324	0.316723	0.082911	0.560994
BMP1	-0.0058928	-0.144955	0.192008	0.26243	1.09246	0.227666
BMP10	-0.407594	-0.300611	0.130698	0.225705	0.17354	0.464761
BMP2K	0.989501	0.908019	0.672134	0.336316	0.805957	1.03464
BMPR1A	-3.27441	-3.32709	-2.3856	-1.6142	-2.25855	-3.03646
BMPR2	0.0142776	0.0496712	0.383178	1.05259	0.590306	0.372046
BMX	0.456968	0.179139	-0.0995322	0.256153	0.0373414	-0.296407
BPTF	0.800717	1.1615	-0.73919	-1.52316	-1.60313	-1.68827
BRAF	1.08073	1.35499	2.57574	2.65211	0.641801	0.625511
BRD1	-0.843464	-0.976534	-0.744578	-0.564418	-0.281057	0.265251
BRD2	-1.05719	-1.00924	-0.297061	-0.168645	-0.898844	-0.910513
BRD3	-0.595743	-0.633606	0.751385	0.213969	0.0765002	0.560107
BRD4	-0.529346	-0.324113	-1.64115	-1.19022	-2.71322	-1.50821
BRD7	0.562999	0.703984	-0.176173	-0.29833	0.0868061	0.295469
BRD9	0.634784	0.603942	-0.054299	-0.215926	-0.501416	-0.535443
BRDT	0.199856	0.343732	-0.0127522	-0.487421	0.330404	0.468801
BRS3	-0.0596648	-0.139269	0.580431	-0.182228	-0.345641	0.172517
BRSK1	-0.0999271	-0.214355	-0.636025	-0.10883	-0.208934	-0.164862
BRSK2	-0.349099	-0.367269	0.0762633	-0.322341	-0.714644	-0.749211
BTK	0.493822	0.578308	-0.143028	0.0473936	-0.252916	-0.149717
BUB1	-0.274759	0.281551	-0.444811	0.324815	0.327433	0.251481
C1QB	0.209822	0.397782	1.28478	0.106784	0.460787	0.115311
C1S	0.535578	0.256878	0.981963	1.12962	1.49637	1.41637
GATD3	0.35239	0.0919744	-0.28324	-0.254968	-0.219922	0.00133051
C3AR1	-1.36602	-1.4698	-0.62045	-0.611778	0.487068	0.464681
C5	-0.750505	-1.02296	0.00578678	-0.466383	0.249212	0.833733
C5AR1	0.0493321	0.0496443	-0.049716	-0.0450152	0.0232588	0.0291766
C5AR2	0.999788	0.948101	-0.672443	0.0321676	-0.44175	-0.862158
C6	-4.6e-05	0.0360579	0.485918	0.757131	1.40779	1.04567
C7	0.225631	0.0341654	-0.0248008	-0.542323	-0.546562	-0.781992
C8G	1.14427	0.967205	-0.371801	0.35601	0.540884	0.552762
AOPEP	0.320112	0.705069	0.996399	0.206331	0.370694	0.597539
CA1	0.0096735	-0.113055	0.491385	0.830655	1.44047	0.329906
CA12	-0.356682	-0.0570917	1.20659	1.13361	0.819636	0.999778
CA13	0.935352	1.37216	0.445174	1.01273	1.54631	1.20958
CA14	0.256692	0.57156	0.355118	0.439019	0.749569	0.385688
CA2	-0.240668	-0.134341	-0.371127	-0.0754067	-0.294512	-0.093303
CA3	0.691157	0.948228	0.0190577	0.236957	-0.438876	0.0341218
CA4	0.415233	0.453791	-0.565843	-0.356485	-0.685746	-0.534098
CA5A	-0.753527	-0.855669	-1.17015	-1.01741	-1.40746	-0.5133
CA5B	1.36467	0.879472	-0.153639	0.363883	0.89497	0.277869
CA6	-0.429009	-0.251668	-0.530904	-1.14689	-0.426363	-0.665995
CA7	-0.348073	-0.520888	1.12673	0.941822	0.657824	0.910103
CA9	0.589428	0.189309	-0.503695	0.671867	0.175854	0.582635
CACNA1A	-0.186439	0.128384	-0.0635098	-0.115428	-0.52926	-0.541103
CACNA1B	0.0727132	0.0162486	0.771356	0.176234	-0.0363013	0.521528
CACNA1C	0.289834	0.397851	1.33457	1.56906	1.3338	1.26412
CACNA1D	0.063972	-0.0400967	0.628765	0.0479218	1.17691	0.68384
CACNA1E	0.103288	0.44367	0.374309	0.436177	0.342193	0.338328
CACNA1F	0.0547494	-0.104708	-0.317494	0.185837	-0.0986164	-0.196371
CACNA1G	0.0919544	0.173041	0.209219	0.394187	0.211167	0.7293
CACNA1H	0.0965894	0.532819	0.834905	0.937744	0.742172	0.769988
CACNA1I	-0.659602	-1.16962	-1.29812	-0.679063	-1.30184	-1.03036
CACNA1S	0.527941	0.809308	0.0735883	0.121493	0.210529	0.175318
CACNA2D1	-0.146646	-0.599487	0.794865	1.44785	1.12797	1.34134
CACNA2D2	0.00783116	0.210966	0.246769	0.120025	-0.0403128	-0.245272
CACNA2D3	0.569122	0.778888	1.03643	1.255	1.29579	0.866412
CACNA2D4	0.0553721	-0.145229	0.865398	0.799539	0.55212	0.693158
CACNB1	0.264551	0.166787	-1.75151	-1.57287	-1.21677	-1.22731
CACNB2	-0.0368905	0.292974	0.689629	1.44865	1.02517	1.23983
CACNB3	1.07392	1.08317	0.534235	0.392097	0.714806	1.01369
CACNB4	-0.340581	0.0176086	0.149852	0.676774	0.623673	-0.136863
CACNG1	0.167699	0.317012	-0.322814	-0.649585	-0.0700966	0.0510654
CACNG2	0.0398519	0.159359	-0.0898595	0.31622	0.830611	-0.168776
CACNG3	0.20908	0.211857	0.333523	0.578826	0.47601	0.806308
CACNG4	0.364604	0.467228	0.924003	1.78392	1.10443	1.4128
CACNG5	0.724711	0.507828	1.35858	1.13447	1.53058	1.43528
CACNG6	0.75191	0.571469	-0.226887	-0.429312	-0.235183	-0.114056
CACNG7	0.423126	0.619382	-0.141684	-0.119083	0.864341	0.433178
CALCA	-0.179089	0.273498	0.437529	0.701078	-0.146536	0.29195
CALCB	-0.678523	-0.476803	-0.420713	-0.62577	-0.50686	-0.0133459
CALCRL	-0.121562	-0.231393	-0.582527	-0.278497	0.0469751	-0.582535
CAMK1D	0.505174	0.679493	1.85653	1.30128	1.77895	1.05815
CAMK2B	0.595971	0.754643	1.3069	1.19927	0.907268	1.05158
CAMK2D	0.635922	0.514049	-0.281751	-0.331101	0.322059	-0.357218
CAMK2G	-0.198193	-0.246623	0.507534	-0.0187484	0.438903	0.105041
CAMKK1	0.380639	0.344664	0.00606458	0.164113	0.344843	0.288853
CAMKK2	0.188803	0.195283	-0.856255	-1.49926	-0.990119	-0.473366
CAPN2	0.957848	1.15115	2.23572	2.12225	1.43958	1.92147
CARM1	-0.314619	-0.563661	-1.4545	-0.0991165	-1.72958	-1.36652
CASP1	-0.423707	-0.356834	0.043498	-0.513891	0.143892	0.284644
CASP10	-0.37586	-0.244819	-0.118194	-0.832091	-1.6646	-0.323798
CASP14	1.14854	1.1826	1.62397	1.66546	0.753437	1.47877
CASP2	0.0967887	0.174605	0.615225	1.53636	1.58109	0.652722
CASP3	-0.229371	-0.539554	-0.858706	-1.37335	-0.366678	-0.987561
CASP4	0.337895	0.0558015	-0.29813	-0.269289	-0.148884	0.0661554
CASP5	0.65137	0.848056	0.881929	0.382803	1.13052	0.417231
CASP6	0.204617	0.12009	0.261867	0.473807	0.73393	0.890958
CASP7	-0.889527	-0.791304	0.251376	0.573063	0.419989	0.231203
CASP8	-1.46745	-1.35875	-1.01095	-0.985249	-1.19613	-0.426366
CASP9	-0.821936	-0.460756	0.165833	-0.267355	-0.171061	-0.71056
CASR	0.293946	0.0286744	-0.555386	-0.323852	-0.0594534	-0.288893
CBR1	-0.486344	-0.434928	-0.280226	-0.362868	-0.460753	-0.839515
CBS	1.23697	1.17644	0.282525	0.762072	0.636024	0.856973
CBX4	0.741432	0.77578	-1.06334	-0.677101	-0.641885	-0.829199
CCKAR	0.025112	0.123059	1.36286	1.18796	1.11174	1.07626
CCKBR	0.410263	0.996485	-0.0348259	0.00808857	-0.598844	-0.224862
CCL11	1.10745	1.10605	2.36643	2.28657	2.36475	2.05136
CCL2	1.21074	0.763074	0.414989	0.377257	-0.307666	0.564307
CCND1	-3.57949	-2.30398	-2.8188	-3.52562	-3.67794	-5.44597
CCR1	0.651997	1.1267	1.79318	1.02997	0.84552	1.40686
CCR2	0.281949	0.698841	1.50388	1.29516	0.961173	1.10756
CCR3	1.3414	1.13419	1.09645	1.68603	1.54036	1.69587
CCR4	0.0201659	-0.171711	0.352101	-0.125015	0.0513362	0.150339
CCR5	0.0711862	0.073414	-0.0258776	-0.0200953	0.0502829	0.0561923
CCR8	0.0524686	-0.107154	-0.345427	-0.162986	-0.220158	-0.179484
CCR9	0.736206	0.324287	1.43581	0.433897	1.37754	0.605038
CCT2	-1.97734	-2.40056	-3.63347	-2.58655	-2.42957	-3.10308
CD14	0.528263	0.717283	0.764794	1.05375	0.466202	0.980789
CD2	0.31588	-0.0462793	-0.844849	-1.00028	-0.804461	-0.208196
CD200	-1.43842	-1.00639	-0.921338	-0.476077	-0.96397	-1.03884
CD248	-1.60095	-1.43928	-1.525	-0.743083	-0.533343	-0.810461
CD274	0.354487	0.206157	0.0247178	0.0373211	-0.540939	-0.422842
CD28	0.453497	0.0457398	-1.67368	-0.868859	-1.76656	-0.446596
CD38	-0.87654	-1.07832	-0.403536	-0.607847	-0.0026733	-0.143284
CD3D	0.558729	0.558108	-1.10553	-1.6757	-1.47212	-1.53033
CD3E	0.689566	0.343673	1.02605	0.810787	0.0778502	0.296039
CD3G	0.20481	0.275593	2.00644	1.43677	1.214	0.707158
CD4	0.732306	0.305493	0.227736	0.838846	0.303212	0.826441
CD40	-0.622636	-0.575318	-1.1982	-1.17986	-1.3731	-1.00879
CD40LG	1.11534	1.11389	-1.13541	-1.5244	-0.48584	-0.315742
CD52	0.301888	-0.0102743	1.14237	0.315347	0.606811	0.605435
CD74	1.06422	1.14631	2.24642	2.62543	2.08037	2.15343
CD80	-0.339927	-0.48604	-0.492948	-0.341575	0.16594	-0.227987
CD86	0.367625	0.342888	0.309104	-0.129191	0.671642	0.219955
CDC42BPA	0.035991	-0.2637	0.611666	0.569437	0.71447	-0.130762
CDC42BPB	-0.13166	-0.383943	0.900685	0.734883	0.819807	0.982057
CDC7	-2.32314	-1.23262	-3.31132	-3.28624	-3.60796	-3.16943
CDK1	-0.36119	0.304222	-1.70517	-3.71542	-2.02513	-1.52576
CDK10	-1.17094	-1.12125	-1.45053	-1.54813	-0.216628	-0.794998
CDK11B	-0.650262	-0.396685	-0.237275	-0.185688	-1.19352	-0.923887
CDK12	-0.329872	-0.343156	-0.598075	-0.485165	0.567659	0.158075
CDK13	-1.61031	-1.43177	-1.13557	-1.21953	-1.42993	-0.768336
CDK14	-0.542488	-0.451153	0.889555	0.948154	0.966851	1.38983
CDK15	0.404561	0.253382	-0.688501	-0.481765	-0.829764	-0.328583
CDK16	-0.260931	-0.300725	0.193306	0.220148	-0.231043	0.0486134
CDK17	-0.128285	0.0309067	-1.65136	-1.49916	-1.40648	-1.33501
CDK18	0.555281	0.368885	-0.892756	-0.130727	-0.20603	-0.354748
CDK19	0.573526	0.477356	1.2306	0.971537	0.119233	0.416208
CDK2	-1.35662	-1.17983	-1.82983	-2.05988	-2.04838	-2.2834
CDK20	-0.11431	-0.0839146	0.530128	0.622883	1.10978	1.09908
CDK3	0.395497	0.182694	-0.0309119	-0.175245	0.3978	0.0907777
CDK4	-0.18886	-0.0326056	0.766121	1.12218	0.0503284	0.0718388
CDK5	0.401251	-0.0161745	0.297983	1.06364	0.386283	1.00689
CDK6	0.501693	0.621746	-0.695141	-0.184499	-1.41843	-0.638676
CDK7	-2.92789	-2.67371	-1.79822	-0.312812	-0.730479	-0.218308
CDK9	-1.99805	-2.81779	-3.30478	-2.7157	-2.6992	-3.07366
CDKL1	-0.430687	-0.32225	-0.308804	-0.0114529	-0.297531	-0.0502098
CDKL2	-0.763357	-0.725564	1.27597	0.674886	0.227303	0.266446
CDKN1A	1.28898	1.55329	0.299175	0.40665	0.307472	1.17045
CDKN3	-0.697551	-0.742488	-1.27297	-1.32529	-1.30885	-1.56996
CDS1	1.11487	0.901604	0.443405	0.826454	0.124732	0.693978
CECR2	-0.224104	-0.565133	0.877863	1.06176	0.830306	0.794406
CELA1	0.222808	-0.264593	0.622551	-0.118665	-0.210547	0.411075
CENPE	0.406859	0.777532	0.880081	0.936475	1.55373	0.788809
CERK	0.988937	0.849986	1.13751	2.17918	1.86625	1.77737
CES1	0.939572	0.298662	0.494119	0.740116	0.549559	0.399586
CETP	1.12844	0.775977	0.394314	-0.0322545	1.45892	1.33484
CFB	0.631966	0.599531	-0.191642	-0.479669	0.0202292	-0.676423
CFD	1.10964	0.944091	1.0672	1.16056	0.792841	1.23389
CFTR	-0.242582	-0.499259	-0.778672	-1.22257	-1.04883	-0.755136
CH25H	-0.208861	-0.12904	0.616906	0.709368	0.997734	1.12261
CHEK1	-2.61184	-2.39387	-3.60826	-1.81207	-3.3606	-3.00723
CHEK2	0.382906	0.522645	2.12949	1.99162	1.78223	1.5866
CHKA	-0.818894	-0.908308	-0.794284	-1.63092	-1.60222	-1.42887
CHRM1	0.211496	0.129706	0.336618	0.0650855	-0.0209742	-0.143222
CHRM2	-0.215815	-0.262006	-0.314191	0.293644	0.178812	0.198263
CHRM3	-0.424023	0.0431052	-0.217036	-0.122752	0.112324	-0.498368
CHRM4	0.568161	0.365449	1.86345	1.42394	1.30834	0.671184
CHRM5	-0.585307	0.162119	-0.358618	-0.194897	-0.555989	-0.56594
CHRNA1	0.226447	0.272543	0.153819	0.882658	1.28021	1.10952
CHRNA10	0.232947	0.718054	1.10022	0.926417	0.410133	0.50017
CHRNA2	1.68208	1.49108	0.50187	0.377042	0.800507	0.891497
CHRNA3	0.312853	0.322368	-0.0633491	0.214527	0.331438	-0.0378262
CHRNA4	0.500934	0.500388	-0.2627	-0.323713	-0.165787	-0.198764
CHRNA5	0.546702	0.846449	-0.410695	-0.0783202	0.0712654	-0.332898
CHRNA6	0.454412	0.327814	-0.034556	0.111966	-0.0519637	-0.297854
CHRNA7	-1.07036	-1.10797	0.972863	1.30297	-0.0602178	0.214631
CHRNA9	-0.436854	-0.286658	-0.0582768	0.259062	0.520096	-0.605358
CHRNB1	0.258672	0.435161	-0.314761	-0.291771	-0.647446	-0.197288
CHRNB2	0.64785	0.833252	-0.672293	-0.495394	-0.862594	-0.890911
CHRNB4	0.244146	0.151792	-0.286061	-0.262151	-0.076243	-0.278191
CHRND	0.414759	0.527734	1.06692	1.03191	0.813206	0.786318
CHRNE	0.459419	0.530789	1.29194	1.22163	1.7236	1.80233
CHRNG	-1.14518	-1.5061	-1.7949	-1.46359	-1.95472	-1.42908
CHUK	-0.951516	-0.717311	-0.0796966	-0.22575	-0.0344314	-0.301832
CIAO1	-2.11908	-2.01876	-1.5915	-0.607485	-1.8139	-1.22559
CLEC4C	1.33519	1.11292	1.00235	0.244549	0.238328	0.795108
CLK1	-0.631823	-0.635613	-1.05148	-1.25505	-0.917331	-1.19189
CLK2	-1.05659	-1.46126	1.29605	1.10219	1.32554	1.52537
CLK3	-0.315721	-0.577173	-0.996915	-0.845384	-0.83862	-0.708135
CLK4	-0.916315	-0.561393	-0.491424	-1.17707	-1.03529	-1.39454
CLU	0.0109695	-0.170757	0.38902	0.924783	0.793408	1.08559
CMA1	0.350694	0.230154	-1.85847	-1.62104	-1.53644	-1.1166
CNGA3	-0.351877	-0.575371	-0.0421932	0.263961	-0.433154	-0.680272
CNR1	0.307412	-0.246161	0.153831	-0.586376	-0.353605	-0.722247
CNTN1	0.0691982	-0.0095955	0.310538	0.219629	0.892667	0.743224
COL4A5	1.16543	1.09208	1.67179	1.64634	1.4211	1.24321
COMT	0.288941	0.273047	0.940578	0.129338	0.431196	0.627145
COPS6	-0.966264	-0.792331	-0.945004	-2.78139	-0.678301	-1.40845
CPA1	0.328928	0.451116	-0.202644	-0.658769	-1.02554	-1.19935
CPB1	0.929587	0.760155	-0.927886	-0.516316	-0.921393	-0.555671
CPB2	-0.0814723	0.159657	-0.623097	-0.482149	-0.499772	-0.399056
CPM	-0.23847	-0.124508	0.95271	0.106045	0.227662	0.393974
CPN1	0.281849	0.268125	1.01223	0.640059	0.538278	1.02302
CPT1B	-0.334207	-0.694223	-1.16569	-0.566795	-0.0882691	-0.311309
CPT2	-1.04801	-1.32922	0.544196	-0.155267	0.868268	0.752473
CRBN	-0.529927	-0.67851	0.0985683	-0.10214	-0.544172	0.0310918
CREBBP	-0.164846	-0.488307	-0.146872	-0.596635	-0.929024	-0.490521
CRHR1	0.781758	0.813583	-0.219793	-0.357387	-0.586341	-0.527716
CRHR2	0.46761	0.464299	0.0678735	-0.170467	0.165746	-0.145344
CSE1L	-2.0171	-2.11088	-2.23912	-3.637	-2.8532	-1.51276
CSF1	1.24268	1.163	0.82448	0.665746	1.55509	0.662858
CSF1R	0.267696	0.181916	-0.315903	0.241498	0.692476	0.0404568
CSF2	0.431915	0.152901	0.525658	0.655171	0.563706	0.233179
CSF2RB	0.949213	1.14767	1.44336	1.38846	1.35482	1.39575
CSK	-0.373208	-0.377345	-1.45952	-1.48907	2.04241	2.50821
CSNK1A1	-2.06858	-1.8977	-3.68269	-4.12955	-3.05317	-3.65107
CSNK1D	-0.242449	-0.014308	-1.0427	0.194529	-0.385099	-0.033667
CSNK1E	-0.318584	-0.0729877	-0.0811774	0.0615512	-0.407474	-0.290911
CSNK1G1	0.235837	0.16734	0.43438	0.975574	0.831856	0.891635
CSNK1G2	0.0850753	0.0398434	1.6394	1.65095	1.23563	1.14572
CSNK1G3	0.117601	-0.167662	-0.691789	-0.60856	-0.597997	-0.718433
CSNK2A1	-1.56864	-1.65256	-0.144374	-0.753972	-1.19026	-0.282787
CSNK2A2	0.266253	0.501432	1.1814	0.926097	0.941561	0.823231
CSNK2B	-1.20396	-1.34852	-0.416727	-0.009183	-0.311793	-0.210584
CSRP2	-0.0793939	0.0529719	0.916241	0.487735	0.976777	1.03665
CSTF1	-1.43858	-1.16164	-0.896535	-1.14276	-2.6332	-1.74417
CCN2	0.69008	0.701389	-0.441482	-1.08554	-0.819635	-0.616891
CTH	0.577381	0.684704	2.05656	1.75579	1.8549	2.09
CTLA4	0.900925	0.95236	1.59645	1.31467	1.69812	1.06699
CTRC	0.343498	0.521513	1.19525	0.0136518	0.215801	0.150281
CTSA	-0.740518	-0.810451	-0.247079	0.0609301	-0.581522	-0.772439
CTSB	1.10163	0.868967	1.1026	1.02057	0.966423	1.47541
CTSC	0.116672	0.164118	1.21436	1.51095	0.348813	1.43769
CTSD	0.849163	0.967031	-0.319682	-0.0804012	-0.576874	-0.314782
CTSE	0.0893097	0.105674	0.417922	0.2433	-0.702753	-0.0121012
CTSF	0.51641	0.36843	1.33735	1.41788	1.06499	0.09703
CTSG	0.0431136	-0.482093	0.00094381	-0.321194	-0.20452	-0.398091
CTSH	-0.601194	-0.532681	0.465347	0.21099	-0.457176	0.416645
CTSK	0.627935	0.593317	-0.747767	-0.72927	-0.724185	-1.27059
CTSL	-0.0916308	-0.270332	-0.11888	0.718098	0.727405	0.611566
CTSO	-0.89973	-1.19812	-0.759563	-1.36217	0.414472	0.134103
CTSS	-0.360293	-0.314407	0.656908	0.564493	0.161612	-0.0303258
CTSV	-0.270984	-0.337859	0.724157	0.865747	0.891613	1.20522
CTSZ	-0.392422	-0.315287	0.337984	-0.12367	-0.0183637	-0.200411
CUL4A	0.577513	0.804143	0.418433	0.127683	0.591236	0.696207
CXCL10	0.455524	0.235483	-0.0471296	-0.350548	0.0492636	0.0601054
CXCL8	1.17954	1.22695	1.09896	0.845124	1.74482	1.5229
CXCR1	-0.469689	-0.463369	-0.312749	-0.03974	-0.243061	-0.227396
CXCR2	0.634813	0.57536	0.576263	1.01692	0.298163	1.1141
CXCR3	1.37645	1.14026	0.606694	0.60715	0.622447	0.53566
CXCR4	-0.879281	-0.895941	-1.13004	-0.653164	-0.788652	-0.776492
CYP11A1	-0.0909667	-0.148133	-0.374915	-0.276141	-0.258074	-0.449222
CYP11B1	0.411492	0.466692	0.693115	0.832487	0.574044	0.917652
CYP11B2	0.508237	0.563288	-0.006006	0.277684	0.374671	0.704263
CYP17A1	0.854707	0.654572	0.156724	0.070193	0.608417	0.819278
CYP19A1	0.0798291	0.30486	-0.186035	0.630431	0.150627	1.01992
CYP1A1	0.957264	0.59302	0.930132	0.297995	1.20849	0.711598
CYP1A2	0.00564978	0.0839969	-0.417939	-0.118922	-0.811334	-0.431712
CYP1B1	1.12456	1.08465	0.532327	1.14846	0.838927	0.795764
CYP24A1	-1.26058	-1.00958	-0.369131	-0.629415	-2.15878	-0.634713
CYP26A1	-0.691063	-0.501694	-0.625158	0.0130597	-0.156399	-0.162418
CYP27A1	1.22824	1.4053	0.975275	0.958432	1.39403	1.05746
CYP27B1	0.863104	0.66133	0.711	1.13036	0.630574	0.640069
CYP2A6	-0.220625	-0.167625	-0.294118	-0.486072	-0.66549	-0.553375
CYP2B6	0.159659	0.385258	0.47953	-0.0464506	-0.544358	0.164029
CYP2C18	-0.412782	-0.479417	-0.0042696	-0.536864	0.420568	-0.266
CYP2C19	-0.000152	-0.11408	-0.0309576	-0.612981	-0.307917	-0.256543
CYP2C8	-0.225224	-0.406706	-0.456474	-1.01073	-0.211729	-0.736641
CYP2C9	0.248798	0.0456893	0.138446	0.628771	-0.262455	-0.588963
CYP2D6	0.791632	0.766011	-0.852429	-0.2349	-0.110054	0.0124545
CYP2E1	0.0478298	0.233425	0.93558	0.901675	0.361996	0.935717
CYP2J2	0.0528858	0.0549594	-0.0456801	-0.0426297	0.0294791	0.0341927
CYP3A4	0.648876	0.205912	0.923644	0.404391	0.676799	0.738755
CYP3A43	0.388981	0.252044	0.63826	1.17501	0.825508	0.915777
CYP3A5	-0.457606	-0.247114	0.35533	-0.152083	0.485939	0.229127
CYP3A7	-0.0269195	-0.410971	0.145957	-0.653242	-0.599394	-0.253415
CYP4F2	0.400784	0.306726	-0.145915	0.471269	0.068606	0.104812
CYP51A1	0.613932	0.549443	-0.228533	-0.14507	0.13497	-0.040647
CYSLTR1	0.284688	0.390779	1.18529	1.25525	1.27375	1.51956
CYSLTR2	1.23332	1.30599	-0.152638	0.0946645	0.790345	1.14175
DAPK1	0.616536	0.510202	0.14114	0.145187	0.506617	0.849252
DAPK3	0.437713	0.423992	0.684246	0.708138	0.878783	1.1221
DCLK1	1.28755	1.26022	-0.949822	-0.368096	-0.122938	0.0554536
DCLK2	1.03636	0.947772	1.09808	0.986027	1.28988	1.07261
DCLK3	-0.930613	-0.65395	-0.794578	-0.125566	-1.43623	-0.985076
DCPS	-1.35505	-1.86463	-2.73775	-2.02461	-2.37573	-1.97882
DDAH1	0.580348	0.361609	1.43709	1.50722	2.00574	1.13883
DDB1	-0.752665	-1.26615	-2.33601	-2.99952	-1.81505	-1.6702
DDC	-0.306856	-0.298233	-0.424184	0.326143	-0.682166	-0.453712
DDR1	0.202326	-0.0078728	-0.397672	-0.774231	-0.261226	-0.622214
DDR2	1.01293	1.08394	0.820983	1.6449	0.775707	0.951469
DEGS1	-0.205849	-0.406084	-0.441845	-0.564548	-0.224478	-0.283671
DEPTOR	0.311191	0.319984	0.413219	0.918337	0.68733	0.5196
DGAT1	0.718994	0.775303	0.305044	-0.311772	0.376287	0.28749
DGAT2	-0.0299517	0.033763	-0.0718087	-0.298262	0.425147	0.761439
DHDDS	-2.42253	-2.13584	-3.13978	-2.47023	-2.55336	-2.79223
DHFR	-3.01349	-3.20784	-3.9786	-2.67525	-3.92465	-3.71465
DHODH	-0.491941	-0.541259	-0.6163	-0.630489	-0.495336	-0.608859
DHX15	-2.61016	-2.33491	-3.49893	-4.45859	-3.14512	-3.28151
DIO1	-0.12466	-0.163381	-1.00855	-0.0026461	-0.123038	-0.252319
DKK1	1.33315	0.796042	1.71021	1.98519	1.36622	1.02207
DLL4	0.302906	0.590546	0.903852	0.637569	0.598911	0.676598
DLX3	0.229891	0.339135	-0.754105	-0.690464	-1.32497	-0.256155
DMPK	0.353269	0.180867	0.109074	-0.124113	-0.164415	0.0249319
DNMT1	-2.98139	-2.86493	-0.414166	-1.16068	-0.311664	0.475356
DNMT3A	2.02115	2.2702	0.699603	0.741785	-0.115774	-0.0743191
DNPEP	0.858796	0.913233	-0.440855	0.783851	0.634719	0.70281
DOT1L	-0.371202	-0.380233	-0.595049	-1.14904	-1.39185	-0.905562
DPEP1	0.627919	0.647445	1.84076	0.930874	1.48469	1.46666
DPP4	-0.639304	-0.900369	1.27843	1.2801	2.22654	1.90925
DPP7	0.370039	0.483094	0.683374	0.115168	0.937573	0.730051
DPP8	-0.172435	-0.376678	0.0832658	0.488107	0.0654248	0.158213
DPP9	-1.14741	-0.882188	-1.43337	-1.65094	-0.950588	-1.82754
DRD1	-0.162685	-0.108593	-0.108077	-0.0899021	0.117992	-0.152577
DRD2	0.625443	0.620555	-0.0356453	-0.152612	0.904564	-0.0632108
DRD3	-0.869454	-0.992298	-0.304044	-0.0774588	-0.0582978	-0.15975
DRD4	1.43078	1.73949	1.59783	1.67759	1.95473	1.59056
DRD5	-0.295324	0.0434394	0.890603	1.27662	0.586739	0.383685
DYRK1A	-0.212025	0.0944281	-0.144826	-0.328858	-0.611821	0.329702
DYRK1B	0.690433	0.718299	0.764842	1.24203	1.36694	0.711759
DYRK2	0.8428	1.04292	-2.17359	-1.10227	-1.75033	-1.41335
DYRK3	0.553296	0.300911	0.398293	-0.357206	0.384396	0.523339
DYRK4	0.191089	-0.0069551	-0.262139	-0.10855	-0.358541	0.181227
ECE1	-0.517859	-0.130243	1.32719	0.513659	1.60785	1.07803
ECE2	-0.0580719	-0.440779	0.831667	1.15417	0.268305	0.486643
ECT2	-1.49444	-1.59519	-3.52716	-2.33915	-1.71239	-2.9694
EDNRA	0.0581277	0.0622575	-0.0367283	-0.0319687	0.0379361	0.0428803
EDNRB	0.141912	-0.0463501	1.02869	0.721264	0.764284	0.444507
EED	-0.86389	-1.09463	-1.64424	-1.81513	-2.10223	-2.24025
EEF2	-0.0120425	-0.0057774	0.0855188	-0.607275	-1.31558	-0.456406
EEF2K	1.05148	1.0599	1.78317	1.27037	1.68547	1.20185
EGFL7	0.733284	0.449429	-0.699304	-0.459573	-0.353355	-0.29407
EGFR	0.209285	-0.18524	-0.448293	-0.423143	-4.11059	-3.12783
EGLN1	1.11118	1.13436	0.784882	0.753547	0.484491	0.437101
EGLN2	0.273382	0.100722	1.17361	1.5734	1.14495	1.6491
EGLN3	-0.0435258	0.0458011	-0.103017	-0.108161	-0.577387	-0.35026
EHMT1	1.19891	1.1631	1.64773	1.37999	1.45331	1.46325
EHMT2	1.21976	1.73366	0.787773	0.875523	1.35664	0.991961
EIF2AK1	-0.512532	-0.649167	-0.745455	-0.621144	-1.38761	-1.49841
EIF2AK2	0.707007	0.35038	0.737782	0.608057	0.717631	1.20558
EIF2AK3	-0.239802	0.112449	0.4796	0.901439	0.536234	0.946817
EIF2AK4	-0.159783	-0.416587	0.116681	-0.766777	0.205206	-0.0221631
EIF4E	-3.66778	-4.4905	-2.66827	-3.64302	-2.0671	-4.27629
EIF5	-1.22134	-2.50867	-2.74951	-2.67289	-3.35792	-3.39538
EIF6	-2.02767	-2.73774	-2.92393	-2.942	-1.86203	-2.98475
ELANE	0.676668	0.596637	0.360763	0.0702134	0.0876921	-0.119963
ENG	-0.110224	0.126061	0.796037	0.672236	0.853978	0.900862
ENPEP	0.412194	-0.0923333	1.9496	2.16137	2.13402	1.73649
ENPP2	-0.516535	-0.50067	-0.508755	-0.472773	-0.180112	-0.409409
ENTPD1	-0.233262	-0.17597	-0.308879	-0.395487	-0.891411	-0.166035
ENTPD2	0.969219	0.931384	0.569066	0.729399	0.618217	1.16221
EP300	-2.15628	-2.4356	-1.53343	-1.49785	-2.46465	-1.98794
EPCAM	-0.632345	-0.460706	0.187133	0.0599489	-0.293633	-0.363331
EPHA1	1.31969	1.06243	0.560492	0.275679	0.559437	0.692649
EPHA10	0.176513	0.305999	-0.285268	-0.346846	-0.787701	-0.205768
EPHA2	1.15226	1.1169	0.847683	1.19207	0.984232	0.89313
EPHA3	1.17997	1.1719	0.581389	0.887269	0.980465	1.16559
EPHA4	-0.268176	-0.566528	0.924438	0.111517	0.837508	-0.122693
EPHA5	0.175025	0.443397	-0.773227	-0.596735	-0.29347	-0.315968
EPHA6	-0.0174421	-0.389695	-1.06715	-0.571266	-0.939634	0.3147
EPHA7	0.663131	0.248516	0.324003	0.150139	0.962897	0.767859
EPHA8	1.14612	0.9352	0.801407	1.08543	1.08297	0.749545
EPHB1	0.712867	1.07293	0.221272	0.599924	0.532728	0.884285
EPHB2	0.653869	0.886049	-0.421238	0.245186	0.501188	0.633439
EPHB3	-0.926944	-0.916865	-0.912583	-0.572974	-1.16313	-1.23067
EPHB4	0.814385	0.942564	1.50129	1.45776	1.54695	1.27439
EPHB6	-1.15636	-1.12528	-0.515188	-0.59552	-0.883973	-0.479862
ERAP1	-0.975832	-0.555093	-2.4209	-1.66695	-1.59665	-1.75842
ERAP2	0.465346	0.790342	0.838952	0.854362	0.41186	0.713882
ERBB2	0.824351	0.458596	-0.640783	0.128708	-0.413858	-0.759468
ERBB3	-0.311527	0.00793965	0.593064	0.781247	0.472138	0.808982
ERBB4	0.137022	0.0188907	0.0166365	-0.40395	-1.0595	0.300856
ERG	0.0743011	0.192239	-0.285486	0.0128969	-0.228856	-0.0857485
ERN1	0.656423	0.443	-0.599775	-0.661106	-0.14611	-0.726773
ESR1	-0.13049	-0.0434842	-0.372025	-0.274262	0.0606387	-0.220811
ESR2	0.67376	0.77929	0.937287	0.839889	1.48596	1.33881
ESRRA	-0.767245	-0.695482	-0.134294	-0.050588	-0.476394	0.159055
ESRRB	0.106662	-0.131646	0.655497	0.122681	0.651432	0.546614
ESRRG	-0.0446798	0.117444	0.0962058	0.717251	-0.222915	0.400182
EZH1	0.291771	0.700766	0.243989	0.0392655	-0.234928	0.285113
EZH2	-1.51658	-1.17338	-0.371943	-0.563347	-1.2232	-0.567743
F10	-0.60483	-0.693003	-0.0466313	-0.17428	-0.879229	-0.377984
F11	0.165225	0.152875	-0.149053	-0.103165	0.0845272	0.623708
F12	0.522054	0.182254	-0.508668	-0.560361	-0.759745	-0.522051
F2	0.683362	0.507993	0.890555	0.686788	1.02289	1.08564
F2R	-0.198764	-0.0789488	-1.18008	-1.23712	0.0709161	-0.500034
F2RL1	0.619002	0.454991	0.776857	1.40175	1.44564	0.799065
F2RL3	0.155929	0.17353	0.783935	0.87751	0.695965	0.83061
F5	1.04723	0.824024	0.658986	1.04181	0.963358	0.848811
F7	-0.751223	-0.336727	1.34359	1.19523	1.74402	1.01262
F8	-0.947569	-0.558904	-0.0630921	-0.232562	0.264411	-0.520964
F9	-0.0058657	-0.161803	-0.578622	-0.614918	-0.326049	-0.498692
FAAH	-0.349537	-0.506498	0.1137	-0.965313	-0.168574	-0.105837
FABP3	-1.10567	-1.09117	-0.650121	-0.607946	-0.932671	-1.29531
FABP4	0.503255	0.411969	2.01276	1.27261	1.57033	1.66157
FABP5	-1.76811	-1.8688	-3.44051	-3.79528	-3.55154	-3.20849
FAP	-0.206106	-0.451319	-0.196251	-0.110845	-0.185296	-0.818233
FARSA	-1.32372	-1.84762	-1.77908	-1.58744	-1.69724	-1.78249
FASN	-1.20885	-1.19164	-0.510447	-0.723083	-0.064788	-0.957727
FBL	-0.417822	0.20513	-1.70329	-2.39205	-0.405339	-1.65432
FBP1	-0.751072	-0.771102	-0.179678	-0.651264	-1.01005	-0.956507
FCER2	-0.506208	-0.343106	0.418841	0.625326	1.45581	1.5105
FCGR2A	-0.0602319	0.228921	0.490032	-0.190045	0.189861	0.379598
FDFT1	-0.953087	-1.00474	0.684783	1.15663	-0.837632	-0.135295
FDPS	-2.61847	-2.96003	-1.6042	-0.518904	-0.760006	-1.86806
FER	-0.804541	-0.916143	-1.04299	-0.700412	-0.144865	-0.943565
FES	-0.0508682	-0.10356	-0.859373	-0.564805	-0.38035	-0.648082
FFAR1	-0.24871	-0.174618	0.943721	0.50689	1.70178	0.825423
FFAR2	-0.411982	-0.169765	-0.0981449	0.230189	0.397464	0.0184855
FGA	0.389346	0.0431192	0.585738	-0.28588	0.233884	0.758851
FGB	0.268633	0.347897	0.957193	0.67746	0.856576	0.528221
FGF1	-0.807285	-0.955691	0.03228	0.0236502	-0.416684	-0.896389
FGF2	1.04995	1.24725	2.26034	2.55466	2.66187	2.84903
FGF23	-0.002658	0.0994403	0.450001	0.61346	0.148662	0.212323
FGFR1	0.0150445	0.0531222	-0.250816	0.1956	-0.0703818	0.0560044
FGFR2	0.477421	0.220188	0.209433	1.07422	0.709459	0.60578
FGFR3	-0.556682	-0.229687	-0.120672	-0.694172	-0.408986	-0.536448
FGFR4	-1.20023	-1.00762	-1.8327	-2.01987	-0.30229	-1.10097
FGG	0.640782	1.26757	1.56155	1.12613	1.2276	1.453
FGR	1.13998	0.868533	0.495858	1.06498	0.888623	0.913753
FKBP1A	-0.127458	0.0542528	0.116001	0.759458	0.153753	0.23666
FLT1	1.66177	1.42314	0.593243	0.429645	1.50175	1.21243
FLT3	-0.401849	-1.02348	-1.2106	-1.23269	-1.1744	-0.665889
FLT4	0.229669	0.161152	-0.624934	-0.93085	-0.32761	-0.724538
FNTA	-2.20622	-2.46775	-2.71281	-2.75563	-2.46445	-2.21923
FNTB	-1.99718	-2.45609	-3.19083	-2.03521	-2.56972	-2.27491
FOLH1	-0.436528	-0.38386	0.0106274	0.356778	0.406163	0.882144
FOLR1	0.180475	0.0398396	-0.68068	0.149844	-0.296169	0.0329365
FPR1	0.596198	0.57517	0.425812	-0.822408	-0.758393	-0.26673
FPR2	-1.24319	-1.39677	-0.755263	-0.936712	-0.864521	-0.931183
FPR3	-0.83864	-0.539943	0.45569	0.549578	0.66318	0.568685
FRK	-0.570503	-0.75643	1.09644	1.03599	1.38096	1.08617
FSHR	-0.0817016	-0.226013	1.15503	0.266478	0.521227	-0.185434
FURIN	-0.838397	-0.730379	-1.14152	-1.24425	-1.52214	-1.42529
FXYD2	0.423134	0.210599	-0.20123	-0.650085	-0.621116	-0.583578
FYN	-0.153209	0.0737007	-0.361861	-0.410991	0.131148	0.288374
FZD1	0.681909	0.709053	-0.147099	0.0939173	-0.100093	-0.677678
FZD2	0.587384	0.440964	1.18964	0.570078	1.15198	1.25746
FZD5	-0.411902	-0.226272	-0.48176	-0.494179	-0.793863	-0.721115
FZD7	0.318315	0.383495	-0.152084	0.563698	0.0377901	0.480258
FZD8	1.16951	1.3939	0.936207	0.659381	0.830499	0.735563
GAA	0.213052	0.588975	0.20152	0.0725432	0.201626	-0.0339944
GABBR2	1.48928	1.42722	0.651865	1.2047	0.657617	1.22759
GABRA1	-0.484673	-0.218711	-0.762979	-0.792711	-0.815397	-0.862423
GABRA2	0.171969	-0.100401	-0.0172552	1.24517	1.9391	1.36449
GABRA3	0.0701505	-0.0793811	-1.24544	-1.41005	-0.889744	-1.09678
GABRA4	-0.353783	-0.426454	-0.309939	0.560515	-0.310781	0.383635
GABRA5	-0.191832	-0.293318	0.879056	1.20772	1.30491	1.086
GABRA6	0.0904616	0.153541	-0.966576	-0.299377	-0.623256	-0.72755
GABRB2	-0.573726	-0.608006	0.781533	1.07747	0.3524	0.484181
GABRR1	0.849587	0.796085	0.387672	0.152178	-0.435071	-0.0623037
GABRR2	0.306329	0.127102	0.243328	0.453518	0.872339	0.311325
GABRR3	-0.46539	-0.296882	-1.04574	-0.973269	-0.976717	-0.494721
GAK	0.460619	0.250038	-0.690053	-0.455831	-1.38034	-1.30748
GALR1	0.859586	0.654957	1.84155	0.866596	1.01714	1.39975
GALR2	0.343668	0.357162	0.262948	0.350078	0.678603	0.335589
GALR3	0.636637	0.504082	-0.374249	-0.202424	0.00467912	0.0480889
GART	-1.48261	-1.05156	-1.60561	-1.37519	-1.33799	-2.1838
GBA1	-0.106937	-0.0738297	0.0362104	-0.0140961	-0.120495	-0.39283
GC	0.605368	0.707792	0.861871	0.623832	0.887142	1.0953
GCGR	0.771825	0.591641	0.895221	1.33987	1.29555	0.702797
GCK	0.946608	0.585939	0.528892	0.631225	0.828105	0.537337
GDF2	0.216249	0.336718	0.117619	-0.0083941	0.286615	-0.0731121
GGCX	-0.462857	-0.931039	-0.538677	-0.340016	0.106027	0.341936
GGPS1	-3.36067	-2.88285	-1.75506	-1.07513	-2.99107	-2.68626
GHR	0.704325	0.682077	0.0417187	0.131952	0.067527	0.150212
GHRHR	0.0314712	-0.204521	0.639944	1.20527	0.907024	1.02972
GHSR	0.978319	0.680597	-0.925936	-0.405325	-0.704519	-0.162918
CBLIF	0.394372	0.386387	-0.591393	-0.251295	-0.335504	-0.324972
GIPR	0.479214	0.575307	1.81832	1.81165	1.67366	1.68856
GJA1	-0.305899	-0.435202	0.233619	0.190956	0.761961	0.120275
GJA4	-0.756067	-0.266066	-0.549023	-0.483609	-0.472168	-0.857196
GJA5	0.876528	1.0916	1.47764	1.05013	1.20063	0.636992
GJA8	0.448869	0.426422	0.933781	1.1917	1.24781	1.63532
GJB2	-1.6367	-1.52378	1.49371	1.32299	0.320155	0.820894
GJB3	-0.405972	0.0314022	0.26534	0.446494	0.0503023	0.232386
GJB4	0.708939	0.760646	-0.0998373	0.304472	0.479243	0.491077
GJB5	0.77901	0.447438	1.30179	1.10689	1.55286	1.02872
GJB6	-0.924091	-0.657279	-0.729451	-0.697307	-0.642279	-1.10519
GJC2	-0.74403	-0.646864	-1.90764	-1.73647	-1.5627	-2.10836
GJD2	0.808386	0.880669	0.988657	0.484064	-0.760011	-0.422445
GJD3	0.681585	0.519671	0.453257	1.03049	0.54488	-0.434579
GJD4	0.910099	1.06757	0.248331	0.715973	0.729035	0.656328
GLP1R	1.6076	1.58475	0.703956	1.15359	1.16893	0.747883
GLRA3	0.897571	0.989784	-0.994352	-1.34039	-0.427209	-1.17975
GLRB	0.348594	0.254334	1.02039	0.344869	0.00593439	0.0305283
GLS	0.424521	0.193132	1.51339	1.57779	1.24334	1.59204
RACK1	-2.33067	-3.77586	-2.65769	-3.08378	-4.50332	-2.90353
GNG7	0.482217	0.372584	1.40188	1.80636	1.70168	1.58692
GNRH1	-0.466739	-0.379209	0.44377	-0.133751	0.293038	0.122488
GNRHR	0.472556	0.55504	0.0325019	0.179728	0.489541	0.0602512
GP1BA	0.507219	0.634448	0.283198	-0.564195	0.708873	-0.651653
GP2	0.336813	0.664721	0.793126	0.285873	1.37114	0.159644
GPD2	0.216173	0.23057	1.41843	1.32956	1.71655	1.4912
GPER1	1.20037	1.18846	-0.146625	0.185102	-0.538065	-0.328893
GPN2	-3.3454	-2.92906	-4.73945	-4.03572	-3.89451	-3.63043
GPN3	-2.78065	-2.87939	-1.40441	-1.92643	-2.02601	-2.09419
GPR139	0.878258	0.690559	1.04347	1.32934	0.59928	1.51566
GPR55	0.34431	0.671635	1.29269	1.61241	1.65869	1.75542
GPR87	-0.613057	-0.765139	-1.87592	-1.45864	-1.10898	-1.35128
GRIA1	0.705203	0.86668	1.62737	2.11466	1.54911	1.43418
GRIA2	-0.431937	-0.047922	0.320327	-0.109548	-0.0874256	0.258144
GRIA3	-0.824462	-0.397476	0.655977	0.29887	0.376548	0.757895
GRIA4	0.0620595	0.166877	-0.310885	-0.225401	-0.518953	0.0288274
GRIK1	-0.781686	-0.0469973	-0.58495	-0.247108	0.132896	0.0623386
GRIK2	0.540296	0.483167	1.35026	1.2882	0.669448	0.857987
GRIK3	-0.972613	-0.883496	-1.30022	-1.05136	-0.835565	-0.585255
GRIK4	0.393362	0.576701	-0.830326	-1.29292	-1.43734	-1.24623
GRIN1	0.504738	0.434981	0.677091	0.219646	0.509108	0.208434
GRIN2A	-0.393506	-0.61167	-0.277803	-0.667311	-0.677084	-0.181692
GRIN2B	0.279432	0.744051	0.715937	0.527283	1.11494	0.621038
GRIN2C	-0.424693	-0.478396	0.354715	1.19702	-0.247332	0.168136
GRIN2D	0.995639	1.1305	1.70726	1.49499	1.53628	1.59265
GRIN3A	0.0759421	0.18145	-0.108537	0.323084	0.245577	-0.118298
GRIN3B	0.893692	0.711544	1.09469	0.604422	0.518065	0.922757
GRK4	0.144079	-0.0795691	-0.901059	-0.579198	-0.895024	-1.17929
GRK5	0.0218103	0.302174	0.0784112	0.111923	0.384127	0.0880774
GRK6	0.308687	0.205862	-0.480273	-0.0016823	-0.186564	-0.261267
GRK7	-0.407306	-0.0790775	-1.17325	-0.853272	-1.60028	-1.16315
GRM1	0.441179	0.0916278	0.999152	0.869819	0.534686	0.655866
GRM2	1.4119	1.38529	0.719763	1.34448	1.71788	1.25139
GRM3	-0.836265	-0.892685	0.131072	0.133678	-0.555654	0.672222
GRM4	0.468652	0.344361	0.337953	0.709464	0.679778	0.231975
GRM5	0.976691	1.18962	0.175652	0.541024	0.643977	0.449738
GRM6	-0.242505	0.0913474	0.0573269	-0.265741	0.361448	-0.186995
GRM7	0.0305607	0.2931	-0.28355	-0.0548216	-0.501148	0.082062
GRM8	0.179073	0.330252	0.393878	-0.108014	1.08819	0.615669
GRPR	-1.08804	-1.06976	-0.668125	-0.623522	-0.138892	-0.272527
GSK3A	0.014717	0.109426	1.69684	1.4993	1.24123	1.02752
GSK3B	1.41391	1.30972	1.6839	1.27132	1.88927	2.43702
GSR	0.894087	0.766543	0.930441	0.84835	0.572397	0.182169
GSTP1	-0.370726	-0.335135	-0.098549	-0.3816	0.145162	0.119909
GUCY1A2	0.734712	0.956064	0.592411	0.65706	0.689954	0.791695
GZMB	0.659354	0.550354	1.02568	1.69093	1.84038	1.20674
HCFC1	-2.22375	-1.97853	-2.77683	-2.85375	-3.09769	-3.29127
HCK	-0.95466	-0.943114	-0.488179	-0.779003	-0.528016	-0.993421
HCN4	0.758283	0.57951	0.638214	-0.10116	0.540563	-0.018688
HCRTR1	-0.0044749	0.274172	-0.239133	-0.497898	-0.701473	0.23483
HCRTR2	0.178846	0.170155	-0.508371	-0.663233	0.238219	-0.472913
HDAC1	0.0705671	0.0279887	0.0338338	0.398824	0.0392385	0.543206
HDAC10	-0.690781	-0.807331	-2.04298	-1.54047	-0.783045	-1.34122
HDAC11	0.221028	-0.100373	-0.100894	-0.590428	0.171599	-0.642861
HDAC2	0.812425	0.748027	0.360568	-0.768558	-0.449381	0.188003
HDAC3	-2.47428	-1.83324	0.550979	0.00996151	0.698223	1.1
HDAC4	1.01938	1.06647	1.26284	1.42755	1.27644	1.5397
HDAC5	0.505665	0.732505	0.253807	0.816247	1.50363	1.40265
HDAC6	0.815656	0.457446	-0.851836	-1.42038	-1.04394	-0.502338
HDAC7	1.52717	1.69278	1.3623	2.316	1.70901	1.61805
HDAC8	-0.424629	-0.539644	-0.681446	-0.659553	-0.844633	-1.64345
HDAC9	0.613268	0.839314	0.686324	0.0262063	0.167017	-0.481633
HDC	0.40301	0.218602	-0.674249	0.114991	-0.472554	-0.124094
HEATR1	-3.34047	-2.05949	-2.92227	-2.94245	-3.12614	-2.70879
HEBP1	0.750016	0.581543	0.737271	0.568746	0.0579728	-0.0275432
HGF	1.18878	0.453621	1.0093	0.998367	0.277137	0.758965
HIF1A	-0.164942	-0.446199	1.34818	1.00409	0.831535	0.44798
HIPK1	1.00081	0.715082	-0.0991291	0.648882	1.17369	-0.0043211
HIPK2	0.485938	0.560911	1.43543	0.957619	0.997052	0.363583
HIPK3	-0.330028	-0.199708	-1.00406	-0.895245	-0.83183	-0.419892
HMGCR	1.8616	1.92753	1.6764	1.52673	1.50409	2.30242
HMGCS1	-5.34209	-4.92396	-2.83009	-3.36477	-4.43083	-5.00711
HMOX1	0.304217	0.310642	0.684778	0.298667	0.962718	0.989336
HNF4A	-3.3116	-3.21145	-2.95689	-2.21247	-4.48958	-3.4095
HNMT	-0.323496	-0.221252	-0.474786	-0.860101	-0.62239	-0.555152
HNRNPK	-1.24905	-2.12681	-2.67486	-1.9281	-1.29795	-2.79348
HPD	0.0799584	0.0868637	-1.15172	-1.12109	-0.97164	-0.74441
HPGD	0.352493	0.321975	-0.463046	-0.916799	0.125784	-0.129922
HPGDS	-0.89541	-0.857382	-0.156717	-0.516934	-0.499874	-0.268174
HPSE	-0.182856	-0.343536	-0.295321	-0.432037	-0.574546	-0.646374
HRAS	0.225158	0.402957	0.881701	0.999708	0.297506	0.104809
HRH1	0.14409	0.0864912	-0.76911	-0.254751	-0.88353	-0.508245
HRH2	0.372011	0.615092	0.80927	1.31614	1.06053	0.373758
HRH3	0.291738	0.359199	0.433776	0.797644	0.835015	0.699932
HRH4	-0.926008	-1.0198	-2.27094	-2.06579	-2.13931	-1.40436
HSD11B1	-0.584317	-0.158631	0.516196	-0.166067	-0.0739197	-0.0606089
HSD3B2	-0.318592	-0.417583	-0.239078	-0.420632	-0.401356	-0.592919
HSP90AA1	-0.0621356	-0.106154	-0.0470996	0.0416848	-1.08694	-0.249579
HSP90AB1	-1.3556	-1.98288	-2.60237	-1.86511	-2.55822	-2.81485
HSP90B1	-1.63058	-2.46905	-2.21904	-1.48567	-1.26576	-2.25941
HSPA5	0.702192	0.920043	-1.97949	-1.57339	-0.873129	-1.32471
HSPA8	-1.87022	-1.69579	-0.892804	0.532236	-1.01281	-0.211583
HSPB1	1.5688	1.79311	2.84723	2.96785	2.69823	2.44861
HTR1A	0.795382	0.831188	1.1316	0.311615	0.815046	1.17065
HTR1B	0.853489	1.0339	1.57726	1.76204	1.87895	1.98869
HTR1D	-0.055836	0.10475	0.074209	-0.0087627	-0.0552217	-0.244245
HTR1E	-0.668882	-0.490681	0.683894	0.417376	0.556359	0.816831
HTR1F	0.312376	0.0938656	0.423844	-0.0794401	0.0889025	0.279148
HTR2A	-0.0498388	0.18135	0.822387	1.14712	1.05637	1.51272
HTR2B	-0.5126	-0.386549	0.237276	-0.871338	0.114785	-0.790293
HTR2C	0.630282	0.894744	-0.275377	-0.258438	0.478044	0.672876
HTR3A	0.175209	0.0525359	-1.55792	-1.56237	-1.29132	-1.41242
HTR3B	-0.47946	-0.269983	0.808538	1.26963	1.27367	1.66409
HTR3C	-0.130981	-0.307941	0.289376	0.439132	0.0801865	-0.119495
HTR3D	0.0811381	0.128704	0.805564	0.264439	-0.746472	-0.381194
HTR3E	-0.322563	-0.43199	-0.122346	-0.274703	-0.176847	0.0499442
HTR4	0.230981	0.506776	0.11939	-0.361024	-0.437684	-0.0355067
HTR5A	0.538699	0.321279	0.348086	0.147493	-0.502851	0.106146
HTR6	-0.265642	-0.337793	1.1605	1.3555	1.14076	0.965397
HTR7	0.678124	0.626897	0.743016	0.377017	0.521362	0.710782
HTT	-0.0605312	0.209411	-0.43561	-0.551486	-1.06784	-0.988309
ICAM1	1.13465	1.33576	0.138351	1.07108	0.331224	0.603391
ICAM3	-0.540529	-0.64674	-0.73834	-0.270223	-0.502216	-0.868247
ICE1	-0.174699	-0.109672	0.0613349	-0.883853	1.44446	0.826199
IDE	-1.15852	-0.86269	0.0984651	-0.244238	-0.133907	-0.308985
IDH1	0.221498	0.320629	-0.0393973	0.0579901	0.199553	0.066876
IDH2	-0.547699	-0.956218	-1.4713	-1.5675	-0.703567	-1.24724
IDI1	-0.433135	-0.359847	0.167643	-0.036061	0.587062	0.584948
IDO1	0.745831	0.978809	1.007	1.23142	1.39057	1.41177
IFNAR2	0.785988	0.994163	0.582575	0.41464	0.259043	0.150695
IFNG	0.765891	0.778865	0.667742	0.612058	0.614602	0.729617
IGBP1	-0.50374	-0.387124	-0.246927	-0.426362	-1.45874	-1.0529
IGF1	0.725905	0.922998	0.946527	0.55331	0.751348	0.638414
IGF1R	-0.246374	-0.289484	-1.26682	-0.968387	0.00888124	-0.311677
IGF2	-0.572329	-0.764673	-1.35069	-0.978647	-1.60526	-1.53253
IKBKB	1.20698	1.20748	0.771363	1.31828	1.5918	1.37682
IKBKE	0.695075	1.11309	1.69495	1.14896	1.46706	1.53605
IL10	0.48635	0.524074	0.437181	0.517926	0.244978	0.316468
IL12A	0.641368	0.218897	0.545334	0.944604	0.248068	1.24412
IL12B	-0.115236	-0.291046	0.267822	0.0308819	0.375404	0.343821
IL13	0.366742	0.0970612	2.1761	2.25577	1.46833	1.64196
IL15	-0.478119	-0.20939	0.158541	0.52697	0.194227	-0.21442
IL17A	0.876774	0.748504	0.191809	0.108885	0.170447	-0.238475
IL17RA	0.0935097	-0.322814	-0.449346	-0.179214	-0.551388	-0.239333
IL1A	-0.851213	-0.712377	-0.391908	-0.113362	0.148649	0.241597
IL1B	-0.0817152	0.269521	-2.88831	-2.48937	-2.55871	-2.3622
IL1R1	-0.364784	-0.241785	-0.607467	-0.374689	-0.583981	-0.34928
IL1R2	0.414664	0.418656	-0.461729	-0.510682	-1.01872	-0.516239
IL22	-0.401444	-0.408203	-0.923933	-1.31824	-0.971295	-0.75317
IL23A	0.452841	0.403761	-0.43382	-0.637069	-0.0975903	0.219543
IL2RA	0.464131	0.625521	1.52718	1.53912	1.36629	0.987115
IL2RB	0.432668	0.481924	-0.671609	-0.505261	-0.17186	-0.352436
IL2RG	0.795773	0.958726	0.406185	0.32248	0.0693607	0.303293
IL4	0.87377	0.731493	1.15901	1.59611	0.961613	1.08732
IL4R	0.82682	0.560066	0.640742	0.530283	0.282044	0.0605798
IL5	1.06807	1.02541	1.32813	1.64373	1.32007	1.41064
IL5RA	0.0208385	0.263497	2.2082	1.9433	1.89064	2.06271
IL6	-0.184021	-0.0621279	-0.832667	-0.120656	-0.247682	-0.385629
IL6R	-0.823149	-0.448387	-0.618346	-0.25141	0.487477	-0.0874185
IL6ST	0.171238	-0.179997	-1.96529	-2.37734	-2.15388	-1.77237
IL9	0.0735413	0.25675	0.260254	0.106253	-0.948423	-0.528645
ILK	-1.04006	-1.31102	-0.592799	-0.286724	-0.131123	-0.0262824
IMPA1	-0.27073	-0.170747	-1.15871	-1.08283	-0.363651	-0.128336
IMPDH1	0.0729094	-0.14437	0.700991	0.731794	0.59576	0.0887279
IMPDH2	-3.36067	-3.65307	-1.51198	-0.956598	-2.58694	-1.91976
INHBA	1.0323	1.17726	0.88173	0.544185	0.974141	0.671873
INPP5A	1.16294	1.24463	0.88281	0.736152	0.067876	0.119482
INPP5D	-0.103543	-0.207769	0.00765693	-0.441352	-0.362858	-0.152935
INPPL1	1.34834	1.25306	1.36306	0.709695	0.778813	0.619347
INSR	0.0608764	-0.0332341	-1.01348	-1.02902	-1.8868	-1.73984
INSRR	0.0152654	-0.226753	0.391245	0.274471	-0.109856	0.48348
IRAK1	0.0955365	0.324293	1.00098	0.472903	0.303329	0.0729721
IRAK3	1.0726	1.04525	0.936742	0.499301	0.436874	0.580357
IRAK4	-1.52118	-1.33585	-0.563907	-0.307725	-0.323968	-0.122617
ISG15	0.840557	1.20647	-0.488436	-1.14319	-0.48931	-0.654722
ITGA2	1.03652	0.61777	1.72801	1.74383	1.6266	1.54755
ITGA2B	-0.942445	-1.13497	-0.0934763	-0.351658	-0.136658	-0.756617
ITGA4	-0.398698	-0.305648	-0.0332575	0.216302	0.261827	0.201373
ITGA5	1.16796	1.0178	0.484657	0.665749	0.974402	0.830732
ITGAL	0.173482	0.336509	1.41226	1.79635	1.86914	1.89447
ITGAM	-0.153273	-0.242987	-0.891226	-0.300242	-0.999303	-0.436803
ITGAV	-1.49969	-1.50159	-1.15567	-0.520832	-2.32148	-2.38222
ITGB1	-0.02662	-0.0639048	2.12526	2.39057	2.31516	1.91714
ITGB2	0.62534	0.560905	1.27989	0.840525	0.952441	0.901838
ITGB3	0.365317	0.12579	-0.161502	-0.269907	0.0522775	-0.0754983
ITGB5	-1.26936	-1.15426	-0.467521	-0.377849	-1.1677	-0.798236
ITGB6	1.26301	1.73584	-0.744747	-0.818256	-0.531145	-0.825735
ITGB7	0.656288	0.527852	1.76933	1.76627	1.2027	0.895397
ITK	0.88854	0.951427	0.250979	-0.25138	0.542079	-0.291654
ITPKA	0.729122	0.626837	1.15397	1.85769	1.65355	1.66681
ITPKB	0.542856	0.573424	-0.0294166	0.301654	0.250735	0.0247659
ITPR1	0.723155	0.590831	1.60805	1.96248	1.45092	1.54682
ITPR2	0.0499618	-0.116803	-1.53873	-1.63203	-0.586746	-0.151495
ITPR3	-0.12162	-0.123948	-0.787574	-0.642023	-1.28238	-1.58103
JAK1	-0.630606	-0.850301	-1.74196	-0.77059	-1.38326	-0.982339
JAK2	-1.11826	-0.60805	-1.40647	-0.72419	-0.879475	-1.10087
JAK3	-0.721585	-0.705283	0.353759	0.100759	-0.127134	0.167129
JUN	0.351668	0.479731	1.22359	1.88813	1.63438	2.0225
KARS1	-0.216753	0.814124	-0.615721	-1.07425	-0.731497	-0.0721739
KAT2B	0.824896	0.416547	0.355188	0.519209	0.430839	0.111799
KAT5	-1.85127	-1.5901	-1.79371	-1.36707	-1.56783	-1.0984
KAT8	-1.91526	-1.84741	-1.86453	-1.78112	-1.2695	-2.01375
KCNA1	-0.665727	-0.98729	0.233923	0.636046	1.14147	0.6836
KCNA10	0.349836	0.253692	0.00697763	0.202482	0.259798	0.0493389
KCNA2	-0.532427	-0.426304	0.311842	0.481103	-0.0025275	-0.284457
KCNA3	0.670388	0.875	0.995948	0.934904	1.17621	0.905069
KCNA4	1.09091	1.55646	0.286569	0.731392	0.775933	0.48569
KCNA5	0.261655	0.0653639	0.384471	0.322232	-0.349801	0.330923
KCNA6	0.294039	0.366943	0.270442	0.297318	0.762543	0.498022
KCNA7	-0.725848	-0.739476	0.830718	0.666526	0.484063	0.823287
KCNB1	-0.368413	-0.446851	0.185626	-0.469192	-0.676331	-0.495761
KCNB2	-0.0665109	0.13235	-0.35691	-0.19124	0.483491	-0.283236
KCNC1	0.794586	1.04192	0.505312	0.934822	0.476525	0.563062
KCNC2	0.309281	0.40943	1.80363	1.94671	2.25606	2.07495
KCNC3	0.497526	0.299496	0.456663	0.367546	0.532915	0.826099
KCNC4	0.266027	0.205711	0.51707	0.497798	0.678431	0.530409
KCND1	0.044048	0.362191	-0.888471	0.186379	-1.15319	-1.05557
KCND2	0.375965	0.463645	-0.156081	-0.61057	-0.897026	-0.166199
KCND3	0.444868	0.31475	-0.542069	-0.229947	-0.152462	0.21544
KCNF1	-0.780941	-0.641061	0.912022	0.375514	0.315876	0.604094
KCNG1	0.260827	0.260219	1.20723	1.24724	0.8612	0.936075
KCNG2	0.197407	-0.122437	0.191647	0.24259	0.182734	0.0945613
KCNG3	-0.88838	-0.934634	0.00244188	-0.493293	-0.170085	-0.491854
KCNH1	-0.166375	0.234992	0.90025	0.893667	0.615754	0.365108
KCNH2	0.0752085	0.190851	-0.641001	-0.46589	-0.395375	-0.0952052
KCNH3	0.35664	0.198767	-0.357322	-0.0999614	-0.253799	0.14307
KCNH4	0.653877	0.609305	0.292965	0.696174	0.71692	0.475832
KCNH5	0.546185	0.616643	1.47629	0.0298022	0.544905	0.365429
KCNH6	-0.613914	-0.479385	-1.56762	-1.26317	-1.27827	-1.04163
KCNH7	1.36731	1.15786	1.45083	1.0353	1.53184	0.585913
KCNH8	0.602272	1.07819	0.965836	1.33538	0.670638	1.46145
KCNJ10	1.34085	1.42468	1.0143	0.845559	2.09894	1.59114
KCNJ11	0.59985	0.263716	-0.455414	-0.138836	-0.458206	-0.271128
KCNJ12	-0.561838	-0.652438	-0.769052	-0.350052	0.690178	-1.02156
KCNJ14	0.356763	0.254544	0.601896	0.699158	0.917102	0.593824
KCNJ2	1.16092	1.44114	1.21462	1.37486	1.92853	2.37273
KCNJ5	0.305835	0.128106	0.744839	0.875248	0.635856	0.296974
KCNK13	0.00597184	0.159284	-0.706115	-1.16499	-1.27477	-1.09468
KCNK18	1.13123	1.2197	0.140453	-0.100645	0.0208689	0.139059
KCNK3	-0.356111	-0.605189	-0.114189	-0.32487	-0.411035	-0.606448
KCNK9	0.236946	-0.0320619	1.15673	1.29773	1.21449	0.849083
KCNN1	1.06351	0.697391	-0.217373	-0.372986	-0.0485142	0.1887
KCNN2	0.680311	0.900908	1.06365	1.49283	1.25309	0.743433
KCNN4	0.258141	0.257902	-0.208837	-0.248691	-0.991146	-0.566488
KCNQ1	-0.0481939	-0.0223948	0.742827	0.579074	0.480904	0.533646
KCNQ2	0.393719	0.441545	0.093247	0.50921	0.0602292	0.441718
KCNQ3	-0.157682	-0.239188	0.495235	0.00026131	1.06157	1.23024
KCNQ4	0.129478	0.428621	-0.797247	-0.378579	-0.96439	-1.01034
KCNQ5	1.3304	1.21609	1.07908	1.25219	1.01101	1.07278
KCNS1	0.411719	0.0826563	0.511283	0.347258	0.683692	0.488684
KCNS2	0.298592	0.194286	0.502554	0.511046	1.1235	0.893718
KCNS3	0.470083	0.597783	0.0167809	-0.682777	-0.338334	-0.165263
KCNV1	0.499209	0.606277	-0.298644	0.455554	0.170586	0.0484367
KCNV2	-0.582681	-0.590876	-1.48988	-2.02135	-1.69006	-1.45556
KDM1A	-1.57864	-1.71181	-0.936627	-1.3755	-1.81682	-1.41907
KDM2A	-2.28965	-2.4539	-3.22926	-2.5142	-2.63436	-2.48881
KDM3A	0.115772	0.0993987	1.03965	0.849492	0.487135	0.551497
KDM4A	-1.3793	-0.820728	-1.50975	-1.82901	-2.20308	-1.62909
KDM4C	-0.201817	-0.229293	-0.481751	-0.448381	-0.44897	-0.703371
KDM4E	-1.10036	-0.945909	-0.953597	-0.779143	-0.972079	-1.20632
KDM5A	-0.541139	-0.376586	0.247727	0.436705	1.35375	1.49245
KDM5B	0.0172233	-0.0284471	0.362822	0.349191	1.37216	0.695065
KDM5C	-0.0468901	0.213431	0.982688	1.38354	0.56668	0.168574
KDM6A	-0.104433	-0.382402	0.33322	-0.309185	1.13389	0.715579
KDM6B	0.990401	0.56766	1.2796	1.38913	1.11112	0.555878
KDM7A	1.29321	1.17173	1.79271	1.50579	1.98847	2.01563
KDR	0.302322	0.190706	-0.272779	0.363133	1.11953	1.02018
KEAP1	1.8929	2.18323	1.65454	1.17427	0.835146	0.354801
KIF11	-1.03793	-0.913577	-3.16221	-3.68804	-3.62452	-3.41374
KIR2DL1	0.539309	0.219008	0.949995	0.817403	0.160734	0.946526
KIR2DL3	0.513393	0.538652	-0.536593	-1.10731	-0.331359	-0.41897
KIT	0.0698898	-0.114699	0.247257	0.00761493	0.701892	0.645591
KLK1	-1.03272	-0.941365	-0.860521	-0.47198	-0.314141	-0.508828
KLK14	1.4849	1.33868	0.661601	0.743695	0.825872	0.431785
KLK2	-0.0292876	-0.132347	1.48114	1.29504	1.33378	0.909005
KLK3	0.383478	0.275319	0.2704	-0.201747	0.244064	0.712252
KLK4	0.216784	0.548708	-0.166934	-0.344637	0.0490825	-0.312378
KLK5	-0.220389	-0.0790524	-0.60136	-0.451009	-1.06819	-0.462922
KLK6	0.698045	0.547841	0.0128895	0.102788	-0.569864	0.127019
KLK7	-0.118974	-0.197309	0.142418	0.623533	0.0821901	-0.613094
KLKB1	0.414061	0.760667	1.59175	0.919381	1.30678	0.547686
KMO	0.251777	0.27885	-0.626163	-0.655398	-0.250007	-1.47558
KPNB1	1.59886	2.76004	0.99087	1.67412	-0.863166	1.06592
KRAS	0.162794	0.137678	-0.195775	-0.533634	-0.605548	-1.08684
LAP3	0.21871	0.235258	-1.1428	-1.19213	-0.995759	-1.30647
LATS2	0.903604	0.858809	1.18482	1.18988	1.12404	1.74945
LCK	-0.105544	0.141567	1.25955	1.97097	1.59453	1.40013
LGMN	-0.816411	-0.688409	-0.346567	-0.162755	-0.5585	-0.353125
LIMK1	0.158897	0.0700021	0.0254844	-0.126841	0.504709	-0.100657
LIMK2	0.443735	0.426275	0.359596	0.636063	0.584843	0.859432
LINGO1	1.18764	1.16488	1.29253	0.489878	1.22072	1.55584
LIPE	1.39532	1.46697	0.399994	0.751696	0.770616	0.459976
LIPF	-1.07044	-0.867799	0.618822	1.17263	0.248253	-0.0653823
LIPG	-0.309454	-0.136246	0.256324	0.00548229	0.217677	0.11624
LNPEP	0.657589	0.461564	1.19557	0.897361	0.727605	1.14553
LOXL2	0.659078	0.584605	0.837017	1.05847	0.753064	0.13124
LPAR1	0.463261	0.548143	1.1626	1.87696	1.65238	1.41451
LPAR2	0.926854	0.561614	-1.00929	-0.406784	-0.723188	-0.80191
LPAR3	-0.460666	-0.576058	0.169061	-0.287365	-0.167282	0.131102
LPAR4	0.221817	-0.305855	1.73903	1.82321	2.37311	1.80818
LPAR5	1.40369	1.13025	0.863338	0.267868	0.697134	0.785781
LRRK2	-0.256654	-0.318814	-0.262605	-0.299368	-0.423065	-0.752212
LSS	0.126237	0.13001	1.0107	1.4999	0.106855	0.586195
LTA	-0.260974	-0.103107	0.500144	-0.35887	-0.282777	-0.643939
LTA4H	0.591089	0.396732	1.27937	1.23296	0.955591	0.342835
LTB	1.70325	1.75581	1.41157	0.90478	1.43542	1.5828
LTB4R	0.521097	0.181592	0.199869	-0.250279	0.473962	0.110647
LTB4R2	1.13115	1.08927	0.878538	0.609	0.890666	0.84457
LTC4S	1.53126	1.35866	2.21086	2.19046	1.42653	1.99263
LTK	-0.399093	-0.260116	1.09442	1.22582	0.259278	0.654491
LVRN	0.495547	0.30351	0.645073	0.563994	0.245856	0.44754
LY96	0.155162	0.413906	1.444	0.775476	0.485473	-0.0234032
LYN	0.902999	0.399721	0.709305	0.74429	1.05159	1.09996
MADCAM1	-0.154492	-0.411217	-0.0049063	0.399765	0.682821	0.0458309
MAG	0.843715	0.504874	0.618828	0.724829	0.263354	-0.218544
MAOA	-0.446137	-0.594547	0.157947	0.0951358	0.350068	0.208772
MAOB	-0.14932	-0.006766	-0.620291	-0.600605	-0.385524	-0.249899
MAP2K1	0.411058	0.0969343	0.156296	0.0999762	0.213491	-0.74513
MAP2K2	0.252166	0.137061	-0.128482	-0.320384	-0.694587	0.019494
MAP2K3	-0.209029	-0.29141	0.396232	1.12975	1.34149	0.485134
MAP2K4	-0.0990403	0.655587	2.19396	1.90327	0.522676	1.65514
MAP2K5	-0.578711	-0.0640194	0.676545	0.444346	-0.0294321	0.0140772
MAP2K6	0.225981	0.146972	1.72266	2.10257	1.63538	2.15103
MAP2K7	0.491281	0.411219	-0.0118655	-0.303185	0.00401817	0.15482
MAP3K1	-0.277008	-0.297349	0.463014	0.154977	-0.252011	-0.0470734
MAP3K10	0.931392	0.804396	1.96114	1.62984	1.32973	0.984133
MAP3K11	0.769297	0.811754	1.06787	1.06938	1.02302	1.41
MAP3K12	0.772048	0.873662	1.63188	1.3314	0.980425	1.1622
MAP3K13	0.854738	0.958237	0.240617	-0.0435955	0.494715	0.161811
MAP3K14	-0.268473	-0.336806	-0.940191	-0.983338	-0.305899	-0.325891
MAP3K19	-0.0677253	0.160555	0.441122	-0.17987	0.124384	0.610297
MAP3K2	-0.0005047	-0.464639	1.51693	1.52721	0.669583	1.46462
MAP3K3	0.547086	0.650173	-0.0360836	-0.276614	0.264988	0.0943292
MAP3K5	1.02741	0.903432	-0.052793	0.0848556	-0.407762	0.565002
MAP3K6	0.331957	0.142302	0.26621	-0.037499	0.475254	0.370712
MAP3K7	0.715993	0.840726	0.70707	0.113385	0.280296	-0.243196
MAP3K8	0.331035	0.177125	0.42242	0.0788091	-0.197017	-0.627354
MAP3K9	1.0451	1.16876	2.46212	2.97679	2.08851	2.24922
MAP4K2	-0.0192874	-0.045346	0.237241	0.643287	0.12451	-0.28932
MAP4K3	1.17688	1.28371	0.860585	0.655371	0.180823	-0.202827
MAP4K4	1.28623	1.59472	0.523196	0.502179	1.21915	0.316387
MAP4K5	-0.282627	-0.523976	-0.347121	-0.172944	-0.100426	-0.765708
MAPK1	0.0476577	0.0507539	-0.0472336	-0.0421275	0.0269087	0.0324036
MAPK10	0.736859	0.502661	0.715777	0.587401	0.4771	1.26546
MAPK11	1.033	0.60774	0.116821	-0.533212	0.591331	0.313007
MAPK12	-0.279954	-0.403238	-0.627397	-1.14173	-0.977913	-1.16943
MAPK13	0.166776	-0.205915	0.481602	-0.215669	-0.366831	0.0998908
MAPK14	-1.31626	-0.779393	-0.469133	-0.766938	0.187578	-0.0628842
MAPK15	-0.125423	0.0401808	-0.749342	-0.0420541	-0.048967	-0.251039
MAPK3	0.364306	0.51067	1.4096	1.57005	1.81507	1.9325
MAPK7	0.264772	-0.15023	1.02706	0.878716	0.268971	0.454136
MAPK8	0.338358	0.741743	1.23036	1.24033	1.5154	1.63032
MAPK9	0.239519	-0.0616024	-0.721787	-0.283861	-0.608883	-0.287355
MAPKAP1	-2.19056	-1.62954	-1.39252	-1.82215	-0.983617	-0.595217
MAPKAPK2	-0.180142	-0.133836	-0.950894	-1.60688	-1.12175	-0.718416
MAPKAPK3	0.6897	0.346171	-0.533199	-1.26825	-0.443802	-0.684366
MAPKAPK5	0.442737	0.323964	-0.476399	-0.910982	-1.01912	-0.76094
MARK1	-0.155256	-0.0032323	-0.613043	-0.234729	-0.569066	-0.827747
MARK3	-0.963832	-0.909639	0.128214	0.139142	0.858551	0.60218
MAS1	-1.69932	-1.32317	1.1644	1.09598	1.00596	0.866306
MAST3	0.299532	0.416489	-0.0358994	0.446977	0.504262	0.360185
MAT2A	-0.117802	0.304087	-1.23806	-1.93988	-1.18021	-0.654508
MBTPS1	-1.70464	-2.03284	-0.919207	-1.72815	-1.97211	-1.37711
MC1R	-0.167127	-0.512343	0.473028	0.312045	0.521272	0.670591
MC2R	-0.231082	0.0849996	-0.390535	-0.404779	0.105894	-0.480216
MC3R	0.379742	0.315643	1.54433	1.71364	1.56392	1.8496
MC4R	-1.033	-0.73385	0.684792	0.426168	0.10597	0.192531
MC5R	0.667131	0.416702	-0.172423	0.269524	0.257369	-0.114709
MCHR1	-0.202801	-0.792901	0.417747	-0.0479624	0.694321	0.530118
MCHR2	-0.788786	-1.05198	0.592638	0.631603	0.750022	0.105191
MCL1	0.444853	0.354229	-0.226273	0.297974	0.65014	0.493749
MDM2	0.200565	0.149641	0.0935993	0.611727	0.972455	0.636881
MELK	0.786849	0.937287	1.37476	1.13301	1.20838	1.25815
MERTK	0.665195	0.544818	0.653539	0.956554	0.914338	1.12594
MET	0.109465	-0.0475448	-1.57704	-1.19025	-1.04328	-1.30247
METAP1	-2.81249	-2.52878	-1.08563	-1.39358	-0.406918	-0.425014
METAP1D	-0.419175	-0.361331	-2.36104	-1.89035	-1.32515	-1.92033
METAP2	-2.92873	-2.8555	-0.575103	-0.701712	-1.02567	-0.375008
MGA	0.577782	1.0135	2.95e-05	1.32902	-0.101042	0.31898
MGAM	-0.680079	-0.740543	0.501783	-0.134714	-0.121903	0.158466
MGLL	0.375921	0.09914	0.475981	-0.497034	0.0890477	-0.100234
MINK1	0.66476	0.551188	0.110084	0.454505	0.287619	0.589128
MIP	0.390642	0.209831	-0.837991	-0.314961	-0.0101345	-0.436751
MKNK1	-0.4951	-0.340847	1.09655	1.08653	1.36007	1.41105
MKNK2	1.14757	1.17732	0.691236	0.639206	1.01614	0.475395
MLKL	0.381102	0.624978	0.526851	0.740789	-0.366681	-0.242189
MLNR	0.255805	0.0331583	0.181352	-0.631788	-0.239928	-0.340405
MLST8	-1.09631	-1.50067	-1.9291	-1.63578	-0.258217	-0.682685
MLYCD	0.74616	0.798883	-0.0626542	-0.31891	-1.13384	0.418936
MME	0.134983	0.407755	0.184203	-0.0075637	0.283584	0.539682
MMP1	-0.055404	-0.287716	-1.79335	-2.49846	-1.26566	-1.21658
MMP10	1.29109	1.12977	-0.211972	-0.329865	-0.012278	0.126519
MMP11	-0.372779	-0.210008	0.0101802	0.325517	0.782177	0.339951
MMP12	0.534447	0.925158	-0.671942	-0.902533	-0.68769	-1.09336
MMP13	-0.657709	-0.256375	0.166654	-0.216047	0.299279	0.0891035
MMP14	1.12193	0.889468	-0.407072	-0.13328	-0.395314	-0.249637
MMP15	0.103602	0.189701	0.477357	0.341042	0.646299	0.531525
MMP16	-0.0658189	-0.069856	-1.62375	-1.52359	-1.72353	-1.6389
MMP17	-0.129201	-0.0290148	0.291077	0.69167	0.229058	0.51365
MMP2	0.51239	0.038124	0.347722	0.0151241	0.292657	0.329833
MMP25	0.235984	-0.137207	2.01643	1.93488	1.54539	2.29541
MMP26	-0.421708	-0.444924	-0.299937	-0.773491	-0.639707	-0.569425
MMP3	-0.712045	-0.884463	-1.18767	-0.643637	-0.930656	-0.997969
MMP7	-0.144598	-0.0089113	-0.696608	-0.410472	-0.461525	-0.662296
MMP8	0.251757	0.506189	-0.329598	0.252804	-0.121616	-0.273505
MMP9	-0.558025	-0.293185	0.417609	0.143389	0.217958	0.544001
MPI	0.353468	0.115143	0.41404	0.191462	-0.360331	-0.167311
MPO	-0.640129	-0.601218	-0.617008	-1.22237	-0.077773	-0.38568
MRPL34	-1.09153	-1.28017	-2.30901	-2.33538	-1.6562	-1.09659
MRPL45	0.479356	0.0804294	-0.552491	-0.927611	-1.24539	-0.0376111
MS4A1	0.214101	0.175028	0.0371883	0.618884	0.463837	0.639434
MSLN	-0.122146	-0.105072	-0.410102	0.180145	-0.20384	-0.182274
MST1R	0.0288195	0.0828354	-0.888348	-1.0178	-0.682447	-0.922188
MSTN	-0.251858	-0.656283	0.387571	-0.503691	0.268304	-0.023275
MTNR1A	0.383832	0.53045	0.446727	0.774927	0.183795	-0.0449142
MTNR1B	-0.0508005	-0.511527	0.451454	0.245931	0.067079	0.448926
MTOR	-2.29062	-2.92479	-2.71089	-3.35711	-2.51954	-3.76474
MTTP	-0.185214	-0.0077884	-0.47421	0.674664	0.547997	0.313481
MUSK	-0.143144	-0.263559	0.715452	0.987011	1.0749	0.672175
MVK	-0.733933	-0.364494	0.69887	0.110546	-1.06334	-1.17439
MYLK	0.0138593	-0.123106	0.433553	0.029	0.326926	0.808305
MYLK2	1.40135	1.15427	0.806707	0.567202	0.727541	0.109458
NAAA	-0.42748	-0.466863	0.0928165	-0.0077085	-0.0023012	0.106817
NAE1	-1.45578	-1.22472	-0.954115	-0.664658	-0.633095	-1.02416
NAMPT	0.166964	0.110633	-0.182633	0.0576381	-0.257366	0.469463
NARS1	-2.33749	-1.8554	-2.28669	-1.99033	-0.605447	-1.19206
NAT1	-0.607515	-0.645856	-0.505545	-0.882829	-0.175283	0.0838169
NCOA1	0.713926	0.911456	1.93204	1.77462	0.77175	0.696579
NCSTN	0.302069	0.491099	0.195063	-0.921083	-0.624883	-0.260246
NDC80	1.33429	1.16542	-1.39816	-1.70663	-0.640729	-0.704954
NDUFA1	-1.48847	-1.18015	-1.93111	-2.72094	-2.20485	-2.82912
NDUFA10	-0.511902	-0.892766	-2.73395	-2.3863	-2.16598	-1.2181
NDUFA11	-0.550136	-1.2864	-0.212672	-1.11685	-2.50009	-2.16972
NDUFA12	-0.294786	-0.166816	0.0880628	-0.129262	-0.546732	-0.33104
NDUFA13	-0.677036	-0.927557	-1.59816	-1.36951	-0.595966	-0.940794
NDUFA2	-1.7732	-2.05137	-2.34302	-2.15769	-1.94262	-2.30361
NDUFA3	-0.11158	-0.16157	-0.645905	-0.520478	-0.525757	-0.670033
NDUFA4	-0.632364	-0.679611	0.134988	-0.380538	-0.0809881	0.655688
NDUFA4L2	0.942494	0.57544	0.393551	0.0116362	-0.538084	-0.277558
NDUFA5	-0.606043	-0.518143	1.31766	0.98099	0.55542	0.707038
NDUFA6	-2.10272	-2.08293	-1.84064	-2.80208	-3.21146	-3.74792
NDUFA7	-0.0441856	0.175103	1.13038	0.498827	-0.103823	0.162875
NDUFA8	-1.15831	-0.779686	-1.68768	-1.89076	-1.70176	-0.282296
NDUFA9	-1.59288	-1.01177	-2.32725	-2.81835	-2.51456	-2.65904
NDUFAB1	-0.779907	-0.574849	0.233847	0.312011	-0.117512	-0.423511
NDUFAF1	-0.919417	-1.42441	0.560158	-0.310526	0.899553	0.427153
NDUFAF2	0.142494	0.452007	-0.300365	-0.558568	-0.149494	0.0996285
NDUFAF3	-1.97643	-2.0926	-0.364366	-1.34124	0.321978	-1.19922
NDUFAF4	-1.51071	-1.56933	-2.49289	-1.53732	-1.89792	-3.04253
NDUFB1	-0.0944502	-0.0331544	-0.295905	-0.428747	0.180138	-0.206723
NDUFB10	-1.50524	-1.55871	-2.63877	-1.11987	-1.46647	-2.1988
NDUFB11	-0.809115	-1.44166	-2.38131	-3.90263	-2.70119	-1.4887
NDUFB2	-0.561921	-0.349784	-1.03206	-0.195515	-0.556643	-1.08825
NDUFB3	-1.3531	-1.68314	-1.02059	-1.43961	-0.742782	-0.76548
NDUFB4	-1.4473	-1.0918	-1.79808	-2.20304	-1.99155	-1.41047
NDUFB5	-0.698939	-0.891338	-1.42269	-1.96104	-0.919694	-1.79143
NDUFB6	-1.30587	-1.2026	-2.22752	-1.87479	-2.15703	-1.42787
NDUFB7	-0.958434	-0.763984	-2.69939	-1.87119	-2.20041	-2.3359
NDUFB8	-0.215527	-0.286013	-1.33387	-1.66218	-1.35516	0.196288
NDUFB9	-1.73945	-2.21977	-1.14378	-1.34813	-0.557537	-0.725198
NDUFC1	-0.233558	-0.492189	-2.24042	-2.04487	-2.6506	-2.45897
NDUFC2	0.473129	0.844225	0.189707	-0.707244	-1.24763	-0.439978
NDUFS1	-1.94026	-2.05759	-2.56853	-2.44992	-1.97326	-2.2413
NDUFS2	-2.50608	-2.72504	-2.27258	-2.28633	-3.58465	-3.26426
NDUFS3	-1.10156	-1.11899	-2.13159	-2.47995	-1.84701	-2.80793
NDUFS4	0.310797	0.165264	-0.0260252	-1.06424	-0.798578	-0.174035
NDUFS5	-1.60265	-1.28326	-1.81095	-2.15366	-2.06268	-2.47045
NDUFS6	-0.275598	-0.417882	0.0969736	-0.26633	-0.505468	-0.523571
NDUFS7	-0.633794	-0.758293	-2.63849	-1.84338	-1.47799	-0.733739
NDUFS8	-0.723294	-0.519889	-1.7412	-1.90146	-1.67024	-0.997395
NDUFV1	-2.38724	-2.57521	-1.48323	-1.63838	-1.81968	-1.95445
NDUFV2	-1.16318	-1.25735	-1.14111	-1.10412	-1.15633	-1.3399
NDUFV3	0.189485	0.141585	0.57882	0.0921782	0.320916	-0.204263
NEK1	-2.58722	-3.0485	-0.868735	-0.67858	-0.308793	-0.785922
NEK11	1.16807	0.748101	0.00456537	0.35288	0.868209	0.656668
NEK2	-0.848415	-0.733888	-1.52631	-1.12165	-1.1745	-1.50017
NEK3	-0.370203	-0.202167	-0.728118	-0.725596	-1.18968	-0.822027
NEK6	0.912476	0.587422	0.410937	0.0974747	0.4906	0.285083
NEK7	1.3313	1.07331	0.705589	0.655263	0.449416	0.538719
NFKB2	1.15046	1.35929	0.177172	0.708833	0.851037	0.12333
NGF	0.0705899	0.109187	0.289118	-0.0900645	0.691018	0.600455
NGFR	-0.306216	-0.239503	0.00615838	0.123844	-0.0183572	0.00627351
NLK	0.544645	0.445857	1.54019	1.3459	0.939748	1.43956
NLRP3	-0.73264	-0.698589	-1.20067	-1.10184	-1.20792	-1.23723
NMBR	-1.46372	-0.641599	-1.43795	-0.725248	-0.979998	-0.789961
NMUR2	-0.267814	-0.634188	0.0833856	0.110068	-0.590735	-0.291233
NOD1	0.340299	0.144654	0.894451	0.754202	0.702675	0.808565
NOD2	0.475349	0.421666	-0.322632	-0.246119	-0.493514	-0.530361
NOL9	-3.10578	-3.8663	-3.03999	-2.64492	-3.60205	-4.05716
NOS1	0.600382	0.610357	1.26958	1.1634	1.96933	1.46504
NOS2	0.264683	0.461072	0.826354	0.886315	0.717001	0.9844
NOTCH1	0.305376	0.469685	0.40845	-0.0337308	0.336751	0.833024
NOTCH2	1.05657	1.14093	1.07531	0.701926	0.943403	0.588193
NOTCH3	0.435755	0.519133	-0.0262924	0.276184	0.412317	0.688127
NOTCH4	0.614699	0.330346	1.08414	0.83346	1.14987	0.437359
NPC1L1	0.727875	1.1108	0.198582	-0.0737164	-0.274064	0.00949517
NPEPL1	-0.0025924	-0.208398	0.610209	0.295757	0.812368	1.04801
NPEPPS	-0.202869	-0.358107	-0.631411	0.00939523	0.29039	-0.496274
NPFFR1	0.951942	1.09588	1.48174	0.458576	0.455316	0.596532
NPR2	1.27156	0.802523	0.508036	0.659049	0.764229	0.682714
NPR3	0.0167839	-0.328815	0.862459	0.513097	0.312734	0.349264
NPY1R	0.0233263	0.388724	1.03883	1.04905	1.45275	1.2468
NPY2R	-0.270486	-0.46124	-0.505059	-1.19133	-1.54997	-0.807719
NPY5R	-0.457904	-0.884782	0.0859114	-0.301783	0.873377	0.27508
NR1D1	0.602409	0.463815	0.286559	0.441881	0.840552	0.877078
NR1D2	-0.277104	-0.0969322	-0.477978	-0.562646	-0.22969	-0.593767
NR1H2	0.501336	0.341215	0.690062	0.422501	0.45777	0.236666
NR1H3	0.110552	0.0994641	0.531372	0.72101	-0.250727	0.0553349
NR1H4	0.12017	0.591402	1.43139	0.531525	0.792404	0.653391
NR1I3	0.193124	0.178178	-1.47249	-1.46211	-0.9631	-1.53438
NR2E3	0.661772	0.660262	0.76704	0.749019	0.786834	0.519141
NR3C1	-0.356377	-0.218797	-0.391881	-0.884482	-0.645441	-0.75444
NR3C2	-0.402162	-0.32334	-0.161417	-0.266291	0.614295	0.141318
NRAS	-1.35998	-1.43085	-0.514572	-0.966753	-1.25528	-0.777387
NRF1	-1.20354	-1.82222	-0.867376	-0.312003	-0.740699	-0.872367
NRP1	-1.26131	-1.42566	0.651041	0.748097	-0.0622192	-0.480089
NT5E	0.968125	0.585437	-0.976804	-0.493895	-1.15901	-0.527768
NTRK1	0.571383	0.191563	-0.0545517	-0.38025	-0.187171	-0.340359
NTRK2	0.786198	0.501139	1.34556	0.694063	1.50331	1.54685
NTRK3	1.20658	1.26932	-0.0943736	-0.142977	0.252903	0.408182
NTSR1	0.238688	0.587862	-0.713503	-1.45952	-0.643526	-1.32208
NUAK1	-0.115795	-0.488368	-0.172079	-0.135891	-0.50507	-0.38592
NUCB1	-0.015706	-0.104605	0.0249077	0.815089	0.909271	0.739505
NUP85	-2.30316	-1.99454	-2.93073	-1.06747	-0.81978	-1.70058
ODC1	0.0720424	0.36136	-0.275389	-0.648961	-0.476293	-0.221652
OPRD1	0.16958	0.296104	0.759547	0.444559	0.015468	-0.0098408
OPRK1	-0.498346	-0.477216	-0.0065777	-0.232932	-0.944217	-0.733467
OPRL1	0.394638	0.333743	0.0467501	0.457927	0.188163	0.457081
OPRM1	0.295208	0.216185	0.513315	0.0890025	-0.055564	0.142731
ORAI1	1.60526	1.10727	-0.081845	0.0933274	0.722782	0.613752
OSGIN2	1.24634	1.33029	0.671106	-0.533399	-0.0732677	-0.645506
OXER1	1.17126	0.92968	0.296581	0.593171	0.545055	0.550578
OXSR1	0.181406	0.490724	-0.302058	0.415303	0.456936	0.0115792
OXTR	0.559527	0.492127	-0.0780861	0.145756	-0.259753	-0.258954
P2RX1	-0.374302	-0.403179	-0.665016	0.00972178	0.267323	0.0139777
P2RX2	-0.0650277	0.119314	1.05387	0.558375	0.43547	0.426368
P2RX3	0.802623	0.627898	-0.489385	-0.506582	-1.66995	-0.725701
P2RX7	-0.121055	0.0753824	-0.531218	-0.655951	-0.401573	-0.251027
P2RY1	0.752031	0.838993	1.78983	1.8319	1.78307	2.08547
P2RY10	0.684363	1.05733	-0.327933	1.33192	1.10831	-0.0143209
P2RY11	0.610092	0.324362	0.490803	0.588547	1.00946	0.321238
P2RY12	0.357753	0.104125	0.404574	0.634667	0.0129468	0.850328
P2RY13	-1.07588	-1.39134	-1.41519	-1.39664	-1.43666	-1.78469
P2RY14	-0.44995	-0.709156	-1.3129	-0.884305	-1.77071	-1.58451
P2RY2	1.58534	1.47633	0.0460984	0.949402	0.341656	0.307158
P2RY4	-0.103717	0.0749714	1.35757	1.45296	1.20863	1.03222
P2RY6	0.464145	0.566115	0.281711	0.64188	0.3456	0.549667
P4HB	-0.121531	0.0540652	0.365184	0.229602	-0.397658	0.329832
P4HTM	0.606588	0.591389	0.537002	0.434215	0.624123	0.633991
PADI1	-0.278406	-0.391614	0.269779	0.57985	0.518309	0.328436
PADI3	-0.0757792	0.00366878	-1.21046	-1.77524	-0.898796	-0.867357
PADI4	-0.501456	-0.479606	-0.176279	-0.327528	-0.0954753	0.0301636
PAH	-0.288852	-0.283342	1.96374	1.84814	0.432986	0.0956785
PAK1	-0.992685	-0.875999	0.849592	-0.322349	0.35027	0.191566
PAK2	0.85506	1.13525	-0.289465	-0.579088	0.43821	0.13096
PAK3	-0.171999	-0.126328	1.20933	-0.0023019	1.28659	0.430014
PAK4	0.714451	0.787758	0.0997155	0.454124	0.317477	0.47416
PAK6	0.54726	0.616142	-0.0193732	-0.264379	-0.324969	-0.579868
PANX1	0.641056	0.584014	1.14699	0.787958	0.820664	0.726636
PANX3	-0.270356	0.298644	0.566687	0.705678	0.755469	0.545054
PARP1	-0.303037	-0.475579	0.409632	0.219761	1.10291	0.385114
PARP2	1.42825	1.5118	0.233292	-0.193651	0.207756	0.436388
PARP3	0.530466	0.76209	0.631471	0.93547	1.43481	0.916293
PASK	1.66609	1.41446	1.02043	0.796106	-0.0135568	0.648098
PBK	-0.185561	-0.0539075	0.15601	-0.199368	0.203338	-0.132523
PBRM1	0.792489	0.515511	0.716494	0.212292	0.56206	0.463173
PCSK1	-0.470623	-0.805062	-0.507626	-1.2265	-1.12018	-0.902376
PCSK2	-0.52085	-0.282622	0.469545	0.714932	0.394114	0.350022
PCSK4	0.168508	-0.0639506	0.273724	-0.0285098	0.0834553	0.165134
PCSK5	0.539618	0.690773	0.0287993	0.412126	0.203411	0.280991
PCSK6	0.645558	0.604822	0.787297	0.585337	0.807154	0.490793
PCSK7	0.856509	0.825593	2.29979	2.30648	1.6075	1.49051
PCSK9	1.07231	0.875282	1.74823	0.952883	0.526536	0.701052
PDCD1	0.0060082	0.201148	0.733806	0.400116	0.297461	0.0820568
PDE10A	-0.692316	-0.537794	-0.078455	-0.289575	-0.854153	-0.0995445
PDE11A	-0.447676	-0.0800444	0.0886769	0.411983	-0.178645	0.03699
PDE1A	1.12473	0.988236	1.34913	0.548783	1.15537	1.06425
PDE1B	0.630167	0.892782	2.16049	1.30023	2.08329	2.11793
PDE1C	0.287756	0.235689	1.25356	1.40501	1.42687	0.519002
PDE2A	-0.0395125	-0.0056191	0.117392	0.183736	0.698538	0.699147
PDE3A	0.399032	0.516154	1.41177	1.23361	1.35944	0.835373
PDE3B	0.344327	0.413264	-0.142847	-0.548418	-0.54477	-0.652075
PDE4A	-0.0656561	0.156186	0.731142	0.462716	0.11304	0.129003
PDE4B	-0.879721	-0.970655	-0.534293	-0.321592	-0.520258	-0.630343
PDE4C	0.407528	0.680568	0.319324	-0.462249	0.0472536	0.12885
PDE4D	0.569157	0.513504	-0.0967043	-0.374129	-0.190964	-0.159338
PDE5A	-0.0749793	-0.147188	0.790513	0.930406	0.793801	0.431706
PDE6A	0.493674	0.800917	1.27358	1.99453	1.53124	1.37951
PDE6B	0.218756	0.141129	0.08589	0.342652	0.630553	0.571598
PDE6C	-0.521438	-0.846204	-1.55139	-1.42913	-1.16156	-0.805267
PDE6D	0.0989227	0.10761	0.806268	0.0489711	0.468013	0.0520767
PDE6G	0.0970986	0.235747	-0.892705	-1.06415	-0.486476	-0.770308
PDE6H	0.290689	0.53441	-0.0461046	-0.194343	-0.104404	0.0128297
PDE7A	-0.254478	-0.285926	0.239252	-0.318966	-0.196206	0.155187
PDE7B	-1.07841	-0.877955	-0.576061	-1.36769	-0.892404	-1.43709
PDE8A	-0.0602394	-0.103657	-1.03411	-0.195804	0.247423	0.560289
PDE8B	-0.438675	-0.907768	0.741908	0.737601	1.44248	1.4101
PDE9A	-0.112919	-0.0504807	0.671278	0.351787	0.494993	0.539151
PDGFA	1.07012	0.79676	1.4449	1.7586	0.826071	1.27512
PDGFB	0.788922	0.665527	-0.419159	-1.19899	-0.478619	-0.765878
PDGFC	-0.646253	-0.820373	1.3089	2.36903	1.66362	2.12503
PDGFD	-0.76009	-0.649051	-0.957408	-0.988644	-0.725843	-0.523519
PDGFRA	0.00173579	-0.0877654	-0.476037	-0.737353	-0.0098305	0.00491433
PDGFRB	0.326381	0.669456	-0.0661981	0.456972	-0.0641518	-0.206827
PDK1	1.05867	1.19039	-0.0493536	0.623798	0.686045	0.586555
PDK2	0.0989027	0.0481108	-0.0662653	0.763852	0.281395	0.392616
PDK3	0.789543	0.720434	0.152992	0.113797	0.86069	0.526947
PDK4	0.135935	0.302647	0.418617	0.0990561	1.03153	0.942061
PDPK1	-2.73912	-2.74059	-2.19086	-2.51013	-2.58272	-2.44205
PDRG1	-2.68087	-2.72892	-2.04626	-2.01199	-1.74777	-2.09763
PFKFB3	0.431918	0.645179	2.08002	2.76741	2.46515	2.1115
PGA5	-2.14085	-1.92468	0.0838361	0.747332	-0.375079	-1.01751
PGC	0.667603	1.00092	0.0340161	0.0929403	0.0847052	0.184705
PGF	-0.0130985	0.0816323	0.27889	0.916042	0.576175	0.494941
PGR	-0.548031	-0.471622	-0.467732	-0.429176	-0.587184	-0.620838
PHF8	-0.0520351	0.0439543	2.04102	2.10143	1.57942	1.16767
PHKG1	0.556362	0.533558	-1.24185	-0.515699	-0.659011	-0.537367
PHKG2	-0.303837	-0.547847	0.387574	0.708087	0.297774	0.107917
PI4K2A	0.761192	0.964501	0.660419	1.16139	0.392782	0.36873
PI4K2B	0.19048	0.331565	1.09737	0.907911	0.745936	0.591853
PI4KA	-1.37127	-1.02355	-1.83243	-1.19901	-1.98598	-1.54534
PI4KB	-0.253623	-0.569435	-0.0609335	0.0247944	0.833337	0.464748
PIK3C2A	-0.251072	-0.143101	-1.40238	-0.982049	-2.07596	-1.61904
PIK3C2B	-0.400201	-0.457752	-1.69169	-1.07799	-0.677554	-0.450578
PIK3C2G	-0.512071	-0.437736	0.768635	0.758657	1.51156	1.28882
PIK3C3	-3.43334	-3.15936	-3.43237	-3.78932	-3.43679	-4.13092
PIK3CA	-1.68427	-1.65447	-1.3589	-1.75054	-1.11265	-1.30542
PIK3CB	-0.244169	-0.0311274	-0.156779	-0.603752	-0.883415	0.246748
PIK3CD	0.351323	0.396602	-0.0745499	0.247667	0.292971	0.268632
PIK3CG	1.09794	1.36691	0.51251	0.22306	0.272706	-0.42455
PIK3R1	-0.888919	-0.62658	0.14009	-0.284693	-0.512172	-0.226188
PIK3R2	0.28214	0.113314	-0.0207284	0.247612	-0.217354	-0.271747
PIK3R3	1.07632	1.02682	0.635198	0.99716	1.1294	0.781205
PIK3R4	-0.340005	-0.0440442	0.231562	0.683948	0.419834	0.590509
PIK3R5	0.229574	0.137485	-0.569782	-1.00073	-0.389766	-0.0156235
PIK3R6	0.268173	0.329332	-0.379181	0.102156	-0.0999199	-0.586982
PIM1	0.176483	-0.0427968	0.522114	0.977372	1.10947	1.24332
PIM2	-0.407915	-0.566873	-0.94248	-1.61024	-1.33276	-0.919071
PIM3	0.824424	0.959687	1.97413	1.69691	1.87958	2.09821
PIP5K1A	1.43106	1.33485	0.228602	-0.193687	-0.626995	-0.545805
PKMYT1	-2.72872	-2.41358	-1.56462	-2.2328	-3.05434	-1.81502
PKN1	1.46653	1.35346	0.801673	0.451944	0.828296	0.878485
PKN2	1.00428	1.39154	0.938747	1.11764	0.796181	0.39251
PKN3	0.14861	-0.126897	-0.625721	-0.22233	-0.795633	-0.250741
PLA2G10	-0.672209	-0.892952	-0.0624899	-1.04911	-1.30428	-0.289743
PLA2G1B	1.43971	1.29387	0.501064	0.832147	1.36873	1.06284
PLA2G2A	0.2218	0.15527	-0.342438	-0.679219	0.00669222	-0.653085
PLA2G2E	1.1576	0.727691	0.127373	0.623985	0.551312	0.553132
PLA2G4A	0.816773	1.24768	-0.132315	-0.0094461	-0.606847	-0.488958
PLA2G5	-0.200151	-0.209915	0.175037	0.61508	-0.0373187	0.206983
PLA2G7	0.264458	0.207304	0.737598	1.02885	1.72409	1.08217
PLAT	0.00047667	-0.136291	-0.551841	-0.54237	-0.275774	0.310786
PLAU	-0.0858295	0.260379	1.49178	2.01568	0.828005	1.03957
PLCG2	-0.0466545	-0.169868	0.619631	0.785088	0.90396	1.29913
PLD1	-0.332622	0.135886	0.796592	-0.0266435	0.734669	0.575044
PLD2	0.651667	0.318179	1.82981	1.73101	1.59386	1.77897
PLG	0.226009	0.439964	0.946696	0.816718	0.798778	1.55948
PLK1	2.11607	1.7207	-0.511545	0.27634	-0.92908	-0.631381
PLK2	-0.355022	-0.29489	-1.27492	-1.34775	-0.717542	-1.30566
PLK3	0.344089	0.486845	0.229594	-0.0930711	0.513071	-0.0551515
PLK4	-3.36974	-3.19348	-2.94347	-1.53915	-0.823718	-1.15697
PMPCA	-2.75268	-2.30642	-2.21741	-3.06362	-4.55057	-4.10839
PMVK	-0.959324	-0.608678	-0.74888	-0.171609	-1.73332	-1.16471
PNLIP	-0.481545	-0.337311	0.454727	0.552745	0.357888	0.195952
PNMT	0.67712	0.906118	-0.008543	-0.908253	-0.0580325	-0.422125
PNP	0.762213	0.854394	0.224501	-0.13329	0.459386	-0.139054
POLA1	0.199637	-0.0951791	-0.0481315	1.83154	-0.378095	-0.547554
POLD1	-0.0633544	0.186717	1.07585	1.06025	0.640328	0.0366783
POLE	-1.68585	-0.422523	-3.3708	-3.18066	-3.04286	-1.73799
POLR1B	-1.54999	-1.16295	-0.872636	-1.86821	-0.862038	-2.74141
POLR2C	0.186203	0.311003	-1.21492	-0.763475	-1.23575	-1.19942
POLR2L	-1.52158	-0.935324	-1.40228	-1.11971	-1.23819	-0.369124
POLR3A	-1.57221	-0.931741	-1.53951	-1.51023	-0.365911	-2.28517
POLR3H	-2.53873	-1.90674	-4.09699	-5.40052	-4.62871	-4.31333
POLR3K	-2.06635	-2.91164	-1.9059	-2.207	-1.75534	-3.30984
PPARA	-0.574403	-0.403364	-0.33041	-0.251438	0.382647	-0.0241286
PPARD	0.611439	0.40736	0.303302	0.164673	0.452117	-0.0615686
PPARG	-0.887021	-0.672515	0.301766	0.345765	0.188003	0.283
PPAT	-0.675758	-1.26747	-0.723146	-0.666259	-0.784338	-0.755452
PPIA	-0.217443	-0.455326	-0.743993	-0.234343	-1.10795	-0.891271
PPME1	-0.759801	-0.829004	-1.18517	-0.472116	-0.63593	-0.831193
PPWD1	-2.43776	-1.87248	-2.39065	-2.16481	-1.55331	-1.58048
PRCP	0.290296	0.523241	1.71625	1.77667	1.77515	1.89809
PREP	0.00024473	0.158415	0.50831	0.547511	0.195187	-0.110339
PRKACA	0.363279	0.375789	-0.338851	-1.42275	-0.379039	-0.916607
PRKACB	-0.356184	-0.108177	-1.40997	-0.698515	-0.874106	-1.72505
PRKACG	-0.985324	-0.981692	-0.332008	-0.373202	-0.766018	-0.335301
PRKAR2B	0.696086	0.877753	1.60061	1.54322	1.4962	1.25985
PRKCA	0.0386735	0.240435	-0.147974	0.0958352	-0.105257	-0.0888624
PRKCB	-0.464229	-0.443176	0.208561	0.233235	-0.490731	0.0843109
PRKCD	-0.0241436	-0.351412	-1.25309	-1.29702	-1.24617	-0.830233
PRKCE	0.573965	0.552133	0.143621	0.181196	0.0726584	0.197803
PRKCG	-0.48133	-0.370954	0.518724	0.58288	0.0409695	-0.190604
PRKCH	0.33488	0.36621	-0.420904	-1.19388	-0.103037	-0.443634
PRKCI	-0.933567	-0.856019	-0.0899049	0.33972	-0.572651	-0.302814
PRKCQ	1.05807	1.04017	1.09957	1.29296	0.830629	1.21541
PRKCZ	1.06892	0.985593	1.03551	1.09724	0.9642	1.15278
PRKD1	-0.313327	-0.347122	-0.322824	0.33343	0.595524	0.2483
PRKD2	0.672001	0.371395	-0.773383	0.176017	-0.397291	-0.009689
PRKD3	-0.160937	0.132242	0.662171	0.528486	0.226088	0.630869
PRKDC	-1.61653	-1.48143	-0.811853	-1.05041	-1.25911	-0.476981
PRKG1	0.146627	-0.0496115	-0.725533	-1.02468	0.471617	0.193251
PRKG2	0.819115	0.740385	1.81027	2.22431	1.1064	1.92097
PRKX	-0.348655	-0.037416	-0.767249	-0.399796	-0.622328	-0.720066
PRLHR	-0.0222234	-0.126766	-0.396097	-0.479763	-0.187404	-0.411832
PRMT1	-1.88566	-2.31361	-2.70736	-3.18779	-4.30782	-2.6542
PRMT3	-0.815709	-1.01395	-0.61305	-0.0495009	0.325535	0.260621
PRMT5	-1.74515	-1.98942	-3.98941	-3.2795	-2.5964	-2.51561
PRMT6	-0.575527	-0.48444	-0.993661	-0.987464	-0.786149	-1.00158
PRMT7	0.496064	0.558328	0.0254057	-0.440024	-1.07197	-0.843136
PRMT8	-0.541763	-0.404969	0.550623	0.0825504	-0.122537	0.178829
PROC	-0.260008	-0.546331	-0.784848	-0.645347	-0.890495	-1.35071
PROKR1	0.150244	0.176317	1.0817	0.944046	0.869291	0.742012
PROKR2	-0.0498508	0.0196557	0.623908	0.120359	0.319159	-0.203779
PRPF6	-0.135513	0.211792	-1.17979	-0.863342	-0.581901	-0.634915
PRRT2	0.878597	0.812054	0.696412	0.565442	0.681496	0.729228
PRSS1	-0.427943	-0.229307	-0.754105	-0.730368	-0.578097	-0.552422
PRSS3	-0.463529	-0.402558	0.471325	0.534275	0.647255	0.452294
PRSS8	0.421917	0.183666	0.878249	0.728776	0.7044	1.08745
PRTN3	1.25193	1.22426	0.731767	0.800079	0.423127	0.266894
PSEN1	-0.100858	-0.106328	0.295618	0.710396	-0.307052	-0.183539
PSEN2	0.658154	0.682425	-0.691369	-0.0048119	-0.319593	0.767739
PSENEN	0.767239	0.547346	0.112368	0.393718	0.819179	1.49064
PSMA1	0.90306	0.933592	1.78111	0.804002	1.68236	1.83422
PSMA2	1.3324	0.375128	-2.96913	-3.3662	-2.25326	-0.973263
PSMA3	1.59293	1.56749	-0.3639	-1.3253	-0.818148	0.160349
PSMA4	1.2851	1.40155	-0.4121	-0.407339	-0.840544	-0.967356
PSMA5	0.432708	0.167086	0.53034	-0.385115	1.10904	-0.681192
PSMA6	2.63428	3.99822	-1.83159	-0.950743	0.168725	-1.75492
PSMA7	-0.161315	-0.513	-0.974766	-1.22742	-1.26007	-1.56415
PSMA8	0.0243654	0.165642	-0.887217	0.412928	-0.162796	0.172588
PSMB1	-1.40423	-0.686874	-1.5215	-1.77505	-1.53859	-0.974876
PSMB10	0.161165	-0.063414	0.231941	0.419961	0.243518	0.0526641
PSMB11	0.921249	0.699328	0.117754	0.380771	0.820976	0.731654
PSMB2	1.08108	1.46293	-0.229932	-0.803551	-0.163597	-0.900732
PSMB3	-0.230646	-0.70007	-1.52991	-2.28916	-2.44732	-2.98468
PSMB4	0.967859	1.32883	0.788498	-0.441038	-0.622271	-1.22112
PSMB5	-0.691975	0.308904	-0.839608	-1.07961	-0.413619	-0.566033
PSMB6	2.31131	1.92629	0.693085	0.676725	0.74901	0.708357
PSMB7	2.21025	2.33261	1.85346	0.342376	1.95997	1.53771
PSMB8	0.388129	0.500777	1.48792	0.501927	0.661252	1.22581
PSMB9	0.165807	-0.0820001	0.376946	0.506159	0.831763	0.526526
PSMC1	0.572843	0.918609	-0.150843	-0.701026	-0.8632	-0.930038
PSMC2	0.44377	0.138991	-0.0553406	-0.273495	-0.866591	-0.623993
PSMC3	2.04907	1.52727	1.77297	1.50217	2.11237	1.38671
PSMC3IP	-0.126243	-0.440762	-0.134934	-0.323751	0.478182	0.108893
PSMC4	1.27261	0.928204	-0.155532	-1.11167	-1.169	-1.57363
PSMC5	1.66336	1.16628	0.00677438	-0.0848097	0.804744	-1.05362
PSMC6	-0.134601	0.40114	-1.26583	-0.907929	-1.01665	-0.925698
PSMD1	0.164951	0.469612	0.284113	-0.189986	0.00623687	-0.4411
PSMD10	0.0508037	-0.108687	-1.35539	-1.31816	-1.81955	-1.25362
PSMD11	1.70843	1.70565	-0.569729	-0.414359	-1.98654	-0.502954
PSMD12	-0.0937543	0.353915	-0.881771	-0.940068	-1.31148	-2.14027
PSMD13	-0.929188	-0.103931	0.432052	-0.178412	-0.46153	-0.126903
PSMD14	-0.87239	-0.251729	-0.728254	-2.05099	-1.39449	-2.6745
PSMD2	1.06016	0.732997	0.472542	0.510913	0.625524	0.734933
PSMD3	0.195949	-0.218541	-0.812934	-1.58749	-1.80556	-1.89313
PSMD4	-2.69065	-2.37465	-2.79616	-3.32959	-2.52946	-2.02122
PSMD5	-0.0469959	-0.25259	0.920255	0.673421	0.34335	-0.115138
PSMD6	0.402479	-0.101961	0.26865	0.549957	-0.873445	0.329938
PSMD7	0.243803	0.64595	-1.94545	-2.00497	-2.51309	-0.991726
PSMD8	0.69319	0.617878	0.672277	-0.852668	0.942376	-0.176898
PSMD9	1.07865	0.898957	0.0407045	0.409549	0.0965899	0.343682
PSME1	0.967264	0.532926	0.487228	0.581195	0.25297	0.0626366
PSME2	1.17124	1.25514	1.25953	-0.39496	-0.269512	0.526938
PSME3	-1.68121	-1.5954	-1.71317	-1.77606	-1.11683	-1.38562
PSME4	1.15273	1.63495	0.799418	1.78457	2.01923	1.15553
PSMF1	-0.612342	-0.729502	-1.17905	-1.42844	-0.358127	-0.635058
PTAFR	-0.410622	-0.794897	-0.788935	-0.380816	-0.0691342	-0.1301
PTCH1	0.390461	0.364437	2.35348	2.25003	2.31357	2.03467
PTEN	1.0379	1.02863	2.06682	2.26807	3.00929	2.49717
PTGDR	0.516687	0.75979	-0.679015	-0.706043	-0.077909	-0.36811
PTGDR2	0.390037	0.179195	0.448478	0.368467	0.127891	0.112263
PTGER1	-0.350151	-0.186713	0.541221	0.748968	0.346286	0.618164
PTGER2	1.72731	1.34205	1.45921	1.71728	1.91909	1.71608
PTGER3	-0.441582	-0.742241	0.431047	0.0196684	0.316875	0.48132
PTGER4	0.0900538	0.527736	0.931053	0.222772	0.521011	0.0761922
PTGFR	0.113804	-0.0229328	-0.0123712	-0.157554	-0.278395	-0.206681
PTGIR	0.861994	0.446662	2.45838	1.41547	1.21098	0.980431
PTGIS	0.293378	0.499594	0.942218	0.863857	1.39948	0.919302
PTGS1	0.179846	0.208318	0.661613	0.779363	-0.0259922	0.56561
PTGS2	0.803777	0.908438	-0.646852	-0.212431	-0.015958	0.0659712
PTH2R	-0.726066	-0.354789	-1.20702	-1.01188	-0.372847	-0.401563
PTHLH	0.527374	0.335293	1.07628	1.49094	1.51313	1.21459
PTK2	-0.729688	-1.32802	-2.566	-1.78743	-2.35161	-2.00051
PTK2B	0.416834	0.217904	1.50832	1.63849	1.1539	0.938668
PTK6	-0.0229569	0.06659	0.212803	0.361008	0.0989734	0.0582074
PTPMT1	-2.12771	-2.56653	-1.0175	-1.10471	-0.822259	-0.884721
PTPN6	1.18622	1.24675	1.22604	1.63822	1.57351	1.17814
PTPRF	-0.484848	-0.410859	0.313187	0.168661	0.515708	0.306863
PTPRG	0.0140231	-0.0290413	-0.604687	-0.686096	-1.4698	-1.07418
PTPRM	-0.857093	-0.707449	0.0482414	-0.170406	0.0482336	-0.109967
PTPRS	0.780214	0.555932	0.331704	-0.0020995	-0.107425	-0.0154334
PYGB	0.817785	0.77401	0.0427493	0.267661	0.486127	0.517319
QPCT	0.626746	0.807476	-1.13262	-1.1769	-0.203845	-0.583598
QRFPR	0.4298	0.370492	1.31233	1.13452	1.7204	0.842642
RAB27A	1.16447	1.60554	-0.686735	-0.232503	-0.408672	-0.0913415
RAD51	-4.59817	-4.96862	-2.78225	-1.38082	-3.43793	-2.92854
RAF1	-0.797969	-0.931584	-1.42426	-1.96009	-0.967271	-1.87736
RAMP3	-0.72569	-0.201976	0.839026	0.53676	0.131846	0.18539
RAN	3.10312	3.02278	-1.25138	-0.85141	0.96592	0.533657
RAPGEF3	0.864354	1.08096	1.75999	0.853732	1.06121	1.25064
RAPGEF4	-0.321664	0.0397789	-1.18598	-1.20909	-0.593302	-1.03189
RARA	-0.368506	0.00621919	0.564061	1.15965	1.01825	1.3322
RARB	0.617277	0.320285	1.32176	0.807261	0.223436	0.264252
RARG	0.0843963	-0.314918	-0.061549	0.0892617	-0.518037	0.215831
RBBP9	1.03947	0.889053	2.15657	2.03994	2.08114	2.35427
RBP4	0.278797	0.363313	-0.286619	-0.0359953	0.545246	0.615128
RBX1	-1.66277	-1.56843	-1.80322	-1.56409	-2.08214	-1.7364
RCE1	0.628337	0.603762	0.604715	-0.299743	-0.507364	-0.910765
REN	0.0530221	0.054386	-0.0446803	-0.0392024	0.031779	0.0382152
RET	0.709055	0.530348	1.18094	1.34099	1.24996	0.503729
RFC3	-2.52239	-2.95244	-2.03549	-4.04452	-3.02125	-2.40592
RFC4	-0.154667	-0.544722	-0.596673	-1.7838	-0.870523	-1.13306
RHD	0.232554	0.337687	0.507947	0.828002	0.432705	0.376208
RICTOR	-1.19746	-0.582042	-0.890786	-0.999096	-0.298441	-0.27264
RIPK1	-0.0557973	0.460541	1.42433	1.3361	1.46223	1.42955
RIPK2	-0.0862548	-0.0741698	0.193488	-0.0077989	-0.253307	-0.275411
RNPEP	-0.221704	-0.060571	-1.8656	-0.443351	-0.110545	-0.623387
RNPEPL1	-0.0371516	0.0353156	0.221238	-0.575878	-0.546369	0.0343284
ROCK1	1.6191	1.19325	1.81272	0.853761	0.952248	1.5678
ROCK2	0.990878	1.05773	1.50174	0.74609	0.672378	-0.325479
RORB	-0.164957	-0.0993089	-0.228061	-0.448375	-0.0160348	-0.296331
RORC	-0.536089	-0.568666	0.0396162	0.36843	-0.127968	-0.149697
ROS1	-0.0597893	0.250082	1.22581	1.59632	0.492765	0.51792
ROSA26	0.0711862	0.073414	-0.0258776	-0.0200953	0.0502829	0.0561923
RPE65	-0.143579	-0.343641	-0.0557263	0.235067	-0.206474	-0.0630408
RPL11	-0.0829783	0.380549	0.371129	0.0329871	0.182883	-0.181399
RPL18	-0.54912	-0.237682	0.393341	0.459852	1.15298	1.67799
RPL18A	1.33921	0.12844	0.113327	-0.666748	-0.533257	-0.149597
RPL27A	0.194033	-0.104417	-2.08193	-1.56823	-1.60105	-1.55069
RPL3	0.9294	0.377726	0.139642	0.540816	-0.34465	-1.15015
RPL35	0.0114541	0.491428	-1.11071	-1.17741	-1.22722	-1.63585
RPL37A	-0.141752	0.0224981	-1.29966	-1.18963	-0.682204	-0.533363
RPL4	-0.952774	-2.40594	-2.6591	-2.75089	-3.50489	-1.92823
RPS11	-0.755604	-0.608644	-1.60272	-1.79667	-1.88961	-0.896134
RPS6KA1	-1.09336	-0.957572	-0.200328	-0.05377	0.201691	0.350504
RPS6KA2	-0.654977	-1.27598	-0.434871	-0.531556	0.156335	0.0199524
RPS6KA3	1.09507	1.12131	1.5091	1.49651	0.281579	0.788544
RPS6KA4	-0.21946	0.0525243	1.77472	1.14375	0.150948	1.0828
RPS6KA5	-0.1434	-0.0334584	0.291824	0.544825	0.822834	0.936406
RPS6KA6	0.759957	0.643649	0.575996	0.484721	0.111878	0.687102
RPS6KB1	-1.04532	-1.36888	-1.54764	-1.77056	-1.09298	-1.70564
RPS6KB2	-1.26001	-1.24128	-0.311492	-0.825843	-1.13267	-0.679348
RPS8	-1.21859	-1.51708	0.422491	-0.198287	-0.913358	-1.68608
RPS9	0.699105	0.838029	-0.439372	-0.246945	0.613105	0.614062
RPTOR	-2.13901	-2.18724	-1.82192	-2.49462	-2.83265	-1.87922
RRM1	3.60005	4.36687	2.4001	1.66989	2.96305	2.68931
RRM2	3.73679	3.54505	3.31203	3.31343	3.56082	2.90481
RRM2B	0.958132	0.848643	-0.610569	0.0778634	0.0498368	-0.420149
RTN4	0.562221	0.364502	1.89079	2.48072	2.05687	1.86539
RUVBL1	-0.682562	0.647406	2.215	2.24414	1.05773	1.8854
RUVBL2	-0.86054	-0.522315	-1.15917	0.326642	0.238853	0.669819
RXFP1	0.507101	0.266241	0.233385	-0.0578872	0.30026	0.386003
RXFP2	-0.084056	-0.230455	1.47223	0.67194	1.17705	1.89508
RXFP3	0.575991	0.5923	0.488026	0.710819	1.27237	0.915707
RXFP4	0.669091	0.51778	1.33238	1.88983	1.09604	1.43316
RXRA	-0.203358	-0.370824	-0.351438	0.0209523	-1.07697	-0.382109
RXRB	0.252293	0.154669	0.096934	0.53783	0.131768	-0.157573
RYR1	-0.583542	-0.378974	0.134871	0.208841	0.0786761	0.506883
RYR2	-0.185227	-0.229446	-0.151148	0.629071	0.06012	-0.210241
RYR3	0.310191	0.276457	0.567532	1.19723	1.14012	0.534234
S1PR1	0.988556	1.15194	2.15102	2.74517	2.42296	2.3694
S1PR2	0.736422	0.845621	0.509232	0.832392	0.604754	0.345595
S1PR3	0.960941	0.903556	1.02	0.656729	0.355916	0.318542
SBK3	0.674547	0.629702	0.319423	0.417375	0.408388	-0.512021
SCN10A	0.199143	0.30377	0.884595	1.17649	0.789781	0.865185
SCN11A	0.0821873	0.413163	0.347516	0.695662	0.341481	0.530955
SCN1A	-0.974403	-0.20571	0.759018	1.10358	0.908813	0.731216
SCN2A	-0.807472	-0.725307	-0.0241394	0.29792	0.226152	0.533534
SCN3A	0.781892	0.941376	-0.26881	-0.128255	0.120714	-0.497031
SCN4A	-0.298339	-0.430966	2.13482	2.09687	1.93171	1.36804
SCN5A	-0.235563	-0.478829	-0.674442	-1.27387	-1.1502	-1.34253
SCN7A	0.409317	0.773657	0.0998709	-0.068527	0.504745	-0.242646
SCN8A	-0.252943	-0.440646	0.0852737	0.307897	0.821478	1.07162
SCN9A	0.680655	0.891764	0.556855	0.659835	0.776108	0.901154
SCNN1A	1.20902	1.32947	1.08433	1.60041	1.15385	0.741675
SCNN1B	0.00554491	-0.0148817	0.130581	0.152372	0.104301	-0.26285
SCNN1G	0.890305	0.760081	0.0956321	0.158604	-0.415633	-0.074838
SCTR	-0.229384	-0.271758	0.747143	0.919751	1.17363	1.09733
SELE	0.110765	0.508041	0.0146271	0.235126	1.19853	1.01973
SELL	-1.16326	-1.10577	-1.935	-1.82035	-2.41814	-2.05984
SELP	0.619661	0.527287	0.666394	0.456594	0.164835	0.4664
SENP1	0.0987212	0.104235	-1.14008	-1.1559	0.328508	-0.430201
SENP8	0.187362	-0.0480247	0.707767	0.975153	0.452808	0.706785
SERPINA1	0.517172	0.862331	0.413782	0.415022	0.950772	1.27131
SERPINA3	-0.432698	-0.639309	1.3223	1.80505	1.00052	1.2578
SERPINC1	0.0313152	-0.185826	-1.25364	-1.91782	-1.87277	-1.86067
SERPINE1	0.926182	0.837691	1.38949	1.1943	1.2709	1.3123
SERPINF1	-0.79265	-0.921264	-0.0988946	-0.0619076	-0.13157	-0.306443
SETD2	-0.66717	-0.413309	-0.396615	-0.147421	-0.15088	-0.151751
SETD7	-1.22021	-0.909188	-0.819662	-1.35651	-0.933152	-1.13037
SGK1	-0.306978	-0.494724	-1.43625	-0.745761	-0.903765	-1.57567
SGK2	-0.725516	-0.789867	1.06435	0.981574	1.36906	0.819847
SGK3	0.437253	0.698046	1.15568	0.409971	0.0749861	0.803721
SGMS1	-0.546318	-0.46176	0.804716	0.825667	0.456435	0.662504
SGMS2	0.129323	0.207355	-0.730769	-0.0179483	-0.0190637	0.161247
SGPL1	-0.219446	0.301428	-1.1114	-0.184624	0.0539175	0.030529
SHQ1	-0.5198	-0.726701	-1.17119	-1.43631	-2.07752	-0.467884
SIGMAR1	0.230699	0.228873	-0.579039	0.625343	-0.128521	-0.0172836
SIK1	-0.249626	-0.338169	1.41572	0.22411	0.253675	0.924468
SIK2	0.559326	0.452594	-0.286793	-0.378084	-0.864916	-0.514932
SIK3	-0.78526	-0.692192	1.7533	1.69756	0.823465	1.10924
SIRT1	-0.430174	-0.213898	0.414917	0.648205	-0.0526243	0.688226
SIRT2	0.147021	0.0843773	1.09041	0.614802	0.706584	0.584625
SIRT3	-0.0264935	-0.0490497	-1.1989	-0.947568	-0.410012	-0.360147
SIRT5	-0.397636	-0.0597911	0.644184	0.551506	0.755343	0.948822
SIRT6	-0.0506821	0.0397417	-0.248848	-0.224445	-0.510415	-0.262877
SLAMF7	-0.939382	-0.89343	-0.918513	-0.76541	-0.034141	-0.425989
SLC10A1	-0.192513	-0.0491492	0.68739	0.483243	-0.0889301	0.502623
SLC10A2	0.502749	0.136722	0.833376	0.677605	1.16873	0.883324
SLC11A2	0.208686	0.127645	1.82649	1.14546	1.7952	1.62816
SLC12A1	-0.969345	-0.505396	-1.12351	-0.590796	-0.870113	-1.23567
SLC12A2	0.00638001	-0.296018	0.859405	0.307202	0.767044	0.399673
SLC12A3	1.75492	1.25056	-0.260843	0.584618	0.474919	0.354482
SLC12A4	0.941926	0.833712	1.03898	1.36222	0.802738	0.953501
SLC12A6	-1.19606	-0.989427	0.0155889	-0.713453	-0.46988	-0.57692
SLC12A7	0.197289	-0.291125	-0.220688	0.038859	0.225942	0.927424
SLC15A2	0.805315	0.776777	0.921647	0.502742	0.711995	0.270234
SLC16A1	-1.8132	-1.19952	-0.533237	-1.48296	-0.429495	0.061086
SLC16A7	-1.21779	-0.715417	-0.577654	-0.102821	-0.108907	-0.437526
SLC17A9	0.373822	0.312505	0.795334	1.0114	0.556368	1.10338
SLC18A1	0.912339	0.820144	1.07222	1.30789	1.84158	1.14673
SLC18A2	0.469215	0.550741	-0.499211	-0.463898	0.229597	-0.21897
SLC19A1	0.252524	0.177055	-0.761525	-0.901136	-0.695229	-0.336049
SLC1A2	0.248176	0.275713	0.0180103	-0.032252	-0.576896	-0.780502
SLC1A3	1.339	1.36959	-0.502306	0.407064	0.11907	-0.376064
SLC1A5	0.953137	0.620193	0.884172	0.710315	0.10237	0.488873
SLC1A6	0.409	0.673372	-0.613863	-1.26252	-0.285192	0.0927351
SLC1A7	-0.0334416	-0.092559	0.134565	-0.104265	-0.0469525	-0.29235
SLC22A1	-0.196303	-0.0934835	-0.245749	-0.296289	-0.465452	-0.297322
SLC22A11	1.19045	1.2252	1.42726	1.67841	1.90929	1.90278
SLC22A12	0.00070162	0.3513	0.100322	0.487876	1.33466	0.397756
SLC22A2	-0.168971	-0.267446	-0.631507	-1.27331	-0.561225	-0.399892
SLC22A6	-0.128272	-0.221643	0.820244	0.997736	1.01158	0.952102
SLC22A8	-0.27124	0.0910717	-0.523475	-0.773335	-0.855676	-1.06479
SLC23A1	0.399616	0.422095	-0.174609	-0.240405	0.0130217	-0.0859235
SLC25A1	0.472525	0.598231	-0.146192	-0.246488	0.205409	0.116833
SLC25A4	-1.06877	-1.06199	-0.560104	-0.73605	-0.138341	-0.80162
SLC27A1	0.881761	0.685225	1.1121	1.19806	1.15573	0.823198
SLC28A2	0.318188	0.230129	0.51247	0.743905	0.587436	0.0326319
SLC28A3	-0.407421	-0.230364	0.362243	0.0233167	0.207429	-0.0568063
SLC29A1	0.75702	1.0009	0.585649	0.911691	0.404132	0.736263
SLC29A4	1.02611	1.12818	1.48393	0.961354	1.19454	1.33599
SLC32A1	0.667696	0.61557	-0.0747717	0.435624	0.38787	0.512433
SLC36A1	-0.428183	-0.403778	-1.03389	-0.91946	0.161093	-0.672674
SLC44A1	-1.08423	-1.24738	0.714643	0.323428	0.0177082	0.40821
SLC47A1	0.456514	0.250726	1.33751	0.887975	0.801946	1.25785
SLC5A1	0.589473	0.20027	0.108996	-0.24668	0.0006029	-0.40362
SLC5A11	0.396132	0.265784	0.528341	-0.18906	0.199383	0.313168
SLC5A2	0.321041	0.433891	-0.777112	-0.0963451	-0.0654229	-0.276543
SLC5A3	-0.157124	-0.114656	0.659586	0.5806	0.173636	0.0682692
SLC5A7	1.53372	1.62479	0.377078	0.621964	0.511768	1.22646
SLC5A8	1.0019	1.09952	0.400488	0.433814	0.99691	0.551717
SLC6A1	-0.646779	-0.48192	-1.00524	-0.415515	-0.171968	-0.179715
SLC6A12	1.06192	1.10774	-0.385152	-0.0658509	-0.162559	0.293442
SLC6A14	-0.521567	-0.64455	-0.241347	-0.0300075	-0.0259743	-0.0103206
SLC6A15	-0.22893	0.180987	0.667961	0.622821	0.853454	0.282899
SLC6A19	0.575214	0.600502	-0.0437251	0.518504	0.407869	0.562063
SLC6A2	0.943892	1.2622	0.244846	-0.276204	0.0143702	0.242775
SLC6A3	1.31597	0.624631	1.47222	1.88771	1.65569	1.83156
SLC6A4	0.542307	0.404516	0.699989	0.177251	0.634106	0.649162
SLC6A5	-0.223174	-0.499563	0.0987977	-0.0365014	0.434973	0.793826
SLC6A7	-0.478964	-0.303638	0.382881	0.245873	-0.0517168	0.514694
SLC6A9	0.290013	0.319496	0.0766387	-0.202634	-0.172943	-0.229146
SLC7A5	-0.0991544	0.0656206	0.457013	0.192488	-0.654192	-0.0609211
SLC8A3	0.810932	0.755802	1.13292	0.536801	1.17313	1.38084
SLC9A3	0.0785899	-0.189903	0.463175	0.0121011	-0.413544	0.762828
SLC9A5	-0.210513	0.0343236	-0.0743837	1.03538	1.42468	1.35535
SLCO1A2	-0.0031866	0.137704	-0.471682	-0.829842	-0.4629	-0.353667
SLCO1B1	-1.60617	-1.41703	0.905886	1.62218	1.55937	1.12099
SLCO1B3	-0.75143	-1.08526	-1.56396	-1.50855	-1.44394	-1.18052
SLCO1C1	1.17484	1.44045	1.50173	1.26294	1.09992	1.42959
SLK	-0.807161	-0.329852	-0.97186	-1.68291	-1.80529	-1.78097
SMARCA4	-1.45819	-1.60676	-1.76274	-1.24472	-1.64116	-1.21243
SMC3	-1.02842	-2.08198	-1.16081	-0.654609	-1.10419	-2.10425
SMG1	-1.29849	-1.29078	-0.482954	-1.42412	-0.826052	-1.20133
SMO	0.245754	0.301977	0.355875	0.530244	0.656294	0.518738
SMPD4	0.145572	0.354591	0.251951	0.34852	0.746978	0.155066
SMYD2	0.0656452	0.0420101	-0.279183	-0.203645	-1.26249	-0.924006
SNAP25	1.16582	1.03646	1.40858	0.998768	1.75976	1.07569
SNCA	1.75244	1.09019	-0.169107	1.1584	1.2675	1.6859
SOD1	-3.58312	-3.47216	-1.36289	-1.58795	-1.94681	-1.18772
SOST	0.300494	0.295349	0.0185835	0.174069	0.904035	1.02097
AFG2A	-2.38179	-2.67629	-2.38529	-2.32534	-2.54032	-1.90198
AFG2B	-2.30176	-2.01313	-2.09064	-2.34618	-1.3326	-1.40018
SPC24	-1.84703	-2.31963	-0.708939	-0.166671	0.3954	-0.700581
SPHK1	0.721118	0.74924	-0.635318	-0.142382	0.154574	-0.192059
SPHK2	0.638299	0.347711	0.41797	0.0261395	0.421281	0.160822
SPP1	0.013563	-0.225916	0.112395	-0.55409	-0.35886	-0.144326
SPR	-0.404088	-0.194679	-1.13882	-0.978942	-1.10656	-0.492617
SPTLC2	0.697347	0.267149	1.16958	1.30337	0.921153	1.37107
SPTLC3	0.978013	0.881629	0.346896	-0.167441	-0.611246	0.294826
SQLE	1.11155	1.23658	-0.179871	0.492908	-0.315892	0.479223
SRC	-0.0433385	-0.0262156	-0.403036	-0.215402	-1.30138	-0.485695
SRD5A1	-0.334978	-0.540641	-0.536245	-0.655594	-1.02874	-0.220322
SRD5A2	-0.378517	-0.584811	-0.549472	-0.685281	-0.597419	-0.535978
SRD5A3	-2.4988	-2.60033	-3.8891	-3.10064	-1.20389	-2.96111
SRMS	-0.132582	-0.103592	1.0444	0.991443	0.687733	0.661785
SRP72	-1.99026	-2.66926	-1.53698	-1.04089	-2.24987	-2.60216
SRPK1	-0.419374	-0.650671	-1.00972	-0.514176	-0.475629	-0.892647
SRPK2	-1.11587	-1.25244	0.454715	1.26745	0.906587	0.0811427
SRPK3	0.482334	0.590753	0.270048	0.332028	-0.175879	-0.241756
SSTR1	0.172792	0.577127	-1.05856	-1.0703	-1.23901	-0.946824
SSTR2	-0.651465	-0.928005	-0.943665	-0.582191	-0.372498	-0.228128
SSTR3	0.980639	1.11963	1.68825	1.7	1.62871	1.71401
SSTR4	0.821856	0.673042	1.01541	1.05828	1.55772	0.634048
SSTR5	0.748103	1.00908	1.90164	2.72249	1.94117	1.76371
ST14	0.587253	0.448565	-0.775834	-0.910842	-0.950445	-0.818727
STAT1	-0.839959	-0.625009	-0.964752	-0.990101	-0.727505	-0.939402
STAT3	-0.690785	-0.444228	0.59159	0.433672	0.182934	0.577288
STK10	1.17002	1.08787	1.18361	-0.0720023	1.32349	1.00091
STK16	0.258541	0.0270209	0.694278	0.918498	0.957271	1.06489
STK17A	0.230962	-0.0058493	0.246743	0.901187	0.467187	0.0669558
STK24	0.660819	0.25863	0.356885	0.635923	0.427971	0.687686
STK3	-0.841172	-0.604294	-0.241628	-0.202256	-0.0345252	0.241746
STK31	0.938413	0.851924	-1.63992	-1.02136	-1.04208	-0.44681
STK32B	0.164197	0.13528	1.23617	-0.172325	0.440218	0.300204
STK33	0.43412	0.496596	0.27806	0.198228	0.571303	0.64372
STK36	1.19804	0.943247	0.560978	0.68928	0.775683	1.42532
STK38L	-0.930891	-0.565835	-1.72771	-1.20612	-0.968053	-1.52939
STK4	-1.02446	-0.764447	0.23405	-0.180901	-0.0591312	0.851933
STS	-0.481162	-0.392583	0.326488	0.677257	0.441446	0.29232
SUCNR1	0.85923	0.929806	-0.395037	-0.789911	-0.452411	-0.558782
SUPV3L1	-0.260891	-0.318001	-1.59081	-1.70246	-1.45231	-1.30203
SUV39H1	0.680672	0.7165	0.539165	0.948101	1.40017	0.883187
SV2A	0.0715247	0.326086	-1.35247	-1.189	-1.3331	-0.918507
SYK	0.96468	0.621984	1.7915	0.931066	0.203442	0.585944
TAAR1	-0.749891	-0.975705	-0.715532	-1.16843	-0.465048	-0.95964
TACR1	-0.367313	0.0378944	-0.794573	-0.998417	-0.307603	-0.550923
TACR2	0.844608	0.679084	2.15965	2.33551	1.65262	1.62874
TACR3	-0.706383	-0.361782	0.0191472	0.173647	-0.28412	0.090917
TAF1	-2.52755	-2.26957	-2.01501	-1.53129	-3.01392	-2.36412
TAOK1	1.93215	1.93745	1.82417	1.91865	2.10641	2.03846
TAOK3	0.340096	0.740373	-0.311788	1.1252	0.973196	0.384836
TAP2	0.0179325	0.391544	-0.0544186	-0.570614	0.119427	-0.29106
TASP1	0.342755	-0.0688026	1.70992	1.53646	1.35051	1.68093
TBCD	-2.38442	-2.08648	-0.391678	-1.01376	-0.79277	-2.45708
TBK1	0.4111	0.369127	-0.0549189	-0.258701	-1.0364	-0.0724295
TBXA2R	0.167372	-0.043746	0.723025	1.39438	1.00579	1.1144
TBXAS1	1.53311	1.1709	2.0096	1.82533	1.26698	1.30363
TDO2	0.823096	0.804048	1.90292	1.52694	1.10752	1.31837
TEC	-0.767472	-0.343978	-0.228053	-0.610425	-0.101761	-0.294316
TEK	0.457775	0.541786	0.503706	0.372207	0.893479	0.560132
TEP1	0.925541	0.841154	1.63857	1.64269	1.62831	0.5867
TERT	0.652444	0.652374	0.589318	-0.341676	-0.153004	0.297368
TESK1	-0.576784	-0.335039	0.246658	1.10408	0.494925	0.324498
TESK2	0.331474	0.291798	0.982721	0.793524	0.840137	0.854905
TGFB1	0.770897	1.01048	1.14559	1.01829	1.11052	0.864342
TGFB2	1.26416	1.55086	0.48635	0.889027	0.983296	0.975107
TGFB3	-0.176417	0.0798053	0.0227234	-0.100546	-0.652385	-0.641391
TGFBR1	-0.209819	0.179699	1.31169	1.29857	0.758307	0.989678
TGFBR2	0.762697	0.786623	-0.562501	-0.528594	-0.632547	-0.327012
TGM2	0.664387	0.559119	0.956953	0.7482	0.318472	0.449548
TH	1.17191	1.19387	1.46153	0.865979	1.04437	0.920134
THOC5	-2.1574	-1.67817	-0.982511	-1.90067	-0.560804	-1.51504
THRA	-0.470718	-0.668163	-1.01952	-0.226555	0.335387	0.0657376
TIE1	0.32199	0.585693	1.42379	1.0695	1.22526	0.992389
TLR4	1.14465	0.904576	-0.18061	0.433956	0.327378	0.854806
TLR7	0.0877881	0.492513	1.225	1.44459	1.39163	0.845268
TLR8	0.00144821	-0.178176	1.08529	0.687243	0.949117	1.24159
TLR9	0.389402	0.273179	-0.337335	-0.242524	-0.686597	-0.467371
TMEM199	-2.51776	-1.97514	-2.44828	-2.26254	-1.30768	-2.38009
TMPRSS11D	0.722798	0.620266	0.721024	0.240174	0.125458	0.525298
TMPRSS2	0.662022	0.419393	0.25631	-0.210815	0.247259	0.522682
TMPRSS6	0.454787	0.32322	0.982989	0.590068	0.632197	0.566881
TNF	0.117199	0.315216	1.24642	1.4456	0.827525	0.695977
TNFRSF4	0.483712	0.195468	-0.930083	-0.842434	-1.26159	-0.970495
TNFRSF8	0.465119	0.160246	0.173123	0.320807	0.452146	0.650879
TNFSF11	1.40396	1.0617	0.486264	0.571465	1.05668	0.512236
TNFSF13	0.00856535	0.330133	-0.19852	0.433399	1.32066	0.677189
TNFSF13B	-0.646081	-0.312653	0.284808	0.406785	0.300805	0.0224263
TNFSF14	0.816782	0.686912	1.0373	0.259141	0.573783	0.925285
TNFSF4	0.51739	0.423734	-0.645231	-0.145816	-0.730727	-0.651854
TNIK	-0.126307	0.0382414	1.31857	1.83411	0.947135	0.85396
TNK1	0.69836	0.998877	0.421886	0.74651	1.29171	1.16115
TNK2	0.884833	0.887075	-0.336821	-0.343764	-0.509375	-0.202481
TOP1	-1.71956	-2.34107	-1.65598	-2.5977	-3.1151	-3.32806
TOP1MT	-0.251138	-1.10751	-0.701423	-1.18267	-0.84479	-0.811274
TOP2A	-3.4793	-3.00489	-4.05728	-3.62342	-4.83604	-3.32354
TOP2B	-1.30071	-0.857656	0.339625	0.331469	-0.40116	0.23586
TP53	0.343257	0.506826	0.478403	0.614434	-0.289217	0.180161
TPH1	-0.269375	-0.724051	-0.64425	0.0744531	-0.0597971	0.0999384
TPH2	-0.359797	-0.164102	-0.68587	0.201133	-0.404589	-0.201266
TPO	0.767096	0.794375	0.630263	0.287113	0.272544	-0.500241
TPP2	-0.494318	-0.515299	-0.783554	-0.310825	0.327219	-0.0885337
TPSAB1	0.0578952	-0.334206	0.203686	0.631338	0.232896	0.690026
TPX2	-0.675539	-0.854281	-1.28377	-0.538939	-0.2385	-1.25197
TRAP1	0.486589	0.573122	-0.722166	-0.957528	-1.16339	-1.14884
TRIM24	0.987818	1.23884	2.11092	1.6134	0.609144	0.837066
TRPA1	-1.30205	-1.00636	-0.312191	0.614482	-0.800487	0.586805
TRPV1	0.439812	0.158777	-0.231275	-0.301656	-0.230409	-0.145007
TRPV3	-0.0531801	-0.342396	0.226035	-0.0747941	-0.663016	-0.821758
TRPV4	1.31048	1.36572	0.879748	0.51452	1.51436	1.10716
TSSK1B	0.550368	0.741609	1.21263	1.00588	1.49985	0.908662
TSSK2	0.687567	0.640236	-0.0154473	0.11876	0.774736	0.605422
TTK	0.976199	0.842756	-0.0214123	-0.383946	0.61053	0.23119
TUBA1A	0.64165	0.776356	0.4987	-0.276902	0.274243	0.628677
TUBA1B	0.277184	0.0291296	0.0259444	-1.04987	-0.14401	0.156412
TUBA1C	0.504481	0.756211	0.902892	1.72943	1.12017	1.57492
TUBA3D	0.209112	-0.112058	-0.0676979	0.608518	0.492863	-0.0315303
TUBA3E	0.246236	0.447684	0.385483	0.0736271	0.582476	0.648233
TUBA4A	2.09073	1.84392	1.25814	0.899261	0.697519	1.15898
TUBB	-0.989691	-0.773385	-0.610866	-1.80341	-1.76771	-1.06338
TUBB1	0.738156	0.553299	-0.205964	0.310426	0.365376	-0.106097
TUBB2A	0.359842	0.429644	0.322203	0.630974	0.530094	0.276923
TUBB2B	-1.31693	-1.44632	-0.111472	0.559039	-0.531902	-0.584643
TUBB3	0.86468	0.90504	1.07045	0.573651	0.738007	1.54121
TUBB4B	-0.642891	-0.412556	-2.24305	-2.11906	-1.65695	-1.79978
TUBB6	0.230081	0.192169	-0.545202	-0.535184	-0.902046	-0.886533
TUBB8	-0.908658	-0.612276	-1.14645	-1.42488	-0.817307	-0.673554
TUBG1	-0.408801	-1.0151	-0.806895	-0.471454	-0.486467	0.169622
TXK	0.804118	0.583814	0.827449	0.528862	1.39886	1.00489
TXN	-3.4737	-3.75815	-1.25956	-0.689781	-2.75617	-1.76084
TXNRD1	-0.60041	-0.798308	0.483247	0.668875	1.24139	1.26721
TYK2	-0.304941	-0.382063	-0.118227	0.0172635	-0.263246	-0.305751
TYMP	-0.337905	-0.307447	-0.107032	-0.73211	-0.535635	0.0267883
TYMS	-1.59337	-1.93287	-0.062887	0.179033	-0.193905	0.696477
TYR	1.03983	0.741028	1.93216	1.91028	1.7783	1.97101
TYRO3	0.612994	0.671831	1.26772	1.6839	0.346524	0.610727
U2AF2	-0.336277	0.147536	-0.527504	-1.42396	-1.15401	-1.59546
UBA1	-2.62731	-2.69663	-0.118233	-1.91917	-0.66631	-1.46355
UBA3	-2.67661	-1.89324	-1.89154	-2.95611	-3.69991	-2.82055
UCHL1	-0.252845	0.227147	-0.121741	-0.198783	0.110784	-0.426385
UCHL3	0.429437	0.12646	0.0731903	0.717817	-0.143636	-0.332475
UGCG	-0.574549	-0.482411	0.800337	1.27362	0.0287004	0.64447
ULK1	-0.160174	0.0960713	0.182944	0.0158678	-0.384288	0.439187
ULK3	0.273756	0.219528	0.629415	0.930735	0.561354	0.776316
UPF1	-1.03907	0.0224395	-0.452844	-0.339616	-0.93347	0.356688
USP1	-1.13618	-0.89063	-2.0742	-1.33735	-0.783907	-1.58106
USP14	1.3007	1.39049	-0.815023	-0.978823	-0.597668	0.235076
USP5	-1.30281	-1.51825	-1.71739	-1.17885	-1.62067	-1.61569
UTP20	-1.72624	-2.4122	-3.92329	-2.88041	-3.26858	-2.47959
UTS2R	0.254632	0.0400815	0.872707	0.956122	0.931869	0.952436
VAMP2	0.816511	1.05014	0.654233	1.44834	1.05151	1.35216
VARS1	-0.839058	-0.912435	-3.39969	-2.38924	-3.24556	-4.68859
VDR	0.122085	0.423381	0.00924906	0.727333	0.422843	-0.265757
VEGFA	0.474764	0.570325	-0.377243	-0.100737	-0.169739	0.13891
VEGFB	0.653529	0.692048	0.625366	-0.0509101	-0.390744	-0.247716
VEGFC	-0.378776	-0.218626	1.03396	0.453464	0.728569	0.847081
VIPR1	0.0653574	0.086521	1.04686	0.946455	1.18246	0.795445
VIPR2	-1.04711	-0.734742	-1.25871	-1.43359	-0.871797	-0.756475
VKORC1	0.394015	0.256557	-0.772103	-0.807349	-0.569198	-0.793908
VPS25	-1.96144	-2.22547	-3.03882	-2.45173	-2.48629	-4.5146
VWF	0.146919	0.362423	-0.743088	-1.05457	-1.03546	-0.282297
WDR5	-0.815078	-0.650497	-1.04237	-0.572824	-1.31689	-1.59304
WDR74	-0.0508526	-0.0777611	-0.422839	-0.423798	0.282184	-0.68846
WDR75	-4.03619	-3.34503	-3.27978	-3.39699	-4.60837	-4.43112
WEE1	2.87368	2.93286	0.729502	0.898255	1.29894	0.37401
WNK1	0.305753	0.116322	-1.44164	-0.897986	-1.22726	-1.38422
WNK2	0.13804	0.0990113	0.467955	-0.0231512	-0.0144441	0.677928
WNK3	0.18591	0.336183	-0.630893	-0.783264	-0.411814	-0.372053
XDH	0.435099	0.686881	0.389839	0.872439	0.79638	0.751199
XIAP	0.612412	1.21011	0.175075	-0.193235	0.407255	0.659216
XPNPEP1	-0.618838	-0.622526	0.218805	0.642364	-0.26531	0.295096
XPNPEP2	0.369899	0.409476	-0.602424	0.0763145	0.251749	-0.224419
XPNPEP3	0.259103	0.275036	-0.405608	-0.0694189	-0.278686	-0.559517
XPO1	-0.865149	-0.251038	-0.688546	0.319898	0.145988	0.748474
YARS1	-1.79114	-2.42021	-1.00634	-2.033	-0.885111	-0.898102
YARS2	-1.70825	-1.5069	-4.36926	-4.51837	-4.29416	-4.41734
YES1	-0.343054	-0.191515	-0.952364	-1.25327	-1.66609	-1.16608
ZACN	1.02562	0.978025	-0.0660432	0.0452439	-0.351029	-0.350844
ZAP70	1.24515	0.9951	0.878429	0.891127	1.15103	1.34423
Zhang_294	-0.307415	-0.746256	-0.403432	0.514207	1.02105	0.16464

## Sheet: Huh7-RR Z-score and hits
Gene	Huh7WT_DMSO_R1	Huh7WT_DMSO_R2	Huh7RR_DMSO_R1	Huh7RR_DMSO_R2	Huh7RR_RRF_R1	Huh7RR_RRF_R2		Huh7RR mono hits					Huh7RR combo hits
AARS1	-3.01795	-2.75129	-2.46977	-3.66021	-3.03431	-1.52646		Gene	Huh7WT_DMSO_mean	Huh7RR_DMSO_mean	diff (Huh7RR - Huh7WT)		Gene	Huh7RR_DMSO_mean	Huh7RR_RRF_mean	diff (RRF - DMSO)
AAVS1	0.191141	0.175071	0.290941	0.308809	0.242377	0.219349		ABCB4	0.999906	-1.00978	-2.00968		ALOX15B	-0.647602	-1.65287	-1.00527
ABAT	1.10565	1.22126	0.606902	0.675757	1.07088	0.0490962		ALAD	0.72288	-1.56193	-2.28481		APP	-0.130997	-1.51144	-1.38044
ABCA1	1.40865	0.504433	2.09828	2.87994	2.85162	1.33596		AQP7	-0.598095	-2.66045	-2.06236		CARM1	-1.58958	-3.67214	-2.08257
ABCB1	0.354768	0.348721	0.179653	0.328484	1.52764	0.919907		ATP1A2	0.972595	-1.24725	-2.21985		CDK2	-1.46898	-2.52538	-1.0564
ABCB11	0.862684	0.420375	-0.791466	0.145407	-0.857997	-0.0873008		ATP6V1A	-1.7875	-3.99382	-2.20632		CSNK2A1	-0.601331	-1.63831	-1.03697
ABCB4	1.33696	0.662853	-1.2395	-0.780054	-1.71664	-1.79982		BMPR1A	-0.174419	-4.15533	-3.98091		EIF5	-2.46973	-3.53671	-1.06698
ABCC1	0.424554	0.109538	-0.121464	-0.497353	0.198356	0.542162		C3AR1	0.36055	-2.07948	-2.44003		ELANE	0.0499872	-0.958994	-1.00898
ABCC2	0.621891	0.410446	-1.24489	-0.442214	0.332179	-0.243427		CALCB	0.299341	-1.98878	-2.28812		HDC	-1.33744	-2.3597	-1.02226
ABCC4	0.511022	0.847929	1.21514	1.37669	2.15778	2.22722		CCND1	-2.4283	-4.89843	-2.47013		INPPL1	-0.397506	-1.42198	-1.02447
ABCC5	0.317533	0.61475	-0.939181	-0.911112	-1.06892	-0.611917		CD3D	1.21442	-1.58637	-2.80079		JAK2	-0.0964048	-1.14386	-1.04746
ABCC8	-0.0299134	-0.359809	3.35417	3.31512	3.08312	2.47121		CDC7	-2.05607	-4.79526	-2.73919		KDM5A	0.377247	-0.686867	-1.06411
ABCG2	0.711137	0.0949431	0.842982	0.585543	1.26643	1.65053		CDK1	-1.23018	-3.41638	-2.1862		MRPL45	-0.941372	-1.9757	-1.03433
ABHD6	1.24405	0.294455	0.00194571	-0.373542	0.0549497	-0.254619		CHUK	0.441026	-1.56741	-2.00844		NDUFA11	-0.451797	-1.93523	-1.48343
ABL1	0.962858	0.976072	-1.00168	0.356372	0.397511	0.0229639		CLU	0.538734	-1.69987	-2.2386		NDUFA13	-1.26371	-2.66449	-1.40078
ABL2	-0.148449	0.0880278	0.357486	1.55675	1.55929	-0.20411		CYP11A1	0.328573	-1.81861	-2.14718		NDUFAF3	-0.762315	-2.10014	-1.33782
ACACA	-0.910989	-1.46662	-2.1812	-1.94376	-3.40738	-1.83511		DCLK3	0.925581	-1.76595	-2.69154		NDUFB9	-1.22999	-2.28395	-1.05396
ACACB	0.204537	0.156349	0.172559	-0.118616	0.0244043	0.468868		DLX3	0.939192	-1.06234	-2.00153		NDUFS6	-0.46808	-1.63146	-1.16338
ACAT1	0.343053	0.105248	0.425367	1.2383	1.44585	0.652613		EIF2AK1	0.57845	-1.48597	-2.06442		NPR3	-0.0127278	-1.0694	-1.05667
ACE	-0.308494	0.451611	-0.056198	-0.15409	-0.603035	-0.500367		ESRRA	0.017344	-2.13908	-2.15642		OXTR	0.19189	-0.98461	-1.1765
ACE2	-0.76033	-0.37114	2.05149	2.16889	1.59045	1.01255		FABP5	0.615926	-4.15685	-4.77278		PADI1	0.100592	-1.16081	-1.2614
ACHE	0.697874	-0.343245	-0.696839	-0.31836	-0.850931	-0.770738		FASN	-0.464063	-2.55546	-2.0914		PAK1	0.445394	-0.709757	-1.15515
ACR	-0.421839	-0.263136	-0.708054	-1.77654	-0.674193	-1.28257		FDPS	-1.18628	-3.96883	-2.78256		PIK3R6	0.383733	-0.721517	-1.10525
ACVR1	-1.60789	-1.4484	-2.00759	-0.957349	-1.13193	-1.9119		FES	0.699131	-2.22504	-2.92417		PSMC3	-0.623714	-1.83867	-1.21496
ACVR1B	0.787798	0.790878	1.30088	1.62453	0.373124	0.627018		GRM3	0.761717	-1.27964	-2.04136		SLC22A8	0.174166	-1.08614	-1.2603
ACVR1C	-0.244	-0.19153	0.449807	1.1507	0.336239	0.11705		GRPR	1.03272	-1.04196	-2.07468		SUCNR1	-0.103095	-1.24455	-1.14146
ACVR2B	0.00692462	-0.00307354	0.129828	0.97977	0.616414	0.0718163		GSR	0.676026	-1.34289	-2.01892		UBA1	-3.19792	-4.45927	-1.26135
ACVRL1	0.267873	0.201214	1.29747	1.71133	1.59696	1.22534		HEATR1	-1.00163	-3.43646	-2.43483
ADA	0.198013	1.12038	-0.114086	0.863464	0.792581	0.445837		HRH4	0.991009	-2.62841	-3.61942
ADAM10	0.38497	0.578515	1.47817	0.592697	1.22036	0.516931		HTR2B	0.421587	-2.46425	-2.88584
ADAM12	1.03072	0.631431	1.45877	1.58793	1.49947	1.20713		IL22	0.372945	-1.86837	-2.24132
ADAM17	-0.11884	0.522562	0.469405	0.605854	0.148249	0.119537		JAK3	-0.0386175	-2.08661	-2.04799
ADAM33	0.721575	0.362505	-0.660922	-0.728789	-0.579131	-0.689031		KAT5	-1.85474	-3.99917	-2.14443
ADAM8	0.415837	0.88337	0.107821	0.582376	0.0596818	-0.227182		KDM4A	0.459399	-1.81766	-2.27706
ADAM9	0.868194	0.608956	0.74887	1.66371	0.840503	2.50996		KEAP1	0.322465	-1.80929	-2.13176
ADAMTS1	0.199076	0.174024	-0.80959	-0.246057	-0.588145	-1.02589		LIPF	0.409239	-2.39216	-2.8014
ADAMTS4	-0.0716949	-0.121794	0.755153	-0.392371	-0.485296	0.303724		MC2R	0.669736	-1.78665	-2.45638
ADAMTS5	0.226755	0.669137	0.175499	0.276824	0.499759	-0.611566		MCHR2	0.694382	-1.30786	-2.00225
ADCY5	0.000346732	-0.32834	0.727213	1.05237	1.19306	0.840232		MKNK1	0.349259	-1.80767	-2.15693
ADCY6	-0.10107	0.10447	0.248547	0.117179	1.21775	0.290274		MPO	0.0558641	-2.12302	-2.17889
ADCYAP1R1	0.0429454	-0.0388436	0.824747	0.758697	0.716306	0.871561		NAT1	1.02274	-1.17843	-2.20117
ADGRG3	0.248852	-0.181414	1.25547	1.1841	0.934428	0.855915		NDUFS5	-2.28218	-4.37708	-2.0949
ADH1A	0.210819	0.618067	0.75675	1.26929	0.833491	0.842567		NLRP3	0.884524	-1.40911	-2.29363
ADH1B	0.208876	0.0741973	0.333181	0.271474	0.708639	0.648912		NPY2R	1.24726	-2.34755	-3.59481
ADH1C	0.664996	0.522025	-0.993337	-1.22451	-1.31266	-0.923558		PDE3B	1.03387	-2.03542	-3.06928
ADK	0.339114	0.90456	-0.746123	-0.226304	-1.02876	-0.807816		PDE6C	1.27587	-1.70058	-2.97645
ADORA1	0.588616	0.167335	0.613425	1.12319	1.02508	0.286273		PLK1	-1.28107	-3.72957	-2.4485
ADORA2A	0.487578	0.21061	-0.336914	0.112621	0.604606	-0.369893		PSMA3	-0.793827	-3.15769	-2.36386
ADORA2B	-0.203556	0.720558	0.174958	0.31573	0.0313528	0.796363		PSMC5	-1.10554	-3.66371	-2.55818
ADORA3	1.08031	0.530996	0.217215	1.00531	0.862305	1.10746		PSMC6	-0.901566	-4.91	-4.00844
ADRA1A	0.555528	0.902854	1.012	0.812828	1.18078	1.38603		PTGDR	0.87693	-1.72233	-2.59926
ADRA1B	0.791207	0.901522	0.069822	0.182644	-0.480094	0.235647		SELL	-0.0330406	-2.64365	-2.61061
ADRA1D	-0.0209795	-0.1563	0.34882	0.851276	0.283521	0.846374		SLC12A6	0.834575	-1.76044	-2.59501
ADRA2A	0.637232	0.547023	1.3506	1.67027	0.936769	0.41197		SPR	0.543248	-1.82004	-2.36329
ADRA2B	-0.250655	0.0294935	0.860385	0.541853	0.886745	2.07619		TGFB3	0.629829	-1.37185	-2.00168
ADRA2C	0.934977	0.65547	1.00616	0.538313	0.854787	0.890795		VEGFA	0.824242	-1.24019	-2.06444
ADRB1	1.15095	0.658998	1.23551	1.3307	0.842031	0.661134
ADRB2	0.411697	1.14648	0.139357	0.228739	-0.663188	-0.429657
ADRB3	0.201614	0.187419	0.257902	0.278129	0.20964	0.187965
ADRM1	-0.827067	0.181486	-1.38071	-0.774029	-0.0763862	-0.995529
AGER	1.21645	0.398929	2.35159	2.1014	2.37911	2.25202
AGRP	0.727179	0.604891	-0.205368	-0.121161	-0.532122	-0.0117709
AGTR1	0.613835	0.14167	3.14304	3.71319	3.9548	3.06767
AGTR2	0.686012	0.134559	1.04307	0.90265	1.26684	1.33577
AHCY	-0.100486	-0.277784	-0.503854	-0.60285	0.271606	0.59405
AKR1A1	0.841831	0.182425	-0.272778	0.0339901	-0.60725	0.803793
AKR1B1	0.262909	0.564871	1.15326	0.31894	-0.227971	-0.365938
AKR1C3	0.899041	0.517259	1.73161	0.782058	1.40825	1.75949
AKT1	0.436393	-0.301941	-0.200374	0.536469	0.161334	0.690651
AKT1S1	0.945719	0.360021	0.66064	0.831107	0.858582	0.927808
AKT2	-0.261326	-0.0304051	1.05202	0.83039	0.594058	0.0907799
AKT3	0.520596	0.396509	1.31269	1.22898	0.670806	0.62915
ALAD	0.852199	0.59356	-1.3067	-1.81717	-0.997115	-0.287913
ALDH2	-0.00816693	-0.134316	0.221519	-0.237745	0.201375	-0.263729
ALDH5A1	0.796157	-0.0586922	0.0400623	-0.240477	-0.510268	-1.00718
ALG2	-3.24328	-3.42366	-4.88494	-4.12577	-4.14076	-4.30624
ALK	0.90245	-0.0713079	-1.25232	-0.734918	-0.845366	-0.721563
ALMS1	-0.0385836	-0.272948	-0.462713	-0.298585	-0.900844	-1.20938
ALOX12	-0.68834	0.791065	-0.756575	-0.790924	-0.68069	-2.29175
ALOX15	0.492295	-0.502576	0.375889	-0.0599682	-0.560388	0.0866626
ALOX15B	0.705533	-0.380158	-0.820005	-0.475199	-1.65644	-1.64931
ALOX5	0.0439098	0.397044	0.0499123	0.321437	-0.343574	-0.370806
ALOX5AP	0.107335	0.206641	-0.500818	-0.346223	-0.973187	0.186214
ALPL	0.348674	-0.29853	0.854129	0.948407	2.16707	0.284096
AMH	0.640945	0.709648	-0.911753	0.00261479	-0.267509	-0.306919
AMY2A	-0.108659	0.0957678	0.600201	-0.77395	-0.528698	-1.05637
ANGPT1	-0.245284	0.586131	-0.508996	-0.107304	-0.709889	0.0113436
ANGPT2	1.09976	1.19126	0.850082	-0.365148	1.17799	0.301026
ANO1	-0.632906	0.592532	0.355249	-0.890973	1.23469	1.1128
ANPEP	0.229674	0.896593	-0.497389	0.0777277	-0.967297	-0.200593
ANXA3	0.616264	0.532515	1.68092	2.33967	1.04686	1.10459
ANXA5	0.707448	0.085493	0.907874	0.570727	0.411981	-0.685317
AOAH	1.51569	1.08527	-0.539231	-0.463516	-0.247825	-1.51199
AOC3	0.0640054	0.454905	-0.0110784	0.331849	0.22172	-0.420815
AOX1	0.106681	-0.18013	0.641584	0.542378	0.620487	0.537794
APCS	0.724681	1.55534	0.130164	0.0324185	-0.128058	-0.45923
APEH	0.184747	0.139404	0.631102	0.892645	1.54299	1.02657
APH1A	0.203156	0.802723	-1.39921	-0.573766	-0.769562	-0.436394
APH1B	0.18116	0.131603	1.27348	0.602912	1.34046	1.6488
APLNR	0.144656	0.935958	1.3183	0.621321	0.244966	0.201791
APOB	0.226816	1.02719	-0.348146	-0.716798	0.0874502	-0.426143
APOH	0.0101564	-0.30652	0.917493	0.932695	1.14527	1.1784
APP	0.636859	1.16192	-0.0581923	-0.203802	-1.68124	-1.34163
AQP1	1.13386	0.685047	0.266023	0.440742	-0.845487	0.649609
AQP10	0.254078	-0.174873	-0.215233	-0.885536	-1.45855	-0.495557
AQP2	0.436767	0.510437	1.42638	1.24377	0.937122	1.00477
AQP3	0.62049	0.25344	-0.0883726	0.498169	-0.16522	-0.695895
AQP5	-0.756431	-0.661347	-2.03791	-1.21738	-1.36396	-1.12813
AQP6	-0.480542	-0.27428	0.457891	0.624279	0.934913	-0.287569
AQP7	-0.794493	-0.401698	-2.20068	-3.12022	-2.90424	-2.99867
AQP8	0.285039	0.30594	0.761728	-0.085731	0.0460203	0.599618
AQP9	0.0137617	0.591107	0.192091	-0.00190654	0.898205	0.82373
AR	-0.0221867	-0.131466	-0.238283	0.308107	0.173764	0.942341
ARAF	0.420258	0.756863	0.383303	-0.455361	-0.101247	-0.0879611
ARG1	-0.0578245	0.706027	0.535517	0.564592	-0.0806769	0.584901
ARG2	0.356678	0.040086	0.222374	0.398596	-0.0623131	0.822769
ART1	0.742591	1.02915	0.405181	0.138677	0.468843	0.581466
ATAD2	-0.0755944	-0.191811	-0.552244	-0.715015	-1.06569	-0.0387249
ATAD2B	0.414471	1.18785	0.924	0.522932	0.868055	0.665088
ATM	0.420417	-0.00781375	0.261403	0.556769	0.0721461	0.383752
ATP1A1	-1.92831	-2.1417	-1.14115	-1.95693	-0.332008	-0.688866
ATP1A2	0.963068	0.982122	-1.16014	-1.33436	-1.26979	-0.604033
ATP1A3	0.165303	0.636687	-0.882789	-0.87214	-0.583192	-0.816037
ATP1A4	-0.0971238	0.8808	1.4324	1.59695	0.889041	0.52272
ATP1B1	0.703759	0.360757	-0.3194	0.553626	0.549658	0.872473
ATP1B2	0.830343	0.681403	0.950491	1.0897	-0.546658	0.512202
ATP1B3	0.970564	0.744761	0.458216	-0.133166	-0.316306	-0.155112
ATP2A2	-2.01071	-2.58192	-1.36533	-2.13468	-1.20495	-1.72701
ATP4A	0.888533	0.736631	-0.520752	-0.403437	-0.597728	-1.12457
ATP4B	0.910272	0.367219	0.654833	-0.147439	0.682028	0.49444
ATP6AP1	-3.20218	-2.27423	-4.21292	-4.56444	-2.65826	-3.39451
ATP6V0C	-2.12301	-2.82302	-2.0133	-1.38588	-2.53415	-1.12856
ATP6V1A	-1.2566	-2.31839	-4.70697	-3.28066	-4.22113	-3.75648
ATR	-1.75246	-1.6763	-1.74759	-0.718144	-0.843006	-0.608089
AURKA	-2.26839	-3.04379	-4.43734	-4.81141	-5.29005	-4.45076
AURKB	-2.44212	-1.07621	-0.343888	-1.13346	-1.40775	-1.47317
AURKC	0.733484	0.496303	1.06942	0.908524	1.24098	1.17236
AVPR1A	0.671581	0.702849	0.752456	0.219562	0.0982429	-0.639177
AVPR1B	0.574022	-0.118874	1.37974	1.97301	2.02089	1.21882
AVPR2	1.01129	0.232061	2.47793	1.99648	2.07685	1.38456
AXL	3.47638e-06	1.11594	1.54534	1.45929	0.914514	1.08744
BACE1	-0.27592	-0.383685	0.635092	0.296918	0.857648	0.901814
BACE2	-0.102331	1.09837	1.18916	0.807172	0.960793	0.283033
BANF1	-1.37975	-2.04633	-0.517925	-1.27219	-1.38603	-1.76288
BAX	0.213743	0.59036	1.1011	0.111222	0.583521	0.906022
BAZ2A	-0.10156	-0.0204831	-1.05037	-0.726374	-1.06746	0.157455
BAZ2B	0.444309	-0.743395	0.997565	0.294042	1.92898	0.668843
BCAT2	0.63847	0.100938	-0.166744	-0.271596	0.721185	0.375497
BCHE	0.63359	0.25836	0.784855	0.793596	1.71917	1.15048
BCL2	0.387819	0.2876	1.35367	1.54419	1.3627	0.929064
BCL2A1	-0.0140513	0.00766612	0.959607	0.573444	0.755678	1.90993
BCL2L1	-1.30956	-1.79087	-1.43696	-1.74717	-1.93607	-1.54227
BCL2L10	0.964539	0.399272	-0.228674	0.438787	0.727884	0.979659
BCL2L2	0.120325	0.0513373	0.980323	-0.141043	0.977651	0.0830698
BCR	1.52858	0.829613	-0.335936	-0.534382	0.124681	-1.20629
BDKRB1	0.253062	1.12328	1.0356	0.803597	0.667126	1.08006
BDKRB2	0.62105	0.985603	0.270894	0.0632991	0.170023	0.627855
BIRC2	0.998048	0.228989	0.472437	-0.239481	-0.456469	-0.156107
BIRC3	0.422742	0.411288	1.97911	1.96996	1.98651	0.752298
BIRC5	-2.43651	-0.929803	-2.67565	-0.905201	-1.72144	-2.91699
BIRC7	0.631325	0.554545	0.10257	-0.295365	-0.233549	0.314428
BLK	0.100491	-0.10488	0.0142654	-0.450748	0.838637	-0.19229
BLVRB	0.389503	0.643345	2.31903	1.84633	1.98194	0.240212
BMP1	-0.367945	0.611105	-0.339306	-0.371418	-0.53914	-0.900911
BMP10	-0.527524	-0.0430441	0.60236	0.095744	-0.130644	-0.264017
BMP2K	0.865929	1.02913	0.454196	0.712734	1.09868	0.232543
BMPR1A	0.07732	-0.426158	-4.04774	-4.26292	-2.00959	-2.38082
BMPR2	-1.6247	-1.75982	-0.105872	-0.165632	0.0740469	-0.131164
BMX	0.819181	0.953457	1.08201	1.54509	2.04486	1.91174
BPTF	-1.1511	-0.899362	-1.25574	0.0913667	-1.0838	-1.26574
BRAF	0.429691	0.152381	1.51498	1.16047	1.63352	0.741914
BRD1	-1.49424	-1.3814	0.374141	-0.613347	0.771645	0.462714
BRD2	0.311766	-0.218584	0.199039	0.334785	0.134011	0.319817
BRD3	0.368335	0.538215	0.661544	0.278893	1.09268	0.68449
BRD4	-0.640214	-0.423004	-1.76973	-1.14352	-1.24242	-1.12599
BRD7	-1.56175	-0.580326	-0.711255	0.43403	0.385372	0.914712
BRD9	-0.348868	0.0720246	-1.60926	-0.11302	-0.068294	-0.409819
BRDT	-1.02828	-1.07294	1.21455	1.34206	0.598105	0.852561
BRS3	0.93451	-0.060935	0.750333	0.969742	0.539415	1.29235
BRSK1	1.14805	0.892505	-0.165738	-0.27113	-0.834562	-0.453882
BRSK2	-0.155127	0.309975	-0.29168	-0.427365	-0.327466	-0.457439
BTK	0.317295	0.363458	-1.29891	-0.760803	0.0960032	0.0885914
BUB1	-0.0448649	-0.612823	-0.288522	-0.739964	-0.351619	0.268275
C1QB	0.56181	0.78922	0.361438	0.988221	0.0209938	0.759172
C1S	0.2526	0.599237	-0.429931	-0.41971	0.37807	0.0104313
GATD3	0.239841	0.0578507	-0.974919	-1.58264	-0.835988	-1.59041
C3AR1	0.317524	0.403576	-2.05872	-2.10023	-2.22611	-2.0499
C5	1.69542	0.335736	-0.732454	-0.510531	0.562248	-0.77486
C5AR1	0.200351	0.184328	0.265086	0.282228	0.218247	0.191344
C5AR2	0.714173	-0.160575	1.78534	1.83585	1.95998	1.62827
C6	0.609772	0.336016	0.674384	1.2186	1.36734	1.34437
C7	0.791814	0.739318	-0.125679	-1.6064	0.419382	-1.53718
C8G	0.263229	0.403171	1.08613	0.845998	0.895036	0.744719
AOPEP	-0.140626	0.213577	2.41777	2.28777	1.36509	1.54461
CA1	1.24697	0.556671	0.557413	0.727315	0.0341591	0.247022
CA12	0.540981	0.52595	1.44197	0.975266	0.375822	0.683467
CA13	0.691126	-0.0892034	1.09888	0.781549	1.06646	1.24511
CA14	0.362906	0.0592968	1.64998	2.38475	1.4327	2.4407
CA2	0.705253	0.684907	1.41489	1.556	1.72209	0.461584
CA3	0.598284	0.343247	-0.0162606	0.748712	0.934672	0.471387
CA4	0.116615	-0.165271	-1.23608	-0.279209	0.0823916	-1.50208
CA5A	-0.796594	-0.232344	-2.35185	-1.86053	-0.357168	-0.639381
CA5B	-0.57663	-0.619878	5.0624	4.05803	3.5916	3.86244
CA6	0.370591	-0.0489875	0.242847	-0.223128	0.378196	0.387864
CA7	0.632259	0.830711	0.294048	0.252734	0.524377	0.70908
CA9	-0.198583	-0.443072	0.524541	0.00223206	-0.586398	-0.166933
CACNA1A	0.177408	0.505695	-0.594617	-0.867334	-1.17247	-1.20472
CACNA1B	-0.0924303	0.478314	0.217664	0.511533	0.638274	0.0914532
CACNA1C	0.796858	0.0792669	0.433316	0.473322	0.0292686	0.206394
CACNA1D	0.542289	0.752424	-1.16864	-1.32359	-1.15687	-1.42868
CACNA1E	0.345323	0.495322	2.20326	2.01734	2.32053	2.67921
CACNA1F	0.341185	0.484248	0.811736	0.599574	0.373954	1.1526
CACNA1G	-0.0719517	0.105727	1.79948	1.34737	1.42912	1.5904
CACNA1H	0.357804	-0.0225694	0.727924	0.30279	0.856847	1.0288
CACNA1I	0.649725	0.178352	-0.027976	0.1278	0.501639	0.237982
CACNA1S	-0.204887	-0.660552	0.437949	0.701811	0.830177	0.519974
CACNA2D1	0.698131	0.611549	1.98051	0.83048	2.01876	1.5374
CACNA2D2	0.296676	0.719927	-0.024492	0.824264	0.353666	-0.280108
CACNA2D3	0.665837	0.768731	0.726623	1.00223	0.0574834	0.427742
CACNA2D4	0.847039	0.412058	0.925352	0.434009	1.0544	0.437692
CACNB1	0.805264	0.86454	0.905577	1.00519	0.489385	0.501199
CACNB2	0.726619	0.849471	1.53814	0.886491	1.5118	1.22318
CACNB3	-0.0362788	-0.257646	-0.611497	-0.0396848	-0.296108	-0.392163
CACNB4	0.492878	0.807396	1.06706	0.0517932	1.17737	0.969796
CACNG1	0.367607	0.581622	1.20405	0.253634	-0.245406	-0.0307511
CACNG2	0.645452	0.431216	1.48794	1.74029	1.4837	1.77601
CACNG3	-0.125962	0.234267	1.59164	0.636355	0.934192	0.749242
CACNG4	0.790577	-0.00848893	-0.42768	-0.640173	0.0682502	-0.982806
CACNG5	0.200303	-0.834415	1.84079	1.34459	2.19469	0.740447
CACNG6	0.109838	0.692476	1.74802	1.0908	1.34652	1.58176
CACNG7	1.403	0.935141	-0.470122	-0.848482	-1.06796	-0.745939
CALCA	0.128024	0.319135	1.24605	1.46226	0.524126	0.879046
CALCB	0.418576	0.180106	-2.41841	-1.55915	-2.175	-2.71265
CALCRL	0.0794542	0.144448	1.24275	1.00019	0.324038	-0.215101
CAMK1D	0.452855	1.05345	1.92338	1.4653	1.55681	1.97083
CAMK2B	0.0483488	0.221674	0.152896	0.158634	-0.252206	0.792663
CAMK2D	0.56704	-0.171672	1.82111	2.05242	1.87117	1.71823
CAMK2G	-0.312791	-0.700105	-0.0792947	0.292652	-0.64031	0.12006
CAMKK1	0.645872	0.595429	0.24865	0.297325	-0.0626939	0.125751
CAMKK2	-0.949004	-0.117752	-0.87676	-0.773038	-0.283587	-0.516771
CAPN2	-0.0321715	0.0566195	0.844847	0.598927	-0.214688	-0.0845418
CARM1	-1.96478	-1.94697	-1.57175	-1.60741	-3.22443	-4.11986
CASP1	0.365269	0.77887	0.0815591	-0.104776	0.0953905	-0.555743
CASP10	-0.121082	-0.218047	-0.795218	-0.885147	-0.964024	-0.777782
CASP14	-0.425154	-0.0541039	0.913997	0.876235	1.51063	2.32215
CASP2	0.412571	0.483828	-0.155427	0.303878	-0.136193	-0.498071
CASP3	-0.833628	0.384129	-0.272177	-0.243265	-0.0765013	-0.440517
CASP4	0.533392	0.550714	0.910288	0.891969	1.73756	1.11464
CASP5	0.612247	0.555036	0.725908	2.05477	1.03228	2.08518
CASP6	0.452318	0.330685	0.643275	0.0143716	-0.106534	-0.352168
CASP7	0.908077	0.784828	-0.304304	-0.75313	0.194992	-0.825961
CASP8	-0.211822	-0.709496	-0.0779213	0.656679	0.972243	0.207048
CASP9	-0.347397	0.310241	-0.624842	-1.08441	0.454957	-0.971083
CASR	0.272873	-0.200478	-0.0201718	-0.78399	-0.666165	-0.968111
CBR1	0.817477	0.714157	-0.278475	0.353258	0.792792	0.0642231
CBS	0.206102	0.437804	-0.608786	-1.92966	-1.51465	-2.08894
CBX4	-0.0350693	0.505718	0.1259	-0.505699	-1.09357	-0.129649
CCKAR	0.595178	0.0760196	0.693934	1.25162	0.175104	0.679327
CCKBR	0.359067	0.389388	0.373732	0.779784	1.53902	1.05677
CCL11	0.188169	0.340035	1.47853	1.5687	2.13146	1.68602
CCL2	0.264495	0.335192	1.83543	2.86221	2.57743	2.93301
CCND1	-2.30995	-2.54664	-5.26708	-4.52977	-4.17758	-4.17904
CCR1	0.170562	0.4696	2.06744	2.66102	0.4878	1.20447
CCR2	-0.173667	0.133454	1.13318	1.39879	1.08838	0.366948
CCR3	0.146354	-0.499726	0.93533	1.42533	2.20249	1.88371
CCR4	0.0510224	0.204638	0.172254	0.518557	0.0468032	0.0800319
CCR5	0.191141	0.175071	0.290941	0.308809	0.242377	0.219349
CCR8	0.373304	0.696051	-0.0608118	-0.121492	-0.297837	-0.233498
CCR9	-0.122483	-0.105604	0.240841	0.228208	0.780258	-0.569774
CCT2	-3.3598	-3.77059	-2.97411	-2.83729	-0.946184	-2.07564
CD14	0.240929	0.556858	0.872869	1.32145	0.982297	1.08727
CD2	-0.0486711	0.607858	-0.799855	-0.76227	-0.594946	-1.46936
CD200	0.545978	1.30244	0.632626	0.00499947	0.223241	1.72007
CD248	-1.12458	-0.983022	-2.25552	-2.69542	-2.22554	-1.55277
CD274	0.381778	-0.406557	-0.286899	0.539788	0.210938	0.380704
CD28	0.449002	1.07877	0.166862	-0.0270848	1.36559	-0.098613
CD38	0.763747	1.03915	1.0361	0.938069	0.678098	0.614265
CD3D	1.23445	1.19439	-1.56399	-1.60874	-0.930261	-1.94136
CD3E	0.440783	0.629281	0.976608	1.06265	0.894602	1.80677
CD3G	-0.156528	0.443574	0.18722	-0.996656	0.0909527	-0.0744076
CD4	-0.253177	0.28697	0.705612	1.77586	1.92695	1.60934
CD40	0.575867	1.40421	-0.246716	-0.594659	0.0481668	-0.79823
CD40LG	0.845077	0.192438	0.819998	0.176693	0.826507	1.12059
CD52	0.292072	0.354094	0.0422265	0.142872	-1.10502	-0.22572
CD74	-0.0259859	-0.351819	1.50574	1.51207	1.04949	1.82548
CD80	0.449143	0.705606	1.28041	1.90592	1.29159	0.284343
CD86	0.0269152	0.314058	1.74603	2.36304	2.44222	1.84139
CDC42BPA	0.161765	0.172092	-0.276101	-1.28619	-0.888612	-0.332216
CDC42BPB	0.617128	-0.0671026	-0.226225	0.600794	0.940563	0.705745
CDC7	-1.68114	-2.431	-4.94715	-4.64338	-3.94965	-4.28586
CDK1	-1.47024	-0.990124	-3.72884	-3.10393	-3.10191	-3.53924
CDK10	-0.119681	-0.466388	-1.02657	-1.29948	-1.20368	-1.49705
CDK11B	-0.156084	-0.153753	0.0677751	0.293195	0.118612	0.486202
CDK12	-2.3256	-1.24884	-2.50159	-2.3878	-1.78427	-2.32239
CDK13	-0.167223	-0.627354	-1.50924	-1.61897	-1.55766	-0.893851
CDK14	1.26504	0.692243	0.516171	0.35457	-0.430082	0.762628
CDK15	0.044559	-0.408192	0.184275	-0.515738	-0.234848	-1.19702
CDK16	0.460187	0.41318	-0.619182	-0.116188	-1.02594	-0.549291
CDK17	0.347562	0.188565	0.0966814	0.0503507	-0.222196	-0.0360335
CDK18	-0.0544387	-1.18789	0.0640701	0.499143	0.868784	0.341951
CDK19	-0.176259	0.466983	2.50692	2.15733	2.83112	1.8473
CDK2	-0.399609	-0.732181	-1.66805	-1.2699	-1.9918	-3.05896
CDK20	0.119424	0.527538	-0.264849	0.0133596	-0.324155	-0.405395
CDK3	0.0720637	0.599424	-1.30616	-1.55095	-2.10863	-1.76581
CDK4	-1.37891	-2.20648	-3.59279	-3.0346	-2.33325	-1.69091
CDK5	0.414154	0.213582	0.339254	0.246671	0.549314	1.17229
CDK6	-0.655859	-0.380064	-1.44704	-1.7026	-1.37665	-1.0794
CDK7	-1.72992	-2.01727	-0.41932	-0.838487	-0.797935	-1.94963
CDK9	-1.66036	-1.31633	-2.96479	-3.39231	-3.22351	-2.39626
CDKL1	0.706514	1.06721	-0.330121	-1.1335	-0.431082	-0.813658
CDKL2	1.17631	0.0913686	0.246686	-0.546591	0.531188	0.244195
CDKN1A	-0.196691	0.392644	1.83746	0.557648	1.27581	1.44522
CDKN3	0.726082	0.395182	-0.614763	-0.435495	-0.896424	0.00523908
CDS1	0.252397	0.592042	0.384095	0.864273	0.546401	0.243402
CECR2	0.734792	0.874282	1.55541	0.880375	1.58591	1.86314
CELA1	-0.304431	-0.154665	-0.0374562	-0.416406	0.61222	-0.219676
CENPE	-0.942676	-1.08184	-2.46422	-1.01026	-1.79759	-1.6955
CERK	-0.196154	0.283421	0.916216	1.26695	0.865144	-0.217354
CES1	-0.681172	-0.588036	-0.719841	-0.0540797	0.330975	0.0960273
CETP	-0.0067262	0.473221	-1.01538	-0.573039	-1.3936	0.307733
CFB	0.412246	-0.0171236	-1.43265	-1.34282	-1.51775	-1.59431
CFD	0.624717	0.736514	1.69337	1.63906	1.37934	1.19145
CFTR	0.572668	0.354167	-0.364113	-0.338069	-0.263752	0.176505
CH25H	0.758539	-0.0680605	-1.59748	-1.21757	-1.4886	-0.536453
CHEK1	-1.24715	-1.47643	-1.41705	-2.58554	-1.10976	-1.81037
CHEK2	0.304347	0.880099	1.13401	0.545329	1.58112	1.06078
CHKA	-1.21502	-0.397049	-2.024	-0.741928	-1.43023	-0.866395
CHRM1	0.203756	-0.207837	-0.807723	-0.948523	-1.38335	-0.69387
CHRM2	0.45867	0.369539	1.62046	1.62999	1.26891	1.64072
CHRM3	0.584016	0.283423	0.42566	0.835408	1.60591	0.667976
CHRM4	-0.845374	-0.914197	0.339881	-1.40844	-0.472932	-0.349567
CHRM5	0.798679	0.363075	0.278413	1.01667	0.357809	0.886842
CHRNA1	-0.17208	0.315324	-1.922	-1.28162	-1.08246	-1.65946
CHRNA10	0.3997	0.36656	1.44616	-0.0466595	0.491973	0.770418
CHRNA2	-0.0167623	0.277552	1.12743	1.16876	0.468669	1.1798
CHRNA3	0.0196367	-0.038138	-0.230007	-0.324529	-0.310725	-0.798421
CHRNA4	0.544764	0.699508	1.14449	0.84534	0.145524	0.403682
CHRNA5	0.153653	1.01773	1.43933	2.14628	1.33719	1.60529
CHRNA6	1.55421	1.62169	1.10128	0.602726	1.4838	1.27891
CHRNA7	0.922438	0.091705	-1.49896	-1.02716	-0.949208	-0.221267
CHRNA9	0.446714	-0.16151	-0.580485	-0.275094	-0.953279	-0.747334
CHRNB1	1.06931	0.244179	0.132154	0.742061	0.333675	0.410627
CHRNB2	0.641482	0.0812738	0.78457	0.347663	0.960055	0.747032
CHRNB4	0.0653761	0.227314	0.684851	-0.38539	0.176305	0.318807
CHRND	-0.437227	-0.474168	-0.7302	-0.536629	-0.624838	-0.901941
CHRNE	-0.0581047	-0.128592	-0.044126	-0.561977	-0.704155	-0.171738
CHRNG	0.789993	0.65811	-0.0426761	0.365395	0.320578	0.718147
CHUK	0.575727	0.306325	-1.71572	-1.41911	-0.878952	0.309011
CIAO1	-2.21422	-1.89168	-0.425697	-1.07862	0.0102594	-0.160461
CLEC4C	0.0395082	0.508802	0.315255	1.58882	1.46295	1.26833
CLK1	0.375908	0.320768	0.425253	0.00354799	0.20933	0.95068
CLK2	-2.09573	-0.92457	0.780342	0.565677	-0.581375	0.148541
CLK3	0.632329	0.46731	0.439383	0.11288	0.499293	0.676321
CLK4	0.950062	0.768918	0.945066	1.32714	1.2936	1.78329
CLU	0.939951	0.137516	-1.70633	-1.69341	-0.26742	-0.551381
CMA1	0.558424	-0.05958	-0.38851	-0.0813303	0.426672	0.268042
CNGA3	0.188766	-0.866982	-0.521059	0.273208	-0.557834	1.11891
CNR1	0.28455	1.3912	0.92904	1.04917	1.23198	0.922905
CNTN1	0.332305	0.434556	-0.0814656	0.376823	-0.718922	-0.592902
COL4A5	-0.0886942	0.0346987	1.50662	2.18212	1.74142	2.34057
COMT	0.103611	-0.103641	1.53585	1.64261	1.87242	1.35755
COPS6	-0.415814	-1.73087	-1.82992	-2.41696	-1.26296	-1.7456
CPA1	0.284184	0.874025	-0.429952	-0.574313	-0.684448	-0.0806212
CPB1	0.55826	1.07317	-0.803405	-0.0968497	-0.526555	-0.698326
CPB2	0.613228	0.285038	-0.271789	-0.566267	-0.218887	0.57864
CPM	-0.379994	-0.0765177	0.00498872	0.476754	0.513967	1.16435
CPN1	1.20956	0.900822	0.401276	-0.290277	-0.933209	0.386257
CPT1B	-0.0310786	0.980067	-0.356461	-0.440432	-0.213836	-0.218849
CPT2	-0.511412	0.471469	-2.13332	-1.10501	-1.49998	-1.39302
CRBN	0.96608	0.638439	1.3079	1.52595	0.148882	1.67273
CREBBP	1.35767	1.41141	1.61765	1.48482	0.730567	1.06845
CRHR1	-0.351413	1.15998	-1.42265	-1.3597	-1.90518	-1.46583
CRHR2	-0.0480172	0.791369	-0.285075	-0.75462	0.0147141	-0.402922
CSE1L	-1.61548	-2.18733	-1.23499	-2.69538	-1.89959	-2.10391
CSF1	0.0431556	0.139126	0.075323	0.074446	0.229107	-0.645287
CSF1R	1.08979	0.866362	0.103048	0.655307	0.376497	-0.445222
CSF2	0.0834706	0.0291548	0.427781	1.29606	0.130193	-0.0992247
CSF2RB	1.03557	0.602999	0.2753	0.534756	0.22882	0.436156
CSK	-0.533735	-0.437489	-1.73978	-0.687149	-1.19992	-1.22494
CSNK1A1	-2.89652	-2.54547	-2.15339	-2.31234	-2.6244	-2.39782
CSNK1D	-0.191344	-0.341236	0.433339	0.758718	1.22694	0.989979
CSNK1E	-0.0256029	0.466399	0.17201	0.678093	0.224175	-0.0107533
CSNK1G1	0.209127	0.0698332	1.44867	0.776573	0.681605	0.940431
CSNK1G2	0.503433	0.755555	0.336694	0.640783	1.10146	0.79481
CSNK1G3	0.833892	0.873347	1.22908	-0.00639038	1.84871	1.67882
CSNK2A1	0.0653224	-0.214682	-0.446195	-0.756467	-2.02976	-1.24685
CSNK2A2	1.04662	0.725137	-0.473271	0.196634	-0.794342	-0.429989
CSNK2B	-2.02986	-2.46067	0.137959	-1.99888	-0.131273	-0.640503
CSRP2	-0.0581982	1.1108	-0.05978	-0.0686778	-0.0390744	-0.0829539
CSTF1	-0.809881	-0.705338	-0.676407	-0.951221	-0.246085	-0.287264
CCN2	-0.0686826	0.316081	0.338813	0.819131	1.02076	0.359149
CTH	0.510602	0.429837	1.1035	1.53121	0.521531	1.13016
CTLA4	0.0490329	0.207269	1.77623	2.17072	1.132	1.81178
CTRC	-0.277298	-0.275495	-0.36412	-0.473737	0.67665	-0.701474
CTSA	0.100447	-0.232438	-1.18333	-0.66805	-0.964277	-2.11466
CTSB	0.829362	0.775459	0.941449	-0.0144577	0.503316	0.517815
CTSC	0.721972	0.199978	1.25704	1.49064	1.12712	1.58523
CTSD	0.740559	0.93451	-0.875983	0.693056	-1.01346	-0.203511
CTSE	0.246064	0.196826	0.168017	-0.0930611	0.604274	0.843723
CTSF	-0.704219	-1.21223	-1.83291	-0.873311	-0.788086	-0.987457
CTSG	0.133782	-0.118757	-0.49584	-0.133174	-0.273492	0.25471
CTSH	0.92496	0.0592595	-0.463693	-0.366813	-0.766431	-0.590761
CTSK	0.603888	-0.122027	1.26362	0.48261	0.832637	1.81259
CTSL	-0.132337	-0.809767	-1.49171	-1.6186	-0.986017	-1.9552
CTSO	0.275964	1.384	1.93771	1.69632	2.47492	1.91484
CTSS	0.708265	1.49904	0.80835	0.179747	0.873752	0.196083
CTSV	0.306442	0.108988	-0.0746844	1.50711	1.33017	1.24222
CTSZ	0.425769	0.26521	-0.15513	0.933111	0.687787	0.66581
CUL4A	0.502569	0.419651	0.392542	1.2274	-0.122225	1.61999
CXCL10	1.21257	0.729599	0.729023	0.562052	0.867943	0.139729
CXCL8	-0.111508	-0.250216	0.574844	1.0885	1.73104	1.10909
CXCR1	-0.245985	-0.171672	-2.18059	-1.27519	-1.48574	-1.55994
CXCR2	-0.185156	-0.900366	-0.630428	0.601327	0.199587	0.0736331
CXCR3	0.122943	-0.1802	-0.0421886	1.18988	0.419344	-0.410465
CXCR4	0.424718	0.490369	0.496741	0.664422	-0.105464	0.764062
CYP11A1	0.702871	-0.0457261	-1.81001	-1.8272	-1.67435	-1.83104
CYP11B1	0.610052	0.598373	1.69887	0.954638	1.69466	1.07135
CYP11B2	0.727857	1.04027	1.57172	1.01782	1.7377	1.51812
CYP17A1	0.17804	0.0413593	0.905743	1.31722	0.502326	0.936523
CYP19A1	0.838492	0.922432	1.02265	1.39308	2.25939	1.36163
CYP1A1	0.29418	0.158592	1.83682	2.06458	2.03051	1.88464
CYP1A2	0.612014	-0.287573	0.695322	0.798586	0.652183	0.881438
CYP1B1	0.567204	0.567418	0.764796	0.446046	1.18855	-0.197025
CYP24A1	0.745603	0.543028	0.573621	0.0356652	0.297994	0.226322
CYP26A1	0.131662	-0.173658	-0.598244	-0.175663	0.294114	0.218856
CYP27A1	0.251418	0.362619	-0.025674	0.681284	0.311973	-0.800036
CYP27B1	-0.372335	-0.283414	-0.565229	-0.300773	0.502797	-0.411833
CYP2A6	0.150382	0.648882	2.27361	1.27157	1.02036	1.69074
CYP2B6	0.566924	-0.0924274	2.39446	1.49176	0.13749	1.04872
CYP2C18	0.476673	0.972147	0.964525	1.00403	-0.153659	1.49422
CYP2C19	0.917418	0.587019	0.85217	-0.0889617	0.850431	0.113374
CYP2C8	0.864528	0.628417	-0.708336	0.086498	-0.248611	-0.998491
CYP2C9	0.197374	0.402683	0.342803	0.762919	1.57787	1.45249
CYP2D6	-0.0348708	0.271121	1.98745	1.44257	1.30849	1.96426
CYP2E1	0.600198	0.488967	-0.700219	-0.374871	-0.83037	0.143477
CYP2J2	0.198348	0.181695	0.273047	0.29084	0.224716	0.204311
CYP3A4	0.380442	0.359965	2.15618	2.55508	2.00161	1.44492
CYP3A43	-0.359772	0.855732	0.507463	-0.00724777	0.244526	0.0674183
CYP3A5	0.970143	-0.375088	-0.0694366	-0.143793	0.384361	-0.326615
CYP3A7	0.324856	0.580805	0.62527	0.778865	1.41919	1.8338
CYP4F2	0.0407388	0.423062	0.858178	0.800718	0.610133	0.431819
CYP51A1	0.394756	-0.133171	1.1786	0.287314	1.65037	1.61604
CYSLTR1	0.581167	1.18942	0.77565	1.02019	0.302262	1.09519
CYSLTR2	0.123972	-0.112122	1.27069	1.54236	0.923197	0.017674
DAPK1	0.501728	0.180973	-0.0556801	0.451506	0.00756629	-0.169025
DAPK3	0.119662	0.150298	0.919069	1.2175	-0.18774	0.207464
DCLK1	0.652527	0.456634	1.37262	2.0872	0.0930242	0.121594
DCLK2	0.314832	0.696355	1.93738	2.66789	2.58513	2.6805
DCLK3	1.18688	0.664278	-1.88199	-1.64992	-1.00404	-2.50294
DCPS	-2.35595	-1.49772	-0.940194	-1.2207	-0.406825	-0.610216
DDAH1	-1.0467	-0.623546	1.08726	-0.594877	-0.187602	1.06684
DDB1	-1.95624	-0.867799	-2.91245	-2.16251	-2.4647	-2.12298
DDC	0.619509	1.08389	1.24359	1.0691	1.03924	1.08651
DDR1	0.452692	0.370703	-1.01599	-0.563224	-0.605592	-0.383889
DDR2	0.811359	0.329515	2.87747	2.96355	3.12269	2.33057
DEGS1	0.556696	0.592906	0.492739	0.033549	0.243725	0.919616
DEPTOR	0.241254	0.570922	0.359577	-0.061474	-0.117761	-0.354076
DGAT1	1.21318	0.681496	-0.484379	-0.210986	-0.432538	-0.252507
DGAT2	0.613905	0.686402	0.628707	-0.118891	-0.484232	0.116412
DHDDS	-1.16876	-1.71751	-2.78632	-2.05955	-3.01627	-2.09122
DHFR	-3.11579	-2.37306	-3.84138	-4.47219	-3.22254	-3.52581
DHODH	-0.134438	0.169223	0.399547	0.578308	0.687244	0.444558
DHX15	-1.79542	-1.12207	-2.31613	-2.297	-3.57144	-2.37022
DIO1	0.353433	0.697382	0.575627	0.919203	-0.0674547	1.38896
DKK1	-0.0175399	0.547537	0.650043	-0.440727	1.09249	1.22204
DLL4	0.452388	0.828398	-0.439804	0.261256	0.239612	0.380793
DLX3	0.71074	1.16764	-1.23485	-0.889828	-1.76731	-1.6391
DMPK	0.284347	-0.0699295	-0.239831	0.00660719	0.0512737	-1.00271
DNMT1	-2.1514	-0.950035	-1.20739	-1.6307	-0.891338	-1.02063
DNMT3A	0.130786	0.622927	1.51609	0.781401	1.36663	0.571338
DNPEP	-0.0541351	0.034138	0.455186	0.494704	0.53956	0.660887
DOT1L	0.944388	1.12092	-0.940646	-0.830628	-1.01729	-1.64623
DPEP1	0.222241	0.863769	0.407464	-0.207938	0.0115336	0.39654
DPP4	0.289935	0.29056	2.03971	3.12897	2.62681	2.57664
DPP7	0.0372478	0.601714	0.394087	-0.130946	-0.402039	-0.0421095
DPP8	0.551699	0.287376	-0.6729	-0.728261	-0.0148139	-0.5234
DPP9	0.238202	-0.517972	-1.36997	-0.687921	-0.94024	-1.21184
DRD1	1.04489	0.963012	1.18181	1.28666	1.36209	1.14205
DRD2	0.187455	-0.0681773	0.411053	-0.387679	-0.430007	0.695501
DRD3	0.142912	0.882389	-0.0483348	0.0228725	-0.722244	-0.75352
DRD4	0.186372	0.118034	0.0753802	0.550655	-0.301625	-0.509528
DRD5	1.26782	0.695677	-0.00751003	-0.00799962	-0.233578	0.383227
DYRK1A	0.835457	0.832487	2.18937	1.98936	1.76464	3.23914
DYRK1B	0.336709	0.907807	0.840455	1.58831	0.110212	1.82205
DYRK2	0.797138	0.112376	-0.17099	0.0655096	-0.146067	-0.0773968
DYRK3	-0.00478342	0.664278	1.61992	1.07785	1.05183	0.886001
DYRK4	0.232586	1.03146	1.13383	1.10944	0.962116	2.33214
ECE1	0.408281	0.722193	0.526706	0.882504	1.03738	1.02448
ECE2	-0.910592	-0.158473	-0.207775	-0.316672	-0.830509	-0.230109
ECT2	-2.53412	-2.11958	-1.77223	-2.23787	-2.66048	-1.83236
EDNRA	0.198493	0.181898	0.275745	0.297312	0.22707	0.204709
EDNRB	0.619136	0.0830867	0.12116	-0.145982	0.124268	-0.139614
EED	-0.498452	-0.697068	-0.516176	0.22699	0.573533	0.263484
EEF2	-1.98426	-2.61766	-1.41533	-0.474344	-1.25284	-1.09186
EEF2K	0.229121	0.773777	0.618523	1.15621	-0.110404	0.68066
EGFL7	-0.477483	0.659255	0.721991	0.295501	0.722386	-0.0308451
EGFR	0.894604	1.1558	0.194376	0.869003	1.17315	0.701279
EGLN1	-2.31019	-1.8903	-2.33348	-1.625	-2.17767	-1.66755
EGLN2	0.742171	0.252945	1.11783	0.496977	0.672145	0.215502
EGLN3	0.457782	0.711657	-0.40075	-1.17569	-0.869045	-0.98684
EHMT1	-1.33196	-0.778275	-0.878951	-1.79652	-1.22586	-0.841102
EHMT2	-1.52359	-0.883078	-0.636238	0.363178	-0.313771	-0.493941
EIF2AK1	0.411275	0.745626	-1.63769	-1.33425	-0.909	-0.706182
EIF2AK2	0.447111	-0.0686913	2.33807	3.16682	1.78876	2.19897
EIF2AK3	-1.00332	-0.432396	0.517557	-0.636234	-0.806459	-0.411034
EIF2AK4	0.514151	0.578328	0.063829	-0.867846	-0.0814218	-0.705726
EIF4E	-2.70458	-2.61673	-3.17129	-3.67825	-1.69588	-2.2585
EIF5	-2.10874	-2.16139	-2.42109	-2.51837	-2.10588	-4.96754
EIF6	-4.29266	-3.9131	-3.41475	-4.01247	-3.9434	-3.90909
ELANE	0.289202	0.57681	0.150754	-0.0507796	-1.04755	-0.870435
ENG	0.15929	0.447966	0.844924	1.47153	2.47132	1.45717
ENPEP	0.20642	0.112077	1.35946	1.01701	1.0167	1.46872
ENPP2	0.443188	0.817044	1.4531	1.05792	1.485	1.84072
ENTPD1	1.4369	-0.595769	0.785537	0.608871	0.575775	-0.0470822
ENTPD2	0.462523	0.159659	0.743901	0.773658	0.713221	1.50935
EP300	-0.519655	-1.81236	0.0410457	0.172196	-0.22267	-0.335115
EPCAM	0.104685	-0.133428	0.465575	0.869103	0.543919	0.925067
EPHA1	-0.150854	0.508778	1.03765	0.850032	1.11976	0.44118
EPHA10	0.119732	0.281704	0.249062	1.11492	0.173199	0.929686
EPHA2	0.900979	0.570782	1.5803	1.59039	1.30976	1.55042
EPHA3	0.412928	0.121983	0.862089	0.52956	0.626714	1.016
EPHA4	0.938713	0.86162	1.555	2.14789	0.702858	0.989371
EPHA5	-0.756594	-0.010449	0.275562	0.041984	-0.218993	-0.339502
EPHA6	1.09346	0.293948	-0.014598	-0.605434	-0.513972	0.169683
EPHA7	0.705533	0.642948	3.08233	2.93581	3.1112	3.68057
EPHA8	0.526036	-0.00628352	2.18676	1.59128	1.47586	1.67516
EPHB1	0.239614	0.106624	0.74358	0.949147	1.32029	0.965471
EPHB2	0.342343	0.371618	0.942285	0.978001	1.10663	0.882747
EPHB3	0.601833	-0.0458523	-1.34241	-1.31047	-0.797635	-1.50395
EPHB4	0.333071	0.467194	0.769346	0.821713	0.658538	1.29095
EPHB6	0.696263	0.580034	-0.90909	-0.940436	-2.10148	-1.72789
ERAP1	-0.256306	0.206676	-0.359985	-0.644647	0.973223	0.880873
ERAP2	0.339707	-0.311776	1.72266	1.43513	2.39213	1.58746
ERBB2	0.964936	0.300961	0.0126529	-0.320721	-1.02197	0.196508
ERBB3	-0.0905622	0.0888105	0.447041	0.0711714	0.188954	0.13143
ERBB4	0.214224	0.0294328	-0.739324	-0.508479	-0.516828	-1.2023
ERG	-0.677482	0.304818	1.20028	0.999947	1.96085	1.05331
ERN1	-1.01681	-1.34619	-1.08427	0.0350364	-0.379358	0.0496893
ESR1	0.00413422	0.815806	0.260642	-0.197856	-0.00389157	-0.181218
ESR2	0.637209	0.683412	0.632823	0.9293	0.187578	0.0988141
ESRRA	0.00482773	0.0298603	-1.96405	-2.3141	-2.52571	-2.11613
ESRRB	-0.0928039	-0.0202776	-0.00900657	-0.324166	0.192249	0.0931004
ESRRG	0.924143	0.868418	0.264813	0.529379	0.490625	0.523272
EZH1	-1.11851	0.227295	1.88403	1.58249	0.50875	0.182644
EZH2	-1.38984	-1.10278	0.329737	-0.113705	0.142321	-0.636805
F10	0.728557	0.827814	-0.148653	-0.69255	0.329287	-0.542048
F11	0.867424	1.1525	-0.369681	-0.166411	0.910675	0.527154
F12	-0.0471766	0.116677	1.03616	0.644337	0.612641	1.36125
F2	-0.394892	0.193985	0.36393	0.0351534	-0.0757575	0.385482
F2R	0.466142	1.1387	0.444961	0.815334	1.42629	1.14931
F2RL1	0.483258	0.822838	0.969295	0.422307	-0.103379	0.96785
F2RL3	0.262223	0.105381	-0.434602	0.173365	-0.832259	0.401629
F5	0.11586	0.274179	0.883778	0.481059	0.772972	-0.285858
F7	0.835363	-0.284629	1.25065	1.88951	2.48754	2.37752
F8	0.511793	1.80994	-0.429567	0.468994	-0.384455	-1.23002
F9	0.848019	-0.208024	0.508137	1.13231	0.64058	1.15771
FAAH	-0.751504	0.486467	-1.12948	0.350811	-0.550869	-0.624382
FABP3	0.412111	0.516208	-0.313471	0.123774	0.0415537	-0.921351
FABP4	0.454653	0.529548	2.47286	1.65536	2.0396	2.95101
FABP5	0.527928	0.703924	-4.11919	-4.19452	-4.01115	-2.92283
FAP	-0.0291359	0.260047	1.01444	0.541263	1.56291	1.05531
FARSA	-1.474	-1.66649	-2.42597	-3.08723	-2.80863	-1.2952
FASN	-0.193142	-0.734985	-3.01837	-2.09256	-2.25487	-2.49788
FBL	-4.93457	-3.3447	-2.88067	-2.11687	-1.81498	-2.12134
FBP1	0.332807	0.71126	0.806182	-0.152467	-0.114075	-0.315413
FCER2	0.403023	-0.149034	1.57154	2.21703	1.43988	1.3292
FCGR2A	-0.111508	-0.163706	-0.978166	-0.691277	0.134684	-0.23471
FDFT1	-0.392043	0.832977	-0.0293537	-0.53935	-0.166967	-0.252699
FDPS	-1.54503	-0.827523	-4.1023	-3.83537	-3.13025	-2.1143
FER	0.387924	0.241677	0.667004	1.68094	0.355093	1.23401
FES	0.948684	0.449578	-2.41378	-2.0363	-1.81995	-1.84531
FFAR1	0.21819	-0.194824	0.445968	0.125792	0.530718	0.523937
FFAR2	1.18555	0.578375	0.370092	0.292185	0.57883	-0.0373841
FGA	0.585978	0.373006	2.43629	1.69311	2.25044	2.56966
FGB	1.02422	0.478805	0.748008	0.17545	0.311166	0.478977
FGF1	0.349617	0.229454	-0.453348	-0.00045641	-0.02395	0.506424
FGF2	0.616287	0.607531	-0.223736	0.260736	0.727851	0.635353
FGF23	0.551185	0.792911	0.612101	1.09733	1.33908	0.375707
FGFR1	0.919519	0.702172	0.880127	1.6487	1.57291	1.9549
FGFR2	0.18245	0.411101	-1.00489	-0.820826	-0.460399	-0.710526
FGFR3	-0.895368	-1.37908	0.272561	-0.398651	0.699646	-0.34866
FGFR4	-0.0532712	-0.400623	-0.899846	-1.67624	-0.743409	-1.14372
FGG	0.466399	0.55055	2.38835	1.3838	1.47511	2.78899
FGR	1.15912	0.482636	0.865622	1.05482	1.23134	1.13835
FKBP1A	-1.22699	-1.4884	-1.61081	-0.875304	-1.13289	-1.46886
FLT1	0.0881547	0.218186	3.73153	3.39999	4.26374	2.94929
FLT3	0.577525	0.213483	0.276932	0.650213	1.02249	0.852446
FLT4	0.615446	0.409325	0.783604	0.243894	-0.515409	-0.0212519
FNTA	-1.28416	-1.43132	-0.883332	-0.801638	-0.921974	-0.721709
FNTB	-1.86337	-1.53456	-2.44922	-2.61244	-1.83572	-1.8488
FOLH1	-0.386556	-0.581891	-1.25406	0.199811	0.567875	0.627923
FOLR1	1.14948	-0.399105	0.409281	-0.0874122	-0.614412	0.266133
FPR1	1.13736	0.587182	-0.0291169	0.0984657	-0.343308	-0.739455
FPR2	0.702614	0.718175	-0.532287	-0.879154	-0.159326	-0.0623741
FPR3	0.886525	0.750321	0.170223	0.376705	1.32315	0.258731
FRK	1.01822	0.355681	1.06404	1.29421	1.14299	0.858564
FSHR	0.768347	0.831225	1.09123	1.50302	0.768848	1.07704
FURIN	-0.605025	-0.166509	0.122956	0.511966	0.89358	1.0256
FXYD2	0.546772	1.03688	0.784729	1.52923	1.38034	0.689724
FYN	0.932222	0.0772695	0.917926	1.32824	1.35847	0.494015
FZD1	0.0434148	0.278143	0.473385	1.10098	1.10202	0.480185
FZD2	-0.460134	-0.347497	2.33746	2.71807	2.67072	1.34672
FZD5	0.622522	0.987542	-1.09539	-0.646107	-0.354158	-0.864747
FZD7	0.112587	0.595172	-0.697881	-1.05809	-1.39655	-1.07712
FZD8	0.287887	0.245924	0.168423	0.536673	0.172953	0.531439
GAA	0.752492	0.470067	0.879443	1.10141	0.113298	1.06269
GABBR2	0.332361	-0.151698	1.89912	0.797275	1.13665	1.34902
GABRA1	0.954802	0.944229	-0.473377	-0.464689	-0.228026	-0.0671519
GABRA2	0.814931	0.977286	1.80416	1.289	1.78714	0.761923
GABRA3	0.564915	0.813213	0.220607	0.230685	0.794866	-0.0048682
GABRA4	0.483188	0.960582	0.893517	1.15541	0.915649	1.10036
GABRA5	1.3697	0.918764	0.521487	0.656601	0.918707	1.37758
GABRA6	-0.0877835	1.00238	-0.27346	0.70722	0.28572	0.927112
GABRB2	0.735329	0.402237	2.22325	1.33736	1.22432	0.178528
GABRR1	0.796858	0.0310308	1.86736	0.965522	1.1405	1.9058
GABRR2	-0.267794	-0.313295	-0.141235	0.395742	-0.378941	-0.0435222
GABRR3	-0.571633	0.414418	-0.319074	-0.323305	-0.0873108	-0.498909
GAK	-1.39213	-1.31348	-1.30466	-1.3556	-2.10314	-0.834034
GALR1	0.354876	0.87024	2.26757	2.52705	2.18279	2.30542
GALR2	0.616637	0.187847	0.669291	-0.168492	0.146044	0.185021
GALR3	0.792071	0.713946	-0.425241	-0.777657	-0.512585	-0.600413
GART	-0.202739	-0.325023	-0.280556	0.185619	-0.569973	-0.43898
GBA1	-1.55673	-0.684101	-2.54189	-2.36587	-0.487989	-1.47562
GC	-0.160101	-0.381676	0.142404	-0.367256	0.010073	-0.12921
GCGR	0.202431	0.844729	0.411004	0.528793	1.3053	0.484244
GCK	0.827751	0.981328	-0.213823	0.0364122	0.140371	0.864343
GDF2	-1.04371	0.305744	-1.12057	-1.42237	-0.66397	-0.889365
GGCX	-0.0222824	-0.741713	-1.39566	-2.19328	-1.73945	-1.61394
GGPS1	-1.2379	-1.67527	-1.0994	-1.21928	0.201607	-0.56872
GHR	0.489166	0.830945	2.58731	2.25828	2.00572	2.5449
GHRHR	0.558307	0.614072	1.16729	1.88624	1.2789	1.55834
GHSR	0.435132	0.496443	-0.430578	-1.25741	0.146106	0.0105397
CBLIF	-0.420858	-0.121093	0.656585	0.0283644	0.412976	0.24453
GIPR	0.336216	0.268471	2.32008	1.82238	1.38837	1.2405
GJA1	-0.488995	-0.498511	1.41388	0.941712	1.63936	1.31605
GJA4	0.487438	0.626198	-0.975766	-0.146634	-0.76032	0.0174357
GJA5	0.687857	0.187197	0.68959	0.326244	1.21027	-0.16077
GJA8	0.213883	0.399111	0.874683	0.400004	0.889819	1.35224
GJB2	0.526527	0.954835	-0.528504	-0.0639108	-0.834299	-1.00555
GJB3	-0.444886	-0.195876	-0.267493	-0.247298	-0.421015	0.343169
GJB4	-0.295091	-0.348128	0.596268	0.942549	0.916803	1.07668
GJB5	-0.237298	-0.261641	0.482476	0.217264	0.492145	-0.343091
GJB6	0.246293	0.254283	0.0935924	-0.242725	0.605663	0.0951096
GJC2	-0.0867327	-0.414033	-1.1313	-0.737432	-1.05907	-1.48691
GJD2	-0.263614	-0.110486	0.974551	1.45485	1.91049	1.20953
GJD3	0.408536	0.747939	0.239291	0.125986	0.247489	-0.17548
GJD4	0.779275	1.2085	2.05943	1.75274	1.76907	2.30926
GLP1R	0.320368	0.775319	-0.460834	-0.390318	-0.524492	0.594775
GLRA3	-0.511902	0.100305	0.415232	1.3548	1.43207	0.699039
GLRB	0.267806	0.402777	0.677206	1.04008	1.16813	0.296375
GLS	-0.103779	-0.235358	0.782508	1.23605	1.44946	0.96522
RACK1	-2.9082	-3.28115	-3.02621	-2.51173	-4.00349	-2.76835
GNG7	0.491758	0.512049	1.38625	2.06172	1.6699	0.752117
GNRH1	1.37523	0.90262	1.43361	0.993183	0.920547	1.4822
GNRHR	-0.748865	-0.142166	1.32268	0.80407	0.260874	-0.088484
GP1BA	-0.676081	-1.16955	0.684046	1.30195	0.841307	0.369788
GP2	1.04064	1.03137	0.569943	1.27495	0.739694	0.520086
GPD2	-0.141327	-1.09794	0.332825	0.466955	0.697935	1.13331
GPER1	0.688721	0.441962	0.10536	0.359453	0.519885	0.924623
GPN2	-3.5891	-3.71989	-3.08377	-2.94169	-2.51826	-3.39451
GPN3	-0.740692	-0.619435	-1.89228	-1.74754	-1.36948	-1.14988
GPR139	1.01815	0.527632	2.21546	2.26305	3.07427	3.18378
GPR55	-0.381232	-0.440923	2.53014	2.39604	2.57772	3.12434
GPR87	0.769327	0.465138	1.26148	1.11292	1.89158	2.15773
GRIA1	0.666654	0.778146	2.78287	2.35922	1.30363	1.80755
GRIA2	0.639568	0.741561	0.629031	0.895511	0.902031	1.22148
GRIA3	0.373073	0.814124	1.03532	0.568009	1.25554	0.67662
GRIA4	0.36243	-0.107169	1.87448	0.896297	0.917303	1.49145
GRIK1	0.100862	-0.302595	0.767547	1.20875	1.16608	1.20044
GRIK2	0.3241	0.375181	1.78453	1.0984	1.38867	1.63765
GRIK3	0.811919	-0.131629	-1.24562	-0.444118	-0.158863	0.268875
GRIK4	1.49803	0.997985	0.995705	1.46523	0.486348	0.501954
GRIN1	-0.0168581	0.85363	0.674432	0.44782	-0.134305	0.437656
GRIN2A	1.15774	0.552513	0.783755	0.483033	0.793869	0.398403
GRIN2B	0.182797	0.415423	0.370541	-0.0125461	-0.144786	0.286832
GRIN2C	0.314222	0.661381	2.0736	2.14184	1.67095	2.35875
GRIN2D	0.296985	0.172157	1.68793	1.56449	1.18913	1.56736
GRIN3A	0.86245	0.723128	0.0928627	0.139207	-0.750265	0.338127
GRIN3B	-0.342797	-0.156931	2.54611	2.3591	2.45093	3.25466
GRK4	0.147335	0.782678	0.60225	0.686673	1.16868	0.233493
GRK5	0.517887	0.766698	-0.0847025	0.109184	-0.475104	-0.537284
GRK6	0.79973	0.348163	1.45752	0.941238	0.701618	1.48771
GRK7	0.0978149	0.40095	0.51496	0.511898	0.417399	-0.33121
GRM1	-0.275336	-0.28804	1.69596	0.24009	0.160917	-0.603739
GRM2	0.241559	0.0960621	0.340991	1.67993	1.86269	1.07084
GRM3	0.629293	0.89414	-1.61939	-0.939892	-0.902717	-1.00723
GRM4	0.427403	0.0295309	2.37296	3.29622	2.63777	2.37463
GRM5	0.350094	0.575198	0.711413	0.561151	1.38445	1.09008
GRM6	0.681762	0.588257	1.26458	1.19588	0.852022	1.46224
GRM7	0.318451	0.561881	-1.14484	-1.1935	-0.614722	-1.98378
GRM8	0.138945	0.782048	1.43068	1.65472	2.14979	1.72869
GRPR	1.2387	0.82674	-0.690961	-1.39295	-0.639948	-1.78048
GSK3A	1.1166	0.372843	1.60594	1.74194	0.957849	1.45279
GSK3B	0.931685	0.41832	0.228383	0.647836	0.976527	0.455355
GSR	0.715551	0.6365	-1.75684	-0.928948	-0.231733	-0.272069
GSTP1	0.176365	-0.336213	-1.08524	-0.691305	-0.229454	-0.3589
GUCY1A2	0.920103	0.29524	1.19517	0.959362	0.080436	0.596304
GZMB	-0.996056	-0.654361	0.0756135	-0.623236	-0.392023	-0.620344
HCFC1	-1.09347	-0.738582	-1.98232	-2.07227	-2.58277	-1.27899
HCK	-0.115104	0.254365	0.411239	-0.254189	0.328714	-0.44145
HCN4	0.0054185	0.164361	0.949004	0.940549	0.155087	0.223271
HCRTR1	-0.677459	-0.18576	0.730576	0.0412164	0.232302	0.0350239
HCRTR2	0.700513	0.193829	0.41611	0.532055	0.486593	0.64101
HDAC1	0.109696	-0.159804	-1.8724	-1.34706	-1.41744	-1.12743
HDAC10	0.056337	0.177433	-1.68833	-1.60523	-2.05915	-1.72279
HDAC11	0.368438	-0.3685	-0.321053	-0.551583	-0.368698	-0.965065
HDAC2	0.497572	0.151179	-1.42389	-1.67762	-0.876435	-2.13388
HDAC3	-2.05333	-2.53426	-0.947144	-1.31295	-1.5118	-1.50954
HDAC4	0.131858	0.297125	1.4267	1.76559	1.17551	2.15833
HDAC5	0.51742	0.0745781	-1.29116	-1.06198	-2.26899	-1.29325
HDAC6	-0.0394312	0.16478	-0.214177	-0.851369	-1.34428	-0.974531
HDAC7	-0.568224	-0.100955	1.82788	1.6997	2.06518	2.47592
HDAC8	0.00851481	-1.53853	-1.21998	-0.68684	-0.562525	-1.14321
HDAC9	0.801458	0.750508	0.842489	1.18831	0.332888	1.77409
HDC	0.488255	0.394027	-0.904375	-1.7705	-2.20924	-2.51015
HEATR1	-1.35858	-0.644689	-4.29498	-2.57794	-2.89934	-3.47474
HEBP1	0.524729	-0.296194	-1.15565	-1.04375	-0.766223	-1.85833
HGF	0.62495	0.227583	-0.150026	-0.535998	-0.644317	0.206829
HIF1A	0.135708	0.232584	-0.121067	-0.698955	-0.716692	0.430512
HIPK1	-0.0502823	0.161116	0.920056	0.226495	0.00624944	0.566613
HIPK2	0.506725	0.0725246	2.15589	2.42907	2.16741	0.678142
HIPK3	0.960873	0.372081	0.770756	0.735168	1.35555	1.08827
HMGCR	-0.578195	-1.08958	0.278546	-0.758725	0.459798	-0.0778702
HMGCS1	-0.665363	-0.651698	-1.30379	-2.16172	-0.694916	-1.05518
HMOX1	1.09997	0.962288	0.828495	1.26552	0.528731	1.02955
HNF4A	-1.19834	-1.09659	-1.52809	-1.42467	-0.799507	-1.12422
HNMT	1.12678	0.446378	-0.254254	-0.413216	0.459059	-0.408641
HNRNPK	-1.50716	-1.2412	-1.22505	-0.570686	-1.1166	-0.659348
HPD	0.937733	0.233304	-0.501361	-0.511858	-1.0835	-1.079
HPGD	0.455307	0.352461	0.51663	0.360228	0.0376597	0.289419
HPGDS	0.326477	0.249258	-0.0064723	0.705242	-0.00784421	-0.254906
HPSE	0.899461	0.330573	2.36717	1.90673	1.6647	2.69985
HRAS	-0.36965	0.048111	-0.165766	-0.19818	-0.263634	-0.0863458
HRH1	0.734605	0.254959	1.80826	1.62009	1.18722	0.977568
HRH2	0.33942	0.430281	1.73359	2.18626	2.10018	2.18858
HRH3	-0.194846	0.0265008	0.742651	0.559464	1.28996	0.974705
HRH4	0.946886	1.03513	-2.61697	-2.63984	-2.75732	-3.62325
HSD11B1	0.967178	0.338498	-1.1671	-0.710262	-0.983294	-1.08143
HSD3B2	-0.780272	-0.0765644	-0.917016	-0.729694	-0.70576	-1.40631
HSP90AA1	-0.499316	0.0493258	-0.447937	-0.427631	-1.00135	-0.527185
HSP90AB1	-0.0266887	-0.625719	-1.41533	-0.96223	-1.67225	-0.633425
HSP90B1	-1.89436	-1.58229	-0.257675	-0.942877	-0.971108	-0.656338
HSPA5	-2.0708	-3.0223	-2.66614	-2.60971	-2.16605	-3.26242
HSPA8	-2.44959	-3.93156	-2.53904	-3.03297	-2.77809	-1.13872
HSPB1	-0.486987	0.127013	1.34377	1.7101	0.85944	1.27694
HTR1A	0.501985	0.536837	2.39939	1.69236	2.46953	2.15827
HTR1B	-0.103639	-0.25309	0.368147	-0.466907	0.632285	1.66749
HTR1D	0.649328	0.276288	-0.880173	-1.33094	-1.32563	-2.5088
HTR1E	0.343441	0.606877	0.130206	0.1405	0.176139	-0.370002
HTR1F	-0.164514	0.364446	-1.19308	-1.30176	-1.55101	-2.67161
HTR2A	1.24608	0.806368	0.00779292	-0.113533	-0.00682854	0.238024
HTR2B	0.0578315	0.785342	-2.32772	-2.60078	-2.4213	-2.08182
HTR2C	0.587542	1.36419	-0.384819	0.0951697	-0.119028	0.330255
HTR3A	1.15907	-0.483676	1.06863	0.579633	1.40513	0.496122
HTR3B	0.346105	0.960512	-1.33653	-0.351691	-0.81011	-0.255349
HTR3C	0.841901	-0.147913	1.15075	0.777993	1.42	-0.0756171
HTR3D	0.480362	0.335143	0.225065	0.51651	1.52987	1.2395
HTR3E	0.822754	-0.237905	1.06178	1.3925	0.246573	0.407087
HTR4	1.03975	0.745672	2.29536	1.04556	1.35408	1.30824
HTR5A	0.453206	-0.117892	1.20813	0.935127	0.217765	1.02127
HTR6	0.64704	0.327837	0.392059	0.0654644	0.646074	0.278391
HTR7	-0.0597626	-0.242624	-0.359302	-0.0501433	-1.02098	-0.828146
HTT	0.37127	0.191978	-0.574061	-0.918478	-0.915137	-0.443943
ICAM1	0.841621	-0.0458593	-0.54008	-0.247695	-0.755353	0.118282
ICAM3	0.141798	0.260143	0.293116	-0.374137	-0.357028	-0.593285
ICE1	-0.62569	-0.70202	-0.961201	-2.01068	-1.76386	-1.41306
IDE	-0.385879	0.0339791	1.40403	0.226616	-0.406805	0.163602
IDH1	1.11452	0.313301	-0.836559	-0.789277	-0.41004	0.0418543
IDH2	-0.604161	0.434977	0.584927	1.65962	0.67202	0.920311
IDI1	-1.0336	-1.19195	-0.920833	-1.70416	-1.70077	-1.96957
IDO1	0.550648	0.374856	0.753307	0.865002	0.486907	1.95364
IFNAR2	-0.0139789	0.470044	2.15698	2.35353	1.61304	2.19079
IFNG	0.319808	0.589589	1.55183	1.26022	0.0147372	-0.327486
IGBP1	-2.62916	-1.76505	-3.12621	-0.969236	-2.17529	-1.25381
IGF1	0.470158	0.249282	1.93772	1.86977	1.28046	1.15962
IGF1R	-0.895204	-0.780821	0.74651	0.354988	1.03879	0.385667
IGF2	1.03574	1.04733	-0.177884	0.348483	-0.442587	-0.536327
IKBKB	0.692223	0.436986	0.393559	0.466333	1.06074	1.51078
IKBKE	-0.33341	-0.354903	1.49741	0.601691	0.844128	1.10186
IL10	0.5938	0.259126	1.23202	0.746262	1.1134	1.14779
IL12A	0.541728	0.0716041	0.0694898	0.530631	-0.487107	-0.07226
IL12B	0.722836	0.103842	1.11677	0.23622	0.525092	0.0858149
IL13	0.635528	1.16042	1.3991	1.44981	1.34758	2.16339
IL15	0.588616	0.36838	0.00742405	1.11985	0.0318644	0.21956
IL17A	0.0184342	0.227298	-0.502272	0.307227	-0.773988	-0.892972
IL17RA	0.278222	0.0986273	0.701487	0.495422	0.214164	0.754999
IL1A	0.440573	-0.131723	-0.462143	-1.53673	-0.569969	-0.219128
IL1B	0.545628	1.08148	-0.0665363	-0.784788	0.196951	-0.0545842
IL1R1	-0.429801	0.383573	0.268664	-0.365796	-0.0713445	1.32967
IL1R2	0.216518	-0.399502	-0.913639	-0.565993	-0.831732	-0.147992
IL22	0.357342	0.388549	-1.78553	-1.95121	-1.70908	-1.28148
IL23A	0.201011	0.0693637	1.11315	2.01933	0.810285	0.493577
IL2RA	0.487998	0.80249	0.795422	1.36471	0.542434	0.850452
IL2RB	0.845848	0.651405	1.42613	1.43238	2.49228	0.549373
IL2RG	0.480596	0.653578	1.3419	2.12361	0.703696	2.04793
IL4	0.339144	0.158204	-0.358012	-0.0508763	-0.587062	0.208557
IL4R	1.14352	0.0340025	0.508455	0.194711	-0.414143	-0.487083
IL5	-0.549637	-0.604132	0.68532	0.446355	1.59501	1.38044
IL5RA	0.634103	0.639935	1.70009	1.92571	2.10995	1.12524
IL6	0.740583	1.02712	-0.47276	0.508427	0.696092	0.128015
IL6R	0.944061	0.873534	1.31109	0.454468	0.605492	-0.375361
IL6ST	0.745556	1.1308	-0.155169	-0.84435	-0.752036	0.305919
IL9	0.808627	0.0926349	2.92554	2.8591	3.28186	1.94235
ILK	0.686619	0.0573741	0.615293	1.20271	-0.0375712	0.317579
IMPA1	0.612971	0.651359	0.466269	0.326417	0.15367	1.25566
IMPDH1	-0.15424	-0.183891	-0.676118	-0.324314	-0.493128	-1.38622
IMPDH2	-0.69259	0.0281385	0.648877	1.19103	1.07438	1.48064
INHBA	-0.0587819	0.732379	2.65653	1.8836	1.80153	0.409816
INPP5A	0.141742	-0.305375	1.97223	1.25883	1.29049	1.09664
INPP5D	0.278484	-0.0153271	1.35911	0.694822	0.939503	0.945551
INPPL1	0.399125	-1.01991	-0.204593	-0.590419	-0.912266	-1.93169
INSR	-0.644394	-0.176088	0.416129	0.868836	-0.187856	-0.668919
INSRR	0.49881	0.717918	-0.367275	0.205979	-0.111906	-0.540099
IRAK1	1.21243	0.277319	-0.770011	-0.303149	-0.364122	0.460839
IRAK3	0.400582	0.91582	1.49086	1.68713	1.32222	2.0638
IRAK4	0.296532	0.600569	0.214652	0.784826	1.25457	-1.17801
ISG15	-0.215021	0.444532	0.41721	0.634188	1.19434	0.799728
ITGA2	0.542242	1.12912	1.96635	2.2697	1.84859	1.85928
ITGA2B	0.645265	0.855265	-0.142842	0.0114328	0.438612	0.604114
ITGA4	0.510205	0.394892	-0.399033	-0.857736	-0.219349	0.00559087
ITGA5	-0.376398	-0.373056	0.175503	0.0590274	0.185343	0.512026
ITGAL	0.137532	0.331982	0.994315	1.16755	0.159673	0.273903
ITGAM	0.0506792	0.236888	-1.14009	-0.377099	-1.13378	-1.80048
ITGAV	-0.615486	-0.532223	-1.0535	-0.704135	-0.971237	-0.589578
ITGB1	0.805568	0.769525	2.65692	2.97739	3.40749	2.83171
ITGB2	0.358775	0.91846	0.327181	0.467381	0.420282	0.40903
ITGB3	-0.104853	0.180662	-0.240259	-1.14812	-1.3996	-1.50057
ITGB5	-0.488808	-0.215009	0.0646115	0.837707	0.696519	-0.196911
ITGB6	-0.197952	0.0125722	0.281742	-0.310064	0.22327	-0.432043
ITGB7	0.232794	-0.220056	0.152521	-0.682716	-0.469624	0.394118
ITK	-0.310012	-0.173191	0.648997	0.248629	1.12733	0.0722772
ITPKA	0.140316	0.356914	-0.69813	-0.828495	-0.742371	-0.816585
ITPKB	-0.787487	-1.99337	0.846248	-0.334373	-0.425789	0.0264041
ITPR1	0.227888	-0.248114	1.66096	0.762705	1.8391	1.16179
ITPR2	0.57122	0.198968	0.361958	0.844717	0.720734	0.790068
ITPR3	1.00776	0.48857	-0.291564	-0.449619	-0.934122	-1.2691
JAK1	-0.00374665	0.0410135	0.681172	0.497417	0.775013	0.513458
JAK2	1.19155	1.54749	0.00448412	-0.197294	-0.570781	-1.71695
JAK3	-0.316667	0.239432	-2.45284	-1.72038	-1.7179	-3.1323
JUN	-0.856115	-1.01694	-1.5585	-0.983926	-1.29284	-1.76698
KARS1	-1.97233	-1.99202	-2.15241	-2.77506	-0.617408	-0.48507
KAT2B	0.479428	0.378027	-1.09348	-1.30925	0.0300008	-1.14043
KAT5	-1.52402	-2.18546	-3.72978	-4.26855	-4.18803	-4.51003
KAT8	-2.01949	-1.44807	-2.0174	-2.1026	-2.34255	-1.56826
KCNA1	0.544834	0.550387	0.932802	0.926801	0.707998	0.748147
KCNA10	0.788638	0.590804	-0.483033	0.0797162	-1.17212	-0.057342
KCNA2	0.300901	0.603232	0.994442	1.5426	0.804121	1.49999
KCNA3	0.455424	0.00571303	0.870212	0.52299	1.84506	0.93323
KCNA4	0.270526	0.282715	1.21453	0.817457	1.15024	1.17441
KCNA5	0.547029	1.03602	0.216762	-0.00343164	0.298254	0.817266
KCNA6	-0.0857286	-0.293413	1.62789	1.50899	1.95427	0.96926
KCNA7	0.981095	1.19797	0.433503	0.517513	0.868433	0.10442
KCNB1	1.15099	0.830291	-0.03908	-0.117247	0.398291	-0.283231
KCNB2	0.500421	0.763848	0.768803	0.543174	0.36977	1.22323
KCNC1	0.826887	-0.34411	0.451871	0.8643	1.20184	0.482118
KCNC2	0.293043	0.455326	0.706134	0.430369	1.05857	0.625847
KCNC3	0.555225	1.08893	0.243779	-0.226027	0.237676	-0.0921177
KCNC4	0.658528	0.320852	0.544658	0.251725	0.44149	0.880122
KCND1	-0.906763	-0.179499	-0.113625	-0.287086	-0.721362	-0.314552
KCND2	0.94294	0.411498	1.3564	0.882055	-0.245847	0.438473
KCND3	-0.252616	-0.126163	-0.714707	-0.496794	-0.548965	-0.87954
KCNF1	0.911907	1.14199	1.05277	1.80467	1.15342	1.75243
KCNG1	-0.590337	0.154278	1.77507	2.72712	2.5227	3.25442
KCNG2	0.983407	1.00995	-0.175946	-0.508326	-0.0216238	-0.760296
KCNG3	-0.123627	0.10786	-1.92195	-1.40836	-1.18839	-1.46671
KCNH1	0.203929	1.06401	0.261406	0.290959	0.376545	-0.134029
KCNH2	0.0076018	0.484528	0.622709	1.4258	1.30667	0.817709
KCNH3	-0.146184	-0.0933853	0.016092	-0.29746	-0.393812	0.203808
KCNH4	-0.270199	0.0108995	0.041211	0.347393	1.06001	0.224115
KCNH5	0.732527	0.0879998	1.74296	2.23226	1.20633	1.16336
KCNH6	0.298696	0.132732	0.580963	0.485508	1.11601	0.814174
KCNH7	0.13466	0.0107943	0.762699	0.856398	0.602965	0.886444
KCNH8	-0.0545788	1.06655	2.36851	2.40223	2.71019	3.35597
KCNJ10	-0.0348755	-0.358618	1.79437	1.60579	2.43402	1.29832
KCNJ11	0.926197	-0.0105425	0.151016	0.594107	0.91297	1.09528
KCNJ12	-0.205705	-0.52713	0.154017	0.490124	1.29385	0.197562
KCNJ14	0.498249	0.842159	1.3717	0.822065	0.696987	0.356276
KCNJ2	0.131498	0.119913	2.09314	1.63886	1.9919	1.89017
KCNJ5	0.891965	1.97761	0.117808	0.4707	0.331523	0.496052
KCNK13	0.46787	0.387488	-0.263243	-0.268433	0.603427	-0.7204
KCNK18	0.1789	0.814241	0.830624	1.18852	0.510495	0.584208
KCNK3	0.709036	0.656452	0.0171653	-0.00850933	-0.684048	0.369869
KCNK9	0.415693	0.768053	0.830319	-0.149083	0.752922	1.25555
KCNN1	0.790483	0.375095	0.112598	0.0341543	-0.086918	-0.173897
KCNN2	-0.13661	0.741561	-0.126733	-0.121148	-0.642383	-0.777019
KCNN4	0.241611	-0.135414	1.45954	1.67961	1.82464	0.999287
KCNQ1	1.06233	0.825244	0.581529	0.545649	1.17995	1.07997
KCNQ2	0.224021	0.240666	0.242482	0.447792	-0.180506	0.274908
KCNQ3	-0.111881	0.525553	0.273408	1.15385	0.232445	0.681017
KCNQ4	0.657945	0.32487	-0.3037	-0.556894	-0.826258	-0.362223
KCNQ5	0.116493	0.337164	2.35954	2.09678	1.14825	0.961424
KCNS1	0.214204	-0.580443	0.98436	1.20145	1.36222	0.637439
KCNS2	0.373533	0.875216	0.95389	1.0964	0.799614	1.09185
KCNS3	0.335712	0.792537	0.0129451	0.682651	0.595565	0.266175
KCNV1	0.165415	-0.659384	-0.194156	0.207913	-0.270195	-0.454162
KCNV2	0.611126	0.712498	-0.571038	-0.788438	0.0285145	-0.695594
KDM1A	-0.76416	-1.75816	-1.83316	-1.26923	-1.18039	-0.900904
KDM2A	-3.03639	-2.98235	-2.0694	-2.51848	-1.25839	-1.26876
KDM3A	-0.287642	0.0930974	1.41795	0.639337	0.404437	0.0848328
KDM4A	0.412729	0.506068	-2.23437	-1.40095	-1.65375	-1.32613
KDM4C	1.3477	0.909139	0.476822	0.38751	0.0985759	-0.270775
KDM4E	0.458716	1.28875	-0.637965	-1.16943	-0.16327	-0.340232
KDM5A	0.384424	0.808984	0.539682	0.214812	0.202164	-1.5759
KDM5B	0.636392	0.625497	0.205177	0.507823	0.118933	0.436531
KDM5C	-0.19501	-0.250614	1.12025	1.05702	0.551622	-0.655269
KDM6A	1.055	1.1879	1.16967	0.559438	0.224623	1.58603
KDM6B	0.659135	0.425609	2.41315	2.30715	2.01006	1.62892
KDM7A	-0.774037	0.20879	0.56126	0.247457	0.444077	0.739764
KDR	-0.0108383	1.09587	0.0784255	-0.733615	0.227484	0.00362949
KEAP1	-0.0567037	0.701634	-1.85704	-1.76155	-1.28195	-2.13574
KIF11	-1.99094	-1.50746	-3.43801	-2.85935	-2.44309	-2.41333
KIR2DL1	0.541892	1.40129	1.39021	0.784992	1.35402	1.29628
KIR2DL3	-0.325961	0.54485	-0.267064	-0.137311	0.964358	-0.293251
KIT	0.335703	0.310168	1.50373	1.70032	1.12224	1.445
KLK1	1.13995	1.29581	0.0847562	0.284866	-0.353949	-0.0630158
KLK14	0.488582	-0.0477867	1.33609	1.11422	1.17744	1.28463
KLK2	0.988661	0.813096	1.65791	1.14573	1.57136	2.23752
KLK3	1.03095	0.591504	-0.600976	-0.0909696	-0.379839	0.0672305
KLK4	0.56669	0.787164	0.0998142	0.877964	0.44332	-0.0774573
KLK5	0.554594	0.41068	0.55448	0.795658	-0.126009	0.109013
[truncated: 886 more rows]

## Sheet: HepG2-RR Z-score and hits
Gene	HepG2WT_DMSO_R1	HepG2WT_DMSO_R2	HepG2RR_DMSO_R1	HepG2RR_DMSO_R2	HepG2RR_RRF_R1	HepG2RR_RRF_R2		HepG2RR mono hits					HepG2RR combo hits
[truncated: 1,806 more rows]
