# Supplementary material
Source: Research Square preprint supplement (doi:10.21203/rs.3.rs-8651907/v1)
Supplement: Supplementary file 7 [file f67952a6df77fcd21da4e8d7.xlsx]

## Sheet: Legend
Sheet	Legend
oligos and primers	Detailed information of oligos and primers in this study.

## Sheet: oligos and primers
Name	Sequence (5’ to 3’)
Primers for gene knockout
sgRNA_DUSP9-1#_Forward	GGTGCTCGTCCACTGCTTGGC
sgRNA_DUSP9-1#_Reverse	GCCAAGCAGTGGACGAGCACC
sgRNA_DUSP9-2#_Forward	CTGACCCCCGCCAAGCAGTGG
sgRNA_DUSP9-2#_Reverse	CCACTGCTTGGCGGGGGTCAG
sgRNA_COP1-1#_Forward	GGCCCAGCGCCGGCGTAGG
sgRNA_COP1-1#_Reverse	CCTACGCCGGCGCTGGGCC
sgRNA_COP1-2#_Forward	TGTATTCATCAGAGTTTGG
sgRNA_COP1-2#_Reverse	CCAAACTCTGATGAATACA
sgRNA_DET1-1#_Forward	GTTGACAACTGTGAAGTTG
sgRNA_DET1-1#_Reverse	CAACTTCACAGTTGTCAAC
sgRNA_DET1-2#_Forward	CTGCACATTACCAATGTTG
sgRNA_DET1-2#_Reverse	CAACATTGGTAATGTGCAG
sgRNA_KEAP1-1#_Forward	GGCCGCCTGATCTACACCG
sgRNA_KEAP1-1#_Reverse	CGGTGTAGATCAGGCGGCC
sgRNA_KEAP1-2#_Forward	CAACCCCATGACCAATCAG
sgRNA_KEAP1-2#_Reverse	CTGATTGGTCATGGGGTTG
sgRNA_PLXNB2-1#_Forward	GCAATGGGCCACACGACAA
sgRNA_PLXNB2-1#_Reverse	TTGTCGTGTGGCCCATTGC
sgRNA_PLXNB2-2#_Forward	ACCTGGCAAAGCTTCGTAG
sgRNA_PLXNB2-2#_Reverse	CTACGAAGCTTTGCCAGGT
sgRNA_CDKN1A-1#_Forward	CCACTGGGCCGAAGAGGCGG
sgRNA_CDKN1A-1#_Reverse	CCGCCTCTTCGGCCCAGTGG
sgRNA_CDKN1A-2#_Forward	CGACTGTGATGCGCTAATGG
sgRNA_CDKN1A-2#_Reverse	CCATTAGCGCATCACAGTCG
sgRNA_CDKN1A-3#_Forward	AATGGCGGGCTGCATCCAGG
sgRNA_CDKN1A-3#_Reverse	CCTGGATGCAGCCCGCCATT
Primers for base editing
sgRNA_KRAS(Q61R)_Forward	CAGGTCAAGAGGAGTACAG
sgRNA_KRAS(Q61R)_Reverse	CTGTACTCCTCTTGACCTG
sgRNA_NRAS(Q61R)-1#_Forward	GCTGGACAAGAAGAGTACAG
sgRNA_NRAS(Q61R)-1#_Reverse	CTGTACTCTTCTTGTCCAGC
sgRNA_NRAS(Q61R)-2#_Forward	GGACAAGAAGAGTACAGTGC
sgRNA_NRAS(Q61R)-2#_Reverse	GCACTGTACTCTTCTTGTCC
Primers for Sanger sequencing of base conversion
sgRNA_KRAS(Q61R)_Forward	TCCAGACTGTGTTTCTCCCT
sgRNA_KRAS(Q61R)_Reverse	TGCATGGCATTAGCAAAGACTCA
sgRNA_NRAS(Q61R)_Forward	TGAGGGACAAACCAGATAGGCAG
sgRNA_NRAS(Q61R)_Reverse	TGGCAAATACACAGAGGAAGCCTTCG
Primers for gene knockdown
shRNA_ARAF-1#_Forward	CCGGGCTCATTGTCGAGGTCCTTGACTCGAGTCAAGGACCTCGACAATGAGCTTTTTG
shRNA_ARAF-1#_Reverse	AATTCAAAAAGCTCATTGTCGAGGTCCTTGACTCGAGTCAAGGACCTCGACAATGAGC
shRNA_ARAF-2#_Forward	CCGGGCCAAACCTGTGGCTACAAGTCTCGAGACTTGTAGCCACAGGTTTGGCTTTTTG
shRNA_ARAF-2#_Reverse	AATTCAAAAAGCCAAACCTGTGGCTACAAGTCTCGAGACTTGTAGCCACAGGTTTGGC
shRNA_COL4A1_Forward	CCGGGCCAGGATTTATAGGCGAAATCTCGAGATTTCGCCTATAAATCCTGGCTTTTTG
shRNA_COL4A1_Reverse	AATTCAAAAAGCCAGGATTTATAGGCGAAATCTCGAGATTTCGCCTATAAATCCTGGC
shRNA_COL4A2_Forward	CCGGCCTGCTTTCTACGCCAATGTTCTCGAGAACATTGGCGTAGAAAGCAGGTTTTTG
shRNA_COL4A2_Reverse	AATTCAAAAACCTGCTTTCTACGCCAATGTTCTCGAGAACATTGGCGTAGAAAGCAGG
RT-qPCR primers for expression
human RPS28_Forward	CGATCCATCATCCGCAATG
human RPS28_Reverse	AGCCAAGCTCAGCGCAAC
Human ARAF_Forward	GGATGGCATGAGTGTCTACGA
Human ARAF_Reverse	GGTCAGCGGGACATCTTCA
Human COL4A1_Forward	GACCCCCGGGAGAAATAGGT
Human COL4A1_Reverse	ATCAGCCCTGGTGTACCTTG
Human COL4A2_Forward	CCTGTGGGCATGAAAGGTCT
Human COL4A2_Reverse	GGTCCCAGGCATTCCATCAA
Primers for cloning cDNA into pHAGE vector
Human CDKN1A Forward	﻿ATTCTCTAGAGCCACCATGTCAGAACCGGCTGGGGAT
Human CDKN1A Reverse	﻿CACAGGATCCTTACTTATCGTCATCGTCTTTGTAATCGGGCTTCCTCTTGGAGAAGAT
Human DUSP9 Forward	GCTTGGTACCGCGGCCGCCCGCCACCATGGAGGGTCTGGGCCGCTC
Human DUSP9 Reverse	CACAGGATCCCTACTTATCGTCATCGTCTTTGTAATCGGTGGGGGCCAGCTCGAAGG
Human DUSP9-C290S Forward	GTGCTGGTCCACAGCTTGGCGGGCG
Human DUSP9-C290S Reverse	CGCCCGCCAAGCTGTGGACCAGCAC
Primers for T7EI assay
sgRNA_COP1-1#_Forward	TGACTTCCGCCTCCTCGTCT
sgRNA_COP1-1#_Reverse	GTCTCAACAGCCGATTCCTAAGT
sgRNA_COP1-2#_Forward	CAGTGTCCTTGATGTTTGAGTTTGG
sgRNA_COP1-2#_Reverse	CCCAGGGGTCCCTGATATACACAAT
